# Supplementary material for: Genome-wide analysis of translational efficiency reveals distinct but overlapping functions of yeast DEAD-box RNA helicases Ded1 and eIF4A
Source: HighWire-hosted journal article supplement (doi:10.1101/gr.191601.115), 2015-06-29
Supplement: Supplemental_File_S1.xlsx [file Supplemental_File_S1.xlsx]

## Sheet: ded1-cs_all expression
#YORF	Gene	ribo_WT	ribo_ded-cs	mrna_WT	mrna_ded-cs	Δribo ded1-cs	ΔmRNA ded1-cs	ΔTE ded1-cs
Q0130	OLI1	5.215	4.38	4.7	4.8	-0.834849	0.060801	-0.89565
YAL001C	TFC3	6.124	6.59	6.8	7.3	0.469351	0.434275	0.03508
YAL002W	VPS8	6.134	5.16	6.5	7	-0.971269	0.50958	-1.48085
YAL003W	EFB1	12.655	13.14	11.5	11.6	0.488293	0.039184	0.44911
YAL005C	SSA1	14.206	14.76	11.8	11.7	0.551036	-0.048731	0.59977
YAL007C	ERP2	8.742	7.98	7.9	7.9	-0.76048	0.006236	-0.76672
YAL008W	FUN14	6.967	7.22	6.8	5.8	0.256201	-0.972933	1.22913
YAL009W	SPO7	4.963	2.76	6.6	6.6	-2.20463	-0.080708	-2.12392
YAL010C	MDM10	6.056	6.55	5.7	6.1	0.491032	0.380371	0.11066
YAL011W	SWC3	5.966	6.47	6.3	6.8	0.500142	0.420039	0.0801
YAL012W	CYS3	11.092	11.58	10	9.5	0.486328	-0.499804	0.98613
YAL013W	DEP1	7.431	7.42	7.4	7.9	-0.013664	0.547004	-0.56067
YAL014C	SYN8	5.866	5.45	6.4	7.2	-0.412452	0.858087	-1.27054
YAL015C	NTG1	6.422	6.89	6.7	6.9	0.468113	0.19474	0.27337
YAL016W	TPD3	9.666	8.46	8.7	9	-1.20593	0.318344	-1.52428
YAL017W	PSK1	8.366	6.37	7.8	7.8	-1.99241	-0.023374	-1.96903
YAL019W	FUN30	8.276	7.29	8	8.5	-0.989587	0.516953	-1.50654
YAL020C	ATS1	5.477	6.08	7.1	7.6	0.605385	0.480634	0.12475
YAL021C	CCR4	9.165	9.32	7.5	7.9	0.1523	0.40474	-0.25244
YAL022C	FUN26	7.966	6.49	8.6	8.4	-1.47656	-0.171223	-1.30534
YAL024C	LTE1	6.391	6.49	6.1	6.4	0.100843	0.348908	-0.24807
YAL025C	MAK16	8.715	8.64	8.6	8.9	-0.077661	0.303503	-0.38116
YAL026C	DRS2	8.732	7.15	8.3	8.4	-1.57995	0.10006	-1.68001
YAL028W	FRT2	3.896	3.26	4.9	5.2	-0.631887	0.31307	-0.94496
YAL029C	MYO4	7.967	6.97	8.7	8.8	-0.993673	0.161985	-1.15566
YAL030W	SNC1	6.271	6.81	5.3	5.4	0.539151	0.167231	0.37192
YAL031C	GIP4	6.841	6.01	6.8	7	-0.831926	0.147934	-0.97986
YAL032C	PRP45	7.031	7.86	6.6	6.9	0.824357	0.342527	0.48183
YAL033W	POP5	6.764	7.55	6.8	6.9	0.787151	0.135421	0.65173
YAL034C	FUN19	4.228	4.25	5.3	5.6	0.017533	0.20938	-0.19185
YAL034W-A	MTW1	4.802	5.22	5.1	5.1	0.41504	0.011453	0.40359
YAL035W	FUN12	11.141	12.24	10.4	10.6	1.1	0.19495	0.90505
YAL036C	RBG1	8.715	9.48	8.6	8.9	0.766088	0.285267	0.48082
YAL038W	CDC19	15.989	16.86	13.7	14	0.870638	0.253827	0.61681
YAL039C	CYC3	7.821	7.72	8.1	7.7	-0.099325	-0.323029	0.2237
YAL040C	CLN3	7.34	5.46	6.8	7.3	-1.88444	0.462251	-2.34669
YAL041W	CDC24	7.781	6.42	8.2	8.5	-1.36152	0.328806	-1.69033
YAL042W	ERV46	9.593	7.6	10	9.4	-1.98851	-0.585377	-1.40313
YAL043C	PTA1	8.338	8.7	7.7	8	0.363792	0.295619	0.06817
YAL044C	GCV3	9.652	9.65	9.3	8.3	-0.003553	-0.984322	0.98077
YAL044W-A		6.49	7.37	5.8	6.7	0.875098	0.871875	0.00322
YAL046C	AIM1	6.397	7.22	6.1	6.4	0.823959	0.254109	0.56985
YAL047C	SPC72	5.556	5.16	5.9	6.3	-0.393465	0.462462	-0.85593
YAL048C	GEM1	5.67	6.23	6.2	6.2	0.555445	0.055116	0.50033
YAL049C	AIM2	7.45	7.34	7.8	7.1	-0.113163	-0.700789	0.58763
YAL051W	OAF1	6.672	7.14	6.9	7.2	0.468876	0.242557	0.22632
YAL053W	FLC2	9.434	9.71	8.8	9	0.276703	0.270645	0.00606
YAL054C	ACS1	4.277	5.66	4.8	5.3	1.38482	0.450687	0.93414
YAL055W	PEX22	5.056	5.05	5.4	5.4	-0.000813	-0.017343	0.01653
YAL056W	GPB2	7.22	6.06	8.3	8.6	-1.15945	0.236294	-1.39574
YAL058W	CNE1	6.361	5.99	7.2	7.2	-0.371402	-0.039264	-0.33214
YAL059W	ECM1	7.755	8.28	8.6	8.2	0.527396	-0.434704	0.9621
YAL060W	BDH1	7.97	8.02	8.3	8	0.04667	-0.255824	0.30249
YAL061W	BDH2	8.784	7.36	7.5	5.5	-1.42297	-1.92366	0.5007
YAL063C	FLO9	4.475	5.9	6	6.2	1.4207	0.15878	1.26192
YAR002C-A	ERP1	9.288	9.69	8.6	8.6	0.399507	0.052658	0.34685
YAR002W	NUP60	7.903	7.79	8.3	8.6	-0.114084	0.363895	-0.47798
YAR003W	SWD1	5.929	5.06	7.5	7.2	-0.873628	-0.262838	-0.61079
YAR007C	RFA1	8.339	8.93	8.2	7.7	0.589157	-0.50931	1.09847
YAR008W	SEN34	5.201	5.83	6.2	6.2	0.624181	-0.03321	0.65739
YAR009C		12.027	12.52	13.3	13.4	0.491075	0.069666	0.42141
YAR010C		13.06	12.74	11.6	11.8	-0.321428	0.1746	-0.49603
YAR014C	BUD14	8.071	6.34	8.5	8.9	-1.7292	0.353587	-2.08279
YAR015W	ADE1	10.66	10.7	10	9.6	0.042406	-0.310061	0.35247
YAR018C	KIN3	6.576	7.22	7.1	6.9	0.639354	-0.206983	0.84634
YAR019C	CDC15	6.529	6.19	5.8	6.4	-0.343165	0.610057	-0.95322
YAR027W	UIP3	7.501	7.82	7.3	7	0.318845	-0.356319	0.67516
YAR028W		6.999	7.54	6.8	6.6	0.537322	-0.19645	0.73377
YAR031W	PRM9	6.085	5.34	5.7	5.8	-0.748229	0.091644	-0.83987
YAR033W	MST28	5.663	3.81	5.8	6.1	-1.85057	0.204757	-2.05533
YAR042W	SWH1	7.607	7.98	7.5	7.4	0.376253	-0.07223	0.44848
YAR050W	FLO1	4.779	6.19	6.2	6.2	1.41374	0.068933	1.34481
YAR071W	PHO11	5.959	5.15	6.2	6	-0.805867	-0.214916	-0.59095
YBL001C	ECM15	8.353	8.8	8.2	7.6	0.442879	-0.529296	0.97218
YBL002W	HTB2	9.934	10.84	9.4	9.4	0.906558	0.022307	0.88425
YBL003C	HTA2	10.412	11.38	10.7	10.7	0.972166	0.012635	0.95953
YBL004W	UTP20	9.618	8.79	9.2	9.5	-0.830211	0.352705	-1.18292
YBL005W	PDR3	5.398	5.15	6.5	6.8	-0.245069	0.306257	-0.55133
YBL006C	LDB7	7.252	7.09	8.2	8.2	-0.165701	0.051069	-0.21677
YBL009W	ALK2	6.75	6.63	7.1	7.3	-0.114813	0.148406	-0.26322
YBL010C		4.683	6.43	6.1	5.7	1.7495	-0.412789	2.16229
YBL013W	FMT1	5.101	5.16	4.8	5.1	0.058064	0.278405	-0.22034
YBL014C	RRN6	5.726	5.03	7.9	8.2	-0.693637	0.271063	-0.9647
YBL015W	ACH1	8.2	8.22	7.1	6.8	0.019149	-0.275212	0.29436
YBL016W	FUS3	8.046	8.22	8.5	8.2	0.176202	-0.265446	0.44165
YBL017C	PEP1	9.782	7.8	9.1	9.2	-1.97895	0.06474	-2.04369
YBL018C	POP8	5.944	6.1	7.6	7.2	0.152592	-0.348265	0.50086
YBL019W	APN2	5.278	5.5	6	6.1	0.226292	0.117115	0.10918
YBL020W	RFT1	7.507	4.86	7.2	7.6	-2.65219	0.341915	-2.9941
YBL021C	HAP3	4.92	5.02	6	5.7	0.102971	-0.300212	0.40318
YBL022C	PIM1	9.275	8.02	9.3	8.9	-1.2582	-0.360237	-0.89796
YBL023C	MCM2	7.887	8.5	8	7.8	0.611298	-0.255578	0.86688
YBL024W	NCL1	10.148	11.3	9.4	9.5	1.15321	0.169252	0.98395
YBL025W	RRN10	4.661	5.87	5.9	5.4	1.2128	-0.508792	1.72159
YBL026W	LSM2	7.222	7.89	6.5	6.5	0.670572	0.070205	0.60037
YBL027W	RPL19B	12.6	13.48	12.2	12.5	0.87642	0.324303	0.55212
YBL028C		7.367	8.5	7.7	7.6	1.13346	-0.132735	1.26619
YBL029C-A		5.923	6.26	5.2	5.3	0.342065	0.172786	0.16928
YBL030C	PET9	11.158	9.18	9.7	9	-1.98182	-0.701447	-1.28037
YBL031W	SHE1	4.639	4.94	5.6	5	0.298888	-0.601037	0.89992
YBL032W	HEK2	8.856	7.16	8.6	8.1	-1.69226	-0.459636	-1.23262
YBL033C	RIB1	7.725	8.86	8.1	7.5	1.13068	-0.585943	1.71662
YBL035C	POL12	6.775	6.99	6.5	6.9	0.21354	0.47046	-0.25692
YBL036C		7.883	8.61	7.7	7.5	0.726514	-0.185278	0.91179
YBL037W	APL3	7.82	8	7.1	7.3	0.175917	0.198815	-0.0229
YBL038W	MRPL16	7.33	7.54	7.8	7.5	0.213287	-0.334691	0.54798
YBL039C	URA7	10.837	11.74	10.3	10.6	0.904075	0.249223	0.65485
YBL040C	ERD2	7.942	8.46	7.7	7.9	0.517712	0.219421	0.29829
YBL041W	PRE7	9.349	9.07	9	8.7	-0.280284	-0.320998	0.04071
YBL042C	FUI1	9.475	9.13	9.5	9.9	-0.344496	0.393436	-0.73793
YBL045C	COR1	9.895	9.67	9.6	9.3	-0.222707	-0.33975	0.11704
YBL046W	PSY4	6.821	7.39	6.9	6.8	0.570232	-0.042384	0.61262
YBL047C	EDE1	10.305	8.49	9.2	9.2	-1.81419	-0.018387	-1.7958
YBL050W	SEC17	8.459	8.12	8.4	8.2	-0.335763	-0.21972	-0.11604
YBL051C	PIN4	7.988	6.94	6.7	7	-1.04738	0.360952	-1.40833
YBL052C	SAS3	5.415	4.2	7.2	7.7	-1.217	0.465086	-1.68208
YBL054W	TOD6	7.782	6.88	8.4	8.8	-0.898395	0.324323	-1.22272
YBL055C		7.749	7.75	8.2	8.3	-0.003599	0.072696	-0.0763
YBL056W	PTC3	8.976	8.58	9.2	9.2	-0.392866	-0.057118	-0.33575
YBL057C	PTH2	7.545	8	7.8	7.8	0.457429	-0.014045	0.47147
YBL058W	SHP1	9.393	9.35	8.5	8.3	-0.046559	-0.227562	0.181
YBL059C-A	CMC2	5.609	6.76	5.7	5.7	1.15064	0.003506	1.14714
YBL059W		5.487	6.04	5.2	5.2	0.55246	-0.010165	0.56263
YBL060W	YEL1	5.522	6.25	7.1	7.2	0.729828	0.058012	0.67182
YBL061C	SKT5	7.972	7.44	8.3	8.4	-0.533468	0.045204	-0.57867
YBL063W	KIP1	5.876	5.96	5.6	5.6	0.083662	0.012714	0.07095
YBL064C	PRX1	8.14	8.49	7.7	7.2	0.354431	-0.514452	0.86888
YBL066C	SEF1	5.968	4.1	6	6.3	-1.86407	0.241679	-2.10575
YBL067C	UBP13	6.953	2.75	7.7	7.9	-4.20112	0.238347	-4.43947
YBL068W	PRS4	7.975	8.69	7.9	8.1	0.713602	0.218462	0.49514
YBL069W	AST1	7.228	7.43	7.2	7.1	0.199018	-0.06468	0.2637
YBL071W-A	KTI11	6.32	7.56	5.6	6.4	1.24064	0.884704	0.35593
YBL072C	RPS8A	13.326	14.12	13.6	13.5	0.797336	-0.128227	0.92556
YBL074C	AAR2	5.035	4.75	4.8	5.2	-0.280338	0.399255	-0.67959
YBL075C	SSA3	1.539	5.47	6.1	6.5	3.92612	0.416695	3.50942
YBL076C	ILS1	11.994	12.74	11	11.1	0.746157	0.049951	0.69621
YBL079W	NUP170	8.767	7.86	8.3	8.6	-0.902706	0.287006	-1.18971
YBL080C	PET112	5.606	5.63	5.9	5.8	0.021879	-0.04105	0.06293
YBL081W		7.125	5.79	7	7.2	-1.3389	0.171098	-1.51
YBL082C	ALG3	7.164	6.46	7.7	7.9	-0.704308	0.191978	-0.89629
YBL084C	CDC27	6.198	6.19	6.8	6.9	-0.006176	0.13193	-0.13811
YBL085W	BOI1	7.147	6.28	8	8.2	-0.865559	0.272075	-1.13763
YBL086C		6.071	6.69	5.7	6.4	0.621339	0.738609	-0.11727
YBL087C	RPL23A	11.845	12.19	11.4	11.3	0.346235	-0.038698	0.38493
YBL088C	TEL1	5.388	4.68	6.5	6.9	-0.711378	0.384264	-1.09564
YBL089W	AVT5	6.09	6.4	6.4	6.8	0.308279	0.421869	-0.11359
YBL090W	MRP21	6.317	6.65	6.2	6.2	0.328917	-0.008574	0.33749
YBL091C	MAP2	9.407	9.85	8.5	8.7	0.44095	0.175279	0.26567
YBL091C-A	SCS22	5.143	6.47	4.6	5.9	1.32452	1.30667	0.01785
YBL092W	RPL32	13.011	13.72	11.8	12.3	0.714038	0.407497	0.30654
YBL093C	ROX3	7.837	6.88	8.5	8.2	-0.956776	-0.305513	-0.65126
YBL095W		5.783	6.31	6.3	6.6	0.524212	0.29729	0.22692
YBL097W	BRN1	6.515	6.76	5.8	6.5	0.242565	0.727175	-0.48461
YBL098W	BNA4	6.579	5.42	6.9	5.9	-1.15777	-1.06471	-0.09306
YBL099W	ATP1	11.763	10.07	10.1	9.8	-1.69653	-0.330551	-1.36598
YBL101C	ECM21	8.707	7.54	7.5	6.7	-1.17002	-0.852129	-0.3179
YBL102W	SFT2	7.367	5.15	7.6	7.5	-2.21472	-0.117054	-2.09767
YBL103C	RTG3	6.25	6.13	7	7.1	-0.120798	0.083863	-0.20466
YBL104C		7.216	7.01	7.4	7.6	-0.20162	0.147089	-0.34871
YBL105C	PKC1	7.747	6.34	7.8	8.5	-1.41099	0.663536	-2.07452
YBL106C	SRO77	5.35	4.66	6.4	5.9	-0.693124	-0.507493	-0.18563
YBL107C		6.289	6.43	6.5	6.3	0.143698	-0.161143	0.30484
YBL111C		7.934	8.06	9.3	9.1	0.12981	-0.250509	0.38032
YBR001C	NTH2	7.305	6.22	7.1	7.4	-1.08743	0.272607	-1.36003
YBR002C	RER2	6.907	7.38	7.7	8.2	0.471457	0.524534	-0.05308
YBR003W	COQ1	8.041	7	8	7.6	-1.0396	-0.341356	-0.69825
YBR004C	GPI18	5.943	5.86	6.5	6.7	-0.08298	0.169293	-0.25227
YBR005W	RCR1	6.703	8.19	6.6	6.3	1.48568	-0.311715	1.79739
YBR006W	UGA2	8.32	7.12	7.8	6.8	-1.20048	-0.9508	-0.24968
YBR007C	DSF2	6.543	6.89	6.6	7	0.346868	0.416423	-0.06955
YBR008C	FLR1	0.372	3.26	7	7.4	2.88405	0.442678	2.44137
YBR009C	HHF1	10.488	11.37	9.8	10.3	0.884638	0.582643	0.30199
YBR010W	HHT1	11.502	12.48	10.2	10.7	0.976918	0.509811	0.46711
YBR011C	IPP1	12.122	12.97	10.1	10.4	0.844091	0.312822	0.53127
YBR014C	GRX7	7.995	8.22	7.9	7.2	0.221383	-0.660992	0.88238
YBR015C	MNN2	9.49	7.63	8.4	8.3	-1.86296	-0.104305	-1.75866
YBR016W		8.44	8.87	6.4	6	0.426499	-0.340747	0.76725
YBR017C	KAP104	9.122	9.19	8.8	8.9	0.071524	0.052585	0.01894
YBR021W	FUR4	7.532	7.15	7.5	7.7	-0.379376	0.209833	-0.58921
YBR022W	POA1	6.066	5.8	5.8	5.8	-0.266002	0.031338	-0.29734
YBR023C	CHS3	8.561	6.56	9.1	9.2	-2.00149	0.088273	-2.08976
YBR024W	SCO2	6.756	6.08	6.7	6.6	-0.674255	-0.100844	-0.57341
YBR025C	OLA1	11.309	11.8	10	10.1	0.494612	0.172827	0.32179
YBR026C	ETR1	8.647	8.35	7.6	6.9	-0.297729	-0.716406	0.41868
YBR028C		6.836	5.7	7.3	7.3	-1.13933	-0.017514	-1.12182
YBR029C	CDS1	9.139	9.1	9.1	8.8	-0.037669	-0.320747	0.28308
YBR030W	RKM3	6.842	7.2	8.2	8.6	0.356393	0.382896	-0.0265
YBR031W	RPL4A	13.447	14.29	12.6	13.2	0.841389	0.605695	0.23569
YBR034C	HMT1	10.465	10.85	10.1	10	0.386524	-0.09869	0.48521
YBR035C	PDX3	9.253	9.76	8.4	7.6	0.506092	-0.768706	1.2748
YBR036C	CSG2	9.205	9.78	8.7	8.7	0.57053	0.053147	0.51738
YBR037C	SCO1	6.759	6.88	6.7	6.2	0.12563	-0.418997	0.54463
YBR038W	CHS2	9.15	7.67	7.9	8.3	-1.48473	0.331781	-1.81651
YBR039W	ATP3	9.744	9.75	8.8	8.5	0.009765	-0.342228	0.35199
YBR041W	FAT1	8.602	7.42	8.3	7.8	-1.18565	-0.483401	-0.70225
YBR042C	CST26	7.37	6.94	8.1	7.4	-0.434506	-0.681919	0.24741
YBR043C	QDR3	4.29	4.54	8	8	0.245886	0.0763	0.16959
YBR044C	TCM62	6.078	5.14	6.9	6.9	-0.942516	-0.056488	-0.88603
YBR046C	ZTA1	7.278	7.28	7	6.1	-0.00043	-0.910361	0.90993
YBR048W	RPS11B	12.21	12.81	11.5	11.7	0.605022	0.271135	0.33389
YBR049C	REB1	7.851	7.2	7.2	7.6	-0.649168	0.412351	-1.06152
YBR052C	RFS1	8.516	8.16	8.3	7.6	-0.35925	-0.648566	0.28932
YBR053C		7.764	8.56	7.7	7	0.795098	-0.628228	1.42333
YBR054W	YRO2	10.051	9.42	9.2	8.8	-0.628263	-0.410431	-0.21783
YBR055C	PRP6	6.792	7.68	6.9	7.6	0.890179	0.66099	0.22919
YBR056W		8.538	8.28	8	7.7	-0.256691	-0.258927	0.00224
YBR057C	MUM2	6.796	5.04	7.2	7.3	-1.75861	0.185327	-1.94394
YBR058C	UBP14	8.045	7.87	8.2	8.3	-0.177451	0.085651	-0.2631
YBR059C	AKL1	8.436	6.18	7.7	7.8	-2.25917	0.074084	-2.33326
YBR060C	ORC2	6.197	5.91	7.2	7.4	-0.28506	0.155574	-0.44063
YBR061C	TRM7	7.49	8.13	8.1	7.7	0.636306	-0.406851	1.04316
YBR062C		5.503	5.95	5.7	5.5	0.447618	-0.147592	0.59521
YBR063C		-0.625	1.76	6.7	6.8	2.38571	0.058799	2.32691
YBR065C	ECM2	5.728	6.73	6.3	6.5	1.0035	0.239848	0.76366
YBR066C	NRG2	5.96	6.9	6.3	6.4	0.942956	0.039936	0.90302
YBR067C	TIP1	12.028	12.91	11.3	11.4	0.883431	0.047159	0.83627
YBR068C	BAP2	9.432	8.48	9.1	9.9	-0.955804	0.760772	-1.71658
YBR069C	TAT1	9.879	9.35	9.9	10.2	-0.530871	0.217277	-0.74815
YBR070C	ALG14	5.372	5.26	6	6.3	-0.11339	0.394721	-0.50811
YBR071W		6.254	6.8	6.3	6.1	0.546864	-0.192542	0.73941
YBR072W	HSP26	7.231	8.62	5.3	5.5	1.38962	0.204626	1.18499
YBR073W	RDH54	8.007	7.13	8.3	8.1	-0.881696	-0.215421	-0.66627
YBR074W		8.407	9.1	7.7	7.8	0.691851	0.088865	0.60299
YBR077C	SLM4	5.896	7.58	6.3	6.5	1.68508	0.177989	1.5071
YBR078W	ECM33	12.408	12.74	11.5	11.6	0.332576	0.068745	0.26383
YBR079C	RPG1	11.286	11.59	10.2	10.5	0.303225	0.292042	0.01118
YBR080C	SEC18	9.376	9.41	8.2	8.1	0.031747	-0.124852	0.1566
YBR081C	SPT7	7.782	7.25	7.3	7.9	-0.531685	0.572324	-1.10401
YBR082C	UBC4	10.278	10.83	9.3	9	0.553462	-0.247255	0.80072
YBR083W	TEC1	7.059	7.49	6.6	6.9	0.428888	0.281277	0.14761
YBR084C-A	RPL19A	12.37	13.27	11.8	12.1	0.897939	0.333166	0.56477
YBR084W	MIS1	10.461	8.65	10.2	10.3	-1.81193	0.118844	-1.93077
YBR085C-A		8.744	8.98	8.6	7.8	0.236267	-0.783664	1.01993
YBR085W	AAC3	3.733	3.26	5	5.1	-0.470886	0.108745	-0.57963
YBR086C	IST2	9.594	7.28	9	8.5	-2.3176	-0.454561	-1.86304
YBR087W	RFC5	7.027	7.58	7.6	7.3	0.551051	-0.229227	0.78028
YBR088C	POL30	8.748	9.24	7.8	7.4	0.493129	-0.415368	0.9085
YBR091C	TIM12	6.451	7.26	5.6	6	0.813334	0.342959	0.47038
YBR092C	PHO3	11.257	11.49	9.9	9.6	0.231874	-0.282287	0.51416
YBR093C	PHO5	8.933	9.11	7.3	7.3	0.175201	0.049945	0.12526
YBR094W	PBY1	7.483	7.03	7.6	7.3	-0.449676	-0.278551	-0.17112
YBR095C	RXT2	6.741	6.82	6.6	7.4	0.083645	0.774693	-0.69105
YBR096W		8.323	8.69	8.2	8.1	0.369928	-0.004216	0.37414
YBR097W	VPS15	6.634	5.74	6.7	7.3	-0.891857	0.568114	-1.45997
YBR098W	MMS4	4.787	4.23	5.4	5.4	-0.560253	0.05527	-0.61552
YBR101C	FES1	8.086	9.01	7.9	7.6	0.92346	-0.239732	1.16319
YBR102C	EXO84	7.226	6.14	7.2	7.4	-1.08935	0.156229	-1.24558
YBR103W	SIF2	6.762	5.99	7.6	7.9	-0.768907	0.279354	-1.04826
YBR104W	YMC2	7.774	6.66	8.5	8.4	-1.11791	-0.120963	-0.99694
YBR105C	VID24	8.682	8.82	8	8.1	0.133108	0.039823	0.09329
YBR106W	PHO88	10.895	10.47	10.7	10.3	-0.425996	-0.402928	-0.02307
YBR107C	IML3	3.349	3.14	4.9	5.3	-0.204791	0.355849	-0.56064
YBR108W	AIM3	7.594	7.28	6.2	6.3	-0.318146	0.122465	-0.44061
YBR109C	CMD1	9.556	10.34	8.2	8.3	0.783463	0.154748	0.62871
YBR110W	ALG1	7.271	6.13	7.5	7.5	-1.14383	0.022085	-1.16592
YBR111C	YSA1	9.168	9.64	8.6	8.3	0.468045	-0.364056	0.8321
YBR111W-A	SUS1	5.85	6.12	5.9	5.2	0.273321	-0.699238	0.97256
YBR112C	CYC8	9.085	8.13	8.2	8.5	-0.950382	0.349579	-1.29996
YBR114W	RAD16	7.561	7.98	7.7	8.1	0.417594	0.445188	-0.02759
YBR117C	TKL2	6.093	4.61	5.2	4.8	-1.48458	-0.339059	-1.14552
YBR118W	TEF2	16.847	17.86	15.6	15.8	1.01215	0.240402	0.77175
YBR120C	CBP6	5.49	5.48	6.1	5.1	-0.008418	-0.950576	0.94216
YBR121C	GRS1	11.677	12.18	11	11.2	0.50131	0.189182	0.31213
YBR122C	MRPL36	7.044	7.31	7.4	7.1	0.27053	-0.359483	0.63001
YBR123C	TFC1	7.012	6.7	6.9	7.5	-0.314716	0.54075	-0.85547
YBR125C	PTC4	6.787	5.26	7.2	7.4	-1.52652	0.156617	-1.68313
YBR126C	TPS1	10.692	10.04	8	7.6	-0.650648	-0.461911	-0.18874
YBR127C	VMA2	12.323	11.97	10.2	10.3	-0.357434	0.060696	-0.41813
YBR129C	OPY1	5.433	4.36	6.6	6.8	-1.07004	0.177428	-1.24747
YBR130C	SHE3	7.308	6.75	7.2	7.9	-0.556413	0.676187	-1.2326
YBR131W	CCZ1	6.402	7.13	6.3	6.6	0.729426	0.265877	0.46355
YBR132C	AGP2	8.159	7.4	5	4.9	-0.758602	-0.108571	-0.65003
YBR133C	HSL7	7.155	5.87	7.7	8.2	-1.28861	0.512594	-1.80121
YBR135W	CKS1	7.618	5.78	6.7	6.4	-1.8424	-0.360034	-1.48237
YBR136W	MEC1	6.728	6.89	6.8	6.7	0.165161	-0.137256	0.30242
YBR137W		7.006	7	6.9	6.7	-0.003083	-0.21271	0.20963
YBR138C		6.117	6.5	6	6	0.387546	0.000898	0.38665
YBR139W		9.294	9.78	7.5	7.3	0.48417	-0.112053	0.59622
YBR140C	IRA1	8.379	6.79	8.3	8.2	-1.58807	-0.160575	-1.4275
YBR141C		6.499	7.24	6.7	6.8	0.743319	0.047551	0.69577
YBR142W	MAK5	8.816	8.45	8.9	8.9	-0.363966	-0.050126	-0.31384
YBR143C	SUP45	10.659	11.27	10.2	10.3	0.607404	0.079468	0.52794
YBR145W	ADH5	7.689	5.5	7.5	5.7	-2.18982	-1.79747	-0.39235
YBR146W	MRPS9	7.675	5.85	7.6	7.5	-1.82181	-0.148249	-1.67356
YBR149W	ARA1	10.279	10.13	9.5	8.6	-0.146131	-0.844696	0.69857
YBR150C	TBS1	5.731	5.57	6.1	5.9	-0.161073	-0.257544	0.09647
YBR151W	APD1	7.257	4.77	8.2	7.4	-2.49106	-0.767871	-1.72319
YBR152W	SPP381	4.414	4.26	4.6	5	-0.154686	0.393245	-0.54793
YBR153W	RIB7	5.083	6.02	6.5	6.9	0.938973	0.336709	0.60226
YBR154C	RPB5	8.824	8.94	8.7	8.6	0.113699	-0.091129	0.20483
YBR155W	CNS1	7.879	7.83	7.5	7.6	-0.044235	0.128732	-0.17297
YBR156C	SLI15	4.866	5.14	5.3	5.7	0.278232	0.367443	-0.08921
YBR157C	ICS2	4.71	3.81	5.9	5.6	-0.903927	-0.307226	-0.5967
YBR158W	AMN1	8.077	8.29	9.3	9.4	0.211081	0.051546	0.15953
YBR159W	IFA38	9.333	9.35	9	8.9	0.015089	-0.050572	0.06566
YBR161W	CSH1	6.737	6.71	6.6	6.7	-0.022674	0.14723	-0.1699
YBR162C	TOS1	11.571	11.23	10.5	10.7	-0.344679	0.192825	-0.5375
YBR162W-A	YSY6	6.665	7.18	6.4	7	0.517554	0.676649	-0.15909
YBR163W	EXO5	5.484	4.56	7.2	7.3	-0.926254	0.023054	-0.94931
YBR164C	ARL1	8.295	8.6	8.1	8.5	0.305372	0.387648	-0.08228
YBR165W	UBS1	6.374	6.3	6.8	6.7	-0.069957	-0.073307	0.00335
YBR166C	TYR1	7.867	8.38	7.6	7.7	0.51157	0.114371	0.3972
YBR167C	POP7	4.967	5.64	5.7	6	0.67185	0.283469	0.38838
YBR168W	PEX32	5.359	3.39	5.7	6	-1.97055	0.331714	-2.30226
YBR169C	SSE2	9.596	9.56	7.9	7.3	-0.03608	-0.628738	0.59266
YBR170C	NPL4	8.359	8.68	8.3	7.8	0.320278	-0.407466	0.72774
YBR171W	SEC66	7.714	8.6	7.6	7.5	0.890068	-0.083358	0.97343
YBR172C	SMY2	7.85	6.75	7.9	8.3	-1.10177	0.342124	-1.44389
YBR173C	UMP1	8.193	8.75	7.8	7.1	0.556871	-0.709078	1.26595
YBR175W	SWD3	5.788	6.81	7.3	7.6	1.02106	0.285569	0.73549
YBR176W	ECM31	6.634	6.75	6.4	6	0.119643	-0.337477	0.45712
YBR177C	EHT1	9.535	10.15	8.8	8.7	0.617162	-0.032041	0.6492
YBR179C	FZO1	7.23	6.35	7.2	7.4	-0.878178	0.267447	-1.14562
YBR181C	RPS6B	13.272	14.03	13	13.1	0.757239	0.078966	0.67827
YBR182C	SMP1	4.832	7.48	5	6.2	2.64881	1.23733	1.41148
YBR183W	YPC1	6.661	6.65	6.4	5.8	-0.008301	-0.624407	0.61611
YBR185C	MBA1	6.355	6.74	6.4	6.1	0.38675	-0.352482	0.73923
YBR187W	GDT1	8.495	6.3	8.9	8.9	-2.19418	0.062686	-2.25687
YBR188C	NTC20	5.227	4.87	5.4	5.7	-0.361321	0.300473	-0.66179
YBR189W	RPS9B	12.964	13.61	12.6	12.5	0.65122	-0.075336	0.72656
YBR191W	RPL21A	12.51	13.17	12.4	12.3	0.658691	-0.137845	0.79654
YBR192W	RIM2	6.908	4.64	6.8	7.1	-2.27115	0.238705	-2.50985
YBR193C	MED8	6.335	6.64	6.1	6.7	0.305331	0.554477	-0.24915
YBR194W	AIM4	4.213	4.72	5.3	5.7	0.505851	0.416128	0.08972
YBR195C	MSI1	6.383	7	7.2	6.9	0.615649	-0.277633	0.89328
YBR197C		5.161	5.26	5.4	5.5	0.102233	0.03412	0.06811
YBR198C	TAF5	8.209	7.95	7.7	8.3	-0.255915	0.558743	-0.81466
YBR199W	KTR4	9.079	8.19	9	8.9	-0.891639	-0.079753	-0.81189
YBR200W	BEM1	7.746	7.83	7.7	7.3	0.086102	-0.374243	0.46034
YBR201W	DER1	5.436	3.91	6	6.3	-1.52591	0.252292	-1.77821
YBR202W	MCM7	8.501	8.17	8.1	8.2	-0.330465	0.111474	-0.44194
YBR203W	COS111	6.503	5.2	5.6	6.3	-1.30304	0.674099	-1.97714
YBR204C		6.617	5.88	6.5	6.8	-0.738791	0.232185	-0.97098
YBR205W	KTR3	9.174	9.21	8.6	8.3	0.038352	-0.312102	0.35045
YBR207W	FTH1	7.711	7.25	8	7.7	-0.457948	-0.313868	-0.14408
YBR208C	DUR1,2	6.975	7.72	7	7.4	0.747147	0.465998	0.28115
YBR210W	ERV15	5.772	5.41	5.9	6.1	-0.365027	0.19975	-0.56478
YBR211C	AME1	5.708	3.63	6.4	7	-2.07454	0.582134	-2.65668
YBR212W	NGR1	7.933	5.68	7.5	7.4	-2.25288	-0.164597	-2.08829
YBR213W	MET8	5.863	5.93	5.7	5.6	0.068437	-0.054138	0.12257
YBR214W	SDS24	8.538	8.45	7.1	6.9	-0.092378	-0.193096	0.10072
YBR215W	HPC2	6.168	6.19	6.7	6.9	0.023485	0.19067	-0.16719
YBR216C	YBP1	7.295	7.84	6.9	7.1	0.539983	0.194251	0.34573
YBR217W	ATG12	2.969	3.05	5.5	5.7	0.083313	0.277131	-0.19382
YBR218C	PYC2	10.94	9.44	9.9	9.6	-1.50391	-0.295564	-1.20835
YBR221C	PDB1	10.709	9.15	10.4	10.1	-1.56409	-0.383332	-1.18076
YBR222C	PCS60	8.31	7.95	8.1	7.2	-0.355859	-0.907142	0.55128
YBR223C	TDP1	5.491	5.76	5.6	5.7	0.26507	0.159381	0.10569
YBR225W		6.915	6.14	6.5	6.3	-0.770022	-0.207991	-0.56203
YBR227C	MCX1	7.362	7.68	7.4	7.3	0.314864	-0.080179	0.39504
YBR228W	SLX1	5.717	5.81	5.9	6.3	0.094583	0.457811	-0.36323
YBR229C	ROT2	8.61	8.35	8	7.8	-0.262985	-0.171797	-0.09119
YBR230C	OM14	8.678	8.05	8.2	6.5	-0.628919	-1.74291	1.11399
YBR230W-A		5.384	7.34	4.5	5.7	1.9575	1.17792	0.77959
YBR231C	SWC5	6.491	7.5	7.1	6.6	1.00893	-0.491901	1.50083
YBR233W	PBP2	6.677	7.01	6.4	6.5	0.328844	0.172827	0.15602
YBR233W-A	DAD3	5.202	5.7	5.2	5.3	0.496807	0.088258	0.40855
YBR234C	ARC40	8.952	9.82	8	8.2	0.872072	0.167115	0.70496
YBR235W		7.539	6.86	7.7	7.7	-0.67483	0.001669	-0.6765
YBR236C	ABD1	7.117	7.36	7.6	7.6	0.239691	-0.022298	0.26199
YBR237W	PRP5	5.829	7.12	7.2	7.4	1.2896	0.171958	1.11765
YBR238C		8.767	8.86	7.6	7.9	0.097934	0.328583	-0.23065
YBR239C	ERT1	4.999	4.9	5.5	6	-0.098061	0.405509	-0.50357
YBR241C		7.46	7.98	6.9	6.5	0.522532	-0.330084	0.85262
YBR242W		6.924	6.63	7.6	7.3	-0.292983	-0.26759	-0.02539
YBR243C	ALG7	7.567	7.18	7.1	6.9	-0.384717	-0.160405	-0.22431
YBR244W	GPX2	7.544	7.94	7	6.9	0.390995	-0.041066	0.43206
YBR245C	ISW1	9.037	9.41	7.6	7.9	0.369044	0.242699	0.12635
YBR246W	RRT2	6.87	6.5	7.4	7.8	-0.371797	0.349255	-0.72105
YBR247C	ENP1	8.968	9.65	8.1	8.5	0.680766	0.411341	0.26943
YBR248C	HIS7	9.222	9.22	8.8	8.5	0.002559	-0.378626	0.38118
YBR249C	ARO4	11.146	11.74	10.5	10.3	0.592651	-0.24922	0.84187
YBR251W	MRPS5	7.228	7.45	7.2	6.9	0.225512	-0.32186	0.54737
YBR252W	DUT1	7.97	9.05	8.4	7.9	1.0831	-0.526975	1.61008
YBR253W	SRB6	5.37	5.84	6.2	6.5	0.470283	0.23781	0.23247
YBR254C	TRS20	6.421	6.83	6.6	6.2	0.410085	-0.404914	0.815
YBR255C-A		4.805	5.43	5.5	5.4	0.628481	-0.090181	0.71866
YBR255W	MTC4	5.538	6.33	6.6	6.7	0.79485	0.072339	0.72251
YBR256C	RIB5	7.806	8.01	8.1	8.1	0.201393	-0.020096	0.22149
YBR257W	POP4	6.698	7.37	6.7	6.8	0.669587	0.14016	0.52943
YBR258C	SHG1	5.091	5.97	4.6	5	0.879162	0.389622	0.48954
YBR259W		5.325	4.67	6.3	6.5	-0.653758	0.201524	-0.85528
YBR260C	RGD1	7.521	8.04	6.9	6.9	0.514757	-0.004889	0.51965
YBR261C	TAE1	7.767	8.62	7.5	7.5	0.854187	0.027463	0.82672
YBR262C	AIM5	6.132	5.98	6.2	6.6	-0.151261	0.366982	-0.51824
YBR263W	SHM1	10.295	9.29	8.6	8.5	-1.00793	-0.051664	-0.95627
YBR264C	YPT10	6.195	6.17	6	6.1	-0.025268	0.101067	-0.12633
YBR265W	TSC10	7.793	8.14	7.9	7.8	0.34391	-0.097049	0.44096
YBR267W	REI1	8.818	9.39	8.5	8.8	0.576021	0.208387	0.36763
YBR268W	MRPL37	6.582	7.03	6.2	6.8	0.446593	0.615028	-0.16843
YBR269C	FMP21	7.4	7.65	6.6	6.2	0.248572	-0.43344	0.68201
YBR270C	BIT2	3.504	3.19	6.1	6.3	-0.309603	0.193498	-0.5031
YBR271W		6.872	6.36	7.7	7.7	-0.506859	-0.000194	-0.50666
YBR272C	HSM3	7.223	7.56	6.8	6.6	0.336193	-0.150915	0.48711
YBR273C	UBX7	7.753	8.21	7.7	7.4	0.459015	-0.25444	0.71345
YBR274W	CHK1	5.454	4.71	7.1	7.2	-0.74731	0.050141	-0.79745
YBR275C	RIF1	7.306	6.27	6.6	7.1	-1.03973	0.462326	-1.50205
YBR276C	PPS1	5.884	4.44	8.2	8.1	-1.44426	-0.131621	-1.31263
YBR278W	DPB3	5.872	6.01	6.6	6.5	0.134858	-0.059262	0.19412
YBR279W	PAF1	8.025	8.7	8	7.9	0.673105	-0.165995	0.8391
YBR280C	SAF1	7.031	6.74	6.1	5.4	-0.29361	-0.731415	0.4378
YBR281C	DUG2	7.216	6.94	6.9	6.9	-0.272156	-0.016706	-0.25545
YBR282W	MRPL27	6.064	5.79	5.9	6	-0.270912	0.085191	-0.3561
YBR283C	SSH1	10.362	8.06	10	9.8	-2.30007	-0.221434	-2.07863
YBR286W	APE3	12.289	12.66	11.5	11	0.372206	-0.495926	0.86813
YBR287W		8.853	8.75	8.5	8.2	-0.103596	-0.250346	0.14675
YBR288C	APM3	7.391	7.29	7.8	7.5	-0.098713	-0.240112	0.1414
YBR289W	SNF5	7.568	8.42	7.5	6.9	0.84738	-0.5859	1.43328
YBR290W	BSD2	6.787	7.42	7.4	6.9	0.637202	-0.510143	1.14735
YBR291C	CTP1	4.833	5.52	6.2	6.3	0.684048	0.158933	0.52512
YBR293W	VBA2	5.644	5.71	7.3	7.8	0.061551	0.500884	-0.43933
YBR295W	PCA1	4.962	4.97	6.5	6.9	0.011847	0.385335	-0.37349
YBR297W	MAL33	5.443	5.37	5.8	6.3	-0.076729	0.460467	-0.5372
YBR298C	MAL31	-0.609	2.07	5.7	6.4	2.67722	0.697401	1.97982
YBR302C	COS2	9.481	9.98	9.1	8.4	0.497767	-0.685913	1.18368
YCL001W	RER1	7.84	8.3	7.9	7.3	0.463862	-0.662058	1.12592
YCL002C		4.916	5.37	6.7	6.9	0.457958	0.142847	0.31511
YCL004W	PGS1	5.013	5.87	6.3	6	0.861218	-0.33254	1.19376
YCL005W	LDB16	5.258	3.95	6.3	6.7	-1.3129	0.412849	-1.72575
YCL005W-A	VMA9	8.567	9.63	7.9	7.9	1.06368	0.051077	1.01261
YCL008C	STP22	6.804	6.13	6.9	6.8	-0.677903	-0.127154	-0.55075
YCL009C	ILV6	10.213	10.93	9.2	9.6	0.71759	0.353526	0.36406
YCL010C	SGF29	6.071	6.02	7.2	7.7	-0.049515	0.468852	-0.51837
YCL011C	GBP2	8.481	9.07	9.7	9.7	0.58589	0.05502	0.53087
YCL012C		5.944	7	5.3	5.2	1.05498	-0.113162	1.16814
YCL014W	BUD3	7.717	6.73	6.6	7.2	-0.990202	0.551528	-1.54173
YCL016C	DCC1	6.019	5.56	6.3	6.6	-0.457343	0.391454	-0.8488
YCL017C	NFS1	9.076	8.72	8	8.3	-0.361043	0.306375	-0.66742
YCL018W	LEU2	13.907	13.65	12.8	11.4	-0.260572	-1.31049	1.04992
YCL024W	KCC4	5.294	4.09	5.8	6.6	-1.20844	0.816401	-2.02484
YCL025C	AGP1	9.816	9.29	9.1	8.3	-0.524769	-0.721568	0.1968
YCL026C-B	HBN1	5.711	6.94	5.1	4.9	1.22821	-0.194582	1.42279
YCL027W	FUS1	6.768	6.33	6.4	5.5	-0.435184	-0.889667	0.45448
YCL028W	RNQ1	9.483	9.79	7.7	7.5	0.309039	-0.252729	0.56177
YCL029C	BIK1	6.263	4.62	6.9	6.8	-1.64663	-0.045599	-1.60103
YCL030C	HIS4	10.653	10.3	10.1	8.9	-0.351057	-1.15616	0.8051
YCL031C	RRP7	8.277	7.63	8.6	8.7	-0.647414	0.143478	-0.79089
YCL032W	STE50	5.802	6.48	6.8	6.8	0.673587	0.021938	0.65165
YCL033C	MXR2	6.879	7.72	6.6	6.6	0.842503	-0.025471	0.86797
YCL034W	LSB5	7.964	8.11	8.2	8.1	0.148957	-0.08195	0.23091
YCL035C	GRX1	8.236	9.19	7.3	6.9	0.957209	-0.391686	1.3489
YCL036W	GFD2	6.982	7.52	8.9	8.9	0.536181	0.0026	0.53358
YCL037C	SRO9	10.192	9.82	7.2	8.2	-0.372677	0.927781	-1.30046
YCL038C	ATG22	6.914	6.44	7	6.9	-0.478801	-0.108075	-0.37073
YCL039W	GID7	7.162	7.22	6.8	6.6	0.052785	-0.120224	0.17301
YCL043C	PDI1	12.489	12.81	10.9	10.7	0.322971	-0.274467	0.59744
YCL044C	MGR1	7.311	7.7	6.4	6.3	0.387398	-0.07547	0.46287
YCL045C	EMC1	9.858	8.65	8.8	8.7	-1.20387	-0.040691	-1.16318
YCL049C		6.937	7.49	6.8	6.9	0.556875	0.124315	0.43256
YCL050C	APA1	9.713	10.15	8.5	8	0.438517	-0.544419	0.98294
YCL051W	LRE1	6.018	3.99	6.7	6.7	-2.02509	-0.033939	-1.99115
YCL052C	PBN1	7.147	5.38	7	7.1	-1.77051	0.117534	-1.88805
YCL054W	SPB1	9.417	10.07	9.1	9.5	0.653176	0.349793	0.30338
YCL055W	KAR4	7.516	7.65	7	6.6	0.129977	-0.336385	0.46636
YCL056C		4.273	4.72	5.8	6.1	0.449536	0.306622	0.14291
YCL057W	PRD1	9.278	8.62	8.7	8.2	-0.661335	-0.57535	-0.08598
YCL058W-A	ADF1	6.617	7.62	7.5	6.9	0.998333	-0.636247	1.63458
YCL059C	KRR1	8.727	9.46	9.3	9	0.73573	-0.278339	1.01407
YCL061C	MRC1	6.273	6.09	6.2	6.5	-0.180839	0.269965	-0.4508
YCL063W	VAC17	6.792	6.69	6.7	6.7	-0.097949	-0.009659	-0.08829
YCL064C	CHA1	9.132	9	8.9	8.1	-0.133201	-0.841014	0.70781
YCL067C	HMLALPHA2	5.997	5.89	7	7.7	-0.104133	0.697267	-0.8014
YCR002C	CDC10	8.725	8.54	7.9	8	-0.184769	0.088603	-0.27337
YCR003W	MRPL32	6.796	7.76	6.4	6.1	0.966748	-0.29926	1.26601
YCR004C	YCP4	9.729	9.26	9.4	8.6	-0.465284	-0.783023	0.31774
YCR005C	CIT2	8.732	10.4	9.3	10.7	1.67178	1.32981	0.34197
YCR007C		3.558	5.11	4.5	4.9	1.55232	0.39634	1.15598
YCR008W	SAT4	7.264	4.85	8.1	8	-2.41599	-0.098723	-2.31727
YCR009C	RVS161	9.161	9.48	8.4	8.2	0.314577	-0.273663	0.58824
YCR011C	ADP1	8.636	8.31	8.3	8.3	-0.324323	-0.019839	-0.30448
YCR012W	PGK1	15.255	16.26	13.1	13.2	1.00336	0.137439	0.86592
YCR014C	POL4	-1.613	2.88	5.9	6.2	4.48851	0.346311	4.1422
YCR015C		5.211	6.38	5.9	6.2	1.16951	0.298078	0.87143
YCR016W		7.8	8.73	7.5	7.6	0.935483	0.128409	0.80707
YCR017C	CWH43	9.3	8.21	8.4	8.6	-1.08892	0.206883	-1.2958
YCR018C	SRD1	6.365	6.1	7	6.7	-0.266689	-0.275989	0.0093
YCR019W	MAK32	5.67	6.27	6.4	6.4	0.601029	0.086474	0.51455
YCR020C	PET18	3.457	1.37	5.3	4.9	-2.08259	-0.365597	-1.71699
YCR020C-A	MAK31	5.716	6.95	6.9	6.7	1.23076	-0.24841	1.47917
YCR020W-B	HTL1	5.735	6.77	5.1	5.4	1.03628	0.348209	0.68807
YCR023C		5.136	5.32	7.2	7	0.182388	-0.221295	0.40368
YCR024C	SLM5	5.172	6.1	5	4.9	0.926801	-0.069052	0.99585
YCR026C	NPP1	7.558	7.31	7.5	7.4	-0.252778	-0.049382	-0.2034
YCR027C	RHB1	5.865	4.43	6.7	7	-1.43054	0.24241	-1.67295
YCR028C	FEN2	7.476	5.17	7.8	7.9	-2.31002	0.0478	-2.35783
YCR028C-A	RIM1	9.244	9.93	8.1	8	0.685266	-0.181769	0.86703
YCR030C	SYP1	8.87	9.01	7.5	7.2	0.139864	-0.336758	0.47662
YCR031C	RPS14A	12.798	13.83	11.3	11.8	1.03056	0.51169	0.51888
YCR032W	BPH1	6.81	5.81	7.1	7.3	-0.99625	0.151018	-1.14727
YCR033W	SNT1	7.071	6.6	7.7	8.3	-0.473395	0.559532	-1.03293
YCR034W	FEN1	9.695	10.29	8.9	8.8	0.595431	-0.144251	0.73968
YCR035C	RRP43	8.329	8.87	8.6	8.6	0.539726	-0.034973	0.5747
YCR036W	RBK1	7.539	6.91	8	7.6	-0.62565	-0.404667	-0.22098
YCR037C	PHO87	8.256	7.93	8.4	8.7	-0.33046	0.292833	-0.62329
YCR042C	TAF2	8.243	8.08	8.2	8.2	-0.163286	-0.081724	-0.08156
YCR044C	PER1	7.584	7.62	7.2	7.2	0.040736	-0.004487	0.04522
YCR046C	IMG1	7.071	7.65	7.2	6.7	0.580213	-0.460387	1.0406
YCR047C	BUD23	8.044	8.22	8.7	8.7	0.175258	0.03132	0.14394
YCR048W	ARE1	7.155	6.63	7.8	8.1	-0.52759	0.263247	-0.79084
YCR051W		7.914	8.16	7.9	8.1	0.246724	0.258098	-0.01137
YCR052W	RSC6	7.826	8.4	8.2	8.3	0.574332	0.107456	0.46688
YCR053W	THR4	11.091	11.1	10	9.9	0.010751	-0.163196	0.17395
YCR054C	CTR86	7.116	7.25	6.9	6.7	0.138603	-0.183549	0.32215
YCR057C	PWP2	9.448	8.78	9.5	9.9	-0.66804	0.455493	-1.12353
YCR059C	YIH1	6.877	7.35	8.3	7.8	0.469739	-0.571158	1.0409
YCR060W	TAH1	6.302	7.15	7	6.6	0.848253	-0.363261	1.21151
YCR061W		8.303	8.27	6.6	6.3	-0.035469	-0.258678	0.22321
YCR063W	BUD31	5.337	5.61	4.5	5	0.274755	0.554442	-0.27969
YCR065W	HCM1	7.241	7.45	7.3	7.6	0.206834	0.335384	-0.12855
YCR066W	RAD18	5.192	6.18	5.5	5.8	0.991883	0.284802	0.70708
YCR067C	SED4	7.835	7.36	8.1	8.1	-0.470937	0.001467	-0.4724
YCR068W	ATG15	6.7	5.79	5.8	6.1	-0.90794	0.254221	-1.16216
YCR069W	CPR4	7.55	7.11	7.5	7.5	-0.43806	0.008657	-0.44672
YCR071C	IMG2	5.979	6.15	5.9	5.8	0.169341	-0.03836	0.2077
YCR072C	RSA4	9.078	9.71	9.1	8.9	0.630546	-0.179597	0.81014
YCR073C	SSK22	4.48	5.73	6.5	6.5	1.25345	0.030077	1.22337
YCR073W-A	SOL2	8.118	8.52	7.3	7.3	0.405727	-0.007481	0.41321
YCR075C	ERS1	5.898	4.54	6.1	5.6	-1.35339	-0.523872	-0.82952
YCR075W-A		6.193	6.48	5.3	5.2	0.287469	-0.117777	0.40525
YCR076C		6.33	6.96	6.5	6.3	0.630438	-0.244186	0.87462
YCR077C	PAT1	9.568	9.6	9.1	9.2	0.034175	0.14886	-0.11469
YCR079W	PTC6	5.572	5.18	6	6	-0.39023	-0.066808	-0.32342
YCR081W	SRB8	6.801	7.29	6.3	6.5	0.488579	0.22628	0.2623
YCR082W	AHC2	7.27	7.56	7.9	7.5	0.294085	-0.356997	0.65108
YCR083W	TRX3	6.924	5.7	6.8	6.3	-1.2257	-0.564863	-0.66083
YCR084C	TUP1	9.571	8.07	8.5	8.9	-1.50055	0.363657	-1.86421
YCR086W	CSM1	5.531	5.93	4.7	5.3	0.399128	0.598561	-0.19943
YCR087C-A		7.773	8.35	7.6	7.5	0.57931	-0.089671	0.66898
YCR088W	ABP1	10.742	10.8	8.3	8.2	0.055597	-0.139911	0.19551
YCR089W	FIG2	4.684	5.83	6.7	6.5	1.14591	-0.280003	1.42591
YCR090C		7.347	7.04	7.7	7.3	-0.309205	-0.35551	0.0463
YCR091W	KIN82	5.275	4.99	4.8	5.7	-0.287848	0.823547	-1.1114
YCR092C	MSH3	6.561	6.97	6.9	7.1	0.407684	0.13612	0.27156
YCR093W	CDC39	9.968	9.35	8.3	8.5	-0.620423	0.250221	-0.87064
YCR094W	CDC50	7.384	7.45	6.5	6.8	0.064178	0.225863	-0.16168
YCR095C	OCA4	6.059	6.25	6.4	7.1	0.194177	0.66272	-0.46854
YCR096C	HMRA2	3.395	0.77	6.5	7.1	-2.62032	0.621751	-3.24207
YCR097W	HMRA1	6.722	7.19	7	6.7	0.46768	-0.338102	0.80578
YCR102C		2.999	4.43	4.5	5.3	1.43266	0.844894	0.58776
YCR107W	AAD3	-0.037	2.7	5.8	5.8	2.73955	-0.005613	2.74516
YDL001W	RMD1	6.308	6.95	6.3	6.6	0.646421	0.308874	0.33755
YDL002C	NHP10	6.807	7.27	6.6	6.9	0.464588	0.290886	0.1737
YDL003W	MCD1	7.14	7.02	7.2	7.1	-0.118473	-0.090255	-0.02822
YDL004W	ATP16	9.062	9.53	8	7.8	0.463818	-0.236367	0.70018
YDL005C	MED2	7.137	7.17	7.4	7.2	0.036654	-0.240006	0.27666
YDL006W	PTC1	6.007	3.36	6.4	6.7	-2.64846	0.331368	-2.97982
YDL007W	RPT2	9.393	9.73	9.5	8.7	0.332943	-0.757378	1.09032
YDL008W	APC11	5.826	6.76	6.4	6.3	0.937298	-0.103072	1.04037
YDL010W	GRX6	6.826	7.47	6.6	6.2	0.646644	-0.402575	1.04922
YDL012C		7.163	7.52	5.6	5.5	0.359337	-0.10228	0.46162
YDL013W	SLX5	6.359	5.33	7.4	8	-1.0274	0.619034	-1.64643
YDL014W	NOP1	11.15	11.47	10.8	10.9	0.323787	0.108173	0.21561
YDL015C	TSC13	9.564	10.2	9.4	9.3	0.632615	-0.121788	0.7544
YDL017W	CDC7	6.152	6.61	6.4	6.4	0.460041	-0.054763	0.5148
YDL018C	ERP3	6.547	6.39	6.1	5.9	-0.154637	-0.201503	0.04687
YDL019C	OSH2	8.532	5.67	7.6	8.1	-2.85973	0.485636	-3.34536
YDL020C	RPN4	8.178	6.47	8.9	8.5	-1.70846	-0.385144	-1.32332
YDL021W	GPM2	6.147	5.52	5.8	4.3	-0.62967	-1.50153	0.87186
YDL022W	GPD1	12.582	11.12	10.6	8.2	-1.46083	-2.37833	0.9175
YDL025C	RTK1	7.879	5.53	7.7	7.3	-2.35076	-0.420221	-1.93054
YDL027C		5.743	5.45	6.7	6.5	-0.288105	-0.216601	-0.0715
YDL028C	MPS1	6.005	5.65	6.5	6.8	-0.357772	0.257576	-0.61535
YDL029W	ARP2	9.401	9.8	9.2	8.8	0.394287	-0.400124	0.79441
YDL030W	PRP9	6.12	6.55	6.9	7.1	0.425804	0.198962	0.22684
YDL031W	DBP10	9.424	10.05	9.1	9.5	0.622672	0.383142	0.23953
YDL033C	SLM3	4.328	5.6	5.6	5.7	1.27221	0.018545	1.25367
YDL035C	GPR1	6.3	5.16	6.9	7.3	-1.14428	0.396289	-1.54057
YDL036C	PUS9	6.576	6.58	6.2	6.5	0.007541	0.31316	-0.30562
YDL037C	BSC1	2.083	5.14	7	8	3.05777	0.931253	2.12652
YDL039C	PRM7	3.955	6.58	8.7	9.5	2.63039	0.826016	1.80438
YDL040C	NAT1	9.939	9.85	9.3	9.1	-0.090452	-0.259707	0.16925
YDL042C	SIR2	6.739	7.4	6.9	7.3	0.659631	0.361375	0.29826
YDL043C	PRP11	5.952	7.03	6.4	6.3	1.08298	-0.069175	1.15215
YDL044C	MTF2	6.236	7.39	5.9	5.9	1.15519	-0.017854	1.17305
YDL045C	FAD1	6.665	6.29	6.7	7.2	-0.374256	0.48074	-0.855
YDL045W-A	MRP10	6.763	7.18	6.3	5.7	0.415446	-0.593612	1.00906
YDL046W	NPC2	9.119	8.43	8.2	7.9	-0.688475	-0.324594	-0.36388
YDL047W	SIT4	7.997	7.43	7.6	8	-0.571609	0.421818	-0.99343
YDL048C	STP4	7.192	7.63	6.3	6	0.433501	-0.284356	0.71786
YDL049C	KNH1	5.453	5.83	6.1	5.6	0.376022	-0.465196	0.84122
YDL051W	LHP1	9.322	10.01	9.7	9.7	0.685684	0.005791	0.67989
YDL052C	SLC1	7.983	7.59	7.3	7.2	-0.393087	-0.197779	-0.19531
YDL054C	MCH1	7.408	7.53	7.5	6.8	0.122555	-0.729762	0.85232
YDL055C	PSA1	12.236	11.66	11.7	11.1	-0.58077	-0.615619	0.03485
YDL056W	MBP1	6.513	6.29	6.9	7.2	-0.225536	0.253016	-0.47855
YDL057W		5.248	6.37	5.2	5.1	1.12338	-0.049757	1.17314
YDL058W	USO1	8.394	6.94	6.7	7.4	-1.45272	0.697847	-2.15056
YDL059C	RAD59	3.865	3.21	5.3	5.7	-0.656689	0.375086	-1.03178
YDL060W	TSR1	8.854	8.37	9.2	9.4	-0.479406	0.195632	-0.67504
YDL061C	RPS29B	10.755	11.69	9.6	9.7	0.932882	0.177823	0.75506
YDL063C		8.587	8.45	8.5	8.7	-0.136579	0.195077	-0.33166
YDL064W	UBC9	7.28	7.23	6.6	6.8	-0.047906	0.20177	-0.24968
YDL065C	PEX19	6.327	6.35	6.4	6	0.025393	-0.440486	0.46588
YDL066W	IDP1	10.869	10.04	9.6	9.2	-0.831363	-0.335767	-0.4956
YDL067C	COX9	7.537	9.12	6.7	7.2	1.58601	0.487407	1.09861
YDL069C	CBS1	4.193	2.52	4.9	5	-1.67258	0.041396	-1.71397
YDL070W	BDF2	8.264	8.17	9.1	8.7	-0.090745	-0.409319	0.31857
YDL072C	YET3	9.187	9.37	8.7	8.6	0.187456	-0.099003	0.28646
YDL073W		6.803	5.28	7.9	8.2	-1.52778	0.287063	-1.81484
YDL074C	BRE1	7.24	7.35	8.6	9.1	0.11397	0.440563	-0.32659
YDL075W	RPL31A	11.794	12.57	10.9	11.5	0.778655	0.65499	0.12366
YDL076C	RXT3	5.988	5.89	6.6	6.9	-0.100748	0.28663	-0.38738
YDL077C	VAM6	6.668	6.65	6.6	7.3	-0.015361	0.656151	-0.67151
YDL078C	MDH3	9.111	9.29	9	8.5	0.174653	-0.524566	0.69922
YDL080C	THI3	5.891	5.07	7.2	7.5	-0.823178	0.289517	-1.11269
YDL081C	RPP1A	11.646	12.94	11.2	11.6	1.29404	0.491203	0.80284
YDL082W	RPL13A	12.264	13.08	11.1	11.4	0.815869	0.279287	0.53658
YDL083C	RPS16B	11.902	12.12	10.6	10.9	0.218161	0.31729	-0.09913
YDL084W	SUB2	11.246	9.83	11.1	10.5	-1.42134	-0.54716	-0.87418
YDL085C-A		4.564	5.62	5.3	5.6	1.05671	0.268827	0.78788
YDL086W		8.804	9.16	8	7.9	0.359917	-0.044815	0.40473
YDL087C	LUC7	5.066	6.04	5.8	6.2	0.974329	0.379598	0.59473
YDL088C	ASM4	7.375	7.66	7.5	7.5	0.287816	0.06999	0.21783
YDL089W	NUR1	6.304	3.88	6	5.6	-2.42887	-0.418763	-2.01011
YDL090C	RAM1	6.223	5.54	6.5	6.7	-0.680594	0.178477	-0.85907
YDL092W	SRP14	7.29	8.03	6.9	7.2	0.73831	0.298574	0.43974
YDL095W	PMT1	10.638	10.28	9.5	9.4	-0.361429	-0.037536	-0.32389
YDL097C	RPN6	9.494	9.51	9.2	9.2	0.011833	-0.081437	0.09327
YDL098C	SNU23	5.186	5.56	5.3	5.7	0.376506	0.318174	0.05833
YDL099W	BUG1	6.966	7.09	7	6.6	0.127534	-0.407565	0.5351
YDL100C	GET3	10.034	10.55	9.4	9.1	0.520832	-0.304191	0.82502
YDL101C	DUN1	6.251	6.82	6.6	6.5	0.571527	-0.107875	0.6794
YDL102W	POL3	8.178	7.97	7.1	7.4	-0.205792	0.323358	-0.52915
YDL103C	QRI1	8.608	8.71	8	7.3	0.103304	-0.734497	0.8378
YDL104C	QRI7	4.694	5.9	5.5	5.3	1.20151	-0.166842	1.36836
YDL105W	NSE4	5.322	5.23	5.1	5.1	-0.091398	0.016299	-0.1077
YDL106C	PHO2	6.31	6.65	5.9	6	0.343381	0.111734	0.23165
YDL107W	MSS2	5.346	5.26	5.8	5.2	-0.084884	-0.594117	0.50923
YDL108W	KIN28	6.33	7.09	6.9	6.9	0.754839	-0.040052	0.79489
YDL109C		1.534	2.99	5.2	5.7	1.45748	0.489407	0.96808
YDL110C	TMA17	8.161	7.67	6.7	5.7	-0.495678	-1.03779	0.54211
YDL111C	RRP42	8.103	7.72	8.7	8.8	-0.386055	0.176904	-0.56296
YDL112W	TRM3	9.018	8.24	8.8	8.8	-0.774389	0.040897	-0.81529
YDL113C	ATG20	6.662	6.29	7	7.5	-0.373299	0.472389	-0.84569
YDL115C	IWR1	5.328	6.12	6.9	6.9	0.79203	-0.016752	0.80878
YDL116W	NUP84	8.416	8.23	8.2	8.5	-0.185197	0.290632	-0.47583
YDL117W	CYK3	6.972	6.39	7.7	8	-0.584533	0.325809	-0.91034
YDL119C		6.089	5.41	6.7	6.4	-0.678009	-0.2788	-0.39921
YDL120W	YFH1	7.191	6.42	7.1	7	-0.76635	-0.1411	-0.62525
YDL121C		7.606	8.72	7.6	7.6	1.11625	0.067858	1.04839
YDL122W	UBP1	8.922	6.85	8.5	9	-2.07005	0.46796	-2.53801
YDL123W	SNA4	6.586	4.56	5.8	6.2	-2.02813	0.318723	-2.34685
YDL124W		10.768	10.43	9.7	8.6	-0.337882	-1.07979	0.7419
YDL125C	HNT1	8.889	9.83	8.9	8.8	0.94471	-0.113558	1.05827
YDL126C	CDC48	12.294	12.63	11.1	10.8	0.33885	-0.315488	0.65434
YDL127W	PCL2	6.032	5.85	5.7	5.5	-0.184034	-0.29002	0.10599
YDL128W	VCX1	9.496	9.43	9.1	8.7	-0.066917	-0.342557	0.27564
YDL129W		3.993	4.02	5.7	6.7	0.023116	1.01495	-0.99184
YDL130W	RPP1B	12.215	14.17	10.9	11.5	1.95551	0.568882	1.38663
YDL131W	LYS21	10.236	10.6	9.1	8.9	0.36637	-0.222055	0.58842
YDL132W	CDC53	8.508	7.54	8.4	8.5	-0.971088	0.162218	-1.13331
YDL133C-A	RPL41B	10.357	12.53	9.6	10.6	2.16999	1.03218	1.13781
YDL133W		6.618	5.35	7.6	7.4	-1.26301	-0.275933	-0.98708
YDL134C	PPH21	8.708	7.27	9.3	9.3	-1.43968	-0.003635	-1.43604
YDL135C	RDI1	7.84	8.35	7.1	7.4	0.512182	0.256655	0.25553
YDL136W	RPL35B	12.262	13.03	11.5	11.9	0.763919	0.382521	0.3814
YDL137W	ARF2	10.144	10.39	9.2	9.2	0.250628	-0.030064	0.28069
YDL138W	RGT2	5.802	5.3	6.6	7.3	-0.506821	0.690792	-1.19761
YDL139C	SCM3	3.849	5.57	5.2	4.8	1.72494	-0.450213	2.17515
YDL140C	RPO21	10.676	8.47	9.1	9.5	-2.20621	0.374528	-2.58074
YDL141W	BPL1	7.8	6.16	6.9	6.9	-1.64149	-0.030019	-1.61147
YDL142C	CRD1	6.082	3.75	6.4	6.5	-2.33232	0.070814	-2.40314
YDL143W	CCT4	10.144	10.37	9.6	9.8	0.229461	0.173851	0.05561
YDL144C		7.15	7.77	7	7.1	0.623608	0.121778	0.50183
YDL145C	COP1	10.598	8.55	9.9	9.9	-2.04907	0.071794	-2.12086
YDL146W	LDB17	4.996	3.53	6.3	6	-1.47061	-0.373996	-1.09662
YDL147W	RPN5	9.541	9.84	9.4	9.3	0.295325	-0.098437	0.39376
YDL148C	NOP14	8.846	9.17	8.7	9.2	0.320439	0.471141	-0.1507
YDL149W	ATG9	5.726	5.88	5.3	4.7	0.148866	-0.601125	0.74999
YDL150W	RPC53	7.679	7.99	8.7	9	0.308063	0.317847	-0.00978
YDL153C	SAS10	8.942	9.58	9	9.1	0.636706	0.155974	0.48073
YDL154W	MSH5	1.162	-26.96	5.2	4.3	-28.121	-0.899456	-27.2215
YDL155W	CLB3	7.167	6.7	7.9	8	-0.468792	0.176005	-0.6448
YDL156W		5.739	5.73	5.2	5.6	-0.00979	0.388131	-0.39792
YDL157C		7.284	8.06	7.3	7.1	0.777679	-0.14436	0.92204
YDL159W	STE7	6.687	6.24	6.5	6.6	-0.448426	0.072362	-0.52079
YDL160C	DHH1	10.29	9.73	8.3	8.6	-0.564748	0.329306	-0.89405
YDL160C-A		4.908	6.18	4.9	5	1.27271	0.084398	1.18831
YDL161W	ENT1	8.101	8.81	7.5	7.6	0.70487	0.045411	0.65946
YDL164C	CDC9	7.557	6.59	7.2	7.6	-0.96858	0.342813	-1.31139
YDL165W	CDC36	6.94	7.72	6.8	7	0.782361	0.215112	0.56725
YDL166C	FAP7	7.471	8.25	7.4	7.4	0.777645	-0.035065	0.81271
YDL167C	NRP1	8.258	8.49	8.8	8.9	0.235343	0.116221	0.11912
YDL168W	SFA1	8.876	9.21	8.5	8	0.334289	-0.470777	0.80507
YDL170W	UGA3	6.296	6.71	7.3	7.4	0.411554	0.103982	0.30757
YDL171C	GLT1	10.783	8.87	9.3	9.2	-1.91021	-0.187048	-1.72317
YDL173W	PAR32	7.695	7.77	7.1	7.4	0.073732	0.306281	-0.23255
YDL174C	DLD1	8.772	7.82	8.2	8.1	-0.948848	-0.165219	-0.78363
YDL175C	AIR2	6.141	6.68	5.7	6	0.540676	0.348712	0.19196
YDL176W		5.379	4.73	6.5	6.6	-0.649053	0.097947	-0.747
YDL177C		3.866	4.21	6.2	5.8	0.345369	-0.405611	0.75098
YDL178W	DLD2	8.616	9.32	8.7	8.2	0.702546	-0.469442	1.17199
YDL179W	PCL9	6.036	6.49	5	6.1	0.451063	1.08451	-0.63344
YDL180W		6.566	4.31	7.2	7.3	-2.25937	0.077484	-2.33686
YDL181W	INH1	7.607	7.39	7.2	5.8	-0.217158	-1.38334	1.16618
YDL182W	LYS20	9.89	10.26	8.8	8.5	0.368381	-0.264281	0.63266
YDL183C		5.063	5.3	5.2	4.7	0.237859	-0.471118	0.70898
YDL184C	RPL41A	10.357	12.53	9.6	10.6	2.16999	1.0299	1.14009
YDL185W	VMA1	13.044	12.18	11.3	11.6	-0.864768	0.301301	-1.16607
YDL188C	PPH22	8.083	6.06	8.3	8	-2.02139	-0.334028	-1.68736
YDL189W	RBS1	6.988	5.11	7.5	7.5	-1.88222	-0.036595	-1.84563
YDL190C	UFD2	8.578	6.75	8.2	8.3	-1.82677	0.127694	-1.95446
YDL191W	RPL35A	12.308	13.09	11.6	12	0.781197	0.416437	0.36476
YDL192W	ARF1	11.49	12.43	10.8	10.8	0.93622	-0.010165	0.94639
YDL193W	NUS1	7.938	7	7.6	7.5	-0.934491	-0.088115	-0.84638
YDL194W	SNF3	4.536	3.68	5.2	5.6	-0.859648	0.423622	-1.28327
YDL195W	SEC31	10.806	9.69	8.6	8.8	-1.11594	0.24784	-1.36378
YDL197C	ASF2	4.118	4.31	5.9	6.3	0.191864	0.424741	-0.23288
YDL198C	GGC1	8.423	7.58	8	7.2	-0.84436	-0.869294	0.02493
YDL200C	MGT1	5.123	5.82	5.1	5.7	0.692196	0.51078	0.18142
YDL201W	TRM8	7.875	7.93	7.5	7.6	0.054242	0.11	-0.05576
YDL202W	MRPL11	6.94	7.03	6.7	6.9	0.087382	0.186805	-0.09942
YDL203C	ACK1	6.262	4.41	7.4	7.5	-1.85101	0.143199	-1.99421
YDL204W	RTN2	8.231	6.33	6.4	4.9	-1.90548	-1.49458	-0.4109
YDL205C	HEM3	7.54	5.82	8.1	8.5	-1.71517	0.366894	-2.08207
YDL206W		4.55	4.33	6.1	6	-0.222824	-0.036441	-0.18638
YDL207W	GLE1	6.849	5.85	7.6	7.7	-1.00258	0.117657	-1.12024
YDL208W	NHP2	9.516	9.86	9.5	9.5	0.343771	0.009321	0.33445
YDL209C	CWC2	6.51	6.44	7	7	-0.075071	0.015906	-0.09098
YDL211C		5.164	4.56	5.1	5	-0.604917	-0.075369	-0.52955
YDL212W	SHR3	9.109	9.42	8.9	8.7	0.310485	-0.152598	0.46308
YDL213C	NOP6	8.001	8.95	8.9	8.6	0.948189	-0.340382	1.28857
YDL215C	GDH2	8.185	8.29	8.7	9.1	0.103294	0.39822	-0.29493
YDL216C	RRI1	4.781	5.11	5.4	5.3	0.328341	-0.106837	0.43518
YDL217C	TIM22	6.931	6.23	7.1	7.1	-0.695721	-0.050368	-0.64535
YDL219W	DTD1	6.606	7.41	5.9	6.7	0.806667	0.831911	-0.02524
YDL220C	CDC13	5.99	5.33	5.7	5.8	-0.659436	0.062991	-0.72243
YDL222C	FMP45	7.382	5.6	6.3	4.7	-1.77808	-1.59814	-0.17994
YDL223C	HBT1	8.288	6.69	6.9	5.9	-1.5994	-1.01353	-0.58587
YDL224C	WHI4	7.805	6.12	7.3	7.9	-1.68777	0.641042	-2.32881
YDL225W	SHS1	8.448	8.75	7.8	7.7	0.300954	-0.09515	0.3961
YDL226C	GCS1	8.873	8.93	8.4	8.2	0.056235	-0.160231	0.21647
YDL227C	HO	7.56	7.99	7.4	6.9	0.431779	-0.522803	0.95458
YDL229W	SSB1	14.591	14.69	13.6	13.7	0.102734	0.121798	-0.01906
YDL230W	PTP1	6.2	5.75	6.7	6.3	-0.447223	-0.350793	-0.09643
YDL231C	BRE4	3.926	4.75	8.2	8.6	0.827681	0.350625	0.47706
YDL233W		6.742	7.36	5.9	6.5	0.613512	0.520048	0.09346
YDL234C	GYP7	8.397	8.24	7.5	7.9	-0.155609	0.371676	-0.52728
YDL235C	YPD1	7.716	6.02	7.1	7.3	-1.70044	0.158132	-1.85857
YDL236W	PHO13	9.114	8.91	8.6	8.2	-0.203152	-0.450962	0.24781
YDL237W	AIM6	8.359	8.4	7.7	7.6	0.036552	-0.04246	0.07901
YDL238C	GUD1	5.189	5.59	5.1	5.4	0.39716	0.349125	0.04804
YDL239C	ADY3	-29.9	2.59	5.4	5.1	32.4871	-0.240703	32.7278
YDL240W	LRG1	6.492	5.03	7.4	7.5	-1.46194	0.15326	-1.6152
YDL243C	AAD4	0.364	3.21	5.3	5.7	2.84218	0.423947	2.41824
YDL248W	COS7	8.939	9.42	8.4	7.7	0.480926	-0.705096	1.18602
YDR001C	NTH1	9.535	9.11	8.9	9	-0.422498	0.129988	-0.55249
YDR002W	YRB1	10.364	11.8	10.3	10.5	1.43189	0.220107	1.21178
YDR004W	RAD57	5.589	5.85	7.3	7.2	0.260191	-0.051144	0.31133
YDR005C	MAF1	6.237	6.95	7	6.9	0.714629	-0.004271	0.7189
YDR006C	SOK1	8.676	8.12	8.8	9.1	-0.551543	0.237201	-0.78874
YDR007W	TRP1	7.022	7.11	8	8	0.088919	0.03647	0.05245
YDR011W	SNQ2	9.892	8.14	9.4	9.3	-1.75193	-0.156009	-1.59592
YDR012W	RPL4B	13.329	14.28	12.5	13.2	0.949165	0.676809	0.27236
YDR013W	PSF1	5.307	5.81	6.1	6.3	0.503085	0.195313	0.30777
YDR014W	RAD61	4.327	4.4	5.6	5.9	0.069859	0.372468	-0.30261
YDR016C	DAD1	4.825	4.91	5.8	6.4	0.085687	0.664672	-0.57899
YDR017C	KCS1	7.625	7.93	8.6	8.4	0.309587	-0.235989	0.54558
YDR019C	GCV1	9.764	9.61	9.7	8.6	-0.15202	-1.09234	0.94032
YDR020C	DAS2	6.05	6.59	6.4	6.5	0.537818	0.167868	0.36995
YDR021W	FAL1	6.811	7.28	7.8	7.6	0.466628	-0.19197	0.6586
YDR023W	SES1	11.407	12.01	10.4	10.6	0.60765	0.166989	0.44066
YDR025W	RPS11A	12.273	13.16	11.5	11.7	0.888507	0.24147	0.64704
YDR026C		5.905	5.54	7.3	7.6	-0.369166	0.375465	-0.74463
YDR027C	VPS54	6.58	5.37	7.3	7.5	-1.21275	0.201167	-1.41392
YDR028C	REG1	8.016	6.47	8.5	8.9	-1.54607	0.495632	-2.0417
YDR030C	RAD28	4.244	5.43	5.7	6	1.18837	0.261086	0.92729
YDR031W	MIC14	5.845	6.04	5.6	5.1	0.191145	-0.493957	0.6851
YDR032C	PST2	10.33	11	9.7	9.1	0.674021	-0.528629	1.20265
YDR033W	MRH1	12.367	10.47	11.5	11	-1.89343	-0.456206	-1.43722
YDR034C	LYS14	6.057	5.53	7.2	7.7	-0.525645	0.496153	-1.0218
YDR034C-A		6.186	6.6	4.9	5.1	0.410776	0.215994	0.19478
YDR035W	ARO3	9.925	10.12	9.8	9.2	0.190155	-0.624016	0.81417
YDR036C	EHD3	7.656	7.43	7.4	7	-0.23103	-0.398956	0.16793
YDR037W	KRS1	12.137	12.69	11.1	11.1	0.550303	0.012018	0.53829
YDR038C	ENA5	9.608	9.63	9.5	9.7	0.018186	0.211715	-0.19353
YDR039C	ENA2	9.698	9.72	9.6	9.8	0.018443	0.174228	-0.15578
YDR040C	ENA1	9.583	9.56	9.5	9.7	-0.021461	0.169938	-0.1914
YDR041W	RSM10	7.149	7.63	7.4	6.7	0.482832	-0.748127	1.23096
YDR043C	NRG1	5.45	5.49	5.2	6	0.042583	0.812994	-0.77041
YDR044W	HEM13	8.227	8.06	7.5	7.1	-0.16978	-0.414503	0.24472
YDR045C	RPC11	5.991	6.95	6.7	7	0.961903	0.246375	0.71553
YDR046C	BAP3	9.459	8.49	9.1	9	-0.971147	-0.146031	-0.82512
YDR047W	HEM12	8.062	7	8.4	8.8	-1.05803	0.308744	-1.36678
YDR049W	VMS1	7.229	7.48	6.9	7.3	0.246076	0.428005	-0.18193
YDR050C	TPI1	14.124	14.69	13.8	13.2	0.562344	-0.584573	1.14692
YDR051C	DET1	7.03	6.93	7.2	7.5	-0.097821	0.309603	-0.40742
YDR052C	DBF4	6.879	5.51	7.7	8	-1.37147	0.340824	-1.7123
YDR054C	CDC34	8.613	8.06	7.9	8.2	-0.556969	0.326415	-0.88338
YDR055W	PST1	9.132	10.21	7.9	8.4	1.07784	0.530242	0.5476
YDR056C		8.018	8	7.8	7.4	-0.017175	-0.367573	0.3504
YDR057W	YOS9	6.945	6.92	6.9	6.8	-0.026345	-0.014057	-0.01229
YDR058C	TGL2	5.085	5.13	5.5	5	0.047984	-0.539257	0.58724
YDR059C	UBC5	6.172	6.25	6.3	5.1	0.079911	-1.15633	1.23624
YDR060W	MAK21	9.904	8.5	9.7	9.9	-1.40209	0.19469	-1.59678
YDR061W		7.2	7.67	7.4	7	0.465837	-0.327665	0.7935
YDR062W	LCB2	9.325	7.04	8.9	8.9	-2.28391	-0.011035	-2.27288
YDR063W	AIM7	6.711	6.7	6	6.2	-0.015955	0.264577	-0.28053
YDR064W	RPS13	12.836	13.5	11	11.7	0.665146	0.71769	-0.05254
YDR065W	RRG1	4.331	5.06	5	5.6	0.730719	0.55756	0.17316
YDR067C	OCA6	5.839	6.93	6.7	6.7	1.0903	0.018113	1.07219
YDR068W	DOS2	6.353	6.35	6.1	6.6	-0.003514	0.441709	-0.44522
YDR069C	DOA4	5.806	5.47	5.7	6	-0.333933	0.2377	-0.57163
YDR071C	PAA1	9.269	9.48	8.8	8.3	0.209108	-0.449744	0.65885
YDR072C	IPT1	9.871	8.7	9.8	9.6	-1.17077	-0.171943	-0.99882
YDR073W	SNF11	6.154	5.22	6.2	6.5	-0.936449	0.301395	-1.23784
YDR074W	TPS2	12.012	10.8	10.2	8.9	-1.20775	-1.36886	0.16111
YDR075W	PPH3	6.679	5.73	7	7.3	-0.949818	0.31474	-1.26456
YDR076W	RAD55	4.244	4.32	5.1	5.2	0.073547	0.129707	-0.05616
YDR077W	SED1	14.041	14.17	12.2	11.6	0.128764	-0.662254	0.79102
YDR078C	SHU2	2.427	4.2	5	5.2	1.7736	0.187297	1.5863
YDR079W	PET100	6.606	6.51	5.2	4.9	-0.092856	-0.278111	0.18525
YDR080W	VPS41	6.383	7.5	6.6	6.9	1.12105	0.274313	0.84673
YDR081C	PDC2	7.353	7.23	7.8	8.1	-0.121065	0.303666	-0.42473
YDR082W	STN1	2.093	3.12	6.6	7.3	1.03085	0.718126	0.31272
YDR083W	RRP8	8.065	9.18	8.3	8.5	1.11737	0.218509	0.89887
YDR084C	TVP23	7.419	7.19	6.3	6.4	-0.232892	0.031246	-0.26414
YDR085C	AFR1	5.838	4.45	4.9	5.8	-1.38991	0.855147	-2.24506
YDR086C	SSS1	9.178	9.81	8.5	8.3	0.634579	-0.163607	0.79819
YDR087C	RRP1	8.158	8.42	8.8	8.6	0.26136	-0.158559	0.41992
YDR088C	SLU7	6.108	4.83	6.4	6.7	-1.28245	0.276275	-1.55872
YDR089W		7.568	6.73	6.9	7.1	-0.842426	0.266599	-1.10902
YDR090C		6.558	5.91	6.3	6.4	-0.645454	0.007458	-0.65291
YDR091C	RLI1	10.229	10.83	9.6	9.6	0.59966	0.028583	0.57108
YDR092W	UBC13	7.992	8.17	7.7	7.1	0.176165	-0.632035	0.8082
YDR093W	DNF2	8.44	6.23	7.9	8.2	-2.21103	0.358927	-2.56996
YDR096W	GIS1	7.63	6	6.8	6.7	-1.62789	-0.130871	-1.49701
YDR097C	MSH6	8.007	7.7	7.6	7.3	-0.310988	-0.263438	-0.04755
YDR098C	GRX3	9.171	9.62	8.4	8.2	0.448681	-0.275469	0.72415
YDR099W	BMH2	10.498	9.84	9	8.9	-0.653759	-0.091557	-0.5622
YDR100W	TVP15	7.363	8.19	7	6.9	0.83177	-0.132322	0.96409
YDR101C	ARX1	10.062	10.71	9.8	9.8	0.645882	0.027642	0.61824
YDR103W	STE5	7.451	7.97	7.1	7.4	0.518456	0.264212	0.25424
YDR105C	TMS1	7.469	6.42	7.2	7.4	-1.05398	0.201249	-1.25523
YDR107C	TMN2	7.17	6.74	6.7	6.7	-0.425797	-0.025201	-0.4006
YDR108W	GSG1	6.462	6.47	7.2	7.2	0.006165	0.010271	-0.00411
YDR109C		5.635	6.91	6.8	7.4	1.27519	0.549685	0.72551
YDR110W	FOB1	6.651	6.44	6.8	7.3	-0.212417	0.482587	-0.695
YDR111C	ALT2	7.319	5.11	7.9	7.5	-2.20959	-0.356331	-1.85326
YDR113C	PDS1	5.633	6.1	6	6.3	0.471995	0.268338	0.20366
YDR115W		6.417	6.01	5.5	6.1	-0.407555	0.585438	-0.99299
YDR116C	MRPL1	7.538	7.85	7.3	6.6	0.314156	-0.743073	1.05723
YDR117C	TMA64	7.691	7.44	7.5	7.2	-0.246721	-0.389933	0.14321
YDR118W	APC4	4.983	5.17	5.9	6	0.185326	0.047324	0.138
YDR119W	VBA4	8.623	7.81	8.4	8.5	-0.817059	0.166005	-0.98306
YDR120C	TRM1	9.056	9.87	8.9	9	0.809689	0.017708	0.79198
YDR121W	DPB4	6.515	7.02	7.1	7.5	0.501999	0.475542	0.02646
YDR122W	KIN1	8.089	6.05	7.5	7.8	-2.03709	0.271137	-2.30822
YDR123C	INO2	6.868	6.62	7.3	6.9	-0.24607	-0.396455	0.15038
YDR124W		3.392	3.33	4.8	4.6	-0.063012	-0.15813	0.09512
YDR125C	ECM18	4.737	5.32	4.9	5.1	0.578988	0.161379	0.41761
YDR127W	ARO1	10.819	10.19	9.7	9.7	-0.627538	0.046568	-0.67411
YDR128W	MTC5	7.019	6.69	7.8	7.7	-0.330165	-0.08819	-0.24197
YDR129C	SAC6	10.704	11.32	9.8	9.9	0.61884	0.161782	0.45706
YDR130C	FIN1	5.55	6.32	5.5	5.8	0.765159	0.294192	0.47097
YDR131C		5.026	5.5	5.6	5.8	0.479171	0.212886	0.26628
YDR132C		5.402	5.12	5.8	6.3	-0.283487	0.447169	-0.73066
YDR135C	YCF1	9.697	7.65	8.8	8.7	-2.04571	-0.113803	-1.93191
YDR137W	RGP1	6.689	6.31	7.2	7.6	-0.377114	0.430209	-0.80732
YDR138W	HPR1	7.644	8.28	7	7.2	0.635884	0.230489	0.40539
YDR139C	RUB1	6.587	7.43	6.1	6.3	0.845535	0.254777	0.59076
YDR140W	MTQ2	5.731	6.1	5.9	6.3	0.369516	0.443414	-0.0739
YDR141C	DOP1	8.159	8.03	7.5	7.7	-0.12493	0.236814	-0.36174
YDR142C	PEX7	5.869	4.48	6.4	6.2	-1.39163	-0.191556	-1.20008
YDR143C	SAN1	6.914	5.04	6.9	7.8	-1.87089	0.900169	-2.77106
YDR144C	MKC7	7.602	5.82	6.8	7.3	-1.77881	0.429407	-2.20822
YDR145W	TAF12	8.03	6.57	8.3	8.2	-1.45671	-0.076474	-1.38024
YDR146C	SWI5	7.47	6.22	7.2	7.6	-1.24473	0.47104	-1.71577
YDR147W	EKI1	6.48	7.04	7.2	7.2	0.559558	0.027577	0.53198
YDR148C	KGD2	9.413	8.88	8.5	7.5	-0.530165	-0.956293	0.42613
YDR150W	NUM1	10.599	10.29	8.8	8.8	-0.312443	-0.005274	-0.30717
YDR151C	CTH1	6.965	6.85	7	7.1	-0.118246	0.099649	-0.21789
YDR152W	GIR2	7.597	8.33	8	8	0.730007	0.081286	0.64872
YDR153C	ENT5	8.495	9.26	7.5	7.6	0.761772	0.137589	0.62418
YDR155C	CPR1	12.846	13.27	12.4	11.7	0.422832	-0.660402	1.08323
YDR156W	RPA14	8.475	9.12	7.6	7.5	0.649365	-0.120932	0.7703
YDR158W	HOM2	11.369	11.96	10.6	10.5	0.59486	-0.068114	0.66297
YDR159W	SAC3	6.956	5.45	7.5	7.7	-1.501	0.217954	-1.71895
YDR160W	SSY1	5.081	2.98	7.1	7	-2.10379	-0.086008	-2.01778
YDR161W		8.105	8.53	8.8	8.8	0.428026	-0.012202	0.44023
YDR162C	NBP2	5.744	5.7	5.9	6.1	-0.039367	0.251246	-0.29061
YDR163W	CWC15	5.418	6.06	6	5.8	0.642443	-0.206765	0.84921
YDR164C	SEC1	6.999	5.96	7.2	7.3	-1.03764	0.128779	-1.16642
YDR165W	TRM82	8.672	8.58	8.6	8.9	-0.094829	0.29465	-0.38948
YDR166C	SEC5	7.113	7.38	6.8	7.3	0.267916	0.499863	-0.23195
YDR167W	TAF10	7.096	7.69	7.8	7.3	0.597583	-0.479956	1.07754
YDR168W	CDC37	8.66	9.12	8.2	7.9	0.456868	-0.285475	0.74234
YDR169C	STB3	7.235	5.79	6.5	7.4	-1.44887	0.886951	-2.33582
YDR170C	SEC7	10.331	7.89	9.4	9.2	-2.44018	-0.200743	-2.23944
YDR170W-A		9.291	8.43	6.8	7	-0.860591	0.127364	-0.98795
YDR171W	HSP42	9.418	9.66	7.7	7.8	0.245558	0.081105	0.16445
YDR172W	SUP35	11.202	11.1	10.1	10.1	-0.102708	0.019463	-0.12217
YDR173C	ARG82	4.374	5.06	5.5	5.3	0.687686	-0.199384	0.88707
YDR174W	HMO1	9.56	10.63	9.2	9.7	1.07266	0.481467	0.5912
YDR175C	RSM24	7.544	8.01	7	6.6	0.464029	-0.414894	0.87892
YDR176W	NGG1	6.547	6.07	7.3	7.6	-0.472083	0.248371	-0.72045
YDR177W	UBC1	8.625	8.5	8.5	8.1	-0.124176	-0.425954	0.30178
YDR178W	SDH4	7.463	6.78	7.4	6.8	-0.678712	-0.604368	-0.07434
YDR179W-A		4.237	4.85	6.2	6.5	0.608281	0.264497	0.34378
YDR180W	SCC2	6.819	3.77	6.9	6.9	-3.04686	-0.023623	-3.02324
YDR181C	SAS4	5.407	5.09	6.7	6.4	-0.318879	-0.221827	-0.09705
YDR182W	CDC1	8.186	8.02	7.6	7.1	-0.167999	-0.408048	0.24005
YDR183W	PLP1	5.611	6.14	5.9	5.8	0.524102	-0.006682	0.53078
YDR184C	ATC1	6.871	6.54	7.3	7.6	-0.333155	0.282406	-0.61556
YDR185C	UPS3	6.116	5.21	6	5.9	-0.908892	-0.04675	-0.86214
YDR186C		7.402	6.48	8.3	8.6	-0.919525	0.247507	-1.16703
YDR188W	CCT6	10.67	10.76	10.1	10.1	0.093551	-0.04861	0.14216
YDR189W	SLY1	8.451	8.7	8.3	8	0.252532	-0.303244	0.55578
YDR190C	RVB1	9.429	9.39	9.3	9.3	-0.033896	0.060123	-0.09402
YDR191W	HST4	6.132	6.5	6.5	5.8	0.363766	-0.74773	1.1115
YDR192C	NUP42	6.279	6.6	5.9	5.7	0.318498	-0.21319	0.53169
YDR194C	MSS116	9.474	8.68	9	8.6	-0.796171	-0.358782	-0.43739
YDR195W	REF2	6.806	6.1	7.4	7.7	-0.710407	0.365209	-1.07562
YDR196C	CAB5	6.302	6.48	7	6.7	0.17295	-0.326121	0.49907
YDR197W	CBS2	5.389	5.03	6.3	6.9	-0.357099	0.577206	-0.9343
YDR198C	RKM2	6.054	7.03	6.8	6.9	0.97724	0.039384	0.93786
YDR200C	VPS64	6.346	4.02	6.3	6.4	-2.32717	0.100217	-2.42739
YDR201W	SPC19	5.185	5.5	5.7	6	0.319552	0.341392	-0.02184
YDR202C	RAV2	6.368	6.02	6.3	6.7	-0.350556	0.316444	-0.667
YDR204W	COQ4	7.329	7.84	6.9	7.1	0.512846	0.162327	0.35052
YDR205W	MSC2	7.206	7.56	6.9	6.9	0.357475	0.001792	0.35568
YDR206W	EBS1	6.111	5.2	8.5	9	-0.912763	0.435627	-1.34839
YDR207C	UME6	6.054	4.96	6.5	7.2	-1.09026	0.677233	-1.76749
YDR208W	MSS4	7.681	7.77	8	8.6	0.086651	0.515682	-0.42903
YDR210W		7.043	8.32	5.7	6.5	1.2768	0.882777	0.39402
YDR211W	GCD6	9.082	8.46	9	9.3	-0.61988	0.292109	-0.91199
YDR212W	TCP1	10.397	9.99	9.9	9.7	-0.404593	-0.192426	-0.21217
YDR213W	UPC2	6.311	5.22	7.6	7.7	-1.09529	0.070737	-1.16603
YDR214W	AHA1	8.313	7.05	8.1	8.3	-1.26028	0.186305	-1.44658
YDR216W	ADR1	9.016	8.16	8.3	9.1	-0.857913	0.742953	-1.60087
YDR217C	RAD9	7.074	4.85	7.2	7.7	-2.21887	0.42765	-2.64652
YDR219C	MFB1	6.223	4.29	6.4	7.1	-1.9309	0.702119	-2.63301
YDR221W	GTB1	7.427	7.65	7.2	7.6	0.22151	0.384851	-0.16334
YDR222W		5.546	6.42	5.6	6	0.876103	0.384768	0.49134
YDR224C	HTB1	10.727	11.55	10.5	10.4	0.824919	-0.143601	0.96852
YDR225W	HTA1	10.77	11.75	10.8	11.1	0.984715	0.225831	0.75888
YDR226W	ADK1	11.276	11.27	10.4	9.8	-0.004549	-0.585768	0.58122
YDR227W	SIR4	6.863	6.39	6.8	7.1	-0.469027	0.298631	-0.76766
YDR228C	PCF11	6.939	6.51	7.3	7.4	-0.431306	0.088979	-0.52029
YDR229W	IVY1	7.234	7.49	7.4	8	0.256996	0.613225	-0.35623
YDR231C	COX20	6.445	6.07	7	6.5	-0.374416	-0.474484	0.10007
YDR232W	HEM1	9.672	8.27	9.3	9.1	-1.40163	-0.232695	-1.16894
YDR233C	RTN1	10.811	11.35	9.9	10	0.536602	0.065233	0.47137
YDR234W	LYS4	8.301	8.56	8.4	8.7	0.256526	0.247521	0.00901
YDR235W	PRP42	6.816	7.44	7.2	7.3	0.624937	0.044867	0.58007
YDR236C	FMN1	6.312	7.2	6.4	6.7	0.886114	0.329458	0.55666
YDR237W	MRPL7	7.187	5.65	7.1	6.4	-1.53693	-0.613546	-0.92338
YDR238C	SEC26	10.533	10.22	9.4	9.6	-0.313742	0.246912	-0.56065
YDR239C		6.303	7.26	6.6	6.9	0.955614	0.238489	0.71712
YDR240C	SNU56	6.374	6.54	7.1	7	0.166246	-0.113083	0.27933
YDR242W	AMD2	2.938	3.77	5.8	5.7	0.828628	-0.12571	0.95434
YDR243C	PRP28	6.597	7.37	7	7.2	0.771701	0.213926	0.55778
YDR244W	PEX5	7.496	7.76	7.8	7.4	0.266745	-0.41612	0.68287
YDR245W	MNN10	8.447	7.9	8.8	9	-0.543476	0.141141	-0.68462
YDR246W	TRS23	6.509	6.81	5.9	5.6	0.298557	-0.265826	0.56438
YDR248C		5.355	5.33	6.2	6.3	-0.021527	0.062829	-0.08436
YDR249C		4.854	5.17	6.7	6.6	0.320331	-0.087174	0.4075
YDR251W	PAM1	8.427	5.14	7.9	8.2	-3.28407	0.242794	-3.52686
YDR254W	CHL4	4.609	3.13	5.4	6.1	-1.48027	0.712591	-2.19286
YDR255C	RMD5	5.147	5.13	4.8	5	-0.018924	0.231651	-0.25058
YDR257C	RKM4	6.827	7.74	7.6	7.8	0.909553	0.1287	0.78085
YDR258C	HSP78	8.633	9.15	7.5	6.8	0.521164	-0.640915	1.16208
YDR260C	SWM1	6.607	6.67	6.7	6.5	0.062355	-0.179853	0.24221
YDR261C	EXG2	7.407	6.62	7	7.3	-0.786821	0.222519	-1.00934
YDR262W		7.784	8.39	8	7.5	0.606311	-0.412741	1.01905
YDR264C	AKR1	8.949	8.34	8.9	9	-0.607604	0.155183	-0.76279
YDR265W	PEX10	4.889	4.83	6.2	6.8	-0.055936	0.549103	-0.60504
YDR266C		7.778	5.27	7.8	8.1	-2.51123	0.337725	-2.84896
YDR267C	CIA1	7.102	7.31	7.7	7.5	0.204	-0.179959	0.38396
YDR268W	MSW1	6.268	5.89	7.1	6.8	-0.379849	-0.29373	-0.08612
YDR270W	CCC2	6.402	6.26	5.7	5.2	-0.138874	-0.48835	0.34948
YDR272W	GLO2	8.378	8.57	7.8	7.5	0.190063	-0.352975	0.54304
YDR275W	BSC2	5.361	5.4	7.3	7.2	0.039746	-0.136979	0.17673
YDR276C	PMP3	9.504	10.06	9.4	8.7	0.559825	-0.636454	1.19628
YDR277C	MTH1	6.133	6.71	5.4	5.3	0.573645	-0.017453	0.5911
YDR279W	RNH202	6.401	5.12	6.8	6.9	-1.28419	0.168174	-1.45237
YDR280W	RRP45	7.215	8.11	7.8	8	0.894523	0.191503	0.70302
YDR282C		5.287	5.21	6	5.7	-0.079289	-0.344832	0.26554
YDR283C	GCN2	7.117	6.16	7.7	7.7	-0.958012	-0.003366	-0.95465
YDR284C	DPP1	7.844	4.97	7.9	8	-2.87109	0.041771	-2.91287
YDR285W	ZIP1	3.368	4.25	4.7	5.4	0.882696	0.682609	0.20009
YDR287W	INM2	6.068	6.56	6.2	6.5	0.493571	0.317422	0.17615
YDR288W	NSE3	5.699	5.52	6.4	7	-0.179906	0.582818	-0.76272
YDR289C	RTT103	6.668	6.81	5.8	6.1	0.139862	0.268127	-0.12827
YDR291W	HRQ1	6.327	7.07	7.2	7.8	0.739515	0.5672	0.17231
YDR292C	SRP101	8.535	5.65	8.7	8.7	-2.8829	0.005603	-2.8885
YDR293C	SSD1	9.514	9.01	8.8	8.9	-0.499973	0.029793	-0.52977
YDR294C	DPL1	8.953	8.97	8.4	8.4	0.019161	0.004436	0.01473
YDR295C	HDA2	6.483	5.67	6.8	7.4	-0.810961	0.506844	-1.3178
YDR296W	MHR1	7.492	8.26	8	7.1	0.766687	-0.833739	1.60043
YDR297W	SUR2	9.848	9.74	9.1	8.7	-0.103758	-0.403092	0.29933
YDR298C	ATP5	9.124	8	8.5	8.3	-1.12325	-0.184721	-0.93852
YDR299W	BFR2	8.725	9.63	8.6	8.8	0.900437	0.144299	0.75614
YDR300C	PRO1	8.155	8.48	8.4	8.1	0.329123	-0.240998	0.57012
YDR301W	CFT1	7.905	7.51	7.3	7.7	-0.392117	0.386316	-0.77843
YDR302W	GPI11	6.748	7.19	6.9	6.4	0.440881	-0.442979	0.88386
YDR303C	RSC3	7.955	7.55	7.8	8.3	-0.401078	0.55577	-0.95685
YDR304C	CPR5	9.893	10.68	9.4	9	0.791781	-0.308078	1.09986
YDR305C	HNT2	6.635	6.89	5.9	5.5	0.25208	-0.445254	0.69733
YDR306C		6.43	6.55	7.5	7.1	0.115394	-0.406879	0.52227
YDR307W		7.399	7.49	6.7	6.7	0.091671	-0.042411	0.13408
YDR308C	SRB7	6.145	7.18	6.7	6.2	1.03685	-0.518919	1.55577
YDR309C	GIC2	8.692	9.24	8.1	8	0.543902	-0.062877	0.60678
YDR310C	SUM1	7.491	6.13	7.5	7.8	-1.35695	0.332926	-1.68988
YDR311W	TFB1	6.859	5.51	6.8	7.7	-1.3466	0.873439	-2.22004
YDR312W	SSF2	7.775	8.34	8.1	7.8	0.563836	-0.306493	0.87033
YDR313C	PIB1	5.849	5.63	6.4	5.9	-0.220091	-0.514835	0.29474
YDR315C	IPK1	3.768	2.34	4.9	5	-1.42802	0.089635	-1.51765
YDR316W	OMS1	6.003	6.23	6.1	6.1	0.229595	-0.008193	0.23779
YDR318W	MCM21	4.748	5.58	5.9	5.8	0.828099	-0.083453	0.91155
YDR319C		5.643	5.48	6.2	6.2	-0.163133	0.00346	-0.16659
YDR320C	SWA2	7.497	8.12	6.4	6.8	0.618182	0.364581	0.2536
YDR320C-A	DAD4	6.172	6.61	6.8	6.6	0.439159	-0.213117	0.65228
YDR321W	ASP1	9.741	10.3	9.4	9.4	0.563096	-0.029463	0.59256
YDR322C-A	TIM11	7.154	7.34	7.4	6.8	0.190457	-0.618794	0.80925
YDR322W	MRPL35	7.575	7.77	7.1	6.8	0.190669	-0.314236	0.50491
YDR323C	PEP7	4.611	5.55	6	5.7	0.940191	-0.306234	1.24642
YDR324C	UTP4	9.14	9.83	9.4	9.4	0.689632	-0.01783	0.70746
YDR325W	YCG1	6.644	7	7.1	7.2	0.35147	0.120867	0.2306
YDR326C	YSP2	7.784	6.68	8.2	8.5	-1.1069	0.246646	-1.35355
YDR328C	SKP1	8.817	8.73	9.1	8.8	-0.089115	-0.322383	0.23327
YDR329C	PEX3	7.135	8.01	7.2	7.3	0.878444	0.109732	0.76871
YDR330W	UBX5	7.569	6.98	7	6.9	-0.590122	-0.122747	-0.46738
YDR331W	GPI8	7.609	7.97	7.5	7.6	0.359833	0.059055	0.30078
YDR332W	IRC3	4.445	4.91	6.6	6.5	0.469714	-0.09706	0.56677
YDR333C		7.899	7.07	8.5	8.9	-0.824894	0.391925	-1.21682
YDR334W	SWR1	6.681	6.67	8.1	8	-0.015676	-0.14205	0.12637
YDR335W	MSN5	8.446	6.42	8.5	8.5	-2.02623	0.01989	-2.04612
YDR336W		5.539	5.47	6.9	6.6	-0.068019	-0.279331	0.21131
YDR337W	MRPS28	7.124	7.17	7.3	7	0.041061	-0.352505	0.39357
YDR338C		6.262	6.82	6.9	7.1	0.555448	0.181324	0.37412
YDR339C	FCF1	7.936	8.79	8.1	7.9	0.851998	-0.214885	1.06688
YDR341C		10.974	11.38	10.1	10	0.401273	-0.108998	0.51027
YDR342C	HXT7	12.16	12.13	10.6	9.9	-0.026325	-0.698557	0.67223
YDR343C	HXT6	12.114	12.11	10.5	9.8	-0.002605	-0.65956	0.65695
YDR345C	HXT3	12.858	13.49	11.6	11.4	0.628554	-0.201112	0.82967
YDR346C	SVF1	10.048	9.43	10.1	10.1	-0.618916	-0.025826	-0.59309
YDR347W	MRP1	7.896	6.19	7.5	7.3	-1.7078	-0.111848	-1.59596
YDR348C		7.784	6.97	8.1	8.3	-0.818842	0.156511	-0.97535
YDR349C	YPS7	7.777	5.46	8.2	8.3	-2.31959	0.135343	-2.45494
YDR350C	ATP22	5.786	5.73	7.3	7.4	-0.053416	0.088431	-0.14185
YDR351W	SBE2	7.205	6.8	7.6	8.1	-0.407633	0.442552	-0.85018
YDR352W		7.087	7.51	7.6	7.9	0.42798	0.313257	0.11472
YDR353W	TRR1	10.816	11.72	10.2	10.2	0.900932	-0.078376	0.97931
YDR354W	TRP4	8.092	7.42	8.4	8.1	-0.667207	-0.230406	-0.4368
YDR356W	SPC110	6.515	6.93	5.4	6.5	0.419444	1.1528	-0.73335
YDR357C	CNL1	4.983	4.58	5.5	5.3	-0.404047	-0.126285	-0.27776
YDR358W	GGA1	7.401	7.17	7	6.7	-0.234777	-0.23334	-0.00144
YDR359C	EAF1	5.713	5.03	5.7	6.5	-0.681388	0.779004	-1.46039
YDR361C	BCP1	8.639	9.43	8.5	8.6	0.791325	0.083977	0.70735
YDR362C	TFC6	5.919	5.43	7.2	7	-0.487444	-0.213374	-0.27407
YDR363W	ESC2	5.053	4.57	6.4	6.6	-0.482283	0.239826	-0.72211
YDR363W-A	SEM1	7.3	8.29	7.6	7.2	0.987137	-0.39104	1.37818
YDR364C	CDC40	6.028	6.24	7.4	7.4	0.215988	-0.049468	0.26546
YDR365C	ESF1	8.614	8.51	9.5	9.7	-0.105679	0.240732	-0.34641
YDR366C		3.694	5.66	6.9	7.8	1.96892	0.918637	1.05028
YDR367W	KEI1	6.615	6.24	7.1	6.9	-0.378757	-0.209444	-0.16931
YDR368W	YPR1	9.222	9.2	8.4	7.9	-0.023946	-0.475087	0.45114
YDR369C	XRS2	5.23	5.74	5.5	6.2	0.511768	0.652589	-0.14082
YDR370C		5.98	6.32	7.6	7.5	0.335854	-0.109564	0.44542
YDR371W	CTS2	6.196	2.78	7.1	6.7	-3.41682	-0.413026	-3.0038
YDR372C	VPS74	8.411	6.6	8.2	8.5	-1.81384	0.269434	-2.08328
YDR373W	FRQ1	7.034	5.98	7.4	7.6	-1.0521	0.186508	-1.23861
YDR374W-A		5.138	6.34	5.8	6	1.20031	0.240954	0.95936
YDR375C	BCS1	6.24	5.83	7.4	7.2	-0.412039	-0.208418	-0.20362
YDR376W	ARH1	6.771	6.2	7.6	7.6	-0.567517	0.014378	-0.5819
YDR377W	ATP17	8.483	8.42	8.1	8.1	-0.066697	-0.026983	-0.03971
YDR378C	LSM6	7.321	7.35	7	7.5	0.031603	0.55575	-0.52415
YDR379W	RGA2	7.009	6.82	7.8	7.6	-0.184949	-0.169615	-0.01533
YDR380W	ARO10	7.375	7.23	6.7	6.7	-0.143203	-0.065374	-0.07783
YDR381C-A		4.435	4.71	5	5.3	0.273173	0.32327	-0.0501
YDR381W	YRA1	9.491	7.29	9.4	9.1	-2.19936	-0.295205	-1.90416
YDR382W	RPP2B	11.217	12.38	12.5	12.6	1.15922	0.079107	1.08012
YDR383C	NKP1	5.326	5.63	5.2	5.9	0.302721	0.659458	-0.35674
YDR384C	ATO3	9.429	9.89	8.9	8.8	0.461412	-0.106729	0.56814
YDR385W	EFT2	15.307	15.9	13.7	14	0.595048	0.233671	0.36138
YDR386W	MUS81	4.655	5.55	6.2	6.1	0.89719	-0.05744	0.95463
YDR387C		5.126	4.15	6.8	6.8	-0.971404	-0.040047	-0.93136
YDR388W	RVS167	9.91	9.79	9	9	-0.115279	0.048436	-0.16371
YDR389W	SAC7	7.782	5.63	7.3	7.7	-2.15243	0.410687	-2.56311
YDR390C	UBA2	7.799	7.96	8.3	8.3	0.161992	0.027834	0.13416
YDR391C		7.046	6.49	6.8	6.3	-0.558634	-0.490833	-0.0678
YDR392W	SPT3	6.193	6.6	6.7	6.7	0.409462	0.063416	0.34605
YDR393W	SHE9	5.437	4.53	6.2	6.5	-0.907705	0.310852	-1.21856
YDR394W	RPT3	9.56	9.39	9.5	8.9	-0.166054	-0.556218	0.39016
YDR395W	SXM1	9.56	9.37	8.9	9.4	-0.188434	0.437544	-0.62598
YDR397C	NCB2	6.815	6.39	6.9	7.3	-0.429489	0.411293	-0.84078
YDR398W	UTP5	9.288	9.68	9.6	9.8	0.396513	0.186306	0.21021
YDR399W	HPT1	9.536	9.52	9.5	9.4	-0.012488	-0.060427	0.04794
YDR400W	URH1	7.184	7.43	6.5	6.5	0.2498	-0.087239	0.33704
YDR404C	RPB7	7.143	4.96	7.3	7.1	-2.17799	-0.253043	-1.92494
YDR405W	MRP20	7.007	7.29	7.3	6.9	0.278751	-0.403689	0.68244
YDR406W	PDR15	7.448	7.87	7.1	7.1	0.418033	0.009383	0.40865
YDR407C	TRS120	7.239	4.99	7.5	7.7	-2.2456	0.211023	-2.45663
YDR408C	ADE8	7.801	6.91	8.4	7.9	-0.891059	-0.46368	-0.42738
YDR409W	SIZ1	5.264	5.62	6.2	6.3	0.354494	0.127114	0.22738
YDR410C	STE14	6.471	6.84	7.3	7.5	0.365778	0.221538	0.14424
YDR411C	DFM1	7.448	7.99	7.3	7.6	0.542832	0.318108	0.22472
YDR412W	RRP17	7.918	7.62	7.4	7.5	-0.29716	0.062851	-0.36001
YDR414C	ERD1	5.223	4.64	6.4	6.7	-0.580394	0.325931	-0.90632
YDR415C		7.031	8.22	7.1	6.6	1.1921	-0.417491	1.60959
YDR416W	SYF1	6.848	6.8	7.4	7.8	-0.049824	0.411222	-0.46105
YDR418W	RPL12B	12.132	12.74	12.1	12	0.607249	-0.112808	0.72006
YDR419W	RAD30	5.964	5.8	7	7	-0.164122	-0.05441	-0.10971
YDR420W	HKR1	8.41	8.25	7.7	7.8	-0.16454	0.098843	-0.26338
YDR421W	ARO80	5.368	4.99	6.3	6.5	-0.377312	0.293114	-0.67043
YDR422C	SIP1	7.077	5.61	7.3	7.3	-1.46845	-0.009357	-1.45909
YDR423C	CAD1	6.337	7.97	6.5	6.3	1.63678	-0.236995	1.87378
YDR424C	DYN2	6.401	7.6	6.2	6.3	1.1983	0.086989	1.11131
YDR425W	SNX41	6.188	6.39	5.9	5.8	0.204166	-0.07356	0.27773
YDR427W	RPN9	9.167	9.46	9.2	8.6	0.295044	-0.541372	0.83642
YDR428C	BNA7	5.971	6.2	6.1	6.2	0.2277	0.102103	0.1256
YDR429C	TIF35	9.79	10.73	10.1	9.9	0.940749	-0.203752	1.1445
YDR430C	CYM1	7.904	7.61	7.9	7.8	-0.297739	-0.169677	-0.12806
YDR432W	NPL3	11.143	11.81	10.1	9.9	0.670173	-0.200531	0.8707
YDR434W	GPI17	8.123	5.65	8.3	7.7	-2.47584	-0.520702	-1.95514
YDR435C	PPM1	6.728	6.36	6.9	7.2	-0.364038	0.339373	-0.70341
YDR436W	PPZ2	6.642	5.89	6.4	6.9	-0.755201	0.443196	-1.1984
YDR438W	THI74	-29.9	1.34	5.4	5.9	31.2407	0.485146	30.7555
YDR439W	LRS4	5.625	5.57	5.6	5.5	-0.050067	-0.08783	0.03776
YDR440W	DOT1	5.479	4.2	6.2	6.7	-1.27796	0.49341	-1.77137
YDR441C	APT2	5.656	4.84	5.7	6.4	-0.817546	0.738506	-1.55605
YDR443C	SSN2	6.85	5.16	6.9	7.1	-1.68497	0.159036	-1.84401
YDR444W		5.527	5.49	6.9	7.3	-0.033095	0.385325	-0.41842
YDR447C	RPS17B	11.988	12.47	11.4	11.7	0.483185	0.300755	0.18243
YDR448W	ADA2	7.1	7.64	7.5	7.5	0.539473	-0.00939	0.54886
YDR449C	UTP6	8.02	9.2	8.1	8.7	1.1778	0.581936	0.59586
YDR450W	RPS18A	12.301	13.24	11.2	11.7	0.941195	0.536362	0.40483
YDR451C	YHP1	6.972	7.56	7.4	7.2	0.591701	-0.212336	0.80404
YDR452W	PPN1	8.64	6.84	8.8	8.3	-1.79765	-0.424444	-1.37321
YDR453C	TSA2	7.083	6.58	6.2	5.3	-0.505091	-0.918679	0.41359
YDR454C	GUK1	9.849	10.25	9.1	9.1	0.398127	0.021322	0.37681
YDR456W	NHX1	7.726	8.18	8	7.9	0.450877	-0.141691	0.59257
YDR457W	TOM1	9.717	10.24	8.6	8.6	0.523983	0.041615	0.48237
YDR458C	HEH2	7.17	7.57	7.3	7.7	0.400909	0.318629	0.08228
YDR459C	PFA5	4.461	3.75	6.9	6.9	-0.7068	0.012614	-0.71941
YDR460W	TFB3	6.671	5.75	6.6	6.6	-0.924708	-0.052523	-0.87218
YDR461C-A		4.835	5.29	5.5	5	0.453144	-0.493887	0.94703
YDR461W	MFA1	7.899	8.23	7.2	6.7	0.33509	-0.436342	0.77143
YDR462W	MRPL28	6.683	7.03	6.2	6.3	0.343933	0.071786	0.27215
YDR463W	STP1	8.659	9.2	8	8	0.537506	0.038199	0.49931
YDR464W	SPP41	6.866	7.55	7.8	8.1	0.688252	0.274985	0.41327
YDR465C	RMT2	7.883	8.4	8.8	8.8	0.512632	0.039348	0.47328
YDR466W	PKH3	6.931	5.53	7.6	7.6	-1.40355	0.003929	-1.40748
YDR468C	TLG1	6.393	7.04	7	7	0.643922	-0.054991	0.69891
YDR469W	SDC1	5.456	6.12	6.5	6.7	0.661122	0.185688	0.47543
YDR470C	UGO1	6.842	6.49	6.3	6	-0.355638	-0.25917	-0.09647
YDR471W	RPL27B	11	11.86	10.3	10.7	0.862382	0.402236	0.46015
YDR472W	TRS31	7.029	7.32	7.2	7.2	0.28759	-0.019445	0.30703
YDR473C	PRP3	5.293	6.02	5.8	5.9	0.728047	0.121819	0.60623
YDR475C	JIP4	6.766	5.73	7.1	7.6	-1.03709	0.409661	-1.44675
YDR476C		7.363	7.79	7.1	7	0.426702	-0.052772	0.47947
YDR477W	SNF1	8.519	6.98	8.2	8.3	-1.54022	0.106847	-1.64707
YDR478W	SNM1	4.828	6.13	4.6	5.5	1.29972	0.931927	0.3678
YDR479C	PEX29	5.966	6.14	6.4	6.6	0.169657	0.131617	0.03804
YDR480W	DIG2	5.203	4.68	5	5.6	-0.525964	0.578163	-1.10413
YDR481C	PHO8	8.88	8.81	8.2	7.7	-0.073503	-0.567716	0.49421
YDR482C	CWC21	6.443	5.87	7.2	6.6	-0.575512	-0.561398	-0.01411
YDR483W	KRE2	10.574	10.26	9.8	9.7	-0.312041	-0.09182	-0.22022
YDR484W	VPS52	6.416	6.77	6	6.1	0.350361	0.089848	0.26051
YDR485C	VPS72	6.684	7.28	7.2	7.4	0.59737	0.209469	0.3879
YDR486C	VPS60	7.427	7.83	7.1	7.1	0.400928	-0.06143	0.46236
YDR487C	RIB3	8.806	9.08	8.8	8.6	0.276104	-0.232682	0.50879
YDR488C	PAC11	5.09	6.21	6.3	6.5	1.11983	0.192255	0.92758
YDR489W	SLD5	6.324	6.34	6.2	6.1	0.012964	-0.048761	0.06172
YDR490C	PKH1	6.548	4.31	7	6.9	-2.24157	-0.100008	-2.14156
YDR492W	IZH1	9.794	9.12	9.7	9.1	-0.669241	-0.62209	-0.04715
YDR493W	MZM1	5.755	4.89	6	5.6	-0.863616	-0.436982	-0.42663
YDR494W	RSM28	7.058	6.58	6.9	7.4	-0.476572	0.475298	-0.95187
YDR495C	VPS3	5.76	6.38	6.2	6.6	0.621767	0.458351	0.16342
YDR496C	PUF6	9.932	10.36	9.7	9.6	0.430464	-0.022244	0.45271
YDR497C	ITR1	11.438	8.97	12.1	11.4	-2.4654	-0.657221	-1.80818
YDR498C	SEC20	6.321	6.85	6.9	7	0.531202	0.151579	0.37962
YDR499W	LCD1	5.231	5.58	6.8	7	0.347654	0.237781	0.10987
YDR500C	RPL37B	11.33	10.61	10.7	10.5	-0.725267	-0.177024	-0.54824
YDR501W	PLM2	4.668	4.32	4.5	4.9	-0.352792	0.359764	-0.71256
YDR502C	SAM2	10.897	10.45	10.1	9.2	-0.448837	-0.978931	0.53009
YDR503C	LPP1	6.313	5.27	6.3	6.1	-1.04246	-0.200094	-0.84237
YDR505C	PSP1	8.406	6.3	6.9	7.2	-2.10319	0.268204	-2.3714
YDR506C		6.397	5.03	5.4	4.8	-1.36609	-0.53283	-0.83326
YDR507C	GIN4	8.279	8.3	7.8	7.9	0.024831	0.123849	-0.09902
YDR508C	GNP1	10.887	10.78	10.5	10.5	-0.10668	-0.016708	-0.08997
YDR510W	SMT3	8.924	9.68	7.9	8.2	0.760189	0.272893	0.4873
YDR511W	ACN9	5.155	6.45	4.7	5.3	1.29078	0.673247	0.61753
YDR512C	EMI1	7.382	8.04	6.4	6.1	0.656221	-0.271279	0.9275
YDR513W	GRX2	9.244	9.24	8.1	7.7	-0.00837	-0.379722	0.37135
YDR514C		7.391	7.29	7.9	7.5	-0.104813	-0.370031	0.26522
YDR515W	SLF1	6.139	5.28	6.4	6.1	-0.861496	-0.236151	-0.62535
YDR516C	EMI2	9.859	9.51	8.8	7.7	-0.352873	-1.11273	0.75986
YDR517W	GRH1	8.048	6.29	8	8.1	-1.75357	0.064463	-1.81804
YDR520C	URC2	5.73	5.37	7	7.4	-0.360936	0.378091	-0.73903
YDR524C	AGE1	6.115	6.08	6.5	6.9	-0.037876	0.420601	-0.45848
YDR524C-B		12.68	14.32	12.1	12.3	1.64306	0.267279	1.37578
YDR527W	RBA50	7.818	7.64	8.3	8.4	-0.178436	0.104209	-0.28264
YDR528W	HLR1	5.439	4.15	6.5	6	-1.28721	-0.568044	-0.71916
YDR529C	QCR7	8.875	9.23	8.7	8	0.357301	-0.776301	1.1336
YDR530C	APA2	6.839	6.75	7.3	6.9	-0.08955	-0.42832	0.33877
YDR531W	CAB1	7.243	7.48	8.1	7.9	0.241757	-0.150904	0.39266
YDR532C	KRE28	5.121	4.87	5.9	6.2	-0.248713	0.22783	-0.47654
YDR533C	HSP31	8.42	9.43	7.4	7.8	1.01345	0.352061	0.66139
YDR538W	PAD1	5.422	6.7	5.5	6	1.27967	0.529181	0.75049
YDR539W	FDC1	7.668	7.39	8	7.1	-0.277938	-0.912401	0.63446
YDR541C		4.253	2.32	6.1	5.6	-1.92985	-0.504946	-1.42491
YDR545W	YRF1-1	9.245	9.87	11.4	11	0.6259	-0.4021	1.028
YEL001C	IRC22	8.826	9.93	8.9	8.7	1.10097	-0.16179	1.26276
YEL002C	WBP1	9.897	9.36	9.5	9.3	-0.539503	-0.194722	-0.34478
YEL003W	GIM4	6.68	7.89	6.3	6.8	1.20546	0.527691	0.67777
YEL005C	VAB2	3.882	4.68	5.1	5.5	0.802343	0.421901	0.38044
YEL006W	YEA6	5.807	6.25	7.3	7.4	0.438876	0.099835	0.33904
YEL007W		5.71	6.22	5.8	6.4	0.510853	0.555037	-0.04418
YEL009C	GCN4	6.832	7.11	11.3	11.8	0.275009	0.588005	-0.313
YEL011W	GLC3	9.198	8.2	7.5	6.3	-0.998779	-1.19896	0.20018
YEL012W	UBC8	5.944	6.38	6	6	0.432017	0.053039	0.37898
YEL013W	VAC8	8.865	6.98	8.4	8.4	-1.88829	0.039127	-1.92742
YEL015W	EDC3	8.186	8.47	8.2	8.4	0.288845	0.204138	0.08471
YEL016C	NPP2	4.326	3.75	7	7	-0.578509	-0.067069	-0.51144
YEL017C-A	PMP2	8.968	9.2	8.2	7.7	0.230593	-0.493268	0.72386
YEL017W	GTT3	6.419	7.15	6.4	6.8	0.729741	0.391863	0.33788
YEL018W	EAF5	5.857	6.83	6.7	6.8	0.971499	0.162285	0.80921
YEL020C		5.439	5.21	6.6	6.5	-0.234066	-0.071716	-0.16235
YEL020W-A	TIM9	6.752	6.91	6.3	6.1	0.15596	-0.22034	0.3763
YEL022W	GEA2	8.48	5.83	8.4	8.4	-2.65261	0.056109	-2.70872
YEL023C		0.383	1.37	5.9	6.3	0.990872	0.357018	0.63385
YEL024W	RIP1	8.053	8.39	7.5	6.7	0.334609	-0.821645	1.15625
YEL025C		5.928	6.38	7.9	7.9	0.446653	0.078293	0.36836
YEL026W	SNU13	10.55	11.29	8.8	9.3	0.737856	0.422695	0.31516
YEL027W	VMA3	11.559	12.2	10	10.4	0.639051	0.364709	0.27434
YEL029C	BUD16	6.747	6.66	7	7	-0.082724	0.03324	-0.11596
YEL030W	ECM10	1.179	3.76	5.1	5.7	2.58196	0.600802	1.98116
YEL031W	SPF1	11.086	11.33	9.9	10	0.24677	0.086308	0.16046
YEL032W	MCM3	8.934	8.18	8.6	8.7	-0.749215	0.137868	-0.88708
YEL036C	ANP1	9.106	7.5	9.2	9.2	-1.60307	0.018967	-1.62203
YEL037C	RAD23	9.518	9.17	9.5	8.9	-0.343654	-0.582985	0.23933
YEL038W	UTR4	7.474	7.86	7.5	7.6	0.387097	0.082978	0.30412
YEL040W	UTR2	10.685	11.52	11	10.8	0.838364	-0.194526	1.03289
YEL042W	GDA1	9.438	6.79	8.2	8.2	-2.64992	-0.010352	-2.63957
YEL043W		7.222	6.47	7.2	7.6	-0.753501	0.43246	-1.18596
YEL044W	IES6	7.093	6.23	8.1	7.7	-0.860549	-0.394614	-0.46593
YEL046C	GLY1	11.822	11.92	10.3	10.3	0.102341	-0.052243	0.15458
YEL047C		9.244	9.65	8.5	8.1	0.410343	-0.37578	0.78612
YEL048C	TCA17	4.516	5.74	6.1	6.5	1.22736	0.351525	0.87583
YEL050C	RML2	7.206	6.27	7.5	7.6	-0.937512	0.098152	-1.03566
YEL051W	VMA8	9.512	10.02	9.4	9.3	0.504046	-0.087852	0.5919
YEL052W	AFG1	7.327	6.99	7.7	8	-0.334406	0.330317	-0.66472
YEL053C	MAK10	6.956	5.8	7	7.4	-1.15279	0.405459	-1.55825
YEL054C	RPL12A	11.701	12.36	12	11.9	0.662742	-0.134096	0.79684
YEL055C	POL5	9.329	9.18	8.5	8.9	-0.149213	0.377293	-0.52651
YEL056W	HAT2	7.427	7.82	7	7.3	0.389523	0.277989	0.11153
YEL058W	PCM1	9.261	9.18	9.2	9.1	-0.078478	-0.065394	-0.01308
YEL060C	PRB1	10.526	10.11	9.2	8.6	-0.416489	-0.586226	0.16974
YEL061C	CIN8	5.944	6.26	6	7.1	0.320133	1.1128	-0.79267
YEL062W	NPR2	5.802	6.44	6.4	6.6	0.642385	0.1717	0.47069
YEL063C	CAN1	9.264	8.75	8.5	8.6	-0.509335	0.151894	-0.66123
YEL064C	AVT2	5.099	5.14	5.1	5.2	0.041494	0.130022	-0.08853
YEL065W	SIT1	6.905	6.71	8	7.3	-0.196205	-0.695326	0.49912
YEL066W	HPA3	7.104	7.7	6.8	6.4	0.595068	-0.387498	0.98257
YEL071W	DLD3	10.617	10.88	10	10.2	0.26479	0.112557	0.15223
YEL072W	RMD6	1.527	0.75	4.7	4.8	-0.772727	0.095009	-0.86774
YEL073C		5.408	2.35	6.9	4.4	-3.05552	-2.48928	-0.56623
YEL075C		4.809	4.59	5.1	4.6	-0.219847	-0.496044	0.2762
YEL077C		8.501	9.19	10.9	10.3	0.688617	-0.528778	1.2174
YER001W	MNN1	8.848	8.95	8.6	8.3	0.105412	-0.316288	0.4217
YER002W	NOP16	8.148	9.31	7.9	7.9	1.16634	0.037916	1.12842
YER003C	PMI40	10.405	10.92	8.7	8.7	0.510765	-0.045587	0.55635
YER004W	FMP52	8.527	9.12	8.9	8.5	0.588662	-0.44248	1.03114
YER005W	YND1	6.697	5.26	8	8.1	-1.43973	0.055011	-1.49474
YER006W	NUG1	9.971	10.92	10	9.9	0.946612	-0.075187	1.0218
YER007C-A	TMA20	8.179	8.9	7.9	7.7	0.717317	-0.157061	0.87438
YER007W	PAC2	5.013	5.18	5.6	5.6	0.169914	0.040286	0.12963
YER008C	SEC3	7.723	7.71	7.9	8.2	-0.013992	0.340912	-0.3549
YER009W	NTF2	10.241	11.15	9.3	9.8	0.905826	0.507804	0.39802
YER010C		6.147	4.69	7.2	6.4	-1.46013	-0.776155	-0.68397
YER011W	TIR1	6.55	5.25	5.6	4.5	-1.30052	-1.14046	-0.16005
YER012W	PRE1	8.612	9.01	8.2	7.9	0.394684	-0.282456	0.67714
YER013W	PRP22	6.882	7.68	7.3	7.2	0.793501	-0.105301	0.8988
YER014W	HEM14	7.078	6.62	6.9	7.2	-0.462503	0.245809	-0.70831
YER015W	FAA2	6.592	6.56	6.4	6.5	-0.03341	0.118983	-0.15239
YER016W	BIM1	6.833	5.66	7	7.3	-1.17637	0.324515	-1.50088
YER017C	AFG3	8.489	6.66	8	8.2	-1.82851	0.177125	-2.00564
YER018C	SPC25	5.775	4.09	6.2	6.8	-1.68267	0.548657	-2.23132
YER019C-A	SBH2	8.191	7.3	8.5	8.3	-0.889853	-0.195516	-0.69434
YER019W	ISC1	7.458	8	8	7.8	0.545872	-0.148842	0.69471
YER020W	GPA2	7.4	7.85	6.9	6.9	0.449566	0.027267	0.4223
YER021W	RPN3	9.759	9.34	9.7	9.4	-0.421926	-0.298639	-0.12329
YER022W	SRB4	7.018	7.58	7.4	7.3	0.557442	-0.111125	0.66857
YER025W	GCD11	10.842	10.86	9.9	10	0.01881	0.058402	-0.03959
YER026C	CHO1	10.348	10.38	10.5	9.6	0.035354	-0.946523	0.98188
YER027C	GAL83	8.568	7.83	7.1	7.2	-0.741955	0.093169	-0.83512
YER028C	MIG3	4.834	6.34	5.8	6.8	1.51049	1.01151	0.49899
YER029C	SMB1	6.406	7.29	6	6.7	0.882093	0.761598	0.12049
YER030W	CHZ1	7.075	8.31	6.7	6.9	1.23272	0.26913	0.96359
YER031C	YPT31	8.71	8.69	8.5	8.3	-0.017294	-0.191906	0.17461
YER032W	FIR1	6.295	6.46	6.1	6.1	0.164578	-0.025731	0.19031
YER033C	ZRG8	5.493	4.79	5.1	5.6	-0.700482	0.578178	-1.27866
YER034W		6.958	7.84	7.1	6.8	0.881038	-0.270904	1.15194
YER035W	EDC2	7.618	7.71	6.7	6.4	0.087543	-0.276141	0.36368
YER036C	ARB1	11.594	11.37	11.1	10.9	-0.22234	-0.183959	-0.03838
YER037W	PHM8	7.397	7.8	7	5.7	0.403114	-1.25974	1.66285
YER038C	KRE29	3.876	4.5	5.7	6	0.624676	0.26761	0.35707
YER040W	GLN3	6.812	6.49	6.8	6.8	-0.321392	-0.040925	-0.28047
YER041W	YEN1	4.21	3.9	6.7	6.5	-0.314995	-0.272408	-0.04259
YER042W	MXR1	6.681	6.96	6.3	5.1	0.275667	-1.22613	1.50179
YER043C	SAH1	13.672	14.34	12	11.9	0.670301	-0.093164	0.76346
YER044C	ERG28	7.082	7.2	6.8	6.3	0.115523	-0.484477	0.6
YER045C	ACA1	4.948	4.7	5.6	5.7	-0.246855	0.062527	-0.30938
YER046W	SPO73	3.428	2.12	5.6	4.9	-1.30418	-0.631184	-0.673
YER047C	SAP1	6.292	6	6.7	7.2	-0.292023	0.557144	-0.84917
YER048C	CAJ1	8.906	9.43	9	8.7	0.524462	-0.302017	0.82648
YER048W-A	ISD11	6.918	6.24	6.6	6.2	-0.679675	-0.398761	-0.28091
YER049W	TPA1	9.745	9.99	9.8	9.5	0.244974	-0.362582	0.60756
YER050C	RSM18	6.226	6.78	6.3	6.2	0.552909	-0.101627	0.65454
YER051W	JHD1	4.614	4.56	6.4	6.5	-0.050661	0.099833	-0.15049
YER052C	HOM3	9.491	8.97	8.9	8.7	-0.52173	-0.240469	-0.28126
YER053C	PIC2	7.967	6.19	8.4	7.5	-1.78066	-0.957495	-0.82316
YER055C	HIS1	10.161	10.65	10.7	10.5	0.486714	-0.229388	0.7161
YER056C	FCY2	11.221	11.66	11.1	11.4	0.442654	0.23526	0.20739
YER056C-A	RPL34A	11.366	12.59	9.8	10.8	1.226	0.941426	0.28458
YER057C	HMF1	8.843	9.67	8.1	8.4	0.828129	0.335951	0.49218
YER058W	PET117	4.928	5.03	4.4	4.9	0.104755	0.519899	-0.41514
YER059W	PCL6	5.954	5.56	6.3	7	-0.393208	0.663512	-1.05672
YER060W	FCY21	6.653	5.33	7.1	6.8	-1.32012	-0.297739	-1.02238
YER060W-A	FCY22	8.714	9.18	8.3	8.5	0.466334	0.238836	0.2275
YER061C	CEM1	6.329	6.79	7.1	6.8	0.460153	-0.330675	0.79083
YER062C	HOR2	11.54	10.83	10.7	9	-0.712681	-1.7353	1.02262
YER063W	THO1	8.088	6.91	7.7	7.5	-1.17412	-0.192002	-0.98212
YER064C		8.258	8.84	7.4	8	0.581334	0.529132	0.0522
YER065C	ICL1	5.251	3.56	6.4	5.8	-1.68683	-0.613868	-1.07296
YER066W	RRT13	3.97	3.05	5.6	5.6	-0.916627	-0.033359	-0.88327
YER068W	MOT2	8.2	8.53	7.8	7.7	0.330001	-0.030696	0.3607
YER069W	ARG5,6	9.307	7.25	8.2	7.2	-2.05436	-1.05429	-1.00007
YER070W	RNR1	10.385	10.72	9.2	9	0.332679	-0.247011	0.57969
YER071C		4.457	5.77	5.1	5.2	1.31041	0.063957	1.24645
YER072W	VTC1	8.458	8.07	7.4	7.3	-0.388021	-0.05912	-0.3289
YER073W	ALD5	10.49	9.12	10	8.5	-1.36868	-1.46774	0.09907
YER074W	RPS24A	12.635	13.44	12	12.2	0.8004	0.210224	0.59018
YER074W-A	YOS1	7.205	7.22	6.1	6.7	0.010363	0.618837	-0.60847
YER075C	PTP3	7.437	6.1	7.5	7.5	-1.33305	-0.038924	-1.29412
YER076C		4.837	4.14	5.7	5.7	-0.695944	-0.065399	-0.63055
YER077C		7.036	7.28	7.5	7.2	0.24042	-0.273447	0.51387
YER078C	ICP55	7.256	5.71	7.3	7	-1.55126	-0.318733	-1.23253
YER079W		6.208	5.55	5.1	4.5	-0.654173	-0.617113	-0.03706
YER080W	AIM9	8.828	8.75	7.7	7.7	-0.077447	-0.007049	-0.0704
YER081W	SER3	9.186	8.9	8.6	8	-0.284209	-0.601399	0.31719
YER082C	UTP7	8.726	9.23	9	9	0.505676	0.014605	0.49107
YER083C	GET2	8.292	8.51	7.8	7.8	0.215309	-0.037701	0.25301
YER086W	ILV1	10.338	10.78	10	9.9	0.438573	-0.0806	0.51917
YER087C-B	SBH1	7.476	7.73	6.6	6.7	0.252779	0.18024	0.07254
YER087W	AIM10	6.453	6.63	6.4	6	0.178336	-0.396978	0.57531
YER088C	DOT6	9.192	7.37	8.1	8.8	-1.82312	0.698695	-2.52181
YER089C	PTC2	8.724	7.31	7.8	8.1	-1.41614	0.304819	-1.72096
YER090W	TRP2	9.754	9.63	9	8.8	-0.119197	-0.196857	0.07766
YER091C	MET6	13.385	12.33	10.7	9.8	-1.05174	-0.915696	-0.13604
YER092W	IES5	6.085	7.46	5.8	6.3	1.37903	0.438612	0.94042
YER093C	TSC11	6.023	5.98	6.8	6.7	-0.040732	-0.142634	0.1019
YER094C	PUP3	9.381	9.11	9.6	9.1	-0.272557	-0.45262	0.18006
YER095W	RAD51	8.028	8.29	7.9	7.5	0.258968	-0.354956	0.61392
YER098W	UBP9	4.991	5.38	4.9	5.6	0.392091	0.733107	-0.34102
YER099C	PRS2	7.799	8.24	7.5	7.8	0.440442	0.225296	0.21515
YER100W	UBC6	8.419	7.8	7.7	7.4	-0.614625	-0.328143	-0.28648
YER101C	AST2	5.678	5.95	5.8	5.3	0.267735	-0.450423	0.71816
YER102W	RPS8B	13.252	14.1	13.6	13.4	0.843388	-0.129321	0.97271
YER103W	SSA4	8.505	9.12	8	8.1	0.619169	0.120765	0.4984
YER105C	NUP157	8.84	8.93	8.6	8.8	0.090899	0.265911	-0.17501
YER107C	GLE2	7.717	6.34	7.9	7.8	-1.37427	-0.08129	-1.29298
YER109C	FLO8	4.764	5.14	7.1	7.7	0.380335	0.567475	-0.18714
YER110C	KAP123	11.571	10.87	10.2	10.4	-0.701931	0.17907	-0.881
YER111C	SWI4	6.594	4.67	5.9	6.5	-1.92412	0.543087	-2.46721
YER112W	LSM4	7.292	7.56	6.4	6.4	0.272087	0.083059	0.18903
YER113C	TMN3	7.026	6.22	7.2	7.4	-0.806347	0.149992	-0.95634
YER114C	BOI2	8.191	6.53	7.7	8.1	-1.66331	0.340083	-2.0034
YER115C	SPR6	2.109	2.38	5.8	6.6	0.265776	0.812856	-0.54708
YER116C	SLX8	4.908	5.34	6.3	6.5	0.432515	0.12726	0.30526
YER117W	RPL23B	12.228	12.87	11.9	11.9	0.645053	0.059519	0.58553
YER118C	SHO1	7.89	6.94	7.3	7.3	-0.947034	0.062596	-1.00963
YER119C	AVT6	7.304	7.89	6.6	6.8	0.587948	0.229774	0.35817
YER120W	SCS2	10.344	10.62	8.8	8.7	0.272616	-0.022554	0.29517
YER122C	GLO3	9.074	8.2	8.8	8.8	-0.874479	0.03036	-0.90484
YER123W	YCK3	7.096	4.48	6.9	7.4	-2.61162	0.455564	-3.06719
YER124C	DSE1	9.076	10.04	9.4	9.6	0.960359	0.210368	0.74999
YER125W	RSP5	9.512	7.09	8.3	8.3	-2.42531	-0.025846	-2.39946
YER126C	NSA2	9.098	9.98	9	9.2	0.882069	0.188011	0.69406
YER127W	LCP5	8.413	9.13	8.7	8.7	0.716685	-0.04486	0.76155
YER129W	SAK1	6.117	5.53	8	8.3	-0.582834	0.28045	-0.86328
YER130C		6.17	7.07	7	7.3	0.902673	0.339327	0.56335
YER131W	RPS26B	11.26	12.15	9.9	10.7	0.889652	0.7368	0.15285
YER132C	PMD1	6.427	6.45	7.2	7.2	0.020801	0.004007	0.01679
YER133W	GLC7	9.751	9.55	9.4	9.6	-0.201963	0.195675	-0.39764
YER134C		6.96	6.97	6.7	6.5	0.007968	-0.149228	0.1572
YER136W	GDI1	9.507	8.19	9.2	8.6	-1.32053	-0.594131	-0.7264
YER138W-A		3.187	4.99	8.1	8.2	1.80148	0.0211	1.78038
YER139C	RTR1	5.605	6.32	5.9	6	0.718927	0.164332	0.55459
YER140W		6.473	6.3	7.3	7.1	-0.175476	-0.151998	-0.02348
YER141W	COX15	8.067	7.21	8.1	7.7	-0.862449	-0.382007	-0.48044
YER142C	MAG1	5.544	4.23	6.2	5.3	-1.31436	-0.865633	-0.44872
YER143W	DDI1	7.375	7.95	7.1	6.7	0.571608	-0.404324	0.97593
YER144C	UBP5	6.362	6.06	6.8	6.8	-0.304074	-0.010267	-0.29381
YER145C	FTR1	8.514	7.99	8.1	8	-0.524343	-0.115661	-0.40868
YER146W	LSM5	8.187	9.05	7.6	7.5	0.858017	-0.058918	0.91694
YER147C	SCC4	6.517	7.26	7.6	7.6	0.740524	0.022846	0.71768
YER148W	SPT15	7.9	6.25	8.9	8.7	-1.64598	-0.178737	-1.46724
YER149C	PEA2	7.056	4.87	7.1	7.1	-2.18645	-0.022311	-2.16414
YER150W	SPI1	10.679	9.6	9.2	7	-1.08227	-2.2145	1.13223
YER151C	UBP3	8.457	8.19	8.3	8.2	-0.269071	-0.114796	-0.15428
YER152C		7.28	7.56	8.4	8.1	0.285003	-0.310934	0.59594
YER153C	PET122	4.381	5.77	5.7	5.4	1.38458	-0.295145	1.67972
YER154W	OXA1	7.834	8.02	7.8	7.6	0.190562	-0.195677	0.38624
YER155C	BEM2	9.037	7.89	8.8	9	-1.14979	0.210821	-1.36061
YER156C		9.447	10.03	9.2	9.1	0.582322	-0.17697	0.75929
YER157W	COG3	6.999	6.65	7.4	7.9	-0.351082	0.51261	-0.86369
YER158C		6.071	5.69	6.1	6.5	-0.376826	0.424195	-0.80102
YER159C	BUR6	6.659	7.4	7.5	7.1	0.740184	-0.409193	1.14938
YER161C	SPT2	5.753	6.22	6.9	6.9	0.468527	-0.049324	0.51785
YER162C	RAD4	6.137	7.33	6.7	6.8	1.19784	0.094536	1.1033
YER163C		6.162	6.74	6.7	7	0.575311	0.3523	0.22301
YER164W	CHD1	8.34	6.42	7.9	8.1	-1.92167	0.210584	-2.13225
YER165W	PAB1	12.226	10.81	10.1	10.3	-1.4191	0.176091	-1.59519
YER166W	DNF1	8.797	7.35	7.9	8.2	-1.44566	0.295784	-1.74144
YER167W	BCK2	6.873	5.61	7.3	7.7	-1.26386	0.409733	-1.6736
YER168C	CCA1	8.359	8.69	7.9	8.1	0.333251	0.212986	0.12026
YER169W	RPH1	7.917	5.98	8.7	9	-1.94141	0.290338	-2.23175
YER170W	ADK2	5.183	5.15	5.6	5.1	-0.037147	-0.478139	0.44099
YER171W	RAD3	7.234	6.01	8.1	8.4	-1.22434	0.34674	-1.57108
YER172C	BRR2	8.072	7.58	7.9	8.3	-0.489778	0.420036	-0.90981
YER173W	RAD24	4.875	5.53	6.8	7.1	0.659124	0.356206	0.30292
YER174C	GRX4	6.812	5.77	7.6	7.6	-1.03885	-0.058236	-0.98062
YER175C	TMT1	6.537	6.37	6.7	6.1	-0.163523	-0.591685	0.42816
YER176W	ECM32	7.581	7.73	7.9	8.3	0.153646	0.464373	-0.31073
YER177W	BMH1	11.983	12.5	11.9	11.3	0.51934	-0.601958	1.1213
YER178W	PDA1	11.713	12.49	10.4	10.3	0.777214	-0.046191	0.82341
YER182W	FMP10	6.615	6.24	6	5.7	-0.370641	-0.275556	-0.09508
YER183C	FAU1	6.366	7.36	7.4	7.1	0.997752	-0.272039	1.26979
YER184C		3.215	4.16	5.6	6.8	0.947287	1.21886	-0.27157
YER186C		2.078	0.77	6.9	6.8	-1.3033	-0.07745	-1.22585
YFL001W	DEG1	7.031	7.65	7.3	7.5	0.620205	0.200046	0.42016
YFL002C	SPB4	7.66	7.72	7.9	8	0.057436	0.126903	-0.06947
YFL004W	VTC2	9.128	8.83	8.7	8.8	-0.298642	0.123724	-0.42237
YFL005W	SEC4	8.926	8.17	8.8	8.4	-0.751553	-0.360071	-0.39148
YFL007W	BLM10	9.493	7.58	9.3	8.9	-1.91157	-0.409348	-1.50222
YFL008W	SMC1	7.846	6.76	6.9	7.6	-1.09007	0.65717	-1.74724
YFL009W	CDC4	7.86	6.49	8.3	8.4	-1.37223	0.091791	-1.46402
YFL010C	WWM1	9.626	10.43	8.6	8	0.80263	-0.555291	1.35792
YFL013C	IES1	7.964	8.35	7.8	7.6	0.388027	-0.186657	0.57468
YFL014W	HSP12	11.3	10.53	10.6	8.1	-0.769006	-2.50518	1.73617
YFL016C	MDJ1	8.014	8.49	7.9	7.2	0.474447	-0.684643	1.15909
YFL017C	GNA1	6.298	7.18	7	6.7	0.880954	-0.288489	1.16944
YFL017W-A	SMX2	5.553	6.78	5.5	5.7	1.22374	0.201838	1.0219
YFL018C	LPD1	10.304	9.47	9.5	9	-0.829741	-0.522281	-0.30746
YFL021W	GAT1	6.303	6.71	6.2	5.9	0.402447	-0.320894	0.72334
YFL022C	FRS2	10.724	10.35	9.3	9.5	-0.376388	0.22504	-0.60143
YFL023W	BUD27	7.797	8.32	8.1	8.2	0.518224	0.114753	0.40347
YFL024C	EPL1	5.859	5.76	6.1	7.3	-0.097282	1.18828	-1.28556
YFL025C	BST1	6.38	4.66	6.9	7.1	-1.71704	0.278225	-1.99526
YFL026W	STE2	10.818	10.78	10.9	10.6	-0.040604	-0.281968	0.24136
YFL027C	GYP8	5.652	6.52	7.6	7.7	0.872839	0.062548	0.81029
YFL028C	CAF16	7.678	7.87	8	7.6	0.194028	-0.363733	0.55776
YFL029C	CAK1	6.331	6.5	6.4	6.1	0.168285	-0.260344	0.42863
YFL030W	AGX1	3.848	3.89	5.6	5	0.046933	-0.590557	0.63749
YFL031W	HAC1	7.389	6.53	10	10.1	-0.860653	0.050112	-0.91076
YFL033C	RIM15	7.307	5.72	7.4	7.5	-1.59105	0.075148	-1.6662
YFL034C-A	RPL22B	7.721	8.85	8.8	9.6	1.13239	0.859754	0.27264
YFL034C-B	MOB2	7.358	7.64	6.9	6.7	0.278009	-0.204107	0.48212
YFL034W		6.541	4.76	6.7	7.4	-1.78566	0.6279	-2.41356
YFL036W	RPO41	8.444	7.19	8.1	8.1	-1.25288	0.01539	-1.26827
YFL037W	TUB2	10.729	10.99	9.7	9.8	0.263047	0.069933	0.19311
YFL038C	YPT1	10.318	10.93	9.8	9.4	0.608369	-0.391186	0.99955
YFL039C	ACT1	13.445	13.14	11.7	11.9	-0.302527	0.165177	-0.4677
YFL041W	FET5	8.65	8.25	7.9	7.6	-0.403515	-0.319041	-0.08447
YFL042C		6.162	5.12	6.3	6.6	-1.0419	0.298856	-1.34076
YFL044C	OTU1	6.78	7.33	6.3	6.4	0.551233	0.180892	0.37034
YFL045C	SEC53	11.013	9.53	10.5	10	-1.48406	-0.477431	-1.00663
YFL047W	RGD2	7.565	6.91	8	8	-0.656138	0.020408	-0.67655
YFL048C	EMP47	8.808	9.25	8.2	8.2	0.439969	-0.069653	0.50962
YFL049W	SWP82	6.704	7.05	7.2	7.2	0.34533	0.055501	0.28983
YFL050C	ALR2	1.564	2.76	6.1	7	1.1922	0.929889	0.26231
YFL054C		5.205	4.53	6.2	6	-0.677295	-0.25133	-0.42596
YFL055W	AGP3	3.349	3.01	5	5	-0.340604	-0.001769	-0.33883
YFL059W	SNZ3	5.92	3.91	6.8	4.7	-2.0067	-2.03301	0.02631
YFL062W	COS4	9.15	9.62	8.6	7.8	0.468451	-0.802321	1.27077
YFL066C		6.647	7.28	9.1	8.8	0.628376	-0.226058	0.85443
YFR001W	LOC1	7.343	8.01	7	7.4	0.664943	0.352188	0.31276
YFR002W	NIC96	9.069	9.33	8.5	8.7	0.265777	0.148244	0.11753
YFR003C	YPI1	6.81	7.53	6.5	6.4	0.718855	-0.100837	0.81969
YFR004W	RPN11	9.139	9.57	9.1	8.4	0.427846	-0.694618	1.12246
YFR005C	SAD1	5.839	6.05	6.7	7.1	0.207207	0.396257	-0.18905
YFR006W		8.618	7.89	8.4	7.9	-0.729029	-0.504402	-0.22463
YFR007W	YFH7	5.354	5.49	5.1	5.5	0.139458	0.337225	-0.19777
YFR008W	FAR7	5.606	5.9	5	4.7	0.293293	-0.228946	0.52224
YFR009W	GCN20	9.751	9.53	9.8	9.8	-0.222721	-0.034917	-0.1878
YFR010W	UBP6	9.102	9.16	8.6	8.5	0.055495	-0.136536	0.19203
YFR011C	AIM13	7.251	7.63	6.7	6.6	0.382894	-0.079422	0.46232
YFR013W	IOC3	7.69	7.6	8.1	7.8	-0.084814	-0.204939	0.12012
YFR014C	CMK1	7.651	7.74	7.5	7.3	0.087038	-0.178505	0.26554
YFR015C	GSY1	8.977	6.41	7.4	6.2	-2.56706	-1.15682	-1.41024
YFR016C		8.163	7.95	7.5	7.7	-0.215465	0.219959	-0.43542
YFR018C		7.297	5.09	7.5	7.6	-2.20731	0.100667	-2.30798
YFR019W	FAB1	7.116	7.51	6.8	7.2	0.392372	0.360057	0.03232
YFR021W	ATG18	6.843	5.97	6	6	-0.874426	0.057493	-0.93192
YFR022W	ROG3	6.5	5.93	6.5	6.7	-0.568022	0.186205	-0.75423
YFR024C-A	LSB3	8.865	9.14	8.5	8.2	0.27892	-0.282954	0.56187
YFR025C	HIS2	7.246	6.45	7.2	7.2	-0.79883	-0.028541	-0.77029
YFR027W	ECO1	4.527	5.22	4.8	4.8	0.689598	-0.043457	0.73306
YFR028C	CDC14	7.962	7.74	8.1	8.5	-0.218979	0.405773	-0.62475
YFR029W	PTR3	5.98	5.43	6	6.5	-0.550299	0.510804	-1.0611
YFR030W	MET10	7.117	5.96	6.9	7.5	-1.159	0.584337	-1.74334
YFR031C	SMC2	6.993	7.05	7.1	7.7	0.055707	0.607013	-0.55131
YFR031C-A	RPL2A	13.058	13.08	12.9	12.8	0.023331	-0.078957	0.10229
YFR033C	QCR6	7.891	8.05	7.4	7	0.156109	-0.391415	0.54752
YFR037C	RSC8	8.939	9.82	9.3	9.3	0.884796	-0.030979	0.91578
YFR038W	IRC5	7.115	6.58	7.7	7.6	-0.533694	-0.095722	-0.43797
YFR039C		6.562	6.29	7.5	7.7	-0.268028	0.135052	-0.40308
YFR040W	SAP155	7.28	5.32	7.5	7.7	-1.95532	0.260994	-2.21632
YFR041C	ERJ5	6.717	7.07	6.5	6.7	0.348243	0.15024	0.198
YFR042W	KEG1	5.991	6.17	5.5	5.8	0.178922	0.267674	-0.08875
YFR043C	IRC6	5.149	6.02	5.6	5.4	0.874538	-0.179352	1.05389
YFR044C	DUG1	10.436	11.08	8.4	8.6	0.642323	0.25622	0.3861
YFR045W		5.173	5.62	5.8	5.2	0.449789	-0.595809	1.0456
YFR046C	CNN1	4.57	4.63	5.3	5.8	0.063827	0.440503	-0.37668
YFR047C	BNA6	8.567	7.84	7.9	7.2	-0.72999	-0.756649	0.02666
YFR048W	RMD8	6.698	6.95	7.2	7.3	0.249054	0.027796	0.22126
YFR049W	YMR31	7.028	6.97	6.2	5.9	-0.05338	-0.318323	0.26494
YFR050C	PRE4	9.286	9.05	8.6	8.4	-0.236655	-0.227595	-0.00906
YFR051C	RET2	9.8	9.86	8.9	8.8	0.054931	-0.10419	0.15912
YFR052W	RPN12	8.814	9.33	8.3	8.1	0.516927	-0.206659	0.72359
YFR053C	HXK1	11.06	9.86	9	7.2	-1.19985	-1.88288	0.68303
YFR055W	IRC7	7.704	8.11	8.5	8	0.408286	-0.477485	0.88577
YGL001C	ERG26	8.192	8.78	8.3	7.9	0.585642	-0.454017	1.03966
YGL002W	ERP6	6.543	6.14	7.2	6.9	-0.402186	-0.383672	-0.01851
YGL003C	CDH1	6.012	5.83	7	6.9	-0.181309	-0.075571	-0.10574
YGL004C	RPN14	6.268	7.09	5.7	6.1	0.821128	0.36847	0.45266
YGL005C	COG7	6.43	6.74	6.5	6.5	0.306738	-0.073788	0.38053
YGL008C	PMA1	14.843	13.02	13.3	13.5	-1.82624	0.234946	-2.06119
YGL009C	LEU1	12.097	11.89	10.5	10.4	-0.211626	-0.066791	-0.14484
YGL010W		5.683	5.03	6.5	5.8	-0.652253	-0.78913	0.13688
YGL011C	SCL1	9.225	8.38	8.9	8.9	-0.841885	-0.025995	-0.81589
YGL012W	ERG4	10.263	10.66	9.6	9.7	0.393442	0.089956	0.30349
YGL013C	PDR1	7.406	6.68	7.6	7.8	-0.726732	0.16482	-0.89155
YGL014W	PUF4	8.681	7.51	8.4	8.4	-1.17271	-0.013111	-1.1596
YGL016W	KAP122	8.541	7.89	7.3	7.9	-0.651351	0.566058	-1.21741
YGL017W	ATE1	7.029	7.38	7.6	7.4	0.35191	-0.144693	0.4966
YGL019W	CKB1	8.343	8.42	8.1	8.2	0.077791	0.088319	-0.01053
YGL020C	GET1	7.96	8.47	7.6	7.7	0.508398	0.014635	0.49376
YGL021W	ALK1	7.28	7.02	7.9	7.9	-0.261555	0.000115	-0.26167
YGL023C	PIB2	7.224	6.95	7.2	7.4	-0.277602	0.219303	-0.4969
YGL025C	PGD1	7.068	6.58	6.9	6.7	-0.491664	-0.272274	-0.21939
YGL026C	TRP5	11.361	11.74	10.1	9.8	0.380738	-0.319176	0.69991
YGL027C	CWH41	9.25	7.62	8	7.9	-1.62901	-0.131139	-1.49787
YGL028C	SCW11	9.455	9.98	9.7	9.8	0.527285	0.085127	0.44216
YGL029W	CGR1	6.924	8.6	6.9	7.4	1.67706	0.473818	1.20324
YGL030W	RPL30	11.658	12.54	12.2	12.3	0.885744	0.114841	0.7709
YGL031C	RPL24A	11.903	12.55	11.3	11.6	0.643964	0.266417	0.37755
YGL032C	AGA2	7.286	7.71	7.1	6.2	0.420274	-0.832471	1.25274
YGL035C	MIG1	7.665	6	7.2	7.6	-1.66081	0.342259	-2.00307
YGL036W		7.056	5.87	7.1	7.3	-1.18882	0.1947	-1.38352
YGL037C	PNC1	10.579	10.3	10	8.5	-0.28022	-1.56435	1.28414
YGL038C	OCH1	8.351	7.16	7.7	7.1	-1.18569	-0.608712	-0.57697
YGL039W		6.775	4.72	6.5	6.3	-2.05371	-0.151347	-1.90236
YGL040C	HEM2	8.875	8.51	8.2	8	-0.361257	-0.16988	-0.19138
YGL041W-A		6.52	6.94	6.4	5.7	0.417068	-0.685352	1.10242
YGL043W	DST1	7.758	7.89	7.6	7.7	0.128987	0.077154	0.05183
YGL044C	RNA15	7.028	6.56	7.5	7.7	-0.468953	0.156468	-0.62542
YGL045W	RIM8	5.097	5.34	5.2	7.2	0.245714	2.02591	-1.78019
YGL047W	ALG13	6.064	5.07	5.9	6.4	-0.990834	0.519225	-1.51006
YGL048C	RPT6	9.459	9.71	9.9	9.2	0.254256	-0.659957	0.91421
YGL049C	TIF4632	8.761	7.58	7.5	7.6	-1.18202	0.124581	-1.3066
YGL050W	TYW3	6.44	6.03	6.1	6.8	-0.411624	0.690804	-1.10243
YGL051W	MST27	5.541	3.44	5.4	5.6	-2.09926	0.178927	-2.27819
YGL054C	ERV14	8.721	8.85	8.8	8.7	0.13329	-0.054757	0.18805
YGL055W	OLE1	12.728	12.17	12.3	11.6	-0.553802	-0.693439	0.13964
YGL056C	SDS23	8.756	9.18	8.7	8.8	0.427241	0.125325	0.30192
YGL057C	GEP7	6.503	6.68	6	5.9	0.175892	-0.098893	0.27478
YGL058W	RAD6	7.99	9.1	7.4	7.3	1.11028	-0.123364	1.23364
YGL059W	PKP2	6.24	5.7	6.6	6.2	-0.539604	-0.344612	-0.19499
YGL060W	YBP2	6.957	6.12	6.8	7.5	-0.836444	0.718645	-1.55509
YGL061C	DUO1	5.59	6.17	4.9	5.4	0.579063	0.496368	0.0827
YGL062W	PYC1	10.497	9.66	9.7	9.5	-0.838834	-0.149996	-0.68884
YGL063W	PUS2	3.147	5.11	5.8	6.1	1.96104	0.305673	1.65536
YGL064C	MRH4	6.631	7.4	6.4	6.6	0.766092	0.165815	0.60028
YGL065C	ALG2	7.334	7.85	6.7	6.8	0.517882	0.100512	0.41737
YGL066W	SGF73	6.937	6.33	6.8	7.2	-0.607467	0.417819	-1.02529
YGL067W	NPY1	7.23	5.28	6.7	7	-1.95165	0.338745	-2.29039
YGL068W	MNP1	8.234	8.65	8.7	8	0.413637	-0.620564	1.0342
YGL070C	RPB9	6.967	7.6	7.3	7.2	0.634434	-0.04002	0.67445
YGL071W	AFT1	6.014	4.36	7	6.8	-1.65068	-0.16622	-1.48446
YGL073W	HSF1	6.739	6.31	7.3	7.7	-0.432586	0.395839	-0.82842
YGL075C	MPS2	4.293	2.4	5.4	6.1	-1.89101	0.704668	-2.59568
YGL076C	RPL7A	13.555	14.14	11.7	12.2	0.585101	0.479572	0.10553
YGL077C	HNM1	10.197	8.88	10.4	9.7	-1.31228	-0.610828	-0.70145
YGL078C	DBP3	9.729	9.87	9.5	9.6	0.137555	0.077182	0.06037
YGL079W	KXD1	4.392	4.88	5.3	5.7	0.485512	0.397353	0.08816
YGL080W	FMP37	7.64	7.47	7.9	6.9	-0.173619	-1.0411	0.86748
YGL082W		7.991	7.59	7.7	7.7	-0.396959	0.026494	-0.42345
YGL083W	SCY1	6.386	4.38	5.7	6.2	-2.00795	0.553207	-2.56116
YGL084C	GUP1	8.111	6.85	7.9	7.5	-1.26171	-0.434472	-0.82724
YGL085W	LCL3	4.207	5.31	6.1	6.1	1.10633	0.066643	1.03969
YGL086W	MAD1	6.754	7.01	6.6	7.7	0.254707	1.03814	-0.78343
YGL087C	MMS2	7.036	7.56	6	5.9	0.524082	-0.105711	0.62979
YGL090W	LIF1	0.979	3.21	5.4	5.8	2.22833	0.399813	1.82852
YGL091C	NBP35	7.431	7.9	7.6	7.3	0.466138	-0.30291	0.76905
YGL092W	NUP145	9.084	8.64	8.8	9.1	-0.44869	0.28822	-0.73691
YGL093W	SPC105	6.438	6.58	6.8	7.2	0.145726	0.328919	-0.18319
YGL094C	PAN2	6.922	5.16	7.1	7.1	-1.75917	0.027564	-1.78673
YGL095C	VPS45	7.691	7.77	7.9	7.8	0.076543	-0.12854	0.20508
YGL096W	TOS8	4.408	5.19	4.1	5.3	0.781357	1.14875	-0.3674
YGL097W	SRM1	9.046	9.77	8.8	8.7	0.721889	-0.110153	0.83204
YGL098W	USE1	5.765	5.62	6.3	6.4	-0.146022	0.07713	-0.22315
YGL099W	LSG1	9.318	9.69	8.4	8.3	0.373041	-0.156488	0.52953
YGL100W	SEH1	8.235	8.57	7.9	8.2	0.33377	0.368067	-0.0343
YGL101W		7.098	7.56	6.4	6.5	0.465151	0.086524	0.37863
YGL103W	RPL28	12.837	13.56	13	12.8	0.71925	-0.17669	0.89594
YGL104C	VPS73	6.173	5.92	6.2	5.5	-0.249926	-0.717263	0.46734
YGL105W	ARC1	11.147	11.69	9.6	9.8	0.543342	0.190454	0.35289
YGL106W	MLC1	8.806	9.72	8.7	8.5	0.911201	-0.163419	1.07462
YGL107C	RMD9	7.965	7.8	7.7	7.6	-0.169704	-0.162747	-0.00696
YGL108C		4.29	5.66	4.9	5	1.37335	0.078269	1.29508
YGL110C	CUE3	7.296	8.03	7	7	0.731876	0.004924	0.72695
YGL111W	NSA1	8.311	8.27	8.1	8.4	-0.036388	0.289126	-0.32551
YGL112C	TAF6	8.013	7.84	8	8.2	-0.176632	0.196333	-0.37296
YGL113W	SLD3	4.905	4.37	7	6.6	-0.530835	-0.351083	-0.17975
YGL114W		7.606	7.08	8.4	8.2	-0.523738	-0.188365	-0.33537
YGL115W	SNF4	8.202	7.55	8.4	8.3	-0.647441	-0.154672	-0.49277
YGL116W	CDC20	7.39	6.83	7.7	7.8	-0.555957	0.114393	-0.67035
YGL117W		6.151	4.7	6	5.5	-1.44824	-0.464231	-0.98401
YGL119W	COQ8	7.135	7.4	7.5	7.2	0.261782	-0.256782	0.51856
YGL120C	PRP43	10.106	10.44	9.7	10.1	0.33495	0.347698	-0.01275
YGL122C	NAB2	10.227	10.34	9.4	9	0.111556	-0.40065	0.51221
YGL123W	RPS2	12.965	13.87	13.1	13.1	0.907774	-0.024633	0.93241
YGL124C	MON1	5.52	6.47	6.3	6.6	0.947007	0.310515	0.63649
YGL125W	MET13	9.107	7.81	7.4	5.7	-1.2951	-1.63992	0.34482
YGL126W	SCS3	7.81	8.27	8.5	8.3	0.456011	-0.211232	0.66724
YGL127C	SOH1	6.536	4.83	5.4	5.2	-1.70768	-0.190697	-1.51698
YGL129C	RSM23	7.612	5.95	7	7	-1.65712	-0.02532	-1.6318
YGL130W	CEG1	7.44	8.04	7.2	7.3	0.596986	0.103156	0.49383
YGL131C	SNT2	5.728	5.05	6.3	6.2	-0.678536	-0.035857	-0.64268
YGL133W	ITC1	6.698	6.14	6.5	7.3	-0.55788	0.8675	-1.42538
YGL134W	PCL10	3.984	3.71	6.1	6.1	-0.276211	-0.002822	-0.27339
YGL135W	RPL1B	13.285	14	13.1	13.2	0.710444	0.142702	0.56774
YGL136C	MRM2	4.157	3.72	5.6	6.2	-0.432939	0.556245	-0.98918
YGL137W	SEC27	10.622	10.85	9.6	9.6	0.232256	-0.017413	0.24967
YGL139W	FLC3	7.877	5.66	8	8	-2.21389	0.05109	-2.26498
YGL140C		7.952	6.87	8	8.4	-1.0861	0.397593	-1.48369
YGL141W	HUL5	7.762	8.08	7.3	7	0.32092	-0.244371	0.56529
YGL142C	GPI10	7.318	6.99	7.4	7.2	-0.325282	-0.289552	-0.03573
YGL143C	MRF1	4.995	5.57	6	6.2	0.579126	0.204119	0.37501
YGL144C	ROG1	6.074	4.4	7.1	7.1	-1.6696	-0.037807	-1.63179
YGL145W	TIP20	7.372	7.18	7.3	7.2	-0.192421	-0.077924	-0.1145
YGL147C	RPL9A	12.716	13.42	12.1	12.3	0.702881	0.18788	0.515
YGL148W	ARO2	10.59	10.93	10.5	10.2	0.343547	-0.345157	0.6887
YGL150C	INO80	8.403	7.77	8	8.5	-0.635133	0.491785	-1.12692
YGL151W	NUT1	7.753	6.88	7.6	8.1	-0.875896	0.448282	-1.32418
YGL153W	PEX14	6.803	7.25	6.6	6.3	0.451694	-0.234498	0.68619
YGL154C	LYS5	4.631	4.77	5.8	5.9	0.134367	0.098094	0.03627
YGL155W	CDC43	6.452	5.25	7.2	7.2	-1.20481	0.017617	-1.22243
YGL156W	AMS1	7.312	5.5	6.1	6.1	-1.81199	-0.026609	-1.78538
YGL157W	ARI1	9.496	9.74	9	8.3	0.249042	-0.706778	0.95582
YGL158W	RCK1	8.39	7.51	7.1	5.6	-0.88276	-1.52275	0.63999
YGL159W		6.782	6.91	6.9	6.2	0.12415	-0.672327	0.79648
YGL160W	AIM14	6.947	5.98	6.9	6.9	-0.96212	-0.006655	-0.95547
YGL161C	YIP5	7.785	7.88	7.8	8	0.09354	0.164554	-0.07101
YGL162W	SUT1	6.113	5.76	5.4	4.4	-0.349481	-1.01895	0.66947
YGL163C	RAD54	6.315	5.88	6.8	7.1	-0.431868	0.261599	-0.69347
YGL164C	YRB30	6.341	6.61	6.4	6.3	0.264355	-0.089456	0.35381
YGL166W	CUP2	6.426	6.82	6.8	6.8	0.395978	0.047209	0.34877
YGL167C	PMR1	9.304	6.53	9.1	9	-2.77513	-0.160408	-2.61472
YGL171W	ROK1	8.525	9.08	8.3	8	0.555328	-0.26026	0.81559
YGL172W	NUP49	8.629	7.86	9.1	8.4	-0.771379	-0.673688	-0.09769
YGL173C	KEM1	10.578	8.98	9.6	9.6	-1.60014	0.020266	-1.6204
YGL174W	BUD13	5.47	6	4.7	5.4	0.528424	0.623671	-0.09525
YGL176C		5.25	5.57	6.5	6.5	0.319582	-0.040065	0.35965
YGL178W	MPT5	8.242	6.98	7	7.3	-1.2585	0.270249	-1.52874
YGL179C	TOS3	6.163	5.78	7.1	6	-0.385398	-1.12627	0.74087
YGL181W	GTS1	7.226	7.17	7.5	7.2	-0.055243	-0.325237	0.26999
YGL186C	TPN1	9.086	8.27	8.8	7.8	-0.81588	-0.950629	0.13475
YGL187C	COX4	8.457	8.06	8.3	7.7	-0.402107	-0.560017	0.15791
YGL189C	RPS26A	12.245	13.04	10.4	11.3	0.797008	0.951077	-0.15407
YGL190C	CDC55	8.018	6.18	7.6	7.9	-1.83899	0.307073	-2.14607
YGL191W	COX13	8.747	8.99	8.4	7.8	0.247716	-0.637625	0.88534
YGL193C		-29.9	-0.23	5.2	5.1	29.6733	-0.063505	29.7368
YGL195W	GCN1	11.641	11.92	10.1	10.1	0.275593	0.018817	0.25678
YGL196W	DSD1	7.544	6.68	7.3	6.8	-0.867592	-0.511877	-0.35572
YGL197W	MDS3	7.334	6.33	7.1	7.4	-1.00858	0.245325	-1.25391
YGL198W	YIP4	7.76	8.44	7.6	8	0.676655	0.399571	0.27708
YGL200C	EMP24	9.589	8.98	9.4	8.8	-0.60937	-0.648174	0.0388
YGL201C	MCM6	7.719	7.77	7.5	7.8	0.052141	0.306761	-0.25462
YGL202W	ARO8	11.232	10.82	10.3	9.9	-0.410411	-0.328486	-0.08192
YGL203C	KEX1	8.691	8.02	7.9	8	-0.668009	0.147645	-0.81565
YGL206C	CHC1	11.562	11.25	9.4	9.5	-0.316022	0.077643	-0.39367
YGL207W	SPT16	9.849	8.34	9.3	9.2	-1.51203	-0.064034	-1.44799
YGL208W	SIP2	5.688	5.07	6	5.9	-0.621759	-0.124457	-0.4973
YGL209W	MIG2	8.374	8.95	7.6	7.6	0.57209	0.005095	0.567
YGL210W	YPT32	7.121	7.89	7.4	7.2	0.7656	-0.245231	1.01083
YGL211W	NCS6	6.965	7.39	8.5	8.2	0.42278	-0.345433	0.76821
YGL212W	VAM7	5.343	6.51	5.6	5.7	1.1703	0.17156	0.99874
YGL213C	SKI8	7.952	8.04	7.1	7.3	0.08783	0.148017	-0.06019
YGL215W	CLG1	8.396	5.63	8.7	9	-2.76998	0.335904	-3.10588
YGL216W	KIP3	6.767	5.43	6.6	6.7	-1.33994	0.116194	-1.45614
YGL219C	MDM34	7.341	7.13	6.8	6.7	-0.208594	-0.008904	-0.19969
YGL220W	FRA2	7.56	7.27	7.4	7.2	-0.286848	-0.162453	-0.12439
YGL221C	NIF3	8.496	9.02	8.4	8.4	0.526958	-0.007635	0.53459
YGL222C	EDC1	6.067	6.83	5.1	5.2	0.758482	0.164474	0.59401
YGL224C	SDT1	5.94	5.78	6.2	6	-0.156238	-0.212096	0.05586
YGL225W	VRG4	10.421	10.39	9.8	9.8	-0.034741	-0.034486	-0.00026
YGL226C-A	OST5	7.078	8.36	6.6	6.8	1.2832	0.258917	1.02428
YGL226W	MTC3	5.378	6.61	5.9	5.7	1.23555	-0.155642	1.39119
YGL227W	VID30	7.036	7.1	6	5.8	0.066384	-0.206924	0.27331
YGL228W	SHE10	8.996	8.9	8.6	8.4	-0.095249	-0.170279	0.07503
YGL231C	EMC4	8.053	8.32	7.9	7.4	0.26311	-0.502414	0.76552
YGL232W	TAN1	7.41	8.09	7.4	7.3	0.674944	-0.063652	0.7386
YGL233W	SEC15	7.213	6	7.9	7.8	-1.21337	-0.051663	-1.1617
YGL234W	ADE5,7	11.595	11.83	11.3	10.9	0.236714	-0.337794	0.57451
YGL236C	MTO1	6.789	6.74	7.6	6.8	-0.049418	-0.787692	0.73827
YGL237C	HAP2	6.852	4.64	6	5.6	-2.21015	-0.336869	-1.87328
YGL238W	CSE1	9.035	9.28	9.1	9.2	0.241722	0.175679	0.06604
YGL241W	KAP114	7.528	8.39	7.3	7.4	0.862654	0.130114	0.73254
YGL242C		7.097	7.45	6.4	6.4	0.35503	0.023205	0.33182
YGL243W	TAD1	4.814	4.81	6.7	7.1	-0.001878	0.415315	-0.41719
YGL244W	RTF1	8.415	8.24	8.4	8.6	-0.175586	0.197738	-0.37332
YGL245W	GUS1	12.273	13	10.8	11.1	0.72415	0.222647	0.5015
YGL246C	RAI1	7.793	8.15	8.4	8.2	0.352212	-0.173992	0.5262
YGL247W	BRR6	4.956	5.01	5.8	6.2	0.05648	0.426955	-0.37047
YGL248W	PDE1	6.505	5.48	6.4	6.4	-1.02983	-0.063498	-0.96633
YGL250W	RMR1	5	6.11	4.8	4.9	1.10694	0.07556	1.03138
YGL251C	HFM1	4.471	4.58	6.2	6.2	0.109032	-0.049088	0.15812
YGL252C	RTG2	7.819	7.52	8.4	8.4	-0.303311	0.061371	-0.36468
YGL253W	HXK2	11.965	12.61	10.7	10.5	0.64962	-0.204067	0.85369
YGL254W	FZF1	4.735	5.2	5.5	5.4	0.469466	-0.178946	0.64841
YGL255W	ZRT1	10.655	11.48	10	10.7	0.827918	0.669081	0.15884
YGL256W	ADH4	5.785	8.87	7.7	8.7	3.08686	0.960749	2.12611
YGL257C	MNT2	5.523	5.3	7.8	8.1	-0.227628	0.285004	-0.51263
YGR001C		7.991	8.84	7.5	7.4	0.84735	-0.175294	1.02264
YGR002C	SWC4	6.747	7.58	7.1	7.1	0.835552	-0.016242	0.85179
YGR003W	CUL3	6.489	7.57	7.1	7.2	1.07689	0.045016	1.03188
YGR004W	PEX31	6.325	6.42	6.6	6.4	0.097416	-0.209258	0.30667
YGR005C	TFG2	7.625	7.75	7.7	7.6	0.124718	-0.104789	0.22951
YGR006W	PRP18	4.883	3.99	5.2	5.4	-0.897606	0.24798	-1.14559
YGR007W	ECT1	7.109	7.67	7.9	8.1	0.563586	0.278588	0.285
YGR008C	STF2	8.449	7.94	7.4	6.4	-0.508684	-0.959009	0.45032
YGR009C	SEC9	8.235	8.46	8	8	0.220122	-0.010661	0.23078
YGR010W	NMA2	5.849	5.31	6.5	6.6	-0.538718	0.170062	-0.70878
YGR012W		7.385	7.78	7	7	0.397812	-0.011787	0.4096
YGR013W	SNU71	6.847	7.26	7.5	7.7	0.409713	0.180421	0.22929
YGR014W	MSB2	9.286	7.99	9.1	8.9	-1.29134	-0.220695	-1.07065
YGR015C		4.755	4.91	6	6.1	0.152575	0.111549	0.04103
YGR017W		6.672	5.67	7.2	7.2	-1.00326	0.087392	-1.09065
YGR019W	UGA1	8.787	8.02	7.5	7.2	-0.766275	-0.282314	-0.48396
YGR020C	VMA7	8.967	7.79	8.6	8.4	-1.17798	-0.196879	-0.9811
YGR021W		5.46	5.66	6	5.9	0.203081	-0.170706	0.37379
YGR024C	THG1	6.339	3.77	7.9	7.8	-2.56557	-0.105111	-2.46046
YGR026W		8.531	8.47	7.5	7.6	-0.062093	0.068214	-0.13031
YGR027C	RPS25A	11.981	13.07	11.3	11.9	1.09337	0.545361	0.54801
YGR028W	MSP1	6.811	7.03	6.6	6.9	0.219245	0.343199	-0.12395
YGR029W	ERV1	6.291	7.15	7	7.1	0.856438	0.052902	0.80354
YGR030C	POP6	6.784	7.5	6.1	6.3	0.714227	0.200957	0.51327
YGR031W		7.286	6.36	7.4	7.7	-0.930477	0.390336	-1.32081
YGR032W	GSC2	8.216	7.97	8.1	9.3	-0.24465	1.23298	-1.47763
YGR033C	TIM21	7.326	6.88	7.7	7.7	-0.448074	-0.033127	-0.41495
YGR034W	RPL26B	12.104	12.54	11.6	11.8	0.434456	0.206641	0.22781
YGR035C		6.331	7.16	5.7	6.3	0.828578	0.65703	0.17155
YGR036C	CAX4	6.989	7.35	7.9	7.9	0.361083	-0.060308	0.42139
YGR037C	ACB1	9.981	10.55	9.5	9.1	0.566913	-0.429491	0.9964
YGR038W	ORM1	6.718	7.64	6.5	7.4	0.922093	0.875372	0.04672
YGR040W	KSS1	6.887	6.87	7.5	7.4	-0.012686	-0.018624	0.00594
YGR041W	BUD9	5.097	5.22	6	7	0.119918	0.984808	-0.86489
YGR042W		4.655	4.53	6.2	6.1	-0.122356	-0.094076	-0.02828
YGR043C	NQM1	9.274	6.71	9.1	5.7	-2.56036	-3.48261	0.92225
YGR044C	RME1	7.759	7.32	7.1	7.3	-0.43506	0.172006	-0.60707
YGR046W	TAM41	6.981	4.59	7.3	7.1	-2.38566	-0.212288	-2.17338
YGR047C	TFC4	7.461	7.83	7.7	7.3	0.370725	-0.396368	0.76709
YGR048W	UFD1	7.919	8.12	8.7	7.8	0.198634	-0.895923	1.09456
YGR049W	SCM4	6.654	6.47	6.2	5.6	-0.185857	-0.583291	0.39743
YGR052W	FMP48	9.839	8.13	7.6	7.5	-1.70739	-0.186905	-1.52048
YGR054W		10.041	9.24	9	9.4	-0.80409	0.394248	-1.19834
YGR055W	MUP1	10.136	9.26	9.2	8.8	-0.877859	-0.347089	-0.53077
YGR056W	RSC1	7.524	7.3	7.5	7.6	-0.221438	0.183811	-0.40525
YGR057C	LST7	4.433	3.86	6.1	6.5	-0.57799	0.418272	-0.99626
YGR058W	PEF1	5.729	6.7	5.6	5.5	0.969798	-0.161022	1.13082
YGR060W	ERG25	10.449	10.81	9.4	9.8	0.361702	0.441173	-0.07947
YGR061C	ADE6	11.68	11.34	10.4	10.4	-0.338032	-0.078276	-0.25976
YGR062C	COX18	5.268	5	6.2	5.8	-0.267948	-0.439479	0.17153
YGR063C	SPT4	6.987	8.08	7.4	7.3	1.09504	-0.115893	1.21094
YGR065C	VHT1	7.996	7.14	8.2	7.1	-0.860002	-1.10455	0.24455
YGR068C	ART5	6.418	6.55	6.8	7	0.132754	0.169238	-0.03648
YGR070W	ROM1	4.459	4.69	6	5.8	0.231206	-0.154966	0.38617
YGR071C		5.634	5.42	6.8	7	-0.216722	0.158992	-0.37571
YGR072W	UPF3	6.169	6.46	6.7	6.8	0.289053	0.134151	0.1549
YGR074W	SMD1	6.518	7.44	6.4	6.9	0.924623	0.450611	0.47401
YGR075C	PRP38	4.819	5.11	4.6	5.2	0.294286	0.572253	-0.27797
YGR076C	MRPL25	5.884	5.77	5.1	5.1	-0.117772	0.046282	-0.16405
YGR078C	PAC10	8.432	9.12	7.1	7.4	0.688364	0.241702	0.44666
YGR079W		9.739	9.98	9.1	9.2	0.240644	0.11505	0.12559
YGR080W	TWF1	7.817	7.99	7.4	6.8	0.168465	-0.596685	0.76515
YGR081C	SLX9	7.479	8.1	7	7.6	0.619708	0.588758	0.03095
YGR082W	TOM20	8.833	8.93	8	7.6	0.099335	-0.372799	0.47213
YGR083C	GCD2	8.636	9.51	8.3	8.5	0.871978	0.184731	0.68725
YGR085C	RPL11B	12.669	13.07	11.6	11.8	0.40546	0.21407	0.19139
YGR086C	PIL1	11.688	11.97	10.3	10.2	0.281632	-0.075178	0.35681
YGR088W	CTT1	9.809	8.04	8.4	6.5	-1.77211	-1.88616	0.11404
YGR089W	NNF2	6.703	6.75	7.5	7.9	0.051265	0.329741	-0.27848
YGR090W	UTP22	9.675	7.9	9.2	9.6	-1.76968	0.402903	-2.17258
YGR091W	PRP31	6.099	6	6.4	6.3	-0.096608	-0.041765	-0.05484
YGR092W	DBF2	7.953	8.1	7.5	7.4	0.144503	-0.096088	0.24059
YGR093W		6.703	6.87	7.4	7.6	0.170472	0.182879	-0.01241
YGR094W	VAS1	11.934	11.89	11.3	11.1	-0.03903	-0.175661	0.13663
YGR095C	RRP46	7.813	8.23	7.7	7.6	0.417551	-0.083168	0.50072
YGR096W	TPC1	4.19	4.68	5.7	5.5	0.49328	-0.184955	0.67824
YGR097W	ASK10	8.807	7.99	8.3	8	-0.821178	-0.218785	-0.60239
YGR098C	ESP1	6.698	5.06	6.6	7.1	-1.64166	0.425211	-2.06687
YGR099W	TEL2	5.473	5.75	7.1	7.4	0.277798	0.326009	-0.04821
YGR100W	MDR1	7.772	7.14	7.9	8	-0.631284	0.051218	-0.6825
YGR101W	PCP1	7.062	7.23	7.4	7	0.167305	-0.330922	0.49823
YGR102C		5.98	4.05	6.1	6.2	-1.92597	0.051854	-1.97782
YGR103W	NOP7	10.323	11.31	10	10.3	0.987083	0.29653	0.69055
YGR104C	SRB5	5.635	5.49	6	6.4	-0.14036	0.42181	-0.56217
YGR105W	VMA21	7.189	7.6	7.4	7	0.407684	-0.318916	0.7266
YGR106C	VOA1	9.907	9.63	9.2	9.4	-0.273864	0.23129	-0.50515
YGR108W	CLB1	8.201	6.17	9	9.4	-2.0352	0.34472	-2.37992
YGR109C	CLB6	5.546	4.11	5.7	4.9	-1.43749	-0.756302	-0.68119
YGR111W		7.176	7.59	7.1	7.1	0.411877	0.038279	0.3736
YGR112W	SHY1	6.01	5.68	5.8	5.5	-0.326766	-0.282914	-0.04385
YGR113W	DAM1	5.841	6.76	6.9	6.9	0.916011	0.021975	0.89404
YGR116W	SPT6	10.015	9.95	9.1	9.3	-0.063735	0.147502	-0.21124
YGR117C		7.275	6.84	7	7.4	-0.438865	0.366027	-0.80489
YGR118W	RPS23A	12.258	13.18	12.4	12.5	0.922166	0.006543	0.91562
YGR119C	NUP57	8.507	7.56	9.2	9.2	-0.947566	-0.022718	-0.92485
YGR120C	COG2	6.186	6.55	6	6.1	0.362374	0.141853	0.22052
YGR121C	MEP1	5.483	5.11	5.5	5.8	-0.374567	0.246743	-0.62131
YGR122W		6.182	5.84	6.3	6.3	-0.342299	-0.008636	-0.33366
YGR123C	PPT1	9.101	8.83	8.1	8.3	-0.275966	0.25602	-0.53199
YGR124W	ASN2	11.782	12.21	11.2	10.8	0.426003	-0.314826	0.74083
YGR125W		7.908	7.6	7.2	7.6	-0.304442	0.38147	-0.68591
YGR127W		4.601	6.08	5.1	5.7	1.4745	0.635595	0.8389
YGR128C	UTP8	9.109	9.1	8.9	9.1	-0.006403	0.206262	-0.21266
YGR129W	SYF2	5.212	6.32	6.1	5.5	1.11164	-0.630079	1.74172
YGR130C		9.605	9.43	8.8	8.2	-0.169817	-0.531768	0.36195
YGR132C	PHB1	9.037	9.26	8.9	8.2	0.224575	-0.722163	0.94674
YGR133W	PEX4	5.916	5.99	4.9	5.4	0.072845	0.564002	-0.49116
YGR134W	CAF130	6.482	5.63	7	7.8	-0.848486	0.800795	-1.64928
YGR135W	PRE9	9.346	9.57	9.7	9.3	0.225251	-0.357114	0.58236
YGR136W	LSB1	8.454	8.98	7.7	7.5	0.525622	-0.217967	0.74359
YGR138C	TPO2	9.597	10.07	8.4	8.9	0.478079	0.451546	0.02653
YGR140W	CBF2	6.125	6.88	6.5	6.8	0.759943	0.276275	0.48367
YGR142W	BTN2	6.568	7.66	5.1	5.2	1.09097	0.133784	0.95719
YGR143W	SKN1	8.092	6.88	8	8.2	-1.21166	0.18141	-1.39307
YGR145W	ENP2	9.009	9.35	8.7	8.8	0.344769	0.177877	0.16689
YGR147C	NAT2	7.428	7.36	8.7	8.5	-0.0729	-0.166039	0.09314
YGR148C	RPL24B	11.667	12.18	10.6	11.1	0.517772	0.470127	0.04764
YGR149W		6.706	6.81	6.8	6.5	0.106958	-0.308647	0.41561
YGR150C	CCM1	6.31	6.31	7.3	7.2	0.004376	-0.141315	0.14569
YGR152C	RSR1	7.957	7.88	7.7	7.8	-0.07851	0.049101	-0.12761
YGR154C	GTO1	-0.037	1.41	5.4	6	1.44369	0.597308	0.84638
YGR155W	CYS4	11.916	12.23	11.3	11	0.311342	-0.299411	0.61075
YGR156W	PTI1	6.247	7.14	5.7	6.8	0.897212	1.17961	-0.2824
YGR157W	CHO2	10.386	8.8	9.2	9.2	-1.58858	-0.060145	-1.52844
YGR158C	MTR3	7.064	8.09	7.5	7.1	1.02451	-0.377691	1.4022
YGR159C	NSR1	12.001	11.65	11.9	12	-0.352124	0.058909	-0.41103
YGR161C	RTS3	7.921	8.08	7.6	6.9	0.154598	-0.631817	0.78641
YGR161W-C		5.637	5.57	4.8	4.8	-0.069871	-0.059642	-0.01023
YGR162W	TIF4631	11.041	11.41	10	10.3	0.36777	0.296035	0.07174
YGR163W	GTR2	6.926	6.72	6.5	6.7	-0.20103	0.16055	-0.36158
YGR165W	MRPS35	7.326	7.54	8.1	7.7	0.212519	-0.310224	0.52274
YGR166W	KRE11	6.316	5.75	6.7	6.9	-0.562973	0.241898	-0.80487
YGR167W	CLC1	8.663	7.63	8.2	7.9	-1.02839	-0.24622	-0.78217
YGR168C		3.681	5.17	6.3	6.3	1.49335	0.044167	1.44918
YGR169C	PUS6	5.299	5.83	5.8	5.8	0.533975	-0.000674	0.53465
YGR169C-A		6.646	7.83	6	6.4	1.18469	0.353201	0.83149
YGR170W	PSD2	6.371	5.65	7.6	7.8	-0.718862	0.271788	-0.99065
YGR171C	MSM1	5.838	5.83	5.8	5.9	-0.008304	0.127315	-0.13562
YGR172C	YIP1	8.055	8.74	7.8	7.7	0.67965	-0.062054	0.7417
YGR173W	RBG2	8.37	9.02	8.3	8.2	0.651035	-0.112083	0.76312
YGR174C	CBP4	6.781	4.84	6.3	5.9	-1.94262	-0.434866	-1.50775
YGR175C	ERG1	10.948	10.94	10.2	9.9	-0.011238	-0.299179	0.28794
YGR177C	ATF2	7.109	8.42	7.2	7.3	1.31519	0.14898	1.16621
YGR178C	PBP1	8.97	6.78	9	9.1	-2.19087	0.027402	-2.21828
YGR179C	OKP1	5.59	6.63	6.3	6.2	1.03701	-0.132355	1.16936
YGR180C	RNR4	11.052	11.56	10.3	10.2	0.510426	-0.017806	0.52823
YGR181W	TIM13	6.983	6.89	6.7	6.6	-0.093375	-0.181985	0.08861
YGR183C	QCR9	6.718	7.29	6.8	6.3	0.570489	-0.461761	1.03225
YGR185C	TYS1	10.574	11.16	9.5	9.5	0.587207	-0.000662	0.58787
YGR186W	TFG1	8.502	8.49	8.4	8.4	-0.011277	0.0215	-0.03278
YGR187C	HGH1	8.541	9.26	8.1	8.3	0.723322	0.194315	0.52901
YGR188C	BUB1	4.377	4.13	5.6	5.9	-0.24321	0.28903	-0.53224
YGR189C	CRH1	10.424	10.75	9.7	9.4	0.323828	-0.262223	0.58605
YGR191W	HIP1	9.709	8.89	9.5	9.5	-0.819533	0.048808	-0.86834
YGR192C	TDH3	16.746	17.53	15	15.1	0.784935	0.096496	0.68844
YGR193C	PDX1	8.303	7.69	7.5	7.5	-0.616551	-0.02644	-0.59011
YGR194C	XKS1	6.679	7.03	6	6	0.354119	0.013843	0.34028
YGR195W	SKI6	7.744	8.62	7.2	7.6	0.874518	0.328309	0.54621
YGR196C	FYV8	7.051	6.86	7.2	7.1	-0.188149	-0.085	-0.10315
YGR197C	SNG1	6.534	5.86	6.8	6.9	-0.676822	0.135163	-0.81199
YGR198W	YPP1	8.275	8.06	8.5	8.6	-0.219393	0.095594	-0.31499
YGR199W	PMT6	7.437	8.17	7.5	7.8	0.735979	0.317073	0.41891
YGR200C	ELP2	8.967	8.27	9.3	9.5	-0.697845	0.214539	-0.91238
YGR201C		4.863	4.11	5.3	5.6	-0.757132	0.244972	-1.0021
YGR202C	PCT1	8.137	8.1	8.2	7.6	-0.037827	-0.552897	0.51507
YGR203W	YCH1	5.947	7.33	4.9	6.2	1.38685	1.2653	0.12156
YGR204W	ADE3	11.619	10.95	10.4	10.2	-0.665296	-0.184157	-0.48114
YGR205W		6.434	6.73	5.8	6.1	0.297277	0.280814	0.01646
YGR206W	MVB12	5.105	5	4.8	4.9	-0.10157	0.062869	-0.16444
YGR207C		8.225	8.8	7.8	7.4	0.577183	-0.371748	0.94893
YGR208W	SER2	8.496	8.69	8.4	7.8	0.191595	-0.655558	0.84715
YGR209C	TRX2	10.357	11.01	10	9.7	0.655112	-0.361956	1.01707
YGR210C		7.967	5.8	8.6	8.6	-2.17073	-0.057586	-2.11315
YGR211W	ZPR1	9.91	10.65	9.5	9.4	0.742555	-0.116347	0.8589
YGR212W	SLI1	4.837	5.21	4.5	4.9	0.369134	0.364991	0.00414
YGR214W	RPS0A	12.648	12.26	11.9	11.6	-0.386749	-0.387247	0.0005
YGR215W	RSM27	6.31	5.74	6.1	6.5	-0.56606	0.381254	-0.94731
YGR216C	GPI1	5.812	6.03	7	7.3	0.212838	0.245864	-0.03303
YGR217W	CCH1	7.501	7.14	7.1	7.2	-0.356477	0.092542	-0.44902
YGR218W	CRM1	10.027	7.86	9.1	9.1	-2.16975	-0.006437	-2.16331
YGR220C	MRPL9	7.428	7.13	7.1	7.4	-0.294659	0.209471	-0.50413
YGR221C	TOS2	3.645	3.26	4.8	5.2	-0.384314	0.358649	-0.74296
YGR222W	PET54	5.392	6.16	6.7	6.6	0.762724	-0.03991	0.80263
YGR223C	HSV2	6.229	4.52	7.4	7.2	-1.70632	-0.159123	-1.54719
YGR227W	DIE2	7.651	7	7	6.8	-0.65274	-0.258381	-0.39436
YGR229C	SMI1	9.378	9.14	9.3	9.3	-0.236215	0.051328	-0.28754
YGR230W	BNS1	5.229	5.01	5.9	5.5	-0.214624	-0.452326	0.2377
YGR231C	PHB2	8.707	7.04	9.2	8.6	-1.66628	-0.627453	-1.03883
YGR232W	NAS6	7.898	7.95	6.9	6.9	0.047351	-0.062474	0.10983
YGR233C	PHO81	7.156	6.13	7.4	7.5	-1.02757	0.086736	-1.11431
YGR234W	YHB1	9.413	11.22	8.9	9.4	1.8046	0.529978	1.27462
YGR235C		8.154	8.28	8	7.6	0.121469	-0.435516	0.55699
YGR237C		7.394	6.98	6.6	6.9	-0.414139	0.287052	-0.70119
YGR238C	KEL2	4.742	5.37	6.2	6.6	0.623667	0.430983	0.19268
YGR239C	PEX21	6.374	7.05	6.4	6.7	0.67734	0.311359	0.36598
YGR240C	PFK1	12.364	11.44	10.7	10.9	-0.924183	0.193447	-1.11763
YGR241C	YAP1802	7.891	6.83	7.6	7.7	-1.06169	0.082552	-1.14424
YGR243W	FMP43	6.947	6.51	6.3	6.2	-0.431976	-0.172588	-0.25939
YGR244C	LSC2	9.372	7.43	8.9	7.5	-1.94603	-1.34861	-0.59742
YGR245C	SDA1	9.503	8.19	9.7	9.8	-1.31544	0.18056	-1.496
YGR246C	BRF1	7.443	6.63	7.5	7.6	-0.81062	0.100341	-0.91096
YGR247W	CPD1	6.066	5.75	6.5	7.1	-0.311647	0.565194	-0.87684
YGR248W	SOL4	7.159	6.36	5.9	4.4	-0.801455	-1.5011	0.69965
YGR250C		9.698	8.56	8.4	8.7	-1.14257	0.291477	-1.43405
YGR251W		6.334	6.67	6.3	6.4	0.335006	0.115709	0.2193
YGR252W	GCN5	6.417	5.21	6.4	7.5	-1.20573	1.06741	-2.27314
YGR253C	PUP2	9.603	9.83	9.7	9.3	0.223737	-0.401345	0.62508
YGR254W	ENO1	15.522	16.67	13.5	13.8	1.14666	0.249049	0.89762
YGR255C	COQ6	7.703	6.26	7.7	7.5	-1.44092	-0.169337	-1.27158
YGR257C	MTM1	5.457	4.9	7.6	7.3	-0.556789	-0.32201	-0.23478
YGR258C	RAD2	7.209	7.49	7.8	7.9	0.277703	0.095677	0.18203
YGR260W	TNA1	9.777	7.28	9.7	8.9	-2.49625	-0.858193	-1.63806
YGR261C	APL6	8.323	7.48	8.4	8.5	-0.842545	0.181896	-1.02444
YGR262C	BUD32	6.887	7.17	7.3	7	0.280995	-0.229607	0.5106
YGR263C	SAY1	5.842	6	6.3	5.9	0.156555	-0.401494	0.55805
YGR264C	MES1	11.082	11.79	10.3	10.5	0.704687	0.227462	0.47723
YGR266W		8.13	8.98	8	7.9	0.852307	-0.096011	0.94832
YGR267C	FOL2	8.11	6.88	9	8.4	-1.2292	-0.614825	-0.61438
YGR268C	HUA1	6.279	7.13	6	5.9	0.849445	-0.098042	0.94749
YGR270W	YTA7	8.031	6.18	8.1	8.6	-1.85022	0.529899	-2.38012
YGR271W	SLH1	8.056	8.62	7.5	7.7	0.559681	0.206136	0.35354
YGR274C	TAF1	7.44	5.6	7.6	7.8	-1.842	0.173243	-2.01524
YGR275W	RTT102	6.902	7.82	6.7	6.4	0.920162	-0.259712	1.17987
YGR276C	RNH70	7.896	7.99	8	7.8	0.09886	-0.143342	0.2422
YGR277C	CAB4	7.12	7.53	7.3	6.8	0.414165	-0.518661	0.93283
YGR278W	CWC22	6.269	6.91	6.5	6.3	0.637901	-0.230971	0.86887
YGR279C	SCW4	12.627	13.37	11.1	11.1	0.743249	0.024978	0.71827
YGR280C	PXR1	7.92	8.69	7.8	8.3	0.76939	0.54167	0.22772
YGR281W	YOR1	8.931	6.11	8.8	8.6	-2.81637	-0.170585	-2.64578
YGR282C	BGL2	11.967	13.08	11	11.1	1.11073	0.04975	1.06098
YGR283C		6.919	7.32	7.5	7.7	0.400489	0.215705	0.18478
YGR285C	ZUO1	11.929	12.9	11.1	10.7	0.973903	-0.358448	1.33235
YGR286C	BIO2	7.891	6.95	8.5	6.9	-0.939542	-1.56908	0.62954
YGR287C	IMA1	4.137	3.23	4.9	4.7	-0.905149	-0.211966	-0.69318
YGR288W	MAL13	4.237	4.97	5.4	4.9	0.73096	-0.436922	1.16788
YGR295C	COS6	9.206	9.69	8.7	7.7	0.483135	-0.985899	1.46903
YGR296W	YRF1-3	9.304	9.89	11.4	11	0.581016	-0.439668	1.02068
YHL001W	RPL14B	12.02	12.96	10.9	11.5	0.934843	0.695548	0.23929
YHL002W	HSE1	7.618	8.47	7.5	7.7	0.847499	0.261927	0.58557
YHL003C	LAG1	8.658	7.69	8.5	8.6	-0.964983	0.084781	-1.04976
YHL004W	MRP4	7.7	6.65	7.1	7.5	-1.04614	0.328253	-1.3744
YHL007C	STE20	8.452	7.45	8	8.4	-1.00509	0.408257	-1.41334
YHL008C		6.536	5.14	6.3	6.6	-1.39156	0.328383	-1.71994
YHL009C	YAP3	5.779	4.08	5.3	6	-1.70078	0.714438	-2.41522
YHL010C	ETP1	5.615	5.59	5.8	6	-0.030058	0.196594	-0.22665
YHL011C	PRS3	9.39	9.3	9.6	9.7	-0.090749	0.0956	-0.18635
YHL013C	OTU2	7.207	8.11	7.5	7.5	0.901162	-0.002524	0.90369
YHL014C	YLF2	5.749	5.52	5.9	6.3	-0.22948	0.327128	-0.55661
YHL015W	RPS20	11.636	12.46	11.2	11.8	0.823084	0.595664	0.22742
YHL016C	DUR3	5.724	6.57	6.1	6.6	0.84995	0.530347	0.3196
YHL019C	APM2	6.174	4.95	6.6	7.4	-1.22321	0.783096	-2.00631
YHL020C	OPI1	7.776	7.79	8.9	9.1	0.01672	0.166153	-0.14943
YHL021C	AIM17	9.458	9.14	6.9	5.6	-0.313519	-1.23201	0.91849
YHL023C	NPR3	6.539	5.82	7.1	6.8	-0.714945	-0.208642	-0.5063
YHL025W	SNF6	7.047	8.4	8.4	8.5	1.35456	0.062507	1.29205
YHL026C		5.553	5.26	6.5	6.6	-0.294798	0.075081	-0.36988
YHL027W	RIM101	8.461	7.45	8.7	9	-1.01141	0.337802	-1.34922
YHL028W	WSC4	3.847	4.64	5.9	5.6	0.788067	-0.354924	1.14299
YHL029C	OCA5	7.26	7.26	8	8.1	0.004785	0.121469	-0.11668
YHL030W	ECM29	9.173	9.38	8.1	7.5	0.208856	-0.580691	0.78955
YHL031C	GOS1	6.574	7	6.1	5.5	0.429155	-0.568463	0.99762
YHL033C	RPL8A	12.56	13.24	10.9	11.3	0.681257	0.327221	0.35404
YHL034C	SBP1	10.438	10.71	9.7	9.4	0.275436	-0.267028	0.54246
YHL035C	VMR1	4.303	3.74	5.8	6.3	-0.563181	0.520261	-1.08344
YHL038C	CBP2	6.366	5.99	6.5	6.5	-0.375363	0.026114	-0.40148
YHL039W	EFM1	7.729	7.72	8.4	8.5	-0.011417	0.075284	-0.0867
YHL040C	ARN1	4.633	4.43	6.5	7.3	-0.200626	0.795872	-0.9965
YHL047C	ARN2	3.161	3.5	7.2	7.2	0.341381	-0.015131	0.35651
YHL048W	COS8	7.824	7.44	7.4	6.1	-0.386326	-1.34511	0.95879
YHL049C		6.1	5.85	7.1	6.6	-0.252206	-0.463782	0.21158
YHL050C		7.812	8.54	10.6	10	0.731421	-0.561886	1.29331
[truncated: 2,919 more rows]

## Sheet: Ded1 dependent genes
#YORF	Gene	ΔTEded1-cs
YBL067C	UBP13	-4.43947
YOR360C	PDE2	-3.68031
YKR098C	UBP11	-3.57674
YNR051C	BRE5	-3.54768
YDR251W	PAM1	-3.52686
YHR086W	NAM8	-3.50505
YKR002W	PAP1	-3.46467
YOR195W	SLK19	-3.45564
YPL254W	HFI1	-3.38269
YIL090W	ICE2	-3.36786
YDL019C	OSH2	-3.34536
YOR228C		-3.32558
YKR100C	SKG1	-3.29356
YCR096C	HMRA2	-3.24207
YPR119W	CLB2	-3.15009
YGL215W	CLG1	-3.10588
YOR044W	IRC23	-3.10053
YER123W	YCK3	-3.06719
YJL155C	FBP26	-3.03413
YDR180W	SCC2	-3.02324
YDR371W	CTS2	-3.0038
YBL020W	RFT1	-2.9941
YMR212C	EFR3	-2.99137
YDL006W	PTC1	-2.97982
YOR109W	INP53	-2.96424
YJL101C	GSH1	-2.95141
YDR284C	DPP1	-2.91287
YOR256C	TRE2	-2.90057
YDR292C	SRP101	-2.8885
YKR017C		-2.86601
YDR266C		-2.84896
YHR082C	KSP1	-2.82987
YPR185W	ATG13	-2.82221
YJL130C	URA2	-2.81129
YKR058W	GLG1	-2.80858
YLR342W	FKS1	-2.79892
YNL090W	RHO2	-2.77799
YHR103W	SBE22	-2.77741
YOL087C		-2.77618
YLL048C	YBT1	-2.77432
YDR143C	SAN1	-2.77106
YKR095W	MLP1	-2.76718
YLR245C	CDD1	-2.73152
YLR392C	ART10	-2.73134
YLR083C	EMP70	-2.72407
YNL101W	AVT4	-2.72376
YMR126C	DLT1	-2.71097
YEL022W	GEA2	-2.70872
YPR124W	CTR1	-2.69791
YLR450W	HMG2	-2.67852
YML018C		-2.66886
YOR116C	RPO31	-2.6599
YBR211C	AME1	-2.65668
YML115C	VAN1	-2.6565
YDR217C	RAD9	-2.64652
YGR281W	YOR1	-2.64578
YMR102C		-2.642
YEL042W	GDA1	-2.63957
YLR071C	RGR1	-2.63359
YDR219C	MFB1	-2.63301
YOR370C	MRS6	-2.62127
YGL167C	PMR1	-2.61472
YLR190W	MMR1	-2.59698
YGL075C	MPS2	-2.59568
YJR110W	YMR1	-2.58285
YDL140C	RPO21	-2.58074
YOR086C	TCB1	-2.57935
YDR093W	DNF2	-2.56996
YLR047C	FRE8	-2.56443
YDR389W	SAC7	-2.56311
YGL083W	SCY1	-2.56116
YIR010W	DSN1	-2.55041
YIL149C	MLP2	-2.54778
YIL036W	CST6	-2.54515
YLR425W	TUS1	-2.54402
YJL071W	ARG2	-2.54365
YDL122W	UBP1	-2.53801
YJR013W	GPI14	-2.53287
YML126C	ERG13	-2.52423
YER088C	DOT6	-2.52181
YLR371W	ROM2	-2.52173
YLR403W	SFP1	-2.51235
YBR192W	RIM2	-2.50985
YNL287W	SEC21	-2.50782
YKR099W	BAS1	-2.50423
YPR097W		-2.4874
YKR051W		-2.47898
YOR355W	GDS1	-2.46834
YER111C	SWI4	-2.46721
YGR024C	THG1	-2.46046
YOR129C	AFI1	-2.45669
YDR407C	TRS120	-2.45663
YDR349C	YPS7	-2.45494
YKR031C	SPO14	-2.4547
YOR304W	ISW2	-2.45237
YDR200C	VPS64	-2.42739
YIL147C	SLN1	-2.42662
YJL128C	PBS2	-2.4217
YML035C	AMD1	-2.41732
YHL009C	YAP3	-2.41522
YFL034W		-2.41356
YHR206W	SKN7	-2.41134
YIL014W	MNT3	-2.40732
YDL142C	CRD1	-2.40314
YER125W	RSP5	-2.39946
YMR054W	STV1	-2.38541
YIL068C	SEC6	-2.38016
YGR270W	YTA7	-2.38012
YGR108W	CLB1	-2.37992
YIL088C	AVT7	-2.374
YOR008C	SLG1	-2.37186
YDR505C	PSP1	-2.3714
YPR070W	MED1	-2.36921
YMR037C	MSN2	-2.36796
YOR047C	STD1	-2.3585
YCR028C	FEN2	-2.35783
YPR159W	KRE6	-2.35333
YOR341W	RPA190	-2.35046
YDL123W	SNA4	-2.34685
YAL040C	CLN3	-2.34669
YDL180W		-2.33686
YDR169C	STB3	-2.33582
YBR059C	AKL1	-2.33326
YPL203W	TPK2	-2.33053
YDL224C	WHI4	-2.32881
YLR410W	VIP1	-2.32832
YPL122C	TFB2	-2.32505
YMR308C	PSE1	-2.32431
YCR008W	SAT4	-2.31727
YDR122W	KIN1	-2.30822
YFR018C		-2.30798
YBR168W	PEX32	-2.30226
YJL082W	IML2	-2.29628
YGL067W	NPY1	-2.29039
YMR010W		-2.28983
YML117W	NAB6	-2.28125
YGL051W	MST27	-2.27819
YGR252W	GCN5	-2.27314
YDR062W	LCB2	-2.27288
YOL045W	PSK2	-2.27204
YNL142W	MEP2	-2.27115
YLL013C	PUF3	-2.26837
YGL139W	FLC3	-2.26498
YMR058W	FET3	-2.26483
YPL116W	HOS3	-2.25716
YBR187W	GDT1	-2.25687
YNL085W	MKT1	-2.25034
YNL180C	RHO5	-2.25011
YKL105C		-2.24925
YOR107W	RGS2	-2.24672
YDR085C	AFR1	-2.24506
YDR170C	SEC7	-2.23944
YLR291C	GCD7	-2.23699
YMR262W		-2.23502
YOR043W	WHI2	-2.23429
YMR073C	IRC21	-2.23179
YER169W	RPH1	-2.23175
YER018C	SPC25	-2.23132
YPL125W	KAP120	-2.23065
YMR026C	PEX12	-2.22895
YMR089C	YTA12	-2.22415
YDR311W	TFB1	-2.22004
YGR178C	PBP1	-2.21828
YKL004W	AUR1	-2.21699
YFR040W	SAP155	-2.21632
YOL100W	PKH2	-2.21483
YLR443W	ECM7	-2.21346
YDR144C	MKC7	-2.20822
YMR163C	INP2	-2.2067
YOL004W	SIN3	-2.19905
YHR084W	STE12	-2.19717
YPL058C	PDR12	-2.19621
YPL023C	MET12	-2.19522
YDR254W	CHL4	-2.19286
YMR100W	MUB1	-2.18876
YJR121W	ATP2	-2.18427
YLR006C	SSK1	-2.18423
YOR326W	MYO2	-2.17738
YGR046W	TAM41	-2.17338
YGR090W	UTP22	-2.17258
YOR090C	PTC5	-2.17248
YJR106W	ECM27	-2.165
YMR013C	SEC59	-2.16464
YER149C	PEA2	-2.16414
YGR218W	CRM1	-2.16331
YKR072C	SIS2	-2.15735
YOL051W	GAL11	-2.15093
YDL058W	USO1	-2.15056
YGL190C	CDC55	-2.14607
YDR490C	PKH1	-2.14156
YER164W	CHD1	-2.13225
YAL009W	SPO7	-2.12392
YDL145C	COP1	-2.12086
YNL201C	PSY2	-2.11974
YKR028W	SAP190	-2.11622
YGR210C		-2.11315
YPL184C	MRN1	-2.11103
YPL016W	SWI1	-2.11103
YHR115C	DMA1	-2.10693
YBL066C	SEF1	-2.10575
YJL019W	MPS3	-2.10406
YMR165C	PAH1	-2.10267
YBL102W	SFT2	-2.09767
YKL046C	DCW1	-2.09391
YPL032C	SVL3	-2.09361
YBR023C	CHS3	-2.08976
YLR096W	KIN2	-2.0888
YBR212W	NGR1	-2.08829
YDR372C	VPS74	-2.08328
YAR014C	BUD14	-2.08279
YDL205C	HEM3	-2.08207
YNL126W	SPC98	-2.08114
YOR151C	RPB2	-2.07971
YBR283C	SSH1	-2.07863
YLR422W		-2.07723
YBL105C	PKC1	-2.07452
YMR277W	FCP1	-2.07383
YIL131C	FKH1	-2.07035
YGR098C	ESP1	-2.06687
YGL008C	PMA1	-2.06119
YAR033W	MST28	-2.05533
YLR188W	MDL1	-2.05334
YLL010C	PSR1	-2.05236
YNL298W	CLA4	-2.04918
YMR238W	DFG5	-2.04906
YMR139W	RIM11	-2.04763
YDR335W	MSN5	-2.04612
YLR130C	ZRT2	-2.04532
YBL017C	PEP1	-2.04369
YDR028C	REG1	-2.0417
YMR150C	IMP1	-2.03819
YOR329C	SCD5	-2.03811
YPR026W	ATH1	-2.03698
YPL006W	NCR1	-2.03165
YCL024W	KCC4	-2.02484
YLR228C	ECM22	-2.02081
YDR160W	SSY1	-2.01778
YMR216C	SKY1	-2.01685
YGR274C	TAF1	-2.01524
YDL089W	NUR1	-2.01011
YHL019C	APM2	-2.00631
YER017C	AFG3	-2.00564
YER114C	BOI2	-2.0034
YGL035C	MIG1	-2.00307
YHR131C		-1.99905
YFL025C	BST1	-1.99526
YDL203C	ACK1	-1.99421
YCL051W	LRE1	-1.99115
YOL136C	PFK27	-1.98353
YNL176C		-1.9801
YGR102C		-1.97782
YBR203W	COS111	-1.97714
YMR198W	CIK1	-1.97695
YIL022W	TIM44	-1.97303
YAL017W	PSK1	-1.96903
YJR138W	IML1	-1.96562
YDR434W	GPI17	-1.95514
YLR114C	AVL9	-1.95513
YDL190C	UFD2	-1.95446
YMR304W	UBP15	-1.95285
YLR206W	ENT2	-1.95106
YMR070W	MOT3	-1.94918
YBR057C	MUM2	-1.94394
YJL073W	JEM1	-1.94206
YOR291W	YPK9	-1.9348
YJL002C	OST1	-1.93459
YDR135C	YCF1	-1.93191
YBR084W	MIS1	-1.93077
YDL025C	RTK1	-1.93054
YEL013W	VAC8	-1.92742
YLR378C	SEC61	-1.92604
YOR118W	RTC5	-1.92502
YDR404C	RPB7	-1.92494
YKL072W	STB6	-1.92168
YOR270C	VPH1	-1.92016
YOL069W	NUF2	-1.91058
YLR353W	BUD8	-1.9061
YDR381W	YRA1	-1.90416
YGL039W		-1.90236
YPL008W	CHL1	-1.90001
YLR187W	SKG3	-1.89959
YOL075C		-1.89019
YML071C	COG8	-1.88983
YMR302C	YME2	-1.88945
YCL052C	PBN1	-1.88805
YPL137C	GIP3	-1.88378
YGL237C	HAP2	-1.87328
YLR023C	IZH3	-1.872
YHR155W	YSP1	-1.86662
YCR084C	TUP1	-1.86421
YLR131C	ACE2	-1.8638
YBR086C	IST2	-1.86304
YOR231W	MKK1	-1.86107
YDL235C	YPD1	-1.85857
YDR111C	ALT2	-1.85326
YHR098C	SFB3	-1.85165
YNL293W	MSB3	-1.84577
YDL189W	RBS1	-1.84563
YDR443C	SSN2	-1.84401
YLR019W	PSR2	-1.8409
YOR346W	REV1	-1.83423
YKL079W	SMY1	-1.83173
YKR010C	TOF2	-1.82619
YDR517W	GRH1	-1.81804
YBR038W	CHS2	-1.81651
YPL070W	MUK1	-1.81588
YPL221W	FLC1	-1.8153
YDL073W		-1.81484
YPL020C	ULP1	-1.81403
YJR068W	RFC2	-1.81372
YNL307C	MCK1	-1.81175
YDR497C	ITR1	-1.80818
YLR382C	NAM2	-1.80511
YOR113W	AZF1	-1.8021
YBR133C	HSL7	-1.80121
YMR273C	ZDS1	-1.79654
YOL089C	HAL9	-1.79652
YBL047C	EDE1	-1.7958
YLL038C	ENT4	-1.79429
YGL094C	PAN2	-1.78673
YIL005W	EPS1	-1.78662
YJL210W	PEX2	-1.78583
YGL156W	AMS1	-1.78538
YGL045W	RIM8	-1.78019
YJL140W	RPB4	-1.77837
YJL004C	SYS1	-1.77617
YDR440W	DOT1	-1.77137
YIL122W	POG1	-1.76764
YDR207C	UME6	-1.76749
YNL161W	CBK1	-1.76731
YOL098C		-1.76727
YOR070C	GYP1	-1.76698
YMR119W	ASI1	-1.76216
YPR174C		-1.76168
YIL048W	NEO1	-1.76067
YML006C	GIS4	-1.75897
YBR015C	MNN2	-1.75866
YMR237W	BCH1	-1.75843
YLR219W	MSC3	-1.75798
YPL244C	HUT1	-1.75294
YJR090C	GRR1	-1.74808
YFL008W	SMC1	-1.74724
YNL291C	MID1	-1.7449
YFR030W	MET10	-1.74334
YER166W	DNF1	-1.74144
YOR127W	RGA1	-1.73397
YNL167C	SKO1	-1.73011
YMR223W	UBP8	-1.72891
YLR067C	PET309	-1.72887
YPL145C	KES1	-1.72586
YBR151W	APD1	-1.72319
YDL171C	GLT1	-1.72317
YNL218W	MGS1	-1.72152
YER089C	PTC2	-1.72096
YHL008C		-1.71994
YDR159W	SAC3	-1.71895
YOR085W	OST3	-1.71881
YBR068C	BAP2	-1.71658
YDR146C	SWI5	-1.71577
YPL094C	SEC62	-1.715
YDR052C	DBF4	-1.7123
YPR008W	HAA1	-1.70797
YJL092W	SRS2	-1.70008
YOL036W		-1.69479
YNL076W	MKS1	-1.69207
YAL041W	CDC24	-1.69033
YDR310C	SUM1	-1.68988
YDL188C	PPH22	-1.68736
YHR154W	RTT107	-1.68568
YOR142W	LSC1	-1.68354
YBR125C	PTC4	-1.68313
YBL052C	SAS3	-1.68208
YPL115C	BEM3	-1.68059
YAL026C	DRS2	-1.68001
YER167W	BCK2	-1.6736
YBR146W	MRPS9	-1.67356
YCR027C	RHB1	-1.67295
YFL033C	RIM15	-1.6662
YLR028C	ADE16	-1.64985
YGR134W	CAF130	-1.64928
YNL154C	YCK2	-1.64762
YDR477W	SNF1	-1.64707
YDL013W	SLX5	-1.64643
YGR260W	TNA1	-1.63806
YNL005C	MRP7	-1.63251
YGL129C	RSM23	-1.6318
YGL144C	ROG1	-1.63179
YNL068C	FKH2	-1.62579
YPL063W	TIM50	-1.62449
YEL036C	ANP1	-1.62203
YGL173C	KEM1	-1.6204
YOR290C	SNF2	-1.61812
YDL240W	LRG1	-1.6152
YOR099W	KTR1	-1.61441
YPR138C	MEP3	-1.61377
YKL043W	PHD1	-1.61274
YDL141W	BPL1	-1.61147
YOR347C	PYK2	-1.61086
YLR427W	MAG2	-1.6064
YCL029C	BIK1	-1.60103
YDR216W	ADR1	-1.60087
YOR058C	ASE1	-1.59925
YOL013C	HRD1	-1.59788
YHR007C	ERG11	-1.59721
YDR060W	MAK21	-1.59678
YKL080W	VMA5	-1.59606
YDR347W	MRP1	-1.59596
YDR011W	SNQ2	-1.59592
YER165W	PAB1	-1.59519
YML061C	PIF1	-1.59351
YHR204W	MNL1	-1.59137
YJL061W	NUP82	-1.58103
YLR072W		-1.57968
YPR114W		-1.5756
YNL243W	SLA2	-1.57517
YER171W	RAD3	-1.57108
YNL088W	TOP2	-1.56925
YIL035C	CKA1	-1.56771
YJR046W	TAH11	-1.56566
YIR006C	PAN1	-1.56323
YNL199C	GCR2	-1.56308
YIL129C	TAO3	-1.56023
YNL137C	NAM9	-1.55886
YEL053C	MAK10	-1.55825
YGL060W	YBP2	-1.55509
YKL203C	TOR2	-1.54916
YGR223C	HSV2	-1.54719
YKL092C	BUD2	-1.54402
YCL014W	BUD3	-1.54173
YDL035C	GPR1	-1.54057
YNL295W		-1.53901
YOR175C	ALE1	-1.53601
YJL080C	SCP160	-1.53442
YLR073C	RFU1	-1.53439
YNL080C	EOS1	-1.53377
YGL178W	MPT5	-1.52874
YGR157W	CHO2	-1.52844
YMR171C	EAR1	-1.52834
YPR164W	MMS1	-1.52555
YAL016W	TPD3	-1.52428
YOR372C	NDD1	-1.52385
YGR052W	FMP48	-1.52048
YOR243C	PUS7	-1.51219
YJL110C	GZF3	-1.51164
YBL081W		-1.51
YAL019W	FUN30	-1.50654
YFL007W	BLM10	-1.50222
YBR275C	RIF1	-1.50205
YER016W	BIM1	-1.50088
YHR071W	PCL5	-1.49886
YGL027C	CWH41	-1.49787
YDR096W	GIS1	-1.49701
YGR245C	SDA1	-1.496
YMR047C	NUP116	-1.495
YER005W	YND1	-1.49474
YOR322C	LDB19	-1.49153
YOR316C	COT1	-1.48884
YLR223C	IFH1	-1.48861
YOR320C	GNT1	-1.4881
YNL127W	FAR11	-1.48793
YLR078C	BOS1	-1.48663
YML106W	URA5	-1.48415
YGL140C		-1.48369
YML056C	IMD4	-1.48322
YBR135W	CKS1	-1.48237
YNR030W	ALG12	-1.47977
YGR032W	GSC2	-1.47763
YOR014W	RTS1	-1.47632
YLR430W	SEN1	-1.4712
YER148W	SPT15	-1.46724
YFL009W	CDC4	-1.46402
YBR097W	VPS15	-1.45997
YDR422C	SIP1	-1.45909
YPL085W	SEC16	-1.45384
YKL191W	DPH2	-1.45159
YNL271C	BNI1	-1.4486
YHR119W	SET1	-1.44801
YGL207W	SPT16	-1.44799
YDR475C	JIP4	-1.44675
YDR214W	AHA1	-1.44658
YJL044C	GYP6	-1.44423
YBR172C	SMY2	-1.44389
YHR205W	SCH9	-1.44359
YKR079C	TRZ1	-1.44316
YOR267C	HRK1	-1.43999
YLR337C	VRP1	-1.43887
YDR033W	MRH1	-1.43722
YDL134C	PPH21	-1.43604
YPL050C	MNN9	-1.43506
YGR250C		-1.43405
YMR088C	VBA1	-1.43403
YBR140C	IRA1	-1.4275
YGL133W	ITC1	-1.42538
YOL103W	ITR2	-1.42416
YPR019W	MCM4	-1.42225
YJL029C	VPS53	-1.41638
YDR027C	VPS54	-1.41392
YHL007C	STE20	-1.41334
YKL101W	HSL1	-1.41251
YFR015C	GSY1	-1.41024
YBL051C	PIN4	-1.40833
YPR105C	COG4	-1.40776
YDR466W	PKH3	-1.40748
YLR310C	CDC25	-1.40414
YAL042W	ERV46	-1.40313
YKL015W	PUT3	-1.40138
YOR194C	TOA1	-1.40135
YAL056W	GPB2	-1.39574
YOR098C	NUP1	-1.39518
YGR143W	SKN1	-1.39307
YJL168C	SET2	-1.39271
YLR182W	SWI6	-1.38665
YLL019C	KNS1	-1.38575
YGL036W		-1.38352
YLR305C	STT4	-1.38039
YDR145W	TAF12	-1.38024
YKL182W	FAS1	-1.37607
YNL238W	KEX2	-1.37473
YHL004W	MRP4	-1.3744
YDR452W	PPN1	-1.37321
YKL185W	ASH1	-1.3712
YKR096W		-1.37002
YDR047W	HEM12	-1.36678
YBL099W	ATP1	-1.36598
YDL195W	SEC31	-1.36378
YER155C	BEM2	-1.36061
YBR001C	NTH2	-1.36003
YHR023W	MYO1	-1.35944
YMR044W	IOC4	-1.3544
YDR326C	YSP2	-1.35355
YNR039C	ZRG17	-1.35187
YLL021W	SPA2	-1.3497
YHL027W	RIM101	-1.34922
YDR206W	EBS1	-1.34839
YHR042W	NCP1	-1.34755
YPL247C		-1.343
YPL126W	NAN1	-1.3375
YPL204W	HRR25	-1.32989
YPR160W	GPH1	-1.32818
YJR059W	PTK2	-1.32459
YGL151W	NUT1	-1.32418
YPL265W	DIP5	-1.32338
YDL020C	RPN4	-1.32332
YLR332W	MID2	-1.32282
YGR031W		-1.32081
YPL036W	PMA2	-1.31673
YKL126W	YPK1	-1.31672
YLR347C	KAP95	-1.31156
YDL164C	CDC9	-1.31139
YMR016C	SOK2	-1.30959
YMR229C	RRP5	-1.30796
YGL049C	TIF4632	-1.3066
YAL022C	FUN26	-1.30534
YNR016C	ACC1	-1.30447
YNL284C	MRPL10	-1.30207
YCL037C	SRO9	-1.30046
YBR112C	CYC8	-1.29996
YCR017C	CWH43	-1.2958
YER075C	PTP3	-1.29412
YER107C	GLE2	-1.29298
YJR144W	MGM101	-1.28289
YBL030C	PET9	-1.28037
YJL062W	LAS21	-1.2792
YOR065W	CYT1	-1.27672
YJR096W		-1.27321
YML038C	YMD8	-1.27249
YGR255C	COQ6	-1.27158
YHR158C	KEL1	-1.26992
YFL036W	RPO41	-1.26827
YOR191W	ULS1	-1.26653
YJL076W	NET1	-1.26065
YKL068W	NUP100	-1.25683
YMR080C	NAM7	-1.24924
YPR024W	YME1	-1.24545
YLR348C	DIC1	-1.2424
YBL032W	HEK2	-1.23262
YNL229C	URE2	-1.23252
YMR241W	YHM2	-1.23102
YNR031C	SSK2	-1.23049
YLR454W	FMP27	-1.23037
YPR091C		-1.22982
YNL042W-B		-1.22969
YJL117W	PHO86	-1.22466
YBL054W	TOD6	-1.22272
YGL016W	KAP122	-1.21741
YDR333C		-1.21682
YBR218C	PYC2	-1.20835
YGR054W		-1.19834
YBL079W	NUP170	-1.18971
YBL004W	UTP20	-1.18292
YBR221C	PDB1	-1.18076
YDR232W	HEM1	-1.16894
YPL232W	SSO1	-1.1662
YDL185W	VMA1	-1.16607
YOR165W	SEY1	-1.16533
YCL045C	EMC1	-1.16318
YJL039C	NUP192	-1.16299
YGL014W	PUF4	-1.1596
YLR138W	NHA1	-1.15914
YNL256W	FOL1	-1.15586
YAL029C	MYO4	-1.15566
YNL280C	ERG24	-1.14296
YOR335C	ALA1	-1.14086
YJL020C	BBC1	-1.13621
YDL132W	CDC53	-1.13331
YIL125W	KGD1	-1.12903
YGL150C	INO80	-1.12692
YCR057C	PWP2	-1.12353
YJL098W	SAP185	-1.12345
YKL104C	GFA1	-1.12249
YGR240C	PFK1	-1.11763
YLR384C	IKI3	-1.11626
YOR273C	TPO4	-1.11543
YKL054C	DEF1	-1.08861
YGR014W	MSB2	-1.07065
YKL181W	PRS1	-1.03447
YFL045C	SEC53	-1.00663
YIL148W	RPL40A	1.00286
YNL339C	YRF1-6	1.01285
YGR209C	TRX2	1.01707
YHR183W	GND1	1.01795
YPL283C	YRF1-7	1.01998
YGR296W	YRF1-3	1.02068
YER006W	NUG1	1.0218
YER062C	HOR2	1.02262
YOR396W	YRF1-8	1.02267
YLR467W	YRF1-5	1.02478
YDR545W	YRF1-1	1.028
YEL040W	UTR2	1.03289
YLR301W		1.03485
YLL026W	HSP104	1.0355
YMR226C		1.03987
YLR420W	URA4	1.0454
YCL018W	LEU2	1.04992
YML133C		1.05107
YHR072W-A	NOP10	1.05278
YJL186W	MNN5	1.054
YOL143C	RIB4	1.05644
YDL125C	HNT1	1.05827
YLL066C		1.06067
YGR282C	BGL2	1.06098
YMR303C	ADH2	1.06791
YOR259C	RPT4	1.07157
YOR323C	PRO2	1.07345
YGL106W	MLC1	1.07462
YLR027C	AAT2	1.07843
YDR382W	RPP2B	1.08012
YKR094C	RPL40B	1.08073
YDR155C	CPR1	1.08323
YJR161C	COS5	1.08442
YDL007W	RPT2	1.09032
YOR204W	DED1	1.09369
YAR007C	RFA1	1.09847
YDR304C	CPR5	1.09986
YJR014W	TMA22	1.10096
YML052W	SUR7	1.10241
YPL127C	HHO1	1.10764
YOL005C	RPB11	1.11
YOL097C	WRS1	1.11603
YPL004C	LSP1	1.11699
YJL189W	RPL39	1.11956
YER177W	BMH1	1.1213
YPL111W	CAR1	1.12188
YFR004W	RPN11	1.12246
YKL145W	RPT1	1.1258
YER002W	NOP16	1.12842
YKL195W	MIA40	1.13162
YER150W	SPI1	1.13223
YNR046W	TRM112	1.13352
YDR529C	QCR7	1.1336
YDL133C-A	RPL41B	1.13781
YDL184C	RPL41A	1.14009
YDR429C	TIF35	1.1445
YLL067C		1.14548
YKL040C	NFU1	1.14609
YLR167W	RPS31	1.14624
YDR050C	TPI1	1.14692
YOL058W	ARG1	1.14784
YMR121C	RPL15B	1.15151
YMR311C	GLC8	1.15231
YFL016C	MDJ1	1.15909
YKR025W	RPC37	1.16023
YKL056C	TMA19	1.16198
YDR258C	HSP78	1.16208
YBR101C	FES1	1.16319
YKL096W-A	CWP2	1.16775
YIL177C		1.16989
YMR062C	ARG7	1.17026
YJL225C		1.1708
YDL178W	DLD2	1.17199
YMR214W	SCJ1	1.17658
YBR302C	COS2	1.18368
YML132W	COS3	1.18368
YPL215W	CBP3	1.18552
YDL248W	COS7	1.18602
YKL152C	GPM1	1.18826
YDR276C	PMP3	1.19628
YIL053W	RHR2	1.19982
YDR032C	PST2	1.20265
YGL029W	CGR1	1.20324
YOL109W	ZEO1	1.20631
YGR063C	SPT4	1.21094
YDR002W	YRB1	1.21178
YNL206C	RTT106	1.21342
YLR216C	CPR6	1.21516
YEL077C		1.2174
YMR002W	MIC17	1.23008
YDR041W	RSM10	1.23096
YGL058W	RAD6	1.23364
YLR194C		1.24024
YKR074W	AIM29	1.24348
YHR049W	FSH1	1.24489
YIL076W	SEC28	1.251
YGL032C	AGA2	1.25274
YJL151C	SNA3	1.25803
YOR298C-A	MBF1	1.2624
YEL001C	IRC22	1.26276
YBR173C	UMP1	1.26595
YBL028C		1.26619
YER183C	FAU1	1.26979
YFL062W	COS4	1.27077
YLR421C	RPN13	1.27459
YGR234W	YHB1	1.27462
YBR035C	PDX3	1.2748
YNL336W	COS1	1.27593
YNL070W	TOM7	1.27625
YNL079C	TPM1	1.27905
YOL086C	ADH1	1.28172
YGL037C	PNC1	1.28414
YDL213C	NOP6	1.28857
YHL025W	SNF6	1.29205
YHL050C		1.29331
YLR052W	IES3	1.29558
YMR276W	DSK2	1.29971
YNL007C	SIS1	1.30368
YOR045W	TOM6	1.31408
YPR052C	NHP6A	1.33012
YGR285C	ZUO1	1.33235
YCL035C	GRX1	1.3489
YFL010C	WWM1	1.35792
YJR025C	BNA1	1.36462
YJR086W	STE18	1.37105
YPR204W		1.37548
YDR524C-B		1.37578
YDR363W-A	SEM1	1.37818
YJL104W	PAM16	1.38024
YHR148W	IMP3	1.38215
YDL130W	RPP1B	1.38663
YIL138C	TPM2	1.38975
YOL093W	TRM10	1.39134
YGR158C	MTR3	1.4022
YBR053C		1.42333
YBR289W	SNF5	1.43328
YOL154W	ZPS1	1.44002
YLR292C	SEC72	1.44407
YOR006C	TSR3	1.44628
YKL160W	ELF1	1.44993
YNR034W-A		1.45334
YNL208W		1.46164
YMR285C	NGL2	1.46262
YJR104C	SOD1	1.46436
YGR295C	COS6	1.46903
YML092C	PRE8	1.47843
YLR262C-A	TMA7	1.47908
YCR020C-A	MAK31	1.47917
YPR170W-B		1.49077
YHR219W		1.49114
YBR231C	SWC5	1.50083
YER042W	MXR1	1.50179
YBR077C	SLM4	1.5071
YLR147C	SMD3	1.52794
YLR200W	YKE2	1.54008
YDR308C	SRB7	1.55577
YNL175C	NOP13	1.57504
YHR085W	IPI1	1.57683
YML094W	GIM5	1.58541
YDR296W	MHR1	1.60043
YDR415C		1.60959
YBR252W	DUT1	1.61008
YKL001C	MET14	1.61077
YPL213W	LEA1	1.61791
YCL058W-A	ADF1	1.63458
YER037W	PHM8	1.66285
YNL317W	PFS2	1.69302
YIL156W-B		1.71224
YBL033C	RIB1	1.71662
YHR055C	CUP1-2	1.72971
YHR053C	CUP1-1	1.72971
YFL014W	HSP12	1.73617
YGR129W	SYF2	1.74172
YHR087W	RTC3	1.75015
YJL011C	RPC17	1.76954
YER138W-A		1.78038
YBR005W	RCR1	1.79739
YDL039C	PRM7	1.80438
YPR166C	MRP2	1.80526
YKR004C	ECM9	1.81549
YLR288C	MEC3	1.87279
YDR423C	CAD1	1.87378
YGL256W	ADH4	2.12611
YDL037C	BSC1	2.12652
YOL013W-A		2.14908
YBL010C		2.16229
YDL139C	SCM3	2.17515
YIR016W		2.29999
YKR050W	TRK2	2.54688
YIR019C	MUC1	2.61756
YPR108W-A		2.74381
YBL075C	SSA3	3.50942
YOR009W	TIR4	3.79686
YCR014C	POL4	4.1422
YOL029C		4.27247
YJR155W	AAD10	4.65627
YDL239C	ADY3	32.7278

## Sheet: genome wide PARS dataset 
# YORF	Length	Total	Avg	First30	Start30	Max30Pos	Max30	Plus15	Plus30	Plus45	Plus60	Plus75
YAL003W	14	-9.3	-0.66	24.17	N/A	N/A	N/A	38.03	31.46	71.43	68.02	39.31
YAL005C	65	42.27	0.65	45.7	-2.85	-62	52.74	23.01	67.66	73.27	44.65	22.82
YAL007C	69	36.45	0.53	24.97	-16.64	-60	33.61	-11.08	2.62	7.81	36.21	67.09
YAL009W	27	-4.99	-0.18	-0.42	8.06	-20	10.28	3.19	0.47	18.42	15.6	0.82
YAL012W	67	79.7	1.19	53.8	6.47	-63	55.94	7.86	-11.57	19.45	45.14	15.72
YAL013W	34	9.72	0.29	9.72	6.34	-33	9.72	4.24	2.94	-4.51	2.96	6.88
YAL014C	45	32.9	0.73	18.01	9.19	-33	26.91	3.63	24.34	22.33	11.99	11.87
YAL021C	41	20.86	0.51	14.68	19.08	-18	28.11	24.76	35.11	22.47	8.43	16.9
YAL022C	35	-15.8	-0.45	-12.33	-4.66	-31	-10.05	17.05	10.14	-7.01	21.98	21.44
YAL023C	86	58.94	0.69	-3.1	28.29	-62	45.27	43.14	39.86	12.37	35.03	32.62
YAL025C	25	-11.81	-0.47	-11.16	-9.09	-21	-6.16	10.41	18.06	7.82	-2.31	5.63
YAL026C	88	0.01	0	-0.02	9.12	-32	9.54	6.24	-4.29	1.36	9.39	13.16
YAL029C	49	1.93	0.04	-11.45	14.45	-20	17.19	2.48	8.26	17.14	13.78	9.44
YAL030W	24	-15.96	-0.66	-12.58	3.21	-18	0.35	7.57	16.78	28.47	30.4	-10.36
YAL032C	36	4.88	0.14	4.88	1.95	-35	4.88	-2.38	4.96	8.22	-7.89	-2.31
YAL033W	18	1.07	0.06	0.14	0.14	N/A	N/A	-2.05	1.95	15.03	19.59	13.27
YAL035W	22	11.14	0.51	13.28	8.13	-21	13.28	17	25	4.05	-7.51	-1.42
YAL036C	21	-22.34	-1.06	-20.59	-16.56	-18	-19.68	15.01	11.77	-14.1	-11.96	18.86
YAL038W	30	-28.3	-0.94	-28.07	16.1	-18	7.23	24.56	52.44	40.91	43.24	82.45
YAL039C	51	9.5	0.19	8.91	3.42	-39	13.79	7.2	0.86	3.04	8.3	17.69
YAL040C	320	83.75	0.26	9.8	7.68	-195	20.38	31.07	44.34	24.4	-1.13	4.01
YAL041W	89	20.23	0.23	-1.93	15.26	-24	20.53	9.2	6.09	6.28	14.46	19.07
YAL043C	52	-2.98	-0.06	-5.75	20.03	-18	16.23	18.85	0.91	18.43	36.96	16.09
YAL044C	8	3.47	0.43	27.36	N/A	N/A	N/A	25.33	33.74	25.29	8.91	28.63
YAL046C	48	-2.25	-0.05	-2.79	-0.29	-18	2.64	13.78	-2.42	-15.9	-5.18	-14.77
YAL049C	50	-21.61	-0.43	-1.89	4.31	-48	-1.49	25.72	13.52	-4.09	-13.91	9.07
YAL053W	110	22.06	0.2	4.34	8.81	-78	16.03	26.88	18.43	5.7	9.74	7.52
YAL058W	51	3.53	0.07	-6.13	0.58	-25	9.66	2.39	9.76	5.08	-1.3	-1.97
YAL060W	87	-6.04	-0.07	3.21	11.16	-86	3.21	30.99	21.88	21.4	27.15	10.05
YAR002C-A	43	9.15	0.21	-0.42	30.84	-18	25.3	23.85	37.21	71.64	63.28	21.08
YAR002W	27	3.41	0.13	4.62	3.57	-24	7.69	2.29	2.98	11.11	20.97	15.06
YAR003W	30	21.86	0.73	23.53	19.99	-20	28.04	13.48	-5.08	0.25	20.39	13.16
YAR007C	66	8.73	0.13	-0.28	-2.49	-37	17.38	0.01	4.9	3.47	-0.37	7
YAR014C	152	-1.27	-0.01	-1.19	-5.83	-75	8.05	-2.98	14.06	19.09	-9.8	-4.86
YAR015W	35	8.12	0.23	9.48	4.7	-23	11.21	7.66	-12.52	-2.14	18.92	-10.78
YAR027W	10	-2	-0.2	-0.47	N/A	N/A	N/A	10.33	20.52	29.83	11.4	-3.53
YAR028W	49	-4.67	-0.1	-8.31	9.03	-19	9.73	15.8	21.87	15.17	-0.81	-14.26
YBL001C	69	-50.84	-0.74	-1.78	-28.7	-64	7.88	15.89	3.6	15.2	25.3	18.43
YBL002W	50	11.71	0.23	-6.85	50.12	-18	45.53	47.95	34.32	15.65	6.43	49.6
YBL003C	66	-23.87	-0.36	7.84	-11.04	-65	7.84	20.52	35.58	37.95	29.34	21.12
YBL006C	18	-10.14	-0.56	-10.41	-8.75	N/A	N/A	6.81	13.2	-0.98	2.86	28.58
YBL009W	35	-3.63	-0.1	-3.63	1.49	-30	3.33	2.82	10.25	13.45	3.45	5.15
YBL015W	79	-2.52	-0.03	-5.28	5.85	-25	8.73	-0.29	-7.37	-21.12	-20.08	-11.16
YBL016W	227	-1.6	-0.01	0	-4.82	-75	5.31	-1.83	-7.74	-4.14	11.04	13.72
YBL017C	185	16.45	0.09	3.17	13.7	-18	16.44	15.1	10.5	-5.1	-0.34	14.65
YBL018C	31	3.67	0.12	3.67	-5.47	-24	4.76	-0.84	16.17	19.94	0.66	3.28
YBL020W	159	14.63	0.09	5.1	-3.38	-60	11.58	3.01	17.15	16.16	9.25	11.58
YBL022C	114	9.35	0.08	3.05	-6.64	-65	13.03	1.77	2.67	6.31	11.96	15.71
YBL024W	113	-3.89	-0.03	4.28	-14.67	-47	10.33	0.72	2.89	4.32	4.79	6.26
YBL025W	126	4.99	0.04	-5.99	3	-39	12.56	-1.23	-12.77	2.48	17.56	3.2
YBL026W	66	45.26	0.69	13.38	33.68	-19	41.5	27.02	14.14	-2.92	-4.59	7.38
YBL027W	24	-9.19	-0.38	5.57	17.19	-18	11.57	12.92	-15.89	25.09	22.52	-3.7
YBL028C	34	10.31	0.3	7.81	13.95	-18	14.64	28.15	24.74	-6.56	-17.05	1.89
YBL030C	92	62.02	0.67	33.13	21.12	-74	40.66	23.92	22.18	28.61	-7.16	-5.23
YBL032W	76	89.22	1.17	61.27	-5.1	-70	67.97	19.57	8.46	-18.46	-10.95	7.91
YBL033C	30	1.44	0.05	2.51	5.25	-18	6.32	9.47	5.25	1.74	9.77	-0.34
YBL035C	188	3.21	0.02	-5.29	3.99	-73	8.2	6.01	9.22	-3.68	-9.06	-13.93
YBL036C	26	1.46	0.06	-0.62	-0.47	-20	2.83	-5.37	-22.13	-7.94	9.94	7.59
YBL038W	50	-15.65	-0.31	2.24	-3.73	-43	4.52	18.81	8.93	-1.33	-1.94	-0.72
YBL039C	56	8.1	0.14	8.52	-7.35	-44	10.21	9.47	35.61	28.1	25.7	53.6
YBL040C	24	39.3	1.64	44.35	30.84	-22	46.4	-15.19	-55.97	-0.37	34.44	9.91
YBL041W	43	-8.23	-0.19	7.66	-16.63	-40	11.33	10.59	4.98	7.37	12.22	24.83
YBL042C	49	4.61	0.09	13.43	-2.07	-42	14.83	5.7	2.14	1.72	7.4	-3.19
YBL045C	197	25.8	0.13	7.57	16.71	-65	30.94	13.21	-12.65	4.97	18.15	31.93
YBL047C	154	5.43	0.04	-2.47	4.63	-34	10.22	3.53	6.7	4.08	26.58	30.97
YBL050W	76	8.11	0.11	1.37	3.28	-45	14.86	4.49	-5.82	-2.33	3.72	7.9
YBL054W	102	13.03	0.13	8.33	34.98	-18	35.21	18.4	0.15	2.42	1.95	1.87
YBL055C	94	4.85	0.05	2.05	4.65	-24	8.42	6	8.19	8.96	7.95	20.13
YBL056W	82	12.25	0.15	2.05	-23.35	-48	21.3	-13.58	11.78	27.97	35.11	-11.82
YBL057C	7	0	0	-16.42	N/A	N/A	N/A	-17.66	-20.05	2.62	17.7	34.32
YBL058W	30	9.89	0.33	11.56	3.38	-29	11.56	0.94	11.39	-6.22	-19.79	-26.68
YBL059C-A	15	-13.74	-0.92	-10.15	N/A	N/A	N/A	-4.36	-6.74	-3.6	-0.54	-7.65
YBL061C	102	17.43	0.17	3.12	1.62	-70	15.24	7.07	-1.53	-7.91	2.64	11
YBL064C	34	0.09	0	-0.04	4.34	-22	4.99	-4.66	-12.17	-12.2	24.19	17.97
YBL068W	55	2.7	0.05	-6.26	3.77	-35	19.82	-1.63	-5.64	-1.66	21.6	11.46
YBL069W	58	7.4	0.13	4.63	7.38	-29	7.18	-8.83	1.5	-7.84	-5.76	-6.06
YBL071W-A	37	-29.14	-0.79	-31.11	-5.06	-25	-11.53	-22.75	-30.02	-5.51	-11.86	-4.38
YBL072C	316	-19.01	-0.06	2.83	-23.88	-211	15.49	1.69	16.4	26.07	27.81	50.09
YBL076C	16	-10.47	-0.65	35.33	35.33	N/A	N/A	66.23	29.75	9.63	4.01	37.12
YBL079W	28	-0.26	-0.01	-0.26	1.71	-24	2.21	6.83	17.76	9.85	0.68	4.92
YBL087C	21	-8.46	-0.4	-34.4	-36.7	-18	-34.31	-11.74	2.02	-6.76	-6.34	-3.66
YBL089W	47	-24.21	-0.52	-29.66	2	-23	7.12	5.94	5.63	11.58	20.05	20
YBL091C	34	-4.75	-0.14	2.88	15.89	-18	18.45	20.7	1.24	-2.81	1.24	7.23
YBL092W	335	-11.99	-0.04	-8.23	16.59	-279	22.58	11.69	-22.43	10.63	32.73	23.57
YBL093C	108	33.08	0.31	1.68	12.02	-50	25.31	-0.07	6.11	19.47	15.22	11.77
YBL098W	23	-2.15	-0.09	4.58	10.74	-18	9.25	12.32	-4.48	-0.74	-4.73	-3.07
YBL099W	299	108.72	0.36	-2.42	15.17	-72	53.88	25.94	24.65	10.87	14.39	19.16
YBL102W	91	28.82	0.32	6.86	16.43	-29	23.81	12.72	45.62	47.44	29.12	51.87
YBR002C	49	0.09	0	-0.93	1.27	-22	10.16	3.63	7.7	-6.37	-5.76	13.13
YBR003W	24	-2.18	-0.09	-2.35	1.74	-22	0.89	11.51	15.69	4.1	-2.84	-8.1
YBR004C	55	-0.43	-0.01	0	-5.41	-36	1.07	-2.24	6.02	5.42	-0.01	2.73
YBR005W	36	-2.76	-0.08	-2.9	-6.11	-29	0.96	-2.66	7.45	6.17	-4.26	-7.67
YBR009C	26	-4.54	-0.17	-1.66	-9.29	-24	1.65	-29.4	-29.11	-3.17	2.15	13.71
YBR010W	10	-7.35	-0.73	5.37	N/A	N/A	N/A	27.2	51.22	53.97	25.65	13.09
YBR011C	12	4.73	0.39	19.25	N/A	N/A	N/A	35.86	21.45	-6.11	-20.76	7.5
YBR014C	63	0.68	0.01	-2.69	-1.62	-42	6.97	-13.91	-16.07	4.84	8.19	20.23
YBR015C	108	38.68	0.36	0.76	0.87	-49	29.61	23.68	20.06	12.47	26.99	20.32
YBR016W	39	10.27	0.26	12.8	23.86	-18	27.56	34.61	23.92	5.11	21.88	46.9
YBR017C	50	9.75	0.2	9.13	4.16	-22	14.23	11.36	4.07	2.71	15.55	15.84
YBR022W	86	-4.1	-0.05	-3.79	11.23	-18	6.58	5.03	-5.37	1.04	14.17	-21.83
YBR023C	51	-20.3	-0.4	-6.55	-22.96	-50	-6.55	5.62	21.08	-16.97	-9.23	24.31
YBR025C	40	-2.74	-0.07	1.4	16.29	-23	14.38	30.42	55.86	66.45	23.83	19.7
YBR029C	686	-3.4	0	1.07	-16.88	-63	22.42	4.58	0.34	-1.99	12.15	1.49
YBR030W	65	-9.7	-0.15	-3.91	1.73	-21	6.86	2.54	6.06	17.26	22.39	3.72
YBR031W	170	37.18	0.22	33.26	-1	-161	57.55	48.48	52.57	31.5	17.65	13.48
YBR034C	20	4.05	0.2	7.29	10.65	-18	9.47	38.59	31.14	29.09	39.49	22.23
YBR035C	18	11.81	0.66	10.76	12.98	N/A	N/A	10.6	15.67	2.96	-3.95	-22.3
YBR036C	50	-4.41	-0.09	-9.46	25.95	-18	27.41	14.26	4.33	8.47	0.09	7
YBR037C	15	-25.28	-1.69	-35.56	N/A	N/A	N/A	-10.77	-1.31	9.97	5.2	6.38
YBR038W	94	16.29	0.17	2.74	14.89	-21	11.79	2.73	-3.08	-3.75	8.58	-2.79
YBR039W	93	24.64	0.26	-7.41	0.86	-52	33.31	-7.4	1.16	30.64	7.96	-11.76
YBR041W	49	3.11	0.06	-9	8.16	-18	9.13	-4.11	3.68	14.38	18.55	-3.05
YBR043C	152	-7.1	-0.05	2.21	44.34	-18	40.52	17.8	-4.08	1.98	9.13	24.07
YBR046C	59	1.38	0.02	-4.44	3.43	-23	11.63	7.66	9.35	6.69	-0.81	-3.78
YBR048W	29	-1.22	-0.04	6.11	4.58	-26	10.36	24.92	38.36	43.45	8.71	-4
YBR052C	46	-17.14	-0.37	-20.03	9.55	-18	-6.19	10.33	18.27	15.67	-7.49	-10.63
YBR053C	53	4.88	0.09	1.84	-9.23	-35	10.88	-7.39	1.43	6.19	20.3	5.96
YBR054W	316	3.54	0.01	4.87	-1.91	-304	23.4	-10.35	0.51	15.66	16.52	-2.28
YBR056W	43	13.99	0.33	-0.74	22.91	-19	25.48	10.58	3.17	1.44	-3.34	-1.71
YBR058C	23	5.47	0.24	7.78	13.49	-18	11.82	-7.72	-12.75	-0.6	0.75	1.13
YBR058C-A	46	-6.79	-0.15	-19.01	16.35	-20	17.6	3.07	17.27	35.71	39.7	31.86
YBR061C	56	-6.66	-0.12	0.14	4.45	-48	1.21	24.7	12.98	-0.49	-12.11	-3.47
YBR062C	9	0	0	-3.05	N/A	N/A	N/A	3.64	10.01	6.32	0.62	2.86
YBR067C	31	-1.79	-0.06	-1.79	0.94	-21	12.62	32.71	19.6	8.94	22.29	37.64
YBR068C	52	16.91	0.33	17.79	7.61	-50	20.27	15.02	3.34	11.84	18.95	2.73
YBR069C	102	-19.37	-0.19	-42.19	8.9	-45	33.03	9.67	33.07	36.16	-0.65	-13.51
YBR070C	66	-33	-0.5	1.27	-26.86	-52	6.17	4.46	15.23	5.98	-8.32	-0.74
YBR071W	60	7.54	0.13	-1.72	9	-40	9.55	17.82	22.05	18.93	-0.1	-7.78
YBR072W	61	-3.36	-0.06	3.16	-8.33	-54	9.76	1.37	14.21	6.29	-6.4	-4.03
YBR073W	76	2.52	0.03	-2.66	5.15	-37	11.91	11.49	9.42	7.61	7.78	14.5
YBR074W	6	-2.27	-0.38	-9.88	N/A	N/A	N/A	-7.61	-0.3	-2.04	-2.76	-14.85
YBR077C	123	-2.93	-0.02	2.14	2.09	-37	15.59	-14.24	-36.78	-38.66	-41.59	-2.57
YBR078W	164	109.07	0.67	9.68	22.17	-86	67.31	31.98	29.01	37.25	54.02	28.63
YBR079C	27	-10.82	-0.4	-7.65	26.54	-18	19.32	28.89	26.63	4	-5.58	9.63
YBR080C	22	-10.71	-0.49	-28.28	-19.82	-18	-23.59	-11.63	5.26	23.99	24.61	1.34
YBR082C	211	0.28	0	0	-3.62	-44	34.39	18.7	0.2	-10.6	14.56	46.59
YBR084C-A	132	-11.79	-0.09	1.07	7.88	-87	13.91	4.34	-21.27	20.73	36.44	24.54
YBR084W	71	4.66	0.07	6.73	0.69	-60	16.95	-4.03	7.1	31.71	2.48	-8.8
YBR085C-A	58	21.66	0.37	10.42	21.53	-18	22.46	-0.67	-32.54	-5.24	20.67	14.82
YBR085W	91	-5.71	-0.06	-0.13	-2.59	-51	4.38	-7.76	0.93	1.03	13.26	6.31
YBR086C	248	122.83	0.5	15.89	22.8	-90	36.4	17.22	10.71	10.35	9.42	0.14
YBR087W	14	3.33	0.24	13.53	N/A	N/A	N/A	9.8	8.35	5.11	0.31	4.84
YBR089C-A	440	9.7	0.02	8.66	-14.04	-65	14.99	-32.52	-31.78	-14.87	-4.78	5.96
YBR091C	28	-3.48	-0.12	-8.53	-8.49	-18	-7.56	-8.88	-9.64	-19.86	-17.51	-2.13
YBR092C	14	8.74	0.62	10.54	N/A	N/A	N/A	19.03	13.94	-5.21	16.34	38.96
YBR093C	49	3.01	0.06	11.03	3.36	-48	11.03	12.61	18.82	19.58	-0.94	8.24
YBR094W	57	-0.16	0	5.17	-4.95	-54	7.72	-2.41	-5.04	2.45	2.77	-2.82
YBR096W	85	43.1	0.51	3.36	-5.77	-53	49.27	13.78	6.61	-3.82	-3.43	7.13
YBR101C	39	4.81	0.12	0.03	-1.67	-30	3.74	-4.71	12.72	-4.79	-12.87	11.67
YBR104W	59	15.79	0.27	6.74	-4.06	-41	15.58	-6.71	-1.38	-0.39	4.56	-2.44
YBR106W	46	51.4	1.12	23.8	28.67	-37	47.98	21.83	-8.79	-12.08	46.86	59.13
YBR109C	30	0.13	0	0.73	0.85	-22	16.22	0.89	1.34	-0.36	-18.82	-1.02
YBR111C	34	-1.59	-0.05	-0.09	-0.61	-22	4.41	-5.66	5.95	19.17	8.24	-4.95
YBR111W-A	26	11.55	0.44	11.55	13.82	-24	12.15	4.39	8.21	15.52	12.03	-19.77
YBR115C	120	22.83	0.19	1.07	19.05	-32	23.54	6.99	-4.15	-2.24	16.22	13.42
YBR118W	15	-4.58	-0.31	-23.67	N/A	N/A	N/A	-6.14	25.19	7.02	25	-6.89
YBR121C	82	22.16	0.27	13.92	4.64	-45	19.95	43.88	39.49	1.52	-6.64	0.4
YBR122C	35	-2.51	-0.07	-4.88	13.21	-18	11.58	6.17	16.23	18.34	8.29	3.16
YBR125C	177	11.44	0.06	7.43	0.44	-76	13.72	16.75	33.46	17.93	0.85	4.92
YBR126C	60	27.04	0.45	23.1	7.48	-51	33.16	14.29	9.01	-4.13	0.92	41.3
YBR127C	47	11.14	0.24	9.62	13.17	-32	21.09	36.82	23.69	36.26	32.89	-20.74
YBR129C	37	14.36	0.39	10.07	16.07	-23	25.56	16.92	15.91	1.63	4.63	-13.07
YBR135W	86	37.99	0.44	-2.11	-9.35	-55	29.33	-1.22	7	-5.56	4.83	17.43
YBR137W	219	8.23	0.04	5.64	-1.94	-111	10.62	-28.18	-24.49	4.88	4.42	7.86
YBR139W	27	3	0.11	5.74	13.03	-18	13.03	10.99	10.33	1.61	0.95	3.14
YBR142W	44	12.92	0.29	9.75	-1.34	-30	12.78	-7.17	3.89	10.87	11.7	-3.44
YBR143C	22	10.53	0.48	7.19	3.95	-20	11.24	-0.43	16.99	24.84	5.91	-14.18
YBR145W	64	9.84	0.15	3.35	6.2	-21	10.13	3.89	2.49	-2.85	-4.06	2.05
YBR146W	63	19.09	0.3	-0.09	9.23	-32	21.61	1.08	7.75	32.18	20.79	-20.11
YBR149W	29	14.58	0.5	14.58	24.84	-19	21.84	22.4	2.96	-8.65	10.65	20.17
YBR151W	148	4.25	0.03	-7.8	12.47	-19	14.57	11.95	0.82	-2.86	7.94	22.58
YBR154C	112	18.17	0.16	2.14	20.46	-23	23.53	17.07	3.88	-8.71	-3.84	3.56
YBR158W	266	105.78	0.4	14.28	4.47	-73	36.13	5.99	13.63	31.79	28.64	19.63
YBR159W	141	-5.72	-0.04	0	-5.96	-90	1.55	-8.7	-4.96	2.38	1.23	-9.94
YBR160W	62	19.9	0.32	7.5	6.1	-33	14.07	-1.95	2.03	-1.32	-13.77	-8.19
YBR162C	149	82.23	0.55	23.85	7.78	-70	63.04	8.11	12.6	23.15	25.84	32.09
YBR162W-A	77	21.6	0.28	17.48	31.67	-19	19.79	46.06	15.98	-5.71	9.06	31
YBR164C	112	32.31	0.29	10.1	9.46	-54	14.37	22.02	-9.87	-23.04	11.19	11.49
YBR165W	75	-24.11	-0.32	-13.12	-12.56	-59	1.74	-22.49	-16.97	7.84	13.52	8.26
YBR166C	46	-1.44	-0.03	-0.51	1.14	-41	-0.51	10.15	10.36	9.29	-0.54	-3.28
YBR170C	52	4.99	0.1	7.72	2.75	-51	7.72	7.37	5.7	8.52	7.41	1.36
YBR171W	29	27.17	0.94	22.42	14.6	-25	22.87	-17.74	-10.04	9.16	8.88	2.13
YBR172C	98	32.84	0.34	6.94	16.04	-38	27.41	9.7	3.24	14.79	17.69	17.09
YBR173C	24	4.17	0.17	5	33.15	-18	24.41	23.06	12.83	19.61	23.45	21.1
YBR181C	29	-21.66	-0.75	-16.82	1.88	-18	-12.88	11.76	32.69	34.84	25.6	35.5
YBR183W	217	-16.04	-0.07	6.48	-15.42	-88	13.89	-1.84	-0.48	3.95	11.03	6.79
YBR185C	35	5.82	0.17	4.01	-2.12	-32	5.82	-4.95	2.38	9.85	9.26	5.23
YBR187W	115	66.24	0.58	7.03	-10.46	-46	49.06	-15.59	21.34	38.78	25.2	22.24
YBR188C	65	9.75	0.15	6.21	-2.51	-49	15.87	3.62	-0.48	11.67	11.79	11.66
YBR189W	24	-10.76	-0.45	-10.78	-4.44	-18	-8.58	-14.28	-27.48	-20.3	20.2	29.35
YBR193C	39	-6.22	-0.16	-7.29	2.36	-20	-0.01	5.43	-2.02	0.36	2.24	10.96
YBR196C	44	-21.79	-0.5	-35.25	10.9	-18	0.49	25.83	24.38	46.26	48.38	-36.28
YBR199W	75	13.08	0.17	2.39	3.34	-55	31.75	3	8.76	14.6	27.67	23.73
YBR200W	54	-24.02	-0.44	1.54	-24.44	-51	2.91	2.18	1.99	-11.84	-10.65	6.06
YBR202W	77	-1.95	-0.03	-1.55	-3.41	-50	8.09	8.69	9.55	5.01	4.47	18.99
YBR207W	34	6.78	0.2	1.39	14.7	-23	16.37	1.62	-3.75	-6.29	-2.79	16.48
YBR210W	28	25.31	0.9	25.45	9.41	-23	26.02	-15.02	-12.39	9.83	16.1	6.73
YBR211C	100	16.04	0.16	0.28	-2.36	-64	16.47	-4.94	-2.64	-5.34	-7.33	1.35
YBR212W	351	20.07	0.06	1.4	1.49	-62	7.78	7.02	10.3	6.59	7.72	13.2
YBR214W	85	27.25	0.32	18.2	16.7	-82	19.13	11.84	13.63	11.52	8.83	-2.89
YBR218C	142	14.84	0.1	10.36	2.74	-141	10.36	-17.18	-15.52	9.53	7.88	1.56
YBR220C	69	10.61	0.15	-0.73	4.73	-44	17.08	-0.59	-10.37	-6.46	8.66	30
YBR221C	204	229.22	1.12	61.67	31.52	-25	67.42	13.57	37.45	51.04	41.08	24.57
YBR222C	128	30.03	0.23	-0.65	29.53	-22	32.05	29.13	-13.1	-37.06	-8.44	14.33
YBR229C	18	-0.89	-0.05	-2.69	-1.62	N/A	N/A	-0.78	5.16	10.7	13.75	4.08
YBR230C	15	4.79	0.32	9.98	N/A	N/A	N/A	-2.65	2.85	17.05	-1.4	6.93
YBR230W-A	49	-20.73	-0.42	0	-17.79	-48	0	1.59	4.59	-24.76	-27.42	1.42
YBR231C	59	-7.07	-0.12	-4.59	0.45	-18	-0.48	0.14	0	-0.93	0.14	1.35
YBR233W-A	40	4.21	0.11	2.52	-3.38	-34	4.7	13.05	21.89	10.83	1.18	8.85
YBR234C	48	-1.63	-0.03	0.64	7.36	-19	12.2	16.06	11.34	11.61	32.71	33.28
YBR235W	65	-6.35	-0.1	-0.79	0	-64	-0.79	0.14	1.17	3.73	10.01	7.59
YBR236C	41	-6.7	-0.16	-9.91	9.51	-25	5.75	28.48	26.27	-1.09	-2.98	3.95
YBR241C	65	-11.37	-0.17	-1.95	-3.89	-24	4.55	6.01	16.27	3.75	-1.24	9.33
YBR242W	166	-10.3	-0.06	3.25	9.37	-47	14.27	-5.47	-1.79	21.31	8.05	-4.88
YBR244W	39	9.58	0.25	5.71	7.49	-23	8.69	9.05	11.93	0.65	9.84	22.96
YBR246W	38	23.23	0.61	18.78	2.21	-32	22.44	-2.49	6.22	8.41	22.02	8.78
YBR247C	5	-3.76	-0.75	3.17	N/A	N/A	N/A	7.45	10.74	7.05	0.28	1.07
YBR248C	83	2.95	0.04	-4.51	15.96	-49	14.08	9.66	-1.44	9.89	-28.95	-13.58
YBR249C	138	-18.88	-0.14	-14.64	18.58	-68	18.74	51.21	53.23	30.19	1.38	-6.48
YBR251W	41	-4.1	-0.1	-4.24	5.44	-22	6.33	7.86	3.46	5.64	5.75	4.68
YBR252W	15	-9.9	-0.66	17.78	N/A	N/A	N/A	31.49	6.24	22.55	29.03	32.48
YBR253W	48	-36.47	-0.76	-29.88	2.18	-18	0.51	20.91	15.97	8	4.31	9.37
YBR254C	7	-4.06	-0.58	14.76	N/A	N/A	N/A	27.53	13.94	11.54	18.33	10.15
YBR256C	22	3.54	0.16	10.02	12.97	-19	10.75	7.07	-31.08	-36.33	-4.39	4.21
YBR260C	20	0.08	0	5.7	9.37	-18	7.7	8.36	10.43	-9.19	-14.83	10.06
YBR261C	28	-66.02	-2.36	-66.13	-38.1	-18	-48.73	26.78	20.55	12.61	-13.96	-19.99
YBR262C	31	12.21	0.39	12.21	-19.89	-29	14.31	-32.3	-0.49	4.19	-11.2	-4.53
YBR264C	127	2.79	0.02	0	1.98	-47	3.35	7.33	10.47	4.88	-2.91	2.4
YBR265W	56	-9.36	-0.17	-9.23	-10.74	-28	-3.56	-10.68	-5.33	3.94	18.42	-10.74
YBR267W	7	-11.87	-1.7	-5.12	N/A	N/A	N/A	8.93	26.84	25.42	7.65	-9.06
YBR268W	8	0.34	0.04	2.52	N/A	N/A	N/A	5.95	9.89	-15.18	-13.4	7.97
YBR269C	5	-1.36	-0.27	-7.51	N/A	N/A	N/A	-15.86	-19.15	7.8	6.67	21.19
YBR273C	34	7.57	0.22	9.9	3.94	-33	9.9	-3.49	-5.4	-1.43	5.79	7.89
YBR274W	46	1.79	0.04	-1.08	10.14	-20	8.14	11.08	9.25	4.65	-1.89	-2.32
YBR276C	76	-1.97	-0.03	3.26	-36.68	-51	20.56	-10.04	17.52	17.59	19.51	7.74
YBR283C	149	57.94	0.39	2.74	29.51	-106	41.2	22.15	26.89	40.31	15.9	24.85
YBR286W	34	-3.28	-0.1	-14.68	19.29	-19	28.3	17.74	40.01	30.67	60.41	53.25
YBR287W	38	17.93	0.47	8.65	12.62	-30	20.01	2.46	5.31	14.87	20.96	5.38
YBR288C	30	18.85	0.63	18.85	17.07	-24	21.45	9.09	-2.83	-6.41	8.76	16.88
YBR291C	170	4.92	0.03	0	-1.28	-66	6.83	-10.38	-7.89	1.01	0.77	2.42
YBR293W	490	-2.61	-0.01	1.17	0.14	-45	3.48	1.21	3.21	3.35	2.42	0.81
YCL001W	59	-4.99	-0.08	12.23	-16.48	-58	12.23	13	-2.17	-9.57	3.54	2.65
YCL002C	27	-13.85	-0.51	-18.58	-23.1	-25	-17.84	-3.01	4.75	9.37	7	-12.48
YCL005W	44	9.15	0.21	1.74	11.74	-30	10.94	23.09	13.01	8.91	15.64	11.77
YCL008C	8	-8.39	-1.05	-9.72	N/A	N/A	N/A	2.35	15.87	12.52	-13.14	-21.12
YCL009C	12	5.36	0.45	23.66	N/A	N/A	N/A	39.03	23.37	12.41	40.82	55.2
YCL010C	12	0.38	0.03	9.06	N/A	N/A	N/A	12.46	-7.39	-2.13	7.17	-0.38
YCL011C	47	10.36	0.22	8.75	-44.93	-36	11.41	-34.36	18.24	13.68	10.21	31.71
YCL012C	66	0.95	0.01	4.88	-5.58	-64	5.95	0.34	7.21	6.09	0.14	6.41
YCL016C	34	4.52	0.13	3.45	2.58	-31	4.38	6.71	4.41	0.03	-4.75	-12.73
YCL017C	97	-30.15	-0.31	6.96	-0.01	-96	6.96	-1.45	14.47	25.87	26.54	25.71
YCL025C	184	-13.7	-0.07	0.31	10.17	-32	14.52	7.66	3.89	8.74	24.84	16.24
YCL027W	10	-3.12	-0.31	4.52	N/A	N/A	N/A	12.48	9.39	7.68	10.5	5.21
YCL028W	24	13.68	0.57	22.53	25.92	-19	30.71	6.41	-5.88	3.47	12.56	21.84
YCL031C	34	19.58	0.58	15.77	12.7	-24	21.73	15.5	4.98	-0.19	6.7	6.4
YCL033C	26	-0.43	-0.02	-1.79	-2.67	-25	-1.79	0.47	7.67	4.85	-7.2	-18.93
YCL034W	32	1.22	0.04	1.22	-2.7	-29	4.39	8.56	25.33	19.18	7.91	-5.41
YCL035C	45	21.95	0.49	21.08	18.86	-19	30.32	37.2	25.8	-3.51	-8.43	0.21
YCL037C	59	39.66	0.67	28.91	11.05	-58	28.91	6.61	11.12	15.06	21.36	20.45
YCL040W	32	37.53	1.17	35.43	36.01	-30	36.37	22.5	1.98	13.24	45.54	54.44
YCL043C	40	41.71	1.04	51.4	12.11	-39	51.4	21.86	28.27	26.45	-0.4	23.57
YCL044C	28	16.99	0.61	18.66	6.39	-27	18.66	6.29	16.27	12.44	9.23	16.39
YCL045C	43	21.04	0.49	12.22	20.57	-36	26.02	-8.63	-3.83	40.5	39.76	23.23
YCL047C	11	1.07	0.1	8.94	N/A	N/A	N/A	12.85	7.67	2.38	8.72	8.89
YCL049C	140	-2.83	-0.02	0	-3.21	-57	2.37	-4.59	1.95	10.26	0.46	-8.82
YCL050C	64	15.28	0.24	12.76	23.65	-18	14.59	32.85	25.7	33.21	19.19	14.64
YCL052C	34	4.4	0.13	5.33	9.15	-20	10.23	3.72	1.79	5.9	7.63	5.35
YCL055W	131	-1.62	-0.01	0	-1.88	-66	1.07	2.8	5.46	11.24	10.88	2.21
YCL057C-A	19	-3.44	-0.18	4.3	6.08	-18	4.3	-19.23	-19.44	22.94	40.35	36.94
YCL057W	18	4.92	0.27	11.8	17.73	N/A	N/A	11.61	5.2	6.7	13.68	22.42
YCL059C	35	6.62	0.19	4.19	7.29	-18	8.49	11.39	4.65	3.89	-1.88	-12.04
YCL064C	36	10.71	0.3	3.72	12.13	-21	13.62	9.32	6.77	22.05	18.74	-0.93
YCR002C	34	8.27	0.24	12.18	-4.36	-33	12.18	9.66	-3.14	4.26	-2.52	-8.87
YCR004C	172	0.74	0	10.75	-11.34	-64	14.37	20.25	23.82	19.2	-1.05	19.53
YCR005C	47	5.8	0.12	5.71	0.74	-46	5.71	-4.04	-2.09	-2.45	3.17	10.41
YCR008W	140	26.61	0.19	9.32	12.14	-123	17.54	20.69	11.56	4.17	14.64	9.6
YCR009C	50	-12.7	-0.25	8.13	-19.88	-48	8.84	1.21	28.27	18.22	18.07	23.25
YCR011C	137	16.17	0.12	3.34	-2.2	-21	12.55	6.88	14.94	24.2	48.13	34.36
YCR012W	43	14.8	0.34	17.05	14.53	-41	18.75	46.35	50.57	32.24	45.58	61.45
YCR017C	32	24.24	0.76	24.07	29.13	-21	30.46	13.16	5.85	7.76	21.99	21.53
YCR020C-A	9	2.62	0.29	8.1	N/A	N/A	N/A	1.77	-2.56	0.61	7.51	-0.66
YCR023C	77	44.49	0.58	16.68	-15.56	-65	43.81	4.21	12.02	5.32	2.34	4.19
YCR026C	64	8.69	0.14	3.76	7.22	-22	9.36	18.04	1.89	-16.3	0.45	0.59
YCR027C	200	22.74	0.11	-16.97	-6.52	-45	21.49	7.73	33.37	20.61	6.96	6.62
YCR028C	90	49.58	0.55	16.77	46.94	-22	46.01	14.18	-6.93	-8.38	11.15	2.02
YCR028C-A	60	-14.87	-0.25	28.93	-3.6	-59	28.93	44.38	48.3	21.95	29.86	49.29
YCR030C	51	-5.76	-0.11	4.86	-12.43	-44	7.82	-5.05	-5.1	8.59	22.49	20.91
YCR031C	23	-7.98	-0.35	-1.4	33.48	-18	26.76	36.72	40.24	23.16	48.72	50.2
YCR034W	28	11.37	0.41	15.78	24.81	-18	25.97	21.4	14.8	13.97	11.65	31.92
YCR036W	37	6.55	0.18	5.89	6.35	-22	12.24	8.12	-2.36	-1.8	11.73	8.6
YCR043C	44	10.16	0.23	-5.19	23.42	-18	18.56	11.28	-12.42	-15.41	-5.05	7.64
YCR044C	40	2.33	0.06	0.85	10.84	-18	12.34	9.12	14.22	24.66	16.58	7.29
YCR046C	18	5.13	0.29	4.71	3.48	N/A	N/A	-0.8	-5.96	-2.83	-1.45	0.92
YCR047C	90	0.18	0	-3.72	-7.17	-43	11.53	-3.3	1.42	13.51	12.62	22.05
YCR051W	7	-5.42	-0.77	10.86	N/A	N/A	N/A	35.31	27.76	-4.21	0.72	5.38
YCR052W	21	0.13	0.01	6.26	13.77	-20	6.26	3	-1.66	12.56	18.17	12.16
YCR057C	128	31.87	0.25	-4.31	4.08	-47	29.82	2.26	14.52	19.73	7.05	7.65
YCR059C	16	-30.4	-1.9	-1.8	-1.8	N/A	N/A	-6.55	-14.3	32.59	25.54	25.17
YCR060W	16	0.61	0.04	-1.27	-1.27	N/A	N/A	0.99	3.29	8.14	-5.63	-9.25
YCR061W	59	1.35	0.02	0.14	7.11	-18	6.18	4.42	10.49	18.44	25.42	22.97
YCR065W	89	12.17	0.14	4.88	13.79	-19	20.49	16.18	12.01	-2.73	1.23	17.64
YCR067C	120	3.6	0.03	4.47	-0.13	-77	15.05	12.27	8.02	-1.29	-2.35	0.58
YCR069W	211	88.74	0.42	2.45	-0.19	-50	47.34	-5.47	23.72	15.68	9.48	7.46
YCR072C	54	4.58	0.08	-4.62	6.03	-23	10.41	1.74	-3.05	-5.32	1.48	-17.01
YCR073W-A	16	11.47	0.72	11.52	11.52	N/A	N/A	10.82	11.13	10.59	3.95	9.4
YCR075W-A	18	-1.75	-0.1	-6.48	-8.91	N/A	N/A	-7.61	5.35	8.31	-9.33	-7.27
YCR076C	31	1.07	0.03	1.07	-5.08	-24	2.55	-4.33	8.27	6.96	0.38	-2.1
YCR077C	44	6.84	0.16	13.14	5.22	-35	15.13	9.02	3.64	0.08	-2.86	18.15
YCR082W	36	32.28	0.9	24.29	20.99	-19	47.36	36.12	-0.24	-9.47	20.7	26.03
YCR083W	25	-5.88	-0.24	-2.54	10	-18	4.61	26.47	3.43	-18.92	2.14	15.2
YCR084C	203	78.47	0.39	18.32	19	-198	28.5	8	5.8	18.3	15.04	4.17
YCR088W	45	10.45	0.23	2.93	13.96	-23	17.71	14.37	20.5	12.3	-3.41	-0.93
YCR090C	25	-4.14	-0.17	-2.33	6.69	-18	5.87	-25.2	-35.23	13.79	36.56	10.28
YCR094W	63	3.01	0.05	6.31	-0.51	-62	6.31	6.22	3.94	1.65	9.2	9.9
YDL004W	44	-9.73	-0.22	-6.48	11.11	-18	8.37	11.69	9.56	17.93	-0.37	-4.32
YDL006W	334	-14.96	-0.04	-1.3	4.05	-218	11.8	-0.11	0.68	6.98	3.21	1.07
YDL007W	37	-1.34	-0.04	-4.08	15.07	-21	16.14	18.35	-1.7	-17.84	-8.77	3.02
YDL008W	13	-1.79	-0.14	-20.35	N/A	N/A	N/A	-14.99	3.18	9.13	3.75	-4.23
YDL012C	10	0.36	0.04	-3.56	N/A	N/A	N/A	-5.09	0.34	24.22	19.61	17.25
YDL014W	129	8.77	0.07	12.84	-5.25	-116	17.92	13.19	17.12	2.15	1.45	-23.59
YDL015C	42	4.99	0.12	6.87	20.72	-18	23.38	30.16	27.11	-3.81	-29.57	-8.93
YDL018C	62	11.85	0.19	8.18	-3.21	-47	19.13	3.91	4.18	6.05	5.52	-13.29
YDL019C	215	23.8	0.11	3.77	-2.42	-63	11.65	-8.66	-3.77	-2.09	-1.58	-4.63
YDL020C	246	6.9	0.03	-1.05	3.64	-181	11.61	0.56	-6.82	8.64	8.56	6.76
YDL022W	89	-25.51	-0.29	-10.13	-14.5	-67	8.01	-19.44	-35.37	3.45	29.38	39.37
YDL029W	9	-19.1	-2.12	9.12	N/A	N/A	N/A	44.7	24.8	8.96	26.59	32.23
YDL040C	29	20.11	0.69	22.85	5.93	-26	23.28	0.46	15.71	3.54	0.15	3.37
YDL045C	139	24.5	0.18	2.28	1.33	-22	16.4	2.23	-1.3	-3.65	9.03	15.31
YDL045W-A	34	0.18	0.01	1.68	3.04	-33	1.68	14.36	32.68	34.96	25.16	2.92
YDL046W	67	34.05	0.51	28.38	14.39	-66	28.38	7.49	13.68	36.37	39.29	-8.69
YDL047W	195	12.56	0.06	3.08	-4.8	-186	10.72	10.9	1.72	13.63	35.77	21.6
YDL051W	31	1.71	0.06	1.71	12.25	-20	12.11	7.49	-14.43	-33.99	-19.73	18.74
YDL052C	36	1.19	0.03	5.35	-5.45	-35	5.35	6.74	14.67	10.77	0.02	-6.2
YDL053C	171	33.86	0.2	-1.72	19.22	-18	21.87	24.76	26.85	18.83	13.97	-6.93
YDL054C	56	7.38	0.13	1.63	6.21	-27	8.03	4.29	-1.33	-6.37	-0.2	7.75
YDL055C	151	165.44	1.1	20.99	-5.49	-55	95.17	50.04	66.9	54.44	60.32	59
YDL060W	43	14.06	0.33	5.78	17.1	-18	17.7	12.95	0.55	-2.92	-0.72	-0.94
YDL061C	446	79.35	0.18	2.29	3.34	-252	19.12	-17.96	-29.57	-18.49	36.62	53.52
YDL063C	104	35.7	0.34	13.06	10.92	-20	19.53	5.08	11.47	15.98	12.31	-3.72
YDL064W	32	8.08	0.25	9.1	6.08	-21	10.17	12.4	9.52	-5.5	-5.63	-9.61
YDL066W	21	-0.68	-0.03	6.38	16.6	-19	7.14	11.56	23.31	35.87	35.31	31.76
YDL067C	49	22.27	0.45	-5.67	50.49	-18	42.79	-10.6	-39.62	5.45	10.12	11.37
YDL072C	45	37.45	0.83	34.82	-14.3	-44	34.82	-0.91	18.65	2.47	23.59	23.67
YDL075W	22	-18.54	-0.84	-9.85	-7.95	-21	-9.85	-15.94	6.71	6.19	-2.46	18.9
YDL076C	121	18.13	0.15	5.48	9.79	-18	11.79	7.84	7.06	8.13	0.65	-1.63
YDL078C	55	15.82	0.29	9.94	27.61	-18	25.79	22.68	-1.48	12.77	31.68	27.5
YDL081C	48	-29.77	-0.62	0.29	-0.24	-47	0.29	29.91	17.25	-4.85	-12.94	41.8
YDL082W	27	4.9	0.18	-0.07	14.36	-18	16.32	12.04	-6.77	-6.49	-12.45	-11.5
YDL083C	21	-21.57	-1.03	-9.44	-13.82	-20	-9.44	7.53	18.5	33.37	39.13	34.93
YDL084W	157	65.92	0.42	19.1	10.06	-123	25.94	19.29	31.66	18.18	2.35	22.29
YDL085C-A	62	-0.28	0	-2.21	-4.23	-37	5.44	11.3	14.52	15.49	26.45	-2.06
YDL086W	29	1.69	0.06	0.19	-8.1	-25	4.19	-2.12	7.29	2.34	8.2	8.04
YDL088C	157	7.04	0.04	-0.65	12.1	-20	14.37	10.76	8.59	19.77	27.9	39.17
YDL090C	7	0.14	0.02	5.92	N/A	N/A	N/A	5.88	-6.58	-7.13	-10.44	-3.65
YDL092W	10	0.12	0.01	2.26	N/A	N/A	N/A	11.48	16.11	15.92	2.71	-3.35
YDL095W	82	63.08	0.77	18.72	20.13	-25	57.92	-13.26	-5.22	4.84	25.61	14.36
YDL097C	43	-15.31	-0.36	-13.12	-4.51	-19	-4.37	11.68	12.11	8.66	9.72	31.62
YDL100C	26	-3.39	-0.13	-6.35	0.81	-23	-5.67	-2.66	19.22	23.14	-3.37	4.06
YDL103C	58	-20.7	-0.36	-10.8	1.43	-19	2.88	14.9	18.65	8.79	8.84	8.75
YDL108W	50	6.09	0.12	0	1.06	-32	6.09	-2.02	4.08	2.74	1.16	6.85
YDL110C	60	-2.69	-0.04	-1.41	6.46	-18	8.46	-0.57	-1.87	-1.3	7.3	19.73
YDL112W	44	-0.93	-0.02	-0.08	3.84	-20	2.77	0.89	-1.72	4.39	1.25	-0.47
YDL116W	52	15.6	0.3	8.03	18.84	-18	13.54	19.28	2.51	-13.71	-12.19	5.37
YDL120W	83	5.53	0.07	18.07	-12.81	-82	18.07	8.38	21.66	12.64	2.45	-1.21
YDL121C	28	-14.7	-0.52	-19.79	-24.68	-22	-16.34	-9.62	13.35	30.88	36.52	19.35
YDL123W	52	24.19	0.47	13.63	7.73	-36	23.9	8.26	6.55	2.14	10.83	9.16
YDL124W	57	-1.57	-0.03	-11.31	13.18	-39	13.37	12.33	-6.45	12.47	37.93	25.9
YDL125C	212	-13.53	-0.06	-4.03	7.15	-22	20.17	5.8	-3.47	14.04	41.05	29.55
YDL126C	41	10.65	0.26	17.11	7.14	-39	18.91	5.46	23.96	15.23	9.22	-12.79
YDL128W	91	31.29	0.34	-3.64	-0.12	-50	43.23	-0.7	11.32	24.64	-15.41	-9.54
YDL130W	18	-37.33	-2.07	-32.24	-31.46	N/A	N/A	15.97	25.08	34.14	44.25	31.64
YDL131W	53	-2.74	-0.05	-3.45	0.41	-39	9.08	-0.63	-5.64	-0.8	14.42	15.76
YDL132W	303	42.31	0.14	6.51	6.2	-66	16.45	6.47	6.83	10.01	-4.09	-5.99
YDL133C-A	24	39.12	1.63	24.53	11.7	-22	24.61	-37.83	-36.65	-15.09	14.31	3.97
YDL134C	486	59.29	0.12	2.22	-3.1	-312	38.4	15.26	11.59	16.4	11.67	3.03
YDL135C	167	-2.36	-0.01	-0.93	-8.18	-84	9.51	0.66	4.91	16.33	18.38	25.9
YDL136W	29	-29.96	-1.03	-30.89	-2.45	-18	2.26	24.23	39.7	7.74	-17.27	-23.95
YDL137W	373	-1.46	0	6.78	-19.22	-319	12.86	6.22	7.92	29.57	39.19	17.79
YDL140C	49	-9	-0.18	-0.85	0.15	-20	1.25	14.91	12.32	2.16	2.3	7.17
YDL141W	186	-6.53	-0.04	0.14	-0.27	-90	10.09	-1.29	11.81	5.46	-4.17	8.3
YDL143W	42	1.66	0.04	6.83	-15.86	-41	6.83	0.08	-11.25	2.97	36.01	31.72
YDL144C	24	-2.26	-0.09	-3.09	-14.08	-22	-2.02	4.91	14.45	16.17	12.64	3.16
YDL145C	240	55.55	0.23	27.01	3.27	-238	27.95	6.74	8.95	6.2	5.64	18.68
YDL147W	41	24.46	0.6	16.11	18.66	-24	21.43	27.94	-11.67	-28.88	7.29	29.58
YDL155W	132	3.61	0.03	5.91	9.38	-21	7.5	19.55	1.92	-4.13	5.59	-0.87
YDL157C	11	-9.18	-0.83	-12.62	N/A	N/A	N/A	4.96	23.21	12.09	-15.53	-7.05
YDL160C	278	111.31	0.4	-0.21	11.54	-227	28.84	24.47	17.93	7.88	8.3	11.75
YDL160C-A	15	4.22	0.28	6.36	N/A	N/A	N/A	2.38	8.04	18.61	26.75	25.79
YDL164C	53	-15.87	-0.3	-11.34	-2.02	-21	-0.27	0.53	12.28	9.45	-0.54	9.5
YDL165W	51	13.7	0.27	6.3	2.24	-33	19.64	-3.85	2.45	1.65	-2.79	5
YDL166C	35	-6.39	-0.18	-3.08	2.54	-18	2.54	5.92	16.21	13.82	4.76	2.47
YDL167C	45	13.2	0.29	8.89	13.9	-18	12.26	6.09	19.72	38.02	22.25	1.89
YDL168W	63	-25.29	-0.4	7.93	-8.94	-62	7.93	15.86	33.84	31.62	5.72	4.04
YDL171C	111	16.68	0.15	-1.5	11.7	-79	13.65	-11.11	-23.18	-0.93	-16.66	-22.39
YDL173W	30	-9.42	-0.31	-9.42	-0.61	-18	-2.51	35.73	34.44	11.28	-2.74	19.62
YDL174C	62	5.36	0.09	-4.12	18.69	-22	10.73	20.66	2.81	-8.4	1.46	15.75
YDL178W	9	-5.84	-0.65	1.86	N/A	N/A	N/A	7.57	8.81	13.05	6.52	-1.52
YDL180W	386	3.97	0.01	-0.65	5.08	-22	13.39	3.27	0.96	3.44	2.7	3.25
YDL181W	88	13.02	0.15	8.65	15.59	-78	19.11	1.2	-41.11	-24.48	1.88	-6.76
YDL182W	22	9.51	0.43	19.12	19.61	-18	21.25	23.84	0.95	-4.39	-5.39	-2.07
YDL184C	24	9.43	0.39	-5.24	-5.4	-20	6.35	-34.67	-36.65	-14.76	13.32	3.31
YDL188C	162	24.43	0.15	16.11	6.47	-158	17.19	-13.05	-11.49	5.74	12.28	10.63
YDL190C	187	6.13	0.03	-23.97	7.34	-145	15.5	-4.52	-0.33	8.16	11.28	12.61
YDL191W	50	-18.26	-0.37	-10.59	3.12	-21	3.48	25.81	39.7	6.53	-18.48	-23.95
YDL192W	38	18.6	0.49	23.45	-5	-27	26.38	-1.51	31.87	35.43	44.08	30.2
YDL193W	63	-10.15	-0.16	3.08	0.75	-62	3.08	-0.77	-5.15	10.89	13.97	7.06
YDL195W	104	-2.61	-0.03	7.63	-14.66	-97	17.21	18.29	11.36	6.99	7.46	-1.64
YDL198C	141	-14.21	-0.1	1.35	-21.72	-51	30.81	27.82	39.22	56.35	37.36	1.9
YDL201W	58	3.66	0.06	0.28	4.37	-45	11.95	9.41	7.38	-4.69	-49.36	-31.15
YDL202W	42	3.48	0.08	3.48	-2.62	-41	3.48	4.15	12.78	8.55	7.51	2.03
YDL203C	88	-6.92	-0.08	-2.65	-4.67	-75	2.99	-7.93	-0.09	1.94	-3.06	0.73
YDL205C	202	40.07	0.2	8.29	10.36	-38	16.39	18.39	22.19	21.48	9.91	5.33
YDL208W	27	6.81	0.25	12.09	22.21	-24	17.41	36.05	22.91	3.51	-27.25	-11.55
YDL212W	47	20.6	0.44	4.28	6.67	-26	36.78	8.25	26.3	17.21	15.42	-16.33
YDL213C	18	0.13	0.01	2.27	3.34	N/A	N/A	8.37	9.2	7.39	2.56	4.19
YDL215C	214	-0.36	0	0	2.88	-55	5.02	4.09	-2.64	-0.54	6.19	6.22
YDL217C	157	-9.23	-0.06	5.53	0.17	-142	15.09	12.84	-7.95	-21.43	1.07	5.31
YDL219W	45	3.36	0.07	5.32	-0.68	-44	5.32	-13.63	-3.63	4.69	-16.7	3.68
YDL224C	366	38.55	0.11	-0.17	4.98	-273	19.12	-1.89	1.41	1.85	1.47	7.45
YDL226C	17	8.85	0.52	9.62	5.29	N/A	N/A	-2.66	8.69	2.94	-8.9	4.57
YDL229W	33	-13.64	-0.41	-10.34	13.95	-18	13.41	24.7	25.32	45.8	64.46	66.64
YDL230W	55	1.99	0.04	0.78	5.62	-21	3.95	4.55	4.42	1.92	-10.79	-14.89
YDL232W	19	-4.59	-0.24	3.44	1.57	-18	3.44	20.25	18.12	8.41	6.27	20.4
YDL235C	101	23.56	0.23	2.74	33.7	-18	26.18	47.37	26.54	-22.03	-35.61	-9.95
YDL236W	27	10.61	0.39	5.58	15.43	-18	12.94	9.36	-0.97	1.41	12.28	19.41
YDL237W	18	7.3	0.41	10.44	-2.64	N/A	N/A	-11.34	-2.96	0.82	8.46	0.28
YDR001C	193	30.68	0.16	10.73	12.79	-18	13.59	18.42	26.37	22.13	-5.54	-8.28
YDR002W	61	-8.36	-0.14	-8.51	7.58	-19	19.82	-13.37	-47.09	-13.31	48.44	65.09
YDR003W	49	4.43	0.09	5.53	-4.25	-41	11.45	-2.84	-8.46	-2.14	3.95	2.92
YDR007W	110	14.19	0.13	1.84	-4.37	-67	21.99	7.61	14.78	2.47	-9.64	-3.14
YDR011W	318	72.84	0.23	5.08	-4.45	-132	21.53	7.77	25.86	8.85	21.84	28.65
YDR012W	36	29.03	0.81	28.75	12.85	-35	28.75	48.48	52.57	31.5	15.02	10.62
YDR013W	41	2.38	0.06	1.07	0.09	-39	3.17	-0.15	0.42	0.92	0.05	6.39
YDR016C	18	-1.31	-0.07	3.14	1.33	N/A	N/A	3.38	2.48	8.99	8.3	0.79
YDR019C	34	5.8	0.17	3.66	10.17	-24	12.31	-10.36	13.86	28.13	15.03	20.22
YDR020C	89	3.82	0.04	2.75	0.86	-40	4.65	-3.38	2.42	5.18	-0.47	-5.35
YDR023W	22	-7.82	-0.36	10.75	22.79	-18	19.87	47.17	40.44	27.17	-8.15	-9.41
YDR025W	17	-4.87	-0.29	20.79	15.11	N/A	N/A	38.45	45.19	37.19	4.32	-0.21
YDR028C	319	22.18	0.07	2.24	10.88	-45	15.58	15.9	1.07	1.21	0.83	3.9
YDR032C	57	1.32	0.02	-1.18	-5.16	-38	28.38	-6.19	-7.6	3.01	9.82	14.09
YDR033W	240	121.47	0.51	45.6	14.17	-232	50.39	-13.7	-7.43	27.29	29.1	29.01
YDR034C-A	3	-1.68	-0.56	-3.12	N/A	N/A	N/A	-1.01	0.22	-0.45	6.61	0.11
YDR035W	81	37.9	0.47	7.15	1.52	-42	33.07	23.42	26.86	4.93	-11.49	-3.29
YDR036C	57	21.6	0.38	2.86	16.14	-23	23.54	13.16	17.05	-1.64	-0.74	11.92
YDR037W	72	4.81	0.07	-9.16	34.84	-24	25.32	36.69	6.73	-12.07	-9.22	-23.56
YDR041W	11	1.2	0.11	-1.35	N/A	N/A	N/A	2.32	17.89	18	-1.27	-1.6
YDR044W	124	5.68	0.05	-10.99	4.23	-45	23.58	27.32	-9.62	-0.63	26.86	7.83
YDR045C	124	16.78	0.14	2.13	-11.47	-62	28.91	12.28	9.87	2.96	0.95	5.41
YDR046C	79	19.2	0.24	-3.76	-0.9	-60	19.88	-5.17	2.74	-16.18	-9.92	11.33
YDR047W	194	25.63	0.13	8.47	15.96	-24	12.57	13.84	5.68	-16.51	-7.42	25.42
YDR050C	32	-30.48	-0.95	-28.51	20.64	-18	12.74	99.97	65.6	52.83	46.49	0.93
YDR051C	32	1.12	0.04	-0.98	-6.23	-28	3.95	-8.13	6.68	13.33	9.51	6.99
YDR054C	173	19.47	0.11	-0.95	1.12	-57	11.94	-3.26	3.59	8.06	2.88	-0.08
YDR055W	51	10.03	0.2	-0.8	13.24	-20	19.52	5.12	-3.51	0.72	20.91	33.41
YDR056C	61	11.88	0.19	17.63	12.51	-57	18.27	28.06	15.93	18.34	26.19	6.94
YDR059C	49	-45.19	-0.92	-4.08	-29.58	-48	-4.08	9.66	-3.72	18.43	32.85	22.31
YDR060W	51	-5.55	-0.11	2.93	-4.7	-38	5.95	4.73	11.71	15.34	2.13	-1.18
YDR061W	57	-6.69	-0.12	-9.57	4.42	-23	6.09	-7.76	-6.23	6.55	2.74	-6.84
YDR062W	74	47.16	0.64	32.37	20.23	-67	48.26	34.98	34.35	46.35	37.76	27.25
YDR063W	105	17.83	0.17	1.18	21.4	-18	23.07	24.35	0.82	-3.89	3.33	5.86
YDR064W	22	-7.67	-0.35	8.18	21.22	-19	12.75	31.59	19.82	31.92	48.64	58.48
YDR071C	79	16.48	0.21	12.8	15.36	-74	22.14	40.1	-2.81	-12.37	-3.95	10.61
YDR072C	683	28.53	0.04	0	0.49	-61	18.4	6.42	33.57	38.73	-5.14	-10.89
YDR073W	155	-9.65	-0.06	-9.03	16.16	-74	26.69	25	-9.99	-20.28	29.66	55.44
YDR074W	77	12.63	0.16	14.35	17.15	-74	17.09	1.98	-20.27	-5.47	13.11	11.13
YDR077W	74	38.02	0.51	8.39	48.01	-18	42	48.63	70.36	65.87	56.33	65.28
YDR079C-A	58	-3.67	-0.06	-0.24	-2.13	-34	6.91	23.74	19.65	2.7	10.74	4.84
YDR084C	56	11.81	0.21	2.99	2.77	-30	15.37	15.09	7.04	11.89	30.79	33.94
YDR086C	108	27.39	0.25	-26.6	23.23	-62	56.9	41.55	14.3	-26.73	-9.25	25.34
YDR090C	116	-16.41	-0.14	-0.01	-26.4	-57	11.57	-8.64	0.37	-0.09	10.28	4.98
YDR091C	75	44.81	0.6	9.84	29.34	-20	34.32	1.51	28.13	16.35	24.46	44.28
YDR092W	74	10.46	0.14	0.23	51.43	-20	49.45	12.52	-21.21	-10.1	0.88	8.21
YDR099W	828	15.79	0.02	0	-20.99	-89	27.36	15.59	15.23	17.88	61.71	3.05
YDR100W	29	-12.26	-0.42	-14.16	-10.08	-22	-4.17	1.59	3.18	-0.85	5.05	6.05
YDR101C	29	5.98	0.21	4.16	12.55	-24	8.94	28.18	18.22	16.32	18.64	12.8
YDR105C	256	16.83	0.07	0	18.66	-27	35.76	-3.82	-10.62	3.44	15.53	17.05
YDR116C	26	-8.29	-0.32	-5.63	-7.21	-21	-2.26	17.4	28.38	22.18	0.5	-21.5
YDR119W	86	-2.76	-0.03	6.59	15.03	-18	8.66	21.39	17.24	-9.59	-14.1	21.83
YDR120C	14	0	0	0.28	N/A	N/A	N/A	1.41	21.14	9.19	-9.47	4.42
YDR121W	99	6.65	0.07	2.88	13.98	-24	15.8	9	0.12	-0.63	-34.56	-37.27
YDR127W	173	-10.71	-0.06	-6.04	-4.37	-68	12.55	16.37	16.44	3.57	-3.45	8.14
YDR129C	59	20.47	0.35	-9.78	30.4	-19	33.99	8.72	-21.5	-13.78	7.71	7.84
YDR135C	37	15.73	0.43	11.32	-1	-31	15.42	4.86	9.15	-1.13	2.4	4.28
YDR139C	27	22.62	0.84	25.46	24.45	-23	33.4	1.63	5.18	9.82	14.56	3.14
YDR140W	87	-0.99	-0.01	0	4.77	-35	2.37	7.63	1.43	6.07	9.56	10.79
YDR143C	46	7.14	0.16	8.05	-4.06	-38	9.12	5.58	9.98	7.09	-1.98	14.52
YDR144C	133	-16.57	-0.12	14.71	-8.47	-129	19.67	17.05	16.67	19.05	22.56	25.76
YDR148C	205	40.25	0.2	1.02	8.16	-61	26.95	24.96	13.73	1.4	-2.76	-7.59
YDR151C	124	33.25	0.27	5.42	16.51	-36	19.14	7.63	6.73	13.4	15.69	-0.26
YDR152W	32	8.87	0.28	9.8	5.51	-31	9.8	21.5	8.15	5.29	13.22	12.47
YDR155C	37	2.3	0.06	-3.49	41.46	-18	43.78	54.74	50.06	38.61	8.63	8.44
YDR156W	36	35.5	0.99	37.57	32.05	-35	37.57	27.85	32.08	21.95	22.78	51.65
YDR158W	23	-12.53	-0.54	-13.06	-24.78	-22	-13.06	-7.34	32.63	48.31	22.79	27.32
YDR161W	38	9.98	0.26	5.6	18.23	-18	19.67	22.39	5.8	-2.13	-3.95	-6
YDR165W	188	0.14	0	-0.93	1.69	-38	15.07	11.94	12.77	-0.48	-0.03	15.43
YDR167W	21	6.26	0.3	10.54	5.47	-20	10.54	3.13	3.54	-5.55	-5.81	-6.29
YDR168W	24	3.36	0.14	0.19	-11.7	-21	1.68	-16.36	-0.72	9.51	26.25	28.22
YDR170C	274	3.59	0.01	2.28	13.78	-22	14.94	-1.65	1.12	9.86	5.5	3.03
YDR172W	38	23.94	0.63	21.78	31.17	-19	32.38	26.58	23.24	23.28	27.72	1.17
YDR174W	19	12.44	0.65	18.6	23.42	-18	18.6	17.16	13.49	17.62	27.26	5
YDR177W	84	4.9	0.06	5.45	10.88	-18	11.31	-8.91	-17.87	3.38	11.12	12.3
YDR178W	188	6.59	0.04	-0.93	-22.04	-44	21.19	-4.13	-0.74	-5.59	-4	-6.46
YDR182W	42	-7.88	-0.19	-9.54	-9.1	-20	-4.8	2.16	-2	2.14	12.45	7.07
YDR186C	49	19.83	0.4	-0.76	26.24	-18	27.81	12.07	0.4	5.41	17.36	12.62
YDR188W	49	12.65	0.26	7.39	45.3	-19	35.29	46.2	-21.9	-32.51	12.18	21.43
YDR189W	45	9.44	0.21	8.3	6.77	-43	9.36	9.79	8.01	8.89	3.89	-0.29
YDR190C	50	8.66	0.17	7.94	13.77	-37	10.84	17.23	9.16	15.07	-0.06	-0.4
YDR194C	25	10.54	0.42	10.54	3.24	-24	10.54	-3.28	-3.98	1.91	21.12	22.46
YDR196C	31	-7.78	-0.25	-7.78	0.67	-18	-0.4	18.56	9.38	2.05	16.3	23.4
YDR204W	95	-20.68	-0.22	0	-5.88	-54	1.34	-5.27	6.83	18.32	2.46	-12.24
YDR205W	10	-3	-0.3	2.58	N/A	N/A	N/A	4.75	4.28	0.91	-4.43	-0.61
YDR206W	153	1.46	0.01	0.27	2.28	-36	17.8	0	5.48	-4.46	-15.63	0.64
YDR208W	38	16.38	0.43	16.24	12.31	-35	17.94	6.4	12.68	28.62	18.17	7.37
YDR210W	35	-37.31	-1.07	-37.44	-9.51	-18	-15.91	28.39	17.25	-20.97	-13.4	-4.12
YDR211W	58	5.94	0.1	1.34	6.68	-20	6.68	4.6	16.18	11.5	7.64	20.85
YDR212W	62	6.84	0.11	17.36	-6.75	-61	17.36	4.95	3.89	-1.78	8.98	-19.82
YDR214W	106	15.24	0.14	1.86	3.34	-63	23.72	-2.95	-0.24	23.92	17.19	-1.55
YDR221W	25	-6.99	-0.28	-7.62	-6.27	-19	-5.34	7.6	7.9	4.02	6.02	10.5
YDR222W	72	-10.24	-0.14	-1.49	7.53	-19	8.63	5.02	-0.79	6.97	10.27	1.2
YDR224C	36	10	0.28	14.9	29.12	-20	19.69	38.53	46.04	29.57	5.3	21.88
YDR225W	63	10.27	0.16	27.73	-10.08	-62	27.73	20.52	32.46	21.25	13.39	12.66
YDR226W	45	-7.79	-0.17	25.16	-23.27	-43	27.16	6.27	-6.93	-4.92	20.96	14.25
YDR231C	27	-11.44	-0.42	-13.24	-5.87	-19	-9.97	9.58	-5.26	-5.48	-5.63	-7.45
YDR232W	229	39.22	0.17	15.49	22.53	-19	27	13.88	10.66	24.75	43.45	49.92
YDR233C	28	16.44	0.59	22.79	74.3	-18	64.86	73.34	17.63	-24.04	-3.74	35.59
YDR234W	252	4.1	0.02	0.14	15.9	-33	14.73	19.54	14.72	1.79	-11.96	-5.32
YDR236C	19	-0.85	-0.04	0.75	1.68	-18	0.75	5.31	7.23	0.28	0.01	9.53
YDR237W	144	-10.82	-0.08	-19.34	20.28	-18	18.89	19.31	15.87	16.97	17.51	17.54
YDR238C	141	-8.84	-0.06	0	-2.42	-73	7.12	18.9	21.03	-5.25	-6.55	19.77
YDR245W	58	-6.68	-0.12	-9.47	5.23	-31	16.7	26.74	28.17	11.04	6.44	7.69
YDR248C	61	25.51	0.42	14.79	20.12	-24	21.34	17.78	12.95	11.2	11.8	24.74
YDR249C	30	3.77	0.13	4.84	4.1	-29	4.84	1.35	-0.02	7.75	7.01	-1.39
YDR251W	278	54.35	0.2	2.47	15.15	-194	26.02	11.67	5.66	8.72	12.5	9.4
YDR257C	11	1.34	0.12	-9.54	N/A	N/A	N/A	-13.98	-8.03	-7.01	-3.52	-2.21
YDR260C	39	16.39	0.42	15.2	2.2	-37	15.33	-7.49	9.85	24.15	12.1	4.75
YDR261C	65	-7.45	-0.11	2.42	1.89	-24	3.1	5.95	0.92	1.05	16.35	13.47
YDR262W	39	-5.58	-0.14	-3.36	-6.83	-28	-1.81	0.72	0.91	-6.78	-1.91	-3.54
YDR264C	58	34.59	0.6	30.85	-31.02	-53	36.04	-14	11.66	-39.82	-39.74	40.83
YDR265W	104	-23.41	-0.23	-2.34	-18.53	-46	2.78	-9.85	-12.73	0.37	24.49	8.44
YDR266C	218	29.21	0.13	8.07	0.07	-114	23.12	8.05	11.66	15.18	8.85	26.78
YDR267C	46	12.4	0.27	13.28	-3.41	-45	13.28	-2.85	1.62	0.87	5.09	12.25
YDR268W	84	-4.77	-0.06	-0.29	-8.12	-46	2.58	-4.32	0.95	-0.7	0.09	15.21
YDR272W	43	8.59	0.2	8.45	4.77	-42	8.45	-2.94	-11.06	8.79	10.09	-11.3
YDR276C	52	-20.61	-0.4	5.54	-8.19	-51	5.54	27.92	24.95	47.68	-9.76	-43.78
YDR280W	151	0.83	0.01	-3.76	1.71	-92	12.25	29.33	20.6	-7.05	-11.74	7.58
YDR281C	42	23.25	0.55	21.19	-0.94	-39	24.44	-1.6	5.24	3.69	1.9	5.15
YDR284C	267	37.34	0.14	-14.87	13.09	-29	25.73	8.73	19.58	4.2	3.43	2.23
YDR286C	39	-0.09	0	-1.76	1.19	-25	3.48	0.59	-5.35	-2.87	1.42	-2.4
YDR288W	49	-2.3	-0.05	-1.51	-6.37	-18	0.92	-18.09	-8.15	-8.83	-3.73	3.17
YDR292C	117	-2.56	-0.02	-21.35	5.98	-47	16.01	21.86	38.42	35.07	10.08	3.55
YDR293C	200	14.58	0.07	4.17	2.4	-146	15.21	8.05	21.63	21.64	18.38	13.67
YDR294C	38	1.81	0.05	6.45	10.31	-35	13.24	-1.02	-5.78	7.11	16.46	13.76
YDR296W	56	7.48	0.13	9.2	-5.3	-44	15.23	3.32	6.94	9.55	7.4	-2.5
YDR297W	60	-12.72	-0.21	-5.01	-17.47	-45	-2.66	21.59	57.48	32.68	19.1	33.95
YDR298C	134	7.59	0.06	-11.18	-0.84	-84	21.81	-16.3	-5.08	42.2	65.69	40.44
YDR300C	144	-19.42	-0.13	0	-31.8	-47	11.32	-1.75	-0.28	6.53	-15	-24.29
YDR302W	144	6.55	0.05	0	1.35	-50	17.23	15.73	17.25	21.96	28.77	12.71
YDR304C	43	-18.04	-0.42	-9.62	-10.06	-20	-7.5	3.57	11.52	7.88	15	46.61
YDR307W	69	-4.32	-0.06	-11.53	3.62	-31	8.14	12.17	-0.89	-9.46	12.18	14.38
YDR309C	52	4.06	0.08	3.99	-5.14	-43	5.53	-0.1	-4.26	18.43	26.89	14.95
YDR319C	138	16.45	0.12	0	4.64	-52	16.8	4.38	5.51	9.68	19.81	14.02
YDR321W	28	25.24	0.9	25.29	6.62	-27	25.29	-10.71	-13.94	-20.99	11.76	37.44
YDR322C-A	34	-2.25	-0.07	-0.39	-1.03	-23	3.85	6.99	9.09	5.91	3.35	-3.07
YDR326C	186	26.29	0.14	-0.74	9.82	-121	20.41	0.24	-8.11	-11.45	2.96	33.38
YDR328C	69	-28.3	-0.41	-19.71	25.49	-20	23.31	36.66	12.18	5.15	-11.86	-10.02
YDR329C	42	8.45	0.2	10.26	9.53	-37	13.47	6.73	3.26	1.26	-4.12	-0.44
YDR333C	36	12.02	0.33	12.64	7.62	-34	13.24	-10.74	-23.81	-3.61	9.25	6.59
YDR335W	362	24.3	0.07	6.54	10.7	-54	11.45	9.09	4.44	15.29	13.94	3.96
YDR337W	51	-29.81	-0.58	7.28	-41.69	-48	7.34	-1.62	6.52	4.14	-1.36	1.01
YDR339C	29	4.96	0.17	6.63	6.69	-23	9.7	8.21	-2.3	7.2	13.93	15.48
YDR341C	65	-47.7	-0.73	3.32	-1.03	-64	3.32	24.94	23.19	23.72	34.41	13.54
YDR345C	104	-33.06	-0.32	2.14	-1.96	-103	2.14	25.51	28.84	40.92	84.89	56.69
YDR346C	159	1.08	0.01	3.64	-13.85	-65	12.03	-16.2	-5.19	5.87	14.62	12.26
YDR347W	91	-4.18	-0.05	2.61	0.89	-82	9.85	2	12.26	9.98	4.48	1.41
YDR348C	225	12.3	0.05	-4.09	-19.26	-130	17.45	3.15	-0.84	-13.76	-4.01	10.87
YDR349C	91	-2.3	-0.03	-6.17	19.62	-20	31.67	7.32	11.09	1.76	0.82	10.95
YDR352W	103	21.84	0.21	18.72	5.92	-100	18.91	13.34	14.68	10.46	14.36	2.09
YDR353W	40	44.31	1.11	52.48	-9.52	-37	54.43	-37.76	6.08	47.43	40.94	41.01
YDR354W	98	-3.26	-0.03	13.8	1.59	-87	38.38	3.54	0.85	2.02	14.55	16.73
YDR357C	76	26.83	0.35	7.38	25.85	-18	21.86	16.77	-12.1	-14.21	2.91	10.5
YDR361C	34	15.72	0.46	14.65	10.72	-31	15.72	2.74	2.14	6.95	26.88	21.17
YDR363W-A	24	-0.95	-0.04	1.6	11.57	-18	4.17	33.66	21.76	0.14	-2.33	-11.25
YDR367W	91	-27.01	-0.3	0.28	-17.14	-54	7.31	-0.14	9.1	16.48	5.06	-7.93
YDR368W	72	-16.1	-0.22	-3.35	14.17	-20	34.59	20.63	10.16	-2.97	3.18	40.28
YDR372C	251	2.19	0.01	1.89	2.98	-63	14.89	-0.48	10.02	12.85	17.67	24.56
YDR373W	62	0.8	0.01	1.73	12.97	-18	12.8	18.35	5.76	3.03	-0.95	8.16
YDR374W-A	42	-6.92	-0.16	-4.2	-19.95	-41	-4.2	-9.45	12.6	14.66	-1.98	-15.02
YDR375C	14	9.43	0.67	14.12	N/A	N/A	N/A	13.69	17.86	6.4	8.39	8.49
YDR376W	42	0.14	0	1.07	-9.12	-25	2.28	-3.15	20.1	11.82	-3.58	7.84
YDR377W	77	-24.31	-0.32	-15	-8.04	-22	9.59	11.5	27.87	12.15	14.4	25.17
YDR378C	12	4.27	0.36	18.54	N/A	N/A	N/A	-2.27	-30.06	7.26	11.93	5.37
YDR380W	147	-13.21	-0.09	1.07	14.22	-21	10.17	11.19	-10.29	-5.6	12.43	9.4
YDR381W	85	-15.71	-0.18	-10.46	25.67	-18	10.45	20.5	18	-8.49	2.58	17.08
YDR382W	67	-28.34	-0.42	-18.38	-12.82	-48	10.36	-24.79	23.87	79.32	58.19	-10.73
YDR384C	82	18.33	0.22	16.28	-9.32	-73	30	-8.12	4.52	10.14	23.96	1.73
YDR385W	29	-16.16	-0.56	-19.78	21.85	-19	12.74	72.67	73.72	32.76	21.63	66.95
YDR387C	138	35.09	0.25	0.17	15.2	-33	24.16	-6.05	-9.86	10.13	17.51	22.95
YDR388W	44	-2.84	-0.06	5.49	-9.98	-43	5.49	8.76	14.84	12.08	15.38	3.67
YDR390C	21	-0.62	-0.03	1.22	3.79	-20	1.22	8.22	-0.39	-7.89	2.09	7.7
YDR391C	16	-7.4	-0.46	0.03	0.03	N/A	N/A	18.04	8.14	4.75	5.16	6.05
YDR394W	93	0.6	0.01	7.35	-11.35	-71	14.94	11.62	10.04	9.06	18.62	16.95
YDR395W	107	6.54	0.06	10.66	19.58	-18	22.51	19.8	-0.73	-11.07	6.45	7.66
YDR397C	52	-4.18	-0.08	2.96	7.57	-51	2.96	23.13	20.87	14.44	-2.56	-22.71
YDR398W	163	-1.89	-0.01	-1.97	17.02	-21	17.2	22.61	13.57	-21.01	-12.81	3.58
YDR399W	57	-7.4	-0.13	-6.53	-2.8	-34	5.76	11.7	-15.9	-35.31	-16.15	-23.67
YDR400W	207	14.39	0.07	-0.08	11.99	-38	19.33	9.29	2.22	10.11	7.01	3.29
YDR404C	195	44.49	0.23	18.34	-13.64	-85	20.88	1.55	23.71	5.34	-6.7	-3.42
YDR408C	59	4.17	0.07	23.32	-16.82	-58	23.32	-6.91	1.86	27.16	28.17	10.7
YDR410C	35	-4.63	-0.13	-2.93	-28.94	-34	-2.93	-34.42	-8.69	21.25	20.44	44.15
YDR411C	52	16.39	0.32	22.33	5.56	-51	22.33	18.28	17.39	5.07	4.59	-2.03
YDR414C	162	10.53	0.06	1.6	4.64	-125	8.3	-12.82	-13.6	1.82	4.26	2.64
YDR415C	47	5.61	0.12	8.33	-20.31	-42	9.26	-16.52	-1.08	1.99	2.69	0.86
YDR422C	179	4.03	0.02	-8.31	7.44	-30	8.2	-0.99	-4.64	4.8	12.59	7.22
YDR424C	17	-3.84	-0.23	-5.3	-5.3	N/A	N/A	4.94	7.07	8.62	-3.74	-7.51
YDR427W	33	17.31	0.52	17.31	10.98	-28	19.93	1.04	-0.16	8.07	16.12	19.41
YDR429C	19	0.62	0.03	-10.22	-5.44	-18	-10.22	-7.16	4.85	16.16	15.63	6.53
YDR434W	98	21.05	0.21	-2.98	18.07	-36	26.5	0.37	-3.39	11.69	18.26	6.82
YDR435C	27	-4.37	-0.16	-3.49	7.35	-18	6.25	15.48	-5.29	-15.99	-3.07	14.03
YDR441C	217	6.81	0.03	-2.55	18.85	-93	21.54	13.58	-5.13	-1.76	13.78	17.22
YDR447C	19	-27.35	-1.44	-18.52	-9.28	-18	-18.52	56.1	36.75	-9.41	14.39	21.63
YDR450W	24	-17.48	-0.73	-13.14	14.92	-18	13.15	-3.88	-20.14	-13.43	27.55	14.05
YDR451C	96	5.08	0.05	0	8.24	-20	8.1	10.17	2.45	-1.55	6.64	16.04
YDR452W	152	-8.86	-0.06	0.67	-3.49	-51	7.24	15.29	4.02	-5.6	3.77	11.89
YDR454C	39	-7.94	-0.2	-15.39	28.18	-18	11.77	55	33.8	24.94	14.95	12.26
YDR459C	77	11.23	0.15	7.39	0.61	-55	13.7	6.58	-3.12	7.71	-2.79	-14.07
YDR461C-A	21	-17.35	-0.83	-12.94	-8.9	-18	-11.87	-10.39	-30.36	-6.27	3.71	6.84
YDR462W	39	5.72	0.15	8.31	0.31	-38	8.31	-2.21	4.4	12.81	10.93	11.33
YDR463W	17	1.32	0.08	8.58	7.51	N/A	N/A	16.33	16.65	6.34	7.31	26.49
YDR465C	46	17.96	0.39	17.82	0.23	-43	21.32	5.36	17.99	18.2	16.1	9.9
YDR469W	24	-1.72	-0.07	-0.65	1.07	-19	2.14	11.78	9.65	-5.35	2.04	14.98
YDR471W	21	-10.13	-0.48	-2.19	-9.33	-20	-2.19	8.39	-0.49	6.99	22.66	10.08
YDR472W	384	-4.7	-0.01	-22.36	-4.12	-336	21.09	-32.4	-7.11	38.42	31.04	24.83
YDR476C	9	-2.43	-0.27	-22.03	N/A	N/A	N/A	-8.18	3.74	11.37	4.76	23.56
YDR477W	252	16.46	0.07	-1.98	13.78	-18	15.84	13.78	4.37	14.75	15.86	-2.87
YDR482C	112	16.34	0.15	-2.15	12.18	-21	13.51	0.68	1.01	7.32	15.46	-0.4
YDR483W	68	15.94	0.23	0.41	20.48	-31	17.36	-6.51	-9.27	-5.34	-2.46	11.35
YDR486C	29	4.8	0.17	5.12	17.01	-18	8.93	10.45	-4.09	-1.91	5.74	16.79
YDR487C	58	-6.63	-0.11	-1.33	36.51	-18	24.76	15.09	-48.63	-40.69	24.66	17.98
YDR492W	157	27.4	0.17	17.22	2.14	-90	22.92	-11.59	14.28	21.77	5.16	7.92
YDR493W	86	-7.29	-0.08	-9.5	-20	-75	16.21	-21.49	-20.1	0.95	36.82	22.5
YDR496C	39	1.18	0.03	-1.9	9.35	-19	8.73	-3.1	-15.64	-0.02	8.09	-8.6
YDR497C	77	-4.86	-0.06	19.31	12.1	-74	25.17	33.14	55.62	10.5	4.85	30.81
YDR498C	33	-4.73	-0.14	-1.9	-3.47	-32	-1.9	-10.22	-13.55	-2.61	3.81	-4.35
YDR500C	9	-10.31	-1.15	-2.04	N/A	N/A	N/A	7.52	10.3	-8.39	11.8	24.82
YDR502C	33	3.68	0.11	2.31	17.74	-19	18.12	30.34	30.48	25.47	13.9	11.58
YDR503C	24	-7.54	-0.31	-4.67	-13.1	-22	-4.1	-6.17	-9.41	-2.81	5.21	8.39
YDR508C	131	21.85	0.17	0	14.54	-34	21.46	13.58	20.38	8.56	3.23	23.84
YDR510W	70	9.06	0.13	7.41	-1.49	-48	14.8	28.74	31.67	26.39	29.45	1.79
YDR511W	6	0	0	0.53	N/A	N/A	N/A	-1.69	-6	-9.59	3.94	-0.39
YDR516C	99	-38.03	-0.38	0.28	-16.95	-59	3.94	0.84	2.66	3.59	7.8	13.02
YDR517W	146	54.43	0.37	-1.48	21.49	-61	37.02	14.21	12.24	-4.49	-0.02	14.56
YDR518W	20	0.02	0	1.88	5.39	-18	5.43	14.7	26	23.87	9.8	17.58
YDR519W	48	26.26	0.55	12.65	-2.52	-31	17.94	-11.24	19.33	33.43	22.01	-12.82
YDR524C-B	25	-2.34	-0.09	-2.76	11.44	-19	-1.25	42.48	67.08	53.11	39.37	47.82
YDR525W-A	77	20.11	0.26	9.58	0.85	-56	20.22	4.41	-1.27	-15.19	-18.14	-22.78
YDR529C	47	-46.24	-0.98	-16.71	-15.91	-43	-11.98	14.85	11.12	-0.56	0.82	20.94
YDR530C	33	1.98	0.06	-0.12	-2.95	-31	1.98	-3.77	4.03	3.86	-0.2	8.18
YDR531W	44	8.6	0.2	3.99	-0.62	-30	16.28	-3.8	14.42	21.09	21.5	18.67
YDR533C	59	-5.88	-0.1	6.27	-11.9	-55	7.34	0.45	18.31	16.4	-3.81	2.04
YDR539W	95	-0.21	0	-0.09	-13.41	-70	6.22	-6.2	4.02	4.28	9	11.16
YDR541C	239	21.21	0.09	-1.36	-3.62	-192	13.02	12.09	24.46	19.21	2.07	-7.04
YEL001C	26	9.49	0.37	12.46	20.52	-18	18.67	20.11	17.84	41.97	33.67	17.26
YEL002C	54	-22.07	-0.41	-15.21	-0.7	-46	7.8	11.81	6.02	21.58	9.93	-3.46
YEL006W	5	1.07	0.21	17.16	N/A	N/A	N/A	17.08	-29.49	-19.45	12.78	0.11
YEL007W	235	94.79	0.4	1.07	26.35	-42	35.68	32.25	21.79	12.58	7.43	17.2
YEL009C	572	242.6	0.42	33.47	31.85	-195	61.46	21.02	24.63	25.91	26.78	-9.99
YEL015W	24	5.59	0.23	5.86	7.72	-20	7.86	6.28	3.14	0.79	11.55	18.5
YEL016C	166	-5.36	-0.03	-4.81	-5.81	-61	21.57	2.74	2.14	-3.35	-6.83	1.96
YEL017C-A	31	-9.08	-0.29	-9.08	-23.01	-28	-6.68	-12.27	12.33	42.44	33.96	17.66
YEL017W	129	6.04	0.05	0.14	-5.12	-41	15.64	17.87	5.49	4.19	8.71	5.41
YEL024W	178	0.84	0	-0.93	19.03	-18	11.59	30.2	27.77	4.66	-2.91	15.12
YEL025C	38	-0.95	-0.02	0.91	1.76	-36	1.84	2.41	-2.27	-1.2	1.21	-0.65
YEL026W	106	-6.94	-0.07	-35.94	-5.68	-52	40.62	19.08	27.61	19.03	-1.86	28.5
YEL027W	58	10.39	0.18	5.77	-6.33	-39	18.19	-0.92	-6.44	21.5	12.55	-23.46
YEL029C	67	-0.4	-0.01	-5.69	5.04	-36	14.08	16.24	3.43	-8.76	-1.97	-16.26
YEL031W	22	7.45	0.34	6.29	13.86	-18	6.46	9.04	9.02	29.15	37.86	15.33
YEL032W	54	-2.89	-0.05	21.49	-20.98	-53	21.49	-4.92	-2.31	17.7	32.46	23.59
YEL036C	123	16.84	0.14	1.48	5.11	-51	19.01	9.79	19.43	15.31	7.6	11.55
YEL037C	152	65.31	0.43	10.63	16.1	-46	27.31	13.03	-0.08	-1.1	5.23	1.96
YEL038W	27	3.54	0.13	-5.46	-38.46	-24	-0.29	-36.31	-3.83	3.56	30.04	9.01
YEL040W	39	-18.81	-0.48	-3.56	-38.41	-38	-3.56	-4.4	32.76	24.03	24.4	-13.37
YEL042W	151	13.39	0.09	-22.14	12.1	-88	30.03	21.1	22.44	23.54	12.91	25
YEL043W	9	2.28	0.25	7.95	N/A	N/A	N/A	3.93	-1.05	2.42	4.96	18.01
YEL044W	103	-5.45	-0.05	-0.93	1.72	-18	0.65	16.63	19.08	-9.31	-35.01	-23
YEL047C	3	-1.5	-0.5	9.31	N/A	N/A	N/A	11.88	-4.31	-5.43	17.6	21.2
YEL048C	17	-10.17	-0.6	-27.98	-30.25	N/A	N/A	-20.11	4.72	3.19	-3.95	-4.41
YEL050C	47	-12.62	-0.27	2.52	-7.25	-46	2.52	9.72	-3.29	-5.39	17.09	20.43
YEL051W	43	3.01	0.07	21.13	-20.7	-42	21.13	17.36	11.27	-27.94	-35.85	-0.59
YEL052W	89	13.63	0.15	4.84	7.62	-29	11.33	1.75	11.86	12.16	11.18	14.98
YEL056W	53	7.17	0.14	6.43	1.71	-50	9.17	-7.52	7.07	16.48	4.79	8.66
YEL058W	33	20.41	0.62	18.6	9.39	-21	23.59	13.99	27.59	26.7	11.75	24.83
YEL059C-A	127	-11.04	-0.09	0	6.61	-19	6.75	29.32	23.94	-8.94	-25.73	-16.99
YEL060C	257	-2.88	-0.01	0	-11.13	-62	8.05	-0.67	12.54	11.78	2	6.93
YEL063C	39	4.42	0.11	3.21	9.44	-21	10.37	14.68	11.14	2.15	3.69	8.87
YEL065W	133	-10.81	-0.08	-7.29	0.08	-35	2.9	9.59	8.58	30.22	55.07	38.15
YEL071W	51	-9.28	-0.18	5.3	-4.62	-40	13.59	20.32	23.26	25.79	2.02	-20.3
YER001W	172	14.2	0.08	-1.86	13.34	-33	15.01	-26.28	-27.58	16.4	21.25	10.93
YER003C	30	-2.04	-0.07	-2.92	0.39	-22	6.36	35.27	11.49	-19.36	10.81	38.64
YER004W	156	20.8	0.13	13	6.97	-154	15	7.67	-5.15	-46.84	-50.53	-15.38
YER006W	23	-23.13	-1.01	-45.82	-48.73	-20	-43.12	-19.18	0.27	2.25	4.05	-0.02
YER007C-A	31	-4.65	-0.15	-4.65	-1.63	-20	-3.48	-3.62	-3.34	9.11	10.17	5.27
YER009W	17	3.41	0.2	44.41	50.63	N/A	N/A	76.26	58.05	11.47	-37.74	23.25
YER010C	96	-0.4	0	1.07	10.91	-18	5.76	-7.04	-6.63	23.23	21.83	6.26
YER011W	65	-2.69	-0.04	1.01	-21.3	-40	14.88	5.17	31.35	37.42	33.42	0.91
YER012W	48	-25.41	-0.53	-11.37	-12.97	-47	-11.37	30.14	38.18	17.26	15.09	10.68
YER014W	35	0.19	0.01	-2.69	5.55	-20	4.48	1.64	2.88	0.74	1.67	-2.43
YER018C	96	-3.91	-0.04	-0.19	5.17	-54	13.35	34.47	36.85	16.68	-0.17	7.01
YER019C-A	62	-50.4	-0.81	-38.62	-8.89	-29	-5.64	3.61	-19.47	-21.21	16.62	45.48
YER019W	113	1.21	0.01	0	0.14	-61	1.21	1.81	-0.76	9.08	24.21	17.02
YER020W	107	14.96	0.14	-0.38	1.57	-36	16.99	3.58	4.32	7.89	-16.98	-14.41
YER021W	51	4.19	0.08	0.64	26.58	-18	27.51	27.81	25.61	35.9	26.39	47.66
YER023W	28	18.93	0.68	9.73	-10.51	-27	9.73	-21.45	3.41	37.21	24.38	0.72
YER025W	46	20.28	0.44	13.38	5.73	-29	21.29	4.46	11.04	-11.24	3.76	25.7
YER026C	68	-3.36	-0.05	3.81	-2.85	-39	10.24	26.85	53.68	49.45	6.49	-2.43
YER027C	109	-8.67	-0.08	0.45	9.91	-54	8.59	10.64	5.2	13.81	4.69	1.86
YER031C	25	4.92	0.2	7.15	4.4	-22	10.81	18.1	14.4	-10.24	-18.97	4.02
YER034W	44	0.14	0	0.14	4.28	-18	4.28	4.28	3.17	1.45	4.52	8.38
YER035W	208	16.84	0.08	-0.93	18.78	-19	15.28	12.41	-8.85	-7.59	4.97	14.04
YER036C	24	2.55	0.11	10.15	24.45	-18	15.8	42.32	25.15	9.81	-5.85	-7.64
YER043C	18	-8.57	-0.48	15	20.09	N/A	N/A	0.36	-21.46	21	19.34	12.72
YER044C	72	32.2	0.45	15.16	4.82	-58	27.36	-18.52	-22.92	9.11	11.23	21.11
YER048C	67	8.23	0.12	5.16	1.79	-51	9.07	9.8	15.39	18.5	19.8	7.11
YER048W-A	70	-5.6	-0.08	-2.91	2.24	-19	9.57	-13.5	-9.93	15.88	24.13	16.28
YER049W	99	-17.48	-0.18	-4.48	-11.73	-57	0.14	-6.63	-6.02	-0.04	10.1	6.47
YER050C	33	-5.08	-0.15	-5.08	4.03	-19	4.23	4.96	2.89	18.06	14.42	6.52
YER052C	81	18.94	0.23	12.51	12.51	-73	18.5	6.16	-26.52	-1.69	24.29	1.04
YER055C	90	-16.25	-0.18	10.39	-20.6	-84	16.56	5.73	9.16	-15.43	-32.7	-9.54
YER056C	89	34.79	0.39	-1.19	-9.99	-61	47.4	28.17	61.1	24.45	-15.97	6.83
YER056C-A	20	15.72	0.79	32.49	43.17	-18	33.72	37.76	27.83	27.43	-0.28	9.34
YER057C	30	-20.68	-0.69	-19.47	-25.91	-29	-19.47	14.29	-2.24	15.31	45.07	17.77
YER060W	147	22.7	0.15	-2.83	22.84	-48	18.36	26.08	14.84	8.21	9.14	16.67
YER062C	199	-14.65	-0.07	0	-18.69	-72	28.55	-10.03	14.95	34.05	28.14	3.6
YER063W	67	8.11	0.12	5.43	-7.96	-41	13.38	3.85	1.71	2.27	3.31	-6.6
YER064C	94	2.19	0.02	1.71	-6.33	-62	12.81	-4.2	0.95	-9.41	-6.67	-6.72
YER070W	40	18.8	0.47	14.36	13.72	-18	18.13	13.06	19.34	20.39	12.56	2.95
YER072W	43	-26.28	-0.61	-11.26	22.03	-18	10.6	50.77	20.02	6.16	-14.84	-28.71
YER073W	176	-19.72	-0.11	-1.96	-5.52	-55	12.17	5.91	2.49	-1.99	-0.87	2.97
YER074W	29	-19.34	-0.67	-26.3	-15.81	-21	-18.54	-10.17	-7.64	12.27	15.1	37.06
YER074W-A	30	-4.75	-0.16	-5.68	4.73	-18	3.57	15.79	0.66	3.24	15.99	9.77
YER078C	55	-0.87	-0.02	-11.83	11.26	-21	10.97	-3.74	0.42	9.1	4.09	5.35
YER081W	202	4.24	0.02	-4.64	12.42	-19	10.45	9.91	17.45	13.72	-1.02	3.36
YER082C	75	27.12	0.36	0.55	4.2	-59	24.3	4.28	2.74	-1.15	4.29	4.51
YER083C	20	2.69	0.13	1.67	-0.51	-19	1.67	10.43	23.91	27.28	24.67	23.79
YER086W	64	25.46	0.4	8.69	39.83	-18	31.56	53.27	42.36	66.96	46.21	-7.04
YER087C-B	35	29.66	0.85	27.55	27.16	-19	33.56	24.96	1.67	-7	14.92	24.71
YER088C	462	94.79	0.21	18.74	23.99	-20	29.98	23.84	23.57	17.29	13.95	20.96
YER089C	305	29.79	0.1	8.15	2.58	-76	18.91	13.18	12.23	18.7	30.08	9.94
YER090W	52	31.24	0.6	38.2	-13	-51	38.2	2.3	10.03	2.06	1.87	-6.62
YER091C	55	-15.83	-0.29	-6.65	9.31	-18	7.82	23.84	21.61	-2.67	-0.86	17.01
YER094C	215	-36.15	-0.17	-1.86	-32.29	-52	31.12	22.66	18.58	20.79	16.92	20.65
YER095W	56	-4.19	-0.07	-7.85	8.33	-22	15.24	10.01	15.8	22.54	17.49	30.44
YER099C	272	12.41	0.05	0.37	11.74	-18	10.24	7.3	5.2	15.5	17.72	10.41
YER100W	266	35.29	0.13	3.35	2.9	-40	18.71	-3.47	-8.76	-11.45	-0.35	24.37
YER102W	369	0.41	0	0.13	-27.61	-260	15.76	29.92	43.95	23.81	26.56	6.42
YER105C	39	14.19	0.36	14.19	11.35	-26	20.91	-2.89	12.71	23.32	-3.11	-10.14
YER107C	178	11.1	0.06	9.39	-16.88	-97	25.81	6.49	4.89	9.75	14.97	4.41
YER110C	37	19.88	0.54	13.64	13.12	-24	22.68	-9.13	12.72	47.23	46.27	22.53
YER117W	32	-30.54	-0.95	-31.47	-31.91	-24	-25.61	-9.38	2.8	0.49	0.01	12.38
YER118C	197	57.55	0.29	5.92	11.32	-108	27.2	17.89	11.12	10.57	10.04	3.26
YER119C	137	-1.05	-0.01	2.1	-6.19	-60	4.24	-5.99	6.27	14.21	-1.41	-3.62
YER120W	28	-8.2	-0.29	-2.67	47.79	-18	36.24	67.27	56.3	13.24	-0.43	24.13
YER122C	83	1.62	0.02	-0.92	-12.4	-50	18.85	19.37	41.3	35.78	5.85	-0.76
YER124C	50	22.72	0.45	16.51	-2.04	-42	27.84	-0.07	-1.4	-2.01	4.59	8.2
YER125W	509	15.08	0.03	-2.11	14.88	-247	23.84	26.14	11.45	8.94	22.75	28.51
YER126C	27	0.66	0.02	3.4	9.88	-20	13.48	10.48	-0.83	4.78	6.11	-8.08
YER127W	21	7.08	0.34	8.15	6.16	-20	8.15	1.35	4.32	11.62	3.79	-6.55
YER131W	363	-12.29	-0.03	0.55	-3.37	-241	8.03	13.08	21.26	22.48	31.55	51.88
YER133W	61	31.03	0.51	11.3	15.82	-37	30.91	14.57	11.52	16.35	39.48	47.71
YER134C	38	12.51	0.33	12.51	3.74	-31	14.37	16.77	25.87	16.23	-2.03	1.93
YER136W	81	29.87	0.37	5.77	14.81	-58	28.76	23.43	5.83	-2.57	10.85	7.38
YER141W	213	2.49	0.01	-1.59	3.81	-20	19.43	-27.67	-8.39	10.29	18.23	24.53
YER143W	67	-0.01	0	0	-3.08	-52	1.85	1.5	18.19	21.12	-3.95	-9.86
YER145C	30	37.23	1.24	40.15	18.92	-23	51.77	-2.05	8.86	17.37	-14.59	-2.02
YER147C	43	6.69	0.16	3.95	8.21	-18	8.54	7.27	0.55	0.26	6.83	-1.54
YER149C	59	-2.7	-0.05	-1.03	-1.14	-22	1.3	1.44	3.64	15.25	10.9	0.86
YER150W	22	1.31	0.06	2.19	3.45	-20	3.12	10.38	6.04	8.84	4.8	2.01
YER154W	26	8.22	0.32	9.42	-0.69	-24	10.49	-4.1	3.61	8.33	5.03	-2.94
YER155C	60	4.57	0.08	0.27	13.22	-18	10.63	-8.17	-10.63	0.05	6.04	7.9
YER156C	8	13.65	1.71	18.06	N/A	N/A	N/A	5.64	-3.28	-5.68	-6.39	2.8
YER159C	169	8.7	0.05	4.71	14.8	-19	18.01	17.64	15.63	5.8	2.22	7.54
YER163C	37	1.83	0.05	-1.69	-18.9	-32	1.61	-9.6	8.34	6.63	18.02	25.71
YER165W	134	13.41	0.1	1.11	33.83	-105	38.06	43.18	6.58	-10.7	-11.35	25.31
YER168C	47	4.72	0.1	4.29	2.71	-29	6.25	-8.27	-4.2	5.02	-1.19	8.11
YER177W	41	10.71	0.26	26.49	-6.04	-40	26.49	1.45	10.45	25.52	23.98	-3.22
YER178W	19	14.94	0.79	21.43	26.03	-18	21.43	40.62	60.89	38.7	41.7	42.67
YER183C	18	-8.56	-0.48	-3.91	-6.24	N/A	N/A	14.92	0.08	-2.77	-7.83	3.61
YER186C	57	-1.23	-0.02	3.79	10.37	-18	7.77	9.73	11.77	5.23	19.67	22.8
YFL001W	17	2.74	0.16	6.22	3.74	N/A	N/A	-2.58	-4.42	7.07	11.56	6.32
YFL004W	145	12.77	0.09	4.12	-16.41	-35	16.97	-20.41	8.55	16.48	5.31	9.27
YFL005W	163	16.7	0.1	31.23	-18.09	-159	33.03	22.09	17.89	-1.43	-10.05	13.24
YFL007W	131	7.58	0.06	7.95	-8.31	-56	15.64	1.47	12.02	16.43	11.33	5.79
YFL009W	180	4.21	0.02	1.74	2.95	-22	7.24	13.6	17.04	20.34	2.8	-3.77
YFL010C	16	-20.03	-1.25	-56.62	-56.62	N/A	N/A	-42.04	5.23	9.96	6.63	8
YFL014W	40	9.27	0.23	7.62	22.4	-18	23.17	9.04	-3.48	3.82	5.02	5.7
YFL016C	18	6.62	0.37	12.82	3.28	N/A	N/A	0.7	-2.45	13.71	20.87	9.59
YFL017C	23	-3.12	-0.14	-1.03	-3.17	-22	-1.03	0.87	5.41	10.61	-6.22	0.6
YFL017W-A	33	12.96	0.39	12.83	11.77	-30	14.46	-3.88	-10.06	-1.85	10.78	11.58
YFL018C	94	40.45	0.43	-1.14	0.2	-47	41.45	4.41	6.39	-6.16	-13.78	10.63
YFL022C	77	39.86	0.52	4.29	26.59	-24	36.58	2.47	-14.47	12.74	31.18	26.12
YFL028C	28	10.81	0.39	12.58	20.16	-19	20.76	3.24	-27.48	-23.28	0.26	6.57
YFL031W	69	48.54	0.7	22.4	-17.02	-33	34.36	-51.62	-7.65	56.34	52.76	22.12
YFL034C-A	32	7.9	0.25	6.65	17.6	-22	21.13	35.89	24.66	19.97	19.2	18.01
YFL037W	67	23.09	0.34	15.94	20.15	-18	29.59	33.22	42.33	25.4	33.42	21.81
YFL038C	53	-9.11	-0.17	3.86	-9.34	-52	3.86	-9.04	-13.3	-23.59	2.05	37.1
YFL039C	129	0.13	0	-32.62	-9.76	-38	28.31	29.28	66.84	51.1	36.08	32.41
YFL041W	14	0.79	0.06	-3.13	N/A	N/A	N/A	-6.4	-14.64	-26.03	-29.65	-15
YFL044C	22	5.41	0.25	-4.07	-4.76	-19	-3	-14.92	5.08	29.59	21.11	3.72
YFL045C	88	62.02	0.7	-24.78	25.82	-33	66.83	23.57	36.29	32.48	37.44	75.61
YFL046W	30	-20.52	-0.68	-22.02	-5.66	-18	-7.84	1.19	-0.92	-4.56	-5.99	6.85
YFL048C	18	3.84	0.21	-1.5	-3.33	N/A	N/A	-7.34	-1.99	28.07	30.02	8.85
YFR001W	44	14.97	0.34	3.81	27.25	-21	29.1	20.28	0.57	2.88	16.61	6.08
YFR002W	17	-22.56	-1.33	-15.58	-13.48	N/A	N/A	17.5	10.99	7.8	7.04	5.01
YFR003C	43	4.46	0.1	3.99	-9.56	-34	8.27	6.52	24.76	5.32	-13.48	-10.5
YFR004W	38	8.66	0.23	14.91	10.38	-37	14.91	8.01	1.95	15.34	17.33	5.61
YFR005C	48	2.52	0.05	1.31	2.38	-38	3.45	-0.41	-1.91	-0.95	7.68	5.19
YFR006W	182	-2.65	-0.01	0	-0.79	-23	0.28	0.14	4.41	5.62	3.35	4.42
YFR009W	62	-29.42	-0.47	-15.7	-4.22	-46	-1.33	-15.01	-21.75	4.73	9.03	12.09
YFR010W	84	6.36	0.08	2.74	1.57	-23	13.06	-8.75	-2.83	35.07	34.27	2.79
YFR014C	198	0.06	0	1.07	-2.6	-114	2.14	-0.05	-0.69	-0.69	0.88	3.91
YFR018C	64	14.46	0.23	3.35	0.21	-23	22.01	-17.82	5.89	17.77	24.62	21.32
YFR021W	89	12.54	0.14	7.85	3.81	-88	7.85	1.07	2.59	2.97	3.73	3.16
YFR024C-A	25	-8.62	-0.34	-4.13	4.81	-21	0.87	17.74	9.87	5.33	4.97	-13.83
YFR025C	29	11.8	0.41	12.87	21.26	-21	18.72	3.72	-2.73	10.96	13.84	12.21
YFR028C	34	-24.01	-0.71	-10.76	-32.69	-33	-10.76	-1.94	38.48	51.07	12.41	-4.42
YFR030W	56	16.46	0.29	4.55	9.98	-29	16.1	10.16	2.43	0.03	3.35	3.75
YFR031C-A	27	4.32	0.16	1.81	3.99	-19	14.26	-3.03	2.75	3.12	-11.6	-15.23
YFR032C-A	335	9.73	0.03	6.07	59.48	-18	61.3	101.79	37.17	-55.52	-67.62	-37.41
YFR033C	110	50.19	0.46	14.72	3.12	-94	24.21	-1.07	2.17	7.26	6.05	10.33
YFR034C	29	16.95	0.58	20.72	21.73	-24	24.63	1.16	-1.2	3.21	1.67	-0.42
YFR037C	27	-14.78	-0.55	-13.9	8.62	-18	13.36	26.53	19.26	-1.01	6.03	37.33
YFR039C	116	1.71	0.01	-0.93	4.21	-70	11.39	-2.04	6.32	7.56	0.78	7.81
YFR042W	38	-29.62	-0.78	-16.09	-16.23	-18	-15.02	8.89	5.39	6.85	11.18	12.06
YFR044C	20	21.52	1.08	37.84	34.93	-18	38.39	19.95	17.65	22.96	19.6	21.7
YFR045W	17	-4.61	-0.27	0.87	1.8	N/A	N/A	3.81	1.21	0.92	4.56	9.99
YFR047C	29	-13	-0.45	-13.93	-10.16	-18	-7.01	-3.92	-4.14	-1.97	-5.89	-2.32
YFR049W	161	10.54	0.07	-1.22	10.4	-100	13.09	10.6	12.37	1.51	-9.16	0.63
YFR050C	41	24.75	0.6	6.59	6.8	-34	20.22	21.84	49.51	29.68	-20.17	-6.12
YFR051C	43	1.21	0.03	15.89	-24.62	-42	15.89	-30.5	-6.59	31.69	24.51	14.38
YFR052W	33	-6.58	-0.2	-1.99	13.28	-18	7.72	31.72	15.57	-3.78	6.81	23.21
YFR053C	90	8.42	0.09	1.08	-1.39	-58	11.99	5.12	2.91	8.58	12.39	6.27
YGL001C	58	-6.4	-0.11	10.13	-7.66	-57	10.13	-1.79	9.86	30.31	17.35	-5.89
YGL002W	113	7.78	0.07	1.34	2.95	-23	12.24	26.31	15.2	0.99	-0.84	-2.81
YGL003C	84	11.34	0.14	4.28	9.76	-21	10.83	5.69	0.38	2.78	1.52	1.14
YGL006W	276	15.92	0.06	2.14	3.75	-215	5.77	4.49	1.95	5.7	5.56	2.14
YGL008C	238	165.93	0.7	-5.04	-0.38	-60	88.72	46.11	80.47	79.94	40.15	2.03
YGL009C	70	-0.88	-0.01	13.04	-7.17	-69	13.04	13.52	15.46	18.85	24.06	0.5
YGL010W	53	-17.39	-0.33	-15.15	0.69	-23	7.27	6.3	0.71	-6.04	-5.33	-0.15
YGL011C	18	4.27	0.24	9.71	6.77	N/A	N/A	1.06	9.69	25.12	20.09	14.45
YGL012W	27	21.26	0.79	25.22	9.81	-25	27.86	2.58	14.87	16.47	39.72	61.85
YGL014W	382	74.81	0.2	11.48	20.92	-35	25.87	4.09	8.34	14.45	10.08	9.5
YGL017W	36	-31.88	-0.89	-28.47	-26.98	-35	-28.47	0.22	5.88	-2.31	4.3	5.25
YGL019W	72	-15.67	-0.22	18.45	-6.21	-71	18.45	15.6	5.19	1.52	-3.14	15.59
YGL020C	53	-9.19	-0.17	0.36	4.24	-41	2.55	29.81	25.65	7.32	-2.08	-12.45
YGL022W	59	66.38	1.13	47.52	0.92	-58	47.52	18.85	18.54	20.82	28.75	16.47
YGL023C	32	0.25	0.01	0.25	3.04	-19	3.28	5.48	1.69	-0.6	12.78	12.94
YGL026C	32	47.15	1.47	43.57	43.46	-24	67.53	25.77	-2.65	-17.56	-0.64	14.31
YGL027C	50	16.1	0.32	0.77	14.86	-23	18.36	-3.36	2.37	13.95	23.49	22.1
YGL028C	162	59.49	0.37	18.9	6.63	-53	34.41	11.26	29.35	28.6	11.59	8.22
YGL030W	47	24.5	0.52	26.66	15.55	-46	26.66	13.07	-32.86	-6.87	22.57	20.77
YGL031C	491	-36.21	-0.07	-17.32	-37.72	-216	7.56	-9.6	10.03	28.55	16.46	6.65
YGL035C	117	-0.33	0	11.12	3.8	-111	18.59	7.26	14.82	21.63	5.2	3.57
YGL037C	56	-25.92	-0.46	2.48	-34.43	-52	4.62	-19.62	-7.16	2.14	-2.88	20.84
YGL038C	73	13.57	0.19	10.75	3.68	-72	10.75	-2.84	0.78	9.28	6.91	4.95
YGL039W	100	-16.14	-0.16	5.32	-6.16	-79	11.82	7.49	19.71	1.69	-8.44	-5.43
YGL040C	79	41.63	0.53	-0.75	16.7	-40	39.16	24.5	13.62	4.65	20.19	25.16
YGL043W	24	5.2	0.22	6.41	5.67	-19	8.28	3.07	4.45	-9.81	-11.25	0.62
YGL047W	51	9.95	0.2	3.62	5.18	-35	11.89	-2.81	-5.79	-14.18	-3.92	6.17
YGL048C	21	4.36	0.21	7.83	12.9	-18	10.25	27.98	13.47	-10.06	10.52	33.26
YGL054C	70	-4.81	-0.07	19.22	-41.35	-64	22.26	7.12	14.23	22.72	52.92	19.65
YGL055W	95	48.24	0.51	7.66	2.99	-64	51.86	-3.9	-22.32	0.53	5.44	32.46
YGL056C	48	22.04	0.46	14.57	13.64	-33	17.1	12.53	7.76	5.66	6.07	12.87
YGL058W	60	14.49	0.24	-1.23	25.42	-18	24.89	3.39	-28.65	-4.57	14.99	35.45
YGL062W	236	24.69	0.1	11.52	6.17	-151	12.29	8.49	5.57	-5.01	-7.8	4.31
YGL067W	118	7.58	0.06	0	0.16	-50	13.93	2.79	9.52	7.44	-5.51	-5.41
YGL068W	49	-14.45	-0.29	13.39	-24.17	-48	13.39	16.93	28.59	-11.94	-12.6	24.09
YGL070C	23	17.34	0.75	27.02	23.44	-19	29.99	9.74	1.46	-1.86	1.21	9.45
YGL076C	25	1.83	0.07	15.88	-6.7	-21	19.74	-12.64	5.24	-34.4	-27.03	27.8
YGL077C	45	-6.01	-0.13	2.78	-17.7	-38	22.65	8.7	20.17	15.75	19.02	11.79
YGL078C	78	4.59	0.06	1.72	-2.51	-68	7.22	-0.08	2.57	0	0.14	2.28
YGL079W	52	-1.06	-0.02	0.74	-8.18	-46	8.44	-2.02	-5.23	-0.82	0.24	6.06
YGL080W	63	5.72	0.09	-0.79	4.89	-32	6.51	5.32	9.34	-1.88	-7.08	9.15
YGL082W	80	8.72	0.11	3.72	-10.43	-44	12.98	2.38	2.93	3.76	6.56	4.86
YGL084C	66	-12.8	-0.19	-16.32	24.96	-18	15.67	40.86	16.09	-11.31	-3.71	13.96
YGL087C	49	1.06	0.02	-1.22	-2.55	-39	1.99	-4.56	-2.68	-10.35	4.93	19.83
YGL091C	53	29.25	0.55	10.65	8.31	-32	24.27	6.19	23.03	10.37	16.73	26.83
YGL092W	76	1.46	0.02	4.33	-0.54	-68	5.4	-0.14	-11.11	-8.34	17.07	24.91
YGL097W	59	-5.64	-0.1	-5.36	10.7	-20	13.07	27.03	23.4	9.85	-6.87	3.88
YGL099W	41	5.64	0.14	-0.27	10.4	-20	13.26	9.58	8.63	7.96	1.99	-4.35
YGL100W	23	9.96	0.43	19.77	-8.23	-22	19.77	-1.34	15.52	6.23	-4.06	0.55
YGL101W	104	-16.54	-0.16	-2.83	1.31	-54	2.44	11.73	-1.4	-7.68	-1.97	4.93
YGL103W	19	-15.89	-0.84	8.86	13.89	-18	8.86	8.58	11.91	49.54	35.02	13.29
YGL105W	44	5.68	0.13	-5.69	16.36	-18	11.63	22.68	10.85	1.01	21.98	47.48
YGL106W	20	6.3	0.32	24.57	16.92	-19	24.57	10.4	27.33	51.36	29.12	-4.03
YGL111W	20	10.93	0.55	13.59	16.43	-19	13.59	12.96	4.05	-1.06	12.29	19.34
YGL112C	28	-5.82	-0.21	-19.83	-20.48	-27	-19.83	-1.41	13.57	10.43	12.75	16.64
YGL114W	74	3.54	0.05	4.05	8.26	-18	9.94	14.27	17.33	24.67	5.44	4.42
YGL115W	123	21.38	0.17	-1.66	40.9	-21	38.72	11.35	10.24	18.66	8.4	0.77
YGL120C	55	9.47	0.17	1.41	30.59	-18	34.99	8.22	7.38	27.75	25.64	14.05
YGL122C	16	-6.95	-0.43	-2.61	-2.61	N/A	N/A	0.36	7.23	3.89	-5.79	0.6
YGL123W	100	40.01	0.4	36.92	-6.97	-97	36.99	24.97	59.88	65.15	38.43	52.8
YGL126W	51	10.53	0.21	16.76	12.91	-39	22.08	16.03	13.72	0.79	-13.3	4.3
YGL127C	19	16.52	0.87	28.58	29.09	-18	28.58	16.51	17.76	12	-0.44	17.04
YGL135W	66	59.54	0.9	39.4	13.17	-60	60.78	16.42	22.05	11.75	10.64	37.92
YGL137W	21	-26.93	-1.28	-25.36	-23.6	-18	-17.86	-6.9	4.17	10.75	-10.88	-12.98
YGL139W	86	51.22	0.6	41.06	13.15	-80	45.21	7.07	3.81	-8.8	-9.3	11.33
YGL140C	47	1.62	0.03	0.53	-7.37	-42	4.89	-9.02	1.58	3.64	15.67	16.23
YGL142C	48	20.88	0.44	3.82	32.21	-18	25.88	21.26	6.57	3.67	9.68	17.69
YGL147C	19	15.19	0.8	-2.1	0.65	-18	-2.1	-10.03	6.46	8.16	34.14	30.75
YGL148W	30	-18.77	-0.63	-14.18	24.94	-18	19.43	56.98	40.94	7.99	16.92	39.24
YGL155W	127	1.57	0.01	-2.2	-4.78	-55	15.18	1.12	8.51	14.53	5.32	7.74
YGL157W	44	-1.4	-0.03	7.76	-23.3	-43	7.76	-17.87	7.36	19.27	-4.37	-12.04
YGL160W	90	18.68	0.21	-2.71	-6.09	-57	23.25	0.88	18.01	14.64	-6.48	-2.27
YGL161C	96	-13.14	-0.14	-35.05	21.68	-22	40.7	11.4	16.68	12.71	-7.69	18.1
YGL166W	23	6.53	0.28	13.04	10.59	-20	13.97	-9.94	-59.02	-43.73	0.03	2.2
YGL167C	130	67.13	0.52	20.41	21.13	-46	28.97	19.7	-1.51	0.86	10.24	12.35
YGL169W	91	3.23	0.04	2.74	10.11	-18	14.12	16.55	4.72	-1.47	-1.92	-3.52
YGL172W	25	1.29	0.05	5.1	5.1	-23	7	6.97	20.41	16.26	7.7	5.62
YGL173C	334	82.55	0.25	-2.24	26.76	-23	29.93	15.37	2.64	-4.32	-8.23	-3.17
YGL181W	55	-0.26	0	8.66	-4.52	-48	10.16	-1.45	7.29	7.79	4	-1.08
YGL186C	64	17.77	0.28	5.07	16.07	-28	14.21	37.49	39.06	28.28	11.46	-5.46
YGL187C	485	19.66	0.04	-17.45	8.93	-427	27.53	7.4	23.02	16.05	-25.63	-29.52
YGL189C	398	17.12	0.04	2.14	1.77	-255	19.9	16.31	33.34	32.95	35.05	52.27
YGL191W	63	-13.86	-0.22	11.58	0.13	-61	12.74	21.99	19.77	8.32	15.84	34.63
YGL194C-A	50	-7.99	-0.16	10.53	-13.25	-49	10.53	-0.88	-2.29	-10.71	-10.57	0.8
YGL195W	31	18.76	0.61	18.76	-4.06	-30	18.76	-8.68	-7.53	6.51	11.56	10.8
YGL196W	63	7.41	0.12	1.55	4.7	-23	8.88	16.09	9.72	6.52	6.77	1.69
YGL200C	50	27.28	0.55	37.07	-2.33	-48	37.35	9.83	26.45	49.82	33.8	16.68
YGL202W	120	72.67	0.61	17.54	-5.27	-47	78.8	20.81	10.03	3.63	14.35	33.49
YGL206C	57	11.23	0.2	5.62	22.2	-24	16.77	12.84	3.95	-4.76	-0.78	17.08
YGL207W	95	17.82	0.19	1.76	7.62	-60	12.8	10.15	5.66	10.86	12.08	4.92
YGL210W	25	12.61	0.5	1.15	5.09	-18	4.26	-4.16	-5.75	5.44	13.59	-5.38
YGL211W	36	14.63	0.41	10.86	-1.3	-34	12.96	5.17	9.52	1.58	-2.45	-6.37
YGL213C	22	9.51	0.43	4.09	5.49	-21	4.09	4.44	11.49	10.63	8.89	9.49
YGL215W	465	87.81	0.19	3.21	20.81	-36	36.76	21.2	24.65	13.8	16.6	21.82
YGL221C	341	11.27	0.03	0	10.22	-18	8.66	7.6	14.54	15.88	34.69	25.26
YGL223C	4	1.07	0.27	10.11	N/A	N/A	N/A	9.04	22.19	4.42	-3.29	5.35
YGL224C	161	10.08	0.06	1.07	7.32	-62	16.82	18.69	22.71	18.33	13.6	17.45
YGL225W	43	36.27	0.84	13.63	3.98	-29	43.91	-9.73	17.36	20.26	35.46	20.76
YGL226C-A	43	34.68	0.81	21	29.73	-24	38.11	8.66	9.34	35.61	30.83	0.16
YGL228W	42	-0.86	-0.02	3.79	5.51	-35	6.91	20.4	17	11.36	-1.21	-1.11
YGL231C	19	10.05	0.53	21.42	27.67	-18	21.42	18.84	-1.38	8.93	14.73	-0.89
YGL234W	57	24.61	0.43	2.79	42.23	-18	33.54	13.44	-6.6	7.89	39.87	38.81
YGL242C	44	-12.17	-0.28	-15.8	3.51	-21	13.34	-6.65	-17.45	-21.2	7.15	22.74
YGL245W	20	-24.84	-1.24	-19.35	-4.1	-18	-11.78	42.34	54.8	53.66	23.58	27.63
YGL246C	57	-2.45	-0.04	-3.44	5.62	-20	6.35	-0.79	-5.19	10.21	24.17	8.98
YGL248W	47	-2.25	-0.05	-2.1	4.23	-18	3.25	3.02	-12.6	-6.48	5.47	-7.28
YGL252C	25	1.74	0.07	2.48	7.82	-18	9.65	12.1	5.04	-8.48	-12.96	-1.97
YGL253W	35	0.77	0.02	9.84	3.77	-34	9.84	34.99	52.5	55.32	28.8	5.34
YGL254W	33	-3.05	-0.09	-3.05	-2.65	-21	-0.32	-1.48	1.01	9.84	1.9	-11.29
YGL255W	39	-10.61	-0.27	-7.55	-5.14	-19	0.33	0.24	-6.81	12.14	6.88	-17.83
YGL256W	268	52.2	0.19	11.53	6.98	-76	26.55	18.38	10.45	2.6	10.26	10.1
YGL257C	90	4.16	0.05	0.28	-5.32	-60	6.25	-4.02	7.02	-14.55	-15.88	7.78
YGR001C	10	-7.19	-0.72	2.41	N/A	N/A	N/A	16.03	17.98	20.13	9.62	1.56
YGR004W	53	5.73	0.11	6.16	-1.23	-51	7.23	0.72	11.12	15.07	0.31	-6.39
YGR007W	41	13.17	0.32	6.82	-4.01	-25	14.1	-17.29	-6.36	12.2	14.25	6.25
YGR008C	73	-0.03	0	3.41	-10.43	-41	11.54	5.48	10.61	7.87	15.89	22.18
YGR012W	140	-1.52	-0.01	-1.86	-1.95	-48	5.44	7.15	12.48	10.27	-2.64	0.16
YGR014W	9	8.66	0.96	19.01	N/A	N/A	N/A	12.99	1.74	7.62	27.91	19.86
YGR017W	149	26.29	0.18	4.66	-0.26	-26	25.13	7.16	19.12	15.03	6.31	10.86
YGR019W	124	3.7	0.03	-2.79	3.2	-52	4.55	0.09	12.79	11.08	-15.15	-15.8
YGR020C	54	23.31	0.43	0.37	16.62	-24	51.74	19.44	18.48	7.72	25.59	31.88
YGR024C	33	-8.3	-0.25	-6.53	-9.73	-32	-6.53	1	4.21	16.42	-0.36	-11.98
YGR027C	367	16.92	0.05	-6.59	8.98	-39	12.75	22.51	33.78	23.59	-4.15	-2.67
YGR028W	15	-32.68	-2.18	-18.13	N/A	N/A	N/A	17.94	12.3	10.44	5.06	8.84
YGR031W	146	22.46	0.15	1.07	10.78	-53	15.56	-2.62	7.14	2.57	-11.92	-6.73
YGR033C	87	-22.86	-0.26	-5.85	-20.03	-47	3.07	8.52	42.16	39.34	7.4	7.11
YGR034W	30	-17.59	-0.59	-16.91	4.74	-18	4.75	42.69	30.86	12.26	-0.6	13.9
YGR037C	41	-3.4	-0.08	-19.93	43.44	-18	35.17	19.31	-5.53	2.65	20.69	44.74
YGR038W	140	17.51	0.13	3.3	-8.72	-95	14.62	13.4	21.75	7.93	0.55	27.6
YGR040W	49	-1.42	-0.03	0.14	3.97	-23	5.97	4.46	0.74	-2.33	5.55	14.22
YGR046W	147	-8.92	-0.06	-1.93	-4.34	-66	6.19	7.14	-0.03	8.21	10.19	-1.22
YGR048W	52	-1.75	-0.03	-1.56	0.28	-48	1.04	2.55	0.41	6.71	12.06	9.25
YGR054W	148	30.79	0.21	-17.01	12.52	-93	26.41	3.23	2.05	20.16	45.77	37.27
YGR055W	35	1.85	0.05	1.42	-14.8	-30	9.28	-4.56	13.44	5.8	5.28	-5.95
YGR060W	73	16.25	0.22	10.82	7.09	-52	26.82	36.35	27.6	35.2	32.32	49.24
YGR061C	125	8.83	0.07	3.38	-3.11	-36	15.51	16.6	28.76	28.72	-6.14	-17.68
YGR065C	126	0.62	0	5.06	14.38	-21	18.59	7.33	11.55	10.53	3.08	12.31
YGR077C	19	13.18	0.69	19.08	18.17	-18	19.08	19.9	14.66	-6.36	2.95	0.5
YGR078C	30	-5.01	-0.17	-5.01	-13.31	-27	-4.74	14.39	6.44	9.53	8.28	-8.14
YGR080W	7	-1.12	-0.16	24.47	N/A	N/A	N/A	33.99	23.67	7.19	9.78	5.56
YGR081C	19	7.25	0.38	8.49	7.01	-18	8.49	-3.44	-1.37	2.27	13.06	6.73
YGR082W	49	7.35	0.15	8.22	6.68	-43	15.31	44.85	20.13	-4.39	13.2	15.29
YGR085C	28	-8.11	-0.29	-11.62	4.14	-18	0.47	8.89	11.01	18.63	20.86	7.69
YGR086C	110	77.08	0.7	19.26	14.92	-92	50.47	28.99	47.89	68.69	67.49	36.78
YGR090W	167	18.2	0.11	8	16.79	-27	19.21	1.28	8.54	24.03	21.08	12.68
YGR094W	83	2.8	0.03	0	-3.83	-55	3.81	0.22	4.93	7.82	4.67	13.56
YGR095C	40	-6.8	-0.17	0	-4.56	-39	0	5.64	7.89	8.58	-4.74	-10.07
YGR099W	42	12.95	0.31	16.55	-13.26	-36	20.58	-7.99	2.7	0.41	1.95	-11.63
YGR101W	59	-5.73	-0.1	8.64	-10	-58	8.64	-9.22	-1.51	-0.51	1.53	16.95
YGR102C	4	3.17	0.79	3.29	N/A	N/A	N/A	-1.57	-20.8	-19.99	1.07	5.35
YGR103W	20	7.63	0.38	12.01	10.81	-19	12.01	21.12	27.13	16.67	-7.77	-6.5
YGR105W	61	16.62	0.27	8.53	24.4	-21	24.49	42.51	5.61	-14	7.87	30.96
YGR106C	47	13.36	0.28	7.72	31.65	-18	30.66	27.49	21.91	36.89	53.96	61.05
YGR108W	117	25.76	0.22	14.3	3.61	-116	14.3	1	-5.42	-15.61	-18.8	-7.32
YGR111W	39	0.35	0.01	1.01	11.06	-20	10.46	4.56	4.52	22.41	17.9	1.53
YGR116W	54	-13.77	-0.26	-14.98	0.28	-32	2.28	2.41	4.22	6.46	7.99	8.96
YGR117C	169	-4.4	-0.03	0	0.36	-37	0.26	13.1	7.7	9.98	-11.73	-7.89
YGR118W	25	-36.78	-1.47	-41.62	-8.2	-18	-10.62	35.54	16.87	10.5	10.02	2.31
YGR119C	69	5.32	0.08	13.26	-3.39	-67	14.93	-1.36	3.17	7.11	4.6	-6.57
YGR123C	34	12.93	0.38	9.12	20.94	-18	19.27	35.67	23.81	1.17	-4.65	-3.77
YGR124W	18	-15.37	-0.85	-7.74	-6.08	N/A	N/A	37.37	28.65	9.74	2.78	31.57
YGR125W	6	0	0	-4.03	N/A	N/A	N/A	-5.09	-2.79	-0.65	1.43	3.44
YGR128C	19	5.02	0.26	11.87	9.78	-18	11.87	6.9	0	2.93	-2.53	4.22
YGR132C	50	-16.22	-0.32	15.87	-17	-46	21.79	23.18	-11.56	-13.89	11.37	3.29
YGR133W	62	0	0	0	0	-61	0	-1.5	0.28	5.7	-0.16	0.98
YGR135W	62	10.83	0.17	5.55	32.65	-19	37.94	25.12	12.26	9.44	30.42	60.06
YGR141W	47	2.11	0.04	1.29	4.63	-27	11.65	4.88	8.66	12.08	10.69	12.24
YGR143W	163	29.63	0.18	1.03	20.63	-72	24.58	7	0.65	-1.87	-3.98	9.08
YGR147C	56	-6.05	-0.11	-6.19	-6.13	-34	0.14	-5.72	13.2	15.96	8.91	27.21
YGR148C	421	-5.47	-0.01	1.67	-52.68	-222	17.85	-7.6	36.02	22.55	-13.92	7.34
YGR149W	169	-7.42	-0.04	-9.3	-7.66	-53	8.61	-9.09	-0.98	-0.71	2.82	12.78
YGR152C	112	-4.01	-0.04	-4.31	3.55	-52	8.52	-1.58	3.05	10.67	7.04	14.01
YGR155W	25	-7.48	-0.3	-1.16	-19.92	-24	-1.16	-6.28	22.98	15.57	37.65	21.39
YGR157W	216	87.99	0.41	-2.48	7.97	-128	38.56	12.79	10.84	4.57	13.2	35.84
YGR158C	55	13.34	0.24	7.76	7.69	-35	13.2	2.3	12.67	20.49	22.21	21.84
YGR162W	51	-17.73	-0.35	-17.37	12.9	-21	12.73	52.09	65.12	11.96	-0.53	33.92
YGR165W	58	1.73	0.03	-1.76	5.27	-40	6.01	0.48	-2.43	9.63	20.31	0.48
YGR167W	53	6.82	0.13	7.55	9.08	-42	24.02	33	21.92	13.02	10.42	-3.23
YGR172C	33	2.73	0.08	5.16	3.03	-22	6.19	7.86	0.56	0.34	13.11	32.37
YGR173W	45	-19.82	-0.44	-13.73	-10.53	-42	-11	15.02	13.22	-1.9	-4.7	-2.75
YGR175C	65	-26.41	-0.41	7.59	-30.47	-64	7.59	17.14	53.28	62.82	19.48	7.05
YGR178C	216	31.07	0.14	9.48	3.75	-152	25.9	22.1	6.58	-0.46	0.66	12.11
YGR180C	195	55.36	0.28	-0.62	0.5	-54	33.09	-4.86	3.29	34.37	43.94	20.86
YGR181W	54	-6.22	-0.12	-0.95	4.81	-41	8.01	23.89	7.72	0.67	-10.34	-4.87
YGR183C	80	19.86	0.25	5.6	3.68	-59	28.36	-11.52	-33.45	-22.23	5.92	18.57
YGR185C	34	9.25	0.27	9.17	18.7	-24	22.12	26.27	19.46	24.99	56.59	45.68
YGR189C	72	-24.53	-0.34	-3.46	-17.54	-46	7.29	-11.34	-7.06	22.74	43.72	16.31
YGR191W	140	-2.67	-0.02	6.07	7.11	-74	16.5	-7.6	-10.73	-4.14	-2.08	16.26
YGR192C	42	-21.2	-0.5	-7.92	7.57	-41	-7.92	64.49	65.67	54.26	43.25	30.01
YGR193C	94	-32.47	-0.35	5.61	-25.46	-92	6.68	10.08	14.16	1.54	-27.67	-27.59
YGR195W	105	45.9	0.44	6.32	29.9	-19	31.26	6.96	6.44	11.4	-5.82	1.83
YGR197C	32	-0.9	-0.03	-0.9	8.05	-27	9.72	1.45	4.62	4.38	-3.19	-0.16
YGR200C	62	30.81	0.5	20.22	1.37	-53	28.12	-4.71	16.47	9.06	14.42	-0.76
YGR201C	82	-7.02	-0.09	-1.36	-4.69	-41	2.74	2.09	5.02	10.1	-3.13	16.39
YGR202C	131	1.16	0.01	0	9.45	-18	13.43	6.46	17.09	13.43	0	-1.86
YGR203W	325	-2.39	-0.01	-1.5	14.57	-20	7.23	6.09	5.14	10.64	12.45	15.44
YGR204W	34	-4.15	-0.12	-0.82	1.7	-19	3.66	40.69	28.52	2.75	-27.43	-17.45
YGR206W	35	0.41	0.01	1.34	-2.23	-34	1.34	3.3	12.77	3.93	-7.82	-2.43
YGR207C	27	2.23	0.08	5.15	0.48	-21	5.29	1.85	15.49	22.49	14.56	4.32
YGR208W	43	18.88	0.44	22.38	-7.46	-42	22.38	18.15	16.38	-2.72	18.59	20.95
YGR209C	38	12.41	0.33	5.52	20.18	-19	22.88	32.4	26.67	28.05	-29.43	-28.96
YGR210C	112	9.88	0.09	1.99	19.8	-80	20.25	22.61	0.5	16.46	5.22	-16.41
YGR211W	59	16.78	0.28	7.16	13.6	-19	18.6	-5.57	-5.11	23.06	33.47	7.15
YGR214W	22	-24.97	-1.14	-32.65	-30.81	-19	-28.42	1.05	5.6	5.05	18.44	7.69
YGR216C	15	3.92	0.26	7.67	N/A	N/A	N/A	11.73	-15.18	-25.23	-3.3	3.76
YGR218W	291	0.61	0	0.71	5.94	-172	12.81	17.48	21.51	1.61	5.19	39.24
YGR220C	67	0.65	0.01	0	51.07	-18	35.56	37.78	-15.48	-9.2	9.2	5.83
YGR222W	25	-4.84	-0.19	-7.8	-1.9	-18	-2.83	3.86	-0.53	2.7	6.18	6.34
YGR227W	96	23.74	0.25	1.55	2.26	-48	26.44	1.66	0.78	9.56	15.96	9.95
YGR229C	261	54.72	0.21	11.7	5.72	-78	18.57	3.85	11.96	24.97	28.85	28.4
YGR230W	75	-1.62	-0.02	1.07	1.5	-74	1.07	8.94	4.65	-3.94	-0.87	12.09
YGR231C	23	-6.95	-0.3	2.28	22.57	-18	15.01	31.73	12.11	-0.21	17.15	16.17
YGR232W	10	3.81	0.38	7.43	N/A	N/A	N/A	4.77	7.02	10.69	5.26	-18.09
YGR233C	96	18.73	0.2	0.48	7.75	-34	11.69	9.59	10.62	6.92	6.03	-1.31
YGR234W	22	12.75	0.58	35.42	27.13	-18	39.93	47.77	53.94	24.1	45.41	53.86
YGR235C	49	-16.14	-0.33	-24.94	1.97	-25	2.2	-4.41	-1.03	-5.07	1.97	-8.09
YGR239C	138	1.66	0.01	-0.93	3.21	-87	4.88	3.81	-6.26	-5.56	2.65	-0.13
YGR240C	225	27.87	0.12	11.34	4.86	-202	33.21	40.21	37.76	18.46	10.32	38.23
YGR244C	99	13.68	0.14	0.05	11.12	-19	14.54	12.87	-0.6	-24.71	-16.41	-11.61
YGR245C	107	30.44	0.28	3.95	1.12	-42	29.06	11.19	6.01	0.51	9.02	7.86
YGR247W	84	-4.55	-0.05	-10.06	4.59	-22	10.83	16.97	14.67	6.1	2.59	9.6
YGR253C	46	-24.04	-0.52	5.96	-19.65	-45	5.96	7.36	0.24	-6.71	-1.64	20.02
YGR254W	40	42.43	1.06	57.35	14.28	-37	59.46	21.76	52.42	49.91	-1.7	-13.84
YGR255C	71	14.08	0.2	9.29	8.92	-26	15.01	7.62	4.28	-6.36	0.74	10.91
YGR257C	96	35.18	0.37	24.59	-2.53	-79	34.27	4.82	8.22	7.64	4.64	-0.14
YGR261C	38	-11.95	-0.31	-17.48	21.82	-18	17.48	1.78	-5.63	3.13	1.81	2.03
YGR262C	26	-0.87	-0.03	-3.63	6.51	-21	4.64	6.31	13.48	22.97	1.04	-10.22
YGR264C	54	-28.47	-0.53	3.39	-12.02	-53	3.39	-4.65	-6.16	25.03	33.06	26.84
YGR266W	69	-7.33	-0.11	-3.21	1.18	-52	4.46	16.8	19.07	9.7	5.38	8.44
YGR267C	214	79.9	0.37	-1.97	21.64	-142	33.99	-10.03	-8.31	0.08	18.32	25.56
YGR277C	20	-7.61	-0.38	-7.8	-8.73	-19	-7.8	2.3	11.27	11.56	2.68	-2.92
YGR279C	82	60.04	0.73	16.24	23.45	-54	55.99	49.31	54.75	69.98	61.46	52.58
YGR281W	229	20.99	0.09	4.47	9.94	-37	13.46	13.77	8.96	14.49	20.62	17.59
YGR282C	24	-4.8	-0.2	5.73	4.86	-22	9.27	33.51	46.87	30.94	-2.81	-0.82
YGR283C	26	-0.67	-0.03	0.4	2.4	-20	3.33	0.66	-0.28	3.75	-2.53	-6.3
YGR284C	43	-7.47	-0.17	-15.14	7.4	-21	8.41	14.51	18.99	35.15	41.39	43.34
YGR285C	15	-5.51	-0.37	-2.18	N/A	N/A	N/A	29.53	16.62	28.5	53.91	19.33
YGR286C	270	10.9	0.04	4.69	4.11	-18	9.52	3.9	9.45	-12.52	-23.47	-10.74
YHL001W	18	-41.22	-2.29	-41.73	-38.14	N/A	N/A	9.18	31.31	33.7	23.63	13.82
YHL003C	124	18.79	0.15	-7.37	20.48	-105	39.31	1.78	-14.75	-35.45	-34.85	-21.98
YHL004W	82	27.76	0.34	11.36	1.56	-42	21.02	3.36	-0.96	-1.33	2.05	11.31
YHL011C	95	41.11	0.43	5.04	-7.91	-46	34.02	18.97	61.61	63.22	10.41	9.54
YHL015W	26	-15.89	-0.61	-6.95	44.37	-18	36.62	55.89	20.5	12.71	17.35	70.63
YHL017W	76	-11.1	-0.15	5.95	-0.45	-66	7.62	10.12	2.54	-10.54	3.16	18.47
YHL020C	76	-21.25	-0.28	-8.86	0.71	-18	1.64	-0.24	1.34	3.36	-3.07	10.32
YHL021C	39	-12.86	-0.33	-1.01	-25.25	-38	-1.01	-6.97	5.13	0.11	-3.15	4.53
YHL025W	49	1.06	0.02	-1.08	2.14	-31	3.35	-8.02	-6.32	5.78	-2.62	-2.93
YHL027W	132	5.09	0.04	0.14	4.53	-58	8.37	-4.41	3.05	10.89	10.4	11.38
YHL032C	5	-0.93	-0.19	5.91	N/A	N/A	N/A	6.98	18.96	19.81	15.75	-2.09
YHL033C	10	12.47	1.25	5.63	N/A	N/A	N/A	5.05	24.04	21.95	39.18	33.72
YHL034C	113	12.18	0.11	-2.07	27.43	-20	50.41	-0.33	-3.06	36.75	41.29	10.91
YHR001W	322	-23.25	-0.07	0	-22.85	-64	2.24	0.75	4.05	8.05	13.06	11.36
YHR001W-A	69	6.74	0.1	10.49	19.7	-65	13	28.32	12.29	4.34	2.21	6.81
YHR003C	63	3.69	0.06	0	-0.33	-34	6.12	1.83	1.49	-0.18	13.97	-4.28
YHR005C	85	10.03	0.12	-5.65	2	-53	16.06	23.21	23.49	16.23	17.34	2.67
YHR005C-A	37	-23.19	-0.63	-10.88	7.6	-19	10.35	31.48	30.94	20.47	2.52	17.58
YHR007C	131	72.82	0.56	16.87	35.46	-62	43.3	29.61	6.24	22.41	23.36	32.09
YHR008C	84	19.26	0.23	14.05	0.17	-72	24.84	14.68	14.7	25.76	18.55	7.28
YHR009C	78	-4.1	-0.05	-2.55	2.52	-20	5.06	14.72	30.31	2.6	6.14	28.26
YHR010W	25	-34.58	-1.38	-42.81	-33.55	-18	-39.36	25.97	30.7	6.99	-16.34	-11.86
YHR012W	156	-10.53	-0.07	0	4.54	-51	3.81	2.73	5.64	17.33	8.65	4.41
YHR013C	44	-2.19	-0.05	-3.62	-3.21	-35	4.93	-9.22	-2.96	10.01	6.13	4.24
YHR016C	48	-2.82	-0.06	-4.38	14.44	-18	14.2	11.88	8.36	-5.99	-18.9	-4.59
YHR017W	28	-3.36	-0.12	-4.72	-1.38	-23	-1.38	9.95	19.15	12.25	-3.75	-3.48
YHR018C	42	17.69	0.42	6.9	37.8	-18	26.34	1.99	-20.25	-6.8	-7.8	14.59
YHR019C	44	21.98	0.5	11.18	33.1	-18	33.39	21.99	-10.22	1.63	30.96	44.69
YHR020W	109	44.97	0.41	-0.47	6.16	-80	33.49	14.63	-13.2	-6.99	19.05	-5.8
YHR021C	42	-9.87	-0.24	-7.24	2.31	-37	14.12	9.62	-15.07	5.67	11.87	-19.53
YHR024C	16	-16.72	-1.04	-18.62	-18.62	N/A	N/A	5.75	9.15	-4.6	-4.72	-23.22
YHR025W	28	7.23	0.26	8.47	17.7	-21	16.71	23.29	31.67	49.18	41.82	25.05
YHR026W	120	99	0.83	28.21	53.28	-19	53.29	-4.23	-24.04	27.79	48.1	27.67
YHR027C	49	20.04	0.41	8.73	28.75	-18	24.8	11.3	-7.75	3.84	10.71	3.17
YHR030C	81	25.08	0.31	19.79	0.41	-80	19.79	6.92	13.6	13.3	5.37	0.33
YHR034C	16	-3.16	-0.2	-1.06	-1.06	N/A	N/A	5.14	11.03	-14.24	-15.04	-1.2
YHR039C	87	4.1	0.05	5.18	9.91	-18	15.6	-31.27	-25.86	4.1	12.74	35.01
YHR039C-A	17	-1.26	-0.07	7.85	11.87	N/A	N/A	51.8	73.76	47.7	6.85	-45.68
YHR041C	154	-1.3	-0.01	0	23.32	-18	16.02	35.36	40.19	-9.88	-25.75	38.68
YHR042W	33	25.22	0.76	23.09	15	-22	31.04	-37.69	-26.4	24.79	58.44	72.11
YHR043C	102	-14.28	-0.14	-3.36	-20.95	-69	17.21	9.13	-0.92	13.58	17.97	11.1
YHR045W	143	6.96	0.05	5.34	2.33	-76	13.15	-6.26	-22.66	-9.1	12.65	1.54
YHR046C	76	-18.92	-0.25	-19.99	3.98	-21	9.34	-0.16	9.52	1.42	-2.44	10.05
YHR047C	51	19.08	0.37	10.35	17.02	-19	16.32	16.95	12.92	0.87	7.79	16.66
YHR049W	30	-20.11	-0.67	-17.68	-24.53	-24	-2.5	-11.65	2.55	8.78	12.86	10.88
YHR051W	52	8.8	0.17	17	0.32	-47	17.53	15.51	2.19	-5.36	0.8	0.53
YHR052W	28	4.27	0.15	7.19	-6.42	-27	7.19	13.71	10.3	2.88	-5.01	-9.23
YHR055C	53	46.99	0.89	39.18	11.18	-36	47.05	49.23	90.48	84.34	46.84	-13.11
YHR057C	48	0.59	0.01	0.14	-5.67	-44	2.88	2	18.84	16.68	-4.1	-20.09
YHR058C	37	-1.17	-0.03	-0.38	0.96	-33	0.69	-6.74	-9.19	-1.6	3.02	7.2
YHR061C	197	4.69	0.02	1.21	-0.93	-101	3.21	-6.73	-4.52	-4.03	-6	2.43
YHR062C	45	-11.11	-0.25	-13.24	3	-20	6.8	8.57	5.44	10.65	28.08	-1.5
YHR063C	19	1.12	0.06	3.93	3.6	-18	3.93	3.45	5.85	4.76	5.04	14.39
YHR064C	32	-8.29	-0.26	-3.32	-53.54	-31	-3.32	25.99	54.03	55.54	2.02	3.53
YHR065C	29	-2.16	-0.07	-2.16	-0.43	-22	0.77	2.4	-5.91	-8.22	1.12	2.35
YHR066W	34	1.07	0.03	0	1.48	-32	1.07	-1.87	8.08	21.5	16.66	7
YHR067W	23	-2.75	-0.12	0.22	-11.01	-22	0.22	-4.75	14.09	0.47	-16.33	-3.18
YHR068W	75	7.46	0.1	11.95	4.11	-62	19.33	17.89	33.76	43.74	35.02	29.66
YHR069C	8	-4.32	-0.54	4.02	N/A	N/A	N/A	17.79	45.47	47.52	3	-16.85
YHR071W	61	56.23	0.92	58.5	-7.16	-60	58.5	-2.47	0.8	-3.22	9.98	11.04
YHR072W	84	13.24	0.16	3.46	5.95	-24	17.65	30.08	27.55	19.93	45.63	51.6
YHR072W-A	60	-118.71	-1.98	-83.15	0.88	-18	-13.93	40.72	29.56	8.72	-28.58	-5.69
YHR073W	81	21.09	0.26	9.61	11.14	-34	11.34	-3.56	-1.35	0.16	-5.48	4
YHR074W	25	-1.19	-0.05	3.48	14.95	-19	10.32	16.52	-10.83	-5.29	3.89	0.17
YHR076W	28	-1.86	-0.07	-1.86	-0.12	-25	-0.66	-1.54	-5.71	0.69	3.45	1.09
YHR078W	40	18.75	0.47	11.88	11.86	-19	17.45	-14.28	-11.29	0.1	6.28	-6.93
YHR083W	10	1.43	0.14	14.46	N/A	N/A	N/A	30.65	24.52	3.29	15.13	38.32
YHR086W	207	38.1	0.18	-1.34	15.77	-22	22.37	13.72	-1.22	-0.49	15.34	4.41
YHR087W	69	2.96	0.04	2.28	-2.51	-45	8.63	-11.89	-28.49	-7.81	-2.28	-3.73
YHR088W	31	-4.42	-0.14	-4.42	9.61	-18	8.41	19.29	7.8	2.92	2.14	3.17
YHR089C	55	0.72	0.01	8.71	-9.49	-53	11.19	23.63	34.88	31.75	22.79	0.48
YHR092C	76	-34.03	-0.45	-12.08	1.97	-23	1.97	-7.12	-5.34	21.14	27.83	15.16
YHR094C	55	-11.36	-0.21	6.34	-12.23	-38	13.76	15.51	29.65	3.19	2.04	29.67
YHR098C	76	32.55	0.43	10	11.76	-38	26.53	20.45	18.6	5.05	8.21	10.37
YHR103W	82	10.89	0.13	4.51	15.79	-19	13.46	6.55	0.13	-5.45	9.13	27.86
YHR104W	90	-2.56	-0.03	6.18	-2.37	-74	16.74	6	3.63	2.6	-3.18	23.31
YHR106W	145	-14.4	-0.1	-8.27	-10.84	-109	6.96	-1.69	7.7	11.19	17.41	12.65
YHR107C	50	16.82	0.34	11.63	0.3	-47	14.66	4.56	13.87	11.19	12.51	-0.69
YHR108W	59	13.45	0.23	-6.32	5.84	-34	25.19	7.69	50.14	35.08	11.07	12.29
YHR110W	15	11.43	0.76	4.89	N/A	N/A	N/A	-28.79	-34.51	-20.07	-5.21	8.22
YHR112C	65	11.86	0.18	-1.27	5.34	-25	13.64	12.19	-13.13	-14.01	8.97	11.24
YHR113W	17	-4.41	-0.26	-12.99	-9.94	N/A	N/A	4.28	19.68	15.39	7.78	-6.9
YHR115C	161	68.37	0.42	9.44	11.19	-50	42.13	27.14	37.91	26.41	22.06	16.27
YHR116W	11	0	0	0	N/A	N/A	N/A	0	0	1.21	3.55	5.21
YHR121W	69	3.63	0.05	11.9	10.3	-68	11.9	25.65	19.18	24.42	13.85	-6.22
YHR122W	55	-1.21	-0.02	5.91	-12.09	-42	12.38	0.91	-0.45	0.62	4.62	-0.39
YHR123W	37	-5.19	-0.14	-4.26	7.03	-18	4.29	24.23	-1.28	-23.01	-5.9	8.87
YHR127W	28	0.94	0.03	-0.21	3.46	-18	3.46	7.5	2.55	-8.35	-0.11	7.02
YHR128W	61	-6.09	-0.1	-22.86	10.67	-26	23.83	14.15	38.68	38.68	28.97	-26.26
YHR132C	44	-10.48	-0.24	-9.6	-2.13	-21	-1.79	0.58	8.12	15.06	25.86	1.23
YHR132W-A	34	-8.55	-0.25	-8.55	-4.79	-18	-3.72	1.88	6.54	3.51	-2.65	0.27
YHR133C	36	-20.36	-0.57	-15.07	-11.04	-23	-11.5	1.07	17.15	37.34	25.4	27.22
YHR135C	112	60.31	0.54	7.16	38.81	-18	43.05	39.3	33.87	28.18	15.59	6.07
YHR136C	96	-4.37	-0.05	-0.65	2.14	-26	1.07	2.14	-0.93	-0.93	0	2.14
YHR137W	230	13.99	0.06	-1.5	14.23	-93	9.49	21.2	15.79	1.49	0.09	-10.12
YHR138C	54	-11.31	-0.21	2.16	-12.89	-52	3.23	-9.05	-1.97	2.31	6.73	10.84
YHR141C	25	-53.01	-2.12	-46.98	-17.39	-18	-35.81	9.72	16.92	0.62	2.43	-7.73
YHR142W	185	30.34	0.16	1.07	7.4	-105	30.77	18.16	23.79	19.97	4.65	8.39
YHR143W	270	247.21	0.92	40.1	8.12	-262	66.4	0.86	2.13	30.76	73.78	62.27
YHR143W-A	40	-40.06	-1	-22.36	-16.01	-36	-16.45	9.44	19.44	-1.31	-51.3	-111.97
YHR144C	36	-7.18	-0.2	-8.25	6.75	-28	6.75	4.16	-4.49	-4.35	3.23	1.07
YHR146W	27	3.57	0.13	3.57	12.7	-20	12.89	15.19	28.1	30.79	5.34	4.82
YHR147C	37	-5.61	-0.15	-5.61	2.55	-18	1.18	7.68	9.15	7.94	0.83	6.41
YHR148W	15	6.68	0.45	14.38	N/A	N/A	N/A	15.88	7.46	-8.5	-0.06	30.71
YHR149C	55	8.79	0.16	9.38	7.39	-51	13.48	2.74	2.58	-9.14	-22.42	-9.05
YHR161C	319	25.19	0.08	0.14	13.08	-24	20.58	0.03	2.56	7.45	4.24	0.88
YHR162W	170	60.7	0.36	19.61	-48.49	-153	61.95	-28.27	-15.63	12.35	-10.03	-23.37
YHR163W	46	4.88	0.11	-1.69	-11.69	-33	9.58	-2.22	10.73	7.62	24.49	29.29
YHR167W	45	5.91	0.13	5.52	-15.32	-29	8.77	-17.54	-0.19	4.42	9.33	4.85
YHR169W	131	-12.89	-0.1	-13.15	-0.26	-24	8.77	-2.78	-7.24	-1.31	11.34	11.07
YHR170W	53	-51.1	-0.96	6.23	-40.06	-52	6.23	7.76	11.72	2.45	6.92	-7.69
YHR174W	123	28.41	0.23	0	-4.99	-45	49.42	21.76	52.42	49.91	-1.7	-18.61
YHR179W	48	-3.19	-0.07	14.18	-20.72	-44	18.11	0.95	14.18	31.51	26.88	19.66
YHR181W	60	-25.4	-0.42	-5.68	-21.3	-53	-0.35	-2.39	-13.45	-20.72	-1.8	-0.45
YHR183W	79	22.99	0.29	11.71	33.31	-70	24.22	73.59	48.58	24.21	34.49	27.04
YHR187W	37	16.19	0.44	16.38	17.23	-33	17.74	7.45	-4.7	0.08	0.65	-1.72
YHR188C	42	33.67	0.8	14.26	36.88	-31	31.59	38.84	15.71	18.5	57.36	31.73
YHR190W	51	34.88	0.68	5.6	25.08	-24	40.24	31.46	39.15	18.96	-7.33	5.75
YHR191C	43	5.45	0.13	2.22	-0.78	-36	17.11	9.3	21.47	17.32	3.47	3.74
YHR192W	27	3.67	0.14	2.17	16.56	-18	14.83	26.74	28.43	15.04	-5.32	-2.74
YHR193C	19	11.16	0.59	37.41	46.47	-18	37.41	62.21	22.96	-12.97	-18.38	4.8
YHR196W	57	22.38	0.39	-1.07	25.5	-18	29.42	13.32	15.02	12.18	16.9	15.22
YHR197W	7	-2.43	-0.35	-1.4	N/A	N/A	N/A	3.51	1.1	5.04	15.93	12.34
YHR200W	33	6.54	0.2	15.66	-20.93	-32	15.66	-24.65	3.99	21.62	12.76	20.57
YHR201C	18	-2.18	-0.12	4.68	2.4	N/A	N/A	9.38	-6.74	-9.21	11.41	23.29
YHR203C	28	8.2	0.29	4.58	13.36	-18	7.48	-2.34	-7.22	12.89	21.8	6.32
YHR204W	207	3.36	0.02	-2.53	10.42	-18	8.4	8.71	-0.66	-8.26	-9.08	8.26
YHR206W	299	20.41	0.07	-7.8	3.86	-215	12.36	14.03	10.92	-0.73	9.36	14.17
YHR208W	24	11.04	0.46	22.9	19.7	-23	22.9	25.88	21.74	27.2	29.13	10.04
YHR215W	46	-0.63	-0.01	-3.08	4.93	-25	4.36	3.24	19.28	37.92	29.08	37.85
YHR216W	197	14.92	0.08	1.21	2.09	-105	19.39	4.23	24.42	36.64	26.29	9.82
YIL002W-A	14	3.66	0.26	9.37	N/A	N/A	N/A	7.82	13.68	9.49	-0.94	-0.54
YIL003W	32	9.88	0.31	9.88	5.31	-31	9.88	-7.12	-4.54	-0.41	-2.22	2.17
YIL004C	19	-12.48	-0.66	-9.91	-4.8	-18	-9.91	1.27	2.71	5.68	5.23	15.75
YIL008W	55	8.38	0.15	2.99	9.36	-24	11.05	14.22	12.44	2.9	0.67	23.28
YIL009C-A	38	3.37	0.09	1.58	18.67	-19	22.01	21.51	-8.24	-23.32	-0.54	0.79
YIL010W	29	-1.79	-0.06	-0.72	8.69	-18	4.15	19.19	6.61	-6.91	-9.82	-8.67
YIL011W	34	19.41	0.57	18.21	11.12	-33	18.21	2.46	7.58	8.16	5.72	14.71
YIL014W	151	10.95	0.07	0.28	12.4	-23	17.94	4.06	1.82	2.58	3.21	8.05
YIL016W	19	9.96	0.52	22.07	22.1	-18	22.07	6.46	-33.69	-23.28	13.25	10.67
YIL018W	27	17.11	0.63	14.6	-2.96	-19	14.64	10.11	55.71	59.57	5.16	-23.38
YIL020C	54	2.42	0.04	2.42	-1.36	-53	2.42	-1.36	3.21	5.35	6.83	5.89
YIL021W	65	12.09	0.19	8.18	-4.12	-55	14.88	-0.95	3.24	-4.93	-0.79	0.65
YIL022W	112	82.9	0.74	7.35	53.53	-29	71.47	17.1	5	26.78	46.74	39.56
YIL023C	208	-3.39	-0.02	0	-6.29	-25	2.95	-11.9	13.09	22.24	20.48	37.09
YIL027C	60	15.95	0.27	13.94	4.9	-52	23.78	4.56	6.53	8.3	19.31	18.16
YIL029C	107	-2.76	-0.03	-2.12	-1.44	-43	6.42	4.09	0.54	-2.34	0	3.34
YIL033C	96	33.54	0.35	20.94	6.95	-93	21.41	32.79	15.38	5.25	6.92	12.01
YIL034C	16	-25.94	-1.62	-16.51	-16.51	N/A	N/A	30.87	33.47	-5.28	-9.11	30.2
YIL035C	113	16.51	0.15	6.57	9.59	-91	16.48	5.54	-7.87	-12.11	-0.37	7.45
YIL036W	59	-3.68	-0.06	-10.85	4.85	-21	9.69	4.42	17.14	20.51	7.05	6.72
YIL038C	220	39.24	0.18	0.14	16.62	-23	19.52	14.29	9.73	3.64	-3.21	-4.74
YIL039W	43	-3.8	-0.09	1.94	13.42	-22	12.11	23.87	16.39	36.78	31.6	14.3
YIL040W	10	-11.54	-1.15	8.47	N/A	N/A	N/A	17.9	16.64	17.36	-2.1	-1.53
YIL041W	24	-2.52	-0.1	2.46	-2.65	-20	2.85	27.53	7.02	-30.03	-2.49	17.7
YIL043C	13	-7.33	-0.56	-4.01	N/A	N/A	N/A	18.96	49.27	71.78	43.55	28.8
YIL044C	47	4.05	0.09	1.45	11.9	-20	10.24	10.81	6.55	13.94	6.1	-3.66
YIL046W	95	-0.34	0	0	-1.69	-52	3.02	1.81	4.55	0.2	-15.43	-13.51
YIL048W	331	-6.9	-0.02	-4.82	-2.49	-209	7.39	7.14	7	11.84	5.57	-4.94
YIL049W	6	2.14	0.36	3.27	N/A	N/A	N/A	2.8	4.22	-1.04	5.24	-1.49
YIL051C	35	-3.74	-0.11	8.61	-29.63	-34	8.61	11.34	23.91	11.66	16.48	21.13
YIL052C	32	-25.36	-0.79	-28.45	13.9	-18	13.62	35	27.83	27.29	21.99	33.34
YIL053W	19	1.31	0.07	16.07	23.67	-18	16.07	-1.86	-15.38	10.81	4.5	19.45
YIL062C	30	15.59	0.52	17.26	11.39	-18	17.29	-11.81	-1.28	3.68	15.8	31.72
YIL063C	31	-2.39	-0.08	-2.39	-6.79	-28	-1.49	-9.8	-6.46	12.72	18.55	6.5
YIL064W	2	0	0	0.14	N/A	N/A	N/A	0.14	1.21	-9.85	-18.35	-7.42
YIL065C	52	20.31	0.39	5.54	18.12	-37	25.91	13.27	9.93	-5.29	-12.38	1.47
YIL069C	59	18.58	0.31	4.21	12.92	-34	28.43	8.57	-9.41	10.09	9.78	33.94
YIL070C	34	4.68	0.14	5.61	-10.85	-29	9.15	-3.18	4.29	1.34	5.39	-3.33
YIL074C	115	4.75	0.04	4.34	14.27	-34	12.33	32.91	39.97	39.17	28.61	12.72
YIL075C	54	21.37	0.4	14.13	1.93	-39	22.43	7.94	13.92	4.78	-7.18	-6.31
YIL076W	12	-8.86	-0.74	-5.04	N/A	N/A	N/A	-5.39	0.53	25.55	30.03	1.9
YIL078W	39	9.53	0.24	-1.42	1.47	-30	15.17	-13.81	-9.02	22.79	20.59	9.75
YIL083C	91	14.72	0.16	17.79	21.15	-84	18.3	41.3	13.83	-5.98	15.69	17.89
YIL085C	71	-9.05	-0.13	-4.7	4.74	-50	7.43	21.73	28.41	5.15	3.48	6.14
YIL088C	51	-22.01	-0.43	0.1	1.01	-20	3.23	35.82	12.96	1.5	-0.53	-5.5
YIL090W	124	18.42	0.15	-2.57	12.29	-80	29.06	6.86	2.5	-1	6.59	12.75
YIL093C	69	8.74	0.13	2.88	-9.27	-43	7.09	-9.98	5.21	21.88	14.95	1.49
YIL094C	65	-3.69	-0.06	30.58	0.84	-63	31.6	13.55	36.01	38.94	32.61	51.31
YIL103W	28	3.94	0.14	3.94	4.37	-20	5.57	3.25	-1.04	-0.95	0.16	3.17
YIL106W	104	-2.92	-0.03	0	2.23	-20	2.37	7.19	15.47	17.42	13.18	7.24
YIL108W	95	-20.59	-0.22	-5.45	-15.98	-81	2.7	21.78	45.8	23.71	11.88	3.78
YIL109C	90	70.06	0.78	19.27	47.49	-18	54.42	26.93	29	18.15	19.58	49.62
YIL110W	40	-26.67	-0.67	-17.36	-8.97	-18	-6.73	14.19	19.21	2.55	-19.04	-4.33
YIL111W	23	-21.84	-0.95	-19.13	-18.86	-19	-17.28	19.13	7.28	-3.65	-4.66	-3.58
YIL114C	18	-25.16	-1.4	-26.81	-27.74	N/A	N/A	-12.72	-20.82	-9.88	-2.56	7.49
YIL115C	163	4.16	0.03	8.56	-8.51	-125	21.31	2.78	4.92	3.21	0.88	1.48
YIL116W	22	0.33	0.02	0.33	-1.81	-21	0.33	-11.6	-16.33	5.91	-0.85	-4.67
YIL117C	96	-12.74	-0.13	4.66	3.72	-95	4.66	-1.65	-4.62	5.18	10.39	0.23
YIL118W	106	-14.24	-0.13	5.42	3.3	-96	10.92	47.36	62.21	12.87	-9.46	9.04
YIL121W	47	-2.3	-0.05	1.69	0.38	-35	2.74	5.72	9.2	40.01	37.06	-2.57
YIL123W	491	3.51	0.01	-1.72	13.71	-326	6.96	35.67	39.93	25.79	25.68	51.67
YIL124W	49	2.21	0.05	1.99	18.45	-18	11.23	14.81	4.47	20.77	28.33	31.36
YIL125W	60	-14.92	-0.25	2.02	-0.06	-55	4.45	4.38	-0.7	-2.01	-0.43	4.41
YIL131C	75	-4.26	-0.06	-2.79	-4.73	-24	6.04	-11.08	-4.55	2.32	-5.2	-8.64
YIL133C	39	-28.52	-0.73	-21.61	-9.87	-22	-18.64	-4.63	-25.08	-7.4	-16.72	-8.17
YIL134W	38	-0.17	0	-0.36	4.2	-18	1.46	5.83	-5	-1.1	3.61	2.15
YIL135C	89	27.45	0.31	5.48	14.05	-74	16.97	18.07	33.75	33.78	-5.03	-4.66
YIL137C	51	-12.63	-0.25	-5.7	-9.28	-45	-0.57	15.45	27.99	15.07	1.68	2.88
YIL138C	22	2.26	0.1	3.07	1.97	-21	3.07	-2.41	5.19	11.69	2.48	-11.83
YIL143C	34	6.69	0.2	3.95	10.33	-19	7.12	10.6	6	10.82	10.5	11.1
YIL145C	45	15.83	0.35	6.46	9.13	-21	16.3	-11.19	-11.03	19	26.74	19.87
YIL148W	15	9.11	0.61	12.09	N/A	N/A	N/A	23.79	39.36	45.01	32.26	23.6
YIL153W	24	11.52	0.48	19.48	23.78	-18	22.85	13.83	3.49	11.49	17.17	16.11
YIL154C	20	6.59	0.33	0.16	-1.34	-19	0.16	-2.14	13.57	13.44	-2.67	-6.62
YIL157C	63	2.74	0.04	-0.79	5.16	-33	5.79	4.93	-5.43	-6.89	14.26	17.98
YIL158W	32	-11.75	-0.37	-8.29	-18.91	-31	-8.29	-0.06	4.15	4.91	4.57	1.07
YIL162W	219	-6.02	-0.03	-3.73	1.07	-44	1.07	1.07	-3.62	-3.47	-3.15	1.54
YIR006C	49	21.96	0.45	9.9	18.25	-32	22.03	1.87	8.36	36.3	27.46	25.93
YIR008C	15	-9.95	-0.66	1.59	N/A	N/A	N/A	13.36	-1.12	-8.27	2.38	12.59
YIR009W	51	10.57	0.21	8.05	5.76	-32	12.8	-0.69	-1.66	6.2	-1.42	-7.76
YIR011C	10	0.27	0.03	-0.75	N/A	N/A	N/A	1.95	3.15	9.87	3.98	-6.5
YIR012W	12	-11.21	-0.93	-10.51	N/A	N/A	N/A	-4.66	-3.97	5.99	8.34	14.47
YIR016W	50	23.02	0.46	16.02	15.15	-18	17.37	17.23	26.91	20.89	19.1	20.16
YIR018W	23	7.51	0.33	6.67	13.99	-18	11.72	-5.07	-19.85	-2.35	6.2	-3.51
YIR026C	29	-1.24	-0.04	-1.24	-2.89	-24	4.11	11.5	17.26	-7.41	-3.11	9.08
YIR034C	37	-0.39	-0.01	3.54	3.56	-36	3.54	11.66	0.9	4.52	12.7	-6.27
YIR035C	42	9.97	0.24	13.39	0.85	-37	14.32	-4.64	-3.56	9.81	6.56	-6.71
YIR037W	47	42.32	0.9	40.5	1.25	-46	40.5	31.38	25.71	1.82	-21.08	-15.34
YIR038C	27	-2.95	-0.11	-10.65	-12.99	-26	-10.65	-20.38	-14.74	-2.44	-17.1	-12.69
YJL001W	42	2.66	0.06	8.45	-8.38	-27	11.29	-9.12	-10.96	9.86	39.79	-15.7
YJL002C	42	21.2	0.5	23.96	10.13	-36	35.7	16.57	3.13	9.64	26.23	13.46
YJL004C	9	-5.53	-0.61	-0.57	N/A	N/A	N/A	-7.99	-11.61	10	7.29	4.09
YJL005W	157	-5.72	-0.04	0	-3.76	-99	8.56	-0.39	0.82	1.76	8.65	9.39
YJL008C	27	1.48	0.05	5.46	28.69	-22	20.43	32.41	6.34	14.85	17.05	-11.88
YJL011C	46	-7.21	-0.16	-1.22	-14.66	-45	-1.22	-4.87	4.81	3.43	-0.53	0.11
YJL012C	33	-12.05	-0.37	-17.43	-15.41	-28	-11.58	-0.78	7.18	-1.46	-0.96	5.36
YJL014W	33	7.13	0.22	5.67	-0.47	-30	8.06	-9.63	-14.72	-3.22	19.95	26.01
YJL016W	390	33.36	0.09	3.38	4.63	-147	11.83	7.85	3.45	8.32	22	9.33
YJL020C	75	-4.18	-0.06	9.55	-22.24	-63	15.72	3.62	9.12	8.93	3.29	-1.85
YJL024C	20	-2.36	-0.12	-1.53	-2.91	-18	-1.06	-0.43	-0.31	9.01	17.13	25.04
YJL026W	43	-14.62	-0.34	-16.89	-2.9	-24	4.56	31.08	60.79	23.44	11.94	-1.77
YJL034W	40	-11.52	-0.29	-5.09	28.65	-18	24.63	31.67	13.97	19.16	21.96	11.16
YJL039C	18	1.21	0.07	-0.67	-3.32	N/A	N/A	3.01	13.87	11.02	5.76	-3.17
YJL041W	59	43.26	0.73	38.31	-0.77	-58	38.31	2.32	14.37	20.22	20.78	7.61
YJL042W	79	27.66	0.35	12.84	15.29	-67	19.94	7.87	1.22	0.27	1.29	-0.83
YJL044C	46	25.24	0.55	10.45	17.71	-35	23.13	-0.09	-8.56	-4.35	0.5	-3.56
YJL050W	184	19.78	0.11	17.89	-14.71	-183	17.89	6.21	16.3	16.56	4.38	-9.3
YJL052W	76	18.64	0.25	7.62	10.59	-52	26.88	54.2	55.58	29.49	-7.19	-16.38
YJL054W	21	-1.09	-0.05	9.88	17.18	-20	9.88	24.43	10.09	5.42	0.01	0.78
YJL055W	22	-3.47	-0.16	-5.53	-7.84	-21	-5.53	3.85	13.81	5.28	0.5	14.63
YJL059W	100	1.99	0.02	1.07	-2.29	-24	9.87	2.2	5.39	-0.21	-0.34	8.88
YJL060W	62	4.16	0.07	2.42	3.89	-37	11.04	17.07	20.81	13.22	6.34	-6.87
YJL061W	65	15.83	0.24	3.86	6.97	-37	12.9	0.72	-2.02	4.61	17.92	15.97
YJL062W	34	5.64	0.17	5.64	5.94	-21	11.03	9.73	12.15	11.57	14.82	17.94
YJL062W-A	17	-7.15	-0.42	-19.33	-15.96	N/A	N/A	-25.31	2.56	24.19	-4.74	-23.95
YJL063C	31	-26.47	-0.85	-26.47	-8.27	-18	-14.41	16.54	13.83	-9.93	-21.77	-5.13
YJL069C	24	9.09	0.38	10.46	10.76	-22	12.13	6.55	11.61	5.24	0.38	12.49
YJL076W	46	18.9	0.41	10.82	15.99	-39	18.49	14.47	11.57	15.25	13.76	14.51
YJL078C	66	-1.71	-0.03	27.43	-17.36	-55	37.34	15.14	3.5	6.86	19.12	25.06
YJL079C	185	86.86	0.47	2.84	7.53	-78	31.79	4.8	21.91	35.38	45.52	45.32
YJL080C	184	72.96	0.4	12.71	23.55	-24	30.81	21.56	22	18.55	14.44	25.45
YJL081C	31	-1.16	-0.04	-1.16	-1.62	-30	-1.16	1.05	4.51	1.79	-4.12	-4.66
YJL091C	9	1.07	0.12	5.95	N/A	N/A	N/A	6.09	12.2	18.87	31.7	28.07
YJL094C	65	-9.07	-0.14	2.14	1.71	-58	4.88	12.94	-9.43	-1.3	10.88	9.73
YJL096W	32	-9.28	-0.29	-10.02	4.19	-19	6.92	2.83	3.26	-2.68	9.75	19.86
YJL097W	45	30.71	0.68	24.98	-6.56	-34	30.52	-10.92	6.05	8.97	11.23	20.29
YJL101C	154	-4.56	-0.03	-2.71	-13.28	-127	9.51	7.41	16.7	22.37	11.91	11.22
YJL104W	31	-0.54	-0.02	-0.54	3.81	-24	9.82	0.65	5.68	-2.14	-0.46	10.63
YJL109C	39	-4.34	-0.11	-3.86	4.15	-18	-1.02	1.13	1.34	10.9	14.34	15.27
YJL111W	167	23.76	0.14	0	-0.34	-49	29.49	13.88	15.01	29.47	32.23	13.5
YJL117W	140	11.79	0.08	9.26	18.37	-18	18.5	-0.7	0.78	17.6	28.78	27.84
YJL121C	101	-15.04	-0.15	-0.79	1.53	-45	2.99	45.07	46.95	19.38	22.06	48.38
YJL122W	30	-21.43	-0.71	-22.36	-7.78	-20	-13.65	28.76	26.73	11.91	-1.75	-29.64
YJL124C	159	54.05	0.34	12.03	14.1	-32	30.64	19.06	11	6.19	12.58	27.75
YJL127C-B	133	-3.1	-0.02	7.06	1.76	-126	12.19	-3.4	-0.46	-2.2	-4.06	-2.31
YJL128C	194	21.82	0.11	-0.99	2.02	-120	18.8	9.86	22.7	17.02	-9.84	-11.83
YJL129C	144	-15.03	-0.1	2.88	-0.04	-143	2.88	6.11	9.94	4.88	-0.03	-1.7
YJL130C	625	33.8	0.05	0	13.09	-52	14.7	51.82	44.46	9.95	3.4	11.69
YJL133C-A	59	-13.01	-0.22	1.21	-21.85	-57	2.88	-20.04	-1.54	18.53	15.82	3.27
YJL133W	172	9.62	0.06	0	2.68	-75	10.31	11.11	-2.01	-1.49	14.19	17.86
YJL136C	22	-23.07	-1.05	-21.45	-4.24	-18	-10.13	4.43	11.76	14.16	39.24	55.16
YJL137C	57	-1.02	-0.02	-1.17	-1.36	-35	3.97	-4.61	-7.55	3.91	8.83	5.33
YJL138C	89	48.39	0.54	-3.61	9.04	-46	48.61	29.14	42.72	38.65	49	26.01
YJL140W	85	23.51	0.28	15.48	-2.76	-64	22.55	1.87	-5.69	-1.02	5.64	18.71
YJL143W	44	-7.45	-0.17	-16.39	15.63	-18	9.32	9.32	20.62	28.56	-20.27	-49.65
YJL145W	41	2.81	0.07	4.29	-1.03	-36	4.43	9.64	1.66	-16.63	-21.65	-4.2
YJL148W	44	19.03	0.43	12.86	17.18	-23	18.43	22.9	20.43	5.47	10.2	25.57
YJL151C	25	-4.72	-0.19	5.83	19.08	-18	17.69	31.89	21.52	5.78	-7.76	2.95
YJL154C	56	6.55	0.12	7.86	0.82	-49	8.6	7.31	1.69	7.8	19.54	10.57
YJL158C	28	22.77	0.81	22.91	-6.64	-25	24.38	22.87	39.94	52.29	63.39	45.62
YJL159W	56	10.82	0.19	32.17	-52.53	-43	50.74	16.42	57.56	77.98	71.87	59.17
YJL166W	96	14.7	0.15	29.71	5.02	-78	46.33	53.91	72.9	62.34	11.62	0.8
YJL167W	58	30.19	0.52	34.9	-4.23	-53	35.62	1.18	-0.48	-10.89	-12.18	2.94
YJL171C	40	1.23	0.03	2.91	6.54	-22	6.48	12.73	-3.32	1.59	19.57	4.59
YJL172W	27	11.46	0.42	3.11	8.82	-24	5.54	0.45	-5.1	19.87	34.82	2.66
YJL174W	117	13.98	0.12	-0.11	-13.33	-41	14.41	4.21	19.73	16.44	8.19	20.48
YJL177W	40	-1.39	-0.03	4.38	23.04	-18	15.61	59.65	35.58	8.51	24.27	26.64
YJL178C	24	-10.25	-0.43	-0.68	4.39	-20	2.82	19.11	1.56	6.91	22.36	14.4
YJL179W	44	28.9	0.66	9.22	38.94	-18	39.78	7.2	-9.72	9.47	15.12	20.55
YJL183W	77	3.7	0.05	-1.87	-15.12	-65	32.15	8.58	-4.63	2.1	17.3	21.59
YJL184W	30	12.99	0.43	12.77	11.88	-28	13.7	17.85	17.85	6.78	12.78	10.52
YJL186W	20	8.88	0.44	11.54	8.7	-19	11.54	0.79	-2.24	-2.18	7.81	30.52
YJL189W	28	43.61	1.56	57.77	106.57	-18	92.68	104.52	44.4	-44.62	-30.42	3.79
YJL190C	13	-13.4	-1.03	12.07	N/A	N/A	N/A	50.85	31.87	-15.45	-16.06	-3.59
YJL191W	18	6.64	0.37	34.81	29.26	N/A	N/A	31.34	18.06	36.51	43.68	32.22
YJL192C	27	25.38	0.94	18.93	3.35	-26	18.93	-5.97	28.66	33.51	26.03	10.91
YJL193W	103	-0.2	0	1.07	-3.53	-85	3.21	1.83	1.94	3.45	15.06	19.35
YJL196C	46	2.54	0.06	-7.51	12.31	-25	19.86	3.12	-12.81	-13.76	-0.35	10.18
YJL198W	164	13.55	0.08	0	2.19	-36	17.56	0.01	11.92	11.36	17.02	16.16
YJL200C	42	-10.15	-0.24	-5.89	-7.94	-39	-4.22	1.53	4.45	-1.15	-5.62	0.78
YJL205C	52	-15.97	-0.31	-1.58	-11.11	-49	0.56	-11.59	-7.99	-4.4	-3.92	13.71
YJL212C	33	4.82	0.15	1.99	8.85	-18	9.87	4.98	16.37	32.81	45.97	18.31
YJL217W	81	-1.7	-0.02	-3.36	-5.8	-36	9.71	2.9	27.76	25.6	16.36	8.06
YJR001W	58	8.74	0.15	19	12.69	-57	19	5.87	-13.28	2.36	16.93	20.85
YJR002W	18	2.2	0.12	3.89	0.55	N/A	N/A	2.51	7.87	2.49	0.42	12.06
YJR005W	48	0.35	0.01	0.54	3.48	-36	7.74	5.72	4.32	5.24	4.97	0.88
YJR006W	6	2.74	0.46	18.1	N/A	N/A	N/A	19.81	6.78	9.18	13.13	0.55
YJR007W	87	52.22	0.6	11.4	13.88	-47	29	12.76	4.63	5.85	21.97	23.2
YJR009C	34	-26.76	-0.79	-19.66	9.63	-18	-11	67.78	55.93	51.4	31.31	-10.2
YJR010W	91	-23.36	-0.26	-5.45	-7.85	-45	-1.58	5.26	11.6	3.69	-1.48	3.12
YJR014W	39	19.01	0.49	17.3	-9.67	-37	18.37	-12.12	26.85	40.78	27.35	-0.16
YJR016C	18	-7.55	-0.42	12.34	14.84	N/A	N/A	27.11	23.95	14.73	4.14	6.62
YJR017C	24	14.74	0.61	14.73	-1.09	-21	17.81	2.9	26.77	23.49	21.37	17.56
YJR021C	125	-3.95	-0.03	0	-7.45	-20	0.26	-30.97	-17.67	10.74	9.2	1.26
YJR025C	68	12.78	0.19	12.17	-0.89	-58	12.45	-1.63	-2.56	-21.5	-20.52	13.07
YJR040W	44	16.68	0.38	11.18	6.51	-30	15.8	10.11	11.09	-2.67	13.35	27.15
YJR041C	70	5.61	0.08	2.07	7.99	-56	7.5	7.73	8.29	5.75	3.04	4.89
YJR042W	75	25.57	0.34	2.14	18.74	-20	24.37	-8.83	-5.42	2.15	3.61	7.73
YJR044C	65	-7.42	-0.11	14.41	-17.19	-62	17.45	15.33	13.28	5.79	9.16	10.32
YJR045C	141	124.46	0.88	24.88	30.99	-99	49.91	-13.71	-12.16	27.88	30.82	22.42
YJR046W	18	-1.36	-0.08	-2.15	-1.08	N/A	N/A	1.83	15.41	16.91	7.11	8.05
YJR047C	31	-7.37	-0.24	-7.37	-3.62	-20	0.79	4.42	23.9	63.52	57.24	-2.88
YJR048W	51	-22.17	-0.43	-1.64	-41.34	-50	-1.64	-48.33	-60.23	-47.52	1.47	13.58
YJR049C	31	-10.48	-0.34	-10.48	-8.5	-27	-10.34	6.49	9.25	6.54	5.57	6.28
YJR057W	20	-2.77	-0.14	-5.8	-5.8	-19	-5.8	1.8	8.46	-3.46	-6.16	2.99
YJR058C	73	-11.04	-0.15	-7.06	-1.14	-47	4.18	8.71	24.29	33.2	8.62	2.35
YJR059W	61	3.24	0.05	-1.03	7.75	-40	12.4	14.99	-1.26	-11.37	-0.51	4.56
YJR060W	124	3.53	0.03	-7.34	13.96	-74	16.43	9.07	-4.73	0.03	5.02	2.89
YJR062C	6	1.67	0.28	8.6	N/A	N/A	N/A	-1.7	-9.24	-16.7	-8.71	11.18
YJR063W	37	1.77	0.05	3.04	4.81	-22	12.48	14.12	23.27	30.79	19.28	-10.07
YJR064W	49	-12.56	-0.26	6.15	0.19	-35	14.33	65.48	52.57	15.86	16.85	30.05
YJR065C	17	10.12	0.6	-8.21	-11.35	N/A	N/A	-4.22	25.24	14.97	14.74	23.6
YJR067C	2	1.07	0.54	6.45	N/A	N/A	N/A	7.48	7.08	3.49	1.35	0.74
YJR068W	31	4.98	0.16	4.98	5.79	-30	4.98	-6.97	-10.91	3.88	18.29	14.94
YJR069C	38	11.21	0.3	6.42	31.45	-18	27.15	30.14	21.63	13.58	3.64	15.02
YJR072C	35	15.63	0.45	17.71	18.58	-22	22.24	13.75	21.59	6.49	-3.9	11.07
YJR073C	32	13.99	0.44	12.92	7.96	-19	14.42	-2.72	-2.42	14.17	24.67	16.98
YJR074W	11	0	0	0	N/A	N/A	N/A	0	-0.93	-0.93	1.07	-8.39
YJR075W	49	-2.87	-0.06	-13.11	19.74	-18	20.59	5.78	-8.41	2.8	20.01	25.88
YJR076C	50	9.65	0.19	10	5.56	-49	10	9.39	-0.88	-1.2	-2.06	6.95
YJR077C	49	28.53	0.58	6.39	56.8	-18	44.39	30.26	20.93	24.37	27.58	49.56
YJR080C	37	11.4	0.31	4.39	-12.94	-30	14.52	-17.3	12.08	6.91	5.65	5.59
YJR085C	25	-4.15	-0.17	-9.81	13.48	-19	-1.88	20.9	21.76	12.41	-7.19	7.85
YJR086W	24	-2.39	-0.1	-2.48	-1.05	-18	2.59	11.22	17.63	8.93	11.15	7.68
YJR088C	31	18.57	0.6	18.57	14.59	-30	18.57	2.17	-10.53	-4.62	20.92	17.03
YJR091C	17	-4.2	-0.25	-4.26	-3.19	N/A	N/A	1.1	8.61	12.89	8.18	0.95
YJR094W-A	40	-43.26	-1.08	-15.52	-45.17	-39	-15.52	-0.39	33.19	45.32	41.81	-19.81
YJR096W	123	1.82	0.01	2.28	5.32	-65	8.69	5.05	6.83	-3.29	-3.06	7.08
YJR100C	63	3.02	0.05	-0.79	4.63	-18	4.63	-10.54	-13.03	6.51	5.39	3.8
YJR101W	82	13.04	0.16	6.99	-16.12	-47	17.38	1.4	17.75	15.49	7.07	6.41
YJR103W	104	-2.39	-0.02	1.67	-11.44	-97	1.81	-7.98	17.57	25.57	7.81	4.62
YJR104C	30	-8.33	-0.28	-9.24	7.95	-18	-2.48	51.49	75.98	75.88	24.64	48.08
YJR105W	36	4.95	0.14	-2.41	33.82	-18	24.49	29.66	18.24	26.92	33.93	39.73
YJR109C	90	-0.13	0	4.38	-11.89	-89	4.38	-0.86	6.39	-4.36	-5.29	0.74
YJR112W-A	23	-23.62	-1.03	-23.62	-6.81	-18	-15.96	14.28	14.31	0.03	-5.41	1.18
YJR116W	241	31.06	0.13	5.01	13.82	-94	26.49	13.77	5.05	2.02	3.05	6.08
YJR117W	32	19.96	0.62	18.29	17.99	-18	26.94	26.5	27.85	11.66	26.78	39.13
YJR118C	64	15.4	0.24	-6.01	5.45	-37	28.12	-17.74	-12.96	-4.92	0.5	2.06
YJR123W	38	-14.52	-0.38	-10.74	37.31	-18	28.51	18.07	-17.06	-31.17	-21.94	-7.7
YJR124C	44	3.92	0.09	5.88	7.35	-22	8.26	11.45	12.06	-7.71	-15.21	1.95
YJR125C	62	27.55	0.44	14.87	-9.58	-51	22.08	-10.43	2.4	0.32	3.68	6.02
YJR132W	95	20.08	0.21	0.28	9.88	-23	14.61	8.65	17.82	21.5	-9.73	-21.38
YJR133W	91	-26.6	-0.29	-14.67	9.11	-23	11.15	3.97	3.66	14.33	1.89	-10.59
YJR135W-A	23	-20.4	-0.89	-11.71	-0.07	-19	-6.83	29.99	24.7	-6.32	-15.08	22.2
YJR137C	82	-18.06	-0.22	2.83	-0.78	-32	2.98	13.09	12.02	2.41	2.74	10.59
YJR139C	88	-6.79	-0.08	-29.37	-10.36	-56	30.72	-0.59	24.8	48.88	24.69	10.36
YJR141W	35	0.93	0.03	0.93	2.14	-25	3.07	6.05	4.29	1.13	10.11	1.78
YJR142W	5	0.74	0.15	6.71	N/A	N/A	N/A	1.49	0.88	1.4	-7.34	-12.08
YJR143C	68	52.74	0.78	3.38	61.34	-25	56.22	52.26	51.92	44.84	12.01	13.85
YJR144W	23	5.45	0.24	5.45	7.45	-19	7.59	-7.66	-5.11	10.66	6.57	7.26
YJR145C	22	-9.13	-0.41	-15.67	5.29	-18	-8.04	-6.88	-12.52	12.11	22.07	6.32
YJR148W	59	-3	-0.05	0.2	0.26	-40	11.47	33.27	51.11	64.16	58.33	-6.91
YKL001C	31	13.79	0.44	13.79	12.76	-20	23.85	8.05	-23.09	-53.48	-14.96	17.81
YKL002W	79	2.09	0.03	8.16	6.39	-74	8.52	0.95	-1.5	-0.93	-0.79	-0.51
YKL003C	16	-4.35	-0.27	-3.73	-3.73	N/A	N/A	16.62	19.14	16.42	5.55	-5.71
YKL004W	354	146.25	0.41	26.03	16.66	-236	54.89	18	3.34	38.21	51.12	37.92
YKL006C-A	32	2.87	0.09	2.92	-5.58	-31	2.92	-0.17	-1.87	-5.14	-16.84	-14.75
YKL006W	29	-53.42	-1.84	-58.16	-56.5	-21	-57.16	23.36	35.76	18.48	25.18	20.54
YKL007W	21	-10.82	-0.52	-7.03	-9.73	-20	-7.03	26.04	14.92	13.76	-0.01	-17.48
YKL008C	73	35.86	0.49	40.25	3.49	-60	53.04	49.53	35.26	40.58	52.15	46.24
YKL009W	42	4.93	0.12	16.64	6.04	-41	16.64	40.69	45.8	26.03	1.85	-11.4
YKL013C	34	-8.83	-0.26	-10.67	22.93	-18	17.98	24.95	31.38	36.91	10.69	5.17
YKL016C	68	6.99	0.1	3.59	10.33	-18	13.11	-6.88	-5.78	27.11	4.88	-6.07
YKL018W	50	-15.74	-0.31	-16.1	16.24	-18	5.3	21.93	11.02	7.86	-3.18	0
YKL019W	70	3.41	0.05	-0.65	12.21	-34	19.97	4.93	10.85	7.95	4.36	23.81
YKL024C	227	-38.69	-0.17	5.02	24.98	-165	27.65	24.74	15.47	13.24	-0.63	-11.92
YKL025C	10	5.12	0.51	9.32	N/A	N/A	N/A	6.94	13.4	8.52	4.42	-1.44
YKL028W	35	3.76	0.11	3.76	5.62	-25	6.36	0.12	-2.22	3.88	-1.69	0.85
YKL029C	37	0.78	0.02	-2.31	10.37	-18	7.98	16.07	24.75	10.82	8.05	-3.35
YKL032C	184	54.92	0.3	5.95	10.37	-41	27.11	19.08	23.27	21.4	23.24	23.11
YKL033W-A	89	-10.49	-0.12	21.05	-11.25	-74	32.74	8.07	-1.03	16.77	37.02	-7.71
YKL034W	4	0.74	0.18	11.23	N/A	N/A	N/A	12.92	2.16	0.94	13.63	14.85
YKL035W	73	80.56	1.1	56.84	-0.38	-71	57.77	6.49	14.06	39.62	77.32	60.9
YKL039W	141	15.36	0.11	6.06	-4.6	-40	13.64	15.49	29.11	19.05	-8.88	-7.86
YKL040C	434	-14.46	-0.03	-5.48	5.91	-412	6.55	2.55	-6.12	-21.59	-15	14.07
YKL045W	62	6.42	0.1	3.21	4.28	-19	4.28	-1.71	-2.04	6.22	6.86	-3.22
YKL046C	236	41.73	0.18	6.7	11.85	-103	32.02	5.59	21.71	21.55	-4.79	6.45
YKL047W	57	2.95	0.05	-1.26	4.48	-33	6.17	4.07	3.8	0.22	2.73	0.22
YKL051W	183	-19.54	-0.11	-0.92	-1.96	-92	5.62	6.03	13.24	3.83	-1.48	4.12
YKL052C	34	3.01	0.09	2.27	4.75	-18	7.08	6.46	6.05	-1.57	3.81	3.89
YKL053C-A	75	7.32	0.1	1.46	-4.68	-55	12.68	2.91	-20.57	-33.1	-0.16	5.75
YKL054C	86	16.91	0.2	5.05	12.54	-24	15.57	14.25	7.16	3.05	5.65	5.74
YKL056C	110	11.15	0.1	0.59	-3.19	-22	14	-0.78	10.79	-5.67	27.98	29.6
YKL057C	35	17.43	0.5	18.36	5.62	-34	18.36	2.98	6.41	17.95	7.07	-0.01
YKL058W	22	16.52	0.75	26.65	46.27	-18	44.95	26.94	5.69	14.66	16.36	7.19
YKL060C	12	2.17	0.18	31.98	N/A	N/A	N/A	-1.19	10.6	37.29	34.45	39.5
YKL063C	161	26.2	0.16	-4	7.26	-60	18.75	8.05	2.06	7.91	10.23	1.55
YKL065C	32	-21.25	-0.66	-24.69	-6.62	-23	-0.05	2.38	26.08	13.07	14.42	24.46
YKL067W	58	-23.48	-0.4	-0.14	-22.98	-48	7.58	-17.94	-4.88	13.99	3.73	-7.68
YKL068W	122	15.34	0.13	1.07	16.57	-18	13.83	17.66	-0.14	-5.1	1.96	6.47
YKL068W-A	44	2.21	0.05	-3.26	14.92	-18	13.25	17.2	9.43	8.32	17.1	18.88
YKL069W	31	-4.6	-0.15	-4.6	-1.07	-19	-0.66	14.2	16.41	9.75	5.08	1.4
YKL073W	93	-3.33	-0.04	-6.15	4.99	-51	8.72	3.57	3.07	4.12	-3.18	7.4
YKL077W	54	15.08	0.28	14.1	-5.82	-32	16.59	-6.14	12.72	2.62	-20.11	-12.04
YKL080W	93	5.18	0.06	0.89	22.93	-18	25.57	38.49	3.17	9.85	65.29	71.01
YKL081W	29	39.26	1.35	46.27	41.48	-22	50.01	-5.82	-24.2	5.34	7.55	25.36
YKL085W	117	-6.32	-0.05	-4.03	0.37	-83	11.34	-6.71	8.13	19.22	9.19	0.08
YKL087C	90	11.03	0.12	6.55	7.06	-44	8.2	3.33	-2.76	8.16	-1.21	-3.47
YKL094W	25	-10.78	-0.43	-3.82	5.97	-18	-0.05	32.41	23.9	-20.19	-29.09	-0.4
YKL096W	49	-11.73	-0.24	-5.28	-6.2	-48	-5.28	22.04	33.08	12.35	-1.35	11.94
YKL096W-A	50	33.48	0.67	29.14	-4.93	-36	56.34	26.79	58	77.87	81.71	17.64
YKL098W	36	-0.14	0	0.79	4.22	-19	5.12	14.92	10.05	-0.88	-5.12	-5.54
YKL099C	62	21.01	0.34	15.34	-1.49	-43	19.84	11.96	8.32	12.66	20.53	5.38
YKL100C	26	-12.64	-0.49	-8.26	-8.22	-21	-4.44	14.56	7.03	12.05	26.61	34.99
YKL103C	65	-2.73	-0.04	1.07	13.83	-21	6.14	21.63	6.55	-2.27	-4.17	0.51
YKL104C	187	65.18	0.35	1.45	-2.82	-59	32.15	10.91	12.15	-0.59	0.22	1.21
YKL106W	123	-5.72	-0.05	-11.33	4.58	-84	12.62	20.35	24.09	10.02	-0.86	-12.79
YKL110C	177	-28.34	-0.16	0	11.12	-18	6.37	13.02	17.06	8.61	-0.14	8.04
YKL112W	102	26.99	0.26	6.64	-8.54	-54	25.37	3.25	3.64	6.71	2.42	-4.25
YKL113C	150	4.54	0.03	1.07	5.76	-23	7.43	1.34	6.18	15.44	3.56	-16.71
YKL116C	120	-0.34	0	-2.43	9.79	-19	10.86	4.24	1.09	-6.13	-4.5	-4.92
YKL117W	26	19.19	0.74	22	9.92	-24	22.52	11.28	34.9	32.96	-2.32	-25.1
YKL120W	79	3.75	0.05	4.63	-1.67	-46	11.54	4.96	-16.38	-7.85	-0.38	-4.7
YKL122C	32	11.57	0.36	10.5	3.36	-24	16.55	19.65	5.51	12.19	17.06	12.32
YKL126W	191	41.08	0.22	-0.03	8.92	-35	22.92	-6.53	3.14	13.52	12.9	8.38
YKL127W	21	-1.44	-0.07	-7.09	-9.18	-20	-7.09	11.66	24.88	19.07	-5.46	4.5
YKL128C	19	2.67	0.14	20.39	24.87	-18	20.39	32.9	15.01	9.38	-12.43	-17.73
YKL130C	52	1.2	0.02	0.49	-6.01	-42	11.48	4.71	8.53	4.6	-1.03	-5.55
YKL135C	104	21.44	0.21	3.73	16.49	-23	17.89	0.27	-6.34	5.86	14.32	8.88
YKL137W	54	-12.3	-0.23	-10.03	10.6	-41	11.03	26.83	29.14	13.28	5.72	-4.76
YKL138C	100	-8.85	-0.09	4.55	5.16	-78	8.51	26.3	9.42	3.77	18.41	17.63
YKL138C-A	22	6.15	0.28	17.53	15.78	-18	20.53	6.37	14.2	28.78	23.71	16.79
YKL140W	244	26.07	0.11	-1.01	-1.86	-96	14.55	-0.48	13.64	9.58	4.76	8.79
YKL141W	24	-15.41	-0.64	-12.56	-9.34	-18	-9.87	27.74	10.3	-13.29	-2.79	2.46
YKL142W	52	-4.19	-0.08	-2.59	10.54	-24	7.97	26.89	20.23	3.38	0.16	10.09
YKL144C	63	7.3	0.12	4.38	1.39	-19	7.69	-1.14	-5.85	0.16	23.63	24.86
YKL145W	63	21.27	0.34	8.66	4.45	-39	23.17	-14.88	14.71	34.69	23.2	-13.65
YKL146W	22	0.51	0.02	2.31	6.08	-18	5.14	11.72	7.77	-4.99	-6.42	1.3
YKL148C	174	1.05	0.01	-2.1	2.02	-127	7.47	7.51	47.7	8.56	-18.8	16.39
YKL150W	146	-3.43	-0.02	2.14	5.57	-18	7.07	18.38	16.6	5.27	7.61	21.96
YKL151C	240	-26.25	-0.11	6.69	-2.16	-226	8.4	-9.5	-7.72	-8.57	-4.29	7.78
YKL152C	12	-12.19	-1.02	-11.19	N/A	N/A	N/A	22.18	17.07	-59.57	-38.12	77.14
YKL154W	77	-19.57	-0.25	11.34	3.29	-71	13.14	19.86	7.47	-3.09	-8.4	-2.9
YKL156W	11	-17.51	-1.59	-9.45	N/A	N/A	N/A	13.23	15.95	36.34	31.04	2.37
YKL157W	29	8.61	0.3	9.81	5.67	-24	18.6	10.22	11.3	1.77	5.81	7.93
YKL160W	20	0.98	0.05	-0.95	-6.06	-19	-0.95	-9.47	7.91	14.11	5.34	6.12
YKL163W	252	27.67	0.11	10.75	-2.71	-251	10.75	0.55	15.36	38.25	50.98	50.9
YKL164C	78	30.62	0.39	6.24	3.49	-24	35.63	12.61	33.39	42.7	50.98	50.88
YKL165C	43	0.94	0.02	4.16	2.79	-37	6.78	-0.36	-4.28	8.69	8.17	5.71
YKL167C	17	5.59	0.33	12.01	9.58	N/A	N/A	7.49	1.65	12.97	23.99	-5.58
YKL170W	76	15.81	0.21	2.1	1.58	-55	16.53	4.85	6.89	2.89	-3.16	8.39
YKL172W	16	-9.57	-0.6	-11.13	-11.13	N/A	N/A	-0.32	2.4	8.44	2.84	-0.61
YKL174C	59	-0.94	-0.02	2.14	3.42	-21	4.18	12.86	8.12	9.22	8.22	5.92
YKL175W	44	22.3	0.51	19.33	-6.2	-35	23.44	-10.38	-5.36	18.37	36.24	27.75
YKL176C	348	-19.85	-0.06	-1.08	1.36	-222	21.26	14.12	1.42	-9.57	25.38	58.18
YKL180W	26	17.57	0.68	27.48	41.74	-18	39.2	21.96	12.48	45.92	45.55	21.05
YKL181W	149	83.86	0.56	-0.02	1.19	-117	46.11	19.81	31.79	36.19	11.33	-2.61
YKL182W	322	40.8	0.13	1.72	20.41	-111	31.43	24.18	16.01	18.95	44.57	47.08
YKL184W	212	12.48	0.06	-1.08	-0.58	-106	19.62	12.14	10.8	12.46	9.67	9.6
YKL186C	358	73.92	0.21	-5.81	-1.43	-54	42.72	4.69	25.24	19.48	14.63	24.16
YKL190W	34	-10.18	-0.3	-10.18	-4.65	-28	2.27	-6.45	-10.36	-11.8	3.59	29.93
YKL191W	21	-15.32	-0.73	-27.35	-19.02	-18	-23.27	20.87	60.59	45.02	1.01	-7.46
YKL192C	29	24.66	0.85	27.82	30.24	-24	30.25	17.46	34.98	50.28	49.23	57.56
YKL194C	19	11.21	0.59	6.23	3.49	-18	6.23	-4.34	6.39	8.15	5.28	6.03
YKL195W	23	7.81	0.34	19.33	25.16	-19	25.03	37.31	21.21	-12.8	-2.45	21.09
YKL196C	54	0.64	0.01	-7.78	29.42	-18	21.26	23.31	-16	-12.37	11.36	8.85
YKL205W	29	-3.88	-0.13	-3.74	-5.31	-25	3.28	1.58	10.42	9.37	-2	1.18
YKL206C	38	-44	-1.16	-40.73	-12.36	-18	-17.21	5.18	7.23	-2.38	6.34	5.96
YKL207W	22	-0.36	-0.02	-26.28	-19.01	-21	-26.28	-11.56	40.62	55.99	18.85	-5.44
YKL210W	41	22.29	0.54	13.76	-8.08	-35	25.46	-14.03	24.52	20.63	6.72	24.79
YKL211C	73	8.55	0.12	1.04	10.4	-54	17.91	-2.02	-42.68	-57.79	-8.16	31.75
YKL212W	163	33.82	0.21	15.33	10.41	-114	45	-2.94	12.12	40.76	34.52	12.92
YKL213C	36	0.63	0.02	0.82	9.09	-19	4.27	1.09	3.58	10.37	3.29	2.28
YKL214C	57	20.87	0.37	6.34	-2.82	-30	18.63	-6.58	-0.91	5.84	5.42	-3.97
YKL216W	31	5.71	0.18	5.71	11.89	-29	7.07	11.23	27.31	21.5	21.81	20.75
YKR001C	55	-6.61	-0.12	-8.32	-2.27	-37	10.28	11.15	19.08	12.02	-0.43	5.35
YKR003W	88	-2.14	-0.02	-1.24	-8.78	-50	12.09	-2.37	-1.73	9.33	18.12	19.13
YKR007W	10	2.29	0.23	22.03	N/A	N/A	N/A	24.28	14.04	-5.26	-14.92	7.71
YKR013W	52	-12.59	-0.24	-0.71	-14.85	-47	3.47	26.69	37.74	7.85	39.24	74.38
YKR014C	133	6.5	0.05	4.05	-4.77	-51	10.02	16.28	36.84	19.58	-14.69	-4.69
YKR018C	53	5.62	0.11	9.58	6.18	-52	9.58	15.3	10.81	-9.78	-7.9	6.37
YKR025W	33	6.92	0.21	6.92	9.32	-26	10.81	7.55	1.82	13.66	21.91	5.28
YKR026C	87	-12.13	-0.14	2.37	-6.39	-52	8.5	27.64	7.28	-18.88	-2.27	16.44
YKR028W	119	0.83	0.01	1.21	1.33	-85	5.16	10.27	8.52	12.39	6.42	-0.42
YKR030W	28	9.06	0.32	9.2	11.21	-20	12.55	2.91	1.28	2.55	5.62	7.46
YKR035W-A	19	9.49	0.5	10.7	8.7	-18	10.7	2.55	7.89	5.76	6.47	11.74
YKR038C	305	7.58	0.02	0	-5.26	-222	22.42	-0.1	11.82	8.57	5.18	-4.75
YKR042W	197	221.09	1.12	31.64	36.42	-150	63.98	21.99	44.59	100.75	109.91	85.85
YKR043C	30	2.29	0.08	-0.19	-4.01	-23	7.86	13.09	23.62	22.55	-0.76	14.58
YKR044W	67	-3.28	-0.05	-0.62	-6.82	-53	2.94	-20.79	-15.49	1.75	-1.61	3.12
YKR045C	4	1.07	0.27	14.74	N/A	N/A	N/A	13.67	11.96	0.74	-1.78	-4.4
YKR048C	15	1.84	0.12	11.58	N/A	N/A	N/A	0.15	-3.36	19.24	36.16	26.69
YKR049C	10	-1.12	-0.11	10.95	N/A	N/A	N/A	20.93	-7.04	18.38	42.19	1.31
YKR051W	118	35.96	0.3	4.49	0.7	-56	22.73	-2.53	5.41	5.41	-3.76	2.94
YKR052C	73	6.55	0.09	0.45	6.05	-26	8.36	4.1	4.67	-7.2	-2.53	14.42
YKR056W	246	-15.62	-0.06	-7.72	0	-176	3.83	0	0	0	0	0
YKR057W	34	6.65	0.2	10.17	-5.26	-32	12.25	7.59	16.32	-3.98	7.07	12.99
YKR059W	20	5.56	0.28	6.23	-1.54	-19	6.23	29.18	42.12	40.65	51.64	26.01
YKR062W	55	25.24	0.46	13.4	-15.62	-43	26.4	-17.75	0.74	0.88	14.21	25.35
YKR065C	14	12.43	0.89	39.1	N/A	N/A	N/A	46.08	12.72	-7.69	-6.8	8.97
YKR066C	21	3.14	0.15	7.26	11.02	-18	11.16	7.33	-9.74	-7.13	19.84	30.13
YKR068C	43	-0.75	-0.02	9.27	-0.71	-40	9.52	6.38	-2.45	2.88	-0.02	3.87
YKR070W	62	-26.81	-0.43	0	-26.4	-44	0.28	13.98	6.67	-2.49	-3.16	-9.64
YKR071C	49	22.57	0.46	18.72	13.86	-46	20.81	13.38	5.64	15.26	16.07	31.02
YKR074W	32	6.69	0.21	6.69	-1.1	-22	17.76	-21.22	-6.38	-6.1	-7.31	16.81
YKR079C	18	-3.4	-0.19	-4.15	-3.75	N/A	N/A	13.17	18.16	5.88	-6.45	-9.45
YKR080W	152	67.4	0.44	8.99	-7.5	-47	35.36	-6.04	0	14.7	-5.78	-19.38
YKR081C	42	4.29	0.1	1.08	14.01	-19	13.93	21.74	6.9	-14.06	-9.88	8.75
YKR082W	50	-0.94	-0.02	-1.22	2.42	-35	2.85	0.75	-1.94	-4.43	-0.4	7.76
YKR084C	25	14.03	0.56	16.27	5.5	-24	16.27	8.87	11.1	2.7	0.42	-11.8
YKR085C	9	0.48	0.05	-12.79	N/A	N/A	N/A	-4.54	13.78	18.56	15.21	8.51
YKR087C	24	-3.79	-0.16	-2.91	-2.04	-18	-1.24	0.39	1.01	-1.04	0.23	1.73
YKR088C	20	6.84	0.34	14.22	17.06	-18	14.82	10.92	7.45	3.1	19.08	11.27
YKR089C	62	8.96	0.14	4.88	-3.55	-58	8.69	0.55	1.86	-5.69	-3.38	4.56
YKR092C	31	11.04	0.36	11.04	-2.91	-30	11.04	1.26	-1.58	0	-2.91	7.07
YKR093W	75	2.96	0.04	-2.52	18.37	-33	7.22	25.44	13.96	13.72	15.04	30.34
YKR094C	19	-26.24	-1.38	-35.8	-25.41	-18	-35.8	19.49	38.18	44.14	34.34	42.79
YKR095W-A	39	5.94	0.15	5.09	13.11	-18	6.89	25.18	9.52	-5.37	5.76	5.06
YKR100C	277	-1.66	-0.01	11.26	-1.21	-273	15.42	-4.07	-7.77	4.45	3.76	1.76
YLL001W	30	-2.4	-0.08	-2.4	-5.07	-29	-2.4	12.26	18.74	6.4	-0.41	5.25
YLL006W	40	-3.69	-0.09	-4.76	9.14	-21	10.21	0.55	-4.31	3.62	-7.78	9.86
YLL008W	28	-6.57	-0.23	-7.5	-6.43	-21	-6.43	0.92	8.68	-9.27	-12.78	7.41
YLL009C	35	14.79	0.42	9.82	23.56	-18	22.53	12.23	-0.26	7.63	0.27	-5.56
YLL010C	244	83.29	0.34	12.7	6.51	-63	27.68	11.43	20.1	16.85	16.83	22.96
YLL012W	129	-1.05	-0.01	-2.43	8.22	-63	7.02	21.79	-8.78	-15.18	-3.59	-11.87
YLL013C	273	46.23	0.17	2.14	-0.63	-74	26.52	4.56	-5.55	0.09	10.19	6.05
YLL014W	21	-25.43	-1.21	-13.74	-11.16	-18	-12.65	9.25	18.87	-23.43	-40.13	2.35
YLL018C	28	-4.93	-0.18	-0.94	16.73	-18	12.48	11.15	2.76	9.84	22.42	10.41
YLL018C-A	41	-14.7	-0.36	-5.96	-15.83	-40	-5.96	3.82	7.55	6.73	2.11	1.18
YLL019C	458	23.35	0.05	0.93	7.21	-35	20.83	4.84	1.14	-1.01	8.41	4.3
YLL022C	97	-1.34	-0.01	2.14	0.47	-96	2.14	2.67	5.99	2.39	-8.86	-3.16
YLL023C	37	-12.95	-0.35	-12.01	10.06	-18	1.58	18.95	14.74	-4.71	1.43	5.07
YLL024C	25	28.51	1.14	21.47	-4.8	-23	23.23	12.14	40.58	65.04	57.67	29.63
YLL026W	41	21.69	0.53	17.62	19.74	-33	22.93	14.41	9.01	18.26	14.5	13.02
YLL027W	81	14.05	0.17	-1.09	18.96	-18	18.19	8.25	-0.39	0.32	-1.75	-3.55
YLL028W	108	10.85	0.1	10.72	12.2	-24	13	6.56	-2.98	17.98	38.5	36.41
YLL029W	129	17.93	0.14	6.98	5.01	-55	8.73	6.79	6.65	9.01	5.76	7.75
YLL031C	135	11.1	0.08	0	23.79	-25	20.19	-1.5	-7.66	-0.48	9.34	11.17
YLL035W	164	24.03	0.15	4.88	16.88	-114	16.31	4.72	6.39	7.61	7.9	6.68
YLL036C	46	-2.02	-0.04	-2.3	6.19	-18	6.32	6.36	10.28	18.74	7.33	8.09
YLL039C	100	31.64	0.32	-1.79	2.81	-65	26.13	22.28	24.94	8.09	13.48	14.13
YLL041C	54	-16.34	-0.3	-4.77	-8.35	-51	-3.24	12.51	28.92	25.78	8.3	7.82
YLL043W	79	4.64	0.06	-6.05	-5.76	-42	21.68	11.24	24.98	24.14	11.1	4.74
YLL045C	26	-4.95	-0.19	-0.4	-21.83	-24	0.49	8.23	19.78	17.37	46.17	34.69
YLL048C	180	46.01	0.26	-10.38	41.9	-18	33.68	33.99	4.39	-5.19	5	6.05
YLL049W	31	2.78	0.09	2.78	5.15	-22	4.28	-4.24	-8.9	5.02	0.53	0.79
YLL050C	14	-24.88	-1.78	-4.12	N/A	N/A	N/A	38.54	73.62	70.86	21.52	7.81
YLL051C	73	11.38	0.16	-3.36	9.54	-23	16.24	-3.68	-1.54	-0.02	-7.04	-0.5
YLL058W	41	2.41	0.06	3.34	0.28	-40	3.34	12.19	14.79	5.5	-3.69	5.69
YLL061W	13	1.94	0.15	-3.61	N/A	N/A	N/A	-18.95	1.35	-3.92	-23.5	-36.81
YLR002C	53	-0.31	-0.01	1.45	-1.95	-48	1.59	6	17.79	5.41	-11.55	-18.67
YLR003C	39	27.28	0.7	26.92	7.55	-34	32.33	9.85	12.5	18.69	13.45	7.86
YLR005W	33	9.33	0.28	9.33	12.18	-21	12.55	2.55	3.29	10.76	1.86	-5.97
YLR007W	2	-1.9	-0.95	7.75	N/A	N/A	N/A	11.65	4.46	3.62	14.68	8.02
YLR008C	85	36.62	0.43	-2.71	29.46	-20	40.14	-3.77	-12.58	14.05	6.17	-6.86
YLR009W	180	45.69	0.25	10.34	-5.55	-75	19.42	-5.62	-10.47	-6.18	35.15	24.81
YLR016C	151	5.6	0.04	0	8.65	-21	9.58	9.73	9.22	8.44	2.99	6
YLR017W	37	-1.22	-0.03	0.28	7.64	-19	10.52	8.15	13.4	17.98	20.87	8.05
YLR018C	82	11.45	0.14	2.17	28.11	-20	22.08	12.88	-1.27	10.52	26.62	45.45
YLR019W	207	38.54	0.19	2.58	17.52	-56	23.35	-0.62	7.51	16.66	15.69	21.49
YLR020C	51	6.22	0.12	9.95	-8.59	-37	17.36	-8.92	-0.84	2.31	4.1	12.6
YLR021W	42	-0.93	-0.02	0	-2.29	-41	0	-0.2	-1.84	-6.78	-4.85	5.37
YLR022C	12	0	0	1.46	N/A	N/A	N/A	6.54	1.35	-0.14	10.68	9.56
YLR023C	113	-0.15	0	10.8	8.03	-89	16.64	12.89	-0.33	4.48	5.32	3.06
YLR027C	27	-1.96	-0.07	-7.9	11.5	-18	6.74	28.02	44.45	18.71	-12.74	18.66
YLR028C	192	31.09	0.16	4.71	20.28	-77	21.55	42.13	14.2	-17.2	9.36	21.29
YLR029C	27	6.42	0.24	-2.28	-11.26	-19	6.21	12.2	7.3	-6.21	28.67	34.5
YLR034C	147	33.29	0.23	-12.53	3.99	-92	20.41	3.26	14.26	36.51	19.2	-6.12
YLR038C	80	-2.17	-0.03	-5.4	17.92	-18	20.67	53.86	60.45	50.25	3.86	-14.14
YLR043C	35	-40.94	-1.17	-28.39	-29.64	-34	-28.39	-25.67	-36.58	-28.35	12.42	68.84
YLR044C	33	12.09	0.37	15.87	2.89	-32	15.87	7.22	-34.96	-33.67	16.08	51.9
YLR046C	422	-1.97	0	1.49	30.03	-18	23	22.11	11.22	6.82	-2.41	1.04
YLR048W	201	17.83	0.09	0	1.73	-80	20.91	11.59	3.49	9.18	29.39	8.22
YLR049C	33	5.51	0.17	5.51	0.53	-28	9.01	1.77	10.76	12.5	-2.36	-9.8
YLR052W	33	-6.44	-0.2	-2.64	-12.88	-32	-2.64	2.49	3.59	13.77	17.32	8.07
YLR056W	63	13.01	0.21	23.79	-0.83	-59	27.56	-3.03	1.4	-1.4	17.74	35.6
YLR058C	29	9.89	0.34	10.03	32.22	-18	27.86	54.04	34.81	15.04	7.74	0.48
YLR059C	11	-11.76	-1.07	-17.98	N/A	N/A	N/A	-0.29	21.08	28.35	7.46	-11.61
YLR060W	188	12.75	0.07	0.17	36.04	-19	27.47	31.64	39.25	30.54	28.32	21.91
YLR061W	21	-10.83	-0.52	3.6	12.92	-18	8.38	23.3	-24.93	-17.55	-22.83	12.83
YLR064W	43	-19.07	-0.44	-2.95	7.12	-18	2.63	37.47	25.25	13.73	-0.06	5.49
YLR065C	22	4.86	0.22	16.49	17.3	-20	17.91	3.45	-4.1	7.37	1.66	-2.22
YLR066W	53	11.44	0.22	-0.46	22.91	-18	25.81	43.39	37.39	-0.39	-20.22	8.9
YLR069C	17	1.21	0.07	2.28	2.28	N/A	N/A	3.35	-1.12	-4.63	3.05	11.26
YLR073C	58	25.86	0.45	11.41	24.31	-20	22.91	29.03	25.79	-0.08	3.94	13.37
YLR074C	26	10.08	0.39	15.78	24.78	-22	18.18	26.77	-5.93	-8.69	18.31	12.61
YLR075W	29	-5.94	-0.2	1.48	-8.87	-24	14.27	2.19	18.59	58.61	62.96	13.46
YLR078C	55	0.45	0.01	-1.08	8.33	-31	6.69	7.92	6.88	-3.41	-5.67	2.47
YLR083C	78	14.77	0.19	-10.2	65.3	-20	65.33	44.44	8.13	8.16	27.47	24.54
YLR084C	32	7.11	0.22	7.11	-5.84	-31	7.11	2.13	11.09	14.47	14.34	10.49
YLR085C	12	-2.36	-0.2	3.13	N/A	N/A	N/A	11.4	5.11	0.53	1.14	1.62
YLR088W	42	-0.36	-0.01	-2.17	9.45	-31	10.38	16.08	16.66	3.5	3.8	25.47
YLR089C	318	44.1	0.14	2.28	24.58	-19	19.45	7.15	-2.08	10.84	9.53	15.64
YLR090W	65	-6.02	-0.09	-4.29	-1.86	-58	-0.8	-1.27	-3.14	-3.23	-1.05	-0.41
YLR091W	73	5.07	0.07	-0.01	-0.98	-41	7.37	4.12	11.89	11.28	-1.84	10.54
YLR093C	73	-20.56	-0.28	-4.01	-5.12	-63	-3.51	-9.7	-6.66	17.58	38.24	6.15
YLR099C	85	20.38	0.24	2.77	-3.57	-53	17.63	-44.57	-63.9	-23.93	7.43	-7.15
YLR099W-A	20	-17.22	-0.86	-31.2	-25.02	-18	-29.3	13.57	36.48	-7.98	-20.48	17.93
YLR100W	33	3.75	0.11	6.68	26.06	-18	21.13	26.59	26.55	40.8	40.73	21.16
YLR104W	43	0.67	0.02	3.35	-2.23	-42	3.35	-1.17	2.28	3.69	-5.57	5.36
YLR109W	30	4.42	0.15	5.06	6.23	-20	11.41	42.67	98.43	92.37	-10.67	-8.3
YLR110C	46	-30.13	-0.66	15.87	-15.63	-45	15.87	88.2	89.96	42.26	39.09	49.92
YLR113W	324	135.76	0.42	13.94	9.58	-41	58.67	-15.19	-1.5	31.15	40.47	2.03
YLR118C	36	-16.54	-0.46	-13.31	-10.19	-21	-5.43	-11.65	-13.21	6.68	11.39	21.49
YLR120C	151	32.77	0.22	8.57	9.3	-33	32.04	-20.68	-2.4	15.39	12.65	-5.49
YLR121C	184	8.76	0.05	-0.79	-1.51	-91	6.38	-1.48	2.15	4.18	5.35	3.12
YLR126C	81	-0.29	0	-0.14	0.35	-70	1.07	5.14	-12.61	-25.7	-4.92	7.96
YLR129W	103	-7.82	-0.08	2.28	-1.28	-53	7.55	6.82	8.25	5.85	7.51	11.38
YLR130C	145	39.53	0.27	9.48	4.16	-124	36.41	7.17	11.24	-16.79	-78.34	-38.45
YLR134W	139	0.27	0	-2.05	5.38	-111	8	10.04	-8.02	-4.5	7.92	10.07
YLR138W	165	-10.76	-0.07	-2.02	-16.64	-36	14.83	2.57	8.13	9.68	10.32	10.96
YLR144C	8	0	0	1.78	N/A	N/A	N/A	1.08	-0.76	1.32	6.55	15.43
YLR146C	34	21.77	0.64	23.18	15.39	-31	30.03	7.29	-29.19	-26.58	23.65	19.56
YLR146W-A	11	-3.05	-0.28	-11.37	N/A	N/A	N/A	-25.68	-35.82	6.86	1.42	-4.73
YLR147C	15	6.82	0.45	13.48	N/A	N/A	N/A	11.07	10.95	5.05	11.06	19.86
YLR153C	57	24	0.42	21.06	9.06	-44	24.13	7.12	-5.08	1.53	-0.34	9.26
YLR154C	62	-22.24	-0.36	-11.66	-34.87	-39	9.87	-27.39	-6.93	13.2	10.38	9.23
YLR163C	49	-0.57	-0.01	-7.5	10.16	-24	8.27	15.25	2.2	-3.23	11.91	7.15
YLR164W	141	27.26	0.19	3.41	13.5	-76	21.62	9.5	-11.83	-25.79	-5.75	13.76
YLR167W	60	-53.07	-0.88	-24.84	-25.98	-56	-18.88	-7.1	-0.64	-3.67	16.18	40.84
YLR172C	27	1.49	0.06	2.56	4.09	-23	5.63	3.68	-0.86	2.94	2.74	-3.35
YLR175W	19	31.05	1.63	44.01	43.23	-18	44.01	20.1	6.98	23.83	41	21.08
YLR177W	37	-18.57	-0.5	-19.77	-4.6	-18	-3.44	13.23	9.15	0.72	0.82	4.05
YLR178C	53	4.18	0.08	-5.87	15.26	-18	18.02	6.29	15.25	20.59	10.43	-11.53
YLR179C	36	2.99	0.08	3.41	8.2	-21	9.86	8.47	5.76	29.98	55.68	51.51
YLR180W	58	21.4	0.37	36.08	10.71	-57	36.08	26.57	15.28	16.83	36.61	66.02
YLR183C	47	-3.01	-0.06	0.01	5.47	-45	2.49	14.2	6.49	11.49	5.61	-1.66
YLR185W	20	-32.96	-1.65	-27.37	-23.04	-18	-24.13	28.14	37.95	8.53	17.55	24.81
YLR186W	47	15.1	0.32	19.07	12.85	-45	22.27	17.89	-7.74	-22.07	-10.24	9.44
YLR188W	75	6.54	0.09	3.51	14.06	-21	6.95	9.39	-0.98	2.83	0.96	6.69
YLR190W	51	5.9	0.12	-0.05	6.32	-30	7.76	5.81	16.78	21.23	11.2	1.86
YLR192C	63	-1.92	-0.03	7.91	10.43	-62	7.91	18.83	6.84	4.01	6.01	16.58
YLR193C	54	11.77	0.22	4.23	0.75	-41	13.68	-3.62	5	3.02	-0.93	1.75
YLR194C	124	6.4	0.05	9.52	3.23	-119	15.29	3.01	-10.57	0.37	20.74	25.84
YLR195C	19	0.28	0.01	3.02	5.76	-18	3.02	1.93	0.86	-0.13	-7.86	10.06
YLR196W	75	-0.66	-0.01	2.06	-2.13	-68	6.3	9.22	10.25	4.95	4.69	5.78
YLR197W	39	24.22	0.62	31.46	-8.52	-38	31.46	5.73	20.05	7.1	22.23	51.25
YLR199C	39	5.54	0.14	3.14	-2.74	-21	4.58	19.72	12.32	-1.31	-1.15	-2.73
YLR200W	34	3.98	0.12	4.91	-2.04	-24	7.19	0.21	5.35	4.84	2.52	-1.05
YLR201C	50	3.03	0.06	1.21	6.06	-19	5.03	12.83	7.02	5.94	18.59	13.09
YLR203C	66	31.77	0.48	10.05	19.2	-28	25.94	30.58	23.1	14.79	22.1	34.12
YLR204W	32	16.86	0.53	15.79	4.59	-28	21.01	-9.7	7.27	-4.66	-6.88	9.1
YLR206W	106	21.54	0.2	7.51	9.44	-35	11.62	16.49	14.99	17.69	18.25	18.89
YLR207W	45	14.86	0.33	13.94	3.02	-36	16.22	6.69	-11.16	-16.68	1.43	3.24
YLR208W	118	41.84	0.35	-3.96	13.39	-86	47.01	17.11	-0.55	15.26	7.67	-0.64
YLR209C	21	8.72	0.42	7.14	-0.48	-20	7.14	-5.77	2.98	10.09	6.49	4.14
YLR212C	160	-6.96	-0.04	0	-9.17	-51	3.52	-8.88	10.48	22.46	12.68	5.33
YLR214W	132	34.5	0.26	0.36	0.32	-47	17.85	-1.89	-2.83	3.99	12.96	10
YLR216C	34	27.44	0.81	33.19	-19.41	-33	33.19	-16.09	3.52	18.86	12.19	-16.35
YLR219W	197	14.22	0.07	5.15	2.14	-189	7.15	7.02	11.3	2.06	-2.87	-2.06
YLR220W	120	37.26	0.31	-14.57	8.9	-33	55.2	-23.81	-22.63	0.79	0.67	-0.63
YLR221C	40	7.79	0.19	4.78	6.26	-21	6.95	4.81	-0.4	-34.22	-28.49	-2.05
YLR222C	22	0.89	0.04	0.74	3.34	-18	2.41	-5.65	-7.29	2.55	-2.71	-0.56
YLR224W	133	-9.73	-0.07	-2.18	17.56	-92	19.07	12.69	7.88	-5.05	-4.14	9.65
YLR231C	29	-2.89	-0.1	-0.63	16.09	-18	11.41	12.23	-3.58	-22.89	-5.17	26.13
YLR243W	81	-0.86	-0.01	7.06	20.28	-18	19.68	17.46	7.44	2.82	-5	-13.15
YLR244C	130	14.8	0.11	0	16.46	-18	21.71	12.35	10.4	30.27	22.36	28.71
YLR248W	133	15.6	0.12	6.06	-11.38	-66	16.55	-5.16	14.62	17.8	7.67	6.14
YLR249W	43	-79.48	-1.85	-31.17	-54.41	-42	-31.17	20.66	50.9	69.54	67.19	25.35
YLR250W	40	3.73	0.09	11.08	-17.71	-39	11.08	-7.77	1.79	9.55	13.82	19.83
YLR253W	97	4.06	0.04	0.78	6.69	-18	8.36	9.53	2.36	-8.44	5.72	21.54
YLR257W	182	32.79	0.18	1.71	4.08	-103	33.78	14.3	18.33	10.49	2.75	3.14
YLR258W	68	-3.96	-0.06	2.64	3.92	-22	6.18	5.94	1.2	9.43	10.12	13.59
YLR259C	37	10.57	0.29	8.65	16.38	-29	9.31	42.93	41.11	44.19	47.08	13.79
YLR262C-A	17	24.52	1.44	39.93	41.72	N/A	N/A	-1.73	-18.94	9.76	1.58	-8.28
YLR264W	14	-7.88	-0.56	28.61	N/A	N/A	N/A	44.51	14.4	26.7	47.78	56.25
YLR268W	49	28.43	0.58	8.8	15.58	-27	34.94	-3.72	-18.47	-5.06	12.82	-4.39
YLR274W	30	0.67	0.02	0.67	-4.32	-26	1.6	-3.02	-4.66	-5.04	-12.31	-23.51
YLR276C	109	21.59	0.2	7.95	18.27	-28	17.01	14.57	2.1	5.16	11.38	9.47
YLR285W	36	0.19	0.01	1.12	-1.24	-24	3.86	2.84	7.64	9.06	16.53	25.51
YLR286C	233	58.56	0.25	-48.36	19.93	-197	37.67	40.69	60.03	71.06	72.94	36.81
YLR287C	69	-17.12	-0.25	-12.44	4.63	-19	2.29	2.69	4.2	10.92	-1.24	-17.61
YLR287C-A	42	-12.1	-0.29	-8.26	-38.49	-36	-1.1	8.64	36.6	14.42	-2.24	-4.1
YLR290C	12	-1.76	-0.15	-3.2	N/A	N/A	N/A	-0.27	-13.95	-23.65	-10.54	3.34
YLR291C	27	31.48	1.17	41.41	51.8	-18	55.92	18.86	-4.49	2.66	33.87	23.89
YLR292C	22	0.22	0.01	-10.37	-6.8	-18	-6.45	-21.3	5.33	27.35	36.8	19.41
YLR293C	43	-20.03	-0.47	-15.36	10.26	-18	4.42	34.86	30.93	25.34	-15.61	-9.16
YLR295C	37	7.37	0.2	10.6	29.14	-18	23.79	33.37	14.54	22.6	23.37	-11.18
YLR300W	106	64.33	0.61	19.95	33.59	-22	52.22	49.38	30.08	33.82	59.06	59.38
YLR301W	40	4.42	0.11	0.27	10	-19	17.41	4.37	13.68	21.36	26.88	38.79
YLR304C	41	-10.63	-0.26	-13.14	7.67	-22	9.35	44.82	33.91	35.23	58.17	32.74
YLR305C	15	-2.98	-0.2	7.45	N/A	N/A	N/A	0.93	-1.34	8.29	4.81	18.75
YLR310C	88	-0.83	-0.01	-5.05	0.77	-31	4.65	3.34	2.98	1.35	2.45	4.55
YLR312W-A	32	7.15	0.22	7.15	0.37	-31	7.15	-6.91	8.27	17.36	-0.94	3.63
YLR314C	72	30.37	0.42	5.79	9.73	-49	36.69	19.42	18.54	10.31	7.71	18.65
YLR324W	70	13.07	0.19	3.62	13.42	-36	13.74	21.76	11.78	7.21	11.77	11.5
YLR325C	24	-36.28	-1.51	-10.04	-34.01	-23	-10.04	7.05	39.5	8.1	-24.24	-30.92
YLR328W	194	3.36	0.02	-7.59	-7.14	-50	12.58	1.08	16.46	14.84	4.49	3.26
YLR330W	14	2.57	0.18	2.99	N/A	N/A	N/A	3.61	7.6	-7.75	-3.09	8.88
YLR332W	424	122.13	0.29	-4.29	6.17	-184	45.19	3.87	12.81	14.44	15.38	14.47
YLR333C	475	8.28	0.02	5.27	-15.08	-297	14.42	24.01	13.03	4.08	1.85	4.63
YLR335W	15	-6.52	-0.43	0.76	N/A	N/A	N/A	-9.73	-21.41	3.2	13.51	-3.09
YLR340W	63	11.28	0.18	21.86	19.79	-57	49.16	23.89	-2.16	36.6	37.21	13.52
YLR342W	259	63.07	0.24	6.88	39.5	-18	41.27	45.82	20.86	28.46	46.52	29.39
YLR344W	38	-67.64	-1.78	-45.46	-35.15	-19	-43.71	24.89	6.8	-13.12	13.14	36.92
YLR347C	149	-43.31	-0.29	2.36	-13.47	-76	14.45	22.95	12.09	-10.93	-1.67	0.36
YLR350W	43	-1.78	-0.04	-8.84	10.03	-20	3.94	4.26	-3.43	1.05	6.61	23.83
YLR351C	8	4.6	0.58	5.59	N/A	N/A	N/A	-1.23	4.8	13.76	18.99	11.43
YLR353W	53	5.49	0.1	0.14	8.22	-20	7.62	-8.6	-15.42	-0.55	9.45	11.09
YLR354C	43	-30.2	-0.7	8.44	-23.83	-42	8.44	7.89	31.53	44.64	26.27	26.89
YLR355C	63	60.59	0.96	35.72	11.48	-51	54.33	17.17	27.08	34.42	51.35	63.84
YLR356W	52	-3.49	-0.07	4.97	-8.87	-48	6.21	6.32	7.85	-1.38	2.12	8.05
YLR359W	60	36.96	0.62	35.56	0.67	-44	40.5	17.21	8.13	32.83	22.59	19.42
YLR361C	53	-2.26	-0.04	-0.79	-3.84	-36	1.94	-0.82	3.69	2.45	-3.5	8.63
YLR363W-A	59	-29.85	-0.51	0	-23.81	-52	0.28	-2.93	17.63	12.84	4.64	17.98
YLR367W	565	7.22	0.01	-1.21	-16.75	-278	20.52	30.95	21.62	13.7	12.56	11.31
YLR370C	32	18.1	0.57	21.15	14.56	-21	22.92	18.8	18.26	27.6	25.99	11.35
YLR372W	129	145.35	1.13	15.34	39.33	-80	62.43	38.62	61.1	58.89	23.49	19.12
YLR378C	207	123.58	0.6	-0.75	-4.56	-130	49.63	22.84	24.84	18.87	14.61	28.44
YLR380W	82	17.65	0.22	12.88	-12.61	-68	23.95	-2.7	4.27	10.3	18.48	5.06
YLR384C	61	-7.11	-0.12	-3.1	1.07	-18	1.07	-5.47	-4.32	-12.26	-9.68	5.87
YLR387C	69	12.84	0.19	12.72	2.84	-68	12.72	22.33	26.61	7.78	10.71	12.71
YLR388W	495	6.59	0.01	-0.51	9.84	-252	18.76	-13.51	-22.71	-30.32	21.24	60.53
YLR389C	93	-5.95	-0.06	-4.72	5.62	-21	6.69	4.54	0.14	6.13	11.74	5.72
YLR390W	202	1.23	0.01	-7.6	9.53	-18	13.67	10.31	8.84	0.62	-5.52	5.18
YLR390W-A	40	27.73	0.69	38.28	29.53	-39	38.28	19.24	18.79	40.23	50.13	42.08
YLR395C	54	0.67	0.01	-2.35	9.48	-24	8.39	5.61	10.3	19.97	8.31	20.62
YLR399C	32	5.59	0.17	11.21	-0.83	-31	11.21	10.31	13.87	8.07	8.67	13.49
YLR401C	45	3.55	0.08	-0.65	12.85	-21	12.85	7.58	10.23	14.5	14.34	19.19
YLR403W	334	40.29	0.12	23	7.43	-231	23.4	18.64	19.52	4.6	13.07	20.42
YLR404W	39	1.76	0.05	-1.45	5.45	-18	4.65	6.38	1.45	-0.69	2.42	1.35
YLR406C	28	-0.64	-0.02	6.69	4.56	-27	6.69	-12.64	29.64	24.79	-11.45	-0.1
YLR407W	246	-29.27	-0.12	-0.93	-0.31	-93	9.58	2.74	3.48	2.41	5.94	0.15
YLR409C	29	15.53	0.54	15.53	6.69	-27	16.46	1.96	4.24	3.35	-4.3	-1.89
YLR410W	47	6.56	0.14	3.72	4.84	-34	8.32	6.1	8.32	3.09	0.71	5.19
YLR412W	18	7.25	0.4	1.43	2.36	N/A	N/A	-5.08	1.13	11.22	20.02	13.1
YLR413W	46	0.51	0.01	2.44	-20.2	-22	10.56	4.31	47.18	21.93	-5.49	19.19
YLR414C	102	19.17	0.19	23.56	-8.63	-98	26.53	10.11	1.46	-18.38	-11.28	10.37
YLR418C	44	2.04	0.05	-1.22	13.47	-18	8.31	9.78	4.1	0.98	1.68	12.56
YLR420W	26	-4.68	-0.18	-8.83	-15.57	-25	-8.83	-9.87	-0.06	17.25	10.61	4.12
YLR421C	31	-16.27	-0.52	-16.27	-20.89	-30	-16.27	-7.64	-5.13	1.8	-2.57	9.82
YLR426W	47	4.33	0.09	-0.38	5.69	-18	7.79	0.43	-0.1	-1.81	2.01	0.32
YLR427W	96	-5.35	-0.06	-5.52	1.07	-61	7.08	2.76	7.04	-3.05	-5.19	3.48
YLR432W	116	37.77	0.33	-30.55	10.15	-73	68.23	13.83	13.85	13.98	35.96	29.98
YLR437C	95	12.29	0.13	1.21	8.25	-60	11.58	7.63	5.56	19.29	18.61	27.4
YLR438C-A	51	30.63	0.6	19.46	5.55	-37	28.16	-4.13	1.1	25.83	32.71	13.46
YLR439W	50	2.14	0.04	2.14	-0.19	-49	2.14	5.57	17.07	15.69	9.6	11.64
YLR441C	22	8.92	0.41	25.86	19.02	-21	25.86	20.68	23.43	5.11	16.29	24.56
YLR447C	44	12.06	0.27	3.71	17.03	-24	28.51	12.01	12.33	5.35	1.34	20.19
YLR448W	65	-23.44	-0.36	4.23	-10.34	-64	4.23	8.83	11.59	4.18	2.17	8.59
YLR449W	28	-11.31	-0.4	-8.83	-1.21	-25	-5.48	11.09	9.61	11.09	12.12	23.24
YLR450W	157	17.47	0.11	4.46	6.14	-30	18.1	1.85	0.22	-5.81	4.73	19.38
YLR452C	77	24.6	0.32	4.99	10.17	-25	17.28	-0.38	3.2	5.83	16.73	12.07
YLR459W	25	-35.56	-1.42	-30.12	-10.63	-18	-17.18	10.94	-6.32	0.3	9.48	7.37
YML001W	85	17.64	0.21	-6.26	5.14	-45	24.62	-3.16	-10.15	3.4	15.99	24.17
YML004C	86	8.13	0.09	-1.5	15.4	-18	21.5	19.61	0.38	-11.28	2.38	-14.31
YML008C	36	-3.83	-0.11	0.97	12.16	-19	8.95	-8.49	-4.05	17.09	8.49	12.59
YML009C	31	10.92	0.35	10.92	8.22	-18	15.72	0.61	-20.91	-28.42	-11.39	2.75
YML010W	42	6.83	0.16	6.25	-1.31	-37	10.06	-15.32	0.26	22.1	27.67	31.26
YML011C	35	1.84	0.05	1.84	4.55	-19	5.15	1.95	-1.84	-24.14	-16.96	8.71
YML012W	48	-19.64	-0.41	1.14	-0.55	-38	12.07	11.78	13.71	43.31	18.36	35.64
YML014W	19	1.02	0.05	9.97	13.9	-18	9.97	19.98	15.27	2.35	3.17	11.38
YML016C	251	11.42	0.05	5.2	9.31	-54	8.65	8.13	-4.13	2.47	13.1	16.22
YML018C	151	32.69	0.22	-3.55	30.31	-27	26.84	5.83	-16.12	2.42	20.55	24.48
YML019W	33	15.38	0.47	11.61	11.16	-29	22.88	2.09	14.72	26.26	30.99	54.52
YML022W	39	-9.25	-0.24	-10.67	7.87	-18	-0.18	9.55	-5.82	6.94	24.81	26.86
YML023C	48	16.31	0.34	8.79	15.84	-34	13.83	-2.91	-5.37	1.77	-5.81	0.43
YML024W	23	10.03	0.44	13.52	16.42	-20	13.89	50.33	21.98	-15.2	23.59	37.16
YML026C	19	-28.34	-1.49	-12.21	-3.57	-18	-12.21	-4.12	-1.79	1.33	8.4	5.71
YML027W	103	20.83	0.2	5.49	1.15	-50	16.18	5.89	5.18	9.38	17.61	21.05
YML028W	32	16.83	0.53	17.37	-1.27	-31	17.37	1.82	5.75	48.49	72.58	48.65
YML029W	100	2.44	0.02	7.75	7.24	-21	10.71	9.79	6.99	1.29	1.85	1.71
YML032C	37	10.81	0.29	7.47	10.15	-27	16.06	-4.33	-5.06	8.22	7.43	-0.84
YML035C	144	-16.64	-0.12	0.28	1.36	-73	0.62	-6.2	-2.01	13.68	15.2	22.21
YML036W	24	-1.17	-0.05	-0.1	2.75	-18	1.78	30.35	25.34	6.07	-8.39	-8.97
YML038C	98	29.21	0.3	20.92	7.29	-91	23.74	4.2	1.69	-5.31	2.8	24.51
YML048W	34	8.58	0.25	3.74	40.05	-18	30.03	22.41	6.8	20.21	10.32	-16.49
YML051W	56	40.64	0.73	11.55	44.57	-22	50.72	37.59	16.06	15.91	41.25	43.86
YML052W	34	3.48	0.1	-0.36	-16.73	-26	5.76	-7.35	16.21	14.79	10.33	22.85
YML055W	31	8.97	0.29	8.97	20.45	-18	15.66	19.1	17.87	13.82	6.63	6.83
YML056C	310	84.25	0.27	-4.29	-49.96	-270	39.79	-19.86	24.09	23.42	22.74	15.12
YML058W	30	43.89	1.46	43.95	19.71	-27	44.6	-7.6	-25.52	-22.32	2.93	1.26
YML059C	65	-8.41	-0.13	0.14	0.92	-18	4.35	-1.08	9.26	6.45	2.07	10.65
YML063W	28	-24.88	-0.89	-24.22	15.96	-18	17.28	17.75	31.56	17.26	20.82	21.53
YML064C	63	-0.34	-0.01	1.77	2.62	-43	7.56	20.21	22.59	12.85	8.3	15.63
YML067C	17	1.46	0.09	5.67	2.45	N/A	N/A	-0.06	-2.5	-9.07	-4.94	6.78
YML069W	66	-6.54	-0.1	-6.18	-2.54	-36	8.56	3.03	-1.14	-2.21	-0.53	4.11
YML070W	62	7.72	0.12	18.24	-13.01	-61	18.24	-2.08	-5.86	2.89	17.81	24.07
YML072C	158	6.75	0.04	0.42	-4.17	-111	16.42	5.23	-0.6	-3.01	6.39	10.03
YML073C	26	-44.66	-1.72	-44.68	-53.16	-20	-34.47	-41.01	2.08	11.96	9.1	0.13
YML074C	42	27.48	0.65	14.65	20.25	-33	25.29	38.53	37.21	-8.41	1.35	37.83
YML075C	82	12.05	0.15	0.12	20.52	-63	26.67	16.89	-6.34	-4.48	10.65	12.19
YML079W	20	6.02	0.3	9.64	9.47	-19	9.64	-1.15	0.52	-3.57	8.3	19.17
YML080W	126	18.25	0.14	1.45	17.24	-60	11.06	13.86	0.77	-0.86	-12.79	-0.02
YML081C-A	49	-18.56	-0.38	-16.04	-0.18	-31	-2.43	5.29	6.65	15.14	28.8	-11.4
YML081W	96	15.51	0.16	-1.22	7.12	-47	11.84	1.15	-9.44	-0.43	9.96	15.62
YML085C	32	25.13	0.79	25	5.19	-29	26.2	1.58	13.81	18.82	11.82	-4.05
YML086C	383	54.41	0.14	0	29.71	-82	29.04	17.59	8.32	42.84	51.21	28.07
YML088W	39	5.81	0.15	7.41	0.91	-36	7.54	0.45	3.29	11.32	8.78	2.75
YML092C	23	5.06	0.22	4.9	-3.02	-22	4.9	-3.81	14.31	8.29	17.27	30.14
YML096W	10	-2.42	-0.24	20.4	N/A	N/A	N/A	32.07	18.87	1.45	-1.67	9.12
YML098W	56	2.55	0.05	1.91	19.61	-18	14.25	27.89	0.81	-3.41	8.77	27.12
YML099C	18	0	0	1.07	1.07	N/A	N/A	0.14	1.38	4.53	4.96	-4.93
YML100W	50	-27.45	-0.55	-41.2	15.54	-18	15.77	9.85	10.1	13.64	21.39	22
YML101C	102	18.63	0.18	-2.43	-3.17	-40	27.79	-7.72	-9.37	-8.35	-1	-10.22
YML102W	109	-19.26	-0.18	0	-20.06	-80	1.07	-6.71	5.77	15.49	5.24	4.81
YML103C	40	2.22	0.06	0.14	5.43	-18	5.43	10.29	5.59	1.48	0.09	9.02
YML105C	21	-15.19	-0.72	-14.8	-25.26	-20	-14.8	4.75	14.3	-1.37	0.2	-6.73
YML106W	220	6.11	0.03	1.18	-9.33	-82	35.82	36.72	38.35	2.34	0.49	28.39
YML108W	63	9.4	0.15	26.96	-10.38	-61	28.03	5.95	-4.64	-4.64	1.35	-3.63
YML110C	39	-26.19	-0.67	-27.27	2.01	-32	0.73	18.5	31.73	25.98	22.47	18.46
YML113W	73	-11.44	-0.16	-0.79	1.27	-58	2.42	6.28	7.54	2.76	0.31	2.4
YML115C	47	8.29	0.18	9.65	-2.15	-46	9.65	3.02	-8.5	-10.17	10.58	24.12
YML119W	115	-0.44	0	-1.86	2.55	-95	2.28	3.97	-0.32	-2.25	-0.72	1.57
YML120C	62	27.47	0.44	5.93	2	-40	25.47	-7.53	4.78	1.56	9.8	6.71
YML121W	137	-21.35	-0.16	-0.43	-2.59	-40	9.07	-6.8	-3.51	16.47	-0.05	-14.49
YML123C	33	10.91	0.33	12.42	13.62	-18	26.83	2.14	-17.72	-1.27	14.75	27.56
YML124C	16	8.52	0.53	0.94	0.94	N/A	N/A	-8.91	0.61	8.52	15.04	22.08
YML125C	16	24.33	1.52	14.35	14.35	N/A	N/A	-17.33	-16.16	-0.22	20.28	18.24
YML127W	50	-14.99	-0.3	-13.78	-1.89	-19	-2.14	-3.13	-16.3	4.58	33.35	10.9
YML128C	111	-18.16	-0.16	0.14	-20.87	-109	1.07	1.04	8.95	7.31	5.91	1.67
YML129C	11	4.76	0.43	6.18	N/A	N/A	N/A	13.34	16.78	-1.75	-13.11	-4.89
YML130C	73	24.56	0.34	-0.55	10.67	-34	28.23	5.15	6.51	12.66	27.6	31.77
YML131W	34	14.81	0.44	14.81	13.67	-32	15.74	-11.67	-11.33	3.06	18.2	24.81
YMR002W	63	-15.99	-0.25	19.13	-14.77	-62	19.13	33.38	31.38	0.89	-6.44	30.93
YMR005W	73	25.44	0.35	-0.41	13.37	-39	26.66	17.95	23.87	17.16	9.34	6.04
YMR006C	81	38.96	0.48	6.69	10.47	-37	32.92	2.94	5.37	18.84	25.24	11.94
YMR008C	272	19.49	0.07	-0.09	-2.4	-52	14.29	0.66	7.28	9.26	6.04	12.47
YMR010W	275	44.01	0.16	3.64	17.4	-18	25.99	20.52	8.69	0.81	17.57	21.47
YMR011W	41	-16.34	-0.4	-6.38	2.29	-18	1.6	36.8	38.95	32.59	28.7	42.49
YMR012W	126	42.91	0.34	13.99	-3.44	-47	41.42	-4.9	7.37	6.9	20.78	23.76
YMR013C	108	0.28	0	1.07	-3.55	-55	3.62	2	22.64	17.23	-8.27	-7.86
YMR015C	181	3.55	0.02	-0.79	19.59	-47	24.84	-3.48	-16.81	3.77	19.09	27.42
YMR022W	19	18.79	0.99	31.68	37.98	-18	31.68	19.49	13.5	8.45	-0.2	-2.87
YMR026C	115	6.66	0.06	-4.38	13.03	-67	11.29	5.61	-0.12	5.01	0.68	-5.14
YMR027W	69	16.8	0.24	5.73	3.16	-38	24.48	9.12	0.52	-9.62	5.62	23.73
YMR033W	30	6.97	0.23	6.97	5.71	-29	6.97	16.54	0.46	-3.2	7.14	1.47
YMR035W	22	-2.06	-0.09	9.36	11.03	-21	9.36	6	-4.11	5.48	10.4	7.38
YMR038C	32	-0.28	-0.01	2.85	5.83	-18	9.84	-3.11	7.73	30.56	8.62	2.77
YMR042W	83	2.6	0.03	-3.74	-3	-21	12.35	-5.89	-13.46	-27.23	-11.41	21.71
YMR047C	77	17.67	0.23	11.61	13.84	-72	13.31	15.79	19.26	28.7	16.55	16.4
YMR049C	37	-0.56	-0.02	-1.77	0.1	-19	2.29	6.96	3.16	-1.39	-0.6	-4.66
YMR054W	53	1.38	0.03	1.24	7.36	-21	6.38	20.04	21.05	13.85	6.55	4.24
YMR055C	107	2.96	0.03	0	1.29	-57	6.98	-1.81	-3.51	-2.8	12.93	14.29
YMR058W	44	45.65	1.04	41.41	-1.41	-37	44.81	23.78	40.06	7.63	29.57	66.49
YMR062C	25	-11.12	-0.44	-11.65	-17.99	-24	-11.65	-5.5	8.22	2.7	-5.67	-0.65
YMR067C	15	-4.93	-0.33	-2.03	N/A	N/A	N/A	2.07	0.48	6.79	-8.29	0.23
YMR071C	45	-2.48	-0.06	-5.07	-0.81	-33	7.41	8.6	7.59	-9.14	-7.95	1.96
YMR072W	32	5.01	0.16	6.25	-10.97	-31	6.25	-6.34	25.16	34.46	10.19	1.15
YMR074C	7	5.95	0.85	-3.16	N/A	N/A	N/A	-15.18	2.13	-1.33	27.81	58.77
YMR079W	33	49.28	1.49	42.58	49.84	-18	54.92	16.91	-3.79	11.1	14.5	-7.51
YMR080C	81	24.95	0.31	4.05	11.76	-52	21.57	14.26	0.3	2.3	15.28	12.26
YMR083W	66	64.46	0.98	19.79	34.21	-22	54.97	16.39	7.38	4.24	42.13	73.31
YMR088C	75	22.83	0.3	14.3	16.63	-68	22.91	8.68	0.86	1.18	3.97	3.51
YMR089C	117	13.69	0.12	8.63	-11.95	-49	14.44	6.81	6.06	6.79	25.82	20.5
YMR091C	34	7.2	0.21	7.2	8.01	-20	8.09	1.62	2.83	3.66	4.02	-1.05
YMR092C	84	27.58	0.33	8.31	2.96	-74	24.14	11.51	23	26.21	34.02	41.76
YMR093W	66	-4.63	-0.07	-3.99	8.03	-18	10.63	10.81	2.89	4.56	7.34	14.16
YMR099C	25	-4.7	-0.19	5.83	0.21	-19	18.09	-22.58	-13.71	20.76	14.91	4.58
YMR105C	61	2.61	0.04	6.35	1.69	-52	6.35	0.32	11.03	7.12	-2.22	4.35
YMR108W	208	43.47	0.21	9.04	26	-18	28.35	40.86	15.7	19.64	26.34	19.89
YMR109W	26	-4.49	-0.17	-4.49	-2.79	-23	-2.59	7.4	13.11	-0.03	-8.86	-5.91
YMR110C	33	10.46	0.32	8.36	15.45	-18	16.52	9.84	4.42	1.26	5.87	11.85
YMR112C	336	-4.35	-0.01	0	-1.84	-80	2.43	-2.51	-31.33	-45.85	-20.44	-4.48
YMR113W	47	-4.33	-0.09	-5.4	5.84	-22	6.5	7.04	2.64	3.89	1.68	0.83
YMR116C	31	-29.76	-0.96	-29.76	-6.28	-22	-1.17	13.78	20.3	55.96	41.6	5.02
YMR119W	193	-10.16	-0.05	-1.14	4.55	-102	5.45	2.84	1.05	8.84	4.53	9.71
YMR120C	37	18.31	0.49	14.36	9.76	-21	15.91	-11.91	-9.7	8.93	5.43	-2.22
YMR121C	96	12.54	0.13	1.07	16.88	-20	19.67	27.85	9.58	-4.32	12.85	18.07
YMR122W-A	46	4.1	0.09	7.58	23.64	-38	22.1	48.2	24.7	2.37	3.04	31.65
YMR123W	33	-11.01	-0.33	-2.52	-21.97	-32	-2.52	-6.16	-14.32	-12.49	16.8	17.51
YMR125W	78	-0.15	0	-1.22	1.07	-73	1.21	7.46	4.98	3.72	5.16	1.37
YMR126C	78	6.01	0.08	1.54	4.46	-61	8.01	6.07	0.63	-2.45	-6.37	-7.93
YMR127C	104	-10.69	-0.1	-6.71	2.26	-19	2.26	1.9	1.35	1.02	-0.05	-1.01
YMR129W	59	6.79	0.12	1.3	-0.78	-36	11.7	5.72	18.74	26.21	-1.68	2.27
YMR130W	79	-33.03	-0.42	3.44	-12.05	-61	4.48	20.54	6.68	-14.89	-7.6	13.86
YMR131C	94	-4.14	-0.04	3.21	-37.89	-54	14.95	-28.07	25.74	37.37	47.57	41.98
YMR139W	213	96.38	0.45	2.63	15.21	-38	46.77	9.32	13.93	6.12	2.84	20.69
YMR142C	17	-13.43	-0.79	14.93	12.67	N/A	N/A	26.34	-12.1	5.86	48.76	35.27
YMR143W	29	-69.51	-2.4	-73.83	-56.47	-20	-55.94	-13.41	17.78	41.07	55.26	35.97
YMR145C	69	16.83	0.24	12.28	9.84	-57	14.45	7.86	-0.84	29.88	42.68	14.93
YMR146C	40	21.09	0.53	22.39	20.31	-38	24.99	22.91	28.11	16.73	11.36	30.66
YMR148W	242	48.35	0.2	6.47	1.58	-158	18.54	3.48	1.8	2.87	6.55	12.18
YMR149W	66	2.17	0.03	28.08	-23.34	-62	37.37	-8.92	8.54	10.02	35.26	44.37
YMR152W	72	0.68	0.01	3.71	0.87	-54	10.68	4.69	13.37	28.83	-10.17	-21.06
YMR153W	41	-3.79	-0.09	9.23	-14.03	-40	9.23	-6.97	4.01	10.81	5.6	-2.32
YMR157C	18	4.96	0.28	9.22	7.36	N/A	N/A	-2.14	2.23	-9.18	-13.81	5.76
YMR158C-A	44	4.56	0.1	6.42	-20.53	-43	6.42	-17.6	3.21	4.28	4.28	3.21
YMR158W	45	12.09	0.27	4.86	11.86	-18	10.93	12.63	2.69	-0.81	8.83	13.22
YMR161W	38	-2.35	-0.06	-0.76	-1.14	-25	4.31	11.2	10.1	-2.07	1.65	3.36
YMR171C	198	2.53	0.01	-4.38	0.38	-115	5.48	-2.09	-13.45	-0.43	15.4	25.89
YMR173W	42	-7.62	-0.18	3.59	-14.1	-41	3.59	2.65	9.58	10.45	-6.17	4.78
YMR178W	30	-0.72	-0.02	-0.72	-7	-28	1.85	-1.08	-10.62	-13.47	-21.65	-17.75
YMR183C	69	33.74	0.49	13.93	7.52	-42	29.41	13.44	10.94	1.41	-21.3	5.83
YMR184W	36	25.43	0.71	18.28	22.51	-25	41.99	19.63	-18.3	-36.71	-0.03	15.22
YMR186W	24	-15.24	-0.63	-5.82	26.95	-18	18.42	47.43	42.06	20.3	17.75	15.61
YMR189W	153	50.82	0.33	3.35	5.75	-75	24.98	11.39	12.61	17.56	12.25	9.93
YMR191W	27	0.73	0.03	-4.52	14.53	-18	1.97	8.3	-26.52	-18.71	6.6	1.07
YMR195W	79	3.43	0.04	0.44	-5.69	-58	11.43	-1.65	7.28	1.09	8.06	28.23
YMR197C	33	9.11	0.28	9.11	1.65	-32	9.11	-3.13	6.74	15.58	-1.81	4.94
YMR199W	195	24.27	0.12	11.99	5.54	-189	16.14	5.13	-0.2	4.64	8.89	9.53
YMR200W	106	24.47	0.23	15.09	6.97	-97	16.49	-3.52	-2.71	17.32	21.27	4.74
YMR202W	36	-50.5	-1.4	-47	-10.73	-21	-16.52	18.66	49.87	25.05	27.95	55.52
YMR203W	56	27.85	0.5	17.82	5.61	-45	19.97	23.67	33.08	37.83	30.44	15.43
YMR205C	66	23	0.35	-9.53	20.37	-32	26.86	10.65	2.87	18.08	27.45	15.85
YMR208W	21	-2.22	-0.11	2.75	5.19	-20	2.75	19.29	13.72	12.53	19.54	21.27
YMR209C	37	-0.06	0	-2.27	-1.91	-31	2.68	7.31	20.25	8.11	-11.82	-7.58
YMR212C	127	63.1	0.5	21.67	29.5	-27	34.37	5.15	-2.96	8.47	21.46	23.1
YMR214W	19	-11.19	-0.59	-20.26	-25.19	-18	-20.26	-8.12	4.28	-1.95	-12.02	-1.03
YMR215W	21	22.13	1.05	28.63	21.74	-20	28.63	10.48	18.71	11.97	24.38	17.61
YMR216C	189	2.77	0.01	2.14	3.31	-50	7.11	10.9	6.04	9.85	5.05	-6.3
YMR217W	43	-8.65	-0.2	-22.4	31.83	-18	27.89	39.79	11.51	12.83	47.68	36.92
YMR220W	89	3.21	0.04	0	4.19	-34	6.82	12.71	4.39	2.5	34.55	29.4
YMR221C	51	2.49	0.05	3.17	12.24	-18	12.24	21.93	-3.02	-2.28	6.73	-1.14
YMR222C	41	0.78	0.02	-11.49	-6.23	-24	0.72	-23.85	-15.5	-5.2	-1.54	13.97
YMR223W	43	0.87	0.02	-0.3	12.05	-18	4.82	19.94	5.89	3.95	1.39	4.39
YMR225C	9	5.44	0.6	12.78	N/A	N/A	N/A	7.09	15.6	10.21	5.28	6.88
YMR226C	32	2.16	0.07	4.55	-6.61	-23	12.98	-4.95	-0.38	19.9	22.6	-13.62
YMR229C	108	10.28	0.1	-8.17	7.88	-60	16.46	17.1	11.54	12.24	16.17	0.53
YMR230W	32	-35.66	-1.11	-32.45	-10.3	-18	-14.24	-1.39	-29.65	3.42	32.79	24.58
[truncated: 680 more rows]

## Sheet:  PARS data Ded1 dependent mRNAs
#YORF	Gene	Length	Total	Avg	First30	Start30	Max30Pos	Max30	Plus15	Plus30	Plus45	Plus60	Plus75	ΔTEded1-cs
YAL009W	SPO7	27	-4.99	-0.18	-0.42	8.06	-20	10.28	3.19	0.47	18.42	15.6	0.82	-2.12392
YAL022C	FUN26	35	-15.8	-0.45	-12.33	-4.66	-31	-10.05	17.05	10.14	-7.01	21.98	21.44	-1.30534
YAL026C	DRS2	88	0.01	0	-0.02	9.12	-32	9.54	6.24	-4.29	1.36	9.39	13.16	-1.68001
YAL029C	MYO4	49	1.93	0.04	-11.45	14.45	-20	17.19	2.48	8.26	17.14	13.78	9.44	-1.15566
YAL040C	CLN3	320	83.75	0.26	9.8	7.68	-195	20.38	31.07	44.34	24.4	-1.13	4.01	-2.34669
YAL041W	CDC24	89	20.23	0.23	-1.93	15.26	-24	20.53	9.2	6.09	6.28	14.46	19.07	-1.69033
YAR007C	RFA1	66	8.73	0.13	-0.28	-2.49	-37	17.38	0.01	4.9	3.47	-0.37	7	1.09847
YAR014C	BUD14	152	-1.27	-0.01	-1.19	-5.83	-75	8.05	-2.98	14.06	19.09	-9.8	-4.86	-2.08279
YBL017C	PEP1	185	16.45	0.09	3.17	13.7	-18	16.44	15.1	10.5	-5.1	-0.34	14.65	-2.04369
YBL020W	RFT1	159	14.63	0.09	5.1	-3.38	-60	11.58	3.01	17.15	16.16	9.25	11.58	-2.9941
YBL028C		34	10.31	0.3	7.81	13.95	-18	14.64	28.15	24.74	-6.56	-17.05	1.89	1.26619
YBL030C	PET9	92	62.02	0.67	33.13	21.12	-74	40.66	23.92	22.18	28.61	-7.16	-5.23	-1.28037
YBL032W	HEK2	76	89.22	1.17	61.27	-5.1	-70	67.97	19.57	8.46	-18.46	-10.95	7.91	-1.23262
YBL033C	RIB1	30	1.44	0.05	2.51	5.25	-18	6.32	9.47	5.25	1.74	9.77	-0.34	1.71662
YBL047C	EDE1	154	5.43	0.04	-2.47	4.63	-34	10.22	3.53	6.7	4.08	26.58	30.97	-1.7958
YBL054W	TOD6	102	13.03	0.13	8.33	34.98	-18	35.21	18.4	0.15	2.42	1.95	1.87	-1.22272
YBL079W	NUP170	28	-0.26	-0.01	-0.26	1.71	-24	2.21	6.83	17.76	9.85	0.68	4.92	-1.18971
YBL099W	ATP1	299	108.72	0.36	-2.42	15.17	-72	53.88	25.94	24.65	10.87	14.39	19.16	-1.36598
YBL102W	SFT2	91	28.82	0.32	6.86	16.43	-29	23.81	12.72	45.62	47.44	29.12	51.87	-2.09767
YBR005W	RCR1	36	-2.76	-0.08	-2.9	-6.11	-29	0.96	-2.66	7.45	6.17	-4.26	-7.67	1.79739
YBR015C	MNN2	108	38.68	0.36	0.76	0.87	-49	29.61	23.68	20.06	12.47	26.99	20.32	-1.75866
YBR023C	CHS3	51	-20.3	-0.4	-6.55	-22.96	-50	-6.55	5.62	21.08	-16.97	-9.23	24.31	-2.08976
YBR035C	PDX3	18	11.81	0.66	10.76	12.98	N/A	N/A	10.6	15.67	2.96	-3.95	-22.3	1.2748
YBR038W	CHS2	94	16.29	0.17	2.74	14.89	-21	11.79	2.73	-3.08	-3.75	8.58	-2.79	-1.81651
YBR053C		53	4.88	0.09	1.84	-9.23	-35	10.88	-7.39	1.43	6.19	20.3	5.96	1.42333
YBR068C	BAP2	52	16.91	0.33	17.79	7.61	-50	20.27	15.02	3.34	11.84	18.95	2.73	-1.71658
YBR077C	SLM4	123	-2.93	-0.02	2.14	2.09	-37	15.59	-14.24	-36.78	-38.66	-41.59	-2.57	1.5071
YBR084W	MIS1	71	4.66	0.07	6.73	0.69	-60	16.95	-4.03	7.1	31.71	2.48	-8.8	-1.93077
YBR086C	IST2	248	122.83	0.5	15.89	22.8	-90	36.4	17.22	10.71	10.35	9.42	0.14	-1.86304
YBR101C	FES1	39	4.81	0.12	0.03	-1.67	-30	3.74	-4.71	12.72	-4.79	-12.87	11.67	1.16319
YBR125C	PTC4	177	11.44	0.06	7.43	0.44	-76	13.72	16.75	33.46	17.93	0.85	4.92	-1.68313
YBR135W	CKS1	86	37.99	0.44	-2.11	-9.35	-55	29.33	-1.22	7	-5.56	4.83	17.43	-1.48237
YBR146W	MRPS9	63	19.09	0.3	-0.09	9.23	-32	21.61	1.08	7.75	32.18	20.79	-20.11	-1.67356
YBR151W	APD1	148	4.25	0.03	-7.8	12.47	-19	14.57	11.95	0.82	-2.86	7.94	22.58	-1.72319
YBR172C	SMY2	98	32.84	0.34	6.94	16.04	-38	27.41	9.7	3.24	14.79	17.69	17.09	-1.44389
YBR173C	UMP1	24	4.17	0.17	5	33.15	-18	24.41	23.06	12.83	19.61	23.45	21.1	1.26595
YBR187W	GDT1	115	66.24	0.58	7.03	-10.46	-46	49.06	-15.59	21.34	38.78	25.2	22.24	-2.25687
YBR211C	AME1	100	16.04	0.16	0.28	-2.36	-64	16.47	-4.94	-2.64	-5.34	-7.33	1.35	-2.65668
YBR212W	NGR1	351	20.07	0.06	1.4	1.49	-62	7.78	7.02	10.3	6.59	7.72	13.2	-2.08829
YBR218C	PYC2	142	14.84	0.1	10.36	2.74	-141	10.36	-17.18	-15.52	9.53	7.88	1.56	-1.20835
YBR221C	PDB1	204	229.22	1.12	61.67	31.52	-25	67.42	13.57	37.45	51.04	41.08	24.57	-1.18076
YBR231C	SWC5	59	-7.07	-0.12	-4.59	0.45	-18	-0.48	0.14	0	-0.93	0.14	1.35	1.50083
YBR252W	DUT1	15	-9.9	-0.66	17.78	N/A	N/A	N/A	31.49	6.24	22.55	29.03	32.48	1.61008
YBR283C	SSH1	149	57.94	0.39	2.74	29.51	-106	41.2	22.15	26.89	40.31	15.9	24.85	-2.07863
YCL035C	GRX1	45	21.95	0.49	21.08	18.86	-19	30.32	37.2	25.8	-3.51	-8.43	0.21	1.3489
YCL037C	SRO9	59	39.66	0.67	28.91	11.05	-58	28.91	6.61	11.12	15.06	21.36	20.45	-1.30046
YCL045C	EMC1	43	21.04	0.49	12.22	20.57	-36	26.02	-8.63	-3.83	40.5	39.76	23.23	-1.16318
YCL052C	PBN1	34	4.4	0.13	5.33	9.15	-20	10.23	3.72	1.79	5.9	7.63	5.35	-1.88805
YCR008W	SAT4	140	26.61	0.19	9.32	12.14	-123	17.54	20.69	11.56	4.17	14.64	9.6	-2.31727
YCR017C	CWH43	32	24.24	0.76	24.07	29.13	-21	30.46	13.16	5.85	7.76	21.99	21.53	-1.2958
YCR020C-A	MAK31	9	2.62	0.29	8.1	N/A	N/A	N/A	1.77	-2.56	0.61	7.51	-0.66	1.47917
YCR027C	RHB1	200	22.74	0.11	-16.97	-6.52	-45	21.49	7.73	33.37	20.61	6.96	6.62	-1.67295
YCR028C	FEN2	90	49.58	0.55	16.77	46.94	-22	46.01	14.18	-6.93	-8.38	11.15	2.02	-2.35783
YCR057C	PWP2	128	31.87	0.25	-4.31	4.08	-47	29.82	2.26	14.52	19.73	7.05	7.65	-1.12353
YCR084C	TUP1	203	78.47	0.39	18.32	19	-198	28.5	8	5.8	18.3	15.04	4.17	-1.86421
YDL006W	PTC1	334	-14.96	-0.04	-1.3	4.05	-218	11.8	-0.11	0.68	6.98	3.21	1.07	-2.97982
YDL007W	RPT2	37	-1.34	-0.04	-4.08	15.07	-21	16.14	18.35	-1.7	-17.84	-8.77	3.02	1.09032
YDL019C	OSH2	215	23.8	0.11	3.77	-2.42	-63	11.65	-8.66	-3.77	-2.09	-1.58	-4.63	-3.34536
YDL020C	RPN4	246	6.9	0.03	-1.05	3.64	-181	11.61	0.56	-6.82	8.64	8.56	6.76	-1.32332
YDL123W	SNA4	52	24.19	0.47	13.63	7.73	-36	23.9	8.26	6.55	2.14	10.83	9.16	-2.34685
YDL125C	HNT1	212	-13.53	-0.06	-4.03	7.15	-22	20.17	5.8	-3.47	14.04	41.05	29.55	1.05827
YDL130W	RPP1B	18	-37.33	-2.07	-32.24	-31.46	N/A	N/A	15.97	25.08	34.14	44.25	31.64	1.38663
YDL132W	CDC53	303	42.31	0.14	6.51	6.2	-66	16.45	6.47	6.83	10.01	-4.09	-5.99	-1.13331
YDL133C-A	RPL41B	24	39.12	1.63	24.53	11.7	-22	24.61	-37.83	-36.65	-15.09	14.31	3.97	1.13781
YDL134C	PPH21	486	59.29	0.12	2.22	-3.1	-312	38.4	15.26	11.59	16.4	11.67	3.03	-1.43604
YDL140C	RPO21	49	-9	-0.18	-0.85	0.15	-20	1.25	14.91	12.32	2.16	2.3	7.17	-2.58074
YDL141W	BPL1	186	-6.53	-0.04	0.14	-0.27	-90	10.09	-1.29	11.81	5.46	-4.17	8.3	-1.61147
YDL145C	COP1	240	55.55	0.23	27.01	3.27	-238	27.95	6.74	8.95	6.2	5.64	18.68	-2.12086
YDL164C	CDC9	53	-15.87	-0.3	-11.34	-2.02	-21	-0.27	0.53	12.28	9.45	-0.54	9.5	-1.31139
YDL171C	GLT1	111	16.68	0.15	-1.5	11.7	-79	13.65	-11.11	-23.18	-0.93	-16.66	-22.39	-1.72317
YDL178W	DLD2	9	-5.84	-0.65	1.86	N/A	N/A	N/A	7.57	8.81	13.05	6.52	-1.52	1.17199
YDL180W		386	3.97	0.01	-0.65	5.08	-22	13.39	3.27	0.96	3.44	2.7	3.25	-2.33686
YDL184C	RPL41A	24	9.43	0.39	-5.24	-5.4	-20	6.35	-34.67	-36.65	-14.76	13.32	3.31	1.14009
YDL188C	PPH22	162	24.43	0.15	16.11	6.47	-158	17.19	-13.05	-11.49	5.74	12.28	10.63	-1.68736
YDL190C	UFD2	187	6.13	0.03	-23.97	7.34	-145	15.5	-4.52	-0.33	8.16	11.28	12.61	-1.95446
YDL195W	SEC31	104	-2.61	-0.03	7.63	-14.66	-97	17.21	18.29	11.36	6.99	7.46	-1.64	-1.36378
YDL203C	ACK1	88	-6.92	-0.08	-2.65	-4.67	-75	2.99	-7.93	-0.09	1.94	-3.06	0.73	-1.99421
YDL205C	HEM3	202	40.07	0.2	8.29	10.36	-38	16.39	18.39	22.19	21.48	9.91	5.33	-2.08207
YDL213C	NOP6	18	0.13	0.01	2.27	3.34	N/A	N/A	8.37	9.2	7.39	2.56	4.19	1.28857
YDL224C	WHI4	366	38.55	0.11	-0.17	4.98	-273	19.12	-1.89	1.41	1.85	1.47	7.45	-2.32881
YDL235C	YPD1	101	23.56	0.23	2.74	33.7	-18	26.18	47.37	26.54	-22.03	-35.61	-9.95	-1.85857
YDR002W	YRB1	61	-8.36	-0.14	-8.51	7.58	-19	19.82	-13.37	-47.09	-13.31	48.44	65.09	1.21178
YDR011W	SNQ2	318	72.84	0.23	5.08	-4.45	-132	21.53	7.77	25.86	8.85	21.84	28.65	-1.59592
YDR028C	REG1	319	22.18	0.07	2.24	10.88	-45	15.58	15.9	1.07	1.21	0.83	3.9	-2.0417
YDR032C	PST2	57	1.32	0.02	-1.18	-5.16	-38	28.38	-6.19	-7.6	3.01	9.82	14.09	1.20265
YDR033W	MRH1	240	121.47	0.51	45.6	14.17	-232	50.39	-13.7	-7.43	27.29	29.1	29.01	-1.43722
YDR041W	RSM10	11	1.2	0.11	-1.35	N/A	N/A	N/A	2.32	17.89	18	-1.27	-1.6	1.23096
YDR047W	HEM12	194	25.63	0.13	8.47	15.96	-24	12.57	13.84	5.68	-16.51	-7.42	25.42	-1.36678
YDR050C	TPI1	32	-30.48	-0.95	-28.51	20.64	-18	12.74	99.97	65.6	52.83	46.49	0.93	1.14692
YDR060W	MAK21	51	-5.55	-0.11	2.93	-4.7	-38	5.95	4.73	11.71	15.34	2.13	-1.18	-1.59678
YDR062W	LCB2	74	47.16	0.64	32.37	20.23	-67	48.26	34.98	34.35	46.35	37.76	27.25	-2.27288
YDR135C	YCF1	37	15.73	0.43	11.32	-1	-31	15.42	4.86	9.15	-1.13	2.4	4.28	-1.93191
YDR143C	SAN1	46	7.14	0.16	8.05	-4.06	-38	9.12	5.58	9.98	7.09	-1.98	14.52	-2.77106
YDR144C	MKC7	133	-16.57	-0.12	14.71	-8.47	-129	19.67	17.05	16.67	19.05	22.56	25.76	-2.20822
YDR155C	CPR1	37	2.3	0.06	-3.49	41.46	-18	43.78	54.74	50.06	38.61	8.63	8.44	1.08323
YDR170C	SEC7	274	3.59	0.01	2.28	13.78	-22	14.94	-1.65	1.12	9.86	5.5	3.03	-2.23944
YDR206W	EBS1	153	1.46	0.01	0.27	2.28	-36	17.8	0	5.48	-4.46	-15.63	0.64	-1.34839
YDR214W	AHA1	106	15.24	0.14	1.86	3.34	-63	23.72	-2.95	-0.24	23.92	17.19	-1.55	-1.44658
YDR232W	HEM1	229	39.22	0.17	15.49	22.53	-19	27	13.88	10.66	24.75	43.45	49.92	-1.16894
YDR251W	PAM1	278	54.35	0.2	2.47	15.15	-194	26.02	11.67	5.66	8.72	12.5	9.4	-3.52686
YDR266C		218	29.21	0.13	8.07	0.07	-114	23.12	8.05	11.66	15.18	8.85	26.78	-2.84896
YDR276C	PMP3	52	-20.61	-0.4	5.54	-8.19	-51	5.54	27.92	24.95	47.68	-9.76	-43.78	1.19628
YDR284C	DPP1	267	37.34	0.14	-14.87	13.09	-29	25.73	8.73	19.58	4.2	3.43	2.23	-2.91287
YDR292C	SRP101	117	-2.56	-0.02	-21.35	5.98	-47	16.01	21.86	38.42	35.07	10.08	3.55	-2.8885
YDR296W	MHR1	56	7.48	0.13	9.2	-5.3	-44	15.23	3.32	6.94	9.55	7.4	-2.5	1.60043
YDR304C	CPR5	43	-18.04	-0.42	-9.62	-10.06	-20	-7.5	3.57	11.52	7.88	15	46.61	1.09986
YDR326C	YSP2	186	26.29	0.14	-0.74	9.82	-121	20.41	0.24	-8.11	-11.45	2.96	33.38	-1.35355
YDR333C		36	12.02	0.33	12.64	7.62	-34	13.24	-10.74	-23.81	-3.61	9.25	6.59	-1.21682
YDR335W	MSN5	362	24.3	0.07	6.54	10.7	-54	11.45	9.09	4.44	15.29	13.94	3.96	-2.04612
YDR347W	MRP1	91	-4.18	-0.05	2.61	0.89	-82	9.85	2	12.26	9.98	4.48	1.41	-1.59596
YDR349C	YPS7	91	-2.3	-0.03	-6.17	19.62	-20	31.67	7.32	11.09	1.76	0.82	10.95	-2.45494
YDR363W-A	SEM1	24	-0.95	-0.04	1.6	11.57	-18	4.17	33.66	21.76	0.14	-2.33	-11.25	1.37818
YDR372C	VPS74	251	2.19	0.01	1.89	2.98	-63	14.89	-0.48	10.02	12.85	17.67	24.56	-2.08328
YDR381W	YRA1	85	-15.71	-0.18	-10.46	25.67	-18	10.45	20.5	18	-8.49	2.58	17.08	-1.90416
YDR382W	RPP2B	67	-28.34	-0.42	-18.38	-12.82	-48	10.36	-24.79	23.87	79.32	58.19	-10.73	1.08012
YDR404C	RPB7	195	44.49	0.23	18.34	-13.64	-85	20.88	1.55	23.71	5.34	-6.7	-3.42	-1.92494
YDR415C		47	5.61	0.12	8.33	-20.31	-42	9.26	-16.52	-1.08	1.99	2.69	0.86	1.60959
YDR422C	SIP1	179	4.03	0.02	-8.31	7.44	-30	8.2	-0.99	-4.64	4.8	12.59	7.22	-1.45909
YDR429C	TIF35	19	0.62	0.03	-10.22	-5.44	-18	-10.22	-7.16	4.85	16.16	15.63	6.53	1.1445
YDR434W	GPI17	98	21.05	0.21	-2.98	18.07	-36	26.5	0.37	-3.39	11.69	18.26	6.82	-1.95514
YDR452W	PPN1	152	-8.86	-0.06	0.67	-3.49	-51	7.24	15.29	4.02	-5.6	3.77	11.89	-1.37321
YDR477W	SNF1	252	16.46	0.07	-1.98	13.78	-18	15.84	13.78	4.37	14.75	15.86	-2.87	-1.64707
YDR497C	ITR1	77	-4.86	-0.06	19.31	12.1	-74	25.17	33.14	55.62	10.5	4.85	30.81	-1.80818
YDR517W	GRH1	146	54.43	0.37	-1.48	21.49	-61	37.02	14.21	12.24	-4.49	-0.02	14.56	-1.81804
YDR524C-B		25	-2.34	-0.09	-2.76	11.44	-19	-1.25	42.48	67.08	53.11	39.37	47.82	1.37578
YDR529C	QCR7	47	-46.24	-0.98	-16.71	-15.91	-43	-11.98	14.85	11.12	-0.56	0.82	20.94	1.1336
YEL001C	IRC22	26	9.49	0.37	12.46	20.52	-18	18.67	20.11	17.84	41.97	33.67	17.26	1.26276
YEL036C	ANP1	123	16.84	0.14	1.48	5.11	-51	19.01	9.79	19.43	15.31	7.6	11.55	-1.62203
YEL040W	UTR2	39	-18.81	-0.48	-3.56	-38.41	-38	-3.56	-4.4	32.76	24.03	24.4	-13.37	1.03289
YEL042W	GDA1	151	13.39	0.09	-22.14	12.1	-88	30.03	21.1	22.44	23.54	12.91	25	-2.63957
YER006W	NUG1	23	-23.13	-1.01	-45.82	-48.73	-20	-43.12	-19.18	0.27	2.25	4.05	-0.02	1.0218
YER018C	SPC25	96	-3.91	-0.04	-0.19	5.17	-54	13.35	34.47	36.85	16.68	-0.17	7.01	-2.23132
YER062C	HOR2	199	-14.65	-0.07	0	-18.69	-72	28.55	-10.03	14.95	34.05	28.14	3.6	1.02262
YER088C	DOT6	462	94.79	0.21	18.74	23.99	-20	29.98	23.84	23.57	17.29	13.95	20.96	-2.52181
YER089C	PTC2	305	29.79	0.1	8.15	2.58	-76	18.91	13.18	12.23	18.7	30.08	9.94	-1.72096
YER107C	GLE2	178	11.1	0.06	9.39	-16.88	-97	25.81	6.49	4.89	9.75	14.97	4.41	-1.29298
YER125W	RSP5	509	15.08	0.03	-2.11	14.88	-247	23.84	26.14	11.45	8.94	22.75	28.51	-2.39946
YER149C	PEA2	59	-2.7	-0.05	-1.03	-1.14	-22	1.3	1.44	3.64	15.25	10.9	0.86	-2.16414
YER150W	SPI1	22	1.31	0.06	2.19	3.45	-20	3.12	10.38	6.04	8.84	4.8	2.01	1.13223
YER155C	BEM2	60	4.57	0.08	0.27	13.22	-18	10.63	-8.17	-10.63	0.05	6.04	7.9	-1.36061
YER165W	PAB1	134	13.41	0.1	1.11	33.83	-105	38.06	43.18	6.58	-10.7	-11.35	25.31	-1.59519
YER177W	BMH1	41	10.71	0.26	26.49	-6.04	-40	26.49	1.45	10.45	25.52	23.98	-3.22	1.1213
YER183C	FAU1	18	-8.56	-0.48	-3.91	-6.24	N/A	N/A	14.92	0.08	-2.77	-7.83	3.61	1.26979
YFL007W	BLM10	131	7.58	0.06	7.95	-8.31	-56	15.64	1.47	12.02	16.43	11.33	5.79	-1.50222
YFL009W	CDC4	180	4.21	0.02	1.74	2.95	-22	7.24	13.6	17.04	20.34	2.8	-3.77	-1.46402
YFL010C	WWM1	16	-20.03	-1.25	-56.62	-56.62	N/A	N/A	-42.04	5.23	9.96	6.63	8	1.35792
YFL014W	HSP12	40	9.27	0.23	7.62	22.4	-18	23.17	9.04	-3.48	3.82	5.02	5.7	1.73617
YFL016C	MDJ1	18	6.62	0.37	12.82	3.28	N/A	N/A	0.7	-2.45	13.71	20.87	9.59	1.15909
YFL045C	SEC53	88	62.02	0.7	-24.78	25.82	-33	66.83	23.57	36.29	32.48	37.44	75.61	-1.00663
YFR004W	RPN11	38	8.66	0.23	14.91	10.38	-37	14.91	8.01	1.95	15.34	17.33	5.61	1.12246
YFR018C		64	14.46	0.23	3.35	0.21	-23	22.01	-17.82	5.89	17.77	24.62	21.32	-2.30798
YFR030W	MET10	56	16.46	0.29	4.55	9.98	-29	16.1	10.16	2.43	0.03	3.35	3.75	-1.74334
YGL008C	PMA1	238	165.93	0.7	-5.04	-0.38	-60	88.72	46.11	80.47	79.94	40.15	2.03	-2.06119
YGL014W	PUF4	382	74.81	0.2	11.48	20.92	-35	25.87	4.09	8.34	14.45	10.08	9.5	-1.1596
YGL027C	CWH41	50	16.1	0.32	0.77	14.86	-23	18.36	-3.36	2.37	13.95	23.49	22.1	-1.49787
YGL035C	MIG1	117	-0.33	0	11.12	3.8	-111	18.59	7.26	14.82	21.63	5.2	3.57	-2.00307
YGL037C	PNC1	56	-25.92	-0.46	2.48	-34.43	-52	4.62	-19.62	-7.16	2.14	-2.88	20.84	1.28414
YGL039W		100	-16.14	-0.16	5.32	-6.16	-79	11.82	7.49	19.71	1.69	-8.44	-5.43	-1.90236
YGL058W	RAD6	60	14.49	0.24	-1.23	25.42	-18	24.89	3.39	-28.65	-4.57	14.99	35.45	1.23364
YGL067W	NPY1	118	7.58	0.06	0	0.16	-50	13.93	2.79	9.52	7.44	-5.51	-5.41	-2.29039
YGL106W	MLC1	20	6.3	0.32	24.57	16.92	-19	24.57	10.4	27.33	51.36	29.12	-4.03	1.07462
YGL139W	FLC3	86	51.22	0.6	41.06	13.15	-80	45.21	7.07	3.81	-8.8	-9.3	11.33	-2.26498
YGL140C		47	1.62	0.03	0.53	-7.37	-42	4.89	-9.02	1.58	3.64	15.67	16.23	-1.48369
YGL167C	PMR1	130	67.13	0.52	20.41	21.13	-46	28.97	19.7	-1.51	0.86	10.24	12.35	-2.61472
YGL173C	KEM1	334	82.55	0.25	-2.24	26.76	-23	29.93	15.37	2.64	-4.32	-8.23	-3.17	-1.6204
YGL207W	SPT16	95	17.82	0.19	1.76	7.62	-60	12.8	10.15	5.66	10.86	12.08	4.92	-1.44799
YGL215W	CLG1	465	87.81	0.19	3.21	20.81	-36	36.76	21.2	24.65	13.8	16.6	21.82	-3.10588
YGL256W	ADH4	268	52.2	0.19	11.53	6.98	-76	26.55	18.38	10.45	2.6	10.26	10.1	2.12611
YGR014W	MSB2	9	8.66	0.96	19.01	N/A	N/A	N/A	12.99	1.74	7.62	27.91	19.86	-1.07065
YGR024C	THG1	33	-8.3	-0.25	-6.53	-9.73	-32	-6.53	1	4.21	16.42	-0.36	-11.98	-2.46046
YGR031W		146	22.46	0.15	1.07	10.78	-53	15.56	-2.62	7.14	2.57	-11.92	-6.73	-1.32081
YGR046W	TAM41	147	-8.92	-0.06	-1.93	-4.34	-66	6.19	7.14	-0.03	8.21	10.19	-1.22	-2.17338
YGR054W		148	30.79	0.21	-17.01	12.52	-93	26.41	3.23	2.05	20.16	45.77	37.27	-1.19834
YGR090W	UTP22	167	18.2	0.11	8	16.79	-27	19.21	1.28	8.54	24.03	21.08	12.68	-2.17258
YGR102C		4	3.17	0.79	3.29	N/A	N/A	N/A	-1.57	-20.8	-19.99	1.07	5.35	-1.97782
YGR108W	CLB1	117	25.76	0.22	14.3	3.61	-116	14.3	1	-5.42	-15.61	-18.8	-7.32	-2.37992
YGR143W	SKN1	163	29.63	0.18	1.03	20.63	-72	24.58	7	0.65	-1.87	-3.98	9.08	-1.39307
YGR157W	CHO2	216	87.99	0.41	-2.48	7.97	-128	38.56	12.79	10.84	4.57	13.2	35.84	-1.52844
YGR158C	MTR3	55	13.34	0.24	7.76	7.69	-35	13.2	2.3	12.67	20.49	22.21	21.84	1.4022
YGR178C	PBP1	216	31.07	0.14	9.48	3.75	-152	25.9	22.1	6.58	-0.46	0.66	12.11	-2.21828
YGR209C	TRX2	38	12.41	0.33	5.52	20.18	-19	22.88	32.4	26.67	28.05	-29.43	-28.96	1.01707
YGR210C		112	9.88	0.09	1.99	19.8	-80	20.25	22.61	0.5	16.46	5.22	-16.41	-2.11315
YGR218W	CRM1	291	0.61	0	0.71	5.94	-172	12.81	17.48	21.51	1.61	5.19	39.24	-2.16331
YGR234W	YHB1	22	12.75	0.58	35.42	27.13	-18	39.93	47.77	53.94	24.1	45.41	53.86	1.27462
YGR240C	PFK1	225	27.87	0.12	11.34	4.86	-202	33.21	40.21	37.76	18.46	10.32	38.23	-1.11763
YGR245C	SDA1	107	30.44	0.28	3.95	1.12	-42	29.06	11.19	6.01	0.51	9.02	7.86	-1.496
YGR255C	COQ6	71	14.08	0.2	9.29	8.92	-26	15.01	7.62	4.28	-6.36	0.74	10.91	-1.27158
YGR281W	YOR1	229	20.99	0.09	4.47	9.94	-37	13.46	13.77	8.96	14.49	20.62	17.59	-2.64578
YGR282C	BGL2	24	-4.8	-0.2	5.73	4.86	-22	9.27	33.51	46.87	30.94	-2.81	-0.82	1.06098
YGR285C	ZUO1	15	-5.51	-0.37	-2.18	N/A	N/A	N/A	29.53	16.62	28.5	53.91	19.33	1.33235
YHL004W	MRP4	82	27.76	0.34	11.36	1.56	-42	21.02	3.36	-0.96	-1.33	2.05	11.31	-1.3744
YHL025W	SNF6	49	1.06	0.02	-1.08	2.14	-31	3.35	-8.02	-6.32	5.78	-2.62	-2.93	1.29205
YHL027W	RIM101	132	5.09	0.04	0.14	4.53	-58	8.37	-4.41	3.05	10.89	10.4	11.38	-1.34922
YHR007C	ERG11	131	72.82	0.56	16.87	35.46	-62	43.3	29.61	6.24	22.41	23.36	32.09	-1.59721
YHR042W	NCP1	33	25.22	0.76	23.09	15	-22	31.04	-37.69	-26.4	24.79	58.44	72.11	-1.34755
YHR049W	FSH1	30	-20.11	-0.67	-17.68	-24.53	-24	-2.5	-11.65	2.55	8.78	12.86	10.88	1.24489
YHR055C	CUP1-2	53	46.99	0.89	39.18	11.18	-36	47.05	49.23	90.48	84.34	46.84	-13.11	1.72971
YHR071W	PCL5	61	56.23	0.92	58.5	-7.16	-60	58.5	-2.47	0.8	-3.22	9.98	11.04	-1.49886
YHR072W-A	NOP10	60	-118.71	-1.98	-83.15	0.88	-18	-13.93	40.72	29.56	8.72	-28.58	-5.69	1.05278
YHR086W	NAM8	207	38.1	0.18	-1.34	15.77	-22	22.37	13.72	-1.22	-0.49	15.34	4.41	-3.50505
YHR087W	RTC3	69	2.96	0.04	2.28	-2.51	-45	8.63	-11.89	-28.49	-7.81	-2.28	-3.73	1.75015
YHR098C	SFB3	76	32.55	0.43	10	11.76	-38	26.53	20.45	18.6	5.05	8.21	10.37	-1.85165
YHR103W	SBE22	82	10.89	0.13	4.51	15.79	-19	13.46	6.55	0.13	-5.45	9.13	27.86	-2.77741
YHR115C	DMA1	161	68.37	0.42	9.44	11.19	-50	42.13	27.14	37.91	26.41	22.06	16.27	-2.10693
YHR148W	IMP3	15	6.68	0.45	14.38	N/A	N/A	N/A	15.88	7.46	-8.5	-0.06	30.71	1.38215
YHR183W	GND1	79	22.99	0.29	11.71	33.31	-70	24.22	73.59	48.58	24.21	34.49	27.04	1.01795
YHR204W	MNL1	207	3.36	0.02	-2.53	10.42	-18	8.4	8.71	-0.66	-8.26	-9.08	8.26	-1.59137
YHR206W	SKN7	299	20.41	0.07	-7.8	3.86	-215	12.36	14.03	10.92	-0.73	9.36	14.17	-2.41134
YIL014W	MNT3	151	10.95	0.07	0.28	12.4	-23	17.94	4.06	1.82	2.58	3.21	8.05	-2.40732
YIL022W	TIM44	112	82.9	0.74	7.35	53.53	-29	71.47	17.1	5	26.78	46.74	39.56	-1.97303
YIL035C	CKA1	113	16.51	0.15	6.57	9.59	-91	16.48	5.54	-7.87	-12.11	-0.37	7.45	-1.56771
YIL036W	CST6	59	-3.68	-0.06	-10.85	4.85	-21	9.69	4.42	17.14	20.51	7.05	6.72	-2.54515
YIL048W	NEO1	331	-6.9	-0.02	-4.82	-2.49	-209	7.39	7.14	7	11.84	5.57	-4.94	-1.76067
YIL053W	RHR2	19	1.31	0.07	16.07	23.67	-18	16.07	-1.86	-15.38	10.81	4.5	19.45	1.19982
YIL076W	SEC28	12	-8.86	-0.74	-5.04	N/A	N/A	N/A	-5.39	0.53	25.55	30.03	1.9	1.251
YIL088C	AVT7	51	-22.01	-0.43	0.1	1.01	-20	3.23	35.82	12.96	1.5	-0.53	-5.5	-2.374
YIL090W	ICE2	124	18.42	0.15	-2.57	12.29	-80	29.06	6.86	2.5	-1	6.59	12.75	-3.36786
YIL125W	KGD1	60	-14.92	-0.25	2.02	-0.06	-55	4.45	4.38	-0.7	-2.01	-0.43	4.41	-1.12903
YIL131C	FKH1	75	-4.26	-0.06	-2.79	-4.73	-24	6.04	-11.08	-4.55	2.32	-5.2	-8.64	-2.07035
YIL138C	TPM2	22	2.26	0.1	3.07	1.97	-21	3.07	-2.41	5.19	11.69	2.48	-11.83	1.38975
YIL148W	RPL40A	15	9.11	0.61	12.09	N/A	N/A	N/A	23.79	39.36	45.01	32.26	23.6	1.00286
YIR006C	PAN1	49	21.96	0.45	9.9	18.25	-32	22.03	1.87	8.36	36.3	27.46	25.93	-1.56323
YIR016W		50	23.02	0.46	16.02	15.15	-18	17.37	17.23	26.91	20.89	19.1	20.16	2.29999
YJL002C	OST1	42	21.2	0.5	23.96	10.13	-36	35.7	16.57	3.13	9.64	26.23	13.46	-1.93459
YJL004C	SYS1	9	-5.53	-0.61	-0.57	N/A	N/A	N/A	-7.99	-11.61	10	7.29	4.09	-1.77617
YJL011C	RPC17	46	-7.21	-0.16	-1.22	-14.66	-45	-1.22	-4.87	4.81	3.43	-0.53	0.11	1.76954
YJL020C	BBC1	75	-4.18	-0.06	9.55	-22.24	-63	15.72	3.62	9.12	8.93	3.29	-1.85	-1.13621
YJL039C	NUP192	18	1.21	0.07	-0.67	-3.32	N/A	N/A	3.01	13.87	11.02	5.76	-3.17	-1.16299
YJL044C	GYP6	46	25.24	0.55	10.45	17.71	-35	23.13	-0.09	-8.56	-4.35	0.5	-3.56	-1.44423
YJL061W	NUP82	65	15.83	0.24	3.86	6.97	-37	12.9	0.72	-2.02	4.61	17.92	15.97	-1.58103
YJL062W	LAS21	34	5.64	0.17	5.64	5.94	-21	11.03	9.73	12.15	11.57	14.82	17.94	-1.2792
YJL076W	NET1	46	18.9	0.41	10.82	15.99	-39	18.49	14.47	11.57	15.25	13.76	14.51	-1.26065
YJL080C	SCP160	184	72.96	0.4	12.71	23.55	-24	30.81	21.56	22	18.55	14.44	25.45	-1.53442
YJL101C	GSH1	154	-4.56	-0.03	-2.71	-13.28	-127	9.51	7.41	16.7	22.37	11.91	11.22	-2.95141
YJL104W	PAM16	31	-0.54	-0.02	-0.54	3.81	-24	9.82	0.65	5.68	-2.14	-0.46	10.63	1.38024
YJL117W	PHO86	140	11.79	0.08	9.26	18.37	-18	18.5	-0.7	0.78	17.6	28.78	27.84	-1.22466
YJL128C	PBS2	194	21.82	0.11	-0.99	2.02	-120	18.8	9.86	22.7	17.02	-9.84	-11.83	-2.4217
YJL130C	URA2	625	33.8	0.05	0	13.09	-52	14.7	51.82	44.46	9.95	3.4	11.69	-2.81129
YJL140W	RPB4	85	23.51	0.28	15.48	-2.76	-64	22.55	1.87	-5.69	-1.02	5.64	18.71	-1.77837
YJL151C	SNA3	25	-4.72	-0.19	5.83	19.08	-18	17.69	31.89	21.52	5.78	-7.76	2.95	1.25803
YJL186W	MNN5	20	8.88	0.44	11.54	8.7	-19	11.54	0.79	-2.24	-2.18	7.81	30.52	1.054
YJL189W	RPL39	28	43.61	1.56	57.77	106.57	-18	92.68	104.52	44.4	-44.62	-30.42	3.79	1.11956
YJR014W	TMA22	39	19.01	0.49	17.3	-9.67	-37	18.37	-12.12	26.85	40.78	27.35	-0.16	1.10096
YJR025C	BNA1	68	12.78	0.19	12.17	-0.89	-58	12.45	-1.63	-2.56	-21.5	-20.52	13.07	1.36462
YJR046W	TAH11	18	-1.36	-0.08	-2.15	-1.08	N/A	N/A	1.83	15.41	16.91	7.11	8.05	-1.56566
YJR059W	PTK2	61	3.24	0.05	-1.03	7.75	-40	12.4	14.99	-1.26	-11.37	-0.51	4.56	-1.32459
YJR068W	RFC2	31	4.98	0.16	4.98	5.79	-30	4.98	-6.97	-10.91	3.88	18.29	14.94	-1.81372
YJR086W	STE18	24	-2.39	-0.1	-2.48	-1.05	-18	2.59	11.22	17.63	8.93	11.15	7.68	1.37105
YJR096W		123	1.82	0.01	2.28	5.32	-65	8.69	5.05	6.83	-3.29	-3.06	7.08	-1.27321
YJR104C	SOD1	30	-8.33	-0.28	-9.24	7.95	-18	-2.48	51.49	75.98	75.88	24.64	48.08	1.46436
YJR144W	MGM101	23	5.45	0.24	5.45	7.45	-19	7.59	-7.66	-5.11	10.66	6.57	7.26	-1.28289
YKL001C	MET14	31	13.79	0.44	13.79	12.76	-20	23.85	8.05	-23.09	-53.48	-14.96	17.81	1.61077
YKL004W	AUR1	354	146.25	0.41	26.03	16.66	-236	54.89	18	3.34	38.21	51.12	37.92	-2.21699
YKL040C	NFU1	434	-14.46	-0.03	-5.48	5.91	-412	6.55	2.55	-6.12	-21.59	-15	14.07	1.14609
YKL046C	DCW1	236	41.73	0.18	6.7	11.85	-103	32.02	5.59	21.71	21.55	-4.79	6.45	-2.09391
YKL054C	DEF1	86	16.91	0.2	5.05	12.54	-24	15.57	14.25	7.16	3.05	5.65	5.74	-1.08861
YKL056C	TMA19	110	11.15	0.1	0.59	-3.19	-22	14.01	-0.78	10.79	-5.67	27.98	29.6	1.16198
YKL068W	NUP100	122	15.34	0.13	1.07	16.57	-18	13.83	17.66	-0.14	-5.1	1.96	6.47	-1.25683
YKL080W	VMA5	93	5.18	0.06	0.89	22.93	-18	25.57	38.49	3.17	9.85	65.29	71.01	-1.59606
YKL096W-A	CWP2	50	33.48	0.67	29.14	-4.93	-36	56.34	26.79	58	77.87	81.71	17.64	1.16775
YKL104C	GFA1	187	65.18	0.35	1.45	-2.82	-59	32.15	10.91	12.15	-0.59	0.22	1.21	-1.12249
YKL126W	YPK1	191	41.08	0.22	-0.03	8.92	-35	22.92	-6.53	3.14	13.52	12.9	8.38	-1.31672
YKL145W	RPT1	63	21.27	0.34	8.66	4.45	-39	23.17	-14.88	14.71	34.69	23.2	-13.65	1.1258
YKL152C	GPM1	12	-12.19	-1.02	-11.19	N/A	N/A	N/A	22.18	17.07	-59.57	-38.12	77.14	1.18826
YKL160W	ELF1	20	0.98	0.05	-0.95	-6.06	-19	-0.95	-9.47	7.91	14.11	5.34	6.12	1.44993
YKL181W	PRS1	149	83.86	0.56	-0.02	1.19	-117	46.11	19.81	31.79	36.19	11.33	-2.61	-1.03447
YKL182W	FAS1	322	40.8	0.13	1.72	20.41	-111	31.43	24.18	16.01	18.95	44.57	47.08	-1.37607
YKL191W	DPH2	21	-15.32	-0.73	-27.35	-19.02	-18	-23.27	20.87	60.59	45.02	1.01	-7.46	-1.45159
YKL195W	MIA40	23	7.81	0.34	19.33	25.16	-19	25.03	37.31	21.21	-12.8	-2.45	21.09	1.13162
YKR025W	RPC37	33	6.92	0.21	6.92	9.32	-26	10.81	7.55	1.82	13.66	21.91	5.28	1.16023
YKR028W	SAP190	119	0.83	0.01	1.21	1.33	-85	5.16	10.27	8.52	12.39	6.42	-0.42	-2.11622
YKR051W		118	35.96	0.3	4.49	0.7	-56	22.73	-2.53	5.41	5.41	-3.76	2.94	-2.47898
YKR074W	AIM29	32	6.69	0.21	6.69	-1.1	-22	17.76	-21.22	-6.38	-6.1	-7.31	16.81	1.24348
YKR079C	TRZ1	18	-3.4	-0.19	-4.15	-3.75	N/A	N/A	13.17	18.16	5.88	-6.45	-9.45	-1.44316
YKR094C	RPL40B	19	-26.24	-1.38	-35.8	-25.41	-18	-35.8	19.49	38.18	44.14	34.34	42.79	1.08073
YKR100C	SKG1	277	-1.66	-0.01	11.26	-1.21	-273	15.42	-4.07	-7.77	4.45	3.76	1.76	-3.29356
YLL010C	PSR1	244	83.29	0.34	12.7	6.51	-63	27.68	11.43	20.1	16.85	16.83	22.96	-2.05236
YLL013C	PUF3	273	46.23	0.17	2.14	-0.63	-74	26.52	4.56	-5.55	0.09	10.19	6.05	-2.26837
YLL019C	KNS1	458	23.35	0.05	0.93	7.21	-35	20.83	4.84	1.14	-1.01	8.41	4.3	-1.38575
YLL026W	HSP104	41	21.69	0.53	17.62	19.74	-33	22.93	14.41	9.01	18.26	14.5	13.02	1.0355
YLL048C	YBT1	180	46.01	0.26	-10.38	41.9	-18	33.68	33.99	4.39	-5.19	5	6.05	-2.77432
YLR019W	PSR2	207	38.54	0.19	2.58	17.52	-56	23.35	-0.62	7.51	16.66	15.69	21.49	-1.8409
YLR023C	IZH3	113	-0.15	0	10.8	8.03	-89	16.64	12.89	-0.33	4.48	5.32	3.06	-1.872
YLR027C	AAT2	27	-1.96	-0.07	-7.9	11.5	-18	6.74	28.02	44.45	18.71	-12.74	18.66	1.07843
YLR028C	ADE16	192	31.09	0.16	4.71	20.28	-77	21.55	42.13	14.2	-17.2	9.36	21.29	-1.64985
YLR052W	IES3	33	-6.44	-0.2	-2.64	-12.88	-32	-2.64	2.49	3.59	13.77	17.32	8.07	1.29558
YLR073C	RFU1	58	25.86	0.45	11.41	24.31	-20	22.91	29.03	25.79	-0.08	3.94	13.37	-1.53439
YLR078C	BOS1	55	0.45	0.01	-1.08	8.33	-31	6.69	7.92	6.88	-3.41	-5.67	2.47	-1.48663
YLR083C	EMP70	78	14.77	0.19	-10.2	65.3	-20	65.33	44.44	8.13	8.16	27.47	24.54	-2.72407
YLR130C	ZRT2	145	39.53	0.27	9.48	4.16	-124	36.41	7.17	11.24	-16.79	-78.34	-38.45	-2.04532
YLR138W	NHA1	165	-10.76	-0.07	-2.02	-16.64	-36	14.83	2.57	8.13	9.68	10.32	10.96	-1.15914
YLR147C	SMD3	15	6.82	0.45	13.48	N/A	N/A	N/A	11.07	10.95	5.05	11.06	19.86	1.52794
YLR167W	RPS31	60	-53.07	-0.88	-24.84	-25.98	-56	-18.88	-7.1	-0.64	-3.67	16.18	40.84	1.14624
YLR188W	MDL1	75	6.54	0.09	3.51	14.06	-21	6.95	9.39	-0.98	2.83	0.96	6.69	-2.05334
YLR190W	MMR1	51	5.9	0.12	-0.05	6.32	-30	7.76	5.81	16.78	21.23	11.2	1.86	-2.59698
YLR194C		124	6.4	0.05	9.52	3.23	-119	15.29	3.01	-10.57	0.37	20.74	25.84	1.24024
YLR200W	YKE2	34	3.98	0.12	4.91	-2.04	-24	7.19	0.21	5.35	4.84	2.52	-1.05	1.54008
YLR206W	ENT2	106	21.54	0.2	7.51	9.44	-35	11.62	16.49	14.99	17.69	18.25	18.89	-1.95106
YLR216C	CPR6	34	27.44	0.81	33.19	-19.41	-33	33.19	-16.09	3.52	18.86	12.19	-16.35	1.21516
YLR219W	MSC3	197	14.22	0.07	5.15	2.14	-189	7.15	7.02	11.3	2.06	-2.87	-2.06	-1.75798
YLR262C-A	TMA7	17	24.52	1.44	39.93	41.72	N/A	N/A	-1.73	-18.94	9.76	1.58	-8.28	1.47908
YLR291C	GCD7	27	31.48	1.17	41.41	51.8	-18	55.92	18.86	-4.49	2.66	33.87	23.89	-2.23699
YLR292C	SEC72	22	0.22	0.01	-10.37	-6.8	-18	-6.45	-21.3	5.33	27.35	36.8	19.41	1.44407
YLR301W		40	4.42	0.11	0.27	10	-19	17.41	4.37	13.68	21.36	26.88	38.79	1.03485
YLR305C	STT4	15	-2.98	-0.2	7.45	N/A	N/A	N/A	0.93	-1.34	8.29	4.81	18.75	-1.38039
YLR310C	CDC25	88	-0.83	-0.01	-5.05	0.77	-31	4.65	3.34	2.98	1.35	2.45	4.55	-1.40414
YLR332W	MID2	424	122.13	0.29	-4.29	6.17	-184	45.19	3.87	12.81	14.44	15.38	14.47	-1.32282
YLR342W	FKS1	259	63.07	0.24	6.88	39.5	-18	41.27	45.82	20.86	28.46	46.52	29.39	-2.79892
YLR347C	KAP95	149	-43.31	-0.29	2.36	-13.47	-76	14.45	22.95	12.09	-10.93	-1.67	0.36	-1.31156
YLR353W	BUD8	53	5.49	0.1	0.14	8.22	-20	7.62	-8.6	-15.42	-0.55	9.45	11.09	-1.9061
YLR378C	SEC61	207	123.58	0.6	-0.75	-4.56	-130	49.63	22.84	24.84	18.87	14.61	28.44	-1.92604
YLR384C	IKI3	61	-7.11	-0.12	-3.1	1.07	-18	1.07	-5.47	-4.32	-12.26	-9.68	5.87	-1.11626
YLR403W	SFP1	334	40.29	0.12	23	7.43	-231	23.4	18.64	19.52	4.6	13.07	20.42	-2.51235
YLR410W	VIP1	47	6.56	0.14	3.72	4.84	-34	8.32	6.1	8.32	3.09	0.71	5.19	-2.32832
YLR420W	URA4	26	-4.68	-0.18	-8.83	-15.57	-25	-8.83	-9.87	-0.06	17.25	10.61	4.12	1.0454
YLR421C	RPN13	31	-16.27	-0.52	-16.27	-20.89	-30	-16.27	-7.64	-5.13	1.8	-2.57	9.82	1.27459
YLR427W	MAG2	96	-5.35	-0.06	-5.52	1.07	-61	7.08	2.76	7.04	-3.05	-5.19	3.48	-1.6064
YLR450W	HMG2	157	17.47	0.11	4.46	6.14	-30	18.1	1.85	0.22	-5.81	4.73	19.38	-2.67852
YML018C		151	32.69	0.22	-3.55	30.31	-27	26.84	5.83	-16.12	2.42	20.55	24.48	-2.66886
YML035C	AMD1	144	-16.64	-0.12	0.28	1.36	-73	0.62	-6.2	-2.01	13.68	15.2	22.21	-2.41732
YML038C	YMD8	98	29.21	0.3	20.92	7.29	-91	23.74	4.2	1.69	-5.31	2.8	24.51	-1.27249
YML052W	SUR7	34	3.48	0.1	-0.36	-16.73	-26	5.76	-7.35	16.21	14.79	10.33	22.85	1.10241
YML056C	IMD4	310	84.25	0.27	-4.29	-49.96	-270	39.79	-19.86	24.09	23.42	22.74	15.12	-1.48322
YML092C	PRE8	23	5.06	0.22	4.9	-3.02	-22	4.9	-3.81	14.31	8.29	17.27	30.14	1.47843
YML106W	URA5	220	6.11	0.03	1.18	-9.33	-82	35.82	36.72	38.35	2.34	0.49	28.39	-1.48415
YML115C	VAN1	47	8.29	0.18	9.65	-2.15	-46	9.65	3.02	-8.5	-10.17	10.58	24.12	-2.6565
YMR002W	MIC17	63	-15.99	-0.25	19.13	-14.77	-62	19.13	33.38	31.38	0.89	-6.44	30.93	1.23008
YMR010W		275	44.01	0.16	3.64	17.4	-18	25.99	20.52	8.69	0.81	17.57	21.47	-2.28983
YMR013C	SEC59	108	0.28	0	1.07	-3.55	-55	3.62	2	22.64	17.23	-8.27	-7.86	-2.16464
YMR026C	PEX12	115	6.66	0.06	-4.38	13.03	-67	11.29	5.61	-0.12	5.01	0.68	-5.14	-2.22895
YMR047C	NUP116	77	17.67	0.23	11.61	13.84	-72	13.31	15.79	19.26	28.7	16.55	16.4	-1.495
YMR054W	STV1	53	1.38	0.03	1.24	7.36	-21	6.38	20.04	21.05	13.85	6.55	4.24	-2.38541
YMR058W	FET3	44	45.65	1.04	41.41	-1.41	-37	44.81	23.78	40.06	7.63	29.57	66.49	-2.26483
YMR062C	ARG7	25	-11.12	-0.44	-11.65	-17.99	-24	-11.65	-5.5	8.22	2.7	-5.67	-0.65	1.17026
YMR080C	NAM7	81	24.95	0.31	4.05	11.76	-52	21.57	14.26	0.3	2.3	15.28	12.26	-1.24924
YMR088C	VBA1	75	22.83	0.3	14.3	16.63	-68	22.91	8.68	0.86	1.18	3.97	3.51	-1.43403
YMR089C	YTA12	117	13.69	0.12	8.63	-11.95	-49	14.44	6.81	6.06	6.79	25.82	20.5	-2.22415
YMR119W	ASI1	193	-10.16	-0.05	-1.14	4.55	-102	5.45	2.84	1.05	8.84	4.53	9.71	-1.76216
YMR121C	RPL15B	96	12.54	0.13	1.07	16.88	-20	19.67	27.85	9.58	-4.32	12.85	18.07	1.15151
YMR126C	DLT1	78	6.01	0.08	1.54	4.46	-61	8.01	6.07	0.63	-2.45	-6.37	-7.93	-2.71097
YMR139W	RIM11	213	96.38	0.45	2.63	15.21	-38	46.77	9.32	13.93	6.12	2.84	20.69	-2.04763
YMR171C	EAR1	198	2.53	0.01	-4.38	0.38	-115	5.48	-2.09	-13.45	-0.43	15.4	25.89	-1.52834
YMR212C	EFR3	127	63.1	0.5	21.67	29.5	-27	34.37	5.15	-2.96	8.47	21.46	23.1	-2.99137
YMR214W	SCJ1	19	-11.19	-0.59	-20.26	-25.19	-18	-20.26	-8.12	4.28	-1.95	-12.02	-1.03	1.17658
YMR216C	SKY1	189	2.77	0.01	2.14	3.31	-50	7.11	10.9	6.04	9.85	5.05	-6.3	-2.01685
YMR223W	UBP8	43	0.87	0.02	-0.3	12.05	-18	4.82	19.94	5.89	3.95	1.39	4.39	-1.72891
YMR226C		32	2.16	0.07	4.55	-6.61	-23	12.98	-4.95	-0.38	19.9	22.6	-13.62	1.03987
YMR229C	RRP5	108	10.28	0.1	-8.17	7.88	-60	16.46	17.1	11.54	12.24	16.17	0.53	-1.30796
YMR237W	BCH1	52	-4.16	-0.08	-6.44	20.62	-18	14.2	2.42	-6.23	7.79	11.36	6.43	-1.75843
YMR238W	DFG5	128	7.7	0.06	1.45	16.58	-40	22.32	7.78	-17.35	0.26	19.14	29.89	-2.04906
YMR241W	YHM2	137	68.41	0.5	22.78	15.39	-120	33.79	21.74	15.7	7.58	20.02	29.62	-1.23102
YMR262W		46	-2.35	-0.05	3.9	-6.53	-45	3.9	14.63	22.35	13.51	8.48	3.9	-2.23502
YMR276W	DSK2	24	28.26	1.18	39.89	19.25	-22	40.24	8.8	17.51	22.6	9.51	15.63	1.29971
YMR277W	FCP1	88	19	0.22	9.46	2.4	-75	15.97	15.16	21.59	22.92	16.29	5.3	-2.07383
YMR303C	ADH2	49	-7.91	-0.16	0	10.66	-18	7.66	12.71	-1.24	5.62	2.62	-2.51	1.06791
YMR308C	PSE1	127	6.72	0.05	22.38	-17.11	-118	25.42	-8.59	5.62	-4.89	-8.83	9.65	-2.32431
YNL005C	MRP7	47	-8.27	-0.18	-0.85	-4.5	-39	-0.25	2.63	2.83	19.61	17.42	-1.79	-1.63251
YNL007C	SIS1	122	-5.18	-0.04	5.26	7.72	-39	19.25	6.73	16.36	29.78	19.62	7.37	1.30368
YNL070W	TOM7	64	5.33	0.08	1.38	21.85	-18	18.95	25.78	26.8	6.17	-13.04	-14.85	1.27625
YNL079C	TPM1	32	1.32	0.04	-0.66	-8.65	-28	1.58	14.97	29.61	2.02	-11.55	-18.07	1.27905
YNL080C	EOS1	90	30.31	0.34	1.21	12.16	-23	18.95	15.71	17.63	12.25	6.1	15	-1.53377
YNL085W	MKT1	251	3.77	0.02	1.14	14.89	-119	16.59	11.88	2.98	8.43	7.78	11.42	-2.25034
YNL090W	RHO2	150	40.88	0.27	14.97	21.02	-103	31.45	10.75	2.97	26.09	32.09	3.74	-2.77799
YNL101W	AVT4	176	-27.12	-0.15	-14.93	4.63	-58	11.14	12.68	13.84	2.35	-3.46	9.06	-2.72376
YNL137C	NAM9	96	1.73	0.02	-0.36	4.55	-36	6.15	3.81	-2.41	-13.48	-6.79	5.42	-1.55886
YNL154C	YCK2	319	11.24	0.04	5.62	19.82	-119	22.7	36.66	21.08	10.86	35.5	34.91	-1.64762
YNL161W	CBK1	174	13.34	0.08	-2.51	8.81	-34	10.43	9.95	10.69	19.63	24.42	24.28	-1.76731
YNL208W		35	-15.92	-0.45	-14.57	5.05	-21	6.52	52.89	10.71	-7.04	-11.61	17.14	1.46164
YNL238W	KEX2	261	25.71	0.1	2.2	0.72	-94	13.85	6.52	5.45	13.93	15.3	2.7	-1.37473
YNL243W	SLA2	51	3.33	0.07	-4.99	23.7	-19	26.59	21.01	2.67	-3.83	13.79	31.41	-1.57517
YNL256W	FOL1	87	0.92	0.01	-0.93	7.06	-30	7.93	8.87	7.63	-0.41	-1.17	0.02	-1.15586
YNL280C	ERG24	76	25.23	0.33	17.01	-17.91	-41	22.85	-17.37	3.99	15.59	-1.42	14.42	-1.14296
YNL287W	SEC21	191	110.73	0.58	16.4	41.25	-34	38.48	11.24	9.73	15.1	-0.09	1.63	-2.50782
YNL291C	MID1	218	71.44	0.33	7.11	-2.3	-95	27.18	3.89	2.57	2.62	4.4	17.14	-1.7449
YNL307C	MCK1	168	97.07	0.58	3	-1.34	-37	51.26	-6.35	25.27	59.36	58.53	13.65	-1.81175
YNR016C	ACC1	546	141.02	0.26	1.27	18.8	-189	39.83	24.59	16.28	-17.76	-30.54	-5.65	-1.30447
YNR030W	ALG12	71	34.37	0.48	19.11	12.63	-63	20.36	12.49	14.87	13.26	20.49	18.99	-1.47977
YNR046W	TRM112	39	20.65	0.53	15.95	-5.05	-32	18.31	-7.23	27.66	24.09	1.44	24.89	1.13352
YNR051C	BRE5	713	105.05	0.15	-3.29	-3.59	-56	23.02	8.95	11.9	16.35	20.29	19.79	-3.54768
YOL004W	SIN3	204	8.76	0.04	2.74	4.72	-131	10.13	3.9	8.99	8.04	7.17	0.24	-2.19905
YOL005C	RPB11	28	-23.48	-0.84	-23.38	7.91	-18	3.15	38.4	34.64	22.62	27.48	35.25	1.11
YOL013C	HRD1	151	7.61	0.05	-6.31	4.05	-104	11.06	3.85	-6.24	-0.46	0.68	-8.41	-1.59788
YOL013W-A		36	0	0	0	0	-35	0	0	-5.38	-19.73	-22.11	-7.95	2.14908
YOL036W		389	60.57	0.16	8.69	13.4	-19	17.21	17.85	14.9	3.15	1.77	12.33	-1.69479
YOL086C	ADH1	40	22.94	0.57	28.91	20.76	-36	40.98	-3.83	26.68	72.34	41.6	5.68	1.28172
YOL097C	WRS1	27	-1.31	-0.05	-3.88	13.42	-18	11.37	26.62	30.81	27.58	1.91	-4.54	1.11603
YOL098C		76	20.72	0.27	0.45	15.23	-21	22.21	18.57	22.45	-7.28	-11.56	-9.71	-1.76727
YOL103W	ITR2	207	8.79	0.04	-4.8	36.45	-19	30.6	5.78	-4.08	4.79	10.52	11.73	-1.42416
YOL109W	ZEO1	40	2.28	0.06	14.95	9.85	-36	16.34	26.05	60.91	59.36	-4.18	-20.22	1.20631
YOL136C	PFK27	207	48.42	0.23	10.58	2.8	-191	20.99	4.61	8.54	5.9	2.51	1.73	-1.98353
YOL143C	RIB4	49	-23.62	-0.48	24.01	-82.18	-48	24.01	-32.34	11.61	29.6	7.24	13.02	1.05644
YOR008C	SLG1	212	38.68	0.18	7.28	12.45	-72	30.39	18.44	11.63	1.69	1.66	3.08	-2.37186
YOR014W	RTS1	236	61.2	0.26	4.36	4.66	-123	28.86	1.07	-0.89	1.21	-1.79	-3.89	-1.47632
YOR043W	WHI2	71	8.63	0.12	6.97	-0.22	-24	10.58	12.82	14.61	7.9	3.87	14.46	-2.23429
YOR045W	TOM6	37	18.63	0.5	20.57	-0.23	-36	20.57	8.99	12.39	35.44	27.65	-21.2	1.31408
YOR065W	CYT1	290	50.35	0.17	4.23	7.33	-35	19.06	10.03	11.88	19.82	32.96	28.91	-1.27672
YOR085W	OST3	53	59.98	1.13	51.14	-9.71	-48	53.97	1.96	25.28	14.38	17.5	16.82	-1.71881
YOR086C	TCB1	182	17.82	0.1	3.58	6.26	-34	23	1.56	-9.09	0.2	8.69	0.78	-2.57935
YOR090C	PTC5	169	10	0.06	0	16.09	-20	18.19	8.6	-12.51	-2.21	21.71	6.43	-2.17248
YOR098C	NUP1	55	7.37	0.13	5.38	-1.22	-43	15.9	5.82	1.18	1.31	3.21	5.79	-1.39518
YOR099W	KTR1	70	68.08	0.97	4.53	22.17	-45	70.32	28.18	11.19	5.05	31.92	31.78	-1.61441
YOR109W	INP53	93	14.67	0.16	-0.79	9.29	-63	13.19	-2.03	2.29	8.27	6.59	-2.04	-2.96424
YOR116C	RPO31	247	29.88	0.12	0	0.6	-67	27.67	11.82	7.49	9.24	7.64	7.29	-2.6599
YOR142W	LSC1	205	100.9	0.49	5.38	12.96	-191	45.45	18.18	18.89	27.4	27.42	12.66	-1.68354
YOR151C	RPB2	258	-12.23	-0.05	-2.68	4.28	-187	17.27	12.7	6.72	12.48	26.99	17.92	-2.07971
YOR165W	SEY1	14	-2	-0.14	-0.93	N/A	N/A	N/A	-0.08	-15.45	-12.44	18.09	4.01	-1.16533
YOR175C	ALE1	76	72.91	0.96	33.25	53.56	-28	48.59	20.28	-15.19	-28.65	-7.85	5.65	-1.53601
YOR204W	DED1	22	2.82	0.13	-2.38	2.95	-18	-1.64	-6.5	-5.14	2.65	4.09	17.68	1.09369
YOR231W	MKK1	87	9.17	0.11	-5.62	4	-47	12.6	10.81	16.22	25.65	33.77	25.87	-1.86107
YOR243C	PUS7	28	-2.86	-0.1	-1.79	20.03	-18	17.06	16.7	15.76	29.31	20.22	1.18	-1.51219
YOR259C	RPT4	22	-3.95	-0.18	0.76	2.88	-18	2.38	8.16	13.31	11.37	22.81	39.06	1.07157
YOR270C	VPH1	164	48.04	0.29	4.66	14.2	-103	26.15	15.53	18.27	21.94	28.43	40.73	-1.92016
YOR273C	TPO4	97	14.72	0.15	4.99	-3.69	-80	18.66	14.47	15.44	14.64	6.36	5.17	-1.11543
YOR291W	YPK9	48	-1.51	-0.03	-3.91	12.15	-20	12.24	-1.8	-10.44	0.5	-9.45	3.96	-1.9348
YOR298C-A	MBF1	51	-1.93	-0.04	3.96	2.48	-39	18.56	1.68	-30.14	8.17	15.2	23.88	1.2624
YOR316C	COT1	142	2.32	0.02	-5.24	12.01	-21	14.8	11.57	14.24	11.52	7.25	8.66	-1.48884
YOR320C	GNT1	94	20.92	0.22	-1.16	-23.93	-53	20.37	-13.73	-1.09	8.91	12.33	4.66	-1.4881
YOR322C	LDB19	239	15.21	0.06	3.19	-1.48	-142	9.8	11.84	24.97	15.02	0.35	1.93	-1.49153
YOR323C	PRO2	19	-1.45	-0.08	21.2	25.48	-18	21.2	30.13	11.83	-8.06	-11.31	6.19	1.07345
YOR326W	MYO2	193	53.06	0.27	9.51	21.27	-22	37.03	-0.42	1.98	9.93	10.79	12.35	-2.17738
YOR335C	ALA1	98	29.1	0.3	8.18	22.62	-18	26.72	27.91	21.03	18.06	23.7	6.75	-1.14086
YOR341W	RPA190	103	5.17	0.05	4.96	26.95	-18	21.75	35.45	14.48	18.24	17.01	-7.1	-2.35046
YOR347C	PYK2	100	-15.51	-0.16	-1.26	-31.97	-67	9.21	-4.61	-5.47	1.91	13.79	9.25	-1.61086
YOR355W	GDS1	111	38.06	0.34	6.51	20.14	-18	21.18	8.6	9.86	14.72	19.65	27.36	-2.46834
YOR360C	PDE2	222	57.74	0.26	-1.08	21.38	-21	27.99	22.4	13.12	12.16	11.81	-0.26	-3.68031
YOR370C	MRS6	302	27.89	0.09	-30.05	10.48	-73	25.39	21.16	19.03	11.04	12.85	26.1	-2.62127
YPL004C	LSP1	50	33.04	0.66	3.51	33.85	-18	38.13	-6.71	-6.41	22.08	27.3	19.19	1.11699
YPL006W	NCR1	57	14.46	0.25	3.31	3.83	-28	12.82	1.32	3.07	7.85	8.92	4.35	-2.03165
YPL023C	MET12	120	2.53	0.02	2.55	-1.71	-37	10.61	6.69	2.75	8.06	-1.73	-10.97	-2.19522
YPL032C	SVL3	186	51.9	0.28	7.12	13.48	-34	22.74	10.75	12.01	10.91	14.05	14.12	-2.09361
YPL036W	PMA2	97	2.14	0.02	0	-4.74	-32	3.8	-2.23	4.9	8.15	7.08	1.07	-1.31673
YPL050C	MNN9	124	34.29	0.28	28.36	12.66	-122	30.05	-13.33	-8.98	15.84	18.82	-1.51	-1.43506
YPL058C	PDR12	170	-7.68	-0.05	-3.08	7.82	-44	5.31	-9.56	-11.74	11.85	18.3	19.95	-2.19621
YPL063W	TIM50	109	47.09	0.43	20.26	23.92	-93	24.39	16.02	7.27	2.83	11.73	22.01	-1.62449
YPL094C	SEC62	13	10.27	0.79	37.9	N/A	N/A	N/A	41.24	30.22	-3.74	16.14	7.86	-1.715
YPL111W	CAR1	48	-10.12	-0.21	-9.27	2.35	-33	1.42	24.49	17.98	18.78	14.63	-9.64	1.12188
YPL116W	HOS3	19	1.67	0.09	4.88	3.95	-18	4.88	-2.18	-8.43	-4.23	-0.43	-3.21	-2.25716
YPL126W	NAN1	27	41.49	1.54	53.65	53.44	-22	62.66	22.55	1.56	9.58	15.7	18.03	-1.3375
YPL127C	HHO1	35	-4.49	-0.13	-5.56	10.02	-18	6.4	31.17	1.28	-5.47	22.35	30.74	1.10764
YPL145C	KES1	238	92.39	0.39	0.7	13.28	-90	39.59	1.72	14.01	19.23	15.04	27.35	-1.72586
YPL184C	MRN1	178	11.48	0.06	0	4.58	-41	7.15	4.69	1.49	3.35	1.21	0.88	-2.11103
YPL203W	TPK2	164	29.29	0.18	8.12	1.01	-59	16.07	7.12	0.9	-2.93	5	10.63	-2.33053
YPL204W	HRR25	210	-9.64	-0.05	-5.56	-10.65	-177	4.94	-13.82	3.2	17.08	24.43	19.43	-1.32989
YPL215W	CBP3	25	4.1	0.16	6.24	6.31	-19	8.14	8.16	2.8	-0.25	8.73	22.9	1.18552
YPL221W	FLC1	22	-28.13	-1.28	-44.22	-48.44	-19	-42.6	2.76	26.39	15.1	-15.28	-27.79	-1.8153
YPL232W	SSO1	180	49.77	0.28	13.25	0.67	-157	29.11	10.52	14.52	10.8	6.62	6.42	-1.1662
YPL244C	HUT1	45	-7.11	-0.16	-6.22	1.43	-24	4.68	-2.74	-5.3	-5.74	3.25	26.38	-1.75294
YPL247C		77	-1.96	-0.03	7.57	-11.54	-75	9.67	-2.51	-6.02	-4.11	3.66	9.03	-1.343
YPL254W	HFI1	233	28.45	0.12	5.62	-0.15	-110	25.35	1.15	3.63	-0.13	-2.23	-9.98	-3.38269
YPL265W	DIP5	94	26.16	0.28	10.32	24.87	-18	28.1	19.98	2.67	1.91	25.66	25.67	-1.32338
YPR019W	MCM4	122	7.17	0.06	-0.93	2.26	-41	9.43	0.8	6.01	10.66	10.66	6.56	-1.42225
YPR024W	YME1	112	47.81	0.43	4.32	3.12	-35	41.21	-15.34	-8.85	-12.74	7.87	17.11	-1.24545
YPR105C	COG4	100	14.52	0.15	6.55	2.59	-84	10.97	4.59	4.51	4.79	4.36	1.37	-1.40776
YPR114W		51	64.45	1.26	52.86	22.21	-50	52.86	28.83	-16.82	-21.34	17.04	20.5	-1.5756
YPR138C	MEP3	211	38.1	0.18	-3.91	23.09	-18	24.17	4.12	-8.55	-2.41	1.02	-10.88	-1.61377
YPR159W	KRE6	285	83.77	0.29	1.73	8.56	-73	36.6	24.68	31.2	25.6	20.46	13.77	-2.35333
YPR166C	MRP2	39	-4.3	-0.11	-7.74	2.41	-31	6.99	3.29	11.13	31.27	41.01	27.46	1.80526
