# Supplementary material for: Genome-wide analysis of translational efficiency reveals distinct but overlapping functions of yeast DEAD-box RNA helicases Ded1 and eIF4A
Source: HighWire-hosted journal article supplement (doi:10.1101/gr.191601.115), 2015-06-29
Supplement: Supplemental_File_S2.xlsx [file Supplemental_File_S2.xlsx]

## Sheet: ded1-ts _all expression
#YORF	Gene	ribo_WT	ribo_ded1-ts	mrna_WT	mrna_ded1-ts	Δribo ded1-ts	ΔmRNA ded1-ts	ΔTE ded1-ts
Q0075	NA	-28.5	-0.26	4.8	3.89	28.2371	-0.86236	29.0995
Q0085	NA	6.36	5.12	4.3	4.61	-1.23905	0.29999	-1.53904
Q0130	NA	5.77	1.31	6.1	5.4	-4.45834	-0.74665	-3.71169
Q0275	NA	7.69	6.73	5.4	5.18	-0.95643	-0.22833	-0.7281
YAL001C	TFC3	8.54	9.1	9	9.11	0.554673	0.0915	0.46318
YAL002W	VPS8	7.64	7.43	8.7	9.24	-0.204319	0.51756	-0.72188
YAL003W	EFB1	13.96	13.78	12.1	11.59	-0.172291	-0.47819	0.3059
YAL005C	SSA1	16.74	17.28	13.2	13.46	0.542635	0.25174	0.29089
YAL007C	ERP2	10.22	9.63	8.8	7.93	-0.58795	-0.83129	0.24334
YAL008W	FUN14	8.92	9.54	7.4	7.59	0.616844	0.17506	0.44179
YAL009W	SPO7	6.49	5.58	7.7	8.04	-0.907263	0.37647	-1.28373
YAL010C	MDM10	7.48	7.77	7.8	7.92	0.288417	0.12161	0.16681
YAL011W	SWC3	7.22	7.59	7.9	8.03	0.377271	0.12918	0.24809
YAL012W	CYS3	12.15	11.56	10.5	9.48	-0.586032	-0.97978	0.39375
YAL013W	DEP1	8.56	8.66	9.1	9.12	0.103917	0.06562	0.03829
YAL014C	SYN8	7.71	8.13	8.6	8.77	0.415522	0.21381	0.20171
YAL015C	NTG1	7.49	7.91	8.7	8.8	0.421158	0.11004	0.31112
YAL016W	TPD3	10.58	10.04	10.2	10.43	-0.542604	0.22041	-0.76301
YAL017W	PSK1	9.48	9.13	9.4	9.87	-0.350342	0.4947	-0.84504
YAL019W	FUN30	9.5	9.67	9.4	9.64	0.168384	0.25795	-0.08957
YAL020C	ATS1	7.39	7.34	8.8	9.07	-0.049067	0.23044	-0.2795
YAL021C	CCR4	9.94	9.81	9.2	9.32	-0.132693	0.16815	-0.30085
YAL022C	FUN26	9.09	7.92	9.8	9.72	-1.17272	-0.12357	-1.04915
YAL024C	LTE1	8.02	7.47	7.9	7.81	-0.541014	-0.05847	-0.48254
YAL025C	MAK16	9.44	8.86	9.1	9.11	-0.574729	-0.04031	-0.53442
YAL026C	DRS2	9.52	9.6	9.2	9.49	0.082802	0.28889	-0.20609
YAL028W	FRT2	5.62	7.26	7.1	7.75	1.63211	0.61916	1.01295
YAL029C	MYO4	9.62	9.22	9.8	9.98	-0.401689	0.16596	-0.56765
YAL030W	SNC1	8.35	8.58	7.1	6.9	0.234988	-0.2414	0.47639
YAL031C	GIP4	7.55	8.05	8.5	8.67	0.496341	0.12751	0.36883
YAL032C	PRP45	7.03	7.4	7.9	8.34	0.372054	0.39756	-0.0255
YAL033W	POP5	8.32	8.03	8.3	7.91	-0.29461	-0.38567	0.09106
YAL034C	FUN19	6.93	9	7.1	7.79	2.07147	0.73581	1.33566
YAL034W-A	MTW1	6.61	6.51	6.9	6.41	-0.100987	-0.50793	0.40694
YAL035W	FUN12	11.99	11.82	11	11.08	-0.163496	0.08119	-0.24468
YAL036C	RBG1	10.32	10.04	10.1	9.79	-0.2765	-0.27149	-0.00501
YAL037W		4.55	5.01	6.6	6.59	0.461841	-0.03954	0.50138
YAL038W	CDC19	16.75	16.69	14.2	13.97	-0.056741	-0.25152	0.19478
YAL039C	CYC3	8.19	8.13	8.7	8.93	-0.064497	0.19888	-0.26337
YAL040C	CLN3	8.39	8.15	8.4	8.87	-0.235238	0.48146	-0.71669
YAL041W	CDC24	9.25	9.46	9.4	9.87	0.20702	0.43091	-0.22389
YAL042W	ERV46	10.6	10.45	10.4	10.29	-0.143839	-0.10223	-0.04161
YAL043C	PTA1	9.24	9.21	9.5	9.35	-0.035227	-0.18696	0.15173
YAL044C	GCV3	11.31	10.87	10.4	9.7	-0.446088	-0.6736	0.22752
YAL044W-A		8.27	9.7	7.7	8.2	1.42627	0.50489	0.92139
YAL046C	AIM1	8.43	9.24	7.7	7.62	0.811395	-0.11768	0.92908
YAL047C	SPC72	6.96	7.93	7.7	7.72	0.969834	0.04643	0.9234
YAL048C	GEM1	7.42	7.92	8	8.57	0.498544	0.55645	-0.0579
YAL049C	AIM2	9.19	8.91	9	8.63	-0.2773	-0.32122	0.04392
YAL051W	OAF1	8.72	9.43	8.8	9.29	0.701896	0.52351	0.17839
YAL053W	FLC2	10.37	10.5	10.2	10.42	0.137555	0.2205	-0.08294
YAL054C	ACS1	5.08	7.12	7	7.86	2.04727	0.8409	1.20637
YAL055W	PEX22	7.29	7.85	6.9	7.23	0.555455	0.33325	0.2222
YAL056W	GPB2	7.4	7.74	9.3	9.77	0.345824	0.45009	-0.10427
YAL058W	CNE1	8.49	8.83	9	9.18	0.344366	0.20667	0.13769
YAL059W	ECM1	8.45	8.2	8.3	7.86	-0.253487	-0.4438	0.19031
YAL060W	BDH1	10.32	10.25	9.9	9.22	-0.06865	-0.68962	0.62097
YAL061W	BDH2	9.04	8.27	8.6	8.09	-0.776936	-0.51369	-0.26324
YAL062W	GDH3	6.13	7.23	7.6	8.68	1.10106	1.04715	0.05391
YAL063C	FLO9	4.7	7.32	7.7	8.92	2.62064	1.19989	1.42074
YAL063C-A		1.79	-27.12	4.8	4.56	-28.9133	-0.28919	-28.6242
YAL064W-B		1.38	2.73	4.1	5.21	1.35231	1.09413	0.25818
YAL065C		1.38	3.05	5.2	6.35	1.67429	1.1763	0.498
YAL067C	SEO1	4.04	4.85	6.3	5.61	0.807199	-0.70397	1.51117
YAR002C-A	ERP1	10.84	10.78	9.9	9.07	-0.055546	-0.87442	0.81887
YAR002W	NUP60	9.15	8.54	9.5	9.19	-0.609172	-0.28975	-0.31942
YAR003W	SWD1	7.88	7.8	8.6	8.5	-0.07732	-0.11092	0.0336
YAR007C	RFA1	9.82	9.28	9.2	8.83	-0.533109	-0.33476	-0.19835
YAR008W	SEN34	6.79	5.86	7.5	6.97	-0.93125	-0.57398	-0.35727
YAR009C		13.82	14.29	14.7	15.54	0.462338	0.80242	-0.34008
YAR010C		14.57	15.09	13	14.1	0.52258	1.08335	-0.56077
YAR014C	BUD14	8.78	7.72	9.3	9.68	-1.05246	0.42282	-1.47527
YAR015W	ADE1	10.21	9.72	9.7	9.4	-0.480581	-0.27062	-0.20996
YAR018C	KIN3	8.13	7.15	8.7	7.71	-0.979904	-0.99811	0.01821
YAR019C	CDC15	7.29	8.18	7.7	8.29	0.89059	0.53933	0.35126
YAR023C		3.88	4.64	6.4	6.9	0.7572	0.53527	0.22193
YAR027W	UIP3	9.12	9.5	8.8	8.75	0.386422	-0.05721	0.44363
YAR028W		8.35	8.52	8.7	8.34	0.166458	-0.34736	0.51382
YAR029W		-28.5	-0.27	6	6.18	28.2267	0.14876	28.0779
YAR031W	PRM9	7.8	8.14	8.1	8.09	0.336368	-0.02847	0.36484
YAR033W	MST28	7.01	7.12	7.4	7.39	0.108394	-0.04928	0.15767
YAR035W	YAT1	6.87	6.84	8.2	8.36	-0.024652	0.17416	-0.19881
YAR042W	SWH1	9.83	9.72	9.5	9.59	-0.104841	0.12343	-0.22827
YAR050W	FLO1	4.7	6.64	8	8.65	1.94745	0.68446	1.26299
YAR068W		5.88	4.94	5.1	5.34	-0.942634	0.22405	-1.16668
YAR071W	PHO11	7.31	6.71	9	8.15	-0.605451	-0.83687	0.23142
YBL001C	ECM15	10.21	11.34	8.8	9.19	1.13264	0.35488	0.77776
YBL002W	HTB2	11.94	9.18	11.3	8.79	-2.76195	-2.46467	-0.29729
YBL003C	HTA2	11.82	9.22	11.5	8.43	-2.60224	-3.05856	0.45631
YBL004W	UTP20	10.75	10.76	10	10.15	0.010464	0.19345	-0.18298
YBL005W	PDR3	7.29	8.58	8.1	8.72	1.28832	0.66701	0.62131
YBL006C	LDB7	8.21	8.68	8.8	9.17	0.463107	0.31615	0.14696
YBL009W	ALK2	8.36	7.44	8.6	7.87	-0.921774	-0.74383	-0.17794
YBL010C		6.92	6.58	7.6	7.06	-0.334987	-0.52313	0.18815
YBL013W	FMT1	7.07	6.73	5.9	5.8	-0.338116	-0.14558	-0.19254
YBL014C	RRN6	6.11	5.82	8.6	9.01	-0.297225	0.38422	-0.68144
YBL015W	ACH1	9.27	9.88	8.6	9.08	0.612856	0.46305	0.14981
YBL016W	FUS3	8.41	8.28	9	8.88	-0.129643	-0.14646	0.01682
YBL017C	PEP1	10.95	9.49	10.1	10.29	-1.4626	0.15502	-1.61762
YBL018C	POP8	7.67	7.78	8	8.01	0.108781	0.0343	0.07448
YBL019W	APN2	6.71	7.3	8	8.42	0.586987	0.38052	0.20647
YBL020W	RFT1	8.58	7.38	9	9.15	-1.20209	0.14975	-1.35184
YBL021C	HAP3	7	6.56	7.3	7.05	-0.44111	-0.27343	-0.16768
YBL022C	PIM1	10.6	10.95	9.5	9.97	0.349417	0.50508	-0.15566
YBL023C	MCM2	9.28	8.84	9.1	8.77	-0.433621	-0.31989	-0.11374
YBL024W	NCL1	10.69	9.76	10	9.65	-0.932363	-0.36886	-0.5635
YBL025W	RRN10	7.02	6.81	6.9	6.36	-0.208376	-0.52627	0.31789
YBL026W	LSM2	8.71	8.01	7.9	6.99	-0.703495	-0.91841	0.21491
YBL027W	RPL19B	13.69	13.49	12.8	12.3	-0.199729	-0.47979	0.28006
YBL028C		8.99	8.38	8	7.24	-0.603652	-0.73197	0.12832
YBL029C-A		7.56	8.3	7.2	7.08	0.740114	-0.07471	0.81482
YBL029W		5.98	6.74	6.4	5.73	0.757378	-0.65299	1.41037
YBL030C	PET9	12.43	11.89	9.8	9.63	-0.535412	-0.17835	-0.35706
YBL031W	SHE1	6.94	6.51	7.1	6.3	-0.432347	-0.77851	0.34617
YBL032W	HEK2	10.18	8.31	9.5	8.6	-1.87489	-0.911	-0.96389
YBL033C	RIB1	8.79	9.01	8.9	9.28	0.215068	0.41405	-0.19898
YBL035C	POL12	8.42	7.84	8.6	8.39	-0.580581	-0.21582	-0.36476
YBL036C		9.21	9.35	9.1	8.82	0.143659	-0.25876	0.40242
YBL037W	APL3	8.74	8.84	8.6	8.43	0.103923	-0.16195	0.26587
YBL038W	MRPL16	8.69	8.76	8.4	8.18	0.064417	-0.21589	0.28031
YBL039C	URA7	11.64	10.78	10.8	10.59	-0.85643	-0.21552	-0.64091
YBL039W-B		5.41	5.4	5.5	5.65	-0.006135	0.13704	-0.14318
YBL040C	ERD2	9.9	9.88	9.3	9.1	-0.02042	-0.15231	0.13189
YBL041W	PRE7	10.58	10.8	9.8	9.97	0.213702	0.16904	0.04467
YBL042C	FUI1	9.49	9.03	10.1	10.69	-0.466617	0.60628	-1.0729
YBL043W	ECM13	4.88	7.97	4.8	7.81	3.08847	3.02617	0.06231
YBL045C	COR1	11.25	11.2	10.2	10.19	-0.044413	-0.01958	-0.02484
YBL046W	PSY4	8.21	7.91	8.6	8.34	-0.299328	-0.24343	-0.0559
YBL047C	EDE1	11.81	11.15	9.8	10.49	-0.656952	0.64434	-1.30129
YBL049W	MOH1	5.43	8.26	5.5	8.16	2.82671	2.6197	0.20701
YBL050W	SEC17	9.87	10.03	9.3	9.54	0.159028	0.19604	-0.03701
YBL051C	PIN4	9.25	9.77	7.9	8.44	0.516354	0.538	-0.02164
YBL052C	SAS3	6.56	5.79	8.7	8.67	-0.766932	-0.00632	-0.76061
YBL054W	TOD6	8	8.33	9.1	9.54	0.326003	0.40353	-0.07753
YBL055C		8.22	8.39	9	9.3	0.171093	0.27799	-0.1069
YBL056W	PTC3	10.1	10.07	10	9.83	-0.027112	-0.11911	0.09199
YBL057C	PTH2	9.21	9.15	9	8.43	-0.061585	-0.60917	0.54759
YBL058W	SHP1	10.28	10.24	9.9	9.99	-0.045658	0.13815	-0.18381
YBL059C-A	CMC2	7.92	7.33	6.9	6.32	-0.591134	-0.56288	-0.02826
YBL059W		7.02	7.16	6.9	6.26	0.141101	-0.60756	0.74866
YBL060W	YEL1	7.28	7.49	8.6	8.79	0.206061	0.2406	-0.03454
YBL061C	SKT5	8.75	8.14	9.5	9.35	-0.606232	-0.12767	-0.47857
YBL063W	KIP1	7.52	7.48	7.5	7.06	-0.035764	-0.45442	0.41865
YBL064C	PRX1	10	11.38	9.2	9.9	1.38004	0.68657	0.69347
YBL066C	SEF1	7.02	7.45	7	8.08	0.425945	1.03052	-0.60458
YBL067C	UBP13	8.2	8.16	8.6	8.93	-0.040221	0.34064	-0.38086
YBL068W	PRS4	9.09	8.76	9.2	8.82	-0.32451	-0.3962	0.07169
YBL069W	AST1	8.89	8.42	9.2	8.72	-0.469659	-0.43936	-0.0303
YBL071W-A	KTI11	9.23	9.38	8.1	8.14	0.143923	-0.00366	0.14758
YBL072C	RPS8A	14.47	14.24	13.9	13.24	-0.228002	-0.62798	0.39997
YBL074C	AAR2	7.27	7.93	7.5	7.84	0.669288	0.34503	0.32426
YBL075C	SSA3	5.92	7.64	9	9.28	1.72315	0.24072	1.48244
YBL076C	ILS1	13.05	13.06	11.6	11.53	0.014264	-0.06388	0.07815
YBL078C	ATG8	7.43	8.69	6.2	7.2	1.26143	1.00167	0.25975
YBL079W	NUP170	9.98	9.12	9.7	9.79	-0.855555	0.09153	-0.94709
YBL080C	PET112	7.21	7.53	8	8.13	0.317232	0.10421	0.21302
YBL081W		8.12	8.2	7.6	7.76	0.079822	0.10841	-0.02859
YBL082C	ALG3	7.98	8.7	9.2	9.17	0.72315	-0.06955	0.7927
YBL084C	CDC27	7.77	8.78	8.3	8.64	1.01335	0.38299	0.63036
YBL085W	BOI1	8.73	8.17	9.1	9	-0.567421	-0.09244	-0.47498
YBL086C		7.55	8.01	7.8	7.88	0.459324	0.11778	0.34154
YBL087C	RPL23A	13.07	12.78	12.4	11.78	-0.293041	-0.60334	0.3103
YBL088C	TEL1	6.98	7.85	8.4	8.97	0.86507	0.58786	0.27721
YBL089W	AVT5	7.97	8.35	8.4	8.79	0.388887	0.34989	0.039
YBL090W	MRP21	7.97	7.62	7.4	7.14	-0.344263	-0.30664	-0.03762
YBL091C	MAP2	10.25	9.72	9.6	9.23	-0.531544	-0.41533	-0.11622
YBL091C-A	SCS22	6.95	7.85	7.4	7.54	0.897272	0.15213	0.74514
YBL092W	RPL32	13.94	13.58	12.6	12.11	-0.359411	-0.43921	0.0798
YBL093C	ROX3	8.38	9.4	9	9.28	1.02125	0.28262	0.73864
YBL095W		6.88	7.82	8.6	8.55	0.938747	-0.01524	0.95399
YBL097W	BRN1	8.14	7.5	7.7	7.21	-0.64098	-0.47356	-0.16742
YBL098W	BNA4	9.37	7.6	9.1	7.27	-1.76049	-1.81994	0.05946
YBL099W	ATP1	12.77	11.3	10.6	10.39	-1.47239	-0.22325	-1.24914
YBL101C	ECM21	9.04	9.39	8.6	9	0.346815	0.44478	-0.09797
YBL102W	SFT2	8.82	9.37	9.1	9.73	0.557882	0.67836	-0.12048
YBL103C	RTG3	7.91	8.14	8.4	8.57	0.227766	0.16232	0.06545
YBL104C		8.08	7.57	8.6	8.55	-0.510368	-0.08277	-0.42759
YBL105C	PKC1	8.97	7.52	9.2	9.62	-1.45015	0.39833	-1.84848
YBL106C	SRO77	7.15	5.01	7.8	7.28	-2.13783	-0.52109	-1.61675
YBL107C		7.66	8.29	7.4	7.62	0.631857	0.20413	0.42773
YBL111C		9	9.88	11.3	11.24	0.880585	-0.06325	0.94384
YBR001C	NTH2	9.47	9.57	9.7	10.06	0.09218	0.36336	-0.27118
YBR002C	RER2	7.81	7.32	8.7	8.73	-0.486897	0.00733	-0.49423
YBR003W	COQ1	8.65	8.45	8.8	8.61	-0.201225	-0.16329	-0.03793
YBR004C	GPI18	8	8.34	8.5	8.56	0.331182	0.10166	0.22952
YBR005W	RCR1	7.56	7.92	7.8	7.83	0.361346	-0.01047	0.37182
YBR006W	UGA2	8.46	9.71	8	8.73	1.24343	0.72292	0.52051
YBR007C	DSF2	7.97	8.53	8.6	8.54	0.553358	-0.03532	0.58868
YBR008C	FLR1	3.49	3.97	9.1	9.04	0.482788	-0.05337	0.53616
YBR009C	HHF1	12.28	9.47	12.3	9.38	-2.80538	-2.88194	0.07657
YBR010W	HHT1	12.63	10.75	12.6	10.05	-1.87718	-2.55242	0.67524
YBR011C	IPP1	13.58	13.25	11.3	10.54	-0.324643	-0.79734	0.47269
YBR013C		7.48	8.24	6.6	7.43	0.755224	0.84176	-0.08653
YBR014C	GRX7	9.41	9.32	8.5	8.07	-0.09144	-0.40606	0.31462
YBR015C	MNN2	10.63	9.39	9.6	9.36	-1.23478	-0.27844	-0.95634
YBR016W		9.07	8.63	7.7	7.48	-0.439713	-0.19143	-0.24828
YBR017C	KAP104	10.94	10.5	10.1	10.13	-0.439017	-0.00499	-0.43402
YBR018C	GAL7	2.6	3.97	6.5	6.12	1.37524	-0.33821	1.71345
YBR019C	GAL10	3.11	5.94	5.3	5.98	2.8282	0.68854	2.13966
YBR020W	GAL1	2.6	3.05	6.3	6.8	0.449081	0.49117	-0.04209
YBR021W	FUR4	8.17	8.02	8.6	8.83	-0.150412	0.22994	-0.38036
YBR022W	POA1	7.97	8.02	7.8	7.98	0.049788	0.2107	-0.16091
YBR023C	CHS3	10	8.08	10.2	10.07	-1.92113	-0.16463	-1.75649
YBR024W	SCO2	7.68	8.12	7.7	8.09	0.440335	0.40072	0.03961
YBR025C	OLA1	12.7	12.59	11.3	10.98	-0.113119	-0.32157	0.20845
YBR026C	ETR1	10.07	10.07	9	8.61	0.006488	-0.38829	0.39478
YBR028C		7.94	6.79	8.5	7.79	-1.14961	-0.68832	-0.46129
YBR029C	CDS1	10.21	9.82	9.4	9.23	-0.389135	-0.16537	-0.22377
YBR030W	RKM3	7.22	6.63	9.2	8.97	-0.58264	-0.2231	-0.35954
YBR031W	RPL4A	15	14.39	14.1	13.4	-0.614813	-0.66314	0.04833
YBR033W	EDS1	4.38	6.68	5.3	6.82	2.30451	1.5156	0.78892
YBR034C	HMT1	9.3	8.77	9.3	9.3	-0.536374	0.01621	-0.55259
YBR035C	PDX3	10.3	10.28	8.9	8.72	-0.013132	-0.16054	0.14741
YBR036C	CSG2	10.66	10.77	10.1	10.22	0.109383	0.16112	-0.05174
YBR037C	SCO1	8.4	7.66	8.2	7.56	-0.740177	-0.60604	-0.13414
YBR038W	CHS2	10.29	8.85	9.1	8.32	-1.44412	-0.73176	-0.71237
YBR039W	ATP3	10.91	11	9.2	9.06	0.090022	-0.13127	0.22129
YBR040W	FIG1	4.18	2.9	6	2.66	-1.2854	-3.37793	2.09252
YBR041W	FAT1	9.66	9.53	9.2	9.02	-0.127762	-0.20948	0.08172
YBR042C	CST26	8.37	8.5	8.7	8.24	0.129161	-0.47003	0.59919
YBR043C	QDR3	7.17	8.86	9.6	10.68	1.6833	1.03702	0.64628
YBR044C	TCM62	6.88	7.27	8.5	8.32	0.393606	-0.19457	0.58818
YBR045C	GIP1	5.15	4.12	6.8	6.44	-1.02782	-0.33496	-0.69286
YBR046C	ZTA1	8.86	9.15	7.6	7.61	0.292216	0.03942	0.2528
YBR047W	FMP23	5.43	6.66	6.2	6.72	1.23128	0.53607	0.69522
YBR048W	RPS11B	13.16	12.93	12.2	11.8	-0.228298	-0.39364	0.16534
YBR049C	REB1	9.85	9.46	8.8	8.69	-0.388037	-0.09752	-0.29052
YBR050C	REG2	4.7	4.67	4.6	5.07	-0.023501	0.44254	-0.46604
YBR052C	RFS1	10.15	10.05	9.4	9.02	-0.10239	-0.40505	0.30266
YBR053C		9.7	9.98	9.1	9.06	0.276779	-0.06499	0.34177
YBR054W	YRO2	12.81	13.87	11.4	11.34	1.05666	-0.04187	1.09853
YBR055C	PRP6	8.14	8.57	9.1	9.24	0.422539	0.11572	0.30682
YBR056W		9.71	10.24	9	9.2	0.531378	0.22998	0.3014
YBR057C	MUM2	8.12	7.48	8.4	8.22	-0.646171	-0.16974	-0.47643
YBR058C	UBP14	9.45	9.52	9.5	9.71	0.070185	0.21943	-0.14925
YBR059C	AKL1	9.76	9.9	8.9	9.66	0.138269	0.7493	-0.61103
YBR060C	ORC2	7.97	7.9	8.8	8.46	-0.070546	-0.30039	0.22984
YBR061C	TRM7	8.46	7.71	8.6	8.45	-0.74413	-0.18037	-0.56376
YBR062C		7.64	7.89	7.6	7.92	0.25219	0.33624	-0.08405
YBR063C		2.79	5.59	8.4	8.76	2.79572	0.36489	2.43083
YBR065C	ECM2	7.35	8.23	7.8	7.78	0.87924	-0.02948	0.90872
YBR066C	NRG2	7.97	6.77	8	7.05	-1.19941	-0.9348	-0.26461
YBR067C	TIP1	12.77	13.74	11	11.06	0.972222	0.05898	0.91325
YBR068C	BAP2	10.56	10.66	11.1	11.65	0.098858	0.57583	-0.47697
YBR069C	TAT1	10.62	10.5	10.9	11.17	-0.125978	0.27118	-0.39716
YBR070C	ALG14	7.82	7.13	8.1	7.01	-0.696575	-1.10054	0.40397
YBR071W		9.11	8.21	8.8	7.73	-0.906381	-1.10299	0.19661
YBR072W	HSP26	11.44	13.83	9.2	11.13	2.39179	1.91158	0.48022
YBR073W	RDH54	9.63	9.44	10	9.78	-0.186493	-0.17691	-0.00958
YBR074W		10.25	10.1	9.7	9.66	-0.151134	-0.07206	-0.07908
YBR076W	ECM8	5.49	4.63	5.5	4.69	-0.866119	-0.77005	-0.09607
YBR077C	SLM4	8.89	8.9	8.6	8.4	0.007967	-0.16379	0.17176
YBR078W	ECM33	14.03	12.98	12.4	11.3	-1.05217	-1.12619	0.07402
YBR079C	RPG1	11.99	11.67	11	10.9	-0.321602	-0.14463	-0.17697
YBR080C	SEC18	10.41	10.26	9.5	9.37	-0.150723	-0.10886	-0.04186
YBR081C	SPT7	8.86	9.09	8.7	9.05	0.231478	0.32655	-0.09507
YBR082C	UBC4	11.5	11.63	10.1	10.13	0.126819	0.01898	0.10784
YBR083W	TEC1	9.03	8.52	8.6	8.34	-0.516661	-0.25904	-0.25762
YBR084C-A	RPL19A	13.57	13.54	12.6	12.21	-0.03279	-0.3989	0.36611
YBR084W	MIS1	11.44	10.56	11.1	10.69	-0.87557	-0.36521	-0.51036
YBR085C-A		11.15	11.01	10	9.12	-0.133574	-0.92514	0.79157
YBR085W	AAC3	6.72	6.24	7	6.72	-0.485462	-0.25375	-0.23171
YBR086C	IST2	10.94	8.44	9.8	9.73	-2.50511	-0.08472	-2.42039
YBR087W	RFC5	8.9	7.98	9.2	8.41	-0.918378	-0.83204	-0.08633
YBR088C	POL30	10.44	8.52	9.2	7.48	-1.91909	-1.74132	-0.17777
YBR091C	TIM12	7.64	7.6	7.7	7.28	-0.030831	-0.39269	0.36186
YBR092C	PHO3	12.74	12.61	11.8	11.06	-0.12942	-0.71875	0.58933
YBR093C	PHO5	10.51	10.22	9.7	9.14	-0.288725	-0.58889	0.30017
YBR094W	PBY1	8.99	8.46	8.9	8.77	-0.530274	-0.16692	-0.36335
YBR095C	RXT2	8.13	8.38	8.7	8.62	0.255575	-0.0944	0.34997
YBR096W		10.07	10.55	9.2	9.27	0.48674	0.06583	0.42091
YBR097W	VPS15	8.51	8.54	8.5	8.7	0.024065	0.23842	-0.21435
YBR098W	MMS4	6.67	6.86	7.2	6.99	0.181736	-0.18695	0.36869
YBR101C	FES1	9.67	10.74	9.5	10.12	1.06811	0.60296	0.46515
YBR102C	EXO84	8.26	8.21	8.5	8.6	-0.051611	0.1025	-0.15412
YBR103W	SIF2	8.41	7.83	9.2	9.02	-0.573339	-0.14459	-0.42875
YBR104W	YMC2	7.8	7.99	9.2	9.48	0.184698	0.33011	-0.14541
YBR105C	VID24	7.1	8.52	7.1	8.58	1.41834	1.47803	-0.05969
YBR106W	PHO88	11.98	11.76	11	10.53	-0.222662	-0.47363	0.25097
YBR107C	IML3	4.79	6.56	6.9	6.95	1.76723	0.02719	1.74004
YBR108W	AIM3	8.59	9.22	8	8.83	0.629539	0.82316	-0.19362
YBR109C	CMD1	11.2	10.86	9.7	9.23	-0.33906	-0.42289	0.08383
YBR110W	ALG1	8.79	8.51	9.1	9.03	-0.277627	-0.05776	-0.21987
YBR111C	YSA1	10.23	10.72	9.4	9.05	0.487828	-0.35076	0.83859
YBR111W-A	SUS1	7.46	7.69	6.2	5.96	0.237338	-0.22536	0.4627
YBR112C	CYC8	10.2	9.8	9.4	9.57	-0.399385	0.13808	-0.53747
YBR114W	RAD16	8.09	8.48	8.5	9.41	0.39392	0.92504	-0.53112
YBR115C	LYS2	11.24	11.79	10.2	10.92	0.548014	0.71993	-0.17192
YBR117C	TKL2	6.22	7.18	5.7	6.54	0.964986	0.86565	0.09934
YBR118W	TEF2	18.01	18.01	16.3	15.97	0.007248	-0.30197	0.30922
YBR120C	CBP6	7.11	7.06	6.7	6.08	-0.053254	-0.65412	0.60087
YBR121C	GRS1	12.74	12.21	11.3	10.83	-0.534637	-0.46758	-0.06706
YBR122C	MRPL36	8.5	8.25	8.5	8.17	-0.244226	-0.32228	0.07805
YBR123C	TFC1	8.09	7.54	8.6	7.99	-0.544684	-0.56169	0.01701
YBR125C	PTC4	7.95	7.36	8.8	9.11	-0.586855	0.32949	-0.91635
YBR126C	TPS1	12.29	11.82	10.1	10.07	-0.478335	-0.02861	-0.44972
YBR127C	VMA2	13.24	12.68	11.2	10.73	-0.554718	-0.507	-0.04772
YBR128C	ATG14	5.83	6	6.9	6.9	0.160417	-0.02606	0.18648
YBR129C	OPY1	7.42	7.38	8.1	8.14	-0.042825	0.08924	-0.13207
YBR130C	SHE3	8.64	8.86	8.6	8.34	0.221512	-0.26585	0.48736
YBR131W	CCZ1	7.3	7.93	8.1	8.54	0.636785	0.45946	0.17732
YBR132C	AGP2	8.29	9.11	6.7	7.29	0.825669	0.62725	0.19842
YBR133C	HSL7	8.78	7.8	9.9	9.66	-0.978879	-0.26859	-0.71029
YBR135W	CKS1	8.98	8.66	8	7.93	-0.316357	-0.10701	-0.20935
YBR136W	MEC1	8.46	9.02	8.3	8.81	0.564227	0.50698	0.05725
YBR137W		9.25	9.05	8.4	8.33	-0.20134	-0.11079	-0.09055
YBR138C		7.72	7.18	8.3	7.41	-0.532181	-0.8566	0.32442
YBR139W		11.1	11.7	9.3	9.41	0.598877	0.13631	0.46256
YBR140C	IRA1	9.72	9.17	9.2	9.88	-0.546537	0.68881	-1.23534
YBR141C		6.94	6.52	7.6	7.41	-0.42006	-0.20188	-0.21818
YBR142W	MAK5	9.08	8.76	8.8	9.13	-0.324916	0.2935	-0.61842
YBR143C	SUP45	11.52	10.88	10.7	10.37	-0.636888	-0.368	-0.26889
YBR145W	ADH5	6.81	7.72	7.2	7.54	0.909688	0.30404	0.60565
YBR146W	MRPS9	8.45	8.22	8.2	7.64	-0.22454	-0.54566	0.32112
YBR147W	RTC2	6.3	7.33	7	7.83	1.02757	0.79439	0.23318
YBR149W	ARA1	11.2	11.01	9.7	9.46	-0.186204	-0.29286	0.10665
YBR150C	TBS1	7.7	8.63	6.8	7.49	0.923402	0.66664	0.25676
YBR151W	APD1	8.46	7.36	9.3	9.68	-1.10558	0.35597	-1.46155
YBR152W	SPP381	6.06	6.83	6	6.18	0.773367	0.21971	0.55366
YBR153W	RIB7	6.45	6.63	7.8	7.58	0.185299	-0.22228	0.40758
YBR154C	RPB5	10.08	9.05	9.7	9.1	-1.03423	-0.63569	-0.39854
YBR155W	CNS1	8.44	8.85	8.1	8.03	0.414237	-0.12052	0.53475
YBR156C	SLI15	6.95	6.44	7.6	6.76	-0.511284	-0.82113	0.30984
YBR157C	ICS2	6.64	6.82	7.5	7.46	0.189064	-0.07168	0.26074
YBR158W	AMN1	8.78	9.49	10.9	10.91	0.712905	0.02486	0.68804
YBR159W	IFA38	10.46	10.26	10	9.25	-0.196667	-0.77848	0.58181
YBR161W	CSH1	8.35	8.09	8.7	8.12	-0.259942	-0.55072	0.29077
YBR162C	TOS1	12.56	11.38	11.5	10.71	-1.18147	-0.74361	-0.43786
YBR162W-A	YSY6	8.74	9.31	7.9	7.75	0.574383	-0.17889	0.75327
YBR163W	EXO5	5.7	6.15	8.4	8.28	0.455097	-0.15023	0.60533
YBR164C	ARL1	9.41	8.67	8.9	8.27	-0.741858	-0.5792	-0.16266
YBR165W	UBS1	8.05	8.35	8.3	8.38	0.303692	0.0415	0.26219
YBR166C	TYR1	9.33	9.11	9.2	9.29	-0.211422	0.11186	-0.32328
YBR167C	POP7	6.45	6.56	6.4	6.7	0.107811	0.3076	-0.19978
YBR168W	PEX32	6.49	5.87	8.3	8.2	-0.6164	-0.08721	-0.52919
YBR169C	SSE2	10.53	12.03	8.9	9.64	1.50315	0.76144	0.7417
YBR170C	NPL4	9.49	10.11	9.1	9.63	0.614395	0.49797	0.11642
YBR171W	SEC66	9.08	8.98	8.5	7.94	-0.103429	-0.59805	0.49462
YBR172C	SMY2	8.96	7.33	9.2	9.51	-1.62898	0.28502	-1.914
YBR173C	UMP1	9.25	9.63	8.3	8.38	0.384612	0.05264	0.33197
YBR175W	SWD3	7.62	7.75	9	9.15	0.124483	0.12898	-0.0045
YBR176W	ECM31	8.41	8.5	8.2	8.05	0.094693	-0.13262	0.22731
YBR177C	EHT1	10.64	10.41	9.8	9.46	-0.228271	-0.36883	0.14056
YBR179C	FZO1	8.38	8.52	8.5	8.56	0.142932	0.01605	0.12688
YBR181C	RPS6B	14.53	14.14	13.7	13.03	-0.39698	-0.64668	0.2497
YBR182C	SMP1	6.48	8.18	8.1	8.96	1.70516	0.82661	0.87855
YBR183W	YPC1	8.13	9.1	7.5	7.61	0.971848	0.15533	0.81652
YBR184W		6.33	5.75	7.2	6.53	-0.582422	-0.70205	0.11963
YBR185C	MBA1	8.23	7.58	7.9	7.82	-0.657866	-0.04235	-0.61551
YBR186W	PCH2	4.88	5.97	5.4	5.92	1.09561	0.54599	0.54962
YBR187W	GDT1	10.06	8.21	10	9.58	-1.85677	-0.45769	-1.39908
YBR188C	NTC20	7.2	8.19	7.1	7.55	0.994311	0.46923	0.52509
YBR189W	RPS9B	13.97	13.41	13	12.27	-0.552832	-0.69972	0.14689
YBR191W	RPL21A	13.64	13.37	12.2	11.67	-0.262731	-0.50148	0.23875
YBR192W	RIM2	7.75	6.07	8.4	8.17	-1.68453	-0.20385	-1.48068
YBR193C	MED8	7.44	8.07	7.5	7.36	0.631966	-0.17644	0.80841
YBR194W	AIM4	6.67	7.34	6.5	7.11	0.668965	0.61863	0.05034
YBR195C	MSI1	7.63	7.51	8.5	8.5	-0.118781	0.02699	-0.14577
YBR197C		6.76	6.68	7.6	7.55	-0.076994	-0.09527	0.01828
YBR198C	TAF5	9.21	8.79	9.3	9.46	-0.419796	0.20127	-0.62107
YBR199W	KTR4	10.1	10.92	10.1	10.37	0.818201	0.28387	0.53433
YBR200W	BEM1	7.98	8.38	8.6	8.74	0.393789	0.13681	0.25698
YBR201W	DER1	7.74	7.68	7.6	8.05	-0.058161	0.40389	-0.46205
YBR202W	MCM7	9.51	8.7	9.9	9.24	-0.808709	-0.62029	-0.18842
YBR203W	COS111	6.45	7.43	6.8	8.08	0.981829	1.31225	-0.33042
YBR204C		7.81	8.36	7.7	8.07	0.547982	0.38122	0.16676
YBR205W	KTR3	10.15	10.25	9.6	9.16	0.100815	-0.47405	0.57486
YBR207W	FTH1	9	9.23	8.9	9	0.227759	0.06931	0.15845
YBR208C	DUR1,2	8.23	10.07	8.5	9.33	1.83745	0.79904	1.03841
YBR210W	ERV15	7.72	8.12	7.2	7.26	0.403646	0.05016	0.35349
YBR211C	AME1	7.73	7.33	8.3	8.07	-0.398566	-0.22381	-0.17475
YBR212W	NGR1	8.76	8.68	8	8.34	-0.080808	0.30345	-0.38425
YBR213W	MET8	7.23	6.9	7.3	6.89	-0.337234	-0.43465	0.09742
YBR214W	SDS24	9.11	10.11	8.2	9.09	0.998444	0.87935	0.1191
YBR215W	HPC2	7.74	8.1	8.4	8.3	0.353949	-0.11911	0.47306
YBR216C	YBP1	8.72	8.83	8.7	8.64	0.103775	-0.03807	0.14185
YBR217W	ATG12	5.92	6.95	6.9	7.07	1.02732	0.17417	0.85315
YBR218C	PYC2	11.77	10.66	10.3	10.84	-1.11342	0.56837	-1.68179
YBR221C	PDB1	11.86	11.65	10.3	10.18	-0.206992	-0.15641	-0.05058
YBR222C	PCS60	10.18	10.16	9.5	9.68	-0.017841	0.13729	-0.15513
YBR223C	TDP1	6.49	7.17	7.8	8.43	0.676137	0.60169	0.07445
YBR225W		7.74	8.41	7.4	7.78	0.665201	0.32944	0.33576
YBR227C	MCX1	8.49	8.96	8.1	8.38	0.460462	0.27058	0.18988
YBR228W	SLX1	6.66	7.62	7.3	7.81	0.964757	0.47588	0.48888
YBR229C	ROT2	10.32	11.39	9.1	9.48	1.06343	0.34142	0.722
YBR230C	OM14	9.74	9.77	8.3	7.84	0.033336	-0.47726	0.51059
YBR230W-A		7.03	8.55	6.1	6.89	1.52401	0.83743	0.68657
YBR231C	SWC5	7.27	8.02	8.3	8.63	0.750803	0.37284	0.37796
YBR233W	PBP2	7.92	7.63	8.1	7.58	-0.292981	-0.53364	0.24066
YBR233W-A	DAD3	7.02	6.7	6.7	5.94	-0.314626	-0.77679	0.46217
YBR234C	ARC40	10.71	10.78	9.1	9.3	0.072462	0.23189	-0.15943
YBR235W		8.38	9.22	8.9	9.38	0.846237	0.50448	0.34175
YBR236C	ABD1	8.6	8.67	9.1	9.01	0.068899	-0.11696	0.18586
YBR237W	PRP5	7.22	7.66	8.9	9.32	0.434584	0.45007	-0.01548
YBR238C		8.33	9.15	7	7.63	0.814509	0.68029	0.13422
YBR239C	ERT1	6.89	7.31	7.4	7.49	0.424874	0.058	0.36688
YBR240C	THI2	6	6.9	7.1	7.44	0.903075	0.39036	0.51272
YBR241C		9	10.72	8.4	9.32	1.72408	0.96862	0.75545
YBR242W		8.18	7.14	8.8	8.37	-1.03343	-0.40519	-0.62824
YBR243C	ALG7	9.59	9.21	8.7	8.04	-0.381038	-0.66899	0.28795
YBR244W	GPX2	7.85	7.59	8.1	8.08	-0.260351	-0.04597	-0.21438
YBR245C	ISW1	10.02	9.84	8.9	8.54	-0.182192	-0.38184	0.19965
YBR246W	RRT2	8.06	8.13	8.7	8.57	0.068438	-0.09738	0.16582
YBR247C	ENP1	9.52	9.04	9	9.09	-0.480735	0.04512	-0.52585
YBR248C	HIS7	10.33	10.44	10.1	10.15	0.11692	0.068	0.04892
YBR249C	ARO4	11.76	11.82	10.9	10.73	0.060032	-0.20004	0.26008
YBR250W	SPO23	4.88	6.75	6.7	6.68	1.86908	0.00137	1.86771
YBR251W	MRPS5	8.29	7.88	8.3	8.11	-0.410451	-0.20307	-0.20739
YBR252W	DUT1	9.85	9.12	9.2	8.05	-0.730408	-1.12575	0.39534
YBR253W	SRB6	7.84	8.33	8.2	8.02	0.492088	-0.19896	0.69105
YBR254C	TRS20	7.97	7.58	7.8	7.4	-0.391686	-0.38792	-0.00376
YBR255C-A		5.46	7.04	5.4	5.88	1.58063	0.45372	1.12691
YBR255W	MTC4	7.27	8.23	8	8.62	0.959522	0.63658	0.32294
YBR256C	RIB5	9.34	10.41	9.5	9.82	1.06923	0.34167	0.72756
YBR257W	POP4	7.49	7.67	7.9	7.87	0.178413	-0.03766	0.21607
YBR258C	SHG1	6.48	6.65	7	6.55	0.169482	-0.4503	0.61978
YBR259W		6.48	6.86	8.4	8.46	0.379163	0.03285	0.34632
YBR260C	RGD1	8.42	8.68	8.7	8.77	0.258814	0.09709	0.16172
YBR261C	TAE1	9.36	9.46	8.6	8.47	0.100237	-0.10533	0.20557
YBR262C	AIM5	7.82	8.4	7.3	7.45	0.575162	0.16649	0.40867
YBR263W	SHM1	11.52	10.27	10.2	9.94	-1.24842	-0.23875	-1.00967
YBR264C	YPT10	7.56	7.64	7.6	7.53	0.08599	-0.12129	0.20728
YBR265W	TSC10	9.09	8.18	9.1	8.62	-0.911352	-0.45372	-0.45763
YBR267W	REI1	8.92	8.39	9.4	9.2	-0.526702	-0.16019	-0.36651
YBR268W	MRPL37	8.18	8.01	7.8	7.7	-0.167993	-0.13073	-0.03726
YBR269C	FMP21	8.69	9.26	7.8	7.6	0.57297	-0.15493	0.7279
YBR270C	BIT2	5.28	5.97	8.3	8.57	0.691988	0.28572	0.40627
YBR271W		7.38	7.29	8.5	8.41	-0.094378	-0.09109	-0.00328
YBR272C	HSM3	8.18	8.19	8.9	8.65	0.011679	-0.28272	0.2944
YBR273C	UBX7	9.1	9.29	8.8	8.9	0.191672	0.1282	0.06347
YBR274W	CHK1	7.44	7.74	8.4	8.6	0.294991	0.19843	0.09656
YBR275C	RIF1	8.9	8.18	8.7	8.77	-0.718423	0.03677	-0.75519
YBR276C	PPS1	7.12	6.53	9.2	9.49	-0.588312	0.32486	-0.91317
YBR278W	DPB3	7.14	7.36	7.7	7.75	0.225426	0.0378	0.18763
YBR279W	PAF1	9.04	9	9.1	8.88	-0.04564	-0.20752	0.16188
YBR280C	SAF1	7.67	8.44	7.5	7.99	0.777804	0.46582	0.31198
YBR281C	DUG2	9.12	9.01	8.8	8.71	-0.117884	-0.07038	-0.0475
YBR282W	MRPL27	8	7.7	7.6	7.05	-0.295623	-0.52263	0.227
YBR283C	SSH1	11.43	10.09	10.6	10.61	-1.34364	-0.01196	-1.33169
YBR284W		5.54	6.54	7.2	7.18	0.998763	-0.03875	1.03751
YBR285W		5.94	6.06	4.6	4.04	0.123805	-0.61077	0.73457
YBR286W	APE3	13.1	12.84	11.6	10.68	-0.257382	-0.89283	0.63545
YBR287W		10.1	10.93	9.7	9.74	0.824516	0.07587	0.74865
YBR288C	APM3	9.01	8.47	9	8.7	-0.538253	-0.25121	-0.28705
YBR289W	SNF5	9.15	9.05	9.1	8.74	-0.100563	-0.37273	0.27217
YBR290W	BSD2	8.47	8.85	8.4	8.61	0.381308	0.22961	0.1517
YBR291C	CTP1	7.02	6.94	8.5	8.73	-0.083878	0.19518	-0.27906
YBR293W	VBA2	6.18	8.23	8.8	9.47	2.05199	0.66245	1.38954
YBR294W	SUL1	3.11	4.13	3.7	4.88	1.01306	1.13901	-0.12595
YBR295W	PCA1	4.54	6.53	8.7	9.36	1.98073	0.69478	1.28595
YBR297W	MAL33	5.72	6.61	6.2	6.94	0.886085	0.77229	0.11379
YBR298C	MAL31	-0.21	3.63	7.7	8.77	3.84356	1.06665	2.77691
YBR299W	MAL32	5.11	5.01	5.6	5.53	-0.104663	-0.10533	0.00067
YBR301W	PAU24	1.79	3.18	4.5	4.59	1.39091	0.04701	1.3439
YBR302C	COS2	10.61	10.97	9.9	10.07	0.352822	0.1394	0.21342
YCL001W	RER1	9.27	8.89	8.5	7.72	-0.379486	-0.7603	0.38081
YCL002C		6.02	5.77	7.9	8.04	-0.247937	0.14034	-0.38828
YCL004W	PGS1	6.6	7.79	7.8	8.05	1.18809	0.21011	0.97798
YCL005W	LDB16	7.13	7.57	8.2	8.26	0.442204	0.10452	0.33769
YCL005W-A	VMA9	9.69	9.63	8.2	7.49	-0.065552	-0.68374	0.61819
YCL008C	STP22	8.29	8.69	8	8.45	0.398445	0.3976	0.00084
YCL009C	ILV6	11.52	12.26	10.5	10.73	0.739021	0.24645	0.49257
YCL010C	SGF29	7.57	8.11	8.6	8.63	0.543333	0.03605	0.50729
YCL011C	GBP2	9.4	9.04	10.6	10.5	-0.351131	-0.12569	-0.22544
YCL012C		7.53	8.02	6.3	6.18	0.498704	-0.0999	0.5986
YCL014W	BUD3	9.56	7.9	8.9	8.62	-1.65642	-0.27447	-1.38195
YCL016C	DCC1	7.39	6.8	8.6	8.7	-0.589707	0.07864	-0.66835
YCL017C	NFS1	10.41	10.4	9.2	9.39	-0.014709	0.14815	-0.16286
YCL021W-A		4.25	5.37	6.2	6.16	1.1148	-0.00824	1.12304
YCL024W	KCC4	7.79	8.08	8.6	8.84	0.288185	0.2196	0.06859
YCL025C	AGP1	9.31	9.89	9	9.34	0.582344	0.35153	0.23082
YCL026C-A	FRM2	3.88	3.54	5.1	4.37	-0.336876	-0.76862	0.43175
YCL026C-B	HBN1	8.21	9.78	6	7.41	1.57185	1.43712	0.13473
YCL027W	FUS1	7.15	7.11	7.6	7.37	-0.039233	-0.26234	0.22311
YCL028W	RNQ1	10.78	10.22	8.9	8.78	-0.560177	-0.10006	-0.46012
YCL029C	BIK1	7.48	7.31	8.3	8.4	-0.171507	0.14865	-0.32016
YCL030C	HIS4	12.1	11.54	11.1	10.91	-0.552248	-0.19642	-0.35583
YCL031C	RRP7	8.96	8.91	8.8	9.03	-0.055321	0.22035	-0.27567
YCL032W	STE50	7	7.38	8.2	8.12	0.383158	-0.03914	0.4223
YCL033C	MXR2	9.21	10.06	8.6	8.67	0.854984	0.07174	0.78324
YCL034W	LSB5	9.25	8.58	9.7	9.42	-0.662716	-0.26483	-0.39789
YCL035C	GRX1	10.66	11.43	8.7	8.77	0.77542	0.03689	0.73853
YCL036W	GFD2	8	7.32	10.3	9.97	-0.681914	-0.28137	-0.40054
YCL037C	SRO9	11.76	10.77	9.5	8.94	-0.985639	-0.52334	-0.4623
YCL038C	ATG22	8.34	9.24	8.5	9.19	0.899279	0.69073	0.20855
YCL039W	GID7	8.34	9.16	8.6	9.46	0.815002	0.89181	-0.07681
YCL043C	PDI1	13.85	14.22	12	11.93	0.368468	-0.11391	0.48238
YCL044C	MGR1	8.59	9.11	7.5	7.82	0.514431	0.35304	0.16139
YCL045C	EMC1	11.12	11.07	9.9	9.93	-0.044626	0.01721	-0.06184
YCL049C		7.64	8.42	7.3	7.94	0.789121	0.61201	0.17711
YCL050C	APA1	11	10.99	9.6	9.39	-0.014462	-0.18283	0.16837
YCL051W	LRE1	7.52	6.15	7.9	8.2	-1.3724	0.34668	-1.71908
YCL052C	PBN1	8.13	8.8	8.5	8.63	0.667373	0.18179	0.48559
YCL054W	SPB1	9.66	9.61	9.5	9.84	-0.054496	0.37711	-0.43161
YCL055W	KAR4	8.06	8.11	8.3	8.35	0.048576	0.05049	-0.00192
YCL056C		5.92	6.75	6.9	7.61	0.82941	0.66373	0.16568
YCL057W	PRD1	10.49	10.75	9.8	9.98	0.262052	0.18124	0.08081
YCL058C	FYV5	1.79	3.3	5.3	4.68	1.51378	-0.59778	2.11156
YCL058W-A	ADF1	7.64	7.65	7.2	6.8	0.009974	-0.42868	0.43865
YCL059C	KRR1	9.45	9.08	9.4	9	-0.374344	-0.44039	0.06605
YCL061C	MRC1	7.82	7.81	7.3	7.87	-0.015613	0.5457	-0.56131
YCL063W	VAC17	7.43	6.5	8	7.02	-0.931003	-0.98532	0.05432
YCL064C	CHA1	11.33	10.32	11.9	10.77	-1.01375	-1.1304	0.11666
YCL067C	HMLALPHA2	7.67	8.44	8.9	9.45	0.763216	0.50743	0.25578
YCL068C		5.4	6.36	4.7	4.95	0.955829	0.27716	0.67867
YCL073C		4.75	5.4	5.6	5.41	0.651473	-0.14799	0.79947
YCR002C	CDC10	10.09	9.36	9.4	8.72	-0.730923	-0.65531	-0.07562
YCR003W	MRPL32	7.84	8.04	7.7	7.21	0.200936	-0.48538	0.68632
YCR004C	YCP4	11.21	10.8	9.4	8.94	-0.40531	-0.46435	0.05904
YCR005C	CIT2	10.42	10.99	13.1	13.09	0.573231	-0.04635	0.61958
YCR007C		6.78	7.2	7	7.45	0.423687	0.43567	-0.01199
YCR008W	SAT4	8.9	8.11	9.9	9.76	-0.788508	-0.09473	-0.69377
YCR009C	RVS161	10.22	9.9	9.4	9.12	-0.313447	-0.31441	0.00096
YCR011C	ADP1	10.51	10.95	10.1	10.37	0.436983	0.23807	0.19891
YCR012W	PGK1	16.67	17.31	14.6	14.4	0.646944	-0.18465	0.8316
YCR014C	POL4	2.96	4.63	7.7	7.85	1.67062	0.18737	1.48325
YCR015C		6.88	7.51	7.2	7.72	0.629485	0.5606	0.06889
YCR016W		8.34	7.68	8.1	7.71	-0.663166	-0.37148	-0.29169
YCR017C	CWH43	10.55	10.9	9.3	10.09	0.349507	0.74762	-0.39811
YCR018C	SRD1	7.74	9.21	8.3	8.69	1.46352	0.39803	1.06549
YCR019W	MAK32	7.25	7.38	7.9	8.21	0.133579	0.3079	-0.17432
YCR020C	PET18	4.55	5.63	7.4	7.7	1.08661	0.27515	0.81146
YCR020C-A	MAK31	7.78	8.49	6.7	6.79	0.708353	0.07634	0.63202
YCR020W-B	HTL1	7.94	7.9	6.4	6.12	-0.044448	-0.23704	0.19259
YCR021C	HSP30	8.27	11.09	7.2	8.19	2.8281	1.00591	1.82219
YCR023C		7.98	7.57	8.9	8.61	-0.41551	-0.28354	-0.13197
YCR024C	SLM5	7.17	7.3	6.8	6.85	0.137431	0.05349	0.08394
YCR026C	NPP1	8.82	8.69	9.2	9.26	-0.127086	0.10455	-0.23164
YCR027C	RHB1	7.6	7.28	7.8	7.91	-0.320063	0.11064	-0.4307
YCR028C	FEN2	8.25	7.61	8.8	8.99	-0.644152	0.2074	-0.85156
YCR028C-A	RIM1	10.32	9.83	8.4	7.81	-0.491972	-0.57748	0.08551
YCR030C	SYP1	9.85	9.91	8.7	8.94	0.056427	0.21336	-0.15693
YCR031C	RPS14A	14.07	13.79	12.6	12.16	-0.27725	-0.46237	0.18512
YCR032W	BPH1	8.38	9.29	8.5	9.21	0.905933	0.73483	0.1711
YCR033W	SNT1	8.33	8.45	9.1	9.53	0.116752	0.39247	-0.27572
YCR034W	FEN1	11	9.68	9.9	8.71	-1.32742	-1.16501	-0.1624
YCR035C	RRP43	8.98	8.89	9.1	8.83	-0.090485	-0.25252	0.16203
YCR036W	RBK1	8.76	8.68	9.1	9.13	-0.076685	-0.00495	-0.07173
YCR037C	PHO87	9.23	9.29	9.4	9.45	0.057587	0.08402	-0.02644
YCR042C	TAF2	9.58	10.27	9.7	10	0.691732	0.28186	0.40987
YCR044C	PER1	8.42	9.24	8.5	8.54	0.827907	0.04707	0.78083
YCR046C	IMG1	8.73	8.48	8	7.88	-0.257023	-0.13019	-0.12684
YCR047C	BUD23	8.81	8.57	9.3	9.26	-0.244912	-0.01904	-0.22587
YCR048W	ARE1	9.26	9.46	9.6	9.88	0.200079	0.28739	-0.08731
YCR051W		9.64	9.44	9	9.04	-0.194054	0.03749	-0.23154
YCR052W	RSC6	9.06	9.03	9.4	9.22	-0.030528	-0.16834	0.13781
YCR053W	THR4	12.33	12.26	10.7	10.72	-0.072344	-0.01177	-0.06057
YCR054C	CTR86	8.7	8.42	8.7	8.67	-0.286544	-0.02714	-0.25941
YCR057C	PWP2	10.07	9.22	10.1	10.29	-0.844104	0.15234	-0.99644
YCR059C	YIH1	7.81	8.83	9.3	9.55	1.01877	0.28609	0.73268
YCR060W	TAH1	7.76	8.65	8.2	8.46	0.884174	0.26104	0.62313
YCR061W		10.23	11.37	7.9	8.75	1.13819	0.81678	0.32142
YCR063W	BUD31	6.04	6.62	6.7	6.44	0.580255	-0.24266	0.82291
YCR065W	HCM1	8.92	6.87	9	8.11	-2.0583	-0.92168	-1.13662
YCR066W	RAD18	7.21	7.18	8	7.91	-0.025341	-0.12192	0.09658
YCR067C	SED4	10.06	10.53	9.5	9.58	0.474134	0.05434	0.4198
YCR068W	ATG15	8.26	9.59	7.9	8.62	1.3353	0.75144	0.58386
YCR069W	CPR4	9.4	9.27	9	9.14	-0.128772	0.15214	-0.28091
YCR071C	IMG2	7.87	8.28	6.9	6.72	0.402618	-0.16341	0.56603
YCR072C	RSA4	9.07	8.58	9.7	9.65	-0.485792	-0.08853	-0.39726
YCR073C	SSK22	5.92	6.81	8	8.01	0.893439	-0.00733	0.90077
YCR073W-A	SOL2	9.45	9.41	8.9	8.87	-0.039827	-0.00448	-0.03535
YCR075C	ERS1	7.98	7.27	8.4	7.36	-0.710814	-1.03136	0.32054
YCR075W-A		7.43	7.74	5.8	5.93	0.311036	0.1786	0.13244
YCR076C		8.15	8.44	8.1	8.31	0.29406	0.1934	0.10066
YCR077C	PAT1	10.11	9.84	9.4	9.57	-0.272173	0.12965	-0.40182
YCR079W	PTC6	5.98	6.24	7.4	8.21	0.256973	0.76281	-0.50583
YCR081W	SRB8	8.31	8.67	7.6	8.1	0.360399	0.47313	-0.11273
YCR082W	AHC2	8.96	10.35	8.1	8.88	1.39827	0.82632	0.57195
YCR083W	TRX3	8.84	10.02	7.7	8.42	1.18666	0.70838	0.47828
YCR084C	TUP1	10.92	9.29	10.1	9.96	-1.63341	-0.184	-1.44941
YCR086W	CSM1	8.21	7.66	7.7	7.26	-0.552407	-0.45797	-0.09443
YCR087C-A		8.35	8.74	8.3	8.3	0.39413	-0.02009	0.41422
YCR088W	ABP1	11.75	11.37	8.8	8.54	-0.371019	-0.27942	-0.0916
YCR089W	FIG2	4.92	6.97	8.2	8.86	2.04651	0.69798	1.34853
YCR090C		9.06	8.42	8.8	8.03	-0.641281	-0.74639	0.10511
YCR091W	KIN82	6.5	7.57	7	7.26	1.06538	0.26563	0.79975
YCR092C	MSH3	8.61	8.89	9	8.96	0.281047	-0.02784	0.30888
YCR093W	CDC39	11.15	11.17	9	9.53	0.021645	0.5682	-0.54655
YCR094W	CDC50	8.51	8.42	8	8.01	-0.09552	-0.00171	-0.09381
YCR095C	OCA4	7.49	8.36	8.5	8.83	0.873674	0.32948	0.5442
YCR096C	HMRA2	5.57	5.83	8.4	8.78	0.261648	0.4203	-0.15865
YCR097W	HMRA1	7.99	8.81	7.9	7.55	0.820682	-0.35187	1.17255
YCR098C	GIT1	5.18	6.26	6.5	7.64	1.08053	1.1395	-0.05897
YCR101C		3.96	3.53	4.5	5.03	-0.427635	0.51728	-0.94492
YCR102C		2.6	2.54	6	6.74	-0.06222	0.70708	-0.7693
YCR104W	PAU3	0.79	2.05	4.4	4.72	1.25921	0.30331	0.9559
YCR107W	AAD3	2.38	3.53	8	8.4	1.15759	0.4436	0.71399
YDL001W	RMD1	7.55	7.56	8.6	8.18	0.006361	-0.39373	0.40009
YDL002C	NHP10	7.99	8	8.2	7.9	0.012292	-0.25049	0.26278
YDL003W	MCD1	9.3	7.13	8.8	6.64	-2.16779	-2.17689	0.0091
YDL004W	ATP16	10.37	10.39	8.7	8.43	0.022246	-0.29984	0.32209
YDL005C	MED2	8.73	9.11	8.2	8.15	0.384228	-0.01203	0.39625
YDL006W	PTC1	8.19	7.97	8.6	8.97	-0.216253	0.32392	-0.54017
YDL007W	RPT2	10.35	10.53	10	10.29	0.17764	0.25362	-0.07598
YDL008W	APC11	7.61	7.55	7.2	6.75	-0.057178	-0.43375	0.37657
YDL010W	GRX6	8.94	8.64	7.6	7.36	-0.299706	-0.28511	-0.0146
YDL012C		8.62	8.33	7.7	7.73	-0.287714	0.04512	-0.33283
YDL013W	SLX5	7.83	7.96	9.3	9.51	0.134719	0.22974	-0.09502
YDL014W	NOP1	11.69	10.77	10.8	10.52	-0.92004	-0.31607	-0.60397
YDL015C	TSC13	10.74	10.54	9.7	9.24	-0.207778	-0.47318	0.2654
YDL017W	CDC7	7.86	8.02	8.3	8.4	0.159674	0.09623	0.06345
YDL018C	ERP3	8.42	8.08	7.7	7.06	-0.337333	-0.62739	0.29006
YDL019C	OSH2	9.56	8.34	9.3	9.64	-1.21826	0.33967	-1.55793
YDL020C	RPN4	9.23	10.65	9.4	10.6	1.42144	1.23595	0.1855
YDL021W	GPM2	9.21	9.29	8.6	8.28	0.082586	-0.31685	0.39944
YDL022W	GPD1	12.93	11.77	9.6	8.88	-1.15956	-0.75886	-0.40071
YDL024C	DIA3	4.92	6.91	5.8	6.13	1.98612	0.32165	1.66447
YDL025C	RTK1	7.45	7.65	8.6	9.25	0.1991	0.68736	-0.48826
YDL027C		7.83	8.35	7.9	8.19	0.518222	0.26617	0.25205
YDL028C	MPS1	7.81	7.2	8.3	8.17	-0.611185	-0.13785	-0.47333
YDL029W	ARP2	10.65	10.25	9.9	9.72	-0.403886	-0.20063	-0.20326
YDL030W	PRP9	7.72	7.91	8.6	8.73	0.190473	0.17367	0.0168
YDL031W	DBP10	9.74	10.08	9.6	9.88	0.345172	0.24404	0.10113
YDL033C	SLM3	6.81	6.99	7.9	7.83	0.176343	-0.09407	0.27041
YDL035C	GPR1	7.98	8.58	8.7	9.66	0.596314	0.94542	-0.34911
YDL036C	PUS9	7.64	8.26	8	8.13	0.62223	0.10301	0.51922
YDL037C	BSC1	1.37	4.54	5.3	7.03	3.16777	1.74927	1.41849
YDL039C	PRM7	4.11	5.34	7	8.48	1.22412	1.52204	-0.29792
YDL040C	NAT1	10.72	10.18	10.3	9.89	-0.534867	-0.38957	-0.1453
YDL042C	SIR2	8.05	7.93	8.5	8.16	-0.114606	-0.35799	0.24338
YDL043C	PRP11	7.63	7.51	7.9	7.44	-0.119727	-0.4371	0.31737
YDL044C	MTF2	7.83	7.96	8.3	8.19	0.129441	-0.05823	0.18767
YDL045C	FAD1	8.08	8.92	8.2	8.77	0.835618	0.61597	0.21965
YDL045W-A	MRP10	8.36	8.41	7.3	7.04	0.05051	-0.2836	0.33411
YDL046W	NPC2	9.83	9.9	8.6	8.16	0.073703	-0.4387	0.51241
YDL047W	SIT4	9.24	8.67	8.8	9.01	-0.574563	0.19246	-0.76702
YDL048C	STP4	7.28	7.97	7.1	7.9	0.689257	0.78564	-0.09638
YDL049C	KNH1	5.49	5.67	6	5.35	0.184606	-0.67444	0.85904
YDL051W	LHP1	10.35	9.73	10.3	10.01	-0.615124	-0.29593	-0.3192
YDL052C	SLC1	10.48	10.29	8.8	8.61	-0.189825	-0.23592	0.0461
YDL054C	MCH1	8.66	9.27	8.5	8.89	0.610949	0.3756	0.23535
YDL055C	PSA1	13.92	11.85	12.9	11.66	-2.07036	-1.2403	-0.83006
YDL056W	MBP1	8.21	8.16	8.5	8.55	-0.045646	0.03709	-0.08274
YDL057W		7.02	7.47	7.8	8.07	0.454314	0.30349	0.15082
YDL058W	USO1	10.15	9.33	7.8	8.72	-0.814713	0.88307	-1.69779
YDL059C	RAD59	5.94	6.93	7.1	7.43	0.993733	0.32187	0.67186
YDL060W	TSR1	9.69	9.31	10.3	10.26	-0.378901	-0.05504	-0.32386
YDL061C	RPS29B	11.68	11.34	9.6	9.25	-0.345953	-0.37623	0.03028
YDL063C		8.94	8.59	9.5	9.71	-0.351975	0.16927	-0.52124
YDL064W	UBC9	9.09	8.58	8.3	7.24	-0.510006	-1.03508	0.52507
YDL065C	PEX19	8.51	8.57	8	8.15	0.057624	0.1834	-0.12578
YDL066W	IDP1	11.86	12.02	10.8	10.73	0.154416	-0.03843	0.19285
YDL067C	COX9	8.82	9.31	8	7.8	0.495064	-0.19338	0.68845
YDL069C	CBS1	6.02	7.12	6.7	6.41	1.09761	-0.26913	1.36674
YDL070W	BDF2	8.48	8.54	9.2	9.21	0.051365	0.05752	-0.00616
YDL072C	YET3	10.46	11.06	9.6	9.72	0.602128	0.13305	0.46907
YDL073W		7.25	7.31	9.3	9.54	0.063616	0.24653	-0.18292
YDL074C	BRE1	9.02	9.35	9.5	9.46	0.328884	-0.06482	0.39371
YDL075W	RPL31A	13.09	12.84	12	11.24	-0.253176	-0.73996	0.48679
YDL076C	RXT3	7.76	7.83	8.8	8.67	0.066564	-0.10122	0.16778
YDL077C	VAM6	8.16	8.42	9.2	9.32	0.250992	0.08045	0.17054
YDL078C	MDH3	10.32	9.77	9.7	9.25	-0.552937	-0.42625	-0.12669
YDL079C	MRK1	4.11	4.11	5.6	5.49	-0.000519	-0.16023	0.15971
YDL080C	THI3	7.23	7.23	9	9.09	-1.6e-05	0.13965	-0.13967
YDL081C	RPP1A	13.26	12.8	12.5	11.73	-0.459282	-0.72401	0.26473
YDL082W	RPL13A	13.39	12.71	11.8	11.3	-0.679958	-0.50277	-0.17719
YDL083C	RPS16B	13.04	12.41	12	11.4	-0.630206	-0.58261	-0.0476
YDL084W	SUB2	12.38	11.42	11.4	10.56	-0.953158	-0.87107	-0.08209
YDL085C-A		7.76	8.5	7.1	6.58	0.736331	-0.54794	1.28427
YDL085W	NDE2	5	6.79	5	5.66	1.79251	0.69765	1.09486
YDL086W		9.86	10.09	9.4	9.41	0.224594	0.03717	0.18743
YDL087C	LUC7	6.84	7.31	6.9	7.12	0.470401	0.1755	0.2949
YDL088C	ASM4	8.5	8.32	9.2	9.2	-0.179954	0.01995	-0.1999
YDL089W	NUR1	7.57	7.76	7.4	7.79	0.197533	0.41653	-0.21899
YDL090C	RAM1	8.07	7.85	8.4	7.8	-0.215206	-0.62198	0.40678
YDL092W	SRP14	9	8.55	8.2	7.75	-0.449351	-0.48888	0.03953
YDL095W	PMT1	12.19	11.15	10.7	10.55	-1.03773	-0.13627	-0.90146
YDL097C	RPN6	10.56	10.91	10.1	10.73	0.35001	0.58599	-0.23598
YDL098C	SNU23	7.23	7.27	7.1	7.01	0.040752	-0.10653	0.14728
YDL099W	BUG1	8.57	8.48	8.5	8.34	-0.0902	-0.18036	0.09016
YDL100C	GET3	11.57	11.34	10.3	9.65	-0.232031	-0.60141	0.36938
YDL101C	DUN1	8.29	7.63	8.7	7.77	-0.660669	-0.95559	0.29492
YDL102W	POL3	9.32	9.13	8.8	8.79	-0.192496	0.03082	-0.22332
YDL103C	QRI1	10.06	9.14	9.2	8.53	-0.923189	-0.67522	-0.24797
YDL104C	QRI7	5.79	6.26	6.9	6.73	0.467573	-0.18625	0.65383
YDL105W	NSE4	6.56	6.07	7.1	6.76	-0.490113	-0.31093	-0.17918
YDL106C	PHO2	8.49	8.63	7.7	7.88	0.140515	0.18141	-0.0409
YDL107W	MSS2	6.94	7.47	7.2	7.21	0.530961	0.03278	0.49818
YDL108W	KIN28	7.76	7.69	8.4	8.33	-0.061905	-0.09404	0.03213
YDL109C		4.49	5.22	7.9	8.19	0.724555	0.2935	0.43105
YDL110C	TMA17	8.97	9.84	7.9	8.52	0.870688	0.63354	0.23714
YDL111C	RRP42	8.81	8.62	9	8.94	-0.195469	-0.01393	-0.18154
YDL112W	TRM3	10.31	9.89	9.7	9.67	-0.412981	-0.00832	-0.40466
YDL113C	ATG20	7.92	8.96	8.3	8.79	1.03772	0.51999	0.51773
YDL114W		2.38	4.37	5.2	5.58	1.99534	0.33378	1.66156
YDL115C	IWR1	7.2	7.55	8.3	8.83	0.353193	0.5339	-0.18071
YDL116W	NUP84	9.54	9.1	9.8	9.52	-0.436727	-0.2923	-0.14443
YDL117W	CYK3	8.69	8.57	9.4	9.31	-0.124694	-0.11097	-0.01372
YDL119C		7.32	7.77	7.7	7.52	0.445547	-0.17665	0.62219
YDL120W	YFH1	8.91	9.22	7.9	8.1	0.306357	0.24445	0.06191
YDL121C		9.17	9.11	8.2	7.6	-0.054348	-0.63047	0.57612
YDL122W	UBP1	10	9.2	9.8	9.98	-0.799402	0.17259	-0.97199
YDL123W	SNA4	7.84	8.84	7.2	7.78	1.00749	0.57586	0.43163
YDL124W		11.66	11.5	10.3	10.12	-0.165602	-0.1536	-0.012
YDL125C	HNT1	10.7	10.32	10	9.62	-0.377754	-0.34851	-0.02924
YDL126C	CDC48	13.29	13.88	11.6	11.92	0.585257	0.31833	0.26692
YDL127W	PCL2	8.16	7.36	8.2	7.3	-0.799804	-0.8742	0.0744
YDL128W	VCX1	10.23	9.91	9.1	9.02	-0.319645	-0.03097	-0.28868
YDL129W		5.65	6.45	6.9	7.58	0.80612	0.65429	0.15183
YDL130W	RPP1B	13.54	13.46	11.5	11.19	-0.072766	-0.35763	0.28486
YDL130W-A	STF1	8.57	9.26	6.7	6.71	0.694748	0.00593	0.68882
YDL131W	LYS21	11.53	11.76	11	11.33	0.239389	0.35288	-0.11349
YDL132W	CDC53	9.84	10.14	9.7	10.19	0.299371	0.46497	-0.1656
YDL133C-A	RPL41B	11.76	12.41	10.5	10.3	0.644773	-0.15214	0.79691
YDL133W		7.13	7.23	9	8.71	0.097103	-0.24589	0.34299
YDL134C	PPH21	9.53	9.02	10.1	10.25	-0.511292	0.11964	-0.63093
YDL135C	RDI1	9.39	9.09	8.5	7.95	-0.29656	-0.49988	0.20332
YDL136W	RPL35B	13.67	13.52	12.6	11.96	-0.1492	-0.63577	0.48657
YDL137W	ARF2	11.12	10.69	9.8	9.47	-0.43721	-0.36624	-0.07097
YDL138W	RGT2	5.9	7.19	8.5	9.2	1.28717	0.73169	0.55548
YDL139C	SCM3	6.2	6.48	7	6.79	0.283038	-0.23448	0.51751
YDL140C	RPO21	11.99	10.65	9.7	10.32	-1.33248	0.60486	-1.93734
YDL141W	BPL1	8.99	8.52	8.4	8.43	-0.469475	0.0034	-0.47288
YDL142C	CRD1	7.67	7.68	8.2	7.84	0.007262	-0.34828	0.35554
YDL143W	CCT4	11.04	10.88	10.7	10.5	-0.1659	-0.22522	0.05932
YDL144C		8.92	9.09	8.9	8.91	0.1678	-0.00293	0.17073
YDL145C	COP1	12.08	11.9	10.7	10.62	-0.182975	-0.03861	-0.14437
YDL146W	LDB17	7.45	7.16	7.9	7.69	-0.291905	-0.16934	-0.12256
YDL147W	RPN5	10.41	11.09	9.5	10.42	0.679871	0.9084	-0.22853
YDL148C	NOP14	9.52	9.33	9	9.54	-0.185344	0.51446	-0.6998
YDL149W	ATG9	7.33	8.5	7.2	7.88	1.17465	0.6317	0.54295
YDL150W	RPC53	8.68	8.35	9.4	9.21	-0.32727	-0.18902	-0.13825
YDL153C	SAS10	9.29	9.13	9.1	9.22	-0.162686	0.12751	-0.2902
YDL154W	MSH5	3.11	4.98	7.3	7.22	1.86342	-0.045	1.90842
YDL155W	CLB3	8.29	7.27	9.2	8.75	-1.01941	-0.50089	-0.51852
YDL156W		7.01	7	7.1	7.17	-0.006363	0.04502	-0.05138
YDL157C		9.33	9.51	8.4	7.54	0.1799	-0.87923	1.05913
YDL159W	STE7	7.61	8.07	7.6	8.05	0.463807	0.41189	0.05191
YDL160C	DHH1	11.33	11.28	9.1	9.04	-0.051071	-0.04545	-0.00562
YDL160C-A		6.77	6.79	6.4	6.07	0.026853	-0.30287	0.32973
YDL161W	ENT1	9.02	9.38	8.5	8.62	0.357299	0.15813	0.19917
YDL164C	CDC9	8.92	7.78	9	8.66	-1.13656	-0.36157	-0.77499
YDL165W	CDC36	8.57	8.11	8.2	7.91	-0.463077	-0.27377	-0.18931
YDL166C	FAP7	8.93	8.36	8.6	8.48	-0.566995	-0.14512	-0.42187
YDL167C	NRP1	8.71	9.12	9.6	9.36	0.404601	-0.22228	0.62689
YDL168W	SFA1	10.72	10.51	9.6	9.78	-0.212721	0.17802	-0.39074
YDL169C	UGX2	5.9	6.96	5.5	6.1	1.06283	0.64425	0.41858
YDL170W	UGA3	7.58	8.5	8.6	9.22	0.917571	0.66838	0.24919
YDL171C	GLT1	12.4	11.26	10.1	10.49	-1.13945	0.36149	-1.50093
YDL173W	PAR32	8.85	9.69	8.6	8.98	0.842947	0.395	0.44795
YDL174C	DLD1	9.51	9.92	9.2	9.93	0.408085	0.7752	-0.36711
YDL175C	AIR2	7.96	7.92	8.1	8.39	-0.042967	0.2445	-0.28747
YDL176W		7.3	7.8	8.7	8.99	0.501854	0.33257	0.16928
YDL177C		6.33	6.78	7.8	8.04	0.449914	0.27735	0.17256
YDL178W	DLD2	9.63	9.65	9.2	9.14	0.024763	-0.08303	0.10779
YDL179W	PCL9	8.2	7.4	9.1	8.19	-0.795639	-0.92522	0.12958
YDL180W		8.15	8.04	8.9	8.76	-0.108063	-0.09546	-0.0126
YDL181W	INH1	9.34	9.48	7.1	6.86	0.141367	-0.28395	0.42531
YDL182W	LYS20	11.03	11.88	10.9	11.84	0.841235	0.9089	-0.06767
YDL183C		6.3	6.92	7.4	7.62	0.619126	0.2192	0.39993
YDL184C	RPL41A	11.76	12.41	10.4	10.13	0.644774	-0.2895	0.93427
YDL185W	VMA1	14.34	14.17	12.1	11.91	-0.165312	-0.2361	0.07079
YDL188C	PPH22	9.55	9.24	9.3	9.39	-0.306664	0.05075	-0.35742
YDL189W	RBS1	8.23	8.62	8.6	8.71	0.393965	0.08239	0.31157
YDL190C	UFD2	9.96	9.63	9.7	9.93	-0.330978	0.19366	-0.52463
YDL191W	RPL35A	13.71	13.57	12.7	12.06	-0.144371	-0.6241	0.47973
YDL192W	ARF1	12.42	11.92	11.2	10.27	-0.496164	-0.93379	0.43763
YDL193W	NUS1	9.3	9.22	9.1	9.02	-0.084285	-0.03438	-0.0499
YDL194W	SNF3	6.04	6.23	7.1	7.55	0.195838	0.40907	-0.21323
YDL195W	SEC31	12.03	11.56	9.8	9.86	-0.465191	0.10896	-0.57415
YDL197C	ASF2	5.22	5.31	8.5	8.87	0.092321	0.34275	-0.25043
YDL198C	GGC1	8.93	9.36	7.7	7.75	0.428868	0.00377	0.4251
YDL199C		7.23	7.94	6.6	7.25	0.703649	0.63778	0.06587
YDL200C	MGT1	7.55	8.16	7.5	7.63	0.612624	0.09287	0.51976
YDL201W	TRM8	9.14	8.29	8.7	8.28	-0.848561	-0.40074	-0.44782
YDL202W	MRPL11	8.38	7.66	7.7	7.25	-0.715761	-0.43814	-0.27762
YDL203C	ACK1	7.75	7.75	8.8	8.74	0.004404	-0.082	0.0864
YDL204W	RTN2	7.53	8.05	7.3	6.99	0.520204	-0.27305	0.79325
YDL205C	HEM3	8.92	7.77	8.8	8.94	-1.15336	0.10223	-1.25559
YDL206W		6.42	5.79	7.7	8.14	-0.628587	0.39595	-1.02454
YDL207W	GLE1	7.77	8.25	8.8	8.86	0.474985	0.08962	0.38536
YDL208W	NHP2	9.93	9.62	10.3	9.48	-0.31179	-0.84222	0.53043
YDL209C	CWC2	7.17	7.72	7.7	8.11	0.557588	0.3931	0.16449
YDL210W	UGA4	5.04	6.43	5.6	6.49	1.38652	0.85106	0.53545
YDL211C		6.28	5.79	6	5.54	-0.491032	-0.43123	-0.0598
YDL212W	SHR3	10.3	10.19	9.4	8.75	-0.108187	-0.62523	0.51704
YDL213C	NOP6	8.8	8.45	8.6	8.21	-0.343808	-0.40712	0.06331
YDL214C	PRR2	3.49	5.05	5.6	5.95	1.55657	0.34488	1.21168
YDL215C	GDH2	9.22	10.33	9.9	10.43	1.10863	0.49411	0.61452
YDL216C	RRI1	7.16	7.03	7.3	7.45	-0.130777	0.13475	-0.26552
YDL217C	TIM22	8.23	8.58	8.1	8.2	0.352164	0.07756	0.27461
YDL218W		1.79	0.73	5.6	6.21	-1.06382	0.64423	-1.70806
YDL219W	DTD1	8.88	8.39	8	7.35	-0.486857	-0.61595	0.12909
YDL220C	CDC13	7.09	7.25	8	8.13	0.16057	0.10769	0.05288
YDL222C	FMP45	7.6	7.91	7.3	7.58	0.307486	0.25684	0.05064
YDL223C	HBT1	8.49	9.06	7.5	7.96	0.570936	0.43739	0.13355
YDL224C	WHI4	9.18	8.49	8.9	9.08	-0.696121	0.14762	-0.84374
YDL225W	SHS1	9.53	9.09	8.9	8.63	-0.443191	-0.25561	-0.18758
YDL226C	GCS1	9.99	9.07	9.6	8.79	-0.912564	-0.77885	-0.13371
YDL227C	HO	9.32	3.31	9.4	5.63	-6.01097	-3.73564	-2.27533
YDL229W	SSB1	15.52	14.59	13.9	13.57	-0.9302	-0.36626	-0.56394
YDL230W	PTP1	7.82	7.5	8.2	7.99	-0.318534	-0.21851	-0.10003
YDL231C	BRE4	5.11	6.38	9.4	9.71	1.27251	0.31919	0.95332
YDL232W	OST4	8.21	9.12	6.3	6.2	0.908487	-0.11579	1.02428
YDL233W		7.87	8.13	8	8.1	0.26631	0.05604	0.21027
YDL234C	GYP7	9	9.49	9	9.55	0.487905	0.5404	-0.0525
YDL235C	YPD1	8.98	8.81	8.4	8.54	-0.161534	0.18241	-0.34395
YDL236W	PHO13	9.96	9.15	9.5	9.25	-0.811324	-0.24	-0.57132
YDL237W	AIM6	9.82	10.45	8.6	8.84	0.625305	0.23708	0.38822
YDL238C	GUD1	6.41	8.25	6.7	7.7	1.84529	1.01236	0.83292
YDL239C	ADY3	1.38	5.4	6.9	7.61	4.02319	0.72686	3.29633
YDL240W	LRG1	7.6	6.31	7.5	7.21	-1.28295	-0.30466	-0.97829
YDL243C	AAD4	3.88	4.37	8	8.27	0.490981	0.27051	0.22047
YDL244W	THI13	6.4	8.86	6.9	7.93	2.45679	1.06812	1.38867
YDL246C	SOR2	6.17	6.9	6.6	6.87	0.729778	0.27145	0.45833
YDL247W	MPH2	2.79	4.05	5	6.2	1.25929	1.18545	0.07384
YDL248W	COS7	9.99	10.58	9.1	9.45	0.593075	0.34786	0.24522
YDR001C	NTH1	11.01	12.09	10.4	11.19	1.0872	0.80322	0.28398
YDR002W	YRB1	11.52	11.17	10.9	10.03	-0.350818	-0.83875	0.48793
YDR004W	RAD57	6.6	7.8	8.9	8.86	1.206	0.00124	1.20477
YDR005C	MAF1	7.72	7.8	8.8	8.69	0.082264	-0.07841	0.16067
YDR006C	SOK1	8.75	8.91	9.2	9.83	0.157488	0.62574	-0.46826
YDR007W	TRP1	7.43	7.87	8.3	8.77	0.440789	0.44888	-0.00809
YDR009W	GAL3	5.96	6.53	6.9	8.01	0.574924	1.06754	-0.49262
YDR011W	SNQ2	10.57	9.6	10.2	11.03	-0.969154	0.79101	-1.76017
YDR012W	RPL4B	14.93	14.35	13.9	13.31	-0.578437	-0.59403	0.01559
YDR013W	PSF1	7.71	7.51	8	7.69	-0.198772	-0.28581	0.08704
YDR014W	RAD61	6.78	7.48	6.8	7.45	0.703774	0.60569	0.09808
YDR014W-A	HED1	5.18	6.97	5.2	5.52	1.78421	0.30039	1.48382
YDR016C	DAD1	7.41	7.19	7.6	7.09	-0.224688	-0.50827	0.28358
YDR017C	KCS1	8.94	8.55	9.3	9.3	-0.38536	-0.04614	-0.33922
YDR018C		5.92	6.84	5.8	6.66	0.921004	0.81606	0.10494
YDR019C	GCV1	10.35	9.71	9.9	9.08	-0.644033	-0.83255	0.18852
YDR020C	DAS2	7.19	7.3	7.7	7.33	0.104399	-0.32965	0.43405
YDR021W	FAL1	7.41	7.13	8.3	8.31	-0.279628	0.0451	-0.32473
YDR022C	CIS1	6.87	7.59	7.8	7.64	0.724775	-0.11077	0.83554
YDR023W	SES1	12.2	11.18	11	10.42	-1.01861	-0.62777	-0.39084
YDR025W	RPS11A	13.23	12.83	12.1	11.86	-0.406386	-0.2742	-0.13218
YDR026C		6.96	7.32	8.7	8.99	0.360387	0.32102	0.03937
YDR027C	VPS54	8.17	8.36	8.6	8.85	0.189933	0.23296	-0.04303
YDR028C	REG1	9.67	7.71	9.8	10.44	-1.95831	0.64971	-2.60802
YDR030C	RAD28	6.6	7.82	7.6	8.4	1.22293	0.78115	0.44178
YDR031W	MIC14	7.6	7.67	7	6.51	0.072565	-0.48311	0.55568
YDR032C	PST2	12.03	12.26	10.6	10.39	0.220789	-0.22038	0.44117
YDR033W	MRH1	13.76	13.03	12.5	11.63	-0.725111	-0.85539	0.13028
YDR034C	LYS14	8.25	8.22	9.5	9.9	-0.034948	0.37683	-0.41178
YDR034W-B		6.09	7.69	5.4	6.34	1.59217	0.96717	0.62501
YDR035W	ARO3	10.44	10.94	9.6	9.9	0.498937	0.28462	0.21431
YDR036C	EHD3	8.89	8.56	8.7	8.35	-0.327127	-0.31595	-0.01118
YDR037W	KRS1	12.5	12.34	11.6	11.58	-0.156436	-0.01232	-0.14412
YDR038C	ENA5	11.06	11.33	11	11.15	0.264621	0.18621	0.07841
YDR039C	ENA2	11.13	11.38	11.1	11.25	0.251807	0.15663	0.09518
YDR040C	ENA1	10.95	11.13	11	11.19	0.176085	0.14412	0.03196
YDR041W	RSM10	8.47	7.89	8.3	8.17	-0.573071	-0.12169	-0.45138
YDR042C		5.25	4.37	6	4.62	-0.884492	-1.40825	0.52376
YDR043C	NRG1	8.94	9.63	9.4	9.65	0.694115	0.2023	0.49181
YDR044W	HEM13	9.38	8.72	8.6	7.99	-0.660098	-0.61621	-0.04389
YDR045C	RPC11	8.53	8.38	7.9	7.77	-0.146702	-0.16989	0.02319
YDR046C	BAP3	10.08	10.02	10.6	10.79	-0.059169	0.17921	-0.23838
YDR047W	HEM12	8.59	7.95	10.1	9.83	-0.642966	-0.26897	-0.374
YDR049W	VMS1	8.39	8.31	8.8	8.82	-0.080624	0.04164	-0.12226
YDR050C	TPI1	15.24	14.85	13.8	12.88	-0.393753	-0.931	0.53725
YDR051C	DET1	8.72	8.56	8.7	8.81	-0.167029	0.12953	-0.29656
YDR052C	DBF4	8.31	8.14	8.9	8.73	-0.170392	-0.19518	0.02479
YDR054C	CDC34	9.55	9.29	9	8.82	-0.25569	-0.15924	-0.09645
YDR055W	PST1	11.43	11.61	11.2	11.3	0.180901	0.10494	0.07597
YDR056C		8.91	9.26	8.3	7.71	0.340342	-0.61035	0.95069
YDR057W	YOS9	8.7	8.98	8.1	8.5	0.286849	0.36182	-0.07497
YDR058C	TGL2	6.83	7.72	7.4	7.94	0.88639	0.54995	0.33644
YDR059C	UBC5	7.34	7.99	6.3	6.49	0.655545	0.22444	0.43111
YDR060W	MAK21	10.41	9.67	10.2	10.16	-0.740151	-0.06434	-0.67581
YDR061W		8.77	8.44	9.1	9.01	-0.326471	-0.13439	-0.19208
YDR062W	LCB2	10.57	9.19	10.2	10.21	-1.38354	0.02274	-1.40628
YDR063W	AIM7	8.46	7.63	7.5	7.23	-0.826844	-0.2933	-0.53354
YDR064W	RPS13	13.95	13.6	12.5	12.22	-0.34419	-0.30552	-0.03868
YDR065W	RRG1	6.54	7.06	7.7	7.66	0.512385	-0.06239	0.57478
YDR066C	RTR2	6.96	6.84	7	6.53	-0.123594	-0.49807	0.37448
YDR067C	OCA6	7.03	7.3	8	7.76	0.268636	-0.20939	0.47802
YDR068W	DOS2	8.08	7.99	7.3	7.7	-0.083952	0.38019	-0.46414
YDR069C	DOA4	8.16	8.41	8	8.18	0.247966	0.14118	0.10679
YDR070C	FMP16	6.65	7.32	4.8	4.7	0.672375	-0.0896	0.76198
YDR071C	PAA1	10.15	10	9.4	9.02	-0.146458	-0.36624	0.21978
YDR072C	IPT1	9.29	9.4	9.8	10.17	0.107626	0.36357	-0.25594
YDR073W	SNF11	7.34	7.82	7.6	6.92	0.471181	-0.64693	1.11811
YDR074W	TPS2	11.68	11.41	10.3	10.08	-0.265255	-0.22731	-0.03795
YDR075W	PPH3	8.11	7.99	8	8.08	-0.11909	0.09685	-0.21594
YDR076W	RAD55	6.17	6.24	7	6.79	0.069832	-0.25512	0.32495
YDR077W	SED1	15.31	15.25	12.2	12.25	-0.059769	0.00869	-0.06846
YDR078C	SHU2	5.04	6.98	6.4	7.33	1.94542	0.92248	1.02294
YDR079C-A	TFB5	7	7.68	6.4	6.82	0.677734	0.37175	0.30599
YDR079W	PET100	7.96	8.46	7	6.67	0.505848	-0.33596	0.84181
YDR080W	VPS41	8.63	8.95	8.7	9.08	0.320238	0.42414	-0.1039
YDR081C	PDC2	9.01	9.39	9	9.14	0.387217	0.14721	0.24001
YDR082W	STN1	5	5.95	8.9	9.14	0.95393	0.27394	0.67999
YDR083W	RRP8	8.26	8.39	8.8	8.8	0.132605	0.00832	0.12429
YDR084C	TVP23	8.54	8.75	7.7	7.88	0.215351	0.22158	-0.00623
YDR085C	AFR1	7.55	7.3	7.6	8.41	-0.250154	0.84527	-1.09543
YDR086C	SSS1	10.16	9.95	8.3	7.76	-0.208629	-0.51849	0.30986
YDR087C	RRP1	9.16	8.3	9	8.63	-0.85967	-0.38053	-0.47914
YDR088C	SLU7	7.36	7.35	7.4	7.95	-0.011254	0.56827	-0.57953
YDR089W		9.08	7.66	9.2	8.68	-1.41642	-0.48682	-0.9296
YDR090C		7.7	7.94	7.4	7.93	0.239648	0.5676	-0.32795
YDR091C	RLI1	11.18	10.51	10.5	10.02	-0.671424	-0.47206	-0.19936
YDR092W	UBC13	9.43	9.57	8.5	8.61	0.143309	0.15373	-0.01042
YDR093W	DNF2	9.66	7.17	9.5	9.36	-2.48739	-0.16683	-2.32057
YDR096W	GIS1	8.15	8.28	7.3	8.01	0.127493	0.69903	-0.57154
YDR097C	MSH6	9.68	9.2	8.9	8.98	-0.481827	0.13079	-0.61261
YDR098C	GRX3	10.47	10.03	9.5	9.05	-0.444109	-0.49525	0.05114
YDR099W	BMH2	11.89	11.88	9.6	9.87	-0.01379	0.31408	-0.32787
YDR100W	TVP15	9.2	9.24	7.8	7.76	0.045637	-0.04083	0.08647
YDR101C	ARX1	10.12	9.47	10.1	10.08	-0.655841	-0.05444	-0.6014
YDR103W	STE5	8.79	9.02	9	9.12	0.229369	0.15679	0.07258
YDR105C	TMS1	9.01	8.96	9	9.28	-0.042562	0.27554	-0.3181
YDR106W	ARP10	4.31	4.85	4.4	4.49	0.538829	0.06811	0.47071
YDR107C	TMN2	8.71	8.63	7.8	7.81	-0.082325	0.01109	-0.09341
YDR108W	GSG1	7.89	7.91	8.7	8.76	0.019451	0.09864	-0.07919
YDR109C		7.43	8.32	8.4	9.11	0.885258	0.73863	0.14663
YDR110W	FOB1	7.57	7.75	8.8	8.88	0.180778	0.1056	0.07518
YDR111C	ALT2	8.39	6.58	9.2	8.73	-1.81307	-0.51493	-1.29814
YDR113C	PDS1	8.02	6.9	8.2	7	-1.12403	-1.23909	0.11506
YDR115W		8.19	8.09	7.5	7.02	-0.101484	-0.43891	0.33742
YDR116C	MRPL1	8.4	8.4	8.2	7.72	-0.001182	-0.46674	0.46556
YDR117C	TMA64	8.53	7.87	8.3	8.07	-0.66086	-0.23436	-0.4265
YDR118W	APC4	7.35	7.51	8.3	8.33	0.167652	0.05213	0.11552
YDR119W	VBA4	10.07	9.1	10.3	10.11	-0.965529	-0.14208	-0.82345
YDR119W-A		6.35	6.37	5	3.92	0.020724	-1.03201	1.05274
YDR120C	TRM1	9.99	9.73	9.9	9.59	-0.254704	-0.29296	0.03826
YDR121W	DPB4	8.2	8.2	8.2	7.58	-0.002075	-0.65061	0.64854
YDR122W	KIN1	9.16	8.8	9.2	9.72	-0.358427	0.52346	-0.88189
YDR123C	INO2	7.48	7.19	8.5	7.97	-0.296394	-0.52436	0.22797
YDR124W		3.25	3.31	6.1	5.67	0.057091	-0.39688	0.45397
YDR125C	ECM18	5.28	6.98	6.5	7.17	1.69531	0.62863	1.06669
YDR126W	SWF1	6.38	7.39	6.5	7.33	1.01496	0.81849	0.19646
YDR127W	ARO1	12.1	12.77	10.6	11.52	0.671395	0.87805	-0.20666
YDR128W	MTC5	8.11	9.02	9.1	9.36	0.909627	0.24433	0.66529
YDR129C	SAC6	11.93	11.62	10.7	10.5	-0.310473	-0.15871	-0.15176
YDR130C	FIN1	7.77	7.36	8.2	7.43	-0.411744	-0.74822	0.33647
YDR131C		7.14	8.13	8.1	8.34	0.991126	0.28432	0.70681
YDR132C		5.9	6.85	7.5	7.61	0.955097	0.08448	0.87061
YDR135C	YCF1	10.92	10.68	10	10.6	-0.238988	0.59251	-0.8315
YDR137W	RGP1	8.06	8.25	8.8	8.86	0.196313	0.06251	0.13381
YDR138W	HPR1	8.75	9.13	8.8	9.02	0.376089	0.26338	0.11271
YDR139C	RUB1	7.82	8.61	6.9	7.04	0.788832	0.16161	0.62722
YDR140W	MTQ2	7.27	7.51	8.2	8.01	0.239606	-0.15011	0.38971
YDR141C	DOP1	10	10.02	9.2	9.49	0.02679	0.3283	-0.30151
YDR142C	PEX7	7.35	7.48	7.2	7.27	0.124456	0.03196	0.0925
YDR143C	SAN1	8.08	6.75	8	8.55	-1.33278	0.55031	-1.8831
YDR144C	MKC7	9.53	7.76	9.6	9.14	-1.76598	-0.43131	-1.33467
YDR145W	TAF12	9.08	9.63	9.1	9.34	0.547686	0.27203	0.27565
YDR146C	SWI5	9.62	8.6	9.3	8.43	-1.02384	-0.82325	-0.20058
YDR147W	EKI1	8.17	7.76	9.3	8.86	-0.41912	-0.45708	0.03796
YDR148C	KGD2	10.36	10.26	8.6	8.62	-0.09801	0.00121	-0.09922
YDR150W	NUM1	12.02	12.44	9.7	10.4	0.423361	0.71305	-0.28969
YDR151C	CTH1	8.74	9.66	8.9	9.22	0.920474	0.29946	0.62101
YDR152W	GIR2	9.08	8.82	8.8	8.75	-0.257653	-0.00877	-0.24888
YDR153C	ENT5	9.43	9.4	9.2	9.08	-0.032224	-0.1292	0.09698
YDR155C	CPR1	14.3	14.44	13.1	12.67	0.137995	-0.46768	0.60568
YDR156W	RPA14	9.29	9.41	8.2	8.03	0.11788	-0.16147	0.27935
YDR158W	HOM2	12.27	12.49	11.1	10.71	0.218534	-0.36646	0.58499
YDR159W	SAC3	7.82	7.82	8.4	8.67	-0.005048	0.27041	-0.27546
YDR160W	SSY1	6.22	7.1	8.3	8.62	0.884829	0.35498	0.52985
YDR161W		9.2	8.77	9.5	9.11	-0.42576	-0.42624	0.00048
YDR162C	NBP2	7.9	7.96	7.9	7.88	0.054913	-0.02852	0.08344
YDR163W	CWC15	7.53	7.99	7	6.95	0.461089	-0.07079	0.53188
YDR164C	SEC1	8.48	8.63	8.7	8.93	0.152203	0.2071	-0.0549
YDR165W	TRM82	9.7	8.7	10	9.47	-0.997269	-0.49738	-0.49988
YDR166C	SEC5	9.04	9.73	8.7	9.34	0.689687	0.68609	0.00359
YDR167W	TAF10	8.16	7.54	8.4	8.22	-0.619853	-0.21316	-0.40669
YDR168W	CDC37	10.27	10.19	9	9.22	-0.083371	0.19549	-0.27886
YDR169C	STB3	7.68	7.7	7.9	8.2	0.011333	0.26458	-0.25325
YDR170C	SEC7	11.49	8.95	10	10.23	-2.54021	0.18543	-2.72564
YDR170W-A		10.84	11.09	8.5	9.15	0.253675	0.64383	-0.39015
YDR171W	HSP42	10.45	12.01	8.7	9.94	1.56523	1.20673	0.3585
YDR172W	SUP35	12.08	11.12	10.8	10.66	-0.957634	-0.1492	-0.80844
YDR173C	ARG82	8.01	8.69	7.8	8.3	0.677539	0.46991	0.20763
YDR174W	HMO1	10.39	10.09	10.8	10.54	-0.303226	-0.27135	-0.03188
YDR175C	RSM24	8.43	8.26	8.4	8.03	-0.167928	-0.37873	0.2108
YDR176W	NGG1	7.83	8.41	8.7	8.89	0.574797	0.16622	0.40858
YDR177W	UBC1	9.98	9.7	9.4	9.2	-0.282986	-0.1866	-0.09639
YDR178W	SDH4	9.29	9.71	8	8.76	0.424692	0.74013	-0.31544
YDR179C	CSN9	7.21	6.37	6.6	6.15	-0.840428	-0.46667	-0.37375
YDR179W-A		6.86	7.11	8.4	8.2	0.254211	-0.2261	0.48031
YDR180W	SCC2	8.23	7.25	8.1	8.32	-0.976355	0.2311	-1.20745
YDR181C	SAS4	7.53	7.59	8.3	8.03	0.053351	-0.29745	0.3508
YDR182W	CDC1	9.44	9.35	8.5	8.2	-0.081749	-0.33411	0.25236
YDR183W	PLP1	7.17	7.44	7.4	7.67	0.267899	0.23805	0.02985
YDR184C	ATC1	7.44	8.21	8	8.05	0.770733	0.0849	0.68583
YDR185C	UPS3	6.15	6.77	5.3	5.88	0.623296	0.59073	0.03257
YDR186C		8.84	9.16	9.9	10.57	0.320794	0.70178	-0.38098
YDR188W	CCT6	11.48	11.26	10.8	11.04	-0.212071	0.2248	-0.43687
YDR189W	SLY1	9.92	9.04	9.5	8.96	-0.877232	-0.55423	-0.323
YDR190C	RVB1	10.56	10.12	10.4	10.14	-0.432138	-0.27515	-0.15699
YDR191W	HST4	7.51	7.38	8	7.87	-0.134514	-0.12294	-0.01158
YDR192C	NUP42	8.43	8.38	8.2	8.18	-0.052515	-0.03602	-0.0165
YDR194C	MSS116	9.27	9.44	8.8	8.79	0.16671	-0.02245	0.18916
YDR195W	REF2	8.02	8.4	8.6	8.87	0.371285	0.26877	0.10252
YDR196C	CAB5	8.06	8.31	8.1	7.99	0.246349	-0.11807	0.36442
YDR197W	CBS2	7.62	7.67	8.5	8.06	0.051256	-0.45934	0.5106
YDR198C	RKM2	7.23	7.62	8.5	8.54	0.387109	-0.007	0.39411
YDR200C	VPS64	7.34	7.78	7.7	7.99	0.440441	0.24405	0.19639
YDR201W	SPC19	7.35	7.2	7.1	6.53	-0.145115	-0.52041	0.3753
YDR202C	RAV2	7.54	8.22	8.2	8.37	0.678259	0.18713	0.49113
YDR204W	COQ4	8.91	9.75	8.8	8.98	0.839192	0.22101	0.61818
YDR205W	MSC2	8.56	8.93	8.4	8.46	0.370692	0.06229	0.30841
YDR206W	EBS1	8	7.39	10.2	10.31	-0.617373	0.11834	-0.73571
YDR207C	UME6	7.86	7.81	8.6	8.86	-0.048472	0.24316	-0.29164
YDR208W	MSS4	9.07	8.61	9.6	9.87	-0.461124	0.30086	-0.76198
YDR210W		9.62	9.33	8	7.41	-0.285613	-0.53619	0.25058
YDR211W	GCD6	10.35	10.03	10.3	10.24	-0.322815	-0.05815	-0.26467
YDR212W	TCP1	11.36	11.21	10.2	10.15	-0.141896	-0.02853	-0.11337
YDR213W	UPC2	8.16	7.76	9.2	9.11	-0.406036	-0.09201	-0.31402
YDR214W	AHA1	11.82	12.36	10.9	11.04	0.53984	0.17368	0.36616
YDR216W	ADR1	9.66	10.63	8.4	10.01	0.963391	1.63814	-0.67475
YDR217C	RAD9	8.35	8.23	8.2	9.28	-0.115065	1.07383	-1.18889
YDR218C	SPR28	5.94	8.3	5.5	5.8	2.36053	0.29634	2.0642
YDR219C	MFB1	8.4	8.01	8.7	8.3	-0.387615	-0.3729	-0.01471
YDR221W	GTB1	9.38	10.12	8.6	8.8	0.740754	0.22112	0.51964
YDR222W		8.77	8.11	8.4	7.57	-0.666378	-0.85122	0.18484
YDR223W	CRF1	3.7	5.01	6.7	7.22	1.31551	0.47813	0.83738
YDR224C	HTB1	11.74	10.37	11.1	9.14	-1.37231	-1.94942	0.57711
YDR225W	HTA1	12.46	10.73	12.5	10.11	-1.73493	-2.42846	0.69353
YDR226W	ADK1	12.58	11.86	11.1	9.95	-0.726945	-1.12546	0.39851
YDR227W	SIR4	7.94	8.48	8.8	9.02	0.541996	0.1937	0.34829
YDR228C	PCF11	8.69	8.45	9	8.97	-0.233982	0.0025	-0.23648
YDR229W	IVY1	8.24	8.57	9	8.8	0.333178	-0.18003	0.51321
YDR231C	COX20	8.03	8.14	8.2	8.39	0.110087	0.21702	-0.10693
YDR232W	HEM1	10.3	9.57	10	10.22	-0.727851	0.23803	-0.96588
YDR233C	RTN1	11.99	11.94	10.9	10.51	-0.048717	-0.38507	0.33635
YDR234W	LYS4	10.03	10.07	9.9	10.25	0.044791	0.34095	-0.29616
YDR235W	PRP42	7.65	7.76	8.5	8.7	0.110063	0.22114	-0.11108
YDR236C	FMN1	8.13	8.84	8.3	8.5	0.712643	0.1792	0.53344
YDR237W	MRPL7	8.21	7.54	7.7	7.34	-0.66797	-0.36597	-0.302
YDR238C	SEC26	11.61	10.82	10.6	10.31	-0.792417	-0.32325	-0.46917
YDR239C		7.89	8.11	8.7	8.73	0.225102	-0.00728	0.23238
YDR240C	SNU56	7.44	7.37	8.5	8.69	-0.07323	0.16262	-0.23585
YDR242W	AMD2	4.43	6.09	8.1	8.6	1.6528	0.51641	1.13638
YDR243C	PRP28	7.89	7.83	8	8.06	-0.060087	0.04668	-0.10676
YDR244W	PEX5	8.57	8.59	9	8.97	0.015492	0.01285	0.00264
YDR245W	MNN10	9.63	9.22	9.8	9.3	-0.41296	-0.4716	0.05864
YDR246W	TRS23	8.14	8.27	7.3	7.44	0.12647	0.14436	-0.01789
YDR247W	VHS1	6.68	7.7	6.1	6.75	1.01649	0.69092	0.32556
YDR248C		7.71	8.64	7.5	7.6	0.928098	0.12968	0.79842
YDR249C		5.57	6.49	8.1	7.67	0.921367	-0.39336	1.31473
YDR251W	PAM1	9.25	8.07	9.2	9.52	-1.17664	0.35823	-1.53487
YDR252W	BTT1	6.11	5.43	6.6	5.54	-0.683844	-1.08268	0.39884
YDR254W	CHL4	6.27	6.78	7.3	7.67	0.513678	0.34128	0.1724
YDR255C	RMD5	7.01	8.14	6.3	6.86	1.12758	0.59463	0.53294
YDR256C	CTA1	2.11	3.63	4.8	5.23	1.5157	0.47666	1.03904
YDR257C	RKM4	8.34	8.54	8.9	9.01	0.198803	0.1214	0.07741
YDR258C	HSP78	11.34	12.73	10	11.19	1.39952	1.17326	0.22627
YDR259C	YAP6	4.55	5.53	5.8	6.54	0.984239	0.73184	0.2524
YDR260C	SWM1	7.43	7.78	7.1	7.28	0.354587	0.20911	0.14547
YDR261C	EXG2	10	9.64	9.3	8.89	-0.36348	-0.42116	0.05768
YDR262W		9.06	9.98	8.8	9.27	0.92361	0.48343	0.44018
YDR263C	DIN7	6.22	5.7	7	5.97	-0.516218	-1.05198	0.53576
YDR264C	AKR1	9.66	9.21	10.4	10.72	-0.45275	0.36385	-0.8166
YDR265W	PEX10	6.48	6.33	8.7	8.77	-0.151458	0.06231	-0.21377
YDR266C		8.91	7.16	9.2	9.2	-1.75056	-0.0321	-1.71846
YDR267C	CIA1	7.81	7.45	8.3	8.23	-0.360529	-0.1226	-0.23793
YDR268W	MSW1	7.93	7.65	8.3	8.08	-0.281608	-0.21483	-0.06678
YDR270W	CCC2	7.3	7.81	7.1	7.53	0.513266	0.43692	0.07635
YDR272W	GLO2	9.92	9.92	9.3	9.12	-0.000151	-0.19708	0.19693
YDR273W	DON1	5.18	2.73	7	6.33	-2.45718	-0.62723	-1.82995
YDR275W	BSC2	5.62	7.6	8.5	8.67	1.98155	0.19304	1.7885
YDR276C	PMP3	10.56	10.67	8.4	8.27	0.105068	-0.09203	0.19709
YDR277C	MTH1	7.02	8.13	6.1	7	1.10659	0.94559	0.161
YDR279W	RNH202	7.62	7.04	7.9	7.77	-0.578165	-0.09252	-0.48564
YDR280W	RRP45	8.31	8	9.2	8.79	-0.308165	-0.36221	0.05405
YDR282C		7.17	7.19	7.7	7.83	0.020141	0.15227	-0.13212
YDR283C	GCN2	9.17	9.23	9.1	9.14	0.064075	0.06593	-0.00186
YDR284C	DPP1	9.2	7.58	8.7	8.75	-1.62328	0.04655	-1.66983
YDR285W	ZIP1	6.3	7.28	6.9	7.43	0.982592	0.51385	0.46874
YDR286C		6.7	7.22	6.6	6.49	0.519437	-0.05686	0.57629
YDR287W	INM2	7.65	8.13	7.7	7.72	0.47956	0.0474	0.43216
YDR288W	NSE3	6.84	7.37	8.3	8.55	0.539098	0.29538	0.24372
YDR289C	RTT103	8.21	8.23	7.6	8	0.015416	0.44488	-0.42946
YDR291W	HRQ1	7.71	8.28	9	9.33	0.573083	0.30075	0.27233
YDR292C	SRP101	9.29	7.96	9.4	9.44	-1.32896	0.01838	-1.34734
YDR293C	SSD1	10.82	8.86	9.9	10.54	-1.96251	0.63423	-2.59674
YDR294C	DPL1	10.21	10.5	10	10.05	0.297525	0.0803	0.21722
YDR295C	HDA2	8.41	8.7	9.1	9.13	0.291813	0.04168	0.25013
YDR296W	MHR1	8.43	7.89	8.2	7.95	-0.542073	-0.23852	-0.30356
YDR297W	SUR2	10.48	9.36	9.7	9.2	-1.11569	-0.49631	-0.61938
YDR298C	ATP5	10.25	9.72	9.4	8.96	-0.535155	-0.40655	-0.12861
YDR299W	BFR2	9.14	9.03	9.2	9.34	-0.117886	0.1756	-0.29348
YDR300C	PRO1	9.57	9.35	9.3	9.33	-0.222052	0.03349	-0.25554
YDR301W	CFT1	8.65	8.84	8.4	8.47	0.184216	0.04682	0.1374
YDR302W	GPI11	8.17	7.63	7.9	7.57	-0.537354	-0.31227	-0.22509
YDR303C	RSC3	9.23	9.18	9.4	9.72	-0.048991	0.30743	-0.35642
YDR304C	CPR5	11.26	11.55	10.1	9.58	0.294131	-0.50578	0.79991
YDR305C	HNT2	7.77	7.62	7.5	7.01	-0.14334	-0.50013	0.35679
YDR306C		7.65	8.11	9	8.98	0.460912	0.01239	0.44852
YDR307W		9.3	9.19	8.5	8.66	-0.115322	0.15048	-0.2658
YDR308C	SRB7	7.96	7.66	7.1	6.63	-0.294081	-0.42583	0.13175
YDR309C	GIC2	9.94	9.1	9.9	9.04	-0.844582	-0.87745	0.03286
YDR310C	SUM1	9.08	8.14	9.5	9.5	-0.940253	0.0239	-0.96415
YDR311W	TFB1	8.27	7.58	9.1	9.05	-0.693934	-0.0257	-0.66823
YDR312W	SSF2	8.55	8.27	8.7	8.53	-0.280053	-0.1499	-0.13016
YDR313C	PIB1	6.48	7.98	6.8	7.13	1.50301	0.38195	1.12107
YDR315C	IPK1	5.94	7.19	6.8	7.5	1.25141	0.65234	0.59907
YDR316W	OMS1	7.38	7.74	7.3	7.5	0.363825	0.24855	0.11527
YDR317W	HIM1	6.91	6.4	7.6	7.04	-0.510883	-0.58486	0.07398
YDR318W	MCM21	6.39	6.25	7.8	7.44	-0.138868	-0.30933	0.17046
YDR319C		7.02	7.35	7.6	7.46	0.328201	-0.10176	0.42996
YDR320C	SWA2	8.82	8.87	8.3	8.38	0.046955	0.07489	-0.02794
YDR320C-A	DAD4	7.44	7.49	7.3	6.68	0.048174	-0.6021	0.65028
YDR321W	ASP1	11.01	10.08	10.4	9.84	-0.922727	-0.55857	-0.36416
YDR322C-A	TIM11	9.05	8.91	7.6	7.01	-0.134146	-0.54596	0.41182
YDR322W	MRPL35	8.42	7.71	8.3	8.09	-0.715372	-0.18724	-0.52813
YDR323C	PEP7	6.5	7.18	8.2	8.4	0.670598	0.16374	0.50686
YDR324C	UTP4	9.88	9.63	10	9.85	-0.246968	-0.14248	-0.10449
YDR325W	YCG1	8.29	7.7	8.8	8.99	-0.593051	0.15601	-0.74906
YDR326C	YSP2	8.99	7.55	9.1	9.8	-1.43775	0.71045	-2.14819
YDR328C	SKP1	10.11	10.22	9.7	9.48	0.117812	-0.17758	0.29539
YDR329C	PEX3	8.43	9.1	9.1	9.27	0.673489	0.17652	0.49697
YDR330W	UBX5	8.39	8.67	8.1	8.49	0.27408	0.3899	-0.11582
YDR331W	GPI8	8.93	8.92	8.7	8.42	-0.01	-0.23317	0.22317
YDR332W	IRC3	5.81	6.69	8.5	8.4	0.880941	-0.12474	1.00568
YDR333C		9.06	9.11	9.7	9.83	0.04097	0.09554	-0.05458
YDR334W	SWR1	7.49	7.72	8.5	8.33	0.227106	-0.13739	0.36449
YDR335W	MSN5	10.08	8.42	10	10.35	-1.66382	0.36797	-2.03178
YDR336W		6.78	6.73	8.2	7.92	-0.05266	-0.26163	0.20897
YDR337W	MRPS28	8.24	8.04	8.3	7.87	-0.201701	-0.41014	0.20844
YDR338C		7.5	7.87	8.8	8.92	0.366669	0.14325	0.22342
YDR339C	FCF1	8.91	8.68	8.6	8.39	-0.227038	-0.24186	0.01482
YDR341C		12.11	11.66	10.7	10.16	-0.450451	-0.56623	0.11578
YDR342C	HXT7	12.9	11.3	10.5	9.31	-1.59803	-1.20005	-0.39798
YDR343C	HXT6	12.85	11.29	10.4	9.28	-1.56721	-1.11839	-0.44883
YDR345C	HXT3	12.37	13.01	10.3	11.08	0.642121	0.79157	-0.14945
YDR346C	SVF1	10.51	10.03	10.1	9.74	-0.481527	-0.33324	-0.14828
YDR347W	MRP1	8.92	8.67	8.2	8.59	-0.250261	0.38627	-0.63653
YDR348C		8.94	8.28	9.4	9.19	-0.659818	-0.19995	-0.45987
YDR349C	YPS7	8.83	7.96	9.4	10	-0.87112	0.56159	-1.43271
YDR350C	ATP22	6.35	7.42	9	9.18	1.07333	0.18068	0.89264
YDR351W	SBE2	8.65	8.24	9.2	9.42	-0.413991	0.27375	-0.68774
YDR352W		8.75	8.59	8.6	8.53	-0.163917	-0.09485	-0.06907
YDR353W	TRR1	12.06	12.01	10.9	10.38	-0.057154	-0.48937	0.43222
YDR354W	TRP4	9.02	8.74	9.2	9.12	-0.281006	-0.0687	-0.21231
YDR356W	SPC110	8.33	8.18	7.7	7.9	-0.150312	0.16543	-0.31574
YDR357C	CNL1	7.88	9.31	7.8	8.09	1.43017	0.24019	1.18998
YDR358W	GGA1	8.69	9.02	8.2	8.92	0.323529	0.70928	-0.38575
YDR359C	EAF1	7.41	6.49	8.3	8.99	-0.91763	0.72674	-1.64437
YDR361C	BCP1	8.89	8.31	9.2	8.69	-0.586706	-0.53869	-0.04802
YDR362C	TFC6	7.93	7.55	8.9	9.05	-0.383618	0.11198	-0.4956
YDR363W	ESC2	6.71	6.78	7.7	7.89	0.069582	0.22414	-0.15456
YDR363W-A	SEM1	9.14	9.6	8.1	8	0.457772	-0.09009	0.54787
YDR364C	CDC40	7.05	7.62	8.7	8.52	0.56815	-0.1345	0.70265
YDR365C	ESF1	9.01	9.07	10.2	10.6	0.058377	0.41439	-0.35601
YDR366C		3.11	5.05	7.8	8.29	1.9323	0.46815	1.46415
YDR367W	KEI1	8.65	8.43	8.2	7.56	-0.220984	-0.63808	0.4171
YDR368W	YPR1	10.48	10.05	9.7	8.75	-0.428765	-0.90639	0.47762
YDR369C	XRS2	7	7.63	8	8.43	0.627382	0.47258	0.15481
YDR370C		6.95	7.19	8.5	8.46	0.235006	-0.00835	0.24335
YDR371W	CTS2	7.78	7.83	8.4	9.13	0.05534	0.68324	-0.6279
YDR372C	VPS74	9.57	10	9.5	9.78	0.431814	0.25772	0.17409
YDR373W	FRQ1	8.96	9.74	8.9	8.89	0.782492	-0.01003	0.79252
YDR374C		4.6	4.86	4.5	4.42	0.257816	-0.1277	0.38552
YDR374W-A		7.29	8.06	6.8	7.08	0.771777	0.31607	0.4557
YDR375C	BCS1	6.97	6.59	7.9	7.69	-0.384766	-0.17461	-0.21016
YDR376W	ARH1	8.66	9.08	8.9	9.13	0.42656	0.21322	0.21334
YDR377W	ATP17	9.95	9.88	8.4	7.86	-0.076685	-0.49841	0.42173
YDR378C	LSM6	8.85	9.33	8.3	8.36	0.476694	0.07693	0.39976
YDR379C-A		6.39	7.68	6.1	7.04	1.28868	0.94836	0.34032
YDR379W	RGA2	7.8	8.17	8.8	9.55	0.370629	0.7716	-0.40097
YDR380W	ARO10	8.22	9.5	9.3	9.59	1.28429	0.30036	0.98393
YDR381C-A		6.78	7.08	6.1	6.14	0.304016	0.02644	0.27757
YDR381W	YRA1	10.84	8.51	10.4	9.76	-2.33713	-0.63432	-1.7028
YDR382W	RPP2B	13.76	13.34	12.5	12.03	-0.412267	-0.52042	0.10815
YDR383C	NKP1	6.36	6.93	7.5	7.27	0.567562	-0.2229	0.79046
YDR384C	ATO3	9.28	9.45	8.8	8.9	0.168555	0.12668	0.04187
YDR385W	EFT2	16.14	16.56	14.3	14.05	0.424191	-0.27191	0.6961
YDR386W	MUS81	6.81	7.76	8.1	8.18	0.945175	0.03555	0.90963
YDR387C		7.11	6.34	8.7	9.14	-0.771215	0.43444	-1.20566
YDR388W	RVS167	11.22	11.58	10.4	10.72	0.365999	0.29266	0.07334
YDR389W	SAC7	8.38	7.83	9	9.06	-0.544325	0.01888	-0.5632
YDR390C	UBA2	9.01	8.77	9.7	9.28	-0.246983	-0.39782	0.15083
YDR391C		7.46	8.8	7.6	8.46	1.3417	0.90256	0.43914
YDR392W	SPT3	7.78	7.68	7.9	8.33	-0.101625	0.42593	-0.52756
YDR393W	SHE9	6.67	6.57	7.7	7.75	-0.106705	0.02981	-0.13651
YDR394W	RPT3	10.48	10.79	10	10.24	0.309912	0.27877	0.03114
YDR395W	SXM1	11.17	10.39	10.5	10.28	-0.778413	-0.22705	-0.55137
YDR397C	NCB2	8.23	8.05	8.7	8.69	-0.184236	0.00729	-0.19153
YDR398W	UTP5	9.48	8.74	10.4	10.23	-0.737413	-0.17142	-0.566
YDR399W	HPT1	10.12	8.29	9.8	8.88	-1.83024	-0.96573	-0.86451
YDR400W	URH1	8.99	8.78	8.4	8.19	-0.207103	-0.21068	0.00358
YDR402C	DIT2	0.79	3.53	6	6.93	2.74399	0.91318	1.83081
YDR403W	DIT1	4.83	7.02	6.5	7.17	2.18605	0.63412	1.55193
YDR404C	RPB7	8.56	6.58	8.3	8.15	-1.97461	-0.17072	-1.80389
YDR405W	MRP20	7.82	8.52	8.3	8.36	0.693527	0.10629	0.58724
YDR406W	PDR15	8.38	10.45	8.9	10.2	2.06655	1.31195	0.7546
YDR407C	TRS120	8.91	8.7	9.3	9.62	-0.210178	0.31463	-0.5248
YDR408C	ADE8	9.05	7.99	9.3	9.03	-1.06103	-0.2779	-0.78313
YDR409W	SIZ1	7.46	8.52	7.9	8.19	1.06165	0.28686	0.7748
YDR410C	STE14	8.09	8.7	8.6	9.08	0.616638	0.48225	0.13439
YDR411C	DFM1	9.18	9.27	8.9	8.78	0.085445	-0.16176	0.2472
YDR412W	RRP17	8.39	8.44	8.1	7.99	0.05323	-0.07055	0.12378
YDR414C	ERD1	7.08	6.98	8.2	7.7	-0.091054	-0.48586	0.3948
YDR415C		8.77	8.93	8.7	8.35	0.155538	-0.3458	0.50134
YDR416W	SYF1	8.22	8.44	9.2	9.24	0.223495	0.07494	0.14855
YDR418W	RPL12B	13.52	13.27	12	11.3	-0.249131	-0.67464	0.42551
YDR419W	RAD30	7.19	7.53	8.4	8.71	0.340375	0.2745	0.06587
YDR420W	HKR1	8.84	8.69	8.9	9.13	-0.15664	0.22076	-0.3774
YDR421W	ARO80	7.65	7.86	8.4	8.7	0.214254	0.32562	-0.11136
YDR422C	SIP1	8.58	8.07	9.1	9.14	-0.511748	0.02816	-0.53991
YDR423C	CAD1	8.21	8.86	8.3	8.55	0.648701	0.21022	0.43848
YDR424C	DYN2	7.86	8.49	7.2	7.34	0.636894	0.154	0.4829
YDR425W	SNX41	7.95	8.75	7.2	7.56	0.802227	0.36312	0.43911
YDR427W	RPN9	10.24	10.39	9.5	9.71	0.154779	0.2209	-0.06612
YDR428C	BNA7	7.98	7.64	8	7.77	-0.345137	-0.24486	-0.10028
YDR429C	TIF35	10.41	9.97	9.9	9.47	-0.432946	-0.45076	0.01781
YDR430C	CYM1	9.29	9.22	8.6	8.62	-0.067521	0.0301	-0.09762
YDR432W	NPL3	11.5	10.02	9.9	8.53	-1.47971	-1.41025	-0.06946
YDR434W	GPI17	9.68	9.2	9.3	9.28	-0.476454	-0.05389	-0.42257
YDR435C	PPM1	7.46	7.85	7.3	7.98	0.39657	0.66519	-0.26862
YDR436W	PPZ2	7.56	7.83	8.2	8.81	0.275673	0.6017	-0.32603
YDR437W	GPI19	6.62	7.32	6.2	6.59	0.694562	0.37613	0.31843
YDR438W	THI74	2.11	1.31	7.4	7.77	-0.800952	0.41175	-1.2127
YDR439W	LRS4	7	7.35	7.6	7.37	0.3456	-0.2171	0.5627
YDR440W	DOT1	7.22	7.37	8	8.06	0.156741	0.01098	0.14576
YDR441C	APT2	7.61	7.64	6.9	7.26	0.026505	0.32133	-0.29482
YDR443C	SSN2	7.94	7.68	8.2	8.86	-0.264666	0.62782	-0.89249
YDR444W		7.27	7.15	8.5	8.69	-0.118841	0.22969	-0.34853
YDR446W	ECM11	3.88	4.36	4.2	4.32	0.481156	0.06833	0.41283
YDR447C	RPS17B	13.34	13.1	12.6	12.19	-0.233908	-0.42049	0.18658
YDR448W	ADA2	8.51	8.25	9.3	9.01	-0.259946	-0.31045	0.05051
YDR449C	UTP6	8.82	8.84	9.5	9.36	0.016865	-0.14164	0.1585
YDR450W	RPS18A	13.58	13.26	12.4	11.77	-0.317312	-0.58533	0.26802
YDR451C	YHP1	9.41	7.87	9.6	7.84	-1.53231	-1.7787	0.24639
YDR452W	PPN1	9.26	8.42	9.8	9.78	-0.837568	-0.05066	-0.78691
YDR453C	TSA2	8.22	9.04	6.9	7.39	0.816726	0.46363	0.35309
YDR454C	GUK1	11.4	11.41	10.5	9.86	0.007529	-0.67671	0.68424
YDR456W	NHX1	9.38	9.6	8.9	9.26	0.221662	0.32883	-0.10717
YDR457W	TOM1	11.27	11.72	9.7	10.04	0.449547	0.35911	0.09044
YDR458C	HEH2	8.43	8.55	8.7	8.58	0.125131	-0.0839	0.20903
YDR459C	PFA5	6.08	6.72	8.6	8.47	0.64613	-0.09024	0.73637
YDR460W	TFB3	7.87	8.21	8.4	8.22	0.342308	-0.16007	0.50238
YDR461C-A		7.41	8.48	7.5	7.68	1.07232	0.16015	0.91216
YDR461W	MFA1	7.64	8.89	7.2	7.7	1.24962	0.46301	0.78661
YDR462W	MRPL28	8.77	8.9	8.4	8.07	0.133101	-0.31214	0.44524
YDR463W	STP1	9.54	9.37	9.2	9.19	-0.164814	-0.02171	-0.1431
YDR464W	SPP41	8.59	8.71	8.9	9.31	0.121997	0.36713	-0.24513
YDR465C	RMT2	8.74	8.31	9.2	9.26	-0.426375	0.10913	-0.5355
YDR466W	PKH3	7.72	7.75	8.6	8.83	0.037073	0.20746	-0.17038
YDR468C	TLG1	8.3	8.16	8.2	7.55	-0.142294	-0.63837	0.49607
YDR469W	SDC1	7.4	7.79	7.6	7.36	0.38222	-0.21132	0.59354
YDR470C	UGO1	8.03	8.11	7.8	8.04	0.072882	0.27051	-0.19763
YDR471W	RPL27B	12.11	11.73	11.4	10.94	-0.388736	-0.42786	0.03912
YDR472W	TRS31	8.3	7.68	8.7	8.39	-0.618337	-0.27841	-0.33993
YDR473C	PRP3	6.83	7.75	7.5	8.05	0.913853	0.55919	0.35466
YDR475C	JIP4	7.97	8.39	9	9.35	0.424357	0.38612	0.03823
YDR476C		8.31	8.87	7.8	8.38	0.563657	0.59716	-0.0335
YDR477W	SNF1	9.49	9.47	9.2	9.21	-0.018098	0.01565	-0.03375
YDR478W	SNM1	6.97	6.94	7.1	6.98	-0.033038	-0.1371	0.10406
YDR479C	PEX29	7.65	8.39	8.3	8.51	0.745017	0.20217	0.54285
YDR480W	DIG2	7.06	5.96	7.8	7.54	-1.09864	-0.25817	-0.84047
YDR481C	PHO8	10.32	11.38	9.7	10.25	1.05582	0.55299	0.50283
YDR482C	CWC21	6.95	7.81	7.3	7.37	0.862972	0.03066	0.83231
YDR483W	KRE2	11.41	12.21	10.5	10.53	0.797246	0.0369	0.76035
YDR484W	VPS52	7.9	7.89	8.2	8.37	-0.015037	0.17083	-0.18586
YDR485C	VPS72	7.6	8.08	8.6	8.91	0.480823	0.26288	0.21795
YDR486C	VPS60	8.46	8.6	7.7	7.68	0.144456	0.00592	0.13854
YDR487C	RIB3	10.16	10.04	9.7	9.4	-0.123351	-0.33657	0.21321
YDR488C	PAC11	6.52	5.73	7.7	7.29	-0.790946	-0.43524	-0.3557
YDR489W	SLD5	7.41	7.23	7.9	7.77	-0.182648	-0.08609	-0.09656
YDR490C	PKH1	8.67	8.48	8.9	9.5	-0.189106	0.64683	-0.83594
YDR492W	IZH1	8.89	8.63	8.7	8.5	-0.254551	-0.20059	-0.05397
YDR493W	MZM1	7.59	7.61	7	6.88	0.022553	-0.16062	0.18317
YDR494W	RSM28	7.87	7.66	8.4	8.32	-0.206319	-0.07823	-0.12809
YDR495C	VPS3	7.7	8.53	7.9	8.52	0.828544	0.62962	0.19893
YDR496C	PUF6	9.93	9.71	9.9	9.88	-0.219525	-0.02475	-0.19477
YDR497C	ITR1	12.26	11.09	11.9	10.9	-1.17448	-1.00272	-0.17176
YDR498C	SEC20	7.56	7.63	8.5	8.19	0.073402	-0.33671	0.41012
YDR499W	LCD1	6.9	7.74	8.3	8.58	0.843369	0.28928	0.55409
YDR500C	RPL37B	12.24	12.21	11.5	11.1	-0.023723	-0.40478	0.38106
YDR501W	PLM2	6.9	5.56	7.2	5.71	-1.33892	-1.47036	0.13144
YDR502C	SAM2	11.73	8.91	9.8	8.16	-2.82321	-1.62465	-1.19856
YDR503C	LPP1	7.92	7.74	7.7	7.39	-0.187125	-0.26351	0.07639
YDR505C	PSP1	9.22	8.18	8.5	9.1	-1.04218	0.58138	-1.62356
YDR506C		7.8	8.66	7.5	7.87	0.862236	0.4038	0.45844
YDR507C	GIN4	10.08	8.55	9.6	8.54	-1.52474	-1.04183	-0.48291
YDR508C	GNP1	11.8	11.05	11.6	11.22	-0.751942	-0.41914	-0.33281
YDR510W	SMT3	10.77	10.67	9	8.43	-0.099647	-0.54414	0.44449
YDR511W	ACN9	7.99	8.04	7.5	7.44	0.045028	-0.06385	0.10888
YDR512C	EMI1	8.79	9.62	7.8	7.79	0.836433	-0.02685	0.86329
YDR513W	GRX2	10.33	10.93	8.7	8.26	0.597455	-0.44233	1.03979
YDR514C		8.07	7.77	8.4	8.35	-0.297428	-0.04721	-0.25021
YDR515W	SLF1	7.52	8.55	7.1	7.5	1.03034	0.3682	0.66214
YDR516C	EMI2	10.26	10.21	8.8	8.61	-0.050296	-0.21969	0.16939
YDR517W	GRH1	9.5	9.03	9.4	9.55	-0.471699	0.12098	-0.59268
YDR520C	URC2	7.23	7.81	8.9	9.21	0.574709	0.26259	0.31212
YDR523C	SPS1	3.79	4.58	4.8	5.25	0.789268	0.43301	0.35626
YDR524C	AGE1	7.31	7.61	7.8	8.15	0.299593	0.30948	-0.00988
YDR524C-B		14.05	13.61	13.3	12.13	-0.436119	-1.12825	0.69214
YDR527W	RBA50	8.63	8.81	9.4	9.21	0.182665	-0.2128	0.39546
YDR528W	HLR1	6.86	7	7.9	8.07	0.141003	0.2063	-0.0653
YDR529C	QCR7	10.27	10.4	8.7	8.45	0.124357	-0.30339	0.42775
YDR530C	APA2	5.67	6.32	8.3	8.49	0.650965	0.20531	0.44565
YDR531W	CAB1	8.54	8.8	9	8.83	0.255082	-0.19887	0.45395
YDR532C	KRE28	6.66	7.44	7.5	7.55	0.784012	0.02574	0.75827
YDR533C	HSP31	9.95	11.64	9.1	10.21	1.68905	1.15573	0.53332
YDR534C	FIT1	0.79	3.18	6	5.98	2.39281	-0.0161	2.4089
YDR538W	PAD1	5.7	5.19	7.6	7.88	-0.512315	0.2646	-0.77691
YDR539W	FDC1	8.94	8.91	8.9	8.92	-0.033392	-0.0276	-0.00579
YDR540C	IRC4	5.57	5.75	6.1	5.28	0.173672	-0.84919	1.02287
YDR541C		7.02	7.21	8	7.66	0.192696	-0.34854	0.54123
YDR542W	PAU10	2.38	3.18	5.3	5.67	0.806124	0.34246	0.46366
YDR545W	YRF1-1	10.46	10.8	13.3	13.31	0.338151	0.02622	0.31193
YEL001C	IRC22	10.42	10.78	9.5	8.85	0.36173	-0.62616	0.98789
YEL002C	WBP1	11.05	11.26	10.1	9.78	0.202242	-0.28896	0.4912
YEL003W	GIM4	8.67	8.15	7.9	7.32	-0.522692	-0.55717	0.03447
YEL005C	VAB2	6.38	7.58	7.2	7.76	1.20016	0.52571	0.67445
YEL006W	YEA6	6.93	7.7	8.9	8.88	0.772115	-0.03625	0.80837
YEL007W		9.32	10.04	9.3	9.91	0.718581	0.62904	0.08954
YEL009C	GCN4	8.05	11.77	12	12.81	3.71631	0.77562	2.94068
YEL011W	GLC3	8.24	8.76	7.2	7.74	0.518291	0.51088	0.00741
YEL012W	UBC8	8.29	8.89	7.7	8.19	0.595758	0.44816	0.14759
YEL013W	VAC8	10.44	9.43	9.6	9.54	-1.00403	-0.01996	-0.98407
YEL015W	EDC3	9.38	8.69	10	9.5	-0.691384	-0.50802	-0.18336
YEL016C	NPP2	6.98	5.87	9.1	8.95	-1.10556	-0.1289	-0.97666
YEL017C-A	PMP2	10.93	11.36	8.7	8.6	0.436105	-0.14227	0.57837
YEL017W	GTT3	9.01	8.52	8.9	8.44	-0.488634	-0.44727	-0.04136
YEL018W	EAF5	7.33	6.94	8.1	7.85	-0.388839	-0.29431	-0.09453
YEL019C	MMS21	6.15	6.61	6.9	6.5	0.460397	-0.39935	0.85974
YEL020C		6.97	7.32	9	8.69	0.354074	-0.2588	0.61287
YEL020W-A	TIM9	8.39	8	7.6	7.12	-0.388697	-0.46389	0.0752
YEL022W	GEA2	10.09	8.85	9.3	9.57	-1.23864	0.22481	-1.46345
YEL023C		2.6	4.73	7.9	8.4	2.1285	0.51616	1.61234
YEL024W	RIP1	9.91	10.2	8.2	8.33	0.292867	0.15789	0.13498
YEL025C		7.31	8.17	9.4	9.61	0.859357	0.16401	0.69535
YEL026W	SNU13	11.57	11.32	9.7	9.26	-0.252977	-0.44182	0.18884
YEL027W	VMA3	12.95	12.68	10.9	10.75	-0.269799	-0.16818	-0.10162
YEL029C	BUD16	7.65	7.87	8.3	8.54	0.226134	0.27432	-0.04819
YEL030W	ECM10	4.7	6.35	7.6	7.58	1.65531	-0.06994	1.72524
YEL031W	SPF1	12.29	12.48	10.7	10.87	0.186641	0.15844	0.0282
YEL032W	MCM3	9.33	9	9.6	9.52	-0.324255	-0.0564	-0.26786
YEL036C	ANP1	9.9	9.19	10	10.03	-0.714299	0.03015	-0.74445
YEL037C	RAD23	10.48	9.98	9.7	9.98	-0.495571	0.26686	-0.76243
YEL038W	UTR4	9.06	8.61	8.7	8.76	-0.449863	0.08035	-0.53021
YEL039C	CYC7	6.02	7.46	4.9	5.87	1.43756	1.00191	0.43565
YEL040W	UTR2	11.33	10.36	10.9	9.87	-0.969784	-1.03414	0.06435
YEL042W	GDA1	10.84	7.66	9.5	8.88	-3.17717	-0.58072	-2.59645
YEL043W		8.48	9.08	9	8.86	0.59865	-0.14209	0.74074
YEL044W	IES6	8.18	8.36	8.7	9.12	0.176634	0.45993	-0.2833
YEL046C	GLY1	11.86	12.34	11	11.41	0.485796	0.37191	0.11388
YEL047C		11.05	10.42	10	9.24	-0.626432	-0.78526	0.15883
YEL048C	TCA17	7.67	7.66	7.7	7.44	-0.004318	-0.24397	0.23965
YEL049W	PAU2	2.11	2.9	5.4	6.19	0.784534	0.78388	0.00065
YEL050C	RML2	8.59	6.84	8.5	8.47	-1.74218	-0.03225	-1.70994
YEL051W	VMA8	10.93	10.65	9.9	9.43	-0.282057	-0.51328	0.23122
YEL052W	AFG1	8.86	8.43	9	9.1	-0.429427	0.08876	-0.51819
YEL053C	MAK10	7.78	7.92	8.5	8.77	0.132314	0.27339	-0.14107
YEL054C	RPL12A	13.18	12.59	11.8	11.06	-0.598109	-0.72473	0.12662
YEL055C	POL5	10.16	9.58	9.7	9.4	-0.574857	-0.33071	-0.24415
YEL056W	HAT2	8.68	8.33	9	8.51	-0.348561	-0.4555	0.10694
YEL057C		4.04	5.65	5.5	6.05	1.60813	0.55482	1.0533
YEL058W	PCM1	10.49	9.75	10.5	10.45	-0.736118	-0.07803	-0.65809
YEL059C-A	SOM1	6.62	8.15	5.8	6.31	1.5234	0.47787	1.04553
YEL060C	PRB1	11.99	12.58	10.2	11.18	0.584668	0.99517	-0.4105
YEL061C	CIN8	8.09	8.1	8.1	8.01	0.006922	-0.1357	0.14262
YEL062W	NPR2	7.76	8.49	8.7	8.66	0.731994	-0.04787	0.77987
YEL063C	CAN1	10.1	10.03	9	9.66	-0.064986	0.63929	-0.70428
YEL064C	AVT2	7.01	6.96	7.6	6.92	-0.044606	-0.64987	0.60526
YEL065W	SIT1	6.23	6.55	7.4	7.01	0.321066	-0.39449	0.71555
YEL066W	HPA3	8.93	9.23	8.1	7.83	0.300739	-0.27143	0.57217
YEL067C		2.79	5.04	4.8	4.38	2.24543	-0.44558	2.69101
YEL070W	DSF1	3.88	4.25	4.7	5.64	0.369333	0.92982	-0.56048
YEL071W	DLD3	11.23	11.52	12.5	12.32	0.290495	-0.18756	0.47806
YEL072W	RMD6	4.25	5.19	7.2	6.6	0.941923	-0.57376	1.51568
YEL073C		6.57	5.12	6.7	5.14	-1.45169	-1.589	0.13731
YEL075C		5.9	5.9	7.8	7.44	0.004595	-0.39173	0.39633
YEL077C		9.74	10.27	12.5	12.52	0.527015	-0.00371	0.53072
YER001W	MNN1	10.68	9.28	9.9	8.98	-1.39911	-0.95603	-0.44308
YER002W	NOP16	9.1	8.87	8.6	8.44	-0.228195	-0.14556	-0.08263
YER003C	PMI40	11.8	10.16	10	8.58	-1.63786	-1.4108	-0.22706
YER004W	FMP52	9.44	10.71	9.2	9.53	1.26988	0.36134	0.90854
YER005W	YND1	7.72	8.1	9.3	9.29	0.387003	0.0161	0.3709
YER006W	NUG1	10.36	9.79	10.4	10.26	-0.568432	-0.10826	-0.46017
YER007C-A	TMA20	9.59	9.44	8.6	8.31	-0.152474	-0.32481	0.17234
YER007W	PAC2	6.51	6.81	7.8	8.15	0.307146	0.35838	-0.05123
YER008C	SEC3	9.08	8.98	9.1	9.45	-0.104529	0.32835	-0.43288
YER009W	NTF2	11.55	11.14	10.5	9.81	-0.406955	-0.67333	0.26638
YER010C		7.9	7.59	8	7.8	-0.304619	-0.1908	-0.11382
YER011W	TIR1	6.97	4.53	5.2	4.49	-2.43631	-0.74785	-1.68846
YER012W	PRE1	10.04	10.34	8.5	8.83	0.292166	0.33332	-0.04115
YER013W	PRP22	8.47	8.86	8.8	9.32	0.396853	0.48226	-0.0854
YER014W	HEM14	8.97	9.21	8.7	8.55	0.236574	-0.11129	0.34786
YER015W	FAA2	5.96	6.9	7.3	8.11	0.935583	0.80898	0.1266
YER016W	BIM1	8.3	7.54	8.6	8.25	-0.759193	-0.30915	-0.45005
YER017C	AFG3	9.16	9.12	9.1	9.68	-0.042937	0.57445	-0.61739
YER018C	SPC25	7.56	6.41	8.7	8.62	-1.15349	-0.03815	-1.11534
YER019C-A	SBH2	9.75	9.3	9.4	9.4	-0.451911	-0.0015	-0.45041
YER019W	ISC1	9.11	8.15	10.1	9.01	-0.96112	-1.11901	0.15789
YER020W	GPA2	8.29	8.39	8.8	8.93	0.108215	0.15041	-0.0422
YER021W	RPN3	10.7	10.64	10.2	10.46	-0.059452	0.28982	-0.34927
YER022W	SRB4	8.55	8.54	8.8	8.68	-0.010142	-0.07793	0.06779
YER025W	GCD11	11.72	10.89	10.6	10.4	-0.826335	-0.2219	-0.60444
YER026C	CHO1	10.84	9.79	10.2	9.3	-1.04571	-0.87075	-0.17496
YER027C	GAL83	9.41	8.82	8.7	8.63	-0.593873	-0.05563	-0.53824
YER028C	MIG3	6.18	7.06	7.4	8.39	0.875137	0.98583	-0.11069
YER029C	SMB1	8.21	8.19	8	7.65	-0.019915	-0.32209	0.30218
YER030W	CHZ1	9.03	9.13	7.5	7.47	0.102486	-0.06126	0.16374
YER031C	YPT31	10.41	9.81	9.7	8.85	-0.602028	-0.80807	0.20604
YER032W	FIR1	8.03	7.66	8.1	7.63	-0.37548	-0.51542	0.13994
YER033C	ZRG8	7.59	8.33	7.3	8	0.737176	0.65061	0.08656
YER034W		7.82	8.31	8.2	8.52	0.489249	0.32982	0.15943
YER035W	EDC2	8.76	9.6	8.6	8.52	0.831285	-0.07363	0.90491
YER036C	ARB1	12.24	11.61	11.1	10.9	-0.627688	-0.23612	-0.39157
YER037W	PHM8	9.08	10.16	8.4	9.24	1.08665	0.86847	0.21818
YER038C	KRE29	5.46	6.51	7.3	7.63	1.0431	0.3509	0.6922
YER039C-A		4.31	6.22	3.9	5.14	1.90398	1.23155	0.67243
YER040W	GLN3	7.54	8.39	8.4	8.69	0.844414	0.26904	0.57538
YER041W	YEN1	6	6.56	8.7	8.7	0.556242	0.00217	0.55407
YER042W	MXR1	8.82	8.29	7.3	6.83	-0.533926	-0.50972	-0.0242
YER043C	SAH1	13.96	12.96	11.2	10.66	-1.00034	-0.49151	-0.50883
YER044C	ERG28	8.51	8.83	7.7	7.93	0.317202	0.26556	0.05165
YER044C-A	MEI4	4.18	5.77	6.3	6.53	1.58766	0.20367	1.38399
YER045C	ACA1	6.04	7.31	7.1	8.43	1.27339	1.36617	-0.09278
YER046W	SPO73	5.28	6.3	6.4	6.46	1.01409	0.01807	0.99602
YER047C	SAP1	7.96	7.74	8.2	8.58	-0.21687	0.34137	-0.55824
YER048C	CAJ1	10.21	9.97	9.2	8.93	-0.239782	-0.31306	0.07328
YER048W-A	ISD11	8.69	8.76	7.9	7.56	0.062678	-0.3259	0.38858
YER049W	TPA1	10.45	9.98	10.4	10.34	-0.464454	-0.07257	-0.39188
YER050C	RSM18	8.18	7.79	7.9	7.22	-0.395153	-0.65044	0.25529
YER051W	JHD1	6.64	7.28	8.3	8.57	0.644008	0.28049	0.36351
YER052C	HOM3	10.29	11.02	9.8	10.18	0.728097	0.41312	0.31497
YER053C	PIC2	8.47	8.31	7.8	8.16	-0.167101	0.31355	-0.48065
YER053C-A		7.62	8.74	5.6	5.21	1.11299	-0.43263	1.54562
YER054C	GIP2	6.39	6.5	6.8	7.4	0.114097	0.5738	-0.4597
YER055C	HIS1	11.21	11.26	10.9	10.82	0.050143	-0.06012	0.11026
YER056C	FCY2	11.16	10.82	11.7	11.82	-0.333179	0.16742	-0.5006
YER056C-A	RPL34A	12.9	12.76	11.6	11.06	-0.143167	-0.50341	0.36024
YER057C	HMF1	9.42	10.16	8.7	9.04	0.742698	0.33079	0.41191
YER058W	PET117	7.04	7.66	5.9	5.84	0.621491	-0.07498	0.69647
YER059W	PCL6	8.04	7.73	8.4	8.07	-0.313799	-0.29321	-0.02059
YER060W	FCY21	7.25	7.03	8.1	7.83	-0.221415	-0.25886	0.03745
YER060W-A	FCY22	8.1	7.62	8.6	8.31	-0.485796	-0.32381	-0.16198
YER061C	CEM1	8	8.22	8.1	8.09	0.224286	-0.06087	0.28516
YER062C	HOR2	11.27	11.01	9.3	9.4	-0.25718	0.145	-0.40218
YER063W	THO1	9.34	8.61	8.6	8.02	-0.728186	-0.61249	-0.1157
YER064C		9.57	9.99	10.3	10.71	0.418409	0.41851	-0.00011
YER065C	ICL1	3.79	3.63	7.4	7.42	-0.156606	-0.01003	-0.14657
YER066W	RRT13	4.79	3.9	7	7.02	-0.894664	-0.00753	-0.88714
YER067W	RGI1	8.24	7.79	6.1	5.42	-0.450791	-0.66183	0.21104
YER068W	MOT2	9.67	9.69	9.2	9.03	0.012391	-0.13084	0.14323
YER069W	ARG5,6	11.25	11.45	10.2	10.75	0.201372	0.53095	-0.32957
YER070W	RNR1	12.6	10.4	11.5	9.52	-2.20078	-2.02446	-0.17632
YER071C		7	7.71	6.9	6.91	0.706454	-0.01089	0.71735
YER072W	VTC1	10.38	9.71	8.3	8.45	-0.672352	0.12573	-0.79808
YER073W	ALD5	10.49	10.34	10.1	10.01	-0.145215	-0.09722	-0.04799
YER074W	RPS24A	13.91	13.69	12.4	11.86	-0.218994	-0.53936	0.32037
YER074W-A	YOS1	8.48	8.58	7.6	7.14	0.105021	-0.43813	0.54315
YER075C	PTP3	8.24	8.36	8.6	8.56	0.115873	-0.05121	0.16708
YER076C		5.62	6.05	7.5	7.55	0.426089	0.04733	0.37876
YER077C		8.08	8.11	9	8.6	0.021788	-0.3695	0.39129
YER078C	ICP55	7.65	7.14	8.1	7.87	-0.506549	-0.1871	-0.31945
YER079W		7.67	8.36	6.8	6.6	0.682505	-0.18468	0.86719
YER080W	AIM9	10.16	10.41	8.9	8.82	0.248927	-0.06223	0.31116
YER081W	SER3	7.62	7.84	9.8	11.22	0.211314	1.38604	-1.17473
YER082C	UTP7	9.15	8.98	9.6	9.52	-0.161461	-0.07738	-0.08408
YER083C	GET2	9.25	8.99	8.7	8.6	-0.263436	-0.14088	-0.12256
YER086W	ILV1	11.35	11.64	10.1	10.1	0.284976	0.00586	0.27912
YER087C-B	SBH1	8.97	9.02	7.9	7.38	0.048865	-0.51006	0.55893
YER087W	AIM10	8.08	7.8	8.2	8.09	-0.272537	-0.12615	-0.14639
YER088C	DOT6	9.89	9.14	9.8	10.67	-0.751172	0.89118	-1.64235
YER089C	PTC2	9.69	9.5	9.2	9.48	-0.196605	0.25395	-0.45055
YER090W	TRP2	10.93	10.8	9.7	9.78	-0.129386	0.08683	-0.21622
YER091C	MET6	13.57	9.66	10.4	8.52	-3.90927	-1.87441	-2.03486
YER092W	IES5	8.19	8.66	8.3	8.18	0.472145	-0.07041	0.54256
YER093C	TSC11	7.85	8.54	8.3	8.84	0.697767	0.52855	0.16921
YER093C-A	AIM11	6.38	6.62	5.9	6	0.241999	0.09848	0.14352
YER094C	PUP3	10.37	10.75	9.8	10.27	0.378977	0.43238	-0.0534
YER095W	RAD51	9.33	8.8	9.5	8.51	-0.537347	-0.94274	0.40539
YER096W	SHC1	5.72	6.91	6.3	6.38	1.18715	0.11628	1.07088
YER098W	UBP9	6.55	7.9	7.5	8.18	1.35721	0.72438	0.63283
YER099C	PRS2	9.12	8.37	9.1	9.09	-0.745364	-0.05695	-0.68842
YER100W	UBC6	9.37	9.27	8.6	8.57	-0.091378	-0.05519	-0.03619
YER101C	AST2	7.62	7.88	7.8	7.93	0.260002	0.09386	0.16614
YER102W	RPS8B	14.41	14.19	13.8	13.21	-0.222808	-0.62108	0.39827
YER103W	SSA4	10	12.47	9.6	10.62	2.47428	1.05333	1.42094
YER104W	RTT105	7.22	7.14	7.4	6.77	-0.080829	-0.59141	0.51058
YER105C	NUP157	10.38	10.58	10	10.15	0.200054	0.12312	0.07694
YER106W	MAM1	4.18	4.04	5.3	3.97	-0.138686	-1.34292	1.20424
YER107C	GLE2	9.01	7.67	9.6	9.15	-1.3413	-0.43425	-0.90704
YER109C	FLO8	6.95	7.06	8.7	8.58	0.105975	-0.07721	0.18318
YER110C	KAP123	13.2	12.34	11	10.8	-0.85974	-0.24949	-0.61025
YER111C	SWI4	8.71	8.46	8.3	8.52	-0.24485	0.18174	-0.42659
YER112W	LSM4	8.71	8.52	7.4	7.56	-0.18369	0.17419	-0.35788
YER113C	TMN3	8.89	8.65	9	8.67	-0.247121	-0.28722	0.04009
YER114C	BOI2	9.48	8.68	9.3	9.06	-0.801011	-0.24954	-0.55147
YER115C	SPR6	6.02	5.15	8.4	7.76	-0.866814	-0.60018	-0.26663
YER116C	SLX8	7.27	7.87	7.7	7.82	0.601733	0.07628	0.52545
YER117W	RPL23B	13.47	13.23	12.9	12.3	-0.244792	-0.61704	0.37225
YER118C	SHO1	9.03	8.49	8.8	8.12	-0.540432	-0.65286	0.11243
YER119C	AVT6	9.66	10.47	9.3	9.65	0.811789	0.33805	0.47374
YER120W	SCS2	11.42	10.44	9.9	9.23	-0.981518	-0.67562	-0.30589
YER121W		4.92	6.73	5.1	5.89	1.81307	0.83664	0.97643
YER122C	GLO3	10.22	9.4	10	9.56	-0.82069	-0.44038	-0.38031
YER123W	YCK3	8.17	8.02	8.1	8.47	-0.142943	0.34185	-0.48479
YER124C	DSE1	11.04	11.13	11.5	11.6	0.085764	0.10057	-0.01481
YER125W	RSP5	10.73	8.12	9.2	9.56	-2.61214	0.40528	-3.01742
YER126C	NSA2	9.48	9.13	9.5	9.39	-0.353392	-0.12908	-0.22431
YER127W	LCP5	8.85	8.52	9.5	9.42	-0.334446	-0.08954	-0.24491
YER128W		7.03	7.76	6.7	6.65	0.731255	-0.0321	0.76335
YER129W	SAK1	7.5	7.18	9.3	9.62	-0.31969	0.33696	-0.65665
YER130C		8.35	8.97	9.3	9.67	0.619194	0.35587	0.26332
YER131W	RPS26B	12.26	11.84	11.3	10.67	-0.413741	-0.60961	0.19587
YER132C	PMD1	8.17	8.33	8.8	9.18	0.158433	0.40754	-0.24911
YER133W	GLC7	10.69	10.55	9.5	9.76	-0.139566	0.23823	-0.3778
YER134C		8.48	8.45	7.9	7.54	-0.027194	-0.31637	0.28918
YER136W	GDI1	10.94	10.85	9.6	9.59	-0.091705	-0.00573	-0.08598
YER137C		6.42	6.63	6.4	6.95	0.212505	0.55169	-0.33919
YER138W-A		3.38	5.63	8.3	8.81	2.25721	0.46484	1.79238
YER139C	RTR1	7.13	7.55	7.2	7.45	0.417485	0.21368	0.20381
YER140W		7.46	7.51	8.3	8.2	0.043702	-0.09848	0.14218
YER141W	COX15	10.07	10.34	9.3	9.35	0.264136	0.01558	0.24855
YER142C	MAG1	6.82	8.11	6.9	7.77	1.28923	0.89007	0.39915
YER143W	DDI1	8.87	9.09	8.6	8.86	0.218576	0.21836	0.00021
YER144C	UBP5	7.53	8.16	8.6	8.62	0.630618	0.07107	0.55955
YER145C	FTR1	10.03	9.48	10	9.28	-0.559077	-0.76601	0.20693
YER146W	LSM5	9.35	9.24	8.9	8.11	-0.106137	-0.83553	0.72939
YER147C	SCC4	7.73	8.27	8.8	9.03	0.544822	0.22745	0.31738
YER148W	SPT15	9.15	9.07	9.7	9.37	-0.074376	-0.32026	0.24589
YER149C	PEA2	8.34	7.67	8.4	8.49	-0.674215	0.06953	-0.74374
YER150W	SPI1	9.95	10.39	8.3	8.09	0.433556	-0.17722	0.61077
YER151C	UBP3	9.74	9.21	9.3	9.56	-0.523929	0.2511	-0.77503
YER152C		8.93	8.36	10.4	10.38	-0.563161	-0.0398	-0.52336
YER153C	PET122	5.86	6.99	7.6	7.67	1.13449	0.03108	1.10341
YER154W	OXA1	8.56	8.8	8.8	8.66	0.241079	-0.18287	0.42395
YER155C	BEM2	10.48	9.88	10	10.15	-0.591554	0.13948	-0.73103
YER156C		9.77	9.12	9.4	8.79	-0.654562	-0.58607	-0.06849
YER157W	COG3	8.83	8.64	9.2	9.36	-0.197104	0.15753	-0.35463
YER158C		7.29	8.18	7.5	9.14	0.885052	1.65503	-0.76998
YER159C	BUR6	8.55	9.71	8.5	8.94	1.15404	0.45723	0.6968
YER161C	SPT2	7.85	8.25	8	7.92	0.40559	-0.03488	0.44047
YER162C	RAD4	7.27	8.2	8	8.8	0.929376	0.75346	0.17592
YER163C		8.66	9.63	8.6	9.01	0.970944	0.42565	0.54529
YER164W	CHD1	9.7	9.29	8.9	9.02	-0.405139	0.07396	-0.4791
YER165W	PAB1	13.01	11.44	11.1	10.89	-1.57012	-0.16683	-1.4033
YER166W	DNF1	10.13	9.65	9.5	9.56	-0.47714	0.11112	-0.58826
YER167W	BCK2	8.23	8.22	9.2	9.62	-0.00466	0.42649	-0.43115
YER168C	CCA1	9.34	9.16	9.3	9.18	-0.178935	-0.10264	-0.0763
YER169W	RPH1	7.76	7.51	8.9	9.9	-0.253873	1.01101	-1.26488
YER170W	ADK2	6.86	6.03	7	6.15	-0.825671	-0.85294	0.02727
YER171W	RAD3	8.57	8.13	9.3	9.49	-0.434046	0.21605	-0.6501
YER172C	BRR2	9.58	9.19	9.1	9.39	-0.385628	0.2667	-0.65232
YER173W	RAD24	6.51	7.67	8.6	8.63	1.16651	0.02734	1.13918
YER174C	GRX4	8.33	8.09	8.7	8.3	-0.240075	-0.35255	0.11248
YER175C	TMT1	7.31	7.8	7.2	7.44	0.484055	0.23863	0.24542
YER176W	ECM32	8.42	9.05	9.1	9.42	0.627841	0.32892	0.29892
YER177W	BMH1	13.29	12.81	12.7	11.85	-0.478999	-0.80411	0.32511
YER178W	PDA1	12.74	12.81	10.9	10.63	0.065319	-0.28606	0.35138
YER179W	DMC1	5.55	7.19	5.1	5.84	1.63951	0.76986	0.86965
YER180C-A	SLO1	6.76	7.07	5.2	5.47	0.313132	0.29003	0.0231
YER182W	FMP10	7.6	7.86	7	6.91	0.255422	-0.06427	0.31969
YER183C	FAU1	8.38	8.38	8.2	7.79	-0.004984	-0.38075	0.37576
YER184C		5	5.7	7.7	8.24	0.699939	0.56179	0.13815
YER185W	PUG1	5.31	5.05	6.4	6.47	-0.268342	0.08295	-0.35129
YER186C		3.49	3.05	8.1	8.2	-0.442705	0.11962	-0.56233
YER187W		-31.39	-31.45	4.7	2.62	-0.064121	-2.04796	1.98383
YFL001W	DEG1	8.05	8.32	8.5	8.81	0.263294	0.2946	-0.03131
YFL002C	SPB4	8.6	8.67	9.1	8.93	0.069301	-0.12861	0.19791
YFL003C	MSH4	5.34	6.32	7.1	7.17	0.979288	0.04212	0.93717
YFL004W	VTC2	10.12	9.69	9.8	9.65	-0.432661	-0.15755	-0.27511
YFL005W	SEC4	10.24	9.98	9	8.75	-0.262632	-0.24061	-0.02203
YFL007W	BLM10	10.5	10.26	9.7	10.48	-0.236485	0.77813	-1.01461
YFL008W	SMC1	9.42	9.15	8.5	8.76	-0.272555	0.28772	-0.56027
YFL009W	CDC4	9.26	8.64	9.9	9.95	-0.62161	0.01209	-0.6337
YFL010C	WWM1	11.27	10.65	9.9	9.37	-0.620176	-0.50639	-0.11379
YFL011W	HXT10	3.6	2.72	4.3	4.92	-0.878221	0.60105	-1.47927
YFL013C	IES1	8.65	8.9	8.8	8.84	0.253763	0.03667	0.21709
YFL014W	HSP12	12.91	12.03	11.5	9.98	-0.881244	-1.48826	0.60701
YFL016C	MDJ1	10.14	10.8	9.4	9.75	0.662298	0.38579	0.27651
YFL017C	GNA1	8.82	7.76	8.4	7.47	-1.05986	-0.92935	-0.13051
YFL017W-A	SMX2	8.23	8.05	7.4	6.63	-0.174689	-0.72542	0.55074
YFL018C	LPD1	11.85	11.8	10.1	9.72	-0.057763	-0.39529	0.33753
YFL020C	PAU5	1.79	2.72	6	6.26	0.92871	0.28381	0.6449
YFL021W	GAT1	8.58	9.88	8.5	9.18	1.29144	0.69815	0.59329
YFL022C	FRS2	11.67	11.1	10.4	10.32	-0.574379	-0.08929	-0.48509
YFL023W	BUD27	8.8	9.1	8.8	9.14	0.30221	0.31839	-0.01618
YFL024C	EPL1	7.56	7.67	8.3	9.52	0.112804	1.17676	-1.06395
YFL025C	BST1	8.33	7.93	8.5	8.59	-0.403437	0.10374	-0.50718
YFL026W	STE2	10.89	10.88	11.6	11.18	-0.013044	-0.38506	0.37201
YFL027C	GYP8	7.11	7.75	8.9	9.21	0.635756	0.30449	0.33127
YFL028C	CAF16	8.59	8.73	8.6	8.68	0.146232	0.05847	0.08776
YFL029C	CAK1	7.57	7.97	7.9	8.26	0.392452	0.31655	0.07591
YFL030W	AGX1	5.77	7.27	6.7	7.86	1.49801	1.1183	0.37971
YFL031W	HAC1	7.57	7.9	11.3	11.18	0.32983	-0.08459	0.41442
YFL033C	RIM15	8.25	9.01	8.6	9.58	0.76739	0.969	-0.20161
YFL034C-A	RPL22B	8.74	6.63	10.3	10.32	-2.11082	0.0527	-2.16352
YFL034C-B	MOB2	8.28	7.81	8.1	7.64	-0.46705	-0.41583	-0.05122
YFL034W		8.23	7.86	8.4	8.69	-0.366123	0.32686	-0.69298
YFL036W	RPO41	9.16	8.89	8.3	8.77	-0.271348	0.45135	-0.7227
YFL037W	TUB2	12.13	11.14	10.6	9.45	-0.989937	-1.15259	0.16266
YFL038C	YPT1	11.47	11.5	9.9	9.75	0.02835	-0.15118	0.17953
YFL039C	ACT1	14.59	14.83	12.5	12.46	0.234408	-0.04473	0.27914
YFL041W	FET5	9.27	9.68	8.7	8.84	0.415901	0.15861	0.25729
YFL042C		7.87	8.28	8.3	8.68	0.418192	0.42716	-0.00897
YFL044C	OTU1	8.42	9.68	7.9	8.72	1.26475	0.83143	0.43333
YFL045C	SEC53	12.3	9.93	11.3	9.9	-2.36969	-1.39063	-0.97906
YFL047W	RGD2	8.65	8.96	9.1	9.19	0.309822	0.08573	0.22409
YFL048C	EMP47	10.57	10.28	9.5	9.06	-0.28358	-0.45247	0.16889
YFL049W	SWP82	7.38	7.73	8.9	8.88	0.345749	0.02237	0.32337
YFL050C	ALR2	2.79	4.25	8.1	8.65	1.4586	0.59561	0.86298
YFL053W	DAK2	3.25	4.47	3.6	5.56	1.22567	1.93376	-0.70809
YFL054C		6.42	6.44	7.4	8.35	0.01959	0.99859	-0.979
YFL055W	AGP3	4.74	7.37	6.8	8.01	2.62568	1.16317	1.46251
YFL058W	THI5	6.78	9.14	7.3	8.5	2.35924	1.24229	1.11695
YFL059W	SNZ3	7.52	8.59	8.2	8.46	1.06804	0.22721	0.84083
YFL060C	SNO3	5.31	6.41	7	7.07	1.09742	0.07978	1.01764
YFL062W	COS4	10.41	10.65	9.3	9.47	0.235326	0.15388	0.08145
YFL066C		8.2	8.83	10.8	10.89	0.625795	0.09627	0.52953
YFR001W	LOC1	8.32	7.86	7.9	7.46	-0.466406	-0.38753	-0.07887
YFR002W	NIC96	10.1	9.89	9.9	9.82	-0.213454	-0.07743	-0.13603
YFR003C	YPI1	8.54	9.62	7.9	8.36	1.0826	0.43139	0.6512
YFR004W	RPN11	10.15	10.6	9.5	9.77	0.451568	0.25963	0.19194
YFR005C	SAD1	7.03	7.36	8.9	8.54	0.335023	-0.31665	0.65167
YFR006W		10.04	9.98	9.4	9.16	-0.062224	-0.2796	0.21737
YFR007W	YFH7	7.23	7.61	7.2	7.41	0.373741	0.21788	0.15586
YFR008W	FAR7	7.37	7.32	6.9	6.96	-0.0452	0.08926	-0.13446
YFR009W	GCN20	11.18	10.52	10.4	10.02	-0.660658	-0.33843	-0.32223
YFR010W	UBP6	10.27	10.43	9.6	9.52	0.154084	-0.10398	0.25806
YFR011C	AIM13	8.79	8.34	7.5	7.25	-0.453037	-0.23029	-0.22274
YFR012W		4.18	6.01	4.4	5.24	1.83147	0.80908	1.02239
YFR013W	IOC3	8.49	8.84	9.1	9.2	0.343813	0.11356	0.23025
YFR014C	CMK1	8.15	8.4	8.1	8.72	0.251042	0.63071	-0.37967
YFR015C	GSY1	8.13	6.51	7.2	6.27	-1.62423	-0.88202	-0.74221
YFR016C		9.6	10.11	8.6	9.47	0.510052	0.89461	-0.38456
YFR017C		7.35	8.25	6.4	6.99	0.892937	0.59564	0.29729
YFR018C		8.18	9.6	9	9.98	1.42613	1.0012	0.42492
YFR019W	FAB1	9.61	9.94	9.1	9.55	0.326241	0.39892	-0.07268
YFR021W	ATG18	8.48	8.34	8.4	8.31	-0.137917	-0.05635	-0.08157
YFR022W	ROG3	6.81	6.44	8.7	8.76	-0.373979	0.02512	-0.3991
YFR023W	PES4	5.7	6.74	6.7	7.01	1.03916	0.28236	0.7568
YFR024C-A	LSB3	10.35	10.31	9.7	9.73	-0.038176	0.06038	-0.09856
YFR025C	HIS2	8.54	8.46	8.9	8.94	-0.084868	0.03689	-0.12176
YFR026C	ULI1	0.79	2.89	6.1	6.13	2.10329	0.02939	2.0739
YFR027W	ECO1	6.61	5.82	7	6.59	-0.7952	-0.35724	-0.43796
YFR028C	CDC14	9.6	8.72	10	9.45	-0.884161	-0.51015	-0.37401
YFR029W	PTR3	7.64	7.45	8.3	8.82	-0.180517	0.50731	-0.68783
YFR030W	MET10	8.01	8.28	9.4	9.62	0.267679	0.16804	0.09964
YFR031C	SMC2	8.22	8.6	8.5	8.79	0.383744	0.32753	0.05622
YFR031C-A	RPL2A	14.05	13.84	13.2	12.56	-0.211685	-0.62068	0.40899
YFR032C	RRT5	3.25	2.33	5.7	4.01	-0.922575	-1.64693	0.72436
YFR033C	QCR6	9.25	9.87	9	9.04	0.62102	0.01753	0.60349
YFR036W	CDC26	7.51	7.84	6.1	6.46	0.332645	0.32921	0.00343
YFR037C	RSC8	9.82	9.2	10.2	9.71	-0.615557	-0.48778	-0.12777
YFR038W	IRC5	8.07	8.37	9.1	9.12	0.301779	0.04302	0.25876
YFR039C		8.73	8.84	9.1	9.19	0.10894	0.08907	0.01987
YFR040W	SAP155	8.88	7.93	7.9	9	-0.958245	1.11191	-2.07016
YFR041C	ERJ5	8.48	8.02	7.6	7.28	-0.46135	-0.30262	-0.15873
YFR042W	KEG1	8.51	7.94	8.3	7.54	-0.572932	-0.73949	0.16656
YFR043C	IRC6	7.56	7.66	7.6	7.47	0.097126	-0.10743	0.20456
YFR044C	DUG1	11.9	11.48	10.1	9.75	-0.418671	-0.3063	-0.11237
YFR045W		7.11	7.89	7.3	7.38	0.774842	0.08907	0.68577
YFR046C	CNN1	6.15	6.8	7.4	7.48	0.646556	0.11946	0.52709
YFR047C	BNA6	10.36	10.12	9.1	8.57	-0.236962	-0.54951	0.31254
YFR048W	RMD8	7.73	7.91	9	8.75	0.180197	-0.25016	0.43035
YFR049W	YMR31	8.44	8.7	7.3	7.15	0.261604	-0.19887	0.46048
YFR050C	PRE4	10.23	10.54	9.3	9.65	0.308744	0.3917	-0.08296
YFR051C	RET2	10.89	10.17	9.9	9.46	-0.726311	-0.48718	-0.23914
YFR052W	RPN12	10.11	10.28	9.2	9.48	0.171505	0.2749	-0.1034
YFR053C	HXK1	12.69	11.74	9.5	8.43	-0.955576	-1.02096	0.06539
YFR055W	IRC7	6.57	8.28	8.2	8.85	1.7051	0.67938	1.02572
YGL001C	ERG26	9.75	9.75	9.7	9.44	0.00194	-0.27021	0.27215
YGL002W	ERP6	7.76	8.18	7.9	7.94	0.414597	0.04645	0.36815
YGL003C	CDH1	7.23	7.43	8.2	8.26	0.208324	0.07045	0.13787
YGL004C	RPN14	7.87	8.47	7.7	8.23	0.592568	0.51172	0.08085
YGL005C	COG7	7.46	7.28	7.6	7.52	-0.180249	-0.1145	-0.06574
YGL008C	PMA1	16.56	15.06	14.3	14	-1.49413	-0.34113	-1.153
YGL009C	LEU1	11.89	11.27	10.3	9.88	-0.611931	-0.4513	-0.16063
YGL010W		7.59	8.47	6.8	6.82	0.883557	-0.01195	0.8955
YGL011C	SCL1	10.73	11.11	9.2	9.64	0.378428	0.39617	-0.01775
YGL012W	ERG4	11.62	11.47	10.6	10.5	-0.154252	-0.10829	-0.04596
YGL013C	PDR1	9.09	9.45	9	9.54	0.356256	0.57577	-0.21952
YGL014W	PUF4	9.09	7.51	9.3	9.29	-1.58002	0.00332	-1.58334
YGL016W	KAP122	10.07	9.23	9.5	9.81	-0.844849	0.27267	-1.11752
YGL017W	ATE1	8.26	7.9	8.9	8.7	-0.36583	-0.24181	-0.12402
YGL018C	JAC1	7.59	7.35	6.8	6.7	-0.239966	-0.11083	-0.12914
YGL019W	CKB1	9.65	9.41	9.2	8.83	-0.234947	-0.38514	0.1502
YGL020C	GET1	9.15	9.13	9.1	8.54	-0.021106	-0.52462	0.50351
YGL021W	ALK1	9.64	8.76	9.9	8.96	-0.876929	-0.93392	0.05699
YGL023C	PIB2	8.23	8.84	9	9.42	0.602437	0.44323	0.1592
YGL025C	PGD1	8.08	8.08	8.5	8.46	-0.000317	-0.06556	0.06524
YGL026C	TRP5	12.3	12.4	10.8	11.14	0.101685	0.3279	-0.22622
YGL027C	CWH41	10.22	9.68	9.2	8.99	-0.537307	-0.1749	-0.3624
YGL028C	SCW11	10.76	11.47	10.6	11.24	0.709373	0.63295	0.07643
YGL029W	CGR1	7.74	8.24	7	6.95	0.499501	-0.04072	0.54022
YGL030W	RPL30	13.43	12.84	12.4	12.04	-0.589264	-0.34154	-0.24773
YGL031C	RPL24A	13.11	12.68	12	11.21	-0.424791	-0.79314	0.36835
YGL032C	AGA2	8.12	7.7	7.1	6.88	-0.424306	-0.18376	-0.24054
YGL035C	MIG1	8.92	8.97	8.3	8.96	0.04944	0.66027	-0.61083
YGL036W		8.57	9.24	9.1	9.56	0.672124	0.4819	0.19022
YGL037C	PNC1	12.06	12.15	10.3	9.75	0.086483	-0.56181	0.64829
YGL038C	OCH1	9.84	8.87	9.4	8.56	-0.972129	-0.86949	-0.10264
YGL039W		8.41	7.64	8.8	8.58	-0.76484	-0.25103	-0.51381
YGL040C	HEM2	9.98	9.22	9.7	9.45	-0.751773	-0.23704	-0.51473
YGL041W-A		7.98	8.35	7.4	7.19	0.368765	-0.24149	0.61026
YGL043W	DST1	9.52	9.22	9.3	9.17	-0.294694	-0.14338	-0.15132
YGL044C	RNA15	8.14	8.26	8.3	8.39	0.127866	0.06863	0.05924
YGL045W	RIM8	7.62	8.03	8.4	9.39	0.408185	0.96587	-0.55768
YGL047W	ALG13	7.72	8.25	7.6	8.07	0.530566	0.43311	0.09745
YGL048C	RPT6	10.47	10.46	9.9	9.87	-0.009576	-0.06053	0.05095
YGL049C	TIF4632	9.63	9.31	8.3	8.4	-0.310869	0.15082	-0.46169
YGL050W	TYW3	7.93	7.59	8.2	8.04	-0.344922	-0.14853	-0.19639
YGL051W	MST27	6.74	6.89	7.2	7.16	0.15054	-0.0218	0.17234
YGL054C	ERV14	10.63	10.48	9.4	9.27	-0.154005	-0.16304	0.00904
YGL055W	OLE1	11.85	11.1	10.9	10.1	-0.746954	-0.82124	0.07429
YGL056C	SDS23	9.23	8.99	9.7	9.7	-0.238676	-0.02401	-0.21467
YGL057C	GEP7	7.54	7.59	7.5	7.3	0.051568	-0.21631	0.26788
YGL058W	RAD6	9.23	9.64	8.2	8.25	0.406862	0.08206	0.32481
YGL059W	PKP2	7.22	8.4	8.1	8.5	1.18456	0.39534	0.78922
YGL060W	YBP2	8.09	8.31	8.5	8.63	0.21709	0.10706	0.11003
YGL061C	DUO1	7.24	6.73	7.7	6.83	-0.51701	-0.85935	0.34234
YGL062W	PYC1	11.32	11.62	10.3	11.05	0.298374	0.79569	-0.49731
YGL063W	PUS2	4.96	5.08	7.9	8.41	0.122309	0.5078	-0.38549
YGL064C	MRH4	6.99	7.42	7.7	7.8	0.427021	0.08624	0.34078
YGL065C	ALG2	8.98	8.36	8.6	8.01	-0.617316	-0.58255	-0.03477
YGL066W	SGF73	8.61	8.92	8.4	8.92	0.313164	0.54109	-0.22793
YGL067W	NPY1	8.72	8.79	8.5	8.79	0.07379	0.27747	-0.20368
YGL068W	MNP1	9.45	8.56	8.8	8.01	-0.893558	-0.74313	-0.15043
YGL070C	RPB9	8.63	8.02	8.2	7.91	-0.615553	-0.31801	-0.29755
YGL071W	AFT1	6.8	6.48	8.3	8.67	-0.317487	0.36965	-0.68714
YGL073W	HSF1	8.29	9.25	9.2	10.07	0.961673	0.88832	0.07335
YGL075C	MPS2	6.2	5.65	7.9	7.37	-0.545315	-0.54172	-0.0036
YGL076C	RPL7A	14.5	14.07	13.3	12.77	-0.431178	-0.51542	0.08424
YGL077C	HNM1	11.25	10.22	10.9	10.07	-1.03364	-0.8707	-0.16294
YGL078C	DBP3	9.96	9.33	9.8	9.63	-0.624035	-0.22456	-0.39948
YGL079W	KXD1	7.2	7.57	7.8	7.88	0.371821	0.12563	0.24619
YGL080W	FMP37	8.76	8.64	7.7	7.3	-0.11798	-0.37458	0.2566
YGL081W		6.43	6.18	6.4	6.7	-0.252901	0.29804	-0.55094
YGL082W		8.66	8.59	8.7	8.53	-0.072025	-0.14327	0.07125
YGL083W	SCY1	8.05	6.93	7.6	8.03	-1.12721	0.44969	-1.5769
YGL084C	GUP1	9.62	8.83	9.1	9.16	-0.790609	0.05179	-0.8424
YGL085W	LCL3	5.6	6.38	7.4	7.43	0.783983	-0.01403	0.79801
YGL086W	MAD1	8.52	9.34	8	8.98	0.815459	0.95513	-0.13967
YGL087C	MMS2	8.94	9.18	7.8	7.83	0.239472	0.06223	0.17725
YGL090W	LIF1	5.96	6.51	7.4	7.87	0.548821	0.49872	0.0501
YGL091C	NBP35	8.57	8.66	8.9	8.91	0.088286	-0.03387	0.12215
YGL092W	NUP145	10.23	9.65	10	9.69	-0.58028	-0.35604	-0.22424
YGL093W	SPC105	8.13	8.3	8.8	8.78	0.173733	0.03111	0.14263
YGL094C	PAN2	8.46	7.79	9.1	9.31	-0.675794	0.1879	-0.86369
YGL095C	VPS45	8.72	9.26	8.9	9.09	0.538765	0.21902	0.31974
YGL096W	TOS8	6.08	7.17	7.6	7.81	1.09765	0.22687	0.87078
YGL097W	SRM1	10.11	9.49	9.8	9.24	-0.61474	-0.55072	-0.06402
YGL098W	USE1	7.44	7.55	7.2	7.69	0.104941	0.44314	-0.3382
YGL099W	LSG1	9.78	9.13	9.2	9.07	-0.647719	-0.0981	-0.54962
YGL100W	SEH1	9.46	9.11	9.5	9.08	-0.34804	-0.40715	0.05911
YGL101W		8.27	7.25	8.3	7.74	-1.01886	-0.55519	-0.46368
YGL103W	RPL28	13.97	13.77	13.6	13.04	-0.202393	-0.59693	0.39454
YGL104C	VPS73	7.26	8.39	8	8.2	1.13518	0.16972	0.96546
YGL105W	ARC1	12.28	11.8	10.9	10.32	-0.473578	-0.53563	0.06205
YGL106W	MLC1	10.4	10.04	9.4	8.96	-0.356454	-0.43798	0.08153
YGL107C	RMD9	8.39	8.17	8.4	8.19	-0.212197	-0.17757	-0.03463
YGL108C		7.31	7.82	7.5	6.93	0.511937	-0.60841	1.12034
YGL110C	CUE3	8.01	8.14	8.7	8.75	0.138516	0.01956	0.11896
YGL111W	NSA1	9.17	8.93	9.3	9.15	-0.238316	-0.17597	-0.06234
YGL112C	TAF6	9.23	9.02	9.4	9.18	-0.209273	-0.20048	-0.00879
YGL113W	SLD3	5.9	6.66	8.2	7.96	0.755977	-0.2265	0.98247
YGL114W		8.29	8.7	9.3	9.65	0.40435	0.3452	0.05915
YGL115W	SNF4	9.48	8.53	9.6	9.27	-0.950285	-0.34313	-0.60715
YGL116W	CDC20	8.73	7.16	9.2	8.49	-1.57044	-0.69062	-0.87981
YGL117W		6.38	8.08	7.3	8.62	1.70249	1.36657	0.33592
YGL119W	COQ8	8.48	8.37	8.7	8.64	-0.117988	-0.01551	-0.10248
YGL120C	PRP43	10.49	9.86	10.4	10.14	-0.635036	-0.29253	-0.34251
YGL121C	GPG1	7.81	10.12	7.3	9.05	2.30444	1.75795	0.54649
YGL122C	NAB2	10.08	8.89	9	8.75	-1.19062	-0.26838	-0.92223
YGL123W	RPS2	14.28	13.82	13.5	13.01	-0.460442	-0.45233	-0.00812
YGL124C	MON1	7.48	7.57	8.9	9	0.093991	0.10765	-0.01366
YGL125W	MET13	10.25	8.9	8.4	7.12	-1.35023	-1.25234	-0.09788
YGL126W	SCS3	8.85	9.51	10	9.92	0.662364	-0.05299	0.71536
YGL127C	SOH1	7.64	7.07	6.4	6.47	-0.576957	0.10949	-0.68645
YGL129C	RSM23	8.32	8.21	7.9	7.76	-0.104045	-0.12325	0.01921
YGL130W	CEG1	8.8	8.6	8.9	8.67	-0.197185	-0.17851	-0.01867
YGL131C	SNT2	7.6	8.62	8.1	8.47	1.01885	0.33131	0.68754
YGL133W	ITC1	8.72	8.78	8.9	9.13	0.068171	0.22521	-0.15704
YGL134W	PCL10	5.98	6.64	8.1	8.3	0.663046	0.15173	0.51132
YGL135W	RPL1B	14.55	14.12	14	13.56	-0.426474	-0.46025	0.03377
YGL136C	MRM2	6.15	6.33	7.9	8.1	0.177986	0.25072	-0.07273
YGL137W	SEC27	11.87	11.36	10.6	10.2	-0.513847	-0.44756	-0.06629
YGL139W	FLC3	9.28	8.64	8.7	8.96	-0.635778	0.28377	-0.91954
YGL140C		9.27	8.54	9.2	9.71	-0.726733	0.51447	-1.2412
YGL141W	HUL5	9	9.81	8.7	9.43	0.811052	0.70543	0.10562
YGL142C	GPI10	8.35	8.83	8.5	8.67	0.477709	0.2028	0.27491
YGL143C	MRF1	7.05	7.45	8	7.88	0.404766	-0.10837	0.51314
YGL144C	ROG1	6.8	7.81	8.3	9.14	1.00496	0.79806	0.2069
YGL145W	TIP20	8.59	8.56	8.8	8.83	-0.033549	0.00022	-0.03377
YGL146C	RRT6	4.6	5.88	6.5	6.53	1.27887	-0.01795	1.29682
YGL147C	RPL9A	13.84	13.03	12.7	12.04	-0.810951	-0.67258	-0.13837
YGL148W	ARO2	11.61	11.67	10.9	10.54	0.05315	-0.32281	0.37596
YGL150C	INO80	9.67	9.96	9.4	9.89	0.28805	0.45556	-0.16751
YGL151W	NUT1	9.26	9.19	9.2	9.59	-0.066703	0.42259	-0.48929
YGL153W	PEX14	8.15	7.96	8.2	7.84	-0.195788	-0.34121	0.14542
YGL154C	LYS5	6.64	8.18	7.1	8.12	1.5427	0.9787	0.564
YGL155W	CDC43	7.81	7.25	8.8	8.76	-0.565644	-0.07925	-0.48639
YGL156W	AMS1	9.53	10.3	7.8	9.55	0.772115	1.73158	-0.95946
YGL157W	ARI1	10.08	10.67	9.1	9.41	0.59335	0.32579	0.26756
YGL158W	RCK1	4.19	4.05	4.5	5.01	-0.13918	0.55479	-0.69397
YGL159W		7.67	8.14	8	8.2	0.468912	0.21753	0.25139
YGL160W	AIM14	8.82	9	8.6	8.9	0.184609	0.25195	-0.06734
YGL161C	YIP5	8.8	9	9.2	9.36	0.19268	0.20176	-0.00908
YGL162W	SUT1	6.09	6.2	6.5	6.36	0.106975	-0.10705	0.21402
YGL163C	RAD54	8.15	8.27	8.9	9.24	0.126089	0.31777	-0.19168
YGL164C	YRB30	8.03	7.94	7.6	7.61	-0.087407	-0.02978	-0.05763
YGL166W	CUP2	8.44	8.58	8.9	8.75	0.138732	-0.09908	0.23781
YGL167C	PMR1	10.52	8.59	9.8	10.19	-1.92555	0.38161	-2.30716
YGL170C	SPO74	5.11	4.68	5.6	4.25	-0.435383	-1.36505	0.92967
YGL171W	ROK1	9.31	8.74	9.1	8.67	-0.574567	-0.42264	-0.15193
YGL172W	NUP49	9.19	9	9.6	9.45	-0.189786	-0.12369	-0.06609
YGL173C	KEM1	11.5	9.67	10.6	11.04	-1.82338	0.4591	-2.28248
YGL174W	BUD13	6.91	6.37	7.3	7.04	-0.537357	-0.25998	-0.27738
YGL175C	SAE2	5.96	6.17	5.3	5.28	0.206985	0.00358	0.20341
YGL176C		5.92	6.01	7.7	7.77	0.092472	0.03367	0.05881
YGL178W	MPT5	9.01	9.78	8	8.76	0.760837	0.73112	0.02971
YGL179C	TOS3	6.91	6.58	7.5	7.13	-0.325602	-0.39279	0.06719
YGL180W	ATG1	7.42	7.39	6.2	7.05	-0.03154	0.81739	-0.84893
YGL181W	GTS1	8.97	9.01	9	8.97	0.043833	-0.06344	0.10727
YGL183C	MND1	3.11	4.05	4.9	4.74	0.93703	-0.1225	1.05953
YGL184C	STR3	6.6	6.51	5.2	5.04	-0.085171	-0.11227	0.0271
YGL186C	TPN1	9.51	9.29	9.8	9.59	-0.220937	-0.16684	-0.0541
YGL187C	COX4	9.63	9.57	8.4	8.24	-0.057107	-0.19404	0.13693
YGL189C	RPS26A	13.53	13.62	12.1	11.9	0.087632	-0.23151	0.31914
YGL190C	CDC55	9.29	8.43	9.3	9.16	-0.862621	-0.12114	-0.74148
YGL191W	COX13	10.04	10.24	8.9	8.72	0.199994	-0.23179	0.43178
YGL193C		2.11	5.64	6.6	7	3.52393	0.36346	3.16047
YGL194C-A		6.6	6.31	7	6.48	-0.288399	-0.49766	0.20926
YGL195W	GCN1	13.08	13.34	10.9	11.17	0.252217	0.25127	0.00094
YGL196W	DSD1	8.42	8.38	8.9	8.79	-0.036614	-0.1053	0.06869
YGL197W	MDS3	9.19	7.75	8.8	9.01	-1.43146	0.18728	-1.61874
YGL198W	YIP4	9.04	9.17	9.3	9.34	0.133616	0.08145	0.05217
YGL200C	EMP24	11.02	10.57	9.9	9.08	-0.449396	-0.86576	0.41636
YGL201C	MCM6	9.36	8.86	9.5	9.27	-0.501382	-0.20595	-0.29543
YGL202W	ARO8	11.97	11.44	10.7	10.59	-0.527814	-0.07389	-0.45392
YGL203C	KEX1	9.86	9.8	9.1	9.6	-0.056217	0.54197	-0.59819
YGL205W	POX1	3.96	6.31	3.8	5.74	2.34778	1.96913	0.37865
YGL206C	CHC1	13.08	12.72	10.3	10.3	-0.356876	0.03332	-0.3902
YGL207W	SPT16	11.35	10.78	10.2	10.37	-0.577022	0.15921	-0.73624
YGL208W	SIP2	7.97	8.37	8.4	8.3	0.400219	-0.12018	0.5204
YGL209W	MIG2	7.81	8.54	7	7.63	0.729284	0.58594	0.14334
YGL210W	YPT32	8.27	8.1	8.4	8.27	-0.171024	-0.12631	-0.04471
YGL211W	NCS6	7.83	7.82	9.7	9.57	-0.010286	-0.08485	0.07456
YGL212W	VAM7	7.74	7.65	7.8	7.69	-0.08678	-0.12498	0.0382
YGL213C	SKI8	9.08	8.39	8.6	8.38	-0.691235	-0.25968	-0.43156
YGL215W	CLG1	8.73	9.44	9.4	10.09	0.703148	0.73237	-0.02923
YGL216W	KIP3	8.53	7.85	8.9	8.64	-0.674366	-0.2779	-0.39647
YGL219C	MDM34	8.49	8.79	8.4	8.78	0.302835	0.38793	-0.0851
YGL220W	FRA2	9.3	9.85	8.8	8.47	0.556507	-0.33112	0.88763
YGL221C	NIF3	10.36	9.89	9.9	9.29	-0.465057	-0.65187	0.18682
YGL222C	EDC1	8.16	7.95	7.1	6.49	-0.203787	-0.62184	0.41805
YGL224C	SDT1	7.5	8.32	7.7	8.29	0.82073	0.55965	0.26108
YGL225W	VRG4	11.59	10.53	10.7	10.05	-1.06261	-0.67844	-0.38417
YGL226C-A	OST5	8.58	8.6	7.5	7.2	0.021719	-0.2698	0.29152
YGL226W	MTC3	6.87	7.5	6.2	6.39	0.632985	0.22482	0.40816
YGL227W	VID30	8.7	9.58	8	8.7	0.87523	0.74934	0.12589
YGL228W	SHE10	10.2	10.47	9.5	9.6	0.261936	0.06639	0.19555
YGL229C	SAP4	6.52	6.6	6.2	7.14	0.079463	0.94361	-0.86414
YGL231C	EMC4	9.1	8.94	8.7	8.27	-0.162031	-0.44451	0.28248
YGL232W	TAN1	9	8.61	8.6	8.15	-0.394962	-0.46279	0.06783
YGL233W	SEC15	8.88	9.07	9.1	9.03	0.192653	-0.09056	0.28321
YGL234W	ADE5,7	12.24	12.14	11.1	11.03	-0.098612	-0.12076	0.02215
YGL236C	MTO1	6.6	7.2	7	7.66	0.603464	0.64147	-0.03801
YGL237C	HAP2	7.5	7.87	7.4	7.92	0.372909	0.57119	-0.19828
YGL238W	CSE1	10.44	10.24	10.3	10.13	-0.207769	-0.16727	-0.0405
YGL240W	DOC1	5.67	7.3	5.1	6.05	1.62233	0.90956	0.71277
YGL241W	KAP114	9.05	8.99	9.1	9.04	-0.057483	-0.02706	-0.03043
YGL242C		9.3	8.83	8.2	7.76	-0.471221	-0.42657	-0.04465
YGL243W	TAD1	6.81	7.14	8.6	8.63	0.327934	0.07909	0.24884
YGL244W	RTF1	9.69	9.43	9.1	9.09	-0.260998	0.03165	-0.29265
YGL245W	GUS1	13.24	12.79	11.6	10.81	-0.455114	-0.79091	0.3358
YGL246C	RAI1	8.56	8.74	9	8.97	0.186075	-0.0228	0.20888
YGL247W	BRR6	6.38	6.8	7.7	7.41	0.426905	-0.27343	0.70033
YGL248W	PDE1	8.63	8.81	9.3	9.46	0.17943	0.17584	0.00359
YGL250W	RMR1	6.41	6.51	6.9	6.88	0.101168	-0.06386	0.16503
YGL251C	HFM1	5.57	6.09	7.5	7.54	0.515954	-0.00883	0.52478
YGL252C	RTG2	9.23	9.61	9.3	9.53	0.375745	0.23112	0.14462
YGL253W	HXK2	13.37	12.84	11.2	10.72	-0.537031	-0.51849	-0.01854
YGL254W	FZF1	7.19	7.47	7.3	7.35	0.274627	0.02458	0.25005
YGL255W	ZRT1	7.9	12.11	9.6	12.34	4.20935	2.76983	1.43952
YGL256W	ADH4	6.45	5.43	9.1	9.29	-1.02195	0.14573	-1.16768
YGL257C	MNT2	7.64	7.45	8.9	8.84	-0.193014	-0.0338	-0.15921
YGL259W	YPS5	4.37	5.4	4.5	4.84	1.02231	0.3458	0.67651
YGL261C	PAU11	1.38	2.05	4.7	5.19	0.671421	0.53285	0.13857
YGL263W	COS12	4.11	-28.56	5.4	0.17	-32.6735	-5.20922	-27.4643
YGR001C		9.54	9.24	8.9	8.72	-0.304463	-0.1892	-0.11526
YGR002C	SWC4	7.88	8.48	8.5	8.42	0.600246	-0.08107	0.68132
YGR003W	CUL3	8.3	8.7	9	9.16	0.39431	0.18618	0.20813
YGR004W	PEX31	7.93	7.8	8	8.04	-0.130795	0.0546	-0.18539
YGR005C	TFG2	8.74	8.92	8.5	8.54	0.174501	0.07474	0.09976
YGR006W	PRP18	6.27	6.78	6.5	6.69	0.516259	0.15797	0.35829
YGR007W	ECT1	8.39	7.92	9.3	9.01	-0.476428	-0.31742	-0.15901
YGR008C	STF2	9.25	9.28	7.9	7.31	0.023489	-0.57216	0.59565
YGR009C	SEC9	9.12	9.22	8.7	9.11	0.105242	0.37908	-0.27384
YGR010W	NMA2	7.19	6.88	7.8	7.77	-0.314576	-0.07199	-0.24258
YGR012W		9.3	8.69	9	8.47	-0.601986	-0.48136	-0.12062
YGR013W	SNU71	7.93	8.4	8.6	8.86	0.471793	0.28011	0.19168
YGR014W	MSB2	11.35	8.43	10	9.39	-2.91825	-0.57476	-2.34349
YGR015C		6.78	6.64	7.5	7.74	-0.136448	0.24138	-0.37783
YGR016W		6.67	6.76	6.8	6.7	0.085638	-0.07033	0.15597
YGR017W		8.78	9.45	8.7	9.11	0.66641	0.45356	0.21285
YGR019W	UGA1	10.33	11.32	9.4	9.85	0.994762	0.47278	0.52198
YGR020C	VMA7	10.2	9.83	9	8.54	-0.366469	-0.50315	0.13668
YGR021W		7.25	7.53	7.5	7.4	0.278952	-0.09477	0.37372
YGR023W	MTL1	7.06	7.75	7.6	8.44	0.695093	0.86361	-0.16852
YGR024C	THG1	7.6	7.23	9	8.97	-0.372113	-0.0418	-0.33031
YGR026W		10.14	10.16	8.5	8.07	0.015565	-0.4107	0.42627
YGR027C	RPS25A	13.24	13.55	12.5	11.95	0.318605	-0.5654	0.884
YGR028W	MSP1	8.03	8.05	8.5	8.61	0.020932	0.15224	-0.13131
YGR029W	ERV1	7.75	7.61	8.2	7.84	-0.142117	-0.3348	0.19268
YGR030C	POP6	7.66	7.09	7.5	7.06	-0.56243	-0.43066	-0.13177
YGR031W		8.22	7.61	9.4	9.28	-0.609177	-0.1642	-0.44497
YGR032W	GSC2	11.82	11.45	10.6	12.11	-0.372217	1.49716	-1.86938
YGR033C	TIM21	8.29	8.18	9	8.58	-0.109468	-0.4493	0.33984
YGR034W	RPL26B	13.2	12.82	12.3	11.66	-0.380729	-0.618	0.23727
YGR035C		4.65	6.13	4	4.42	1.48265	0.37089	1.11175
YGR036C	CAX4	7.32	7.4	7.8	7.68	0.077301	-0.14248	0.21978
YGR037C	ACB1	10.9	10.49	9.5	8.49	-0.41082	-0.98455	0.57373
YGR038W	ORM1	8.66	8.35	8.6	8.47	-0.302867	-0.14766	-0.15521
YGR040W	KSS1	7.75	7.46	9	8.61	-0.291266	-0.38904	0.09778
YGR041W	BUD9	7.78	7.32	9.2	8.76	-0.464984	-0.46777	0.00279
YGR042W		6.5	7.64	7.7	8.04	1.13173	0.28987	0.84186
YGR043C	NQM1	8.56	9.85	7.9	8.55	1.29617	0.68773	0.60843
YGR044C	RME1	8.6	8.65	8.8	8.77	0.053355	-0.07091	0.12426
YGR046W	TAM41	7.43	7.49	8.2	8.31	0.066232	0.13859	-0.07236
YGR047C	TFC4	8.34	8.47	8.8	8.75	0.127881	-0.06078	0.18866
YGR048W	UFD1	8.54	9.42	8.6	9.17	0.877318	0.52258	0.35474
YGR049W	SCM4	8.56	8.25	7.9	7	-0.300897	-0.86024	0.55934
YGR052W	FMP48	8.08	7.61	6.6	6.08	-0.4708	-0.48511	0.01431
YGR053C		5.6	5.96	5.8	5.84	0.359777	-0.0042	0.36397
YGR054W		11.04	10.52	9.3	9.67	-0.516789	0.37544	-0.89223
YGR055W	MUP1	11.45	10.31	10.3	9.96	-1.13429	-0.32652	-0.80777
YGR056W	RSC1	8	8.48	8.4	8.84	0.478035	0.42084	0.0572
YGR057C	LST7	6.4	6.56	7.6	7.97	0.154066	0.3892	-0.23513
YGR058W	PEF1	7.69	7.69	7.4	7.49	-0.004715	0.07094	-0.07565
YGR059W	SPR3	4.11	4.43	5.4	4.48	0.319576	-0.91005	1.22963
YGR060W	ERG25	12.29	13.1	10.8	11.23	0.810929	0.39985	0.41108
YGR061C	ADE6	12.35	11.91	10.9	10.77	-0.434429	-0.14901	-0.28542
YGR062C	COX18	5.98	6.65	8.1	8.04	0.666155	-0.02642	0.69258
YGR063C	SPT4	8.57	8.89	8.1	8.09	0.317293	-0.04733	0.36463
YGR065C	VHT1	7.86	7.17	9.1	8.75	-0.690238	-0.37053	-0.31971
YGR066C		2.38	3.81	4.9	6.09	1.43456	1.18723	0.24733
YGR067C		5	6.89	5.6	6.21	1.88642	0.59948	1.28694
YGR068C	ART5	7.71	7.96	8.7	8.74	0.245942	0.03359	0.21235
YGR070W	ROM1	6.9	8.12	8.9	8.85	1.21971	-0.02778	1.24749
YGR071C		7.13	7.22	8.2	8.15	0.086994	-0.04722	0.13422
YGR072W	UPF3	7.57	7.73	7.9	8	0.1682	0.06941	0.09879
YGR074W	SMD1	7.87	7.74	8.1	7.71	-0.128676	-0.43252	0.30384
YGR075C	PRP38	6.7	6.89	7.1	6.87	0.188826	-0.20974	0.39856
YGR076C	MRPL25	7.16	6.65	6.6	6.15	-0.502271	-0.44517	-0.0571
YGR078C	PAC10	9.36	8.5	8.2	8.15	-0.868202	-0.03022	-0.83798
YGR079W		9.42	9.46	9.7	9.57	0.038795	-0.0891	0.12789
YGR080W	TWF1	9.24	8.85	8.8	8.53	-0.384276	-0.27793	-0.10635
YGR081C	SLX9	8.41	7.93	8.9	8.37	-0.479935	-0.57544	0.0955
YGR082W	TOM20	9.75	8.83	8.3	8.09	-0.920537	-0.18568	-0.73486
YGR083C	GCD2	9.94	9.56	9.8	9.63	-0.373586	-0.17342	-0.20017
YGR085C	RPL11B	13.68	13.22	12.6	12.21	-0.461988	-0.4089	-0.05309
YGR086C	PIL1	12.82	11.9	11	9.71	-0.916518	-1.29986	0.38334
YGR087C	PDC6	6.67	6.83	5.8	5.97	0.154987	0.17387	-0.01889
YGR088W	CTT1	8.5	9.78	8.3	9.12	1.28641	0.85218	0.43423
YGR089W	NNF2	8.52	8.68	8.9	8.93	0.167215	-0.00794	0.17516
YGR090W	UTP22	10.33	9.49	10.2	10.63	-0.842881	0.4085	-1.25138
YGR091W	PRP31	7.22	7.54	8.1	8.04	0.317457	-0.03521	0.35267
YGR092W	DBF2	9.5	9.07	9.5	9.09	-0.428816	-0.45153	0.02271
YGR093W		7.82	7.8	8.5	8.81	-0.022555	0.27288	-0.29544
YGR094W	VAS1	12.87	12.36	11.8	11.56	-0.514472	-0.21581	-0.29867
YGR095C	RRP46	8.48	8.17	8.5	8.17	-0.314341	-0.3457	0.03136
YGR096W	TPC1	5.41	6.28	6	6.63	0.87395	0.61535	0.2586
YGR097W	ASK10	8.91	9.95	8.7	9.23	1.04258	0.55915	0.48343
YGR098C	ESP1	8.37	7.89	8.5	8.52	-0.483593	-0.01447	-0.46913
YGR099W	TEL2	7.69	7.36	9	8.54	-0.328	-0.47511	0.14711
YGR100W	MDR1	8.46	9.12	8.9	9.44	0.662101	0.51105	0.15105
YGR101W	PCP1	8.04	8.44	8.8	8.95	0.395621	0.13381	0.26181
YGR102C		7.66	8.59	7.7	7.61	0.932393	-0.08424	1.01664
YGR103W	NOP7	10.54	9.95	10.2	10.3	-0.585643	0.08979	-0.67543
YGR104C	SRB5	7.89	7.7	8	7.95	-0.19096	-0.09338	-0.09758
YGR105W	VMA21	8.63	8.48	7.6	7.27	-0.151296	-0.28342	0.13212
YGR106C	VOA1	11.23	11.11	10.3	9.77	-0.120772	-0.5382	0.41743
YGR108W	CLB1	9.05	7.78	10.1	8.74	-1.27294	-1.40324	0.1303
YGR109C	CLB6	7.89	4.73	7.4	4.73	-3.16571	-2.63296	-0.53275
YGR110W	CLD1	6.66	7.6	5.7	6.47	0.934798	0.78426	0.15054
YGR111W		9.02	9.39	8.9	8.79	0.371796	-0.08302	0.45482
YGR112W	SHY1	7.62	7.82	7.5	7.5	0.199769	0.02969	0.17008
YGR113W	DAM1	8.06	7.99	8.5	7.82	-0.076587	-0.70771	0.63112
YGR116W	SPT6	10.89	11.24	9.7	9.9	0.352962	0.23856	0.1144
YGR117C		8.89	8.84	8.8	8.98	-0.047672	0.161	-0.20867
YGR118W	RPS23A	13.23	13.02	12.4	12.23	-0.209944	-0.17086	-0.03909
YGR119C	NUP57	9.66	8.88	10.1	9.99	-0.783108	-0.11677	-0.66634
YGR120C	COG2	7.26	7.14	7.9	7.85	-0.122461	-0.02492	-0.09754
YGR121C	MEP1	7.37	7.03	8.1	7.31	-0.340017	-0.74675	0.40674
YGR122W		7.16	7.37	7.6	7.55	0.208188	-0.01618	0.22437
YGR123C	PPT1	9.62	8.82	8.9	8.75	-0.800435	-0.15652	-0.64391
YGR124W	ASN2	12.27	12.2	11.3	11.68	-0.075637	0.33444	-0.41008
YGR125W		9.38	8.86	9.1	9.07	-0.519872	-0.06202	-0.45785
YGR126W		6.41	7.96	5.2	5.63	1.55347	0.43069	1.12277
YGR127W		7.58	8.16	8.1	8.29	0.577957	0.22771	0.35024
YGR128C	UTP8	9.78	9.15	10	9.87	-0.628667	-0.08681	-0.54186
YGR129W	SYF2	6.64	7.02	6.5	6.55	0.385072	0.03034	0.35474
YGR130C		10.22	10.61	8.8	9.18	0.388751	0.35267	0.03608
YGR131W	FHN1	4.88	5.34	6	6.12	0.461807	0.10232	0.35948
YGR132C	PHB1	10.16	9.85	9.3	9.06	-0.313027	-0.20479	-0.10824
YGR133W	PEX4	6.88	7.91	7.1	7.18	1.02789	0.06286	0.96503
YGR134W	CAF130	8.13	8.3	9.1	9.34	0.162379	0.22162	-0.05924
YGR135W	PRE9	10.49	10.72	9.9	10.11	0.23014	0.2196	0.01054
YGR136W	LSB1	10.45	10.47	9.6	9.55	0.016619	-0.01652	0.03314
YGR138C	TPO2	11.14	12.02	10.8	10.95	0.88065	0.19592	0.68473
YGR140W	CBF2	8.4	7.83	8.7	8.12	-0.563651	-0.59319	0.02954
YGR142W	BTN2	9.2	11.36	8.5	9.77	2.15186	1.29764	0.85422
YGR143W	SKN1	8.61	8.28	9.3	9.93	-0.325884	0.59131	-0.91719
YGR144W	THI4	5.96	6.52	6.9	8.01	0.561362	1.1355	-0.57414
YGR145W	ENP2	9.62	9.27	9.3	9.16	-0.35152	-0.10602	-0.2455
[truncated: 3,327 more rows]

## Sheet: Ded1 dependent genes
#YORF	Gene	ΔTE ded1-ts
Q0130		-3.71
YOR116C	RPO31	-3.22
YNR055C	HOL1	-3.17
YOR377W	ATF1	-3.1
YER125W	RSP5	-3.02
YLR342W	FKS1	-2.97
YLL062C	MHT1	-2.87
YKL176C	LST4	-2.78
YDR170C	SEC7	-2.73
YHR103W	SBE22	-2.69
YNR031C	SSK2	-2.67
YDR028C	REG1	-2.61
YEL042W	GDA1	-2.6
YDR293C	SSD1	-2.6
YNL294C	RIM21	-2.5
YML056C	IMD4	-2.43
YBR086C	IST2	-2.42
YMR089C	YTA12	-2.42
YGR014W	MSB2	-2.34
YDR093W	DNF2	-2.32
YGL167C	PMR1	-2.31
YOL004W	SIN3	-2.31
YDL227C	HO	-2.28
YGL173C	KEM1	-2.28
YPR097W		-2.21
YFL034C-A	RPL22B	-2.16
YDR326C	YSP2	-2.15
YLR019W	PSR2	-2.13
YLL061W	MMP1	-2.1
YNL088W	TOP2	-2.09
YPL115C	BEM3	-2.08
YFR040W	SAP155	-2.07
YOL087C		-2.04
YPR159W	KRE6	-2.03
YER091C	MET6	-2.03
YDR335W	MSN5	-2.03
YNL090W	RHO2	-2.03
YKR099W	BAS1	-1.99
YPL116W	HOS3	-1.97
YOR341W	RPA190	-1.94
YDL140C	RPO21	-1.94
YPL203W	TPK2	-1.94
YKR028W	SAP190	-1.91
YBR172C	SMY2	-1.91
YLR403W	SFP1	-1.9
YDR143C	SAN1	-1.88
YGR032W	GSC2	-1.87
YGR270W	YTA7	-1.87
YBL105C	PKC1	-1.85
YLR023C	IZH3	-1.81
YDR404C	RPB7	-1.8
YLR006C	SSK1	-1.78
YBR023C	CHS3	-1.76
YDR011W	SNQ2	-1.76
YNL101W	AVT4	-1.75
YDR266C		-1.72
YCL051W	LRE1	-1.72
YEL050C	RML2	-1.71
YMR054W	STV1	-1.7
YDL058W	USO1	-1.7
YDR381W	YRA1	-1.7
YLR083C	EMP70	-1.69
YER011W	TIR1	-1.69
YPL036W	PMA2	-1.68
YBR218C	PYC2	-1.68
YDR284C	DPP1	-1.67
YLR180W	SAM1	-1.65
YJL130C	URA2	-1.65
YER088C	DOT6	-1.64
YDR359C	EAF1	-1.64
YKR100C	SKG1	-1.64
YGL197W	MDS3	-1.62
YBL017C	PEP1	-1.62
YDR505C	PSP1	-1.62
YBL106C	SRO77	-1.62
YMR166C		-1.62
YIL014W	MNT3	-1.61
YJR110W	YMR1	-1.61
YOR346W	REV1	-1.6
YGL014W	PUF4	-1.58
YGL083W	SCY1	-1.58
YMR006C	PLB2	-1.57
YMR308C	PSE1	-1.57
YDL019C	OSH2	-1.56
YGR245C	SDA1	-1.55
YKL121W	DGR2	-1.54
YGR281W	YOR1	-1.54
YOR172W	YRM1	-1.54
YDR251W	PAM1	-1.53
YHR205W	SCH9	-1.53
YML106W	URA5	-1.53
YNL091W	NST1	-1.51
YDL171C	GLT1	-1.5
YPR138C	MEP3	-1.5
YIL107C	PFK26	-1.5
YML018C		-1.5
YJL212C	OPT1	-1.49
YAR014C	BUD14	-1.48
YGR178C	PBP1	-1.48
YBR192W	RIM2	-1.48
YKL096W	CWP1	-1.47
YNL085W	MKT1	-1.47
YNL287W	SEC21	-1.47
YBR151W	APD1	-1.46
YEL022W	GEA2	-1.46
YOR329C	SCD5	-1.46
YCR084C	TUP1	-1.45
YGR210C		-1.45
YIL090W	ICE2	-1.43
YDR349C	YPS7	-1.43
YDR062W	LCB2	-1.41
YHR086W	NAM8	-1.41
YPL012W	RRP12	-1.41
YBR187W	GDT1	-1.4
YER165W	PAB1	-1.4
YNL112W	DBP2	-1.39
YCL014W	BUD3	-1.38
YML117W	NAB6	-1.38
YKR095W	MLP1	-1.37
YLR224W		-1.37
YJR068W	RFC2	-1.36
YOL084W	PHM7	-1.35
YBL020W	RFT1	-1.35
YDR292C	SRP101	-1.35
YMR305C	SCW10	-1.34
YKL101W	HSL1	-1.33
YDR144C	MKC7	-1.33
YOR090C	PTC5	-1.33
YBR283C	SSH1	-1.33
YMR212C	EFR3	-1.32
YKL068W	NUP100	-1.32
YLR430W	SEN1	-1.32
YLR353W	BUD8	-1.31
YLR096W	KIN2	-1.31
YDR111C	ALT2	-1.3
YBL047C	EDE1	-1.3
YNL201C	PSY2	-1.3
YOR086C	TCB1	-1.3
YLR422W		-1.3
YPR119W	CLB2	-1.29
YJR090C	GRR1	-1.29
YOR227W	HER1	-1.28
YOL045W	PSK2	-1.28
YAL009W	SPO7	-1.28
YGR233C	PHO81	-1.27
YMR010W		-1.27
YGR218W	CRM1	-1.26
YJL101C	GSH1	-1.26
YDL205C	HEM3	-1.26
YER169W	RPH1	-1.26
YBL099W	ATP1	-1.25
YPL085W	SEC16	-1.25
YGR274C	TAF1	-1.25
YGR090W	UTP22	-1.25
YMR273C	ZDS1	-1.25
YBR140C	IRA1	-1.24
YOR127W	RGA1	-1.24
YOR095C	RKI1	-1.24
YGL140C		-1.24
YMR277W	FCP1	-1.22
YJL082W	IML2	-1.22
YKR002W	PAP1	-1.21
YDR180W	SCC2	-1.21
YDR387C		-1.21
YPL023C	MET12	-1.2
YDR502C	SAM2	-1.2
YLR228C	ECM22	-1.19
YMR011W	HXT2	-1.19
YDR217C	RAD9	-1.19
YLR114C	AVL9	-1.18
YOR370C	MRS6	-1.18
YOR360C	PDE2	-1.18
YNL218W	MGS1	-1.17
YER081W	SER3	-1.17
YJR121W	ATP2	-1.16
YPL221W	FLC1	-1.16
YOR140W	SFL1	-1.16
YPL256C	CLN2	-1.15
YGL008C	PMA1	-1.15
YOL020W	TAT2	-1.15
YKR051W		-1.15
YCR065W	HCM1	-1.14
YOR109W	INP53	-1.14
YHR082C	KSP1	-1.14
YOR118W	RTC5	-1.14
YLL057C	JLP1	-1.13
YOR161C	PNS1	-1.13
YMR229C	RRP5	-1.13
YML115C	VAN1	-1.13
YGL016W	KAP122	-1.12
YLR188W	MDL1	-1.12
YDR085C	AFR1	-1.1
YOR326W	MYO2	-1.1
YIL005W	EPS1	-1.09
YIL125W	KGD1	-1.09
YOR119C	RIO1	-1.09
YJL092W	SRS2	-1.09
YOR195W	SLK19	-1.08
YLR410W	VIP1	-1.08
YOR291W	YPK9	-1.08
YBL042C	FUI1	-1.07
YKL004W	AUR1	-1.06
YNL271C	BNI1	-1.06
YFL024C	EPL1	-1.06
YNL243W	SLA2	-1.06
YNL139C	THO2	-1.06
YAL022C	FUN26	-1.05
YLL021W	SPA2	-1.05
YLL010C	PSR1	-1.04
YPR115W	RGC1	-1.04
YML035C	AMD1	-1.03
YGR177C	ATF2	-1.03
YOL103W	ITR2	-1.03
YPL184C	MRN1	-1.03
YHR119W	SET1	-1.03
YML126C	ERG13	-1.02
YMR290C	HAS1	-1.02
YJL080C	SCP160	-1.02
YPR181C	SEC23	-1.02
YOR047C	STD1	-1.02
YFL007W	BLM10	-1.01
YMR238W	DFG5	-1.01
YNL061W	NOP2	-1.01
YBR263W	SHM1	-1.01
YLR425W	TUS1	-1.01
YOR322C	LDB19	-1
YCR057C	PWP2	-1
YLL048C	YBT1	-1
YHR218W		1
YPL088W		1
YMR180C	CTL1	1.01
YOR177C	MPC54	1.01
YJR104C	SOD1	1.01
YLR251W	SYM1	1.02
YGR102C		1.02
YFR055W	IRC7	1.03
YNL332W	THI12	1.03
YBR208C	DUR1,2	1.04
YDR513W	GRX2	1.04
YIL172C	IMA3	1.04
YJL221C	IMA4	1.04
YLR262C-A	TMA7	1.05
YGR146C	ECL1	1.06
YGR206W	MVB12	1.06
YDL157C		1.06
YMR073C	IRC21	1.07
YCR018C	SRD1	1.07
YIL119C	RPI1	1.08
YPL273W	SAM4	1.09
YJR094C	IME1	1.1
YER153C	PET122	1.1
YBR054W	YRO2	1.1
YOR059C		1.1
YLR318W	EST2	1.11
YDR073W	SNF11	1.12
YJR156C	THI11	1.12
YFL058W	THI5	1.12
YPL191C		1.13
YPL095C	EEB1	1.14
YER173W	RAD24	1.14
YPL066W		1.14
YPR082C	DIB1	1.15
YOR205C	GEP3	1.15
YPL058C	PDR12	1.15
YCR097W	HMRA1	1.17
YLR408C	BLS1	1.19
YDR357C	CNL1	1.19
YDR004W	RAD57	1.2
YPL052W	OAZ1	1.21
YPL167C	REV3	1.21
YPL156C	PRM4	1.24
YHR140W		1.24
YLR211C		1.24
YGR070W	ROM1	1.25
YAR050W	FLO1	1.26
YPL219W	PCL8	1.26
YDR249C		1.31
YAL034C	FUN19	1.34
YMR321C		1.34
YCR089W	FIG2	1.35
YJL133C-A		1.35
YPR030W	CSR2	1.39
YDL244W	THI13	1.39
YBR293W	VBA2	1.39
YOR003W	YSP3	1.4
YBL029W		1.41
YAL063C	FLO9	1.42
YFL055W	AGP3	1.46
YIL120W	QDR1	1.48
YBL075C	SSA3	1.48
YIR027C	DAL1	1.49
YHR211W	FLO5	1.53
YKR009C	FOX2	1.54
YOR019W		1.54
YDR403W	DIT1	1.55
YER053C-A		1.55
YIL002W-A		1.55
YPL034W		1.56
YLR375W	STP3	1.58
YNR004W	SWM2	1.61
YKR097W	PCK1	1.65
YDL024C	DIA3	1.66
YNR069C	BSC5	1.68
YHR033W		1.71
YOR100C	CRC1	1.72
YEL030W	ECM10	1.73
YBR107C	IML3	1.74
YLR092W	SUL2	1.75
YDR275W	BSC2	1.79
YER138W-A		1.79
YKL222C		1.85
YBR250W	SPO23	1.87
YDL154W	MSH5	1.91
YMR306W	FKS3	1.93
YJR154W		1.95
YOL164W	BDS1	2.02
YDR218C	SPR28	2.06
YBR019C	GAL10	2.14
YLL056C		2.17
YLR155C	ASP3-1	2.25
YLR157C	ASP3-2	2.25
YLR158C	ASP3-3	2.25
YLR160C	ASP3-4	2.25
YHL016C	DUR3	2.28
YLL060C	GTT2	2.34
YHR021W-A	ECM12	2.4
YBR063C		2.43
YLL055W	YCT1	2.79
YJL043W		2.8
YJL213W		2.81
YEL009C	GCN4	2.94
YGL193C		3.16
YDL239C	ADY3	3.3
YMR018W		3.36
YPR193C	HPA2	3.52
YOL029C		3.66
