# Supplementary material for: Genome-wide analysis of translational efficiency reveals distinct but overlapping functions of yeast DEAD-box RNA helicases Ded1 and eIF4A
Source: HighWire-hosted journal article supplement (doi:10.1101/gr.191601.115), 2015-06-29
Supplement: Supplemental_File_S3.xlsx [file Supplemental_File_S3.xlsx]

## Sheet: tif1-ts_all expression
			AT 30⁰C, Columns B-H								AT 37⁰C, Columns J-O
#YORF	Gene	ribo_WT	ribo_tif1-ts	mrna_WT	mrna_tif1-ts	Δribo tif1-ts	ΔmRNA tif1-ts	ΔTE tif1-ts		ribo_WT	ribo_tif1-ts	mrna_WT	mrna_tif1-ts	Δribo tif1-ts	ΔmRNA tif1-ts	ΔTE tif1-ts
YHR039C	MSC7	8.81	7.9	8.3	8	-0.914605	-0.27218	-0.642427		8.314	7.81	8.3	8.1	-0.50091	-0.19444	-0.306471
YBL027W	RPL19B	12.32	12	11.6	11.1	-0.323317	-0.5633	0.239978		12.172	11.67	11.7	11.1	-0.50343	-0.57229	0.068859
YIL010W	DOT5	7.08	7.2	6.2	5.9	0.122891	-0.26618	0.389072		7.14	7.13	6.5	6.2	-0.01504	-0.33743	0.32239
YHR041C	SRB2	6.34	6.47	6.6	6.9	0.128795	0.2887	-0.159905		6.463	5.87	7.3	6.8	-0.59229	-0.48378	-0.108512
YDR116C	MRPL1	6.6	6.5	6.5	6.5	-0.099899	-0.0619	-0.0379962		6.668	6.19	6.5	6.1	-0.4804	-0.44026	-0.040148
YMR078C	CTF18	6.25	6.19	6.8	6.7	-0.058145	-0.15319	0.0950429		6.394	5.6	7	6.2	-0.79525	-0.72197	-0.07328
YBR198C	TAF5	8.01	7.85	7.9	7.9	-0.157463	0.05992	-0.217382		7.774	7.74	7.6	7.9	-0.02913	0.21393	-0.243058
YKL175W	ZRT3	8.42	8.63	7.8	8.1	0.210382	0.27223	-0.0618444		8.222	8	7.9	7.8	-0.21773	-0.08042	-0.13731
YDR350C	ATP22	4.77	5.12	7.2	7.7	0.354939	0.58269	-0.22775		4.337	5.61	7.3	8	1.274	0.75113	0.522875
YPL095C	EEB1	6.68	6.74	6.9	7.1	0.062994	0.14711	-0.0841136		5.577	6.35	6.7	6.8	0.77015	0.04976	0.720389
YGR036C	CAX4	5.64	6.35	6.1	6.4	0.710909	0.25639	0.454517		6.091	5.95	6.4	6.1	-0.13914	-0.27146	0.132316
YDR512C	EMI1	6.9	6.84	6.2	5.8	-0.052743	-0.43822	0.385477		6.878	7.62	6.3	5.8	0.74238	-0.45381	1.19619
YBR275C	RIF1	7.17	7.23	7.3	7.4	0.062802	0.06923	-0.0064251		6.99	6.66	6.3	7.1	-0.32659	0.79429	-1.12089
YJR118C	ILM1	7.64	6.99	6.6	5.7	-0.653052	-0.85459	0.201534		7.446	6.57	6.4	5.1	-0.88054	-1.32052	0.43998
YBR077C	SLM4	5.93	6.71	6.6	6.9	0.781692	0.28703	0.494661		6.919	7.15	7.2	6.7	0.22772	-0.50958	0.737294
YMR197C	VTI1	7.12	7.21	7.1	7	0.085001	-0.12998	0.214978		7.466	7.87	7.2	7.4	0.40703	0.22498	0.182043
YJL174W	KRE9	8.79	9.31	8.2	8.4	0.514002	0.1585	0.355502		9.231	9.27	8.2	7.9	0.03807	-0.2393	0.277367
YML014W	TRM9	6.6	6.48	6.5	6.3	-0.119285	-0.23669	0.117407		6.31	6.73	7	6.7	0.42315	-0.30383	0.726983
YPR071W		4.32	4.36	5.4	5.4	0.037626	-0.01352	0.0511484		4.623	5.28	5.9	5.6	0.6528	-0.3141	0.9669
YKL210W	UBA1	11.47	10.61	9.6	9.2	-0.859514	-0.40359	-0.455922		11.597	10.7	9.3	8.9	-0.89924	-0.46153	-0.437708
YIR038C	GTT1	7.55	7.84	7.3	6.7	0.28684	-0.61416	0.900996		7.728	8.47	7.3	7.2	0.74263	-0.10816	0.850787
YBR231C	SWC5	5.49	5.71	5.8	6.3	0.219581	0.43781	-0.218231		5.227	5.67	6.5	6.5	0.44278	-0.05224	0.495017
YCR076C		6.01	6.08	6	5.9	0.075383	-0.10853	0.183911		6.455	6.48	6.9	6.1	0.02233	-0.8401	0.862426
YNL336W	COS1	8.97	9.47	8.7	8.9	0.496611	0.25632	0.240294		9.1	9.31	8.5	8.8	0.21364	0.29327	-0.07963
YLL015W	BPT1	8.28	8.41	8	8	0.137845	0.00046	0.13738		7.875	8.1	7.7	8.2	0.22165	0.43596	-0.214317
YNL053W	MSG5	6.07	6.21	6.6	6.9	0.135067	0.33431	-0.19924		6.437	6.26	7.3	7.3	-0.17634	-0.04689	-0.129456
YGL096W	TOS8	4.25	4.74	6	6	0.48384	0.0788	0.405037		4.831	4.93	5.4	4.9	0.09585	-0.51033	0.606182
YKL012W	PRP40	6.28	6.46	7.3	7.4	0.176634	0.10365	0.0729788		6.131	6.33	6.8	7.7	0.20198	0.91209	-0.710116
YPL249C-A	RPL36B	11.64	11.58	10.5	10.1	-0.061301	-0.39062	0.329322		11.389	11.32	10.5	9.8	-0.07011	-0.71265	0.642546
YNL215W	IES2	6.53	5.94	6.4	6.3	-0.58585	-0.12104	-0.464806		5.87	6.37	6.2	6.2	0.50039	0.03708	0.46331
YPR035W	GLN1	11.38	10.73	10.6	10.9	-0.650264	0.35094	-1.0012		10.882	10.76	10.7	11.3	-0.12383	0.63819	-0.762019
YFR037C	RSC8	8.46	8.35	8.7	8.4	-0.10393	-0.30056	0.19663		8.203	7.89	8.6	8.5	-0.312	-0.13555	-0.176449
YBR154C	RPB5	8.46	8.35	8	7.7	-0.117574	-0.25968	0.142109		8.382	8.34	7.9	7.8	-0.03759	-0.05977	0.022182
YEL058W	PCM1	8.8	8.87	8.5	8.9	0.07185	0.42132	-0.34947		8.582	8.25	8.5	8.4	-0.33155	-0.14757	-0.183973
YER153C	PET122	4.34	4.28	5.1	5.1	-0.056783	-0.03537	-0.0214154		4.164	5.21	5.7	5	1.04718	-0.63045	1.67763
YKL096W-A	CWP2	12.98	12.83	10.7	10.2	-0.149355	-0.47132	0.32196		13.476	12.99	11.4	10.5	-0.4848	-0.89655	0.411742
YDR071C	PAA1	8.86	8.68	8.3	7.6	-0.174729	-0.66954	0.494809		8.752	8.25	8	7.4	-0.50566	-0.60609	0.100431
YDR475C	JIP4	5.99	6.48	7.6	7.7	0.492206	0.10174	0.390466		6.195	6.97	7.6	7.8	0.7758	0.1087	0.667104
YOR159C	SME1	6.06	6.08	5.1	5	0.020115	-0.10052	0.120637		5.918	6.22	4.8	4.4	0.30312	-0.42174	0.724854
YML050W	AIM32	4.06	4.72	5.2	4.6	0.661293	-0.56387	1.22516		5.195	5.17	4.7	5	-0.02531	0.27504	-0.300347
YDL095W	PMT1	10.57	10.3	9.4	9.2	-0.277427	-0.29743	0.019998		10.523	8.94	9.3	8.5	-1.58076	-0.82928	-0.75148
YPR170W-B		8.4	8.29	7.8	7.5	-0.105156	-0.36562	0.260466		8.488	8.37	8.1	7.4	-0.11544	-0.74283	0.627391
YJR091C	JSN1	7.81	8.4	7.7	7.8	0.590015	0.12819	0.461825		8.151	8.73	7.3	7.6	0.58206	0.2825	0.29956
YDL194W	SNF3	3.78	4.51	5.4	5.8	0.7263	0.41743	0.308866		3.964	4.41	5.6	5.4	0.44649	-0.23744	0.683936
YLR259C	HSP60	11.85	10.58	9.5	8.8	-1.27175	-0.76545	-0.506302		12.763	11.2	10	9	-1.55847	-0.96962	-0.58885
YDR372C	VPS74	8.13	7.87	8	7.7	-0.256714	-0.2485	-0.0082182		7.977	7.67	7.3	7.2	-0.30562	-0.09512	-0.210497
YOR058C	ASE1	6.65	7.08	7.1	7.4	0.429454	0.30166	0.127795		7.151	6.83	6.1	6.6	-0.32021	0.51522	-0.835424
YDR170C	SEC7	10.42	9.83	9	8.9	-0.588158	-0.15376	-0.434397		9.847	9.13	8.6	8.5	-0.71745	-0.02328	-0.694163
YER052C	HOM3	8.86	8.56	8.1	8.2	-0.298863	0.07849	-0.377356		8.831	8.32	8.2	8.2	-0.51576	-0.00868	-0.507088
YDR017C	KCS1	7.36	7.26	7.9	8	-0.105337	0.13352	-0.238855		7.157	6.85	7.4	7.1	-0.30866	-0.34753	0.038872
YOL034W	SMC5	5.78	6.01	6.7	6.8	0.230183	0.08969	0.14049		5.542	5.86	5.5	6.6	0.31558	1.12204	-0.806459
YGR216C	GPI1	6.15	6.01	7.1	7.3	-0.139237	0.24799	-0.387225		6.054	5.88	7.1	6.7	-0.17554	-0.32464	0.149099
YLR287C-A	RPS30A	10.91	10.73	9.8	9.3	-0.171741	-0.51172	0.339978		10.627	10.71	9.7	9	0.08664	-0.67973	0.766369
YJR019C	TES1	6.04	6.37	5.6	6.1	0.327905	0.4373	-0.109391		6.218	6.98	5.7	5.8	0.76494	0.16745	0.597492
YBR132C	AGP2	7.19	6.72	5.9	6	-0.46467	0.09127	-0.55594		6.849	7.45	5.1	5.8	0.60358	0.68242	-0.078847
YLR097C	HRT3	5.31	4.5	6.7	6.4	-0.806005	-0.26288	-0.543124		5.458	5.55	6.5	6.6	0.08797	0.0382	0.049766
YCR054C	CTR86	6.74	6.72	6.4	7	-0.021448	0.60089	-0.622335		6.978	7.11	6.7	6.9	0.13141	0.20256	-0.071148
YBR011C	IPP1	12.06	11.94	9.9	9.4	-0.121388	-0.47211	0.350725		12.066	11.78	10	9.2	-0.28699	-0.76142	0.474425
YNL152W	INN1	5.33	5.51	5.8	6.2	0.178247	0.35398	-0.175733		5.783	5.36	5.8	5.8	-0.41903	0.04274	-0.461761
YPR134W	MSS18	4.74	4.78	5.3	5.1	0.034622	-0.22339	0.25801		5.272	5.29	6	5.5	0.02113	-0.49484	0.515969
YNL314W	DAL82	4.21	4.23	5.2	5.5	0.017951	0.30134	-0.283387		5.267	5.24	5.7	5.9	-0.0309	0.20397	-0.234867
YFR015C	GSY1	7.03	6.98	7.7	7.3	-0.048793	-0.43214	0.383346		6.459	5.04	6.4	4.6	-1.41833	-1.74077	0.322447
YPL158C	AIM44	7.51	7.27	7.7	6.8	-0.241899	-0.90824	0.666339		7.726	7.65	7.8	7.2	-0.07151	-0.63514	0.563627
YNL273W	TOF1	6.79	6.49	6.8	7	-0.299374	0.234	-0.53337		6.019	5.82	6.4	6.6	-0.20127	0.27415	-0.475422
YNL071W	LAT1	10.75	10.82	10	9.7	0.070735	-0.27491	0.345647		10.818	10.48	10	9.4	-0.33969	-0.5997	0.260018
YKR018C		8.8	8.69	8.5	8.3	-0.109021	-0.22115	0.11213		8.723	8.77	8.6	8.6	0.04721	-0.04374	0.090951
YHR138C		5.84	6.07	4.9	5.3	0.229436	0.37042	-0.140985		6.611	6.96	5.1	4.8	0.34777	-0.37042	0.718185
YNL116W	DMA2	6.97	6.83	6.9	7.2	-0.142407	0.20947	-0.351875		7.503	7.69	7.6	7.8	0.18179	0.14765	0.034142
YGR183C	QCR9	5.54	7.19	6	6.6	1.64367	0.53065	1.11303		6.468	7.56	6.4	6.5	1.09713	0.1263	0.970829
YMR258C		6.82	6.87	7.5	7.5	0.045431	-0.06048	0.105907		6.789	7.18	7.4	7.3	0.39034	-0.12169	0.512031
YGL197W	MDS3	7.72	8.51	7.6	8	0.791576	0.42503	0.366549		7.829	8.14	7.4	7.8	0.31233	0.43795	-0.125623
YFR051C	RET2	9.44	9.43	8.6	8.3	-0.012173	-0.30917	0.297		9.406	9.03	8.4	8.2	-0.37775	-0.23434	-0.143406
YLR295C	ATP14	7.82	8.67	7.2	7.6	0.857459	0.37982	0.477635		7.537	8.32	7.5	7.6	0.78006	0.07213	0.707929
YOL117W	RRI2	5.03	5.08	6.4	6.3	0.056937	-0.04298	0.0999181		5.804	5.85	6.5	6.8	0.0498	0.31231	-0.262516
YDR530C	APA2	5.76	5.02	6.6	7	-0.74633	0.38119	-1.12752		4.392	4.32	6.8	6.9	-0.07148	0.07422	-0.145703
YCR098C	GIT1	1.75	2.48	4.7	5.4	0.731663	0.75182	-0.0201585		2.162	3.79	4.7	5.6	1.62359	0.93207	0.691521
YBR055C	PRP6	6.64	6.98	7.3	7.7	0.345257	0.3251	0.0201548		6.402	6.53	7.1	7.7	0.12675	0.57852	-0.451765
YJL112W	MDV1	6.45	6.21	7.4	7.6	-0.237164	0.27562	-0.512786		6.193	6.41	7.4	7.3	0.2129	-0.12482	0.33772
YBL071W-A	KTI11	5.71	6.13	5.2	5.4	0.426641	0.14751	0.279136		6.653	7.04	6.2	6.3	0.38465	0.08792	0.296728
YIL076W	SEC28	8.95	8.9	8.6	8.3	-0.049513	-0.26772	0.218212		9.007	8.7	8.6	8.5	-0.31104	-0.10889	-0.202159
YCR023C		6.21	6.24	7.5	7.3	0.030443	-0.17568	0.206127		6.455	5.75	7.6	7.1	-0.7049	-0.57458	-0.130319
YIL001W		5.54	5.79	6.5	6.4	0.247309	-0.09683	0.344141		5.966	6.2	6.7	7	0.23634	0.32907	-0.092736
YDR006C	SOK1	6.98	7.95	7.5	8	0.971506	0.50211	0.469395		7.108	7.98	7.6	8.2	0.87264	0.61572	0.256913
YMR168C	CEP3	4.77	5.44	6.2	6.5	0.674255	0.27185	0.402408		5.177	5.84	6.2	6.3	0.6604	0.04049	0.619901
YER061C	CEM1	5.64	6.43	6.4	6.7	0.791459	0.2879	0.503561		6.151	7.08	6.8	7.8	0.93058	0.96481	-0.034234
YBR088C	POL30	8.8	8.16	7.8	6.8	-0.643851	-1.0555	0.41165		8.871	7.49	7.6	5.9	-1.37706	-1.61695	0.239889
YGR027C	RPS25A	11.82	11.84	11	10.6	0.024645	-0.37737	0.402012		11.493	11.57	11	10.5	0.07766	-0.47541	0.553071
YDR240C	SNU56	5.35	5.7	6.9	7	0.349037	0.10721	0.241827		5.944	6.19	7	7.3	0.24235	0.28756	-0.045208
YKL047W		6.94	6.88	7	7.3	-0.056901	0.24244	-0.299342		6.546	6.61	7.4	7.3	0.06096	-0.10197	0.16293
YDR107C	TMN2	7.49	7.11	6.7	6.2	-0.378513	-0.43576	0.0572454		7.236	6.32	6.8	5.9	-0.91865	-0.92781	0.009158
YOL142W	RRP40	7.2	7.1	6.9	6.9	-0.099504	0.01192	-0.111422		7.317	7.31	7.4	7.4	-0.00651	0.01246	-0.018978
YKL146W	AVT3	7.48	7.51	7.6	7.9	0.031529	0.27906	-0.247532		7.607	7.1	7.7	7.8	-0.50449	0.06599	-0.570481
YDR341C		10.69	10.42	9.3	9	-0.274637	-0.25567	-0.0189709		10.559	9.87	9.3	8.7	-0.68673	-0.57272	-0.11401
YPL189C-A	COA2	5.77	7.32	5.3	6.2	1.54305	0.94078	0.602275		6.119	8.05	5.3	5.8	1.93193	0.55396	1.37798
YAL009W	SPO7	4.49	4.1	6.4	5.8	-0.381118	-0.55909	0.177969		4.558	3.7	6.5	6	-0.8577	-0.47253	-0.385179
YJR109C	CPA2	9.77	9.57	8.2	8.9	-0.197533	0.69411	-0.891644		9.366	9.48	8.1	9.1	0.11414	1.00142	-0.887281
YDR503C	LPP1	6.35	5.95	6.2	6.1	-0.396757	-0.13214	-0.264616		6.364	5.24	6.4	6.1	-1.12262	-0.31087	-0.811752
YBR101C	FES1	7.44	7.03	7.2	6.9	-0.41496	-0.28357	-0.131388		8.735	8.18	7.8	7.5	-0.55555	-0.28878	-0.266778
YHR082C	KSP1	8.04	7.88	7.7	7.9	-0.158107	0.21478	-0.372892		7.569	7.76	7.4	7.7	0.19004	0.31274	-0.1227
YNL262W	POL2	8.48	8.32	7.7	7.9	-0.156243	0.23539	-0.391638		7.74	7.43	7.2	7.6	-0.30471	0.31618	-0.620885
YML005W	TRM12	5.82	5.89	6.3	6.6	0.07326	0.36305	-0.289795		5.761	6.14	6.7	6.9	0.3837	0.16959	0.21411
YPR204W		8.62	9.86	11.3	11.6	1.24003	0.29857	0.941458		7.52	9.33	11.4	11.4	1.80937	-0.0463	1.85567
YPR143W	RRP15	6.79	6.7	7	7.1	-0.090272	0.10013	-0.190404		6.456	6.26	6.7	7.3	-0.19243	0.65454	-0.846966
YNL161W	CBK1	7.75	7.95	7.7	7.9	0.198654	0.15633	0.0423222		7.776	7.89	7.7	7.8	0.11651	0.06926	0.04725
YBL050W	SEC17	8.18	7.78	7.8	7.5	-0.399479	-0.31194	-0.0875375		8.238	7.93	7.8	7.9	-0.31001	0.12493	-0.434937
YCR067C	SED4	8.21	8.21	8	8.1	0.005205	0.15104	-0.145831		8.453	7.97	8.1	8.3	-0.48746	0.23885	-0.726317
YLR199C	PBA1	7.04	6.56	6.8	6.6	-0.483791	-0.17771	-0.306081		7.21	7.14	7.3	6.9	-0.07181	-0.39487	0.323056
YLL026W	HSP104	10.96	10.29	9.9	9.4	-0.671587	-0.54191	-0.129677		12.507	11.86	10.5	9.9	-0.64294	-0.59944	-0.043495
YNL327W	EGT2	10.38	10.12	10.3	9.8	-0.266775	-0.46469	0.19792		10.073	10.36	10	9.9	0.2843	-0.12404	0.408339
YER124C	DSE1	9.44	8.87	9.8	9.1	-0.57287	-0.67435	0.10148		9.11	10.21	9.2	10.1	1.1035	0.81655	0.286956
YBR044C	TCM62	6.45	5.55	7	7	-0.906549	-0.01268	-0.893865		5.301	5.61	7.1	6.9	0.30558	-0.20165	0.507237
YGR063C	SPT4	6.29	6.57	6.4	6.3	0.278499	-0.11242	0.390923		6.406	6.86	7.2	6.8	0.45427	-0.43307	0.887346
YGR261C	APL6	8.15	8.1	8.2	8.1	-0.044245	-0.10805	0.063803		8.244	7.65	8	8	-0.59848	-0.04628	-0.552198
YDR143C	SAN1	6.92	7.3	6.8	7	0.374662	0.1715	0.203161		6.605	6.73	6.7	6.6	0.1241	-0.17656	0.30066
YLR284C	ECI1	3.86	4.96	5	5.4	1.10045	0.39793	0.702522		4.931	5.21	5.4	5.4	0.27493	-0.04414	0.319064
YJL222W	VTH2	7.23	7.3	7.8	8.3	0.068662	0.57601	-0.507345		6.493	7.13	7.5	8.4	0.63655	0.8824	-0.245849
YIL045W	PIG2	4.91	5.51	6.1	6.1	0.597629	0.04469	0.552943		5.777	6.46	5.7	6.2	0.6781	0.50535	0.172746
YIL144W	TID3	6.35	6.98	6.5	7	0.628099	0.55543	0.0726724		6.397	7.08	5.6	6.9	0.68012	1.29592	-0.615795
YIL122W	POG1	5.04	5.7	5	6.3	0.660331	1.22125	-0.560916		4.539	5.22	5.2	5.6	0.68166	0.37607	0.305588
YDL185W	VMA1	12.98	12.82	11	10.8	-0.1626	-0.24041	0.077815		12.798	12.44	10.9	10.7	-0.3558	-0.2472	-0.108598
YDL084W	SUB2	11.05	10.64	10.5	9.9	-0.41473	-0.57887	0.16414		10.878	9.93	10.3	9.3	-0.95005	-0.99465	0.0446
YGR207C		7.79	8.14	7.4	7.2	0.34921	-0.27224	0.621451		8.15	8.37	7.6	7.9	0.22391	0.33159	-0.107678
YOR148C	SPP2	4.32	3.95	5.9	6	-0.368888	0.10377	-0.472661		4.863	5.57	5.8	6.6	0.70457	0.73786	-0.033282
YER043C	SAH1	12.92	12.55	10.5	9.9	-0.361769	-0.60056	0.238793		12.054	11.41	9.6	9.2	-0.64675	-0.35537	-0.291381
YMR285C	NGL2	6.33	6.56	7	7.5	0.227008	0.48247	-0.255461		6.459	6.54	7.2	7.2	0.08459	-0.0601	0.144697
YER142C	MAG1	4.58	4.21	5.3	4.6	-0.37372	-0.70086	0.327142		5.003	4.81	5.8	5.4	-0.19364	-0.39929	0.205652
YOR287C	RRP36	5.82	6.04	5.8	5.8	0.217648	0.02973	0.187918		5.581	5.86	4.8	6.3	0.28149	1.46302	-1.18153
YBR123C	TFC1	6.72	6.53	7.1	7.1	-0.186953	-0.05899	-0.127968		6.393	6.51	7	6.6	0.11352	-0.30907	0.422585
YLL004W	ORC3	5.85	6.05	6.8	7	0.200257	0.21444	-0.0141877		6.39	6.13	6.9	6.8	-0.26098	-0.12265	-0.138337
YNL042W	BOP3	4.98	5.39	6	6.3	0.409434	0.32378	0.0856518		5.002	5.69	6.2	6.7	0.68784	0.53473	0.153118
YJL046W	AIM22	5.3	5.37	6.1	6	0.067873	-0.09716	0.165035		5.438	5.49	5.1	5.7	0.05558	0.65113	-0.595545
YML027W	YOX1	6.9	6.29	6.8	5.5	-0.608141	-1.28883	0.680689		7.707	5.31	7.4	4.7	-2.39243	-2.65752	0.265089
YPR024W	YME1	8.04	8.27	8.6	8.5	0.232275	-0.06115	0.293426		7.882	8.1	8.5	8.2	0.22186	-0.34009	0.561959
YKL120W	OAC1	8.77	8.38	7.5	7.2	-0.391822	-0.34419	-0.0476329		8.993	7.57	7.4	7.1	-1.42017	-0.37417	-1.04599
YPR125W	YLH47	7.33	7.42	6.8	6.9	0.084839	0.14451	-0.0596688		7.209	7.08	6.7	6.9	-0.12846	0.16775	-0.296212
YHR129C	ARP1	5.13	4.67	6.4	6.2	-0.459907	-0.19816	-0.26175		4.499	4.63	6.6	6.1	0.12967	-0.4491	0.578766
YHR028C	DAP2	8.52	8.09	8.4	8.4	-0.4273	-0.08342	-0.343877		8.232	7.64	8.3	8.1	-0.58878	-0.21818	-0.370596
YKR009C	FOX2	4.76	5.47	5.4	5.8	0.704834	0.37417	0.330667		4.636	6.3	5.4	6.3	1.66806	0.92153	0.746529
YNL006W	LST8	6.71	6.51	7.1	6.9	-0.20023	-0.13886	-0.0613672		6.961	6.75	7.6	7.7	-0.21022	0.00586	-0.216086
YOL061W	PRS5	9.17	9.06	8.6	8.8	-0.109069	0.18939	-0.298461		8.696	8.19	8.7	8.4	-0.51065	-0.27747	-0.233186
YGR005C	TFG2	7.14	7.02	7	6.9	-0.120308	-0.0786	-0.0417063		6.862	7.14	6.7	6.7	0.27859	0.03218	0.24641
YNL107W	YAF9	6.12	5.24	5.7	5.4	-0.886247	-0.30552	-0.580728		6.042	6	5.8	5.4	-0.04441	-0.44609	0.401674
YGR104C	SRB5	5.9	5.73	6.1	6.1	-0.163293	-0.04692	-0.116371		6.312	6.61	6.3	6.8	0.29478	0.52122	-0.226448
YDR125C	ECM18	4.23	4.7	4.9	5.3	0.46973	0.39925	0.0704783		3.557	4.89	5.4	5.3	1.32944	-0.09919	1.42863
YBR264C	YPT10	5.71	5.96	5.9	5.8	0.243818	-0.06244	0.306256		5.851	6.44	5.6	5.6	0.593	-0.05261	0.64561
YDL149W	ATG9	5.17	5.9	5.8	5.9	0.726314	0.06264	0.663672		5.88	6.35	5.7	6	0.47028	0.27319	0.197092
YBR066C	NRG2	5.5	5.88	6.7	6.3	0.379601	-0.41684	0.796437		6.034	6.82	6.5	6.6	0.78873	0.17738	0.611349
YBR167C	POP7	4.31	4.42	5.8	5	0.109373	-0.72219	0.831558		4.906	4.16	6.2	6.3	-0.74562	0.0535	-0.799126
YML063W	RPS1B	12.82	12.53	12	11.4	-0.28621	-0.58334	0.297134		12.476	11.97	11.7	11	-0.50246	-0.63371	0.131241
YHL044W		4.18	4.97	5	5.4	0.781221	0.34759	0.433635		4.602	5.13	5.3	5.3	0.52918	0.05179	0.477389
YKR081C	RPF2	8.36	8.36	7.4	7.5	-0.001473	0.08704	-0.0885146		7.822	7.71	7.3	7.6	-0.10883	0.35212	-0.46095
YDL019C	OSH2	8.18	7.89	8.2	8.1	-0.289178	-0.10866	-0.180519		7.84	7.78	7.8	7.6	-0.06309	-0.18941	0.126317
YDR398W	UTP5	7.83	7.73	8.1	8.4	-0.099171	0.28274	-0.381911		7.449	7.6	8.5	8.6	0.15323	0.15183	0.001399
YKL135C	APL2	8.02	7.79	7.9	8	-0.225789	0.0494	-0.275188		7.748	7.78	7.9	8	0.03263	0.15364	-0.121014
YPR112C	MRD1	8.12	8.39	7.8	8.4	0.266697	0.52241	-0.255713		7.936	7.97	7.7	8.6	0.03317	0.90459	-0.871418
YDR156W	RPA14	7.19	7.92	6.3	6.7	0.724075	0.36592	0.358158		7.388	7.6	7	7.3	0.2079	0.32624	-0.118337
YER157W	COG3	6.7	7.1	7.6	7.7	0.399641	0.09791	0.301731		7.251	6.73	7.2	7.6	-0.52011	0.35596	-0.876069
YGR155W	CYS4	11.28	10.67	9.9	9.4	-0.611139	-0.50765	-0.103494		10.561	9.69	9.4	8.9	-0.86805	-0.46201	-0.406044
YKL016C	ATP7	8.75	9.32	7.2	7.8	0.568829	0.61106	-0.0422278		8.755	9.06	7.3	7.5	0.30879	0.13787	0.170925
YDR075W	PPH3	6.37	6.1	6.2	6.3	-0.266134	0.11045	-0.376585		6.088	6	5.9	6.4	-0.09032	0.48483	-0.575158
YLR390W	ECM19	5.74	5.84	5.1	4.7	0.095914	-0.34455	0.44046		5.556	5.97	5.2	5	0.41809	-0.17097	0.589058
YOL012C	HTZ1	7.32	6.86	6.5	6	-0.456939	-0.47367	0.0167346		7.201	6.44	6.7	5.3	-0.76024	-1.44527	0.68503
YBR235W		7.08	7.15	7.4	7.4	0.078816	0.01344	0.0653737		6.754	6.56	7.3	7.3	-0.19836	0.01049	-0.208854
YIL137C	TMA108	8.99	8.49	8	8	-0.496925	0.01057	-0.507497		8.753	8.14	7.8	7.9	-0.61279	0.09708	-0.709876
YML054C	CYB2	2.33	4.73	5.6	6.3	2.39949	0.7269	1.6726		4.89	6.13	6.1	6.9	1.23656	0.82667	0.409891
YER030W	CHZ1	7.34	6.85	6.5	5.7	-0.489677	-0.73615	0.246468		7.156	7.05	5.8	5.8	-0.10251	-0.01347	-0.089036
YLR318W	EST2	2.34	4.03	6.6	6.9	1.68279	0.35221	1.33057		2.848	4.59	6.6	7.4	1.74064	0.79506	0.945586
YOL048C	RRT8	5.74	5.87	6.4	6.7	0.133052	0.31443	-0.181377		6.06	6.71	6.9	6.7	0.64525	-0.15924	0.804493
YCR036W	RBK1	6.93	7.33	7.6	7.9	0.396579	0.30497	0.0916049		6.926	7.51	7.8	8.3	0.57978	0.53177	0.048007
YPR156C	TPO3	9.04	9.71	9.2	10.1	0.669606	0.89209	-0.22248		9.275	9.15	9.6	9.7	-0.12842	0.1857	-0.314121
YDR354W	TRP4	7.23	7.51	7.6	7.5	0.286	-0.1298	0.415797		7.107	7.03	7.9	7.3	-0.07536	-0.60085	0.525484
YPL091W	GLR1	9.74	9.02	8.7	8.3	-0.718919	-0.46157	-0.25735		9.447	8.99	8.7	8.2	-0.45271	-0.47308	0.02037
YGR111W		7.45	7.16	7.6	7.3	-0.289511	-0.33813	0.0486192		7.715	7.73	7.8	7.5	0.01151	-0.28801	0.299522
YOR238W		6.22	5.56	6.2	6.3	-0.661412	0.05228	-0.713694		6.245	6.66	6.6	7	0.41547	0.42611	-0.010643
YJL170C	ASG7	6.37	4.71	6.1	5.2	-1.66492	-0.84608	-0.81884		6.472	5.92	6.9	6.1	-0.5565	-0.79244	0.235939
YGR230W	BNS1	5.38	5.93	5.2	6	0.556971	0.76375	-0.206775		5.787	6.2	6.4	5.5	0.41689	-0.85844	1.27533
YPR075C	OPY2	7.32	7.46	7.3	7.7	0.138199	0.41541	-0.277211		7.432	7.43	7.8	7.9	-0.00296	0.07915	-0.082109
YGR032W	GSC2	8	9.15	7.7	8.7	1.15379	0.93359	0.220194		9.71	9.06	8.7	8.6	-0.65032	-0.05664	-0.593684
YNL255C	GIS2	9.72	9.85	8.3	8.4	0.133634	0.10276	0.0308709		9.291	9.65	8	7.9	0.36342	-0.03334	0.396759
YKL214C	YRA2	5.8	6.42	5.5	5.5	0.627406	-0.07807	0.705474		6.236	6.18	5.8	5.4	-0.05811	-0.40484	0.346731
YDR031W	MIC14	5.15	5.14	5.2	4.9	-0.014186	-0.29115	0.276963		6.005	6.17	5.7	5.4	0.16403	-0.23044	0.394471
YBR114W	RAD16	5.87	6.05	6.7	7	0.184627	0.2492	-0.0645748		6.119	6.33	6.8	7.5	0.20817	0.7198	-0.511626
YBR271W		6.06	6.12	6.6	6.6	0.056636	-0.00391	0.0605488		5.778	4.63	6.9	7	-1.14529	0.0345	-1.1798
YKL052C	ASK1	5.88	5.98	7.5	7.5	0.097417	0.03271	0.0647077		5.937	6.19	7.6	7.6	0.25489	-0.03954	0.294437
YOR191W	ULS1	7.17	7.53	7.4	7.7	0.3561	0.25714	0.0989596		6.846	7.37	6.9	7.7	0.52585	0.76948	-0.243626
YBR073W	RDH54	7.67	8.24	8.3	8.6	0.571377	0.29997	0.271411		7.817	7.98	8.3	8.3	0.16591	0.05154	0.114371
YMR193W	MRPL24	6.33	5.32	6.6	6.3	-1.00879	-0.28707	-0.721715		6.359	6.2	6.6	6.6	-0.15968	-0.02678	-0.132902
YHR196W	UTP9	7.78	7.91	8.4	8.7	0.132065	0.35672	-0.224655		7.681	7.62	7.4	8.7	-0.06141	1.34635	-1.40776
YGR199W	PMT6	7.85	7.79	8.1	7.8	-0.058674	-0.31772	0.259049		8.188	7.78	8.1	7.8	-0.40609	-0.2322	-0.173896
YLR306W	UBC12	4.43	4.67	5.6	5.6	0.240627	0.01519	0.225432		4.503	4.55	6.2	6.2	0.04354	-0.03626	0.079802
YDR299W	BFR2	7.72	7.49	7.4	7.6	-0.228662	0.1912	-0.419864		7.34	7.1	6.8	7.7	-0.24449	0.88354	-1.12803
YDL239C	ADY3	0.18	2.75	5.6	6	2.56858	0.43145	2.13713		1.225	1.04	4.9	6.1	-0.18393	1.1839	-1.36783
YPL118W	MRP51	7.48	7.45	7.6	7.5	-0.025085	-0.11451	0.0894259		7.258	7.07	7.6	7.6	-0.19044	-0.0062	-0.184235
YGL193C		-0.81	1.29	5.4	5.7	2.09851	0.30585	1.79266		-1.947	2.05	5.6	5.8	3.99257	0.19316	3.7994
YJR059W	PTK2	8.11	8.28	8.1	8.1	0.167194	0.06266	0.104529		8.191	7.97	7.5	7.7	-0.22291	0.18386	-0.406768
YDR057W	YOS9	6.98	6.77	6.8	6.6	-0.205545	-0.13597	-0.0695753		7.167	7.25	6.1	6.4	0.08295	0.3494	-0.266452
YPR013C		4.81	4.96	5.5	5.7	0.148363	0.11823	0.0301354		3.347	4.04	5.8	5.7	0.69656	-0.06563	0.762192
YGR256W	GND2	4.58	4.98	4.4	4.8	0.405246	0.40396	0.0012859		6.143	6.95	5.9	6.1	0.80673	0.25039	0.556336
YNL031C	HHT2	11.11	10.55	10.3	9.6	-0.567362	-0.65437	0.0870091		11.042	9.9	10.3	8.9	-1.13721	-1.46758	0.330376
YBR217W	ATG12	3.32	3.62	5.1	5.3	0.299	0.16225	0.136745		4.238	4.1	5.6	5.4	-0.13682	-0.20068	0.063863
YJL116C	NCA3	4.66	7.41	4	6.7	2.74994	2.73944	0.0104958		6.356	9.13	6.3	8.3	2.77511	2.05404	0.721071
YER131W	RPS26B	11.07	10.84	9.7	9.2	-0.224079	-0.47029	0.246208		10.605	10.42	9.1	8.8	-0.1874	-0.36628	0.178886
YLR219W	MSC3	7.21	7.5	7.2	7.6	0.28592	0.4381	-0.152176		7.458	7.79	7.6	7.8	0.32987	0.11588	0.213989
YDR332W	IRC3	4.21	4.37	6.4	6.4	0.166242	-0.01139	0.177636		4.229	4.89	6.4	6.7	0.66042	0.23991	0.420509
YPR174C		5.43	5.69	5.7	6.2	0.267619	0.44044	-0.172817		5.503	5.13	5.3	5.9	-0.37231	0.57389	-0.946202
YIL151C		6.16	6.88	7.8	8.5	0.718554	0.64237	0.0761869		5.718	6.8	7.7	8	1.08416	0.31985	0.764311
YOR018W	ROD1	6.74	7.03	7	6.9	0.290056	-0.10671	0.396769		6.458	7.24	6.6	6.6	0.78688	0.00138	0.785498
YMR139W	RIM11	6.38	6.48	7.1	6.9	0.107772	-0.18603	0.293806		6.884	7.11	6.9	7	0.22496	0.07012	0.154844
YER012W	PRE1	8.5	8.11	7.7	7.2	-0.38353	-0.4551	0.0715696		8.434	8.24	7.1	6.3	-0.19475	-0.88806	0.69331
YGR010W	NMA2	5.74	5.98	6	6.3	0.244134	0.26942	-0.0252862		5.858	6.07	6.1	6.2	0.2115	0.09387	0.117625
YFR055W	IRC7	6.36	6.77	7.3	7.8	0.415882	0.48258	-0.0666966		4.362	4.85	7.2	7.3	0.48975	0.1269	0.36285
YLR138W	NHA1	7.55	8.01	8.1	8.4	0.453176	0.34408	0.109091		7.023	7.72	7.2	8.4	0.69377	1.22197	-0.528198
YDR211W	GCD6	8.89	8.76	8.7	8.7	-0.125633	-0.03804	-0.0875892		8.609	8.48	8.3	8.7	-0.12377	0.38581	-0.509588
YJL035C	TAD2	5.03	4.4	5.1	4.6	-0.631839	-0.45014	-0.181702		5.808	5.05	5.3	4.3	-0.7535	-1.00676	0.253255
YML076C	WAR1	5.9	6.09	6.7	7.1	0.190608	0.42493	-0.234325		5.79	6.92	6.8	7	1.12645	0.2814	0.845049
YDR376W	ARH1	6.84	6.85	7.2	7.2	0.010579	-0.00089	0.0114687		7.001	6.51	7.3	7.1	-0.49048	-0.15329	-0.337187
YNL156C	NSG2	6.75	6.97	7.6	7.5	0.221009	-0.104	0.325012		7.298	6.91	7.3	7.3	-0.38593	-0.01585	-0.370084
YNL310C	ZIM17	6.01	6.56	5.7	5.7	0.55554	0.00697	0.548571		6.714	6.72	5.4	5.4	0.00153	0.04181	-0.040283
YDR174W	HMO1	9	8.75	8.7	8.7	-0.247198	-0.02724	-0.219961		8.523	8.75	8.7	8.4	0.23018	-0.31595	0.546132
YGR054W		9.85	9.36	8.1	8.2	-0.481849	0.12719	-0.609037		9.481	9.1	8.2	8.1	-0.37963	-0.0949	-0.284735
YDR013W	PSF1	6.37	5.73	6.2	6.1	-0.637838	-0.0946	-0.543236		5.646	6.29	6.8	6.5	0.64077	-0.27407	0.914848
YML032C	RAD52	6.57	6.08	7.3	7.4	-0.492811	0.08942	-0.582234		6.354	6	7.2	7.3	-0.35584	0.02264	-0.37848
YGR212W	SLI1	4.88	4.63	5.2	5.1	-0.252577	-0.09343	-0.159148		4.615	5.24	5.3	5	0.62118	-0.3068	0.927971
YOL157C	IMA2	3.95	4.22	5	5.7	0.271324	0.67081	-0.399481		4.23	5.69	5.5	5.5	1.46251	0.01299	1.44952
YBR136W	MEC1	6.42	7.15	6.3	7.2	0.73742	0.93093	-0.193507		6.469	7.02	6.4	7.1	0.55615	0.67678	-0.120635
YKR058W	GLG1	3.94	3.66	6.9	6.8	-0.28264	-0.07634	-0.206304		3.556	3.71	5.8	6.1	0.14977	0.29673	-0.146956
YBR253W	SRB6	5.22	5	6	5.9	-0.214936	-0.05708	-0.157853		5.87	5.59	6.4	6	-0.27757	-0.42338	0.145814
YHR178W	STB5	5.3	5.45	6.4	6.5	0.145523	0.08589	0.0596297		5.083	5.54	6.3	6.2	0.45701	-0.07525	0.532254
YDL190C	UFD2	8.66	8.42	7.9	8	-0.236802	0.03492	-0.27172		8.562	8.25	7.7	7.7	-0.31692	0.04414	-0.361061
YIL115C	NUP159	9.15	9.16	8.5	8.6	0.008596	0.12726	-0.118661		9.04	9.05	8	8.4	0.01096	0.38892	-0.377955
YNR019W	ARE2	7.74	7.34	7.7	7.3	-0.403712	-0.33681	-0.066906		8.51	7.65	8.2	7.1	-0.85595	-1.02305	0.1671
YPL239W	YAR1	7.31	7.56	7.3	7.2	0.249717	-0.10858	0.358297		7.482	7.61	7.8	7.8	0.12874	-0.06353	0.192276
YGL038C	OCH1	8.21	7.98	7.9	7.9	-0.229388	0.02767	-0.257062		8.194	8.01	7.7	7.1	-0.18185	-0.60132	0.419465
YDR389W	SAC7	7.04	6.91	7.3	7.1	-0.131385	-0.11249	-0.0188965		7.101	7.05	7	6.8	-0.05237	-0.29	0.23763
YFL028C	CAF16	6.91	7.15	7.1	7	0.240381	-0.10243	0.342808		6.616	6.87	7.3	7	0.25026	-0.30717	0.557436
YDR288W	NSE3	4.81	5.17	6.6	6.8	0.363779	0.18501	0.178771		5.212	6.03	5.8	6.7	0.81472	0.83595	-0.021235
YLR381W	CTF3	4.74	4.98	6.7	6.9	0.23874	0.1882	0.0505374		5.229	4.59	7	6.2	-0.64358	-0.82103	0.177452
YLL022C	HIF1	6.83	6.34	6.7	6.5	-0.489971	-0.23151	-0.258459		6.371	6.11	7	6.4	-0.25971	-0.59053	0.330823
YNL020C	ARK1	5.48	5.97	6	6.9	0.491894	0.92233	-0.430431		6.063	5.6	6.7	7	-0.45973	0.29381	-0.753535
YJR149W		4.76	3.18	5.4	4.9	-1.58089	-0.46098	-1.11991		4.501	3.71	5.3	5	-0.79561	-0.28452	-0.51109
YJR048W	CYC1	6.8	6.19	5.7	5.3	-0.613262	-0.38809	-0.225171		7.423	6.75	6.8	5.9	-0.6714	-0.97461	0.303216
YDR147W	EKI1	6.7	6.44	7.4	7.2	-0.261833	-0.21063	-0.0512033		6.125	6.38	7.5	7.3	0.25935	-0.2162	0.475544
YNL121C	TOM70	9.54	9.2	8.3	8	-0.348725	-0.30947	-0.0392532		9.126	8.25	7.7	7.8	-0.87185	0.15589	-1.02774
YGR166W	KRE11	6.27	6.29	6.4	6.7	0.02109	0.32426	-0.303166		5.996	6.63	6.4	6.7	0.63672	0.32576	0.310958
YCR063W	BUD31	4.14	5.43	4.4	4.7	1.29649	0.35228	0.9442		3.924	4.68	5.2	5.2	0.7573	0.02274	0.734558
YOL003C	PFA4	6.1	6.33	6.6	5.9	0.236132	-0.66313	0.899258		6.289	5.97	6.3	5.7	-0.31587	-0.53045	0.214581
YOL102C	TPT1	6.46	6.33	6.3	6.1	-0.129812	-0.22814	0.0983329		6.283	6.23	6.5	5.9	-0.05427	-0.55231	0.49804
YAL049C	AIM2	7.13	7.38	7.1	6.9	0.246828	-0.21907	0.4659		7.3	7.7	7.3	6.9	0.39527	-0.41532	0.810588
YMR128W	ECM16	8.49	8.37	7.7	8.1	-0.127007	0.38223	-0.509238		8.043	8.13	7.3	8.3	0.08707	0.96205	-0.874977
YER021W	RPN3	9.38	9.13	9.1	8.9	-0.255488	-0.12265	-0.132838		9.19	8.73	8.8	8.4	-0.45574	-0.33711	-0.118623
YHL026C		4.88	5.37	6.1	6.3	0.492031	0.20114	0.290894		4.102	5.27	6.7	6.5	1.16713	-0.15756	1.32469
YJL125C	GCD14	7.09	6.67	7.4	7.1	-0.414195	-0.25774	-0.156459		6.741	6.45	7.6	7.3	-0.29581	-0.28998	-0.005825
YER120W	SCS2	10.16	9.53	8.4	7.8	-0.628406	-0.54802	-0.0803818		9.971	9.21	8.7	8	-0.76441	-0.67787	-0.086548
YLR208W	SEC13	9.23	9.08	8.2	7.9	-0.147152	-0.29593	0.148777		9.062	8.73	8	7.7	-0.33534	-0.20577	-0.129566
YDR301W	CFT1	7.44	6.99	7	7	-0.443254	0.01313	-0.456382		7.038	6.98	6.6	7.1	-0.05475	0.41884	-0.473589
YJR084W	CSN12	5.65	5.92	6.7	6.8	0.264772	0.06034	0.204428		6.023	6.17	6.9	6.8	0.14362	-0.1486	0.292217
YEL009C	GCN4	5.89	6.33	10.7	11.1	0.443411	0.47463	-0.0312201		5.128	6.47	10.7	11.1	1.34561	0.42696	0.918652
YDR002W	YRB1	10.19	9.92	9.5	8.8	-0.26557	-0.66049	0.394917		9.943	9.73	9.4	8.7	-0.21547	-0.71481	0.499338
YGR023W	MTL1	5.35	6.54	5.7	6.3	1.18939	0.62174	0.56765		5.56	7.11	5.4	5.9	1.54953	0.47635	1.07317
YDR244W	PEX5	6.88	7.05	7.2	7	0.173357	-0.17924	0.3526		7.057	7.1	7.3	7.3	0.0458	-0.0751	0.120893
YOR328W	PDR10	2.97	5.23	6.4	6.9	2.25956	0.52064	1.73892		3.384	6.13	6.9	7	2.74653	0.17165	2.57489
YNL064C	YDJ1	10.83	9.88	9.4	8.5	-0.949616	-0.86514	-0.0844796		11.267	10.17	9.5	8.8	-1.09397	-0.64284	-0.451134
YDR103W	STE5	7.34	7.54	7.3	7.4	0.204709	0.06052	0.144186		7.428	7.81	7.4	8	0.37938	0.54642	-0.167036
YPR147C		6.97	6.93	7.2	7	-0.043035	-0.12544	0.082407		6.876	6.43	7.4	7.1	-0.44066	-0.30357	-0.137093
YGR122W		5.96	5.88	6.1	6.4	-0.079483	0.27208	-0.351564		5.666	6.06	6.3	5.9	0.39036	-0.36332	0.753682
YOR229W	WTM2	6.25	6.72	6.1	6.8	0.466405	0.69082	-0.224416		6.251	5.84	6.9	6.8	-0.41474	-0.07302	-0.341726
YER164W	CHD1	8.25	8.28	7.7	7.8	0.03232	0.15582	-0.123499		8.002	7.59	7.7	7.7	-0.41205	0.02981	-0.441858
YDR406W	PDR15	6.31	6.47	7.3	7.7	0.154509	0.37234	-0.217827		5.721	6.7	7.6	7.7	0.98076	0.05028	0.930478
YBR242W		6.43	6.25	6.6	6.4	-0.174327	-0.13877	-0.0355611		6.929	6.14	7.2	7	-0.78485	-0.13178	-0.653064
YHR076W	PTC7	7.66	6.6	6.8	6.6	-1.05933	-0.26601	-0.793311		7.351	6.65	7.3	6.7	-0.69862	-0.56077	-0.137853
YHR086W	NAM8	7.07	6.94	6.8	6.8	-0.127413	0.00938	-0.136798		6.224	6.51	6.6	6.3	0.28177	-0.23168	0.51345
YPL052W	OAZ1	4.25	5.24	5.5	6.2	0.982383	0.69123	0.291155		3.919	5.39	4.3	6.2	1.474	1.98151	-0.507511
YHR187W	IKI1	6.39	6.46	6.7	6.6	0.069432	-0.09606	0.16549		6.825	6.76	7.4	7.3	-0.06547	-0.087	0.021532
YPL228W	CET1	7.3	7.22	6.9	7	-0.077062	0.12415	-0.201215		7.468	7.41	6.6	6.7	-0.05591	0.16342	-0.219338
YIL104C	SHQ1	5.89	6.56	6.8	7.1	0.663524	0.30292	0.360608		6.065	6.7	6.8	7.1	0.63108	0.31951	0.311562
YNR008W	LRO1	7.6	7.75	6.7	6.5	0.147526	-0.20394	0.351461		7.966	7.64	6.9	6.6	-0.32348	-0.2232	-0.100282
YPR010C-A		5.55	6.47	5.7	6	0.9218	0.36289	0.558909		6.452	7.06	6.2	5.8	0.60418	-0.35025	0.954433
YPL008W	CHL1	5.05	5.89	7	7.2	0.845717	0.23154	0.614178		4.99	5.46	6	7.2	0.47351	1.14502	-0.671516
YBL086C		5.96	6.1	6.6	6.5	0.136148	-0.09076	0.22691		5.745	6.2	6.1	6	0.45513	-0.13539	0.590518
YGR089W	NNF2	7.02	7.08	7.6	7.7	0.055932	0.1087	-0.0527629		7.102	7	7.3	7.1	-0.10383	-0.125	0.021167
YNL002C	RLP7	8.48	8.61	8.3	8.3	0.126438	-0.025	0.151434		8.107	8.07	7.8	8.3	-0.04219	0.41026	-0.452447
YOL065C	INP54	6.13	6.38	6.3	6.1	0.247736	-0.14402	0.39176		6.343	6.61	5.9	6.3	0.26248	0.39823	-0.135749
YGR247W	CPD1	6.11	5.43	6.2	6.1	-0.683796	-0.13507	-0.548729		5.907	6.09	6.1	5.8	0.18421	-0.28193	0.466142
YBL111C		8.03	9.24	9.8	10.2	1.20453	0.47276	0.731778		6.948	8.67	9.8	10	1.71722	0.20711	1.51011
YMR083W	ADH3	10.17	9.96	9.7	9.4	-0.215772	-0.32158	0.105803		10.459	10.64	10.1	10.2	0.183	0.02517	0.157824
YBR163W	EXO5	4.66	5.02	6.6	6.9	0.360032	0.26043	0.0995995		3.499	4.32	6.5	6.4	0.81979	-0.10815	0.927943
YIL063C	YRB2	7.28	6.83	7.1	6.9	-0.444994	-0.21842	-0.226576		7.304	7.16	7	6.9	-0.14371	-0.12934	-0.014371
YHL040C	ARN1	6.78	6.15	7.3	7.5	-0.631554	0.17866	-0.810216		5.334	6.52	7.3	7.9	1.18824	0.58062	0.607615
YJL006C	CTK2	5.51	6.3	6.9	6.8	0.797979	-0.06442	0.862398		6.209	6.41	7.2	7.1	0.20277	-0.03294	0.235718
YLR129W	DIP2	8.27	8.56	8.7	9.1	0.294279	0.39055	-0.0962716		8.103	7.99	8.2	9	-0.11507	0.805	-0.920068
YDR222W		6.97	6.73	6.7	6.3	-0.239505	-0.45857	0.219063		8.258	8.49	7.3	7.3	0.22965	-0.04313	0.272779
YNL244C	SUI1	9.41	8.87	8.7	8.2	-0.54294	-0.45056	-0.0923786		9.124	8.95	8.6	8	-0.1777	-0.61993	0.442227
YPL181W	CTI6	6.31	6.91	7.5	7.6	0.598953	0.09963	0.499318		6.773	7.1	7	7.5	0.32557	0.58618	-0.260601
YOR108W	LEU9	9.05	8.64	8.4	8.2	-0.403494	-0.12713	-0.276361		8.808	7.69	8.5	8.3	-1.11461	-0.20985	-0.904765
YER102W	RPS8B	13.08	13.01	12.8	12.3	-0.06364	-0.52253	0.458888		12.665	12.56	12.8	12.1	-0.10404	-0.67794	0.573895
YGR100W	MDR1	6.72	7.24	7.8	7.9	0.528045	0.08102	0.44703		6.985	7.75	7.8	8.2	0.76335	0.39409	0.369264
YDR121W	DPB4	6.14	5.96	6.2	6	-0.181078	-0.21055	0.02947		6.61	6.35	7.2	6.8	-0.25915	-0.46643	0.207278
YOR009W	TIR4	2.33	4.13	6.3	5.9	1.80088	-0.39211	2.19299		1.042	3.93	6.3	6.4	2.88344	0.07592	2.80753
YDL109C		1.51	4.59	6	6.1	3.08149	0.16114	2.92035		3.062	4.46	6.2	6.4	1.40124	0.10919	1.29205
YHR010W	RPL27A	11.96	11.98	11.2	10.8	0.017715	-0.42862	0.446333		11.679	11.6	10.9	10.5	-0.08165	-0.42983	0.348185
YGR203W	YCH1	5.48	5.49	5.3	5.4	0.016674	0.17152	-0.154849		5.261	5.55	5.6	5.2	0.28481	-0.41827	0.703078
YKL025C	PAN3	7.76	7.39	6.8	6.9	-0.373566	0.02629	-0.399852		7.501	7.32	7.1	7	-0.18337	-0.1503	-0.033077
YML023C	NSE5	4.83	4.66	7.3	7.2	-0.16711	-0.08887	-0.0782366		4.471	4.91	7.5	7.6	0.43672	0.08673	0.349991
YDR460W	TFB3	6.19	5.78	6.4	6.4	-0.412713	0.08609	-0.498806		6.003	6.44	6.5	6.5	0.43684	-0.03943	0.47627
YNL200C		6.46	6.81	6.4	6.3	0.35169	-0.10015	0.451839		6.895	7.53	6.8	6.4	0.63442	-0.42908	1.0635
YMR281W	GPI12	6.07	6.2	5.8	5.9	0.126233	0.05421	0.0720221		6.337	6.06	6.1	5.7	-0.28094	-0.38551	0.104566
YER146W	LSM5	7.42	7.44	6.6	6.6	0.023978	-0.03255	0.0565316		7.293	7.09	6.8	6.4	-0.20633	-0.35607	0.149734
YDR165W	TRM82	8.28	8.03	8	8	-0.252692	0.02289	-0.275585		8.045	7.71	7.6	7.8	-0.33378	0.14756	-0.481346
YHR169W	DBP8	7.13	6.95	7.1	7.4	-0.181125	0.20865	-0.389778		7.006	6.89	7.9	7.7	-0.12093	-0.18193	0.061
YOL021C	DIS3	8.33	8.65	8.4	8.5	0.318589	0.12132	0.19727		8.215	8.31	8.4	8.5	0.09897	0.14796	-0.048986
YKR057W	RPS21A	10.76	10.86	9.8	9.6	0.097809	-0.28166	0.379468		10.205	10.25	9.5	8.8	0.04188	-0.65371	0.695593
YOR283W		6.76	7.23	6.9	7	0.469519	0.09256	0.376957		7.092	7.29	7.4	7.3	0.19721	-0.08283	0.280038
YHR068W	DYS1	9.74	9.66	9.2	8.7	-0.08091	-0.52618	0.445273		9.448	8.87	9.1	8.5	-0.57506	-0.57286	-0.0022
YIL027C	KRE27	6.91	7.22	7.2	6.7	0.309237	-0.4906	0.799841		7.444	7.37	7	6.4	-0.06899	-0.57005	0.501065
YDL080C	THI3	4.89	5.3	7.2	7.2	0.410219	0.01871	0.391511		5.292	5.37	7.4	7.1	0.08281	-0.25407	0.336884
YFR022W	ROG3	4.44	5.59	6.9	7.5	1.15262	0.58103	0.571591		5.162	6.09	7.3	7.6	0.92659	0.28525	0.641345
YJL204C	RCY1	7	6.73	6.7	6.7	-0.271304	-0.04788	-0.223421		6.902	6.77	6.1	6.8	-0.12729	0.72803	-0.855326
YPR079W	MRL1	6.59	6.81	6.9	7	0.223519	0.11288	0.110636		6.748	7.27	7.6	7.6	0.52546	0.01338	0.512077
YDR196C	CAB5	6.15	6.56	6.9	6.7	0.414961	-0.25387	0.66883		6.434	7.41	6.7	7.1	0.97118	0.37859	0.592595
YPL015C	HST2	6.59	6.82	7.3	7.6	0.229012	0.29619	-0.0671825		5.884	5.99	7	6.7	0.10743	-0.27744	0.384874
YNL178W	RPS3	13.21	13.17	12.3	12	-0.039525	-0.31488	0.275354		12.896	12.85	12.2	11.6	-0.04897	-0.5134	0.464426
YLR431C	ATG23	3.91	4.44	5.3	5.5	0.52776	0.27891	0.248848		3.795	5.12	4.9	5.6	1.32856	0.64834	0.680216
YJR077C	MIR1	9.96	10.86	8.4	8.9	0.899095	0.57888	0.32022		10.067	10.19	8.4	8.3	0.12622	-0.12717	0.253398
YDL051W	LHP1	8.8	8.51	8.3	8.2	-0.289542	-0.08382	-0.205726		8.684	8.07	8.4	8.3	-0.61883	-0.17273	-0.446098
YIL090W	ICE2	7.18	7.76	7.3	7.6	0.582164	0.33192	0.250242		7.177	7.3	7.3	7.5	0.12496	0.24218	-0.117215
YOR353C	SOG2	5.97	7.09	7.4	7.8	1.11588	0.46884	0.647038		6.533	7.15	7.3	7.7	0.61356	0.42603	0.187537
YHR031C	RRM3	5.03	5.91	6.9	7	0.874284	0.16653	0.707754		6.322	5.84	7.4	7.1	-0.4842	-0.35102	-0.133179
YHR112C		6.62	6.54	6.7	6.8	-0.073099	0.14778	-0.220875		7.448	7.68	7.6	7.3	0.22976	-0.24353	0.473287
YGL171W	ROK1	7.46	7.72	7.2	7.4	0.262382	0.23533	0.0270476		7.489	7.26	7.1	7.4	-0.22789	0.30583	-0.533724
YDL029W	ARP2	9.21	9.12	8.8	8.5	-0.093364	-0.28393	0.190561		9.158	9.04	8.4	8.1	-0.11726	-0.27448	0.157219
YPL253C	VIK1	5.41	5.9	6.5	6.5	0.491673	-0.0694	0.561072		5.722	5.55	5.8	6	-0.17285	0.12558	-0.298437
YMR272C	SCS7	8.95	9.08	7.9	8.2	0.134461	0.34819	-0.213731		8.919	8.53	7.8	7.9	-0.38359	0.12218	-0.505773
YOR115C	TRS33	6.5	6.22	7.2	6.9	-0.282889	-0.36107	0.0781789		6.164	6.13	7.4	7.4	-0.03002	0.00676	-0.036781
YMR117C	SPC24	4.68	4.37	4.9	5.3	-0.304309	0.39692	-0.701228		4.326	4.96	4.7	4.4	0.63773	-0.28603	0.923756
YER078C	ICP55	6.74	6.28	6.7	6.6	-0.456083	-0.11457	-0.341518		5.936	5.76	6.4	5.9	-0.17822	-0.49187	0.313649
YNL295W		4.32	5.28	6.2	6.5	0.964301	0.33445	0.629855		5.059	5.91	6.1	6.4	0.85312	0.26199	0.591129
YML058W	SML1	9.64	9.4	8.4	7.9	-0.24817	-0.4155	0.167331		10.075	9.58	9	7.4	-0.49095	-1.51338	1.02243
YGL016W	KAP122	8.56	8.7	7.9	7.9	0.136499	-0.01451	0.151011		8.45	8.16	7.7	7.4	-0.28794	-0.32795	0.040016
YPR196W		3.8	3.94	5.4	5.9	0.144464	0.55835	-0.413886		3.515	4.7	6.1	6.2	1.18891	0.11586	1.07305
YGL135W	RPL1B	13.13	13.09	12.6	12.1	-0.041176	-0.49452	0.45334		12.893	12.65	12.3	11.5	-0.24082	-0.85389	0.613069
YLR071C	RGR1	7.49	7.85	7.7	7.9	0.350443	0.19623	0.154218		7.661	7.6	7.1	7.7	-0.06354	0.58797	-0.651511
YGR159C	NSR1	9.95	9.69	8.8	9.5	-0.263563	0.68745	-0.951012		8.824	8.01	9.2	9.5	-0.8167	0.28621	-1.10292
YOR270C	VPH1	11.09	10.94	10.4	10.1	-0.153466	-0.30434	0.150878		10.861	10.63	10.2	9.8	-0.22598	-0.34067	0.114687
YLR273C	PIG1	4.4	3.88	5.4	5.9	-0.520001	0.47243	-0.992434		3.448	4.42	5.2	5.7	0.96816	0.535	0.433161
YLR152C		4.53	4.14	6.9	7.2	-0.393518	0.23825	-0.631767		3.797	4.79	6.9	7.1	0.98863	0.22019	0.768435
YOR151C	RPB2	10.1	9.72	9.3	9.4	-0.383481	0.14843	-0.531907		9.804	9.25	8.6	9.1	-0.55343	0.44959	-1.00302
YJR033C	RAV1	7.37	7.49	7.1	7.1	0.113952	0.0665	0.0474526		7.463	7.35	6.9	7.1	-0.11652	0.14465	-0.261164
YGL250W	RMR1	5.15	4.79	4.9	4.7	-0.358635	-0.17265	-0.185987		4.452	5.11	5.6	5.2	0.65384	-0.43837	1.09221
YHR075C	PPE1	5.57	5.41	6.5	6.2	-0.162887	-0.25821	0.0953254		5.396	5.52	6.6	6.8	0.12824	0.20269	-0.074444
YBR239C	ERT1	4.66	5.34	5.4	5.3	0.684986	-0.06159	0.746578		5.148	6.03	5.9	5.9	0.88454	0.03652	0.848021
YHR156C	LIN1	2.89	4.48	5.2	5.1	1.58645	-0.10673	1.69317		4.312	5.54	4.4	6	1.22987	1.59453	-0.364669
YKL139W	CTK1	6.57	6.57	7	7.1	0.000543	0.09787	-0.0973295		6.266	6.61	6.6	7.2	0.34532	0.59366	-0.248339
YPL217C	BMS1	8.7	8.96	8.2	8.5	0.262868	0.29862	-0.035747		8.325	8.42	7.4	8.6	0.09199	1.1436	-1.05161
YMR034C		3.77	3.94	5	5.4	0.176446	0.40999	-0.233544		3.934	4.92	6	5.5	0.9847	-0.44707	1.43178
YLR314C	CDC3	9.39	8.76	8.7	8.3	-0.632546	-0.4803	-0.152246		9.275	8.57	8	8.1	-0.70858	0.05665	-0.765234
YPL172C	COX10	5.37	5.12	5.8	5.8	-0.246802	-0.04429	-0.202515		4.645	4.55	5.3	5.1	-0.09727	-0.23055	0.133286
YDR097C	MSH6	8.09	7.52	7.4	7.4	-0.564199	0.06894	-0.633135		7.626	6.86	6.9	7.3	-0.76717	0.3508	-1.11797
YPL037C	EGD1	10.87	10.89	9.9	9.3	0.014117	-0.53553	0.549645		10.643	10.73	9.7	9	0.09194	-0.69876	0.790703
YDL073W		6.2	6.53	7.7	7.9	0.328842	0.18524	0.143602		5.616	6.39	7	7.6	0.77133	0.59221	0.179121
YKR054C	DYN1	7.41	8	7	7.5	0.588003	0.49718	0.0908204		7.242	7.79	7	7.1	0.55048	0.11921	0.431264
YHR013C	ARD1	8.06	7.84	7	6.5	-0.215088	-0.53986	0.324775		8.041	7.72	7.3	6.7	-0.31624	-0.64144	0.325198
YGL153W	PEX14	6.48	5.96	6	6	-0.527622	0.01403	-0.541656		6.75	6.62	6.2	6	-0.12928	-0.21482	0.085546
YOR216C	RUD3	7.15	6.81	6.7	6.7	-0.344086	-0.01604	-0.328047		7.064	6.62	5.9	6.6	-0.43963	0.759	-1.19863
YJL041W	NSP1	9.47	9.11	7.9	8	-0.364421	0.11326	-0.47768		9.233	8.53	8	8.1	-0.70478	0.11714	-0.821925
YBR091C	TIM12	5.74	5.71	5.3	5.5	-0.033062	0.19221	-0.225275		5.204	5.96	5.4	4.8	0.75262	-0.60368	1.3563
YOR137C	SIA1	3.06	4.97	6.2	6.4	1.91431	0.16565	1.74866		3.966	4.98	6.2	6.2	1.01271	0.00706	1.00565
YMR171C	EAR1	6.89	6.75	7.6	7.8	-0.141938	0.19943	-0.341368		6.996	6.99	7.2	7.3	-0.00754	0.08628	-0.093828
YOR335C	ALA1	11.57	10.97	10	9.8	-0.608754	-0.21433	-0.394419		10.852	10.03	9.9	9.8	-0.82387	-0.1321	-0.691773
YLR170C	APS1	6.92	6.63	6.5	6.5	-0.290721	0.01357	-0.304289		6.455	7.36	6	6.1	0.9015	0.08257	0.818932
YCR028C-A	RIM1	8.85	8.9	7.5	7	0.050204	-0.48598	0.536189		8.951	8.55	7.6	6.6	-0.40462	-1.03955	0.634938
YDR295C	HDA2	6.6	6.57	6.9	7.3	-0.027984	0.40605	-0.434036		7.051	7.16	7.1	7.5	0.10441	0.37469	-0.270287
YPR097W		7.71	7.61	7.8	7.8	-0.09622	-0.03138	-0.0648362		7.684	7.29	6.8	7.8	-0.39774	0.97556	-1.3733
YKR098C	UBP11	4.3	5.05	5.4	6.3	0.757873	0.86267	-0.104794		4.62	4.46	5.2	5.5	-0.1616	0.25887	-0.420479
YGL117W		3.2	4.59	5.1	5.5	1.39033	0.4282	0.962123		4.757	4.32	4.9	5.5	-0.43539	0.60482	-1.04021
YPR178W	PRP4	5.62	5.9	6.8	6.6	0.276093	-0.25358	0.52967		5.463	6.15	6.7	7.1	0.69115	0.35006	0.341093
YEL072W	RMD6	2.52	1.27	5.1	5.7	-1.2475	0.54373	-1.79123		-0.367	3.45	5.4	5.7	3.81787	0.24528	3.5726
YBL031W	SHE1	5.25	5	5.9	5.3	-0.25614	-0.66824	0.412104		5.24	4.47	6	5.2	-0.7749	-0.78298	0.008088
YLR457C	NBP1	3.65	4.4	5.5	5.7	0.749825	0.139	0.610829		3.623	4.16	5.5	5.2	0.53452	-0.28317	0.817699
YDL150W	RPC53	6.86	7.06	7.7	7.8	0.207639	0.06664	0.140998		6.808	6.74	7.8	8	-0.07117	0.18125	-0.252418
YCR090C		7.48	7.29	7.2	6.9	-0.197509	-0.37497	0.177462		7.328	7.23	7.7	7.1	-0.10067	-0.53745	0.436776
YOR371C	GPB1	6.64	7.3	6.2	6.6	0.659002	0.44786	0.211144		6.611	7.15	6.3	7	0.54046	0.68694	-0.146484
YHR057C	CPR2	6.84	7.13	6.9	7	0.294445	0.09379	0.20066		6.282	7.23	6.9	6.9	0.94367	-0.00598	0.949646
YKR010C	TOF2	6.09	6.2	7.1	7	0.114787	-0.10912	0.223907		6.482	6.02	7.1	6.9	-0.46152	-0.1817	-0.279815
YCR018C	SRD1	5.26	4.53	6.3	5	-0.731063	-1.32583	0.594772		6.835	6.26	7.6	6.5	-0.57148	-1.11758	0.5461
YLR215C	CDC123	6.11	6.06	6.1	6.1	-0.052579	-0.08117	0.0285936		6.095	6.2	6.4	6.3	0.10792	-0.04412	0.152035
YMR016C	SOK2	6.83	7.09	6.4	7	0.262257	0.54592	-0.28366		6.574	6.74	6.3	6.2	0.16165	-0.0838	0.24545
YNR051C	BRE5	7.92	7.37	7.5	7.7	-0.549422	0.14571	-0.695129		7.484	6.63	6.8	7.5	-0.85403	0.70837	-1.5624
YMR135C	GID8	6.72	6.79	8.1	8.3	0.068482	0.2076	-0.139113		6.118	6.98	8	8.7	0.86332	0.7287	0.134621
YLR336C	SGD1	7.22	7.21	7.8	7.8	-0.009953	-0.08077	0.0708125		7.574	7.18	7.5	7.7	-0.38873	0.19708	-0.585813
YOL078W	AVO1	5.99	6.41	6.9	7.2	0.419367	0.25338	0.165992		6.077	6.28	6.3	7.1	0.20203	0.81937	-0.617344
YPL026C	SKS1	5.99	7.23	6.1	8	1.23984	1.85418	-0.614338		6.728	7.91	6.6	8.1	1.18309	1.50304	-0.31995
YPL224C	MMT2	5.97	6.16	6.6	6.7	0.189944	0.03811	0.15183		6.072	5.98	6.7	6.8	-0.09352	0.04978	-0.143301
YDR086C	SSS1	8.92	9.03	8.1	7.7	0.118697	-0.41181	0.530505		8.584	8.75	8.3	8.1	0.16141	-0.24011	0.401516
YPL127C	HHO1	8.45	7.66	7.4	6.6	-0.782816	-0.80966	0.0268429		8.113	6.72	7.2	5.4	-1.38977	-1.82001	0.430241
YBR008C	FLR1	-0.81	2.45	7.2	7.5	3.26389	0.29368	2.97021		-0.357	3.04	7.9	7.6	3.39535	-0.28688	3.68223
YBR109C	CMD1	9.11	9.36	8.1	7.7	0.258603	-0.42358	0.682182		9.223	9.46	7.9	7.4	0.23331	-0.49787	0.731178
YIL108W		7.85	8.11	7.2	7.6	0.264614	0.4721	-0.207485		8.008	8.07	7.2	7.4	0.05771	0.20471	-0.147002
YJR088C	EMC2	7.65	7.62	7.6	7.1	-0.024317	-0.47443	0.450114		8.117	7.71	7.4	6.9	-0.40796	-0.45047	0.042506
YIL009W	FAA3	7.46	6.33	7.3	7.3	-1.13448	-0.04242	-1.09206		6.91	7.05	7.5	7.3	0.13646	-0.24539	0.381846
YGL043W	DST1	7.85	7.69	7.3	7.4	-0.15546	0.112	-0.267457		7.99	8.11	7.5	7.7	0.12432	0.21889	-0.094568
YBR080C	SEC18	9.17	8.68	7.9	7.8	-0.490548	-0.04999	-0.440558		9.151	8.48	8.1	7.7	-0.67331	-0.39975	-0.273565
YDR482C	CWC21	4.74	4.61	5.5	5.6	-0.13226	0.09508	-0.227336		5.079	5.77	5.9	6.1	0.69014	0.19293	0.497208
YOR126C	IAH1	6.13	6.22	6	6	0.084883	-0.05612	0.141001		6.11	6.19	6.1	5.8	0.07642	-0.33196	0.408383
YDR248C		5.98	5.96	6.3	5.8	-0.012531	-0.50016	0.487633		6.236	6.39	6.4	6.4	0.14994	0.00064	0.149294
YOR324C	FRT1	5.64	5.62	6.6	6.6	-0.020212	0.02992	-0.0501329		5.563	4.45	6.9	6.3	-1.11122	-0.61124	-0.499983
YLR006C	SSK1	6.27	6.95	7.1	7.2	0.67826	0.14927	0.528986		5.974	7.01	7	7.3	1.03176	0.32976	0.701994
YDR349C	YPS7	6.59	7.83	7.9	8.2	1.23598	0.30784	0.92814		6.886	7.42	8.1	8.3	0.53273	0.21016	0.322564
YER168C	CCA1	7.96	7.53	7.5	7.4	-0.424086	-0.0444	-0.379683		7.617	7.66	7	7.4	0.04828	0.42927	-0.380985
YGL106W	MLC1	8.87	8.43	8	7.6	-0.441109	-0.39716	-0.0439471		8.791	8.68	8.4	8.2	-0.11319	-0.27872	0.165526
YKL182W	FAS1	13.44	12.92	11.2	11.1	-0.520478	-0.15026	-0.370221		12.749	11.24	10.9	10.2	-1.5053	-0.67032	-0.834986
YPR086W	SUA7	7.6	6.6	7.3	7.4	-1.00398	0.0451	-1.04907		7.231	5.95	7.4	7.6	-1.28139	0.17383	-1.45522
YDR284C	DPP1	7.58	7.85	7.7	7.4	0.271946	-0.29926	0.571205		7.637	7.32	7.9	7.2	-0.31556	-0.73425	0.418695
YOR162C	YRR1	5.32	4.77	6.1	6.3	-0.547142	0.1921	-0.739245		4.194	5.51	6.2	6.6	1.31234	0.41801	0.894328
YOR360C	PDE2	6.82	7.23	7.6	8.1	0.411285	0.47743	-0.0661404		7.114	6.34	7.5	8.2	-0.77372	0.75323	-1.52695
YJR044C	VPS55	7.26	7.87	6.4	6.2	0.61755	-0.23288	0.850432		7.677	8.06	6.1	5.6	0.38463	-0.45874	0.84336
YBL020W	RFT1	6.38	6.76	7	6.9	0.382247	-0.0891	0.471352		6.532	5.47	7	6.5	-1.0594	-0.50287	-0.556527
YOR261C	RPN8	8.95	8.52	8.5	8	-0.432832	-0.51222	0.0793912		8.926	8.3	7.1	7.5	-0.62877	0.45607	-1.08484
YDL127W	PCL2	5.8	5.17	6.2	5.4	-0.628262	-0.82216	0.193899		6.755	6.65	6.4	6.8	-0.10118	0.39426	-0.495439
YHR147C	MRPL6	6.66	6.38	6.7	6.5	-0.28119	-0.20195	-0.0792375		6.595	7.11	6.8	6.8	0.51525	-0.01255	0.527797
YGL241W	KAP114	7.28	7.25	7.6	7.4	-0.034159	-0.15917	0.125009		7.376	7.16	7	7.2	-0.2136	0.25386	-0.467452
YHR046C	INM1	6.68	6.16	6.2	6.4	-0.521446	0.18589	-0.707332		6.76	7.03	6.6	6.9	0.27006	0.31171	-0.04165
YLR305C	STT4	8.67	8.79	8.2	8.4	0.127753	0.20295	-0.0751964		8.531	8.43	8.2	8.2	-0.09658	0.01303	-0.109608
YPL163C	SVS1	9.77	8.6	7.9	7.2	-1.17626	-0.7058	-0.470461		9.715	7.82	7.8	6.1	-1.89631	-1.71269	-0.183616
YMR227C	TAF7	6.26	6.17	6.5	6.7	-0.099464	0.20714	-0.306604		6.405	6.4	6.6	7.1	-0.00939	0.4996	-0.50899
YPL206C	PGC1	7.38	7.28	7.5	7.1	-0.097445	-0.39546	0.298011		7.713	8.21	7.6	7.4	0.49758	-0.17209	0.66967
YNR026C	SEC12	7.47	7.44	7	7.2	-0.026073	0.23961	-0.265682		7.281	7.42	7	7.2	0.14156	0.2111	-0.069541
YMR205C	PFK2	12.35	11.7	10.1	10.1	-0.642856	-0.07318	-0.56968		12.577	11.68	10.2	10.2	-0.89345	-0.0395	-0.85395
YPL040C	ISM1	5.83	6.27	6.4	6.5	0.445016	0.09969	0.345329		5.363	5.71	6.4	6	0.34645	-0.38701	0.733464
YGR287C	IMA1	4.17	3.35	5.2	5.4	-0.823017	0.20606	-1.02908		4.316	3.64	5.6	4.9	-0.67854	-0.77864	0.100103
YPL141C	FRK1	7.34	7.92	7.2	7.5	0.576216	0.28491	0.291308		7.39	7.46	6.7	6.4	0.07475	-0.3198	0.394554
YHR165C	PRP8	8.26	8.77	8	8.3	0.517658	0.27083	0.246824		8.029	8.43	7.8	8.1	0.39732	0.31141	0.085919
YDL105W	NSE4	5.12	4.94	5.1	5	-0.175686	-0.11311	-0.0625726		3.991	4.85	5.1	4.9	0.8604	-0.14018	1.00058
YDL004W	ATP16	8.62	9.48	7.4	7.6	0.862438	0.22661	0.635831		8.547	9.23	7.2	7.3	0.68751	0.06711	0.620399
YBL046W	PSY4	6.44	6.4	6.7	6.6	-0.044519	-0.04982	0.005302		6.012	6.29	6.5	6.5	0.27354	-0.01985	0.293397
YEL027W	VMA3	11.68	11.36	10.1	9.3	-0.320947	-0.81855	0.497604		11.549	11.45	9.8	8.9	-0.10411	-0.87501	0.770898
YKR045C		4.43	5.53	4.6	5.1	1.10448	0.54488	0.559593		5.677	6.05	5.1	4.9	0.37761	-0.14439	0.522004
YHR064C	SSZ1	11.55	11.56	10.3	10	0.012866	-0.25929	0.272161		11.325	10.85	10.5	9.9	-0.47175	-0.54762	0.075868
YGL227W	VID30	7.33	7.19	7.1	6.9	-0.142522	-0.15921	0.0166829		7.195	7.73	6.4	6.8	0.53829	0.42815	0.110141
YOR306C	MCH5	0.77	3.96	5.8	6.5	3.1974	0.69721	2.50019		1.646	2.93	6.1	6.7	1.28297	0.59988	0.68309
YLR363C	NMD4	5.65	5.92	6.3	6.1	0.273367	-0.22377	0.49714		6.795	6.57	6.1	6.5	-0.22272	0.36194	-0.58466
YLR262C	YPT6	7.6	7.2	6.6	6.4	-0.396342	-0.2432	-0.153143		7.382	7.25	6	6.2	-0.12875	0.15843	-0.287181
YGR148C	RPL24B	11.62	11.42	10.3	9.9	-0.204303	-0.47463	0.270323		11.287	11.08	10	9.4	-0.208	-0.66412	0.456118
YOR207C	RET1	8.72	8.85	8.4	8.8	0.133759	0.41355	-0.279795		8.669	8.6	8.2	8.9	-0.06506	0.60695	-0.672014
YDR169C	STB3	6.41	6.71	6.5	6.7	0.298908	0.199	0.0999115		6.23	6.74	6.2	6.8	0.5084	0.55064	-0.042244
YPR169W	JIP5	7.11	7.08	8.1	8.3	-0.026776	0.22843	-0.255202		6.43	6.82	7.8	8.2	0.39167	0.43846	-0.046788
YER186C		-0.81	0.85	6.6	6.4	1.65697	-0.16392	1.82089		-1.946	-27.39	6.2	6.6	-25.4423	0.44789	-25.8902
YNL187W	SWT21	1.49	2.84	5.5	5.9	1.35029	0.43445	0.915839		2.384	4.1	6	6.3	1.7193	0.25785	1.46145
YPL004C	LSP1	10.52	10.45	10	9.8	-0.065363	-0.28362	0.218259		10.375	10.8	9.8	9.2	0.42798	-0.60909	1.03707
YGR085C	RPL11B	12.35	12.41	11.1	10.7	0.056807	-0.31809	0.374897		11.888	12.18	10.9	10.5	0.28748	-0.39061	0.678093
YKR089C	TGL4	7.91	8.13	8.4	8.5	0.219686	0.13039	0.0893007		7.99	8.66	8.2	8.8	0.66683	0.56081	0.106021
YPL105C	SYH1	7.55	7.94	8.5	8.7	0.383221	0.16299	0.220235		7.371	7.67	8.4	8.8	0.29667	0.35909	-0.062426
YOR342C		7.21	6.42	7.2	7.3	-0.795993	0.1202	-0.916191		6.656	6.39	7.1	6.9	-0.26851	-0.19634	-0.072163
YDL141W	BPL1	7.9	7.3	7	7	-0.601516	-0.0311	-0.570412		7.484	7.24	7.1	7.1	-0.23958	-0.03616	-0.203418
YDR428C	BNA7	6.4	6.32	6.3	5.7	-0.082718	-0.58124	0.498527		6.631	6.89	6.6	6.5	0.25961	-0.06033	0.319942
YBL002W	HTB2	10.16	9.29	9.5	8.5	-0.869995	-0.9743	0.104308		10.266	7.86	9.8	7.3	-2.40796	-2.49712	0.089164
YOR243C	PUS7	8.5	8.43	8	8.3	-0.075462	0.21768	-0.293144		7.448	7.03	7.4	7.6	-0.41336	0.27758	-0.69094
YDR529C	QCR7	8.26	9.17	7.6	8	0.913649	0.45715	0.456503		8.537	9.27	7.8	7.8	0.73232	0.06338	0.668939
YGL160W	AIM14	7.25	7.39	7.5	7.2	0.147801	-0.29875	0.446555		7.073	7.21	7.3	7.1	0.13531	-0.13336	0.268671
YCR009C	RVS161	8.79	8.54	8.2	7.9	-0.252092	-0.28287	0.0307777		8.824	8.85	7.9	7.4	0.02754	-0.48738	0.514918
YKR100C	SKG1	6.97	7.17	6.9	7.3	0.196992	0.39928	-0.202284		6.569	7.23	6.8	7.3	0.65864	0.48905	0.16959
YJL082W	IML2	7.25	7.89	6.9	7.9	0.647205	1.00636	-0.359155		7.884	8.24	7	7.6	0.35621	0.6675	-0.311292
YKR001C	VPS1	10.19	9.56	8.9	8.5	-0.624082	-0.42916	-0.194924		9.912	9.23	8.5	7.8	-0.68557	-0.63484	-0.050734
YDL206W		4.46	5.05	6.7	6.8	0.589189	0.10036	0.488827		4.49	4.63	5.9	6.3	0.13834	0.38402	-0.245677
YOL069W	NUF2	6.72	6.39	6.2	6.7	-0.322742	0.44269	-0.765427		6.722	6.22	6.6	6.3	-0.49983	-0.29676	-0.203072
YMR106C	YKU80	5.37	5.6	6.2	6.4	0.231255	0.18382	0.0474308		5.518	6.11	6.4	6.6	0.59041	0.19038	0.400032
YLR327C	TMA10	5.43	6.79	3.5	5.7	1.35837	2.28046	-0.922088		7.736	8.14	4.2	5.8	0.40405	1.55293	-1.14888
YLR024C	UBR2	6.69	6.72	6.2	6.7	0.02122	0.5004	-0.479177		6.162	6.36	6	6.5	0.19954	0.58177	-0.38223
YPL242C	IQG1	7.58	8.57	8.4	8.9	0.99162	0.5164	0.475218		7.916	8.02	7.8	8	0.10915	0.20536	-0.096211
YOR005C	DNL4	4.85	5.55	6.2	6.5	0.693184	0.28298	0.410206		5.356	6.31	6.3	6.6	0.9547	0.31625	0.638447
YNL291C	MID1	6.67	6.94	7.2	7.4	0.271063	0.23245	0.0386153		6.554	6.17	7.4	7.2	-0.38601	-0.16825	-0.21776
YNR033W	ABZ1	7.49	6.82	7.6	7.3	-0.666098	-0.30495	-0.361149		7.145	6.64	7.7	7.4	-0.5093	-0.25629	-0.253006
YGL131C	SNT2	5.89	5.92	6.7	7.2	0.025238	0.50584	-0.480597		6.275	6.11	6.4	7.5	-0.16438	1.13978	-1.30416
YPL213W	LEA1	6.22	5.65	6.3	6.5	-0.563466	0.21711	-0.780575		6.266	6.62	7	7.2	0.35018	0.1606	0.189582
YMR030W	RSF1	4.43	5	5	5	0.569239	-0.01285	0.582091		4.85	5.34	4.4	4.9	0.48711	0.57297	-0.085861
YOL139C	CDC33	10.21	10.17	9.3	9	-0.039929	-0.32615	0.286222		9.844	9.67	9.1	8.8	-0.17633	-0.26122	0.084886
YHR071W	PCL5	3.9	3	6.3	6.3	-0.896117	0.01808	-0.914197		3.423	3.62	6.9	7.2	0.20145	0.27829	-0.07684
YEL054C	RPL12A	11.91	11.62	11.2	10.7	-0.287674	-0.46717	0.179499		11.529	11.26	11.4	11.1	-0.26923	-0.30808	0.038846
YHR152W	SPO12	7.48	8.14	7.1	7.4	0.666578	0.29928	0.367297		7.964	8.12	7.4	7.1	0.15902	-0.24786	0.406885
YCL016C	DCC1	6.32	5.79	6.3	6.2	-0.526694	-0.03505	-0.491647		5.481	5.96	7	6.6	0.48194	-0.3559	0.837842
YBR158W	AMN1	7.7	6.73	9.2	8.4	-0.975664	-0.78171	-0.193955		6.797	7.19	9	9.2	0.39592	0.13266	0.26326
YLR075W	RPL10	13.49	13.49	12.8	12.4	-0.004871	-0.38921	0.384335		13.251	13.38	12.6	12	0.12593	-0.67422	0.800148
YOR274W	MOD5	5.6	6.3	5.7	6.6	0.699685	0.87603	-0.176347		6.07	6.7	6.1	6.8	0.62667	0.69679	-0.070121
YLL019C	KNS1	6.96	7.62	7.2	7.9	0.655799	0.70423	-0.0484294		7.05	8.74	7.2	8	1.68547	0.77992	0.905545
YNL219C	ALG9	8.42	8.69	7.6	7.7	0.274811	0.12935	0.14546		8.087	7.81	7.5	7.5	-0.27692	-0.09032	-0.186599
YDL213C	NOP6	7.4	7.58	7.4	7.5	0.176407	0.08345	0.0929562		7.019	7.46	7.7	7.9	0.43786	0.17746	0.260392
YPL132W	COX11	5.27	5.7	6.5	6	0.43537	-0.54461	0.979974		5.648	5.01	6.5	5.5	-0.6354	-1.02774	0.392343
YFL013C	IES1	6.94	7.49	7.1	7.3	0.549305	0.21989	0.329413		6.841	7.35	7.1	7.5	0.50809	0.35082	0.157273
YGL056C	SDS23	8.12	7.93	7.9	8.3	-0.187396	0.45441	-0.641807		8.108	8.37	8.6	8.9	0.26478	0.28265	-0.017866
YCL052C	PBN1	6.87	6.71	7.3	7.3	-0.157318	-0.04988	-0.107434		6.723	7.02	7	7.1	0.29577	0.02436	0.271404
YGR191W	HIP1	8.76	8.75	8.5	8.6	-0.013764	0.10068	-0.114442		8.827	8.81	8.8	8.8	-0.01253	-0.02254	0.010015
YLR435W	TSR2	7.51	6.89	6.5	6.3	-0.620328	-0.25755	-0.362776		6.985	6.85	6.5	6.6	-0.13814	0.09012	-0.228259
YKL179C	COY1	7.39	7.28	7.4	7.7	-0.106524	0.22825	-0.334776		7.361	7.31	6.4	7.7	-0.0557	1.24419	-1.29989
YAL014C	SYN8	5.35	5.76	6.5	6.6	0.409284	0.16682	0.24246		5.909	6.17	6.5	6.1	0.25885	-0.40604	0.664893
YBR279W	PAF1	7.58	7.15	7.4	7.5	-0.427023	0.08089	-0.507913		7.456	7.48	7.1	7.5	0.02664	0.45321	-0.426572
YHR035W		3.48	4.11	5.1	5.2	0.629281	0.16049	0.468789		4.306	3.79	5.1	5.1	-0.51358	-0.01171	-0.501867
YDL055C	PSA1	12.53	11.56	11.4	10.4	-0.967376	-1.03739	0.0700154		12.292	11.15	11	10.3	-1.14318	-0.78932	-0.353862
YBL017C	PEP1	9.65	9.47	8.6	8.6	-0.18287	-0.07027	-0.112599		9.172	8.39	8.5	8.6	-0.78115	0.11286	-0.894011
YIL094C	LYS12	9.18	9.35	8.9	9	0.171102	0.12044	0.0506628		9.504	9.61	9.3	9.3	0.10406	-0.04268	0.14674
YPL257W		3.46	4.3	4.9	5.1	0.8409	0.23175	0.609154		5.068	4.98	4.8	4.9	-0.09128	0.08468	-0.175959
YBR194W	AIM4	4.04	4.81	4.5	4.5	0.764386	-0.01165	0.776033		5.011	4.79	5.1	5.2	-0.22502	0.03629	-0.261308
YOL052C-A	DDR2	6.04	8.89	5.4	6.8	2.84694	1.38269	1.46426		8.453	11.19	7.1	8.5	2.73744	1.44214	1.2953
YMR276W	DSK2	9.71	9.47	8.6	8.2	-0.240565	-0.38234	0.141774		9.828	9.13	8.8	7.9	-0.69788	-0.88369	0.185806
YOR230W	WTM1	10.39	10.33	9.4	9.3	-0.063843	-0.10232	0.0384759		10.781	10.36	9.7	8.9	-0.41637	-0.85786	0.441488
YJL178C	ATG27	8.16	7.8	7.9	7.2	-0.365137	-0.70349	0.338352		8.012	8.07	7.8	7.1	0.05853	-0.73623	0.794762
YML018C		6.38	6.73	7.6	7.9	0.348008	0.31278	0.0352301		6.281	6.52	7.9	7.9	0.23538	0.04658	0.188797
YOR111W		5.17	5.02	5.6	5	-0.144423	-0.68453	0.540107		5.802	5.8	5.5	5.1	-0.00499	-0.34501	0.340021
YMR113W	FOL3	6.52	6.41	6.5	6.6	-0.112774	0.05351	-0.16628		6.349	6.88	7	7	0.53013	-0.0804	0.610534
YDR170W-A		9.26	9.2	6.7	7.4	-0.056635	0.66756	-0.72419		9.091	9.04	6.7	7.5	-0.04872	0.81784	-0.866558
YLR332W	MID2	7.3	8.24	6.7	7.3	0.93329	0.5553	0.377993		8.033	8.65	6.9	7	0.62063	0.03547	0.585162
YPR093C	ASR1	3.97	4.41	5.3	6.2	0.437229	0.97219	-0.534957		4.476	5.63	6.3	7.1	1.15496	0.79506	0.359894
YDR138W	HPR1	7.28	7.38	7.1	7.4	0.104203	0.28851	-0.184305		6.976	6.99	6.7	7.2	0.01521	0.50805	-0.492836
YMR012W	CLU1	11.26	10.43	9.2	9	-0.830066	-0.17801	-0.652055		10.735	9.22	8.2	8.2	-1.51872	-0.00707	-1.51165
YKL197C	PEX1	6.15	6.32	6.4	6.7	0.165385	0.32535	-0.159961		6.687	6.92	6.7	6.9	0.23596	0.20872	0.027238
YBL035C	POL12	7.01	6.76	7.1	7.1	-0.246765	0.05995	-0.306712		6.68	6.32	7	6.8	-0.36445	-0.19327	-0.171176
YHR215W	PHO12	5.64	4.52	6.5	7	-1.12137	0.40628	-1.52765		5.661	4.81	7	6.7	-0.84962	-0.32521	-0.524403
YIR016W		2.53	2.97	7.2	7.6	0.440099	0.42805	0.0120462		0.859	3.16	7.7	7.3	2.29656	-0.40924	2.70579
YPR063C		8.48	8.65	6.9	6.8	0.174619	-0.14365	0.318268		8.518	8.38	7.1	6.7	-0.13461	-0.3751	0.240484
YHR134W	WSS1	4.09	4	5.8	6.1	-0.098956	0.3013	-0.400259		4.359	6.1	6.2	6.2	1.73801	0.02209	1.71592
YDL033C	SLM3	4.59	4.93	5.5	6	0.342364	0.48016	-0.137797		4.949	5.16	6.3	6	0.20772	-0.35915	0.566871
YDR291W	HRQ1	6.02	6.13	7.4	7.5	0.107691	0.10244	0.0052547		5.879	6.34	7	7.3	0.46508	0.27618	0.188899
YER092W	IES5	5.8	6.36	6.3	6.1	0.566806	-0.18611	0.752916		6.276	7.29	6.5	7.1	1.01047	0.59959	0.410877
YGR090W	UTP22	9.27	9.13	8.9	8.9	-0.134032	-0.04532	-0.0887091		8.747	8.57	8.4	8.6	-0.1805	0.20649	-0.386983
YDL231C	BRE4	3.09	4.55	7.9	8.2	1.46154	0.2632	1.19835		3.683	4.47	7.6	8	0.78559	0.4048	0.38079
YJL196C	ELO1	9.13	8.2	8.9	7.8	-0.931329	-1.14034	0.209015		9.446	8.02	8.9	7.2	-1.42343	-1.71498	0.291549
YLR299W	ECM38	7.32	7.51	6.9	7	0.18875	0.19877	-0.0100158		7.31	7.06	7.1	6.7	-0.24744	-0.37187	0.124424
YLR057W		6.89	7.42	7.5	8.1	0.534553	0.60215	-0.067596		7.016	6.88	7.1	7.2	-0.14056	0.09998	-0.240548
YJR051W	OSM1	7.34	7.41	7.3	7.2	0.077085	-0.08884	0.165927		7.308	7.64	7.3	7.2	0.33652	-0.13014	0.466664
YCR094W	CDC50	6.83	7.26	6.6	6.4	0.423999	-0.19622	0.620217		6.871	6.86	7	7.2	-0.01196	0.22499	-0.236955
YBR297W	MAL33	3.62	5.72	4.1	6.1	2.09613	1.97255	0.123587		3.039	5.06	5.1	5.7	2.02422	0.51956	1.50467
YFR019W	FAB1	7.31	8.01	7.4	7.6	0.696064	0.17373	0.522338		7.966	7.9	7.3	7.4	-0.06923	0.12697	-0.196195
YDR093W	DNF2	8.04	8.16	7.6	7.9	0.122521	0.30054	-0.178018		7.668	6.83	7.7	7.7	-0.8366	-0.02774	-0.808863
YMR210W		6.28	5.87	6.8	6.6	-0.417137	-0.21836	-0.198775		6.526	6.21	6.9	6.5	-0.31306	-0.35729	0.044228
YDL198C	GGC1	7.73	7.31	7	6.4	-0.429628	-0.60218	0.172551		7.186	6.15	6.6	5.6	-1.03218	-1.00671	-0.025469
YPL231W	FAS2	13.23	12.6	11.3	11.2	-0.631041	-0.11493	-0.516109		12.571	11.22	10.9	10.3	-1.35058	-0.59157	-0.759001
YAL036C	RBG1	8.46	8.25	7.9	7.8	-0.20979	-0.11924	-0.090548		8.281	8.24	8.1	8.2	-0.0406	0.11283	-0.153433
YLR417W	VPS36	6.38	6.2	7	7.4	-0.185385	0.40624	-0.591623		5.805	5.56	6.8	7.1	-0.24912	0.29172	-0.540841
YKR050W	TRK2	3.58	4.83	6.7	6.8	1.25651	0.08136	1.17514		2.443	5.18	6.5	6.6	2.7381	0.09528	2.64282
YHR170W	NMD3	8.51	8.66	8	8.3	0.153911	0.32404	-0.17013		8.441	8.14	7.7	8.1	-0.30328	0.34265	-0.645924
YDL077C	VAM6	6.68	6.29	7.3	7.1	-0.391984	-0.21533	-0.17665		6.42	6.56	7.1	7.3	0.13988	0.18169	-0.041804
YHR017W	YSC83	6.21	6.56	6.7	6.7	0.341425	0.00793	0.333491		6.713	6.38	6.6	6.1	-0.33768	-0.48678	0.149098
YDL110C	TMA17	6.71	6.77	6	5.6	0.063508	-0.4007	0.464205		7.392	8	6.2	5.6	0.60455	-0.53045	1.13499
YMR298W	LIP1	8.26	7.84	6.9	6.3	-0.417129	-0.59145	0.174318		8.307	7.56	7.2	6.6	-0.7454	-0.61352	-0.131885
YOR212W	STE4	7.81	7.95	8.8	8.5	0.14165	-0.26043	0.402078		7.681	7.82	8.7	8.5	0.13554	-0.18424	0.319775
YPR138C	MEP3	5.92	6.32	7	7.3	0.395313	0.36941	0.0258998		5.536	5.35	6.7	6.9	-0.18906	0.27107	-0.460134
YJL079C	PRY1	9.35	10.03	8.2	8.2	0.681048	0.01003	0.671014		9.082	8.62	7.7	7.2	-0.45762	-0.47807	0.020446
YLR174W	IDP2	-0.81	1.6	4.8	5.6	2.41459	0.7462	1.66839		0.371	4.9	5.2	5.2	4.52759	-0.01492	4.54251
YMR223W	UBP8	5.94	6.35	6.7	6.7	0.406833	-0.00015	0.406985		5.901	6.13	6.1	6.4	0.23077	0.34135	-0.110588
YLR200W	YKE2	6.78	6.56	5.7	5.1	-0.224797	-0.56468	0.339883		6.604	6.55	5.5	4.9	-0.0565	-0.6057	0.549206
YPL066W		5.86	6.09	7.2	7.3	0.231767	0.08583	0.145939		6.038	6.72	7.6	7.3	0.6776	-0.25877	0.93637
YBL018C	POP8	5.52	5.63	6.7	6.3	0.105335	-0.45769	0.563023		5.508	5.07	7.1	6.7	-0.43409	-0.42739	-0.0067
YER128W		4.79	5.05	4.4	4.7	0.260666	0.28434	-0.0236698		5.283	5.99	5.3	5.7	0.7039	0.42904	0.274857
YNR044W	AGA1	8.87	7.52	6.9	6.2	-1.34949	-0.71543	-0.634064		8.776	9.27	6.6	7.7	0.49196	1.15854	-0.666575
YKL186C	MTR2	7.05	7.11	6.8	7.1	0.061035	0.29616	-0.235127		7.317	7.59	7.2	7.1	0.26872	-0.05945	0.328171
YPR082C	DIB1	5.4	6.25	6	6	0.847129	-0.0127	0.859832		5.617	6.72	5.9	5.5	1.10158	-0.38567	1.48725
YLR301W		9.86	9.42	8.5	7.7	-0.432407	-0.72139	0.288978		9.919	9.35	8.4	7.4	-0.57374	-1.00594	0.432199
YMR194W	RPL36A	10.5	10.6	9.7	9.2	0.099471	-0.50732	0.606788		10.164	10.24	9.8	9.2	0.07949	-0.56084	0.640335
YGL003C	CDH1	5.85	5.95	6.9	7.1	0.095815	0.18394	-0.0881279		5.761	6.2	6.9	7	0.43695	0.06308	0.373872
YKL087C	CYT2	6.24	5.96	5.7	5.9	-0.285211	0.21239	-0.497599		6.521	5.99	6.1	5.6	-0.53386	-0.5436	0.009737
YDR208W	MSS4	7.68	8.04	8	8.1	0.364267	0.16165	0.202619		7.738	8.21	7.9	7.9	0.47359	-0.02418	0.497772
YDR363W-A	SEM1	7.06	6.65	7.2	6.6	-0.405945	-0.61122	0.205277		6.808	6.62	6.8	7.1	-0.18986	0.33111	-0.520974
YHR143W	DSE2	9.75	9.42	9.4	8.8	-0.3353	-0.68922	0.353918		9.187	9.29	8.7	9.3	0.1069	0.58866	-0.481763
YIR025W	MND2	4.64	4.99	5.4	5.6	0.346192	0.15271	0.193477		5.082	5.19	5.8	6.3	0.10727	0.50298	-0.395713
YHR042W	NCP1	9.71	9.08	8.3	8.1	-0.631913	-0.16847	-0.463447		9.37	7.41	8.3	8.2	-1.96252	-0.13163	-1.83089
YHR204W	MNL1	6.47	5.92	7.8	7.6	-0.545251	-0.11152	-0.433727		5.58	5.7	7.9	7.7	0.11889	-0.20401	0.322896
YDL220C	CDC13	5.11	6.04	5.9	6.3	0.938669	0.36308	0.575594		5.07	5.29	6.1	5.8	0.22404	-0.23821	0.462252
YDR280W	RRP45	6.56	6.65	6.9	6.8	0.089306	-0.12183	0.21114		6.585	6.37	7.2	7	-0.21501	-0.23063	0.015624
YJR141W		4.3	3.76	6.1	6.3	-0.547465	0.19467	-0.742135		4.153	4.21	6.4	6.5	0.06161	0.12073	-0.05912
YBR286W	APE3	11.82	11.83	10.9	10.6	0.016594	-0.34651	0.363109		11.749	11.52	11.1	10.8	-0.22687	-0.36714	0.140268
YBR149W	ARA1	9.62	9.63	8.8	8.6	0.00263	-0.19164	0.194268		9.804	9.78	8.7	8.2	-0.02806	-0.51023	0.48217
YJR040W	GEF1	7.5	7.28	7.6	7.4	-0.224183	-0.17376	-0.0504235		7.354	7.56	7.4	7.3	0.20901	-0.10147	0.310476
YOR265W	RBL2	6.86	6.63	6	5.5	-0.232087	-0.50768	0.275596		7.064	7.04	6.6	5.6	-0.02683	-1.00719	0.980356
YPL022W	RAD1	6.13	6.41	7.7	8.1	0.274644	0.43131	-0.156665		5.486	6.49	7.1	8	0.99978	0.81331	0.186465
YDR183W	PLP1	4.91	5.01	5.9	5.5	0.100317	-0.43824	0.538553		5.54	5.58	6.2	6.3	0.03881	0.05446	-0.015652
YPL220W	RPL1A	13.11	13.06	12.6	12.1	-0.050628	-0.49665	0.446027		12.834	12.62	12.2	11.4	-0.21681	-0.83351	0.616702
YGL201C	MCM6	7.96	7.78	7.6	8	-0.1806	0.32187	-0.502472		7.577	7.11	7.8	7.5	-0.47079	-0.29567	-0.175116
YDR082W	STN1	3.68	2.28	6.4	6.9	-1.3988	0.48845	-1.88724		2.874	4.58	6.7	6.9	1.70294	0.1142	1.58874
YFR008W	FAR7	4.96	5.27	4.8	5.1	0.311439	0.29923	0.0122138		6.01	6.15	5.2	4.8	0.13966	-0.43365	0.573309
YCL043C	PDI1	12.06	11.61	10.3	9.5	-0.45641	-0.73547	0.27906		12.548	11.24	10.7	9.1	-1.30615	-1.51345	0.207299
YJR105W	ADO1	11.26	11.28	10.2	9.8	0.019356	-0.41271	0.432062		11.122	11.2	9.9	9.1	0.07529	-0.8347	0.909996
YAL005C	SSA1	14.61	13.36	11.5	10.4	-1.24806	-1.12627	-0.121791		15.586	14.25	12.3	10.9	-1.33489	-1.38441	0.049517
YDL167C	NRP1	7.43	7.69	7.8	8	0.258595	0.24638	0.0122138		6.929	6.8	7.8	8.2	-0.1315	0.39638	-0.527886
YHR006W	STP2	7.37	7.57	7.7	8.1	0.197628	0.39857	-0.200939		7.328	8.23	7.8	8.4	0.9028	0.59126	0.311537
YKR027W	BCH2	6.39	6.7	7.4	7.4	0.312047	-0.07464	0.386686		6.606	6.59	7.6	7.5	-0.01767	-0.15249	0.134823
YNL050C		5.71	5.9	6.6	6.8	0.187062	0.12186	0.0651995		5.759	6.13	6.9	7.5	0.36874	0.6355	-0.266762
YEL001C	IRC22	8.94	8.89	8.3	7.8	-0.047689	-0.47169	0.423999		9.038	8.38	8.2	7.3	-0.66003	-0.88553	0.225497
YIL085C	KTR7	6.41	7.04	7.8	8	0.620915	0.23921	0.381704		6.617	6.28	7.8	7.7	-0.33428	-0.11328	-0.221007
YBR084W	MIS1	9.7	10.11	9	9	0.406244	0.01461	0.391634		9.375	8.8	9.2	9	-0.57516	-0.15796	-0.417203
YLR345W		6.56	6.61	7.3	7.3	0.055174	-0.00579	0.060962		6.903	6.76	6.9	7	-0.14492	0.10624	-0.25116
YJL068C		8.08	7.72	7.3	6.4	-0.360227	-0.85689	0.496661		8.772	8.43	7.6	6.4	-0.33892	-1.1569	0.817973
YMR065W	KAR5	4.04	4.31	6.2	6.3	0.276964	0.08817	0.188797		3.139	5.16	5.7	6.2	2.02441	0.50667	1.51774
YMR267W	PPA2	6.57	6.13	6.6	6.4	-0.440932	-0.13317	-0.307758		6.765	6.09	6.9	6.4	-0.67834	-0.46411	-0.214227
YOR001W	RRP6	8.25	7.97	7.7	7.9	-0.284125	0.20802	-0.492141		7.602	7.93	7.6	7.9	0.32958	0.27692	0.052654
YMR003W	AIM34	5.38	5.49	5.8	5.2	0.116599	-0.60634	0.722942		5.972	5.43	5.3	4.8	-0.53755	-0.51609	-0.021464
YNL183C	NPR1	7.43	7.05	7.3	7.3	-0.375246	-0.00599	-0.36926		7.096	6.71	7.3	6.9	-0.39008	-0.39818	0.008107
YPL088W		5.13	5.05	6.1	6.9	-0.078542	0.7859	-0.864443		4.691	6.17	6.3	7.3	1.48287	1.04331	0.439567
YGR108W	CLB1	7.49	7.09	8.6	8.4	-0.396616	-0.25685	-0.139768		7.554	5.43	8.7	6.7	-2.11872	-1.977	-0.141718
YDL145C	COP1	10.68	10.35	9.7	9.6	-0.336761	-0.07432	-0.262439		10.445	9.75	9.4	9.3	-0.69415	-0.12625	-0.567893
YBL107C		5.95	5.8	6.1	5.7	-0.148425	-0.39622	0.247792		5.926	6.25	5.8	5.4	0.32606	-0.34883	0.674891
YAL063C	FLO9	4.32	6.09	6	6.8	1.76713	0.81885	0.948287		2.698	5.81	6.4	6.2	3.10915	-0.17306	3.28221
YDL044C	MTF2	5.78	5.42	6.3	6.5	-0.362135	0.15566	-0.517793		5.255	6.35	6	6.4	1.09822	0.33256	0.765663
YBL006C	LDB7	6.22	6.57	7.2	7.3	0.351937	0.17396	0.177981		6.512	6.67	7.5	7.6	0.16261	0.0503	0.11231
YIR007W		6.44	6.37	6.1	6.3	-0.061822	0.16924	-0.231062		6.962	7.06	6.5	6.3	0.0966	-0.15254	0.249136
YGL164C	YRB30	6.35	6.16	6.3	6.3	-0.195889	-0.07141	-0.124481		6.296	6.54	6.2	6.8	0.24815	0.6299	-0.381758
YER182W	FMP10	6.42	6.28	5.5	5.5	-0.133806	-0.07715	-0.0566539		6.061	5.95	5.4	5.5	-0.11584	0.11616	-0.231995
YJL187C	SWE1	5.4	4.98	7	6.7	-0.414265	-0.3148	-0.099469		5.568	4.32	6.6	6.1	-1.25247	-0.43766	-0.814805
YGL065C	ALG2	7.18	7.17	6.8	6.8	-0.007321	-0.07086	0.063534		7.606	6.67	6.7	6.4	-0.9313	-0.23556	-0.695748
YCL061C	MRC1	6.29	6.69	6.8	6.7	0.400894	-0.09545	0.496341		5.936	6.16	4.7	6.4	0.21993	1.72276	-1.50283
YFL002C	SPB4	7.17	7.23	7.2	7.3	0.062067	0.13451	-0.072444		6.982	6.92	6.8	7.3	-0.06591	0.47756	-0.543469
YPL101W	ELP4	7.11	7.29	7.1	7.2	0.188646	0.15781	0.0308391		6.988	6.69	7.3	7.2	-0.29954	-0.12206	-0.177482
YOR346W	REV1	6.51	6.56	7.6	8	0.053935	0.34888	-0.294949		6.591	5.99	5.8	7.4	-0.6015	1.56961	-2.17111
YBR268W	MRPL37	5.97	5.66	5.9	5.6	-0.307187	-0.36394	0.0567564		5.883	5.92	5.5	5.2	0.04057	-0.2423	0.282865
YOR188W	MSB1	7.58	7.31	6.9	6.9	-0.264261	0.01295	-0.277215		7.254	6.97	7.1	6.8	-0.28732	-0.39453	0.107212
YOR247W	SRL1	10.27	9.66	9.1	8.3	-0.610862	-0.7885	0.177636		10.118	7.47	8.7	7.1	-2.64743	-1.67004	-0.977395
YLR424W	SPP382	5.92	5.28	6.3	6.1	-0.634224	-0.21107	-0.423154		5.455	5.78	5.6	6.1	0.32459	0.53181	-0.207217
YKL168C	KKQ8	6.39	5.96	6.9	6.9	-0.43	-0.06464	-0.36536		6.059	6.52	7	6.6	0.46176	-0.4718	0.93356
YNL024C-A	KSH1	6.01	6.87	6.2	6.1	0.859169	-0.15283	1.012		6.461	7.19	6.5	6	0.72712	-0.55408	1.2812
YGL120C	PRP43	9.24	8.97	8.5	8.7	-0.264597	0.16579	-0.430383		9.085	8.51	8.4	8.4	-0.57977	-0.01434	-0.565432
YDL088C	ASM4	7.26	7.05	7.6	7.7	-0.204682	0.11668	-0.321364		7.045	6.69	7.6	7.2	-0.35292	-0.35446	0.001542
YNL280C	ERG24	8.42	8.08	7.9	7.5	-0.33515	-0.41	0.0748475		8.408	8.18	7.8	7.2	-0.23022	-0.64928	0.419056
YOL029C		-29.06	0.84	5.8	5.5	29.9075	-0.28871	30.1962		-1.941	-28.83	6	6.1	-26.8897	0.09809	-26.9878
YOL128C	YGK3	4.69	5.12	6.6	6	0.423887	-0.61901	1.0429		5.38	5.85	7.3	7	0.4711	-0.29661	0.76771
YHR060W	VMA22	6.75	6.6	6.2	5.7	-0.151908	-0.55332	0.401413		6.662	6.84	5.3	5.8	0.17694	0.48256	-0.305617
YDL101C	DUN1	6.59	6.71	6.9	7.3	0.124508	0.41327	-0.288758		6.348	6.4	6.7	6.7	0.05204	0.02172	0.030323
YCL025C	AGP1	8.24	8.26	7.9	8.9	0.022757	0.96254	-0.939782		7.776	7.29	7.7	8	-0.48562	0.32908	-0.814707
YBL042C	FUI1	8.32	8.25	8.5	9.4	-0.06979	0.938	-1.00779		7.811	7.65	8.6	9.4	-0.15823	0.7563	-0.914529
YEL023C		0.18	2.59	6.1	6.4	2.40601	0.36258	2.04343		-0.948	3.36	5.6	6.1	4.30617	0.43469	3.87148
YMR289W	ABZ2	6.53	6.56	6.9	6.7	0.030513	-0.16276	0.193277		6.289	6.59	6.4	6.5	0.30129	0.04302	0.258277
YOR045W	TOM6	6.95	6.87	6.5	6.1	-0.079879	-0.45724	0.377365		7.099	6.45	6.8	6.2	-0.65129	-0.62277	-0.028518
YLR064W	PER33	7.56	7.17	7.3	7	-0.397099	-0.28935	-0.107748		8.08	7.85	7.7	7.4	-0.22503	-0.27217	0.047143
YDR079C-A	TFB5	4.9	5.64	5	5	0.744538	0.04037	0.704171		5.234	5.69	4.9	4.6	0.45382	-0.33434	0.788162
YBR150C	TBS1	5.3	6.7	5.8	7	1.40549	1.26241	0.143074		5.674	6.17	5.5	6.5	0.49892	1.02857	-0.529649
YNL332W	THI12	3.9	4.87	4.2	4.2	0.9695	-0.03082	1.00032		4.744	6.12	5.5	5.1	1.37609	-0.41801	1.79409
YLL011W	SOF1	7.55	7.59	7.2	7.5	0.034248	0.27114	-0.236887		7.189	7.34	6.8	7.1	0.14801	0.31192	-0.163909
YJL053W	PEP8	6.91	6.61	6.9	6.8	-0.302945	-0.08747	-0.215478		6.877	6.94	7.2	6.9	0.06574	-0.27309	0.33883
YGL092W	NUP145	8.65	8.8	8.6	8.6	0.147807	0.02957	0.118238		8.687	8.74	8.4	8.9	0.05484	0.47454	-0.419698
YGR274C	TAF1	6.88	6.74	7.2	7.4	-0.138541	0.15537	-0.293915		6.823	6.4	5.7	6.8	-0.42068	1.15405	-1.57473
YDR277C	MTH1	5.07	6.45	4.4	6.4	1.37357	2.01642	-0.642854		5.326	6.19	4.8	5.2	0.86013	0.42969	0.430436
YPR031W	NTO1	5.09	5.38	6.7	6.9	0.292408	0.12063	0.171776		5.12	5.07	6.8	6.8	-0.05249	0.027	-0.07949
YHR079C	IRE1	6.41	6.71	6.8	7.3	0.306982	0.50425	-0.197269		6.306	6.75	7.1	7.3	0.44833	0.28753	0.160795
YAL058W	CNE1	6.42	6.64	6.6	6.6	0.223768	0.02093	0.202833		6.943	6.78	7	7.1	-0.16086	0.0483	-0.209157
YCR072C	RSA4	7.42	7.6	7.3	7.8	0.182875	0.53578	-0.352903		7.245	7.56	8.1	8.2	0.312	0.17169	0.140307
YBR037C	SCO1	6.61	6.44	6.8	6.6	-0.17459	-0.17554	0.0009451		6.402	5.86	7.3	6.3	-0.54134	-0.97891	0.43757
YGL139W	FLC3	8.09	8.16	7.5	7.2	0.062852	-0.22187	0.284719		7.871	7.74	7.3	6.9	-0.13211	-0.38258	0.250472
YMR038C	CCS1	8.73	8.22	7.7	7.2	-0.506547	-0.40962	-0.0969284		8.354	8.33	7.6	7.1	-0.0222	-0.47967	0.457464
YJL134W	LCB3	7.36	7.13	7.9	7.3	-0.228609	-0.54622	0.317611		7.838	6.65	8.1	7.5	-1.18712	-0.60773	-0.579393
YDR310C	SUM1	7.5	7.65	7.7	7.6	0.149373	-0.13494	0.28431		7.253	6.85	7.5	7.2	-0.40504	-0.34931	-0.055737
YIL050W	PCL7	6.76	6.35	6.1	5.9	-0.410698	-0.15003	-0.260663		6.679	7.01	6	5.9	0.33024	-0.10969	0.439937
YHL015W	RPS20	11.92	11.62	11.1	10.6	-0.303291	-0.55877	0.255475		11.566	11.16	10.8	10.1	-0.40396	-0.65075	0.246791
YMR319C	FET4	6.06	5.37	7.7	7.3	-0.686736	-0.41979	-0.26695		4.16	5.06	7.1	7	0.89711	-0.06518	0.962292
YHR203C	RPS4B	13.45	13.48	12.3	11.9	0.022918	-0.42377	0.446685		13.195	13.12	12.1	11.6	-0.07093	-0.55995	0.48902
YNL299W	TRF5	6.1	6.04	6.8	7	-0.059301	0.12605	-0.185354		5.901	6.15	7.2	7.4	0.25225	0.20879	0.043467
YFR033C	QCR6	7.01	8.18	6.7	7.1	1.16931	0.43117	0.738139		7.373	8.11	6.9	6.5	0.73599	-0.3148	1.05079
YEL018W	EAF5	4.96	5.34	6.4	6.2	0.372614	-0.24217	0.614784		5.128	5.67	6.5	6.3	0.54009	-0.15763	0.697721
YLR035C-A		12.04	12.27	12.8	12.4	0.225317	-0.40784	0.633154		12.085	12.42	12.5	12.9	0.33469	0.468	-0.133302
YLR039C	RIC1	7.47	7.15	6.9	7.2	-0.322098	0.28735	-0.609448		7.336	6.99	6.1	7.2	-0.34364	1.01315	-1.35679
YIL173W	VTH1	7.23	7.28	7.8	8.3	0.056745	0.58938	-0.532638		6.493	7.15	7.5	8.4	0.65741	0.85574	-0.198331
YFL017W-A	SMX2	6.06	5.63	5.4	4.8	-0.430311	-0.59572	0.165412		6.348	6.08	5.6	5.3	-0.265	-0.32903	0.064032
YER113C	TMN3	6.68	7.07	7.2	7.2	0.394534	0.01754	0.376994		7.16	6.54	7.1	6.7	-0.61596	-0.33837	-0.277593
YDR233C	RTN1	10.76	10.81	9.4	9.1	0.05315	-0.34918	0.402334		10.575	10.37	9.2	8.3	-0.20221	-0.92526	0.72305
YLL055W	YCT1	2.35	2.74	5.7	6.1	0.390344	0.37456	0.0157809		2.29	3.97	5.4	5.6	1.6811	0.19087	1.49023
YML010W	SPT5	9.56	9.14	8.7	8.7	-0.416027	-0.03503	-0.380994		9.066	8.33	8	8.2	-0.73698	0.15484	-0.891815
YOR119C	RIO1	6.98	6.52	6.8	7.1	-0.462855	0.34423	-0.807084		6.084	6.09	6.5	7.3	0.00518	0.7257	-0.720522
YDR516C	EMI2	8.32	7.85	7.9	7.5	-0.464055	-0.36914	-0.0949131		8.391	7.73	7.6	6.5	-0.66601	-1.13677	0.470764
YKL171W	NNK1	5.09	6.05	5.8	6.3	0.960999	0.50207	0.458926		5.032	5.67	6.1	6.1	0.6387	0.00851	0.630192
YLR192C	HCR1	9.15	8.54	8.4	8	-0.610147	-0.47003	-0.140119		8.812	8.46	8.6	7.9	-0.34786	-0.67386	0.326001
YOL056W	GPM3	6.47	5.57	5.9	5.8	-0.901728	-0.12792	-0.773807		6.316	6.08	6.4	6.2	-0.23478	-0.19445	-0.040332
YDR435C	PPM1	6.34	6.01	6.1	6.2	-0.328916	0.09633	-0.42525		5.252	5.65	5.7	5.8	0.39395	0.11484	0.279116
YPL019C	VTC3	7.23	7.26	7.6	7.4	0.036068	-0.2051	0.241172		7.688	7.3	7.4	7.4	-0.38501	0.06065	-0.445658
YML098W	TAF13	6.05	5.7	5.8	5.8	-0.35255	-0.08055	-0.272003		5.925	6.07	6.4	6	0.14213	-0.33514	0.477268
YIL014W	MNT3	6.83	6.79	7.5	7.6	-0.042013	0.12337	-0.165381		6.707	6.58	7.3	7.5	-0.12791	0.1856	-0.313517
YBL097W	BRN1	6.62	6.13	6.1	6.5	-0.493533	0.32606	-0.819592		6.031	5.69	5.6	6	-0.33969	0.44115	-0.780843
YGR098C	ESP1	6.88	6.81	7.3	7.4	-0.076398	0.12892	-0.205314		6.775	6.2	6.6	6.6	-0.5709	-0.03581	-0.535096
YGR177C	ATF2	6.58	5.34	6.8	6.6	-1.24261	-0.24524	-0.997368		6.588	4.59	7.1	5.9	-1.99714	-1.28788	-0.709265
YLR291C	GCD7	8.41	8.23	7.6	7.4	-0.181586	-0.15146	-0.0301269		8.339	7.95	7.3	7.3	-0.39315	-0.04085	-0.3523
YMR092C	AIP1	9.4	9.1	9.1	8.5	-0.296085	-0.59415	0.298064		9.736	9.3	9.3	8.8	-0.43281	-0.58344	0.15063
YOR090C	PTC5	7.53	7.45	7.5	7.3	-0.075936	-0.16005	0.0841124		7.251	7.49	7.8	7.7	0.24329	-0.12135	0.364639
YKL117W	SBA1	10.12	9.79	9	8.2	-0.328984	-0.75324	0.42426		10.076	9.92	9	8	-0.15187	-0.94685	0.794987
YBR172C	SMY2	7.73	7.88	7.7	8	0.149403	0.32568	-0.176281		7.666	7.52	7.5	8	-0.14667	0.45913	-0.605801
YNL233W	BNI4	6.98	7.24	7.1	7.4	0.263831	0.22611	0.0377193		6.756	6.87	7.1	7.4	0.11064	0.27398	-0.163344
YDR453C	TSA2	5.72	5.65	4.7	4.8	-0.066408	0.12243	-0.188842		7.035	7.61	5.8	5.9	0.57252	0.03949	0.533027
YLL033W	IRC19	4.22	4.86	5.3	5.3	0.633545	-0.01391	0.647459		5.17	5.79	6.1	6.2	0.61994	0.17549	0.444442
YOL113W	SKM1	5.07	4.78	7.1	7.5	-0.29154	0.35812	-0.649663		5.449	5.88	6.9	7.2	0.43199	0.30083	0.131167
YCR014C	POL4	-0.81	2.28	6	6.1	3.09077	0.15153	2.93924		1.048	2.92	4.3	5.3	1.86854	1.00144	0.867107
YDR130C	FIN1	4.91	5.24	6.4	5.9	0.323334	-0.54673	0.870064		5.717	5.49	6.5	6.2	-0.22823	-0.26869	0.040466
YPL190C	NAB3	8.72	8.88	7.5	7.8	0.155433	0.265	-0.109562		8.5	8.58	7.6	7.6	0.07844	-0.00239	0.080829
YJR021C	REC107	4.14	3.98	6.2	6	-0.160513	-0.14457	-0.01594		4.591	5.16	7.1	6.5	0.56491	-0.62513	1.19004
YBL079W	NUP170	8.47	8.77	8.2	8.3	0.297797	0.1066	0.191199		8.466	7.99	7.7	8.2	-0.47616	0.44005	-0.916209
YMR242C	RPL20A	12.19	12.16	10.4	10.1	-0.030823	-0.28527	0.254448		11.841	11.4	10	9.4	-0.43923	-0.53457	0.095337
YPL241C	CIN2	5.35	5.65	5.7	5.7	0.305732	0.01317	0.29256		4.159	3.92	5	4.6	-0.24252	-0.37813	0.13561
YMR290C	HAS1	9.22	8.93	7.7	7.9	-0.285847	0.24934	-0.535188		8.794	8.38	7.8	8.1	-0.41188	0.31611	-0.727989
YER175C	TMT1	6	5.94	6.5	5.9	-0.058151	-0.53886	0.480707		6.063	6.93	6.4	6.5	0.8651	0.04078	0.824318
YML111W	BUL2	7.11	7.55	7.6	8	0.438471	0.32776	0.110711		6.842	7.13	7.2	7.4	0.29026	0.17712	0.113134
YPR057W	BRR1	4.65	5.15	6.8	6.7	0.501315	-0.06896	0.570277		5.687	5.75	6.8	6.8	0.06027	-0.0345	0.09477
YER056C	FCY2	9.44	9.02	10	10.1	-0.423282	0.05677	-0.480053		9.257	9.55	10.2	10.6	0.29309	0.31012	-0.017028
YNL075W	IMP4	7.55	7.29	7.1	7.2	-0.262972	0.13943	-0.4024		7.024	7.35	7.3	7.3	0.32742	0.00379	0.323628
YJL071W	ARG2	6.2	6.04	6.4	6.7	-0.156159	0.3526	-0.508758		5.746	5.78	6.6	6.4	0.03698	-0.17971	0.21669
YKL034W	TUL1	7.01	7.08	7.1	7	0.071813	-0.03415	0.105967		7.101	6.62	7	7.1	-0.48345	0.05186	-0.535308
YDR255C	RMD5	4.83	4.82	5.1	5.1	-0.002209	0.07817	-0.0803829		5.275	5.81	5.2	4.7	0.53898	-0.51173	1.05072
YOR292C		5.38	5.39	6.7	6.1	0.008045	-0.61624	0.624285		5.887	5.91	6.7	6.1	0.02166	-0.59384	0.615505
YBR015C	MNN2	9.34	9.05	8.2	8.1	-0.287636	-0.08844	-0.1992		9.197	8.38	8.3	8	-0.81723	-0.35311	-0.464119
YOL030W	GAS5	10.16	10.37	8.7	8.6	0.209415	-0.07828	0.287693		10.171	9.8	8.4	7.9	-0.36933	-0.5329	0.163571
YMR218C	TRS130	7.03	6.93	7.3	7.8	-0.102919	0.48567	-0.588592		6.535	7.02	6.8	7.6	0.48521	0.76097	-0.275757
YFR011C	AIM13	6.96	6.98	6.1	5.9	0.022769	-0.23799	0.260759		7.217	6.78	6.3	5.9	-0.43513	-0.31553	-0.119598
YIL036W	CST6	7.52	7.79	7.1	7.3	0.268139	0.17254	0.095594		7.471	7.83	7.2	7.3	0.35531	0.13724	0.218071
YPR002W	PDH1	3.24	4.58	4.7	5.7	1.33349	0.95432	0.379174		3.709	6.66	5.2	6.6	2.95208	1.37976	1.57232
YDR397C	NCB2	6.7	6.37	6.5	6.4	-0.339043	-0.14075	-0.198295		6.564	6.87	6.8	6.8	0.30175	-0.06035	0.3621
YNL222W	SSU72	6.23	6.54	5.6	6	0.302763	0.33328	-0.0305203		6.766	6.23	6.1	5.6	-0.53734	-0.44905	-0.088288
YDR046C	BAP3	8.77	8.69	8.8	9.4	-0.080843	0.64465	-0.725495		8.189	7.84	8.8	9	-0.35304	0.18013	-0.533169
YGL083W	SCY1	6.76	6.39	6.1	5.9	-0.370484	-0.29075	-0.0797385		6.483	6.08	5.9	5.4	-0.40162	-0.5074	0.105784
YKL007W	CAP1	8.43	8.35	8	7.6	-0.087734	-0.34429	0.256559		8.264	8.23	8.1	7.9	-0.03498	-0.22863	0.193647
YBR141C		4.86	5.44	5.2	5.7	0.584774	0.45237	0.132409		5.541	5.72	5.9	6.2	0.18082	0.31017	-0.129356
YKL106W	AAT1	7.22	6.94	7.2	6.9	-0.281942	-0.34094	0.0590001		7.061	7.25	7.4	6.8	0.19091	-0.56042	0.751334
YPR103W	PRE2	8.84	8.75	8.9	8.4	-0.090103	-0.48425	0.394145		8.934	8.56	8.7	8.2	-0.36998	-0.59266	0.222674
YNL323W	LEM3	8.11	7.76	6.9	6.9	-0.345533	0.06715	-0.412685		7.816	7.42	7.2	7.2	-0.40002	0.03664	-0.436657
YLR262C-A	TMA7	8.18	8.21	8.3	7.8	0.036364	-0.55381	0.590178		7.802	8.38	8.8	8.2	0.57588	-0.60002	1.17591
YFR044C	DUG1	10.25	9.83	8.2	7.6	-0.416151	-0.5608	0.144647		10.311	9.8	8.5	7.8	-0.51465	-0.68861	0.173962
YLR309C	IMH1	7.61	7.39	7.7	7.9	-0.224262	0.2257	-0.449967		7.744	7.58	6.2	8	-0.16527	1.76852	-1.93379
YIL041W	GVP36	10.03	9.87	8.4	8.2	-0.158859	-0.20473	0.045871		9.979	9.73	8.7	8.1	-0.2541	-0.66966	0.415555
YDR200C	VPS64	5.52	5.86	6.3	6.4	0.341163	0.17133	0.169829		6.229	5.57	5.3	6	-0.66393	0.6465	-1.31043
YIL140W	AXL2	8.03	7.26	7.3	6.3	-0.769706	-1.02941	0.259703		7.993	6.79	7.1	6.1	-1.20295	-0.97693	-0.226016
YMR029C	FAR8	6.9	7.08	7.4	7.3	0.187169	-0.06889	0.256062		7.044	6.96	7.3	7.4	-0.08611	0.08702	-0.173121
YCR027C	RHB1	5.64	5.26	6.2	6.1	-0.378124	-0.1118	-0.266327		5.409	5.67	6.8	6.6	0.26356	-0.10699	0.370548
YBL068W	PRS4	7.71	7.3	7.3	7	-0.407002	-0.28664	-0.120361		7.38	7.48	7.4	7.4	0.10298	0.00141	0.101578
YER065C	ICL1	1.75	3.12	5.5	5.3	1.37231	-0.13415	1.50646		2.045	1.77	5.2	4.3	-0.27358	-0.94763	0.674048
YKL205W	LOS1	8.16	8.2	8.1	8.1	0.033612	0.03271	0.0009024		8.01	7.57	7.5	8	-0.44093	0.43779	-0.878717
YPR046W	MCM16	3.91	4.61	5.2	5.2	0.698084	-0.03863	0.736718		5.17	5.53	5.6	5.6	0.35749	-0.01753	0.375015
YJL060W	BNA3	8.04	7.75	6.9	6.9	-0.287284	0.00271	-0.289994		7.721	7.34	6.9	6.5	-0.38541	-0.40007	0.014655
YML001W	YPT7	8.57	8.58	8	7.5	0.014804	-0.52854	0.543343		8.237	8.2	8.1	7.5	-0.04167	-0.68306	0.641387
YML100W	TSL1	10.12	10.35	10.1	9.7	0.227169	-0.43638	0.663546		11.339	11.55	9.7	9.5	0.21263	-0.24879	0.461423
YDR345C	HXT3	11.1	11.78	10	11.2	0.675871	1.20963	-0.533761		10.519	9.98	9.6	10.3	-0.53719	0.72489	-1.26207
YNL165W		4.08	5.41	5.8	5.8	1.3332	0.05137	1.28184		4.955	5.11	6.4	6	0.15333	-0.3238	0.477134
YJL161W	FMP33	3.92	5.57	5	5.8	1.65759	0.80198	0.855613		5.667	7.15	5.5	6.4	1.47907	0.83373	0.645339
YBR004C	GPI18	6.19	6.78	6.3	7.3	0.58615	1.02579	-0.439639		6.411	6.73	6.6	6.9	0.32416	0.28007	0.044088
YLR183C	TOS4	7.12	6.33	7.2	6.7	-0.784547	-0.48306	-0.301486		6.872	5.39	6.6	5.8	-1.48319	-0.81851	-0.664683
YKL043W	PHD1	5.4	5.69	5.7	5.8	0.284461	0.13125	0.15321		5.053	3.99	4.2	3.7	-1.06801	-0.48231	-0.585698
YLR082C	SRL2	5.27	5.81	6.5	6.5	0.540179	0.05377	0.486414		6.383	6.45	6.2	6.3	0.06519	0.11134	-0.046153
YDR507C	GIN4	8.52	7.82	8.1	7.7	-0.699263	-0.4168	-0.282467		7.949	7.29	7.5	7.2	-0.6601	-0.36116	-0.298939
YOL146W	PSF3	6.15	6.37	5.9	5.8	0.218385	-0.11582	0.334205		6.852	6.36	5.8	5.2	-0.49332	-0.53511	0.041786
YKL142W	MRP8	8.67	8.41	7.8	7.6	-0.263398	-0.27338	0.0099848		8.992	9.12	7.9	7.6	0.12774	-0.28752	0.415263
YBR105C	VID24	5.52	6.48	5.8	7.4	0.957854	1.54459	-0.586732		6.057	6.56	6.8	8.5	0.50381	1.68692	-1.18311
YGL209W	MIG2	7.04	8.02	5.9	8.6	0.984596	2.63989	-1.65529		6.09	6.97	6.4	8.1	0.87925	1.68904	-0.809788
YIL005W	EPS1	8.43	8.4	7.1	7.1	-0.02986	0.05159	-0.0814517		7.726	7.54	6.6	7	-0.18148	0.38465	-0.56613
YGR188C	BUB1	4.57	4.86	5.8	5.4	0.293341	-0.39069	0.684032		5.416	5.23	5.9	5.5	-0.18329	-0.37529	0.191996
YKR085C	MRPL20	6.34	6.52	6.5	5.9	0.172682	-0.56097	0.733652		6.731	6.54	6.6	6.4	-0.19138	-0.28394	0.09256
YBR260C	RGD1	6.83	6.92	7	6.9	0.08898	-0.07324	0.162218		7.044	6.63	6.9	7.1	-0.41754	0.15968	-0.577211
YOR180C	DCI1	0.76	2.41	5.2	5.6	1.64577	0.39384	1.25193		0.045	2.78	5.2	4.8	2.73521	-0.38447	3.11967
YNL103W	MET4	6.94	7.33	7.3	7.7	0.386243	0.41119	-0.0249462		6.882	6.99	7.1	7.6	0.10924	0.47694	-0.367697
YOR081C	TGL5	7.25	7.61	7.2	7.2	0.360055	-0.06106	0.421113		7.657	7.43	7.5	7.3	-0.22826	-0.15182	-0.076443
YOL164W	BDS1	2.89	3.36	6.3	6.5	0.470331	0.26389	0.206443		3.079	4.89	6.7	6.8	1.81061	0.02373	1.78688
YKL160W	ELF1	7.48	7.37	7.2	7.1	-0.109304	-0.14915	0.0398476		7.234	7.37	7.5	6.8	0.14031	-0.61572	0.756026
YAR007C	RFA1	8.62	8.01	7.8	7.5	-0.606151	-0.28627	-0.319883		8.179	7.48	7.5	7.1	-0.70081	-0.41037	-0.29044
YCR005C	CIT2	9.08	8.65	11	11.6	-0.425806	0.61832	-1.04412		8.722	11.35	11.2	12.1	2.62797	0.86247	1.76551
YDR020C	DAS2	5.5	5.46	5.1	5.8	-0.042552	0.70775	-0.7503		5.354	5.96	5.3	5.5	0.61005	0.14003	0.47002
YDR323C	PEP7	4.49	4.76	6.2	6.4	0.270042	0.18073	0.0893081		4.748	5.2	6.3	7	0.45636	0.66934	-0.212974
YLR028C	ADE16	9.53	9.28	9.3	8.9	-0.259414	-0.40735	0.14794		9.462	9.12	9.3	8.6	-0.3404	-0.6276	0.287205
YPR165W	RHO1	9.52	9.53	9	8.7	0.011446	-0.24233	0.253781		9.504	9.39	9.1	8.3	-0.11512	-0.77267	0.657554
YIL162W	SUC2	7.52	7.31	6.5	6.8	-0.212547	0.35002	-0.562568		7.567	7.12	7.1	6.4	-0.44587	-0.68401	0.238138
YDL008W	APC11	5.9	5.7	5.9	5.9	-0.196142	0.02517	-0.221308		5.815	6.17	6.4	6.2	0.35509	-0.24635	0.601438
YDR266C		7.43	7.51	7.7	7.8	0.079573	0.03797	0.0416066		7.357	7.11	7.6	7.7	-0.24594	0.12002	-0.365963
YNL046W		5.7	5.18	6.9	6.4	-0.525046	-0.51177	-0.0132769		5.22	5.82	7	6.2	0.6041	-0.81052	1.41463
YJL042W	MHP1	8.16	8.32	7.9	7.8	0.163472	-0.07336	0.236835		8.01	8.05	7.5	7.7	0.04323	0.22489	-0.181663
YJL191W	RPS14B	10.78	10.8	9.8	9.4	0.023872	-0.32984	0.353708		11.199	11.21	10.2	9.5	0.00711	-0.74598	0.753096
YPR020W	ATP20	6.74	7.61	5.9	6.3	0.874848	0.46865	0.406202		6.706	7.44	6	6.7	0.72999	0.65748	0.07251
YER047C	SAP1	6.81	6.95	6.7	7.3	0.140172	0.65809	-0.517918		6.018	7.15	6.8	7.4	1.13124	0.57139	0.559855
YJL143W	TIM17	7.36	6.71	6.8	6.7	-0.656954	-0.12408	-0.532873		7.034	6.93	6.6	6.3	-0.1083	-0.34566	0.237367
YKL124W	SSH4	5.77	6.44	6	6.5	0.670755	0.51038	0.16038		6.432	6.9	5.8	6.4	0.47084	0.59285	-0.122014
YPR121W	THI22	0.77	2.28	6.7	7.3	1.50986	0.59711	0.912747		0.876	2.78	6.7	7.1	1.90407	0.43017	1.4739
YKL190W	CNB1	7.6	7.21	7.2	6.9	-0.390646	-0.21322	-0.177428		7.39	7.62	7.2	7.2	0.23285	0.01876	0.214092
YBR026C	ETR1	8.49	8.11	7.6	7.1	-0.37464	-0.47643	0.101789		8.506	8.6	7.6	7.2	0.09477	-0.45899	0.55376
YBR127C	VMA2	12.03	11.68	10	9.6	-0.351719	-0.42326	0.0715413		11.773	11.35	9.9	9.2	-0.4247	-0.71952	0.294812
YKR049C	FMP46	5.24	5.72	5.8	5.9	0.479699	0.12578	0.353921		5.957	6.08	7.1	6.8	0.12043	-0.29184	0.412268
YMR308C	PSE1	9.67	9.57	9.4	9.6	-0.097547	0.12734	-0.224885		9.574	8.97	9.4	9.4	-0.60322	0.06911	-0.672329
YHL004W	MRP4	7.34	6.86	6.7	6.7	-0.480725	-0.04036	-0.440369		7.511	6.54	6.6	6.3	-0.97446	-0.32928	-0.645189
YGL029W	CGR1	5.35	5.46	5.7	5.8	0.111149	0.13091	-0.0197643		5.758	6.02	4.9	6	0.26587	1.07399	-0.80812
YNL288W	CAF40	7.16	7.11	7.2	7.1	-0.048258	-0.07402	0.0257598		7.001	6.95	7.2	6.9	-0.05277	-0.30705	0.254281
YMR209C		6.55	6.95	7	7.2	0.401741	0.15295	0.248796		6.31	6.57	7.1	6.8	0.25971	-0.2927	0.552413
YDL181W	INH1	6.23	7.87	5.4	6.4	1.64295	0.94584	0.69712		7.002	7.52	6.3	6	0.52227	-0.30732	0.829589
YIL126W	STH1	8.82	8.67	7.8	7.7	-0.142635	-0.14376	0.0011243		8.546	8.14	7.2	7.6	-0.41053	0.301	-0.711534
YBL093C	ROX3	6.5	6.48	6.9	6.5	-0.015204	-0.38769	0.372485		6.678	7.12	7.4	7.1	0.44542	-0.31779	0.763214
YGL179C	TOS3	5.39	5.27	5.9	5.7	-0.121846	-0.2793	0.157455		5.56	5.38	6.2	5.8	-0.17598	-0.40351	0.227534
YCR032W	BPH1	6.27	6.91	6.9	7.4	0.63709	0.4496	0.187487		6.575	6.92	6.5	7.5	0.34739	0.99862	-0.651238
YDR237W	MRPL7	6.42	6.35	6.4	5.9	-0.064149	-0.44656	0.382412		6.639	5.75	6	5.7	-0.88793	-0.32844	-0.559492
YGR234W	YHB1	9.53	8.25	8.5	7.4	-1.27917	-1.13069	-0.148481		7.116	6.3	7.1	6.4	-0.81181	-0.70985	-0.101955
YOL052C	SPE2	7.59	7	7.1	7	-0.593868	-0.06004	-0.53383		8.329	7.4	7.5	6.9	-0.93033	-0.6314	-0.298925
YKL056C	TMA19	11.76	11.95	11.7	11.4	0.188614	-0.31707	0.505688		11.707	11.77	12	11.2	0.05914	-0.79582	0.854966
YER070W	RNR1	11.01	10.4	9.9	9.2	-0.612084	-0.60967	-0.0024164		11.036	9.33	9.5	7.5	-1.70148	-2.02217	0.32069
YDR035W	ARO3	9.25	8.85	8.1	7.9	-0.400309	-0.26105	-0.139263		8.909	8.7	7.8	7.6	-0.21378	-0.20612	-0.007659
YLR439W	MRPL4	6.89	6.15	6.5	6.5	-0.744499	-0.07308	-0.67142		6.387	5.97	6.8	6.6	-0.41973	-0.16976	-0.249975
YBR110W	ALG1	7.43	6.98	7.5	7.5	-0.45168	0.01552	-0.467195		7.117	6.93	7.3	7.5	-0.18465	0.21548	-0.400138
YDL059C	RAD59	3.23	3.21	4.7	4.6	-0.021742	-0.04187	0.0201276		4.109	3.97	5.2	5.4	-0.13435	0.25267	-0.387024
YIL098C	FMC1	5.29	5.04	5.6	5.4	-0.248877	-0.23968	-0.0091951		5.355	5.76	5.8	5.8	0.40916	0.00982	0.399342
YLR196W	PWP1	8.67	8.77	8	8.2	0.101702	0.22648	-0.124777		8.297	8.33	7.8	8.1	0.03015	0.26339	-0.233234
YOR195W	SLK19	7.15	6.95	6.3	6.6	-0.19187	0.28542	-0.477293		7.199	6.52	1.4	6.3	-0.67761	4.88733	-5.56494
YHR192W		6.63	6.81	6.7	6.5	0.180216	-0.24554	0.425761		6.893	7.04	7	6.8	0.14266	-0.27958	0.422237
YPR152C	URN1	4.92	5.35	5.6	6.3	0.435814	0.65246	-0.216646		5.195	5.36	6.3	6.4	0.17028	0.09907	0.071215
YLL051C	FRE6	6.34	6.57	7.6	7.9	0.235648	0.32075	-0.0851		6.089	6.58	7.6	8	0.49347	0.47589	0.017575
YJL013C	MAD3	5	5.92	6.4	6.4	0.916968	0.05071	0.86626		5.454	5.9	6	6.2	0.44378	0.1887	0.255077
YNL251C	NRD1	8.32	8.65	7.7	7.3	0.333919	-0.36295	0.696873		8.026	7.77	7.1	6.6	-0.2578	-0.51292	0.255122
YNL134C		10.23	10.38	9.5	9.4	0.144939	-0.14387	0.288805		9.558	10.15	8.8	8.7	0.58778	-0.11599	0.703772
YPL059W	GRX5	7.77	7.31	6.9	6.3	-0.45864	-0.56261	0.103969		7.795	7.77	7.1	6.3	-0.02079	-0.79671	0.775926
YJL057C	IKS1	6.41	5.75	6.8	6.8	-0.654499	-0.0585	-0.595998		6.484	6.92	6.7	6.6	0.43315	-0.13333	0.566477
YER034W		5.88	6.45	5.9	6.5	0.565393	0.58144	-0.0160434		5.976	6.4	6.4	6.6	0.42695	0.21091	0.216031
YOL135C	MED7	5.63	5.58	5.7	5.9	-0.049779	0.15605	-0.20583		6.06	6.1	5.7	5.8	0.03567	0.04783	-0.01216
YDR152W	GIR2	7.48	7.14	7	7.2	-0.340788	0.25965	-0.600434		7.742	7.28	7.5	7.6	-0.46255	0.11882	-0.581372
YLR079W	SIC1	6.85	6.86	7.3	6.9	0.013623	-0.32671	0.340336		7.044	6.98	7.2	6.8	-0.0598	-0.4529	0.393108
YOR278W	HEM4	5.61	5.59	6.5	6.1	-0.018304	-0.38182	0.363517		5.672	6.64	7	6.8	0.96991	-0.2287	1.1986
YOL016C	CMK2	7.08	7.29	7.1	8.4	0.207395	1.26258	-1.05519		7.267	7.8	6.7	7.7	0.52974	1.0029	-0.473158
YGR270W	YTA7	8.14	7.7	8.4	8.4	-0.445	0.01074	-0.455738		7.443	7.18	7.9	8.5	-0.26731	0.53682	-0.804127
YGR072W	UPF3	6.29	6.06	6.5	6.7	-0.230796	0.1844	-0.415194		6.165	6.12	5.6	6.9	-0.04039	1.31232	-1.35271
YLR394W	CST9	1.49	2.84	6	6.2	1.35027	0.14722	1.20305		0.372	2.92	5.7	6.1	2.54899	0.42052	2.12846
YJL130C	URA2	12.13	12.1	10	10.2	-0.037258	0.24819	-0.285446		11.716	11.31	9.9	10.4	-0.40911	0.51604	-0.925157
YHL011C	PRS3	8.74	8.68	8.8	8.6	-0.061593	-0.19151	0.129917		8.797	8.79	9	8.9	-0.00854	-0.10071	0.092176
YMR294W	JNM1	3.79	4.59	5.7	5.9	0.799105	0.23773	0.561374		4.744	5.07	5.2	6.1	0.32677	0.95387	-0.627097
YER171W	RAD3	7.13	6.88	7.6	7.9	-0.248069	0.29832	-0.546386		6.85	6.51	7.9	7.9	-0.34335	0.05935	-0.4027
YMR179W	SPT21	6.02	5.81	6.4	6.3	-0.210357	-0.0753	-0.13506		5.891	5.67	5.7	5.7	-0.21744	0.07711	-0.294557
YDR251W	PAM1	7.94	7.86	8.3	8.1	-0.076173	-0.10227	0.0260936		7.612	7.72	7.6	7.6	0.11067	-0.00753	0.118206
YOR296W		6.23	6.32	6.7	6.8	0.086554	0.10714	-0.0205839		6.14	5.97	6.3	6.7	-0.17503	0.42507	-0.600107
YCL038C	ATG22	6.61	7.26	7.1	7.5	0.653898	0.34782	0.306075		6.976	7.29	7.4	7.5	0.31383	0.07074	0.243085
YBR257W	POP4	5.01	5.46	6.1	6.4	0.45136	0.34222	0.109141		5.659	5.69	5.8	6.9	0.03395	1.09533	-1.06137
YJL156C	SSY5	6.73	7	7.4	7.5	0.265245	0.11707	0.148173		6.786	7.31	7	7.2	0.51885	0.25104	0.267803
YML115C	VAN1	8.62	8.31	7.9	8.1	-0.31337	0.21213	-0.525501		8.246	7.5	8.1	7.9	-0.74666	-0.23732	-0.50934
YGL078C	DBP3	8.94	8.86	8	8	-0.079128	0.03418	-0.113308		8.203	8.36	7.6	7.9	0.15556	0.24746	-0.091899
YHR219W		7.95	9.31	10.5	10.9	1.36176	0.32983	1.03194		6.79	8.77	10.7	10.6	1.98492	-0.10178	2.0867
YBR213W	MET8	5.91	5.08	5	4.9	-0.829469	-0.08182	-0.747645		5.433	4.75	5.6	5.2	-0.6828	-0.41037	-0.272427
YDR336W		4.32	5.25	6.4	6.2	0.932148	-0.19064	1.12279		4.945	5.71	6.8	6.8	0.77011	0.06148	0.708629
YKL113C	RAD27	7.32	6.87	7.1	6.5	-0.448207	-0.58917	0.140965		7.105	6.19	6.4	5.7	-0.91126	-0.66929	-0.241976
YNR059W	MNT4	5.06	4.06	6.6	7.1	-1.00576	0.46985	-1.47561		4.274	4.37	6.8	6.8	0.09564	0.02049	0.075148
YER016W	BIM1	7.06	6.74	7.2	6.8	-0.31988	-0.36518	0.0452986		6.781	6.22	6.6	6.5	-0.56027	-0.07855	-0.481716
YPR017C	DSS4	5.65	5.27	5.5	5.5	-0.385294	-0.04113	-0.344164		4.449	3.78	5.9	5.1	-0.66485	-0.81512	0.150263
YPL194W	DDC1	5.52	5.58	5.6	5.1	0.062349	-0.42258	0.484931		4.897	5.39	5.6	5.7	0.49112	0.15306	0.338068
YGR014W	MSB2	9.29	8.92	8.6	8.3	-0.368108	-0.25642	-0.111691		9.748	8.42	8.8	8	-1.32354	-0.77136	-0.552186
YOL070C	NBA1	7.92	8	7.9	7.9	0.075062	-0.00943	0.0844965		8.044	7.9	7.9	7.8	-0.14481	-0.0622	-0.082608
YKL074C	MUD2	6.29	6.36	7.1	7	0.068272	-0.07969	0.147962		6.031	6.46	7	7	0.42905	-0.03381	0.46286
YNL035C		7.41	6.75	7.1	6.8	-0.663354	-0.26223	-0.40112		7.063	6.69	6.9	6.9	-0.36875	-0.02661	-0.342135
YBL039C	URA7	10.09	9.8	8.7	8.8	-0.295219	0.15017	-0.445387		9.752	9.21	9.1	9	-0.53904	-0.07888	-0.460156
YGR173W	RBG2	7.99	7.82	7.8	7.6	-0.169291	-0.20978	0.0404934		8.25	7.88	8.1	8.1	-0.37386	0.02948	-0.403336
YMR096W	SNZ1	1.18	4.35	5.2	5.9	3.17344	0.69066	2.48279		1.766	7.21	5.9	7.4	5.44179	1.4832	3.95859
YOR094W	ARF3	5.91	6.1	6.4	5.9	0.183906	-0.50924	0.693148		6.351	6.18	6.8	6.7	-0.17642	-0.09564	-0.080778
YBR176W	ECM31	6.1	6.24	6.1	6.1	0.138477	0.05483	0.0836515		6.616	6.48	6.6	6.2	-0.13741	-0.46636	0.328947
YDR457W	TOM1	9.47	9.7	8.2	8.5	0.226931	0.2982	-0.0712737		9.392	9.46	7.9	8.3	0.06694	0.33942	-0.272474
YGR252W	GCN5	6.08	5.94	6.9	6.9	-0.137428	0.03777	-0.175195		6.037	5.1	6.6	6.5	-0.93812	-0.12131	-0.816807
YIL155C	GUT2	6.66	7.81	6.8	7.5	1.15216	0.71345	0.438705		7.168	8.19	6.6	7.2	1.01755	0.62664	0.39091
YKR090W	PXL1	6.63	6.67	7.2	7	0.037936	-0.18321	0.221146		7.265	6.73	7.2	6.9	-0.53963	-0.30709	-0.232542
YHL033C	RPL8A	12.33	11.83	10.9	10.1	-0.50057	-0.81761	0.317041		11.888	11.56	10.9	10.2	-0.33112	-0.65711	0.325989
YOL043C	NTG2	3.23	2.85	6.1	5.9	-0.379715	-0.16004	-0.219678		3.57	4.27	6	6.7	0.70315	0.77014	-0.066988
YBR078W	ECM33	12.7	12.34	11.5	11	-0.366642	-0.54563	0.178987		12.814	11.17	11.6	10.1	-1.64239	-1.5184	-0.123991
YLR248W	RCK2	8.65	8.4	8.3	8.2	-0.244374	-0.12512	-0.119252		8.547	8.4	8.2	8.2	-0.14962	-0.08534	-0.064284
YBR246W	RRT2	5.98	5.79	7.2	7.2	-0.192723	0.02075	-0.213469		6.149	6.36	7.1	7	0.21431	-0.02891	0.24322
YLR187W	SKG3	7.48	7.37	5.2	5.7	-0.111368	0.54726	-0.658623		7.269	7.44	5.6	5.7	0.17119	0.13236	0.038833
YLR086W	SMC4	7.02	7.39	7.4	7.7	0.374923	0.29087	0.0840489		7.036	7.14	5.8	7.3	0.10573	1.46809	-1.36235
YJR008W		5.78	5.97	6.6	6.6	0.197013	0.00183	0.195186		5.572	7.25	6.6	7.1	1.67701	0.46774	1.20927
YKL201C	MNN4	6.23	6.03	6.8	6.9	-0.199849	0.11905	-0.318895		7.59	7.2	5.9	6.8	-0.39271	0.89694	-1.28965
YFR004W	RPN11	8.19	8.03	8.2	8	-0.158128	-0.14672	-0.0114033		8.547	8.28	7.8	7.5	-0.26419	-0.30808	0.04389
YPR042C	PUF2	7.37	7.73	6.3	6.2	0.36047	-0.10923	0.469703		7.512	8.28	5.9	6.2	0.76822	0.2863	0.481924
YHR183W	GND1	11.67	11.57	9.9	9.6	-0.100797	-0.28986	0.189063		11.517	10.82	9.7	8.7	-0.69527	-0.99063	0.295364
YML104C	MDM1	5.69	6.08	7.6	7.6	0.391083	0.01376	0.377321		5.978	5.55	6.9	7.2	-0.42922	0.33449	-0.763709
YJL165C	HAL5	7	7.63	7.8	8	0.620726	0.28571	0.335021		7.226	7.74	7.5	7.9	0.5118	0.42374	0.088064
YDL012C		7.74	7.19	5.4	5.4	-0.553904	0.00022	-0.554126		8.023	7.75	5.7	5.6	-0.26848	-0.06222	-0.206261
YBR202W	MCM7	7.93	8.56	8.1	8.5	0.636602	0.40054	0.236065		7.843	7.83	7.9	7.7	-0.01458	-0.23914	0.224556
YHR208W	BAT1	11.35	11.04	9.8	9	-0.309139	-0.79179	0.482646		11.023	9.92	9.4	8.2	-1.09944	-1.15869	0.059246
YFR040W	SAP155	7.52	7.56	7.1	7.7	0.041113	0.66108	-0.619966		7.485	7.4	6.7	7.6	-0.08853	0.90476	-0.993292
YPR006C	ICL2	5.62	6.66	5.4	5.8	1.03762	0.39092	0.646693		6.109	6.89	5.9	5.7	0.77948	-0.19999	0.979468
YER025W	GCD11	10.66	10.4	9.1	9.1	-0.25871	-0.04614	-0.21257		10.178	9.35	8.8	8.6	-0.82895	-0.23449	-0.594457
YNL339C	YRF1-6	9.53	10.72	11.6	12	1.1842	0.37916	0.805037		8.383	10.12	11.7	11.7	1.73341	0.00925	1.72416
YKL003C	MRP17	5.61	5.56	5.5	5.4	-0.046644	-0.14346	0.0968121		5.997	6.25	5.5	5.6	0.25107	0.13754	0.113525
YDR204W	COQ4	7.08	7.28	6.7	6.6	0.206998	-0.16168	0.368681		7.517	7.85	7.4	7.4	0.3297	-0.05308	0.382777
YGL186C	TPN1	8.23	7.68	8.4	8.1	-0.547692	-0.27768	-0.27001		7.9	8.16	8.3	8.5	0.25884	0.13048	0.128361
YNR048W		5.03	5.22	6	6.1	0.188597	0.14558	0.0430134		5.292	5.38	6.1	5.9	0.09267	-0.22966	0.322333
YPR107C	YTH1	5.89	5.4	6.3	6	-0.48869	-0.24693	-0.241765		6.067	6.12	6.8	6.5	0.05795	-0.22565	0.283604
YPL268W	PLC1	4.89	5.62	6.9	7.1	0.731281	0.28888	0.442403		4.686	5.69	6.5	7	1.0044	0.52141	0.482991
YNL125C	ESBP6	6.21	6.94	7.6	8	0.732182	0.40438	0.327803		6.21	7.03	7.5	7.6	0.82107	0.10703	0.714038
YOL007C	CSI2	7.3	6.36	7	5.9	-0.937106	-1.05318	0.116072		7.708	5.62	6.9	5.7	-2.09167	-1.18258	-0.909092
YOR368W	RAD17	5.27	5.28	5.3	5.5	0.010458	0.17638	-0.165917		5.454	5.25	5.4	5.2	-0.20848	-0.19046	-0.018023
YBR145W	ADH5	5.4	3.88	6.2	5.9	-1.52754	-0.30531	-1.22223		5.192	4.16	6	5.8	-1.03291	-0.20824	-0.824673
YBL028C		6.88	6.43	6.2	6	-0.450183	-0.13479	-0.315397		6.619	6.47	6	6.4	-0.14972	0.38797	-0.537695
YGR162W	TIF4631	10.49	10.05	9.3	9.1	-0.447208	-0.20133	-0.245874		9.235	9.05	8.9	9.2	-0.18323	0.23692	-0.420151
YOR269W	PAC1	4.84	5.69	6.6	6.9	0.84755	0.35636	0.491188		5.294	4.86	6.7	6.3	-0.43385	-0.44654	0.012687
YMR033W	ARP9	7.54	7.27	7.8	7.5	-0.276863	-0.25635	-0.0205092		7.318	6.98	7.4	7.3	-0.33376	-0.16114	-0.172623
YML041C	VPS71	5.34	5.73	6	6.4	0.385441	0.38066	0.0047778		5.743	6.28	6.2	6.4	0.53834	0.25945	0.27889
YJL020C	BBC1	9.94	9.48	8.1	8.2	-0.462882	0.04242	-0.505304		9.87	9.51	8	8.1	-0.36025	0.06524	-0.425485
YPL175W	SPT14	5.6	6.3	6.5	7.1	0.703352	0.63423	0.0691193		5.539	6.18	6.7	7.2	0.64265	0.49682	0.145827
YJL121C	RPE1	9	9.44	8.3	8.2	0.438687	-0.08094	0.519629		9.349	9.07	8.6	7.9	-0.2752	-0.67935	0.404148
YHR143W-A	RPC10	7	7.17	7	6.9	0.166679	-0.14537	0.312049		7.2	7.34	7.5	7.4	0.1403	-0.09873	0.239032
YIL023C	YKE4	6.73	7.39	7.5	7.9	0.662323	0.40518	0.257145		6.902	7.4	8	8.3	0.49996	0.22978	0.270176
YJL200C	ACO2	8.58	8.34	8.2	8	-0.235406	-0.26204	0.0266365		8.643	8.43	8.6	8.9	-0.21506	0.22709	-0.442158
YDR262W		7.22	7.26	7.2	7.3	0.037903	0.1279	-0.0899981		7.182	8.18	7.7	7.6	0.99574	-0.03149	1.02723
YDR464W	SPP41	7.05	7.23	7.3	7.5	0.181349	0.23522	-0.0538755		6.757	7.37	7	7.8	0.61078	0.76946	-0.15868
YGR041W	BUD9	6.01	5.51	6.9	6.2	-0.504592	-0.64376	0.139167		5.886	5.17	6.9	6.3	-0.7129	-0.57085	-0.142052
YDR060W	MAK21	9.18	9.08	8.7	8.9	-0.098061	0.26929	-0.367352		8.766	8.2	7.9	8.9	-0.56846	1.02889	-1.59735
YDR363W	ESC2	5.03	4.71	6	6.4	-0.328899	0.394	-0.722904		4.884	5.54	5.7	6.1	0.65598	0.4379	0.218084
YGR140W	CBF2	6.87	6.58	6.8	7.1	-0.292112	0.29343	-0.585542		6.589	6.33	6.8	6.4	-0.2547	-0.41321	0.158511
YCR097W	HMRA1	6.31	7.17	6.9	6.8	0.867787	-0.0989	0.966688		6.538	7.48	6.5	6.9	0.94363	0.31429	0.629346
YOL124C	TRM11	7.2	7.28	7.5	7.2	0.086971	-0.24908	0.336056		7.224	6.93	7.6	7.7	-0.29676	0.04888	-0.345642
YDR161W		7.33	7.36	7.8	7.6	0.037938	-0.23924	0.277174		7.247	7.03	8	8	-0.21641	-0.06948	-0.14693
YOR386W	PHR1	6.17	5.95	5.7	6	-0.216989	0.36831	-0.585303		5.543	6.55	5.6	6.2	1.00419	0.57347	0.430721
YBR022W	POA1	5.72	5.6	5.7	5.7	-0.12007	0.06386	-0.183928		6.121	5.97	6	5.5	-0.15432	-0.43887	0.28455
YCL029C	BIK1	6.12	5.91	6	6.3	-0.209318	0.32681	-0.536126		5.788	5.55	6.1	6.1	-0.23505	0.04876	-0.283814
YKL021C	MAK11	7.73	8	7.6	7.5	0.264883	-0.06865	0.333529		7.459	7.63	7.1	7.2	0.17169	0.1158	0.055884
YPL149W	ATG5	4.26	4.39	6.4	6.9	0.128451	0.49518	-0.366731		5.104	5	7	7.3	-0.10282	0.2372	-0.340021
YPL048W	CAM1	10.76	10.74	9.1	9	-0.029584	-0.14693	0.117345		10.8	10.5	9.3	8.8	-0.2972	-0.5749	0.277704
YJL147C		4.4	4.92	5.9	5.5	0.52671	-0.3851	0.911809		5.26	5.34	6.4	6.5	0.08044	0.18565	-0.105217
YML126C	ERG13	11.07	10.32	8.5	8.1	-0.755009	-0.40625	-0.348754		10.967	9.64	8.2	7.7	-1.32582	-0.48586	-0.83996
YNL305C		7.15	7.92	7.4	7.7	0.767073	0.27403	0.493046		7.96	8.38	7.9	7.4	0.41961	-0.48572	0.905329
YAR003W	SWD1	5.91	5.85	7	7.1	-0.054913	0.1523	-0.207211		5.779	5.23	7	7.3	-0.55042	0.22251	-0.772922
YBL082C	ALG3	7.24	6.54	7.1	6.9	-0.698594	-0.20629	-0.492301		6.783	5.63	7.1	6.6	-1.15763	-0.54478	-0.612854
YKL065C	YET1	8.55	8.71	8.3	8.4	0.160597	0.11056	0.0500364		8.361	8.9	8.5	8.8	0.54213	0.34425	0.197878
YDR226W	ADK1	11.09	10.69	9.8	9	-0.404209	-0.76142	0.357207		11.132	10.74	9.8	9	-0.38826	-0.84236	0.454105
YML081C-A	ATP18	6.92	8.18	6.5	6.3	1.26129	-0.17477	1.43606		7.492	7.93	6.6	6.3	0.43932	-0.27335	0.712663
YER007W	PAC2	4.34	5.08	5.9	5.7	0.734444	-0.25191	0.986354		5.036	4.99	5.7	6.1	-0.0453	0.37557	-0.420864
YPL084W	BRO1	8.2	7.64	7.5	7.5	-0.558272	-0.01033	-0.547942		8.009	7.97	7.1	7.5	-0.03478	0.39781	-0.432589
YKL164C	PIR1	11.17	11.3	10	9.7	0.135456	-0.26394	0.399395		11.089	11.01	10.2	9.7	-0.07511	-0.44998	0.37487
YGR243W	FMP43	4.01	5.3	4.9	7.4	1.29003	2.50666	-1.21663		4.733	6.45	5.3	7.5	1.71532	2.14668	-0.431361
YMR186W	HSC82	13.97	12.53	11.8	10.4	-1.43569	-1.42847	-0.0072146		14.715	13.01	12.1	10.6	-1.70743	-1.50351	-0.203923
YDR420W	HKR1	7.67	9.94	7.4	8	2.26999	0.61759	1.6524		7.436	9.32	7.1	7.5	1.8827	0.34611	1.53659
YCR089W	FIG2	4.77	6.66	6.3	6.9	1.89203	0.60818	1.28385		4.211	7.19	6.8	7.7	2.97572	0.93446	2.04126
YDL048C	STP4	5.39	7.61	5.8	7.7	2.21517	1.81667	0.398504		5.573	6.17	6.2	6.6	0.59608	0.41887	0.177206
YMR087W		5.26	5.39	5.8	5.4	0.132235	-0.42368	0.555918		6.342	5.9	6	4.9	-0.43744	-1.06722	0.629782
YOR085W	OST3	9.04	8.93	7.4	7.4	-0.109236	0.00148	-0.110719		8.805	8.11	7.3	6.7	-0.69703	-0.51943	-0.177604
YIL067C		5.74	6.5	6.9	7.1	0.75893	0.15455	0.604385		6.009	6.31	7.1	7.1	0.30378	-0.03864	0.342413
YLL040C	VPS13	9.61	9.16	7.9	8.2	-0.444577	0.36232	-0.806901		9.449	8.72	7.7	7.8	-0.73141	0.085	-0.816402
YJL002C	OST1	9.9	9.51	9.3	8.8	-0.389138	-0.46449	0.0753567		9.707	8.34	9	8.3	-1.36725	-0.73632	-0.630928
YNL240C	NAR1	6.06	6.78	6.6	7.2	0.72511	0.67541	0.0496962		5.659	6.56	7.3	7.6	0.89651	0.35096	0.545551
YPR060C	ARO7	7.68	7.3	7.4	7.2	-0.379564	-0.27012	-0.109443		7.621	7.23	7.9	7.2	-0.39082	-0.64337	0.252546
YJL103C	GSM1	2.63	4.29	4.8	6.2	1.65785	1.35826	0.299592		3.881	4.17	4.8	5.6	0.2842	0.8411	-0.556899
YPR161C	SGV1	7.49	7.39	7.4	7.6	-0.091868	0.2496	-0.341468		6.997	7.28	7.8	7.9	0.28585	0.10569	0.180163
YLR310C	CDC25	7.84	8.41	8.3	8.7	0.571526	0.4054	0.166127		7.268	7.65	7.4	8	0.38441	0.59209	-0.207676
YPL176C	TRE1	7.83	7.82	7.7	8	-0.00115	0.30778	-0.308927		7.694	7.89	7.5	8	0.19909	0.45092	-0.251832
YER038C	KRE29	3.66	3.57	5.4	5.9	-0.081406	0.51172	-0.593126		3.717	5.08	5.9	6.3	1.36769	0.37488	0.992804
YDL099W	BUG1	7.24	6.7	6.7	6.4	-0.54229	-0.27403	-0.268262		7.084	6.75	6.2	6.6	-0.32944	0.39393	-0.723367
YGL012W	ERG4	10.22	10.2	9.4	9.2	-0.024862	-0.27954	0.254676		10.192	9.56	9	8.6	-0.62748	-0.45839	-0.16909
YKL096W	CWP1	10.7	8.81	8.8	6.9	-1.88851	-1.89424	0.0057314		11.501	10.37	8.8	7.6	-1.13444	-1.20202	0.067574
YMR311C	GLC8	7.51	7.1	7	7	-0.401465	-0.03223	-0.369234		7.705	7.63	7	6.9	-0.07016	-0.08842	0.018253
YKR072C	SIS2	7.51	7.21	7.5	7.5	-0.298976	0.05195	-0.350928		7.288	7.39	7.6	7.9	0.09889	0.2609	-0.162005
YIR034C	LYS1	7.75	7.77	6.9	6.9	0.020669	-0.00055	0.0212156		8.204	8.46	7.5	7.9	0.26077	0.4353	-0.174531
YGL254W	FZF1	4.7	5.22	5.4	5.8	0.52362	0.39199	0.131632		5.474	6.22	6.1	6.1	0.74853	0.03983	0.708695
YDL132W	CDC53	8.4	8.1	8.4	7.9	-0.296234	-0.47792	0.181686		8.321	7.95	8.1	7.7	-0.37569	-0.41687	0.041176
YDR390C	UBA2	7.35	7.24	8	8	-0.106155	-0.03061	-0.0755499		7.566	7.23	8	7.7	-0.3394	-0.3239	-0.015502
YOR076C	SKI7	6.32	6.41	7.1	7.2	0.092721	0.12116	-0.028444		6.596	6.67	7	7.1	0.07635	0.09511	-0.01876
YLR277C	YSH1	6.65	6.53	7.7	8	-0.122047	0.37123	-0.493281		6.604	6.62	7.8	7.6	0.01476	-0.20064	0.215404
YOL092W		8.78	8.93	8	8	0.155054	0.01179	0.143267		8.454	8.26	7.8	7.6	-0.18927	-0.24474	0.055472
YMR157C	AIM36	5.83	5.96	6.4	6	0.135495	-0.35467	0.490163		6.065	5.58	6.8	6.5	-0.48332	-0.26039	-0.222931
YDR479C	PEX29	5.78	6.25	6.9	7.2	0.464889	0.3456	0.119284		6.062	6.16	6.8	6.8	0.10154	0.02407	0.077472
YOR155C	ISN1	6.89	6.78	7.2	6.7	-0.109304	-0.49457	0.385262		7.076	6.74	7.2	7.1	-0.3317	-0.15366	-0.178039
YLR398C	SKI2	8.5	8.13	7.7	7.9	-0.37304	0.20925	-0.582294		7.975	8.1	7.2	7.7	0.12127	0.47383	-0.352561
YGL210W	YPT32	6.78	6.9	6.7	6.5	0.121229	-0.18545	0.306683		6.568	6.43	7.5	7.4	-0.13933	-0.12925	-0.010079
YJL097W	PHS1	8.38	8.4	7.5	7	0.013527	-0.49894	0.512472		8.681	8.15	7.6	6.4	-0.53334	-1.12423	0.590889
YDR192C	NUP42	6.6	6.46	6.1	6.4	-0.140028	0.36369	-0.503721		7.002	6.71	6.2	6	-0.28829	-0.13747	-0.150827
YPL011C	TAF3	6.13	6.25	6.8	7	0.115911	0.19477	-0.0788636		6.045	6.39	6.9	7.4	0.3491	0.55712	-0.208014
YDR005C	MAF1	6.34	5.89	7.1	7.1	-0.454165	-0.00607	-0.448097		5.9	6.09	7	7	0.19444	-0.02448	0.218922
YJR073C	OPI3	10.05	9.14	9.6	8.5	-0.910616	-1.15065	0.240032		8.838	8.71	8.6	7.9	-0.12458	-0.63892	0.514342
YOR357C	SNX3	6.76	6.36	6.7	6	-0.403757	-0.71504	0.311282		6.799	7.32	6.8	7.1	0.52329	0.32414	0.199153
YKR036C	CAF4	5.93	6.46	7	7.2	0.538002	0.22601	0.311988		5.746	6.29	6.9	7.1	0.54376	0.21595	0.327811
YDR500C	RPL37B	11.03	10.81	10.3	9.9	-0.22134	-0.42717	0.205832		10.803	10.52	10.5	10	-0.2809	-0.47482	0.193917
YDL176W		5.25	5.7	6.9	7.1	0.445871	0.19093	0.25494		5.314	5.95	7	7.2	0.63335	0.1874	0.445944
YMR074C		7.67	7.65	7.7	7.2	-0.020119	-0.48048	0.46036		7.63	7.59	7.7	7.3	-0.03693	-0.32163	0.284694
YLR233C	EST1	3.61	3.62	6.2	6.4	0.011756	0.19596	-0.184203		3.584	4.73	6	5.6	1.1505	-0.46731	1.61781
YPL099C	AIM43	5.56	5.06	5.3	4.7	-0.504758	-0.5669	0.0621439		5.369	5.1	5	5.1	-0.27319	0.04646	-0.319659
YGR119C	NUP57	8.01	8.13	8.6	8.5	0.127592	-0.0959	0.223495		7.984	7.73	8.7	8.7	-0.25617	0.04892	-0.305095
YGR238C	KEL2	4.94	5.99	6.3	5.9	1.0457	-0.40258	1.44828		4.916	5.22	5.6	5.4	0.30133	-0.27481	0.576141
YLR354C	TAL1	11.14	10.9	9.9	9.5	-0.238709	-0.44235	0.203636		11.131	10.83	9.8	9	-0.29612	-0.82807	0.531953
YNL162W	RPL42A	11.7	11.57	10.8	10.3	-0.132487	-0.53045	0.397962		11.545	11.34	10.6	10	-0.2047	-0.65085	0.446156
YDR039C	ENA2	9.36	9.03	9	9.1	-0.335976	0.12135	-0.457324		9.1	9.07	9.1	9.2	-0.03398	0.07723	-0.11121
YLR130C	ZRT2	8.7	8.68	9.5	9.6	-0.022315	0.04339	-0.0657097		7.008	7.09	9.2	9.5	0.08324	0.31242	-0.229179
YDR219C	MFB1	6.68	6.55	6.8	6.9	-0.131496	0.07152	-0.203014		6.903	6.84	6.6	6.7	-0.06667	0.12856	-0.195224
YMR131C	RRB1	8.76	8.95	8.8	8.9	0.190792	0.0711	0.119693		8.304	7.98	8.9	9	-0.31942	0.10468	-0.424098
YNL192W	CHS1	8.62	8.68	9.2	9.5	0.055114	0.2401	-0.184985		8.061	8.59	8.8	9.5	0.52922	0.68865	-0.159426
YER139C	RTR1	5.16	4.98	5.6	5.9	-0.17868	0.26848	-0.447157		5.285	5.61	6	5.9	0.32504	-0.04901	0.374054
YPL077C		4.41	4.53	4.8	5	0.112044	0.23793	-0.125885		4.859	4.89	5.1	5.3	0.0292	0.18634	-0.157139
YGL113W	SLD3	5.24	5.04	6.2	6.3	-0.194253	0.02415	-0.218405		4.456	4.96	6.4	6.3	0.49965	-0.06047	0.560122
YIL159W	BNR1	5.86	6.28	6.5	6.7	0.419552	0.20198	0.21757		5.858	6.06	5.8	6.9	0.20151	1.09035	-0.888841
YNR055C	HOL1	7.29	6.43	8.4	8.3	-0.863127	-0.15174	-0.71139		7.371	7.2	8.5	8.5	-0.17432	0.07709	-0.251407
YOR010C	TIR2	2.15	1.84	5.4	5.4	-0.313179	-0.02182	-0.291358		3.023	2.04	5.4	5.4	-0.98021	0.01784	-0.998047
YHR053C	CUP1-1	9.19	8.32	8.5	8	-0.870001	-0.53678	-0.333225		10.133	10.64	10.2	10.6	0.50453	0.42794	0.076583
YKR014C	YPT52	8.01	7.62	7.5	7	-0.394703	-0.54068	0.145972		8.083	8.02	7.5	7.3	-0.06217	-0.16409	0.101914
YDL154W	MSH5	-0.81	1.58	5.3	5.4	2.39498	0.06463	2.33034		1.633	2.27	5.1	4.1	0.63426	-1.01033	1.64459
YOL127W	RPL25	12.56	12.48	11.4	10.8	-0.080984	-0.51984	0.438857		12.196	12.08	10.9	10.3	-0.11794	-0.65282	0.534881
YPL110C	GDE1	7.05	7.48	6.8	7.1	0.426992	0.3017	0.12529		7.276	8.14	6.8	7.6	0.86484	0.81934	0.0455
YOR256C	TRE2	6.7	7.1	7.5	7.4	0.404888	-0.06426	0.46915		6.749	7.02	7	7.2	0.26969	0.19465	0.07504
YLR453C	RIF2	3.68	4.92	5.2	5.6	1.23942	0.42386	0.815554		3.925	5.4	4.5	5.1	1.47161	0.51153	0.960077
YOR098C	NUP1	8.45	8.04	8.3	8.3	-0.410756	0.01217	-0.422931		8.195	7.85	8.4	8.3	-0.34107	-0.14213	-0.198943
YML024W	RPS17A	12.09	12.28	11.3	10.8	0.192229	-0.5282	0.720431		11.887	11.9	11	10.1	0.01346	-0.86408	0.877543
YBR059C	AKL1	8.59	8.62	7.7	7.8	0.02297	0.14645	-0.123476		8.377	8.54	7.4	7.8	0.16144	0.40752	-0.246076
YOR375C	GDH1	11.24	11.51	9.5	9.9	0.271262	0.46797	-0.196712		10.322	9.29	8.5	7.6	-1.03022	-0.96472	-0.065501
YKL078W	DHR2	6.45	6.66	6.3	6.8	0.215316	0.44686	-0.231546		5.82	5.88	6.9	7.2	0.0598	0.31832	-0.258514
YNL039W	BDP1	6.54	6.81	7.2	7.3	0.272066	0.10137	0.170695		6.822	6.83	7.1	7.3	0.01114	0.21908	-0.207943
YPL154C	PEP4	10.98	11.11	9.5	9.3	0.137743	-0.19815	0.335896		10.994	11.11	9.6	9.2	0.11788	-0.37701	0.49489
YNR011C	PRP2	6.33	5.95	6.8	6.9	-0.380459	0.15902	-0.539475		6.094	6.34	6.8	7.3	0.24174	0.49802	-0.256284
YGL157W	ARI1	8.5	8.34	7.6	7.4	-0.150851	-0.24445	0.0935985		8.755	8.62	7.7	7.2	-0.13287	-0.41534	0.282476
YOL038W	PRE6	8.94	8.61	8.4	8.1	-0.331601	-0.2887	-0.0429041		8.916	8.63	8.2	7.7	-0.28558	-0.48707	0.20149
YJR136C	TTI2	4.88	5.32	6.7	6.7	0.435857	0.06352	0.372332		5.103	5.39	6.4	6.4	0.29234	-0.0203	0.312636
YCL034W	LSB5	7.46	7.58	7.9	7.8	0.124989	-0.17498	0.299965		7.669	7.7	8.4	7.6	0.02938	-0.78222	0.811599
YEL032W	MCM3	8.22	8.38	8.1	8.5	0.161596	0.42149	-0.259897		7.709	7.78	7.9	7.9	0.06843	-0.01479	0.08323
YML119W		6.66	7.28	7.1	7.9	0.621354	0.7433	-0.121947		6.876	6.86	7.7	7.5	-0.01356	-0.14158	0.128019
YMR056C	AAC1	2.48	4.86	5.2	6	2.38451	0.76635	1.61816		3.882	4.81	5.9	6.2	0.92329	0.27507	0.648225
YJL001W	PRE3	8.48	8.1	8.3	7.8	-0.381943	-0.48963	0.107689		8.502	8.46	8.3	7.3	-0.04202	-1.02678	0.984762
YBR095C	RXT2	5.98	6.03	6.8	6.9	0.049449	0.1432	-0.0937465		6.364	6.32	6.5	6.9	-0.04873	0.39616	-0.444889
YLR376C	PSY3	3.42	3.81	5.4	5.7	0.391928	0.33296	0.0589692		3.837	4.1	5.6	5.1	0.26088	-0.46445	0.72534
YDR497C	ITR1	10.87	10.26	10.9	10.3	-0.609628	-0.62492	0.0152924		10.106	9.47	10.2	9.5	-0.63579	-0.71352	0.077736
YDR309C	GIC2	8.58	8.35	8.2	7.9	-0.232832	-0.25279	0.0199562		8.821	8.93	8.4	8	0.11051	-0.37103	0.481539
YPR183W	DPM1	9.75	10.03	8.2	8.1	0.281865	-0.10045	0.382312		9.675	9.69	8	7.6	0.01941	-0.34792	0.367332
YPL264C		4.8	4.45	5.3	5.1	-0.344174	-0.19384	-0.150331		4.9	5.48	5.1	5.5	0.57478	0.37323	0.201556
YMR021C	MAC1	5.74	5.8	6.2	6.9	0.059493	0.68227	-0.622781		5.84	6.5	6.1	6.9	0.6613	0.79576	-0.134462
YPL167C	REV3	2.63	4.05	6.7	6.8	1.42118	0.14133	1.27985		3.455	4.88	6.1	6.6	1.42182	0.45918	0.962635
YMR120C	ADE17	8.31	8.81	10.2	9	0.493566	-1.1433	1.63686		7.79	10.49	9.2	10.7	2.70081	1.5846	1.11621
YER029C	SMB1	6.27	6.45	5.7	5.8	0.182655	0.06861	0.114049		6.058	6.45	5.8	6	0.3967	0.1114	0.285299
YIL049W	DFG10	5.04	6.03	5.5	5.3	0.983279	-0.17996	1.16324		5.645	5.61	5.5	4.9	-0.03314	-0.629	0.595854
YKR063C	LAS1	5.28	5.97	6.6	6.9	0.683498	0.26108	0.422417		5.321	6.1	6.2	7.3	0.77423	1.09501	-0.320778
YAL041W	CDC24	7.72	7.79	7.9	8.1	0.0736	0.11809	-0.04449		7.806	8.05	7.9	8.4	0.2484	0.55866	-0.310253
YBL024W	NCL1	9.43	9.3	8.4	8.4	-0.125823	-0.00445	-0.121377		8.898	8.67	8.5	8.4	-0.2305	-0.05861	-0.171893
YDL123W	SNA4	5.72	6.41	5.3	5.5	0.688519	0.18849	0.50003		6.358	6.53	5.3	5.4	0.17296	0.11326	0.0597
YGL245W	GUS1	11.88	11.76	10.3	10	-0.125446	-0.24473	0.119282		11.635	11.34	10.1	9.7	-0.29989	-0.39119	0.091292
YDL022W	GPD1	10.43	10.39	8.9	8.6	-0.046786	-0.32219	0.275409		11.518	10.98	8.9	7.7	-0.53722	-1.118	0.580781
YLR389C	STE23	8.53	8.76	7.7	7.9	0.231415	0.12248	0.108935		8.338	7.79	7.4	7.3	-0.54362	-0.10607	-0.437558
YOR166C	SWT1	4.88	5.08	6.1	6.3	0.198664	0.20317	-0.0045079		5.507	5.78	5.8	6.3	0.26794	0.48124	-0.213295
YOL083W	ATG34	4.58	4.75	5.6	5.9	0.176268	0.28304	-0.106768		4.677	5.5	5.9	5.7	0.82589	-0.25139	1.07728
YLR147C	SMD3	4.92	5.63	5.3	4.9	0.711981	-0.39042	1.1024		5.709	5.99	5.7	5.8	0.28377	0.07493	0.208837
YLR442C	SIR3	6.55	6.52	6.9	7.4	-0.029522	0.54965	-0.579168		6.572	6.62	6	7.1	0.04385	1.13072	-1.08687
YOR067C	ALG8	8.38	8.05	7.8	7.4	-0.322569	-0.3948	0.0722271		8.078	7.02	7.5	7.2	-1.05406	-0.34386	-0.710193
YLR046C		-0.81	1.27	6.1	5.9	2.08096	-0.16676	2.24772		-28.787	1.46	6.4	6.1	30.2445	-0.30975	30.5542
YNL129W	NRK1	5.69	5.98	6.6	6	0.289419	-0.63944	0.928861		5.841	6.01	6	6.3	0.16816	0.37391	-0.205748
YLR288C	MEC3	4.17	4.77	6.3	6.2	0.595322	-0.08165	0.676969		4.995	5.64	6.4	6.3	0.64676	-0.14275	0.789501
YCR031C	RPS14A	12.54	12.45	11.1	10.8	-0.082306	-0.3425	0.260195		12.235	12.35	11.2	10.6	0.11585	-0.65184	0.767691
YPL123C	RNY1	6.42	6.4	6.2	5.7	-0.022159	-0.42196	0.399797		6.894	7.35	6	5.6	0.45459	-0.38662	0.841213
YML081W		6.36	7.31	7.8	8	0.95476	0.27046	0.684302		6.366	6.35	7.3	7.5	-0.01199	0.20881	-0.220802
YGL047W	ALG13	5.97	6.03	6.2	5.4	0.059696	-0.75581	0.815507		6.39	6.53	6.4	5.7	0.13529	-0.69226	0.827549
YJR004C	SAG1	3.96	4.29	6.4	6.6	0.333343	0.20703	0.126312		2.061	4.5	6.4	6.6	2.43824	0.14316	2.29507
YHR107C	CDC12	8.7	8.21	7	6.9	-0.491489	-0.02138	-0.470107		8.872	7.91	7.1	6.6	-0.95953	-0.4421	-0.517437
YDL066W	IDP1	10.6	10.08	9.1	8.6	-0.519581	-0.49351	-0.0260737		10.46	9.31	8.9	8.3	-1.15064	-0.6207	-0.529934
YBL060W	YEL1	4.89	5.64	6.7	7.3	0.749689	0.57253	0.177159		5.399	5.58	6.8	7.7	0.1775	0.93959	-0.762092
YMR164C	MSS11	6.28	6.57	6.2	6.3	0.288792	0.05778	0.231016		6.08	6.42	5.7	6.3	0.34462	0.64515	-0.300528
YDR486C	VPS60	6.83	7.52	6.5	6.5	0.692531	0.05025	0.642276		7.161	7.51	6.7	6.8	0.34411	0.08711	0.257005
YLR103C	CDC45	5.9	5.4	6.9	6.8	-0.502854	-0.10509	-0.397763		5.78	5.01	6.7	6.4	-0.76825	-0.28223	-0.48602
YGR229C	SMI1	8.85	8.32	8.4	8.1	-0.524178	-0.24434	-0.279839		8.723	7.97	7.3	8	-0.74966	0.75957	-1.50923
YML017W	PSP2	8.52	8.2	7.1	7.1	-0.319325	0.01009	-0.329416		8.566	8.25	7.4	7.2	-0.31846	-0.20172	-0.116731
YOR320C	GNT1	7.37	7.25	8	7.4	-0.120036	-0.65192	0.531883		7.797	7.33	7.9	7.4	-0.46514	-0.46109	-0.004046
YLR002C	NOC3	7.61	7.61	7.8	8.1	0.005029	0.27577	-0.27074		7.54	7.79	7.5	8	0.25054	0.53249	-0.281958
YBR185C	MBA1	6.62	6.32	6.3	6	-0.295355	-0.29382	-0.0015376		6.688	6.17	6.6	6.2	-0.514	-0.39597	-0.118023
YML108W		5.46	5.62	4.9	4.9	0.152409	-0.02088	0.17329		5.785	5.8	5.2	5.3	0.01626	0.06793	-0.051667
YOR023C	AHC1	6.53	7.36	7	7.2	0.828232	0.13632	0.691914		7.011	7.59	7	7.5	0.57517	0.49155	0.083624
YLR244C	MAP1	9.9	9.49	9.1	8.8	-0.407972	-0.2693	-0.13867		9.81	9.4	9.5	9.2	-0.41017	-0.30532	-0.104849
YJL177W	RPL17B	11.64	11.39	10.4	9.8	-0.249313	-0.51273	0.263413		11.296	11	10.4	10	-0.2961	-0.43318	0.137079
YOR221C	MCT1	6.61	7.18	6.7	6.8	0.565031	0.1299	0.43513		6.918	7.77	7.3	8	0.85328	0.70305	0.150228
YNR066C		3.69	5.86	5	6.1	2.17508	1.13322	1.04186		3.845	6.41	5	6.1	2.56668	1.10212	1.46456
YLR020C	YEH2	6.84	6.72	7.4	7.3	-0.119782	-0.05709	-0.0626949		6.844	6.03	7.2	7.1	-0.8108	-0.02321	-0.787593
YPL246C	RBD2	8.52	8.52	8	7.8	-0.001239	-0.15531	0.154071		8.255	7.84	8	7.5	-0.41837	-0.49914	0.080768
YLR222C	UTP13	8.35	8.31	8.1	8.3	-0.036791	0.21305	-0.249841		7.937	8.05	7.9	8.5	0.11428	0.63199	-0.517712
YHL048W	COS8	7.53	7.86	7.2	7.7	0.329073	0.47618	-0.147103		7.599	7.9	7.3	7.4	0.29902	0.14592	0.153099
YNL082W	PMS1	6.8	6.54	7	6.7	-0.256306	-0.30149	0.0451796		6.415	6.37	6.2	6.7	-0.04115	0.57661	-0.617755
YLR121C	YPS3	6.52	8.15	5.7	7.4	1.635	1.67675	-0.0417527		7.36	7.71	6.2	7	0.34536	0.73973	-0.394374
YDR028C	REG1	8.22	8.37	8.6	8.6	0.156697	-0.04724	0.203935		8.288	8.36	7.9	8.5	0.07654	0.57947	-0.502924
YMR102C		6.42	7.12	7.6	8.2	0.704887	0.55531	0.149572		6.742	6.8	7.1	7.4	0.06125	0.28191	-0.220661
YLR323C	CWC24	5.06	5.08	5.5	5.6	0.01374	0.15122	-0.137476		4.765	5.59	6.1	5.9	0.82106	-0.2023	1.02336
YGR009C	SEC9	7.57	7.7	7.6	7.3	0.125146	-0.24977	0.374915		7.43	7.71	6.8	7.5	0.27503	0.65173	-0.376706
YOR100C	CRC1	1.17	2.72	3.2	4.8	1.54907	1.62866	-0.0795902		2.589	4.81	5.3	5.8	2.21968	0.525	1.69468
YHR024C	MAS2	7.75	7.25	7.2	7.3	-0.498985	0.06075	-0.559733		7.366	7.45	7.6	7.7	0.07916	0.10691	-0.027751
YGR180C	RNR4	11.02	11.15	9.4	9.3	0.130969	-0.10192	0.232891		11	10.6	9.8	8.9	-0.40249	-0.91968	0.517185
YER083C	GET2	8.12	8.14	7.5	7.4	0.020798	-0.05325	0.0740461		8.167	8	7.7	7.5	-0.16775	-0.21645	0.048698
YGR081C	SLX9	6.96	6.43	6.7	6.6	-0.523257	-0.1111	-0.412155		6.711	6.76	6.5	6.9	0.04474	0.40953	-0.364797
YDL202W	MRPL11	6.65	6.26	6.5	6.4	-0.386356	-0.01421	-0.372151		6.477	6.23	6.2	6.4	-0.24833	0.21894	-0.467273
YKL069W		7.13	6.68	6	6.1	-0.449294	0.02712	-0.476411		7.258	6.52	6.8	6.2	-0.73414	-0.6533	-0.080831
YJR062C	NTA1	6.14	6.71	6.7	6.7	0.571526	-0.00673	0.57826		6.237	7.11	6.7	6.8	0.87218	0.10102	0.771157
YPL202C	AFT2	5.84	6.28	6.9	7	0.445368	0.15844	0.286923		6.106	6.38	7.2	7.3	0.27053	0.06504	0.205485
YNR022C	MRPL50	6.26	5.58	5.8	5.2	-0.676014	-0.61166	-0.0643523		6.252	5.45	6.1	5.6	-0.79977	-0.51056	-0.289209
YDL189W	RBS1	6.61	7.11	7.2	7.3	0.497547	0.16837	0.329181		6.783	6.76	6.8	7.4	-0.01917	0.61153	-0.630705
YMR300C	ADE4	8.52	8.49	8.9	8.7	-0.033447	-0.22594	0.192492		8.225	9.23	8.3	9.7	1.00634	1.4208	-0.414456
YGR283C		5.71	6.36	6.6	6.8	0.645603	0.17396	0.471639		6.062	6.16	6.6	7	0.09594	0.31106	-0.215119
YGL021W	ALK1	7.62	8.25	8.4	8.6	0.63136	0.12174	0.509624		8.339	7.64	8.4	8	-0.69431	-0.33464	-0.359673
YPL145C	KES1	9.52	9.58	8.4	8.4	0.060747	-0.00657	0.0673201		9.542	9.34	8.1	7.7	-0.19733	-0.42392	0.226589
YHR161C	YAP1801	7.33	7.34	8	8	0.008703	-0.01278	0.0214813		7.192	7.85	8.5	8.5	0.65971	0.04082	0.618892
YJR127C	RSF2	7.51	8.18	8.4	8.5	0.667099	0.09817	0.568928		7.465	7.89	8.5	8.3	0.42587	-0.18759	0.613463
YLL008W	DRS1	8.77	8.61	8	8.4	-0.154663	0.41108	-0.565741		8.197	8.23	8	8.4	0.02922	0.39471	-0.365495
YDR468C	TLG1	6.26	6.15	6.8	6.4	-0.111301	-0.41453	0.303227		6.381	6.96	6.9	6.7	0.5812	-0.18657	0.767767
YOR144C	ELG1	5.45	5.96	6.3	6.2	0.506109	-0.07319	0.579296		5.318	5.9	6.1	6	0.5803	-0.14441	0.724708
YMR146C	TIF34	10.08	9.86	9.1	9	-0.217573	-0.02911	-0.188459		9.665	9.34	8.8	8.5	-0.32025	-0.30771	-0.012542
YNL208W		10.37	10	8.8	8.6	-0.371671	-0.20101	-0.170663		9.892	10.65	9.1	8.5	0.7572	-0.54241	1.29961
YLR266C	PDR8	5.54	4.75	7.2	7.2	-0.795662	0.05133	-0.846996		4.974	5.9	6.9	7.5	0.92717	0.65345	0.273718
YPR129W	SCD6	8.45	7.93	6.8	6.8	-0.524555	-0.03636	-0.488199		8.449	7.89	7.2	6.7	-0.56278	-0.48139	-0.081395
YLR460C		4.35	4.46	5.4	5.7	0.116269	0.25833	-0.142064		2.059	2.63	4.6	5.1	0.57623	0.52263	0.053603
YMR047C	NUP116	8.85	8.61	8.6	8.7	-0.238755	0.07794	-0.316692		8.245	8.21	8.2	8.6	-0.03981	0.42087	-0.460677
YNL309W	STB1	5.42	6.3	6.3	6.1	0.88212	-0.19932	1.08144		6.286	6.14	6.2	6.1	-0.14586	-0.14494	-0.000926
YNL259C	ATX1	6.47	5.98	5.6	5.1	-0.489023	-0.55219	0.0631654		5.785	5.78	4.9	4.6	-0.00524	-0.30485	0.299606
YKL218C	SRY1	5.12	5.83	6.3	6.6	0.707377	0.23198	0.475393		5.692	6.65	6.6	7	0.95771	0.34691	0.610797
YNL097C	PHO23	6.7	6.3	6.5	6.5	-0.403953	0.00777	-0.411721		6.388	6.56	6.8	6.2	0.1761	-0.54361	0.719711
YGR195W	SKI6	7.15	7.16	6.8	6.9	0.014478	0.12127	-0.106794		7.175	7.25	7.3	6.8	0.07836	-0.48035	0.558709
YBR118W	TEF2	16.55	16.7	14.9	14.7	0.147738	-0.19967	0.347412		16.355	16.7	14.7	14.3	0.34481	-0.40299	0.747802
YJR110W	YMR1	5.38	5.66	6.8	6.8	0.282095	0.02076	0.261331		5.55	5.73	6.1	6.2	0.18169	0.15765	0.024042
YDR439W	LRS4	4.97	5.59	5.5	5.7	0.615451	0.17211	0.443344		5.391	5.86	6.3	5.9	0.46765	-0.42581	0.893462
YDL217C	TIM22	6.31	6.06	6.2	6.1	-0.247649	-0.02761	-0.220035		6.403	6.5	6.4	6.3	0.09837	-0.07703	0.175391
YFL017C	GNA1	6.56	6.76	7	6.5	0.196707	-0.48019	0.676893		6.754	6.6	7.4	6.7	-0.15377	-0.75572	0.601947
YJL093C	TOK1	5.28	5.95	7.4	7.6	0.665659	0.19029	0.475366		5.457	5.4	7.6	7.3	-0.06187	-0.26167	0.199795
YCL056C		3.35	4.22	6.2	5.5	0.86611	-0.63557	1.50168		3.328	4.06	5.2	6.4	0.72855	1.20149	-0.472932
YNL265C	IST1	6.29	6.45	6.4	6.3	0.162895	-0.11495	0.277848		6.711	6.73	6.4	6.3	0.01647	-0.10075	0.117219
YMR070W	MOT3	7.01	7.24	7.2	6.9	0.228068	-0.26479	0.492863		7.335	7.18	6.4	5.9	-0.15237	-0.52653	0.374161
YOR036W	PEP12	6.25	5.84	5.9	6.8	-0.405345	0.92154	-1.32689		5.916	6.62	5.9	6.7	0.70307	0.85467	-0.151598
YLR237W	THI7	6.93	7.31	6.6	7.1	0.377468	0.43276	-0.0552971		7.473	7.19	7.3	7.3	-0.28764	0.04643	-0.334074
YDR358W	GGA1	6.98	7.02	7.3	7.2	0.037804	-0.0409	0.0787063		7.088	7.6	7.2	7.2	0.51123	0.03843	0.472802
YAL010C	MDM10	6.08	5.86	6	6.2	-0.224375	0.18579	-0.410162		6.252	6.52	5.9	6.2	0.27002	0.30116	-0.031139
YLR116W	MSL5	6.52	6.58	6.5	6.6	0.056885	0.09045	-0.0335674		6.506	6.88	6.9	6.8	0.37855	-0.04857	0.427114
YLR350W	ORM2	8.05	7.61	7.5	7.8	-0.444524	0.26857	-0.71309		8.189	7.86	7.9	7.2	-0.32565	-0.74211	0.416456
YHL019C	APM2	5.31	5.53	7.1	7	0.215224	-0.09504	0.310262		5.959	6.25	6.8	7	0.28733	0.20989	0.077434
YKL092C	BUD2	6.79	6.54	6.6	6.6	-0.247988	-0.06357	-0.184421		6.372	5.68	5.1	6	-0.69353	0.86779	-1.56132
YJL138C	TIF2	12.94	13.62	11.7	11.7	0.682278	0.03989	0.642393		12.821	13.3	11.6	11.4	0.48254	-0.20496	0.687502
YDR394W	RPT3	8.97	8.73	8.6	8.2	-0.240656	-0.31888	0.0782221		9.042	8.7	8.6	8.1	-0.34632	-0.49482	0.148503
YEL050C	RML2	7	6.51	6.9	6.6	-0.496022	-0.28063	-0.215389		7.019	6.26	7	6.6	-0.76002	-0.45301	-0.307009
YJR154W		-0.81	2.46	5.3	5.5	3.27042	0.26612	3.0043		0.637	3.47	5.1	6.4	2.82825	1.26216	1.56609
YGR278W	CWC22	5.95	6.07	6.5	6.8	0.119629	0.28035	-0.160723		5.7	6.37	6.5	6.7	0.67373	0.22777	0.445961
YOR317W	FAA1	10.75	10.42	9.8	9.8	-0.33208	-0.00966	-0.322415		10.763	10.13	9.5	9.1	-0.634	-0.37574	-0.258263
YMR153W	NUP53	7.13	7.07	7.3	7.3	-0.052809	0.06055	-0.113358		7.213	7.23	7.4	7.2	0.01595	-0.20348	0.219427
YDR079W	PET100	4.81	5.91	5.3	4.6	1.10024	-0.69238	1.79262		5.584	6.13	5	4.7	0.55034	-0.34611	0.896446
YKR076W	ECM4	5.67	5.56	5	4.7	-0.103803	-0.26075	0.156943		5.877	6.41	5	5.6	0.53517	0.57862	-0.04345
YDL015C	TSC13	9.67	9.41	8.9	8.5	-0.262745	-0.42545	0.162704		9.595	9.31	8.7	8.5	-0.28053	-0.28376	0.003232
YBL057C	PTH2	7.23	6.47	7.1	6.5	-0.762794	-0.57966	-0.183139		7.504	6.91	7.6	6.7	-0.5903	-0.92009	0.329794
YJL225C		8.99	10.16	11.1	11.5	1.16689	0.37325	0.79364		7.955	9.56	11.2	11.2	1.60044	0.0004	1.60003
YLR390W-A	CCW14	11.18	11.69	9.1	9.4	0.508871	0.27829	0.230578		11.287	11.69	9	9.6	0.40426	0.6616	-0.257347
YPL051W	ARL3	4.93	5.47	5.4	5.5	0.535205	0.12256	0.412649		5.75	5.66	6	5.7	-0.09304	-0.27525	0.182209
YMR236W	TAF9	7.17	7.07	7.4	7.3	-0.100491	-0.05023	-0.0502641		7.435	7.64	8.1	7.7	0.20264	-0.42071	0.623358
YOL096C	COQ3	5.94	5.61	6	5.8	-0.324058	-0.18947	-0.13459		6.272	6.44	5.9	6.1	0.16581	0.23303	-0.067225
YMR315W		9.49	8.92	8.2	7.9	-0.569994	-0.36114	-0.208858		9.594	9.54	8.4	8.1	-0.05452	-0.31074	0.256215
YNL079C	TPM1	10.23	9.74	9	8.5	-0.486274	-0.52166	0.0353823		10.236	10	9.3	8.6	-0.23805	-0.74808	0.510026
YPL150W		6.28	6.13	7.1	7.5	-0.14543	0.35998	-0.505414		5.864	6.97	7	7.4	1.10348	0.39638	0.707102
YMR214W	SCJ1	8.15	7.76	7.8	7.3	-0.390206	-0.44959	0.0593817		8.418	7.81	8.3	7.2	-0.60729	-1.02014	0.412856
YNR015W	SMM1	6.08	7.36	7	7.5	1.27784	0.57489	0.702955		6.619	6.91	7.2	7.6	0.29535	0.33889	-0.04354
YPL235W	RVB2	8.76	8.45	8.2	8	-0.308016	-0.16695	-0.141067		8.461	8.24	7.7	7.7	-0.22337	-0.05573	-0.167644
YCL030C	HIS4	9.03	8.84	9.3	9.2	-0.193656	-0.08389	-0.109763		7.322	8.74	8.8	9.8	1.41579	1.08075	0.335041
YBL075C	SSA3	3.06	5.13	6.7	7	2.07261	0.29546	1.77716		4.068	6.16	7.2	7.7	2.09382	0.47781	1.61601
YEL036C	ANP1	8.28	8.31	8.3	8.4	0.033837	0.12454	-0.0906999		8.057	7.77	8.6	8.3	-0.28896	-0.30947	0.020516
YLR413W		9.62	9.86	8.7	9	0.242074	0.35162	-0.109542		9.089	7.79	8.7	8.2	-1.30002	-0.42629	-0.873729
YJR132W	NMD5	8.42	8.36	7.9	8.3	-0.065636	0.44095	-0.506588		8.262	8.2	7.8	8.4	-0.06478	0.58309	-0.647867
YJR099W	YUH1	6.2	6.38	6.7	6.2	0.177671	-0.58026	0.757933		6.608	6.65	7	6.7	0.04707	-0.3101	0.357172
YGL236C	MTO1	5.93	5.42	5.9	5.9	-0.517281	-0.02154	-0.495746		4.464	4.21	6.2	5.9	-0.24937	-0.30495	0.055581
YIL119C	RPI1	6.89	6.76	6.7	6.6	-0.129018	-0.16071	0.0316923		6.321	5.25	4.8	4.6	-1.06653	-0.14745	-0.919083
YLR251W	SYM1	4.21	3.9	6.3	6.2	-0.308227	-0.09454	-0.213685		5.906	6.26	6.5	6.3	0.35241	-0.23449	0.586894
YAL032C	PRP45	4.97	5.64	5.7	5.9	0.669811	0.19988	0.46993		5.436	5.89	6.1	6.1	0.45202	0.00148	0.450538
YMR052W	FAR3	4.4	4.66	4.9	4.9	0.261195	0.07588	0.185311		5.159	6.2	5.5	5.3	1.03837	-0.26452	1.30289
YDR178W	SDH4	7.22	8.41	6.8	7	1.18724	0.14275	1.04448		7.576	8.56	6.6	6.5	0.98664	-0.13348	1.12012
YLR017W	MEU1	8.4	8.24	7.4	7.4	-0.155162	-0.01226	-0.142902		8.396	8.34	7.6	7.2	-0.05911	-0.43982	0.380712
YLR372W	SUR4	10.24	10.02	9.9	9.4	-0.220949	-0.50785	0.286898		10.198	9.2	9.6	8.7	-0.99762	-0.89046	-0.107161
YDR493W	MZM1	5.4	4.63	5.5	4.8	-0.762987	-0.63038	-0.132606		5.978	5.95	5.8	5.1	-0.02801	-0.66542	0.637414
YGR058W	PEF1	5.74	6.02	5.4	6	0.273893	0.59135	-0.317453		6.242	6.3	6	6.4	0.05829	0.39493	-0.336639
YJL039C	NUP192	9.26	9.14	8.7	8.8	-0.121542	0.09014	-0.211686		9.038	8.79	8.2	8.5	-0.24988	0.26515	-0.515024
YNL302C	RPS19B	12.12	12.03	11	10.5	-0.087898	-0.535	0.4471		11.792	11.78	10.8	10.2	-0.00916	-0.6049	0.595742
YGR094W	VAS1	11.8	11.54	10.6	10.3	-0.258117	-0.33606	0.0779391		11.271	10.92	10.4	10.1	-0.3459	-0.29855	-0.047352
YKL193C	SDS22	7.07	6.97	7.1	6.6	-0.100682	-0.53985	0.439164		7.628	7.18	7.1	6.8	-0.45176	-0.29566	-0.156096
YOR252W	TMA16	6.51	7.12	5.9	5.9	0.611771	0.02238	0.589395		6.461	6.09	6.3	6.3	-0.37251	-0.01622	-0.356285
YDR538W	PAD1	5.11	4.81	5.3	6.1	-0.299039	0.76178	-1.06082		4.212	3.26	5.7	6.1	-0.95692	0.31979	-1.2767
YOR173W	DCS2	5.84	5.89	6.8	6.2	0.048905	-0.61619	0.665096		6.793	7.85	7.2	7.5	1.05869	0.29009	0.768599
YBR293W	VBA2	4.18	5.12	7.1	7.4	0.936445	0.30979	0.626655		4.133	6.49	7	7.3	2.36155	0.31842	2.04313
YGL070C	RPB9	6.81	6.39	6.8	6.4	-0.418623	-0.38754	-0.0310873		6.808	6.78	6.7	6.5	-0.02814	-0.19638	0.168239
YHR211W	FLO5	3.61	5.07	6.2	7	1.45352	0.80016	0.653366		2.153	4.99	7	7.1	2.83986	0.09714	2.74272
YIR012W	SQT1	8.45	8.81	8	8.2	0.361918	0.20253	0.159383		8.481	8.44	7.9	8.1	-0.04023	0.24922	-0.289448
YDL235C	YPD1	7.2	7.46	7	6.9	0.260641	-0.07707	0.337707		7.288	7.47	6.8	7.3	0.17692	0.48459	-0.307671
YJL192C	SOP4	8.35	8.08	7.9	7.2	-0.266978	-0.75749	0.49051		8.508	7.97	7.6	6.8	-0.54218	-0.82622	0.28404
YDL083C	RPS16B	11.7	11.55	10.4	9.9	-0.158853	-0.54393	0.385081		11.185	11.05	10	9.2	-0.13129	-0.77276	0.641465
YMR250W	GAD1	8.39	7.66	8.4	7.8	-0.732005	-0.68287	-0.0491345		9.38	8.98	8.7	7.8	-0.39679	-0.90617	0.509385
YPL271W	ATP15	7.76	8.63	6.7	6.9	0.870444	0.21341	0.657032		8.152	8.83	6.8	7.2	0.67471	0.36192	0.312789
YOR014W	RTS1	8.4	8.42	7.9	8	0.027711	0.06949	-0.0417741		8.162	8.15	7.4	7.7	-0.00918	0.30976	-0.318936
YLR134W	PDC5	11.72	12.04	7.3	7.3	0.323332	-0.04987	0.373202		11.781	11.92	7.1	6.5	0.13671	-0.58007	0.716773
YNL169C	PSD1	7.99	7.38	8.4	8	-0.607188	-0.3802	-0.226993		7.121	6.64	7.9	7.3	-0.48033	-0.58008	0.099757
YKL209C	STE6	10.04	10.3	9.7	9.9	0.254874	0.19564	0.0592321		9.695	10.41	8.8	9.9	0.7133	1.07661	-0.363308
YNL068C	FKH2	7.21	7.29	7	6.8	0.076323	-0.17376	0.250084		6.997	7.48	7.2	6.9	0.48212	-0.32069	0.802811
YJR101W	RSM26	6.92	6.41	7.3	6.9	-0.511273	-0.38289	-0.128382		6.942	6.29	7.2	6.7	-0.65593	-0.51555	-0.140379
YFL060C	SNO3	4.32	4.48	4.7	5.2	0.165842	0.50951	-0.343669		4.113	4.41	5.2	4.5	0.29696	-0.74048	1.03744
YBL064C	PRX1	7.69	8.29	7.6	7.5	0.6025	-0.07224	0.674739		8.203	8.32	7.9	7.3	0.12111	-0.56593	0.687042
YEL005C	VAB2	4.48	4.66	5.8	5.3	0.177238	-0.45246	0.629699		4.561	4.71	6	6.1	0.14743	0.14031	0.007124
YHR103W	SBE22	7.14	7.29	8.2	8.1	0.1508	-0.07611	0.226913		7.411	7.11	8	7.6	-0.30203	-0.41865	0.116624
YGL142C	GPI10	7.27	6.48	7	7	-0.795133	-0.05749	-0.737641		6.769	5.63	6.9	6.7	-1.13839	-0.18414	-0.954254
YHR002W	LEU5	3.81	4.7	6.3	6.2	0.88738	-0.10144	0.988817		4.115	4.83	5.8	5.6	0.71728	-0.25165	0.968925
YKR023W		5.72	5.97	6.2	6.2	0.257588	-0.07448	0.332066		6.143	6.55	5.3	6.6	0.41183	1.34322	-0.931388
YMR160W		5.97	6.03	6.6	6.4	0.058871	-0.17819	0.237062		6.097	6.1	6.4	6.3	0.00494	-0.1085	0.113438
YER069W	ARG5,6	8.33	8.95	7.6	8	0.623056	0.41154	0.211516		9.285	9.18	8.1	8.5	-0.10003	0.39066	-0.490686
YLR107W	REX3	5.85	6.63	6.8	7.3	0.775822	0.5206	0.255225		5.561	6.86	6.3	7.3	1.29859	1.07473	0.223856
YMR061W	RNA14	7.24	7.23	7.9	7.9	-0.010283	0.02002	-0.0302976		7.186	7.28	7.2	7.4	0.09082	0.20908	-0.118267
YOR027W	STI1	11.39	10.02	9	8	-1.36427	-0.9955	-0.368774		12.439	11.43	10.1	9.3	-1.01328	-0.77346	-0.239817
YLR240W	VPS34	6.65	6.88	6.7	6.8	0.233855	0.11914	0.114716		6.44	6.71	6.7	6.9	0.26902	0.20965	0.059373
YMR263W	SAP30	5.78	5.88	6.3	6.3	0.106277	0.02038	0.0858962		5.854	6.22	6.3	6.8	0.3682	0.5331	-0.164902
YDR385W	EFT2	14.93	15.07	12.9	12.8	0.135082	-0.1346	0.269683		14.374	14.09	12.7	12.3	-0.28834	-0.40749	0.119148
YJL129C	TRK1	6.47	6.9	7.7	7.9	0.435048	0.23804	0.19701		6.139	6.67	7.6	7.6	0.52983	0.03104	0.49879
YML049C	RSE1	7.19	7.53	7.4	7.5	0.34032	0.06144	0.278882		7.134	6.97	7.1	7.3	-0.16704	0.16361	-0.330647
YBR282W	MRPL27	6.57	5.95	5.7	5	-0.617318	-0.63363	0.0163082		6.534	6.03	5.5	5	-0.50903	-0.43592	-0.073114
YLR143W		7.18	6.81	7.1	6.9	-0.363492	-0.14605	-0.217438		6.795	7.28	6.7	7.2	0.48491	0.47484	0.010071
YLR446W		5.55	5.48	4.9	4.7	-0.069008	-0.22487	0.155865		6.264	5.82	5.4	5.1	-0.44438	-0.26068	-0.183699
YOR063W	RPL3	13.72	13.53	13	12.6	-0.189134	-0.41759	0.228454		13.434	13.2	12.8	12.1	-0.23736	-0.69049	0.453128
YPL218W	SAR1	9.69	9.61	9.4	8.6	-0.073853	-0.75145	0.677595		10.105	9.63	9.7	8.6	-0.47744	-1.05274	0.575297
YDL224C	WHI4	7.78	7.86	7.7	7.9	0.080478	0.26619	-0.185715		7.592	7.86	7.7	8	0.27013	0.25252	0.017601
YKR067W	GPT2	7.68	7.75	6.7	7	0.072457	0.26571	-0.193256		8.047	8.2	6.5	6.9	0.14813	0.37066	-0.222535
YFL024C	EPL1	6.28	6.86	6.7	7	0.578329	0.36202	0.21631		6.06	6.34	5.9	6.8	0.27605	0.89973	-0.623681
YHR200W	RPN10	8.95	8.88	8.3	7.9	-0.071039	-0.37351	0.302472		9.026	8.28	8.6	7.9	-0.74362	-0.73351	-0.010116
YFR048W	RMD8	5.65	6.26	7.1	7.4	0.617904	0.32713	0.290779		6.042	6.41	7.2	7.4	0.3678	0.18283	0.184974
YMR124W		7.13	7.69	6.9	7.2	0.562208	0.3008	0.26141		7.089	7.85	7	7.4	0.75885	0.39618	0.362667
YOL087C		6.73	7.28	7.9	8	0.550846	0.10023	0.450616		6.642	7.26	7.3	7.5	0.61562	0.19562	0.420003
YNR040W		5.61	5.33	5.7	5.5	-0.279195	-0.18998	-0.089212		6.093	5.86	5.8	5.7	-0.23268	-0.12434	-0.108337
YPL260W		8.55	8.43	8	7.9	-0.117924	-0.04791	-0.0700146		8.74	8.56	7	8.1	-0.17754	1.05125	-1.2288
YMR025W	CSI1	4.72	4.32	5.2	4.9	-0.392699	-0.32304	-0.0696594		5.06	5.57	4.4	5.5	0.50656	1.16366	-0.657096
YLR204W	QRI5	5.41	5.38	5.5	5.3	-0.026471	-0.13495	0.108482		5.489	5.97	5.5	5.1	0.47587	-0.34266	0.818529
YKL128C	PMU1	7.68	7.57	7.4	7	-0.114484	-0.40761	0.293125		7.606	7.89	7.5	7.4	0.28045	-0.03506	0.315505
YMR304W	UBP15	8.25	8.04	7.6	7.5	-0.208416	-0.09632	-0.112094		8.411	8.05	6.8	7.6	-0.36228	0.76076	-1.12304
YDR450W	RPS18A	12.03	12.11	10.9	10.4	0.075121	-0.53144	0.606556		11.781	11.78	10.5	9.7	0.00351	-0.84079	0.844304
YKL029C	MAE1	9.69	9.05	8.5	8.1	-0.644162	-0.38305	-0.261111		9.486	8.72	8.5	8.6	-0.76934	0.10777	-0.87711
YBR228W	SLX1	3.84	5.05	6	6.1	1.20929	0.1137	1.09559		4.589	6.59	6.1	6.6	2.00246	0.48578	1.51668
YJR123W	RPS5	13.26	13.28	12.2	11.8	0.018356	-0.47762	0.49598		12.855	12.68	11.9	11.2	-0.17876	-0.71384	0.535077
YFL042C		6.5	6.17	6.4	6.5	-0.338542	0.15164	-0.490178		6.261	6.37	6.9	7.1	0.10488	0.18501	-0.080135
YJR022W	LSM8	4.46	4.82	4.8	4.7	0.351831	-0.09691	0.448746		5.441	4.93	5.3	4.8	-0.50873	-0.54355	0.034822
YGL124C	MON1	5.37	6.1	6.9	6.9	0.722759	0.05407	0.668686		5.758	6.55	7	7.2	0.78805	0.21719	0.570858
YPR098C		7.4	7.47	6.3	5.8	0.069213	-0.49013	0.559348		7.344	8.04	6.1	5.6	0.69205	-0.50225	1.1943
YHL008C		5.85	6.78	6.6	6.9	0.93087	0.35926	0.571609		6.256	6.45	6.3	6.7	0.19569	0.37827	-0.182583
YGL025C	PGD1	6.67	7.04	6.6	6.7	0.369665	0.18619	0.183473		6.765	6.8	6.7	6.7	0.03177	-0.02925	0.061021
YNL284C	MRPL10	7.44	7.26	7.2	7.4	-0.176726	0.21758	-0.394307		7.066	7.17	7.1	7.2	0.1012	0.04243	0.058778
YJL208C	NUC1	6.81	7.18	6.3	6.3	0.361405	0.04063	0.320778		6.795	6.64	6.6	6.8	-0.15651	0.23641	-0.392927
YGR049W	SCM4	6.21	6.34	5.4	5.6	0.130941	0.1558	-0.0248564		6.826	6.41	6.2	5.7	-0.41519	-0.55041	0.135219
YOR140W	SFL1	6.66	6.86	5.7	5.9	0.206276	0.25519	-0.0489167		5.969	6.1	5.7	5.7	0.12606	-0.01885	0.144908
YDR068W	DOS2	6.83	6.21	6.5	6.4	-0.625205	-0.164	-0.461205		6.752	6.84	5.2	6.6	0.09048	1.39479	-1.30431
YMR043W	MCM1	7.94	8.05	7.3	7.4	0.110653	0.11609	-0.0054393		7.85	7.71	7.5	7.3	-0.13763	-0.22448	0.086842
YLR060W	FRS1	10.79	10.35	9.7	9.4	-0.434762	-0.34415	-0.0906099		10.543	9.93	9.6	9.2	-0.61014	-0.40674	-0.203392
YLL048C	YBT1	9.82	10.15	9.1	9.2	0.330893	0.01917	0.311724		9.63	9.63	9	8.9	-0.00315	-0.0588	0.05565
YER087W	AIM10	6.63	5.95	6.5	6.1	-0.673475	-0.45859	-0.214888		6.675	6.23	6.3	6	-0.44827	-0.24743	-0.200835
YNL248C	RPA49	8.58	8.67	8.2	8.3	0.085246	0.13434	-0.0490886		8.179	8.27	8.1	8.2	0.09089	0.09987	-0.008987
YPR068C	HOS1	4.89	4.04	5.5	5.6	-0.850187	0.10164	-0.951827		5.395	5.4	5.8	5.4	-0.00023	-0.40623	0.406001
YBL103C	RTG3	5.85	6.39	6.8	7	0.541433	0.17019	0.371247		6.318	6.92	6.6	7	0.60555	0.39799	0.207562
YCR081W	SRB8	6.49	7.02	6.3	6.7	0.527788	0.44921	0.0785796		6.506	7.02	5.9	7.1	0.51786	1.24812	-0.730261
YEL063C	CAN1	8.59	8.53	7.9	8.1	-0.061147	0.20489	-0.266033		8.535	8.08	7.7	7.7	-0.45252	0.00368	-0.456195
YDL040C	NAT1	9.66	9.33	8.9	8.6	-0.323168	-0.26043	-0.0627419		9.226	8.72	8.8	8.7	-0.51066	-0.13578	-0.374876
YLR420W	URA4	9.64	8.91	9.3	8.5	-0.7256	-0.74581	0.0202143		8.869	8.48	8.6	8.7	-0.38727	0.09893	-0.486201
YJR066W	TOR1	8.16	8.12	7.5	7.7	-0.034475	0.21389	-0.24836		7.671	7.74	7.1	7.2	0.06886	0.11618	-0.047326
YHR121W	LSM12	7.25	6.77	6.9	6.8	-0.47707	-0.08977	-0.387299		7.414	6.98	6.9	6.3	-0.4299	-0.63278	0.202879
YGL061C	DUO1	5.34	5.5	5.7	5.4	0.156223	-0.23181	0.388029		5.761	5.65	5.2	5	-0.11087	-0.2049	0.094039
YIR003W	AIM21	7.49	7.12	7.5	7.5	-0.367855	0.02195	-0.389808		7.286	7.33	7.6	7.8	0.04042	0.21081	-0.170387
YHR020W		11.07	10.77	9.8	9.5	-0.297482	-0.26074	-0.0367403		10.744	10	9.6	9	-0.7435	-0.56905	-0.174446
YOR104W	PIN2	5.94	6.7	5.9	6.5	0.758827	0.53858	0.220246		6.036	6.54	5.4	6.3	0.5045	0.95997	-0.45547
YLR226W	BUR2	6.05	5.89	6.4	6.7	-0.151956	0.29362	-0.445574		6.119	6.61	6.4	7.2	0.48901	0.85469	-0.365679
YMR241W	YHM2	9.2	8.84	8.5	8	-0.36522	-0.48709	0.12187		9.102	8.88	8.6	8.3	-0.22601	-0.31943	0.093424
YJL198W	PHO90	7.87	8.02	8.5	8.6	0.154348	0.10345	0.0508986		7.806	7.47	8.8	8.5	-0.33852	-0.29957	-0.038948
YAR010C		13.34	12.78	11.4	10.9	-0.55832	-0.50126	-0.057059		13.3	12.98	11.3	11.6	-0.31524	0.22263	-0.537872
YAL034W-A	MTW1	5.16	4.25	5.5	5.1	-0.909582	-0.44871	-0.460868		5.232	5.15	5.5	5.3	-0.08606	-0.27244	0.18638
YBR211C	AME1	5.78	5.28	6.4	6.3	-0.498683	-0.07415	-0.424535		6.069	5.94	6.7	6.2	-0.12703	-0.47212	0.345087
YOR298C-A	MBF1	9.92	8.9	9.2	8.6	-1.02136	-0.59915	-0.422214		10.496	9.84	9.9	9.6	-0.65555	-0.30448	-0.35107
YGL103W	RPL28	12.88	12.53	12.4	11.9	-0.345145	-0.5165	0.171355		12.441	12.45	12.6	12.1	0.00909	-0.51807	0.527167
YGL195W	GCN1	11.52	11.38	9.6	9.7	-0.142406	0.06883	-0.211233		11.293	11.07	9.3	9.4	-0.22037	0.1461	-0.366471
YFR053C	HXK1	10.29	9.98	8.8	8.4	-0.312569	-0.34492	0.0323532		11.07	9.65	8.4	6.9	-1.41725	-1.52368	0.10643
YDR217C	RAD9	7.01	6.94	6.9	7.4	-0.064883	0.4437	-0.508588		6.645	6.65	5.7	7.3	0.00725	1.60809	-1.60084
YLL035W	GRC3	6.04	6.31	6.4	6.7	0.271386	0.31774	-0.0463506		5.909	6.06	6.7	6.8	0.15042	0.10531	0.045115
YGR171C	MSM1	5.27	5.41	6.2	6	0.139583	-0.21475	0.354338		5.302	5.7	6.1	6	0.39515	-0.14028	0.535422
YLR059C	REX2	6.81	7.45	6.4	6.8	0.634856	0.37812	0.256734		7.084	6.46	7.2	6.4	-0.62049	-0.81509	0.194609
YOL115W	PAP2	7.02	6.63	7.1	7.2	-0.389068	0.13851	-0.527574		6.69	6.56	7	6.7	-0.12999	-0.29721	0.167223
YDR532C	KRE28	4.61	4.39	6.1	6	-0.215611	-0.03473	-0.180879		4.726	5.24	5.3	5.8	0.51606	0.58685	-0.070787
YDR051C	DET1	6.91	6.75	7.4	7.2	-0.160296	-0.13281	-0.0274846		6.604	6.96	7.3	7.3	0.36105	-0.02575	0.386804
YOR179C	SYC1	5.8	5.4	5.3	5.5	-0.399167	0.22836	-0.627528		5.62	5.82	5.5	5.6	0.20278	0.06106	0.141718
YBR057C	MUM2	6.79	6.05	6.8	6.9	-0.742688	0.10114	-0.843827		6.549	6.37	6.7	6.8	-0.17885	0.16	-0.338851
YGR250C		7.37	8.22	7.5	8.2	0.853732	0.7309	0.122835		7.701	8.35	7.8	8.4	0.64907	0.58598	0.063091
YPR172W		7.37	6.87	5.9	5.4	-0.494265	-0.47065	-0.0236186		7.708	7.41	6.6	5.5	-0.30262	-1.11156	0.808934
YKR092C	SRP40	9.11	9.11	8.8	9.1	0.001448	0.21602	-0.214569		9.096	8.64	9.2	9.3	-0.45616	0.05246	-0.508619
YJL033W	HCA4	8.14	7.88	7.6	8	-0.254528	0.42132	-0.675853		7.448	7.67	7.7	8.3	0.22064	0.59751	-0.376879
YML070W	DAK1	9.74	9.12	8.7	8.1	-0.623092	-0.52569	-0.0974013		10.322	10.02	9.1	8.2	-0.30558	-0.87278	0.567205
YBR130C	SHE3	7	6.99	7	7.2	-0.010144	0.13811	-0.148256		7.267	6.49	6.9	7.2	-0.78044	0.2794	-1.05983
YLR095C	IOC2	7.31	7.39	7.3	7.5	0.076883	0.17129	-0.0944099		7.441	7.01	7.5	7.6	-0.42747	0.1002	-0.527671
YDR411C	DFM1	7.8	7.6	7.7	7.5	-0.20263	-0.25469	0.0520553		7.66	7.46	7.7	7.3	-0.19595	-0.46504	0.269087
YML117W	NAB6	8.26	8.35	8.6	8.8	0.087204	0.23032	-0.143119		7.976	7.98	8.5	8.8	0.00553	0.31743	-0.311903
YFR017C		4.78	5.91	4.9	5.5	1.13402	0.56554	0.568477		5.524	5.91	5	4.1	0.38785	-0.95647	1.34432
YPR051W	MAK3	7.05	7.31	6.6	6.5	0.260773	-0.04472	0.305491		6.501	7.03	6.3	6	0.53212	-0.24442	0.776535
YNL073W	MSK1	5.92	5.59	7	6.5	-0.328303	-0.48662	0.158316		5.431	5.16	6.7	6.2	-0.26949	-0.48998	0.22049
YDR370C		5.35	5.77	6.8	7.2	0.421342	0.39343	0.0279131		4.891	5.05	7	7.1	0.1551	0.07471	0.080395
YMR296C	LCB1	9.33	9.28	8.6	8.5	-0.057501	-0.15919	0.101691		8.939	8.66	8.6	8.6	-0.27622	-0.00395	-0.27227
YAL038W	CDC19	15.66	15.29	13.2	12.5	-0.368201	-0.6711	0.302899		15.457	15.17	12.8	12.2	-0.29158	-0.5667	0.275124
YOL151W	GRE2	7.91	7.64	7.1	7.1	-0.27128	-0.07792	-0.193356		8.087	8.27	7	6.7	0.18485	-0.34986	0.534716
YLR378C	SEC61	10.29	10	8.5	8.3	-0.284596	-0.16945	-0.115145		10.136	8.82	8.5	8.1	-1.31644	-0.40487	-0.911566
YER050C	RSM18	6.02	6.08	5.6	5.6	0.063547	-0.05337	0.116913		6.346	6.4	5.6	5.2	0.05095	-0.39446	0.445417
YOL036W		6.88	7.08	7.4	7.7	0.196246	0.28198	-0.0857327		7.123	7.4	7.7	8	0.28166	0.28898	-0.007318
YIL113W	SDP1	3.43	3.72	5.2	4.5	0.292151	-0.73178	1.02393		4.025	3.72	5.9	5.2	-0.30874	-0.71223	0.40349
YGL159W		6.32	6.45	6.6	6.8	0.136386	0.21901	-0.0826238		6.012	6.29	6.3	7	0.27875	0.77788	-0.499129
YJR093C	FIP1	6.65	6.54	6.4	6.8	-0.107481	0.4127	-0.520178		6.472	6.8	7	7.2	0.32932	0.25161	0.077716
YHR019C	DED81	11.36	10.92	10.2	9.8	-0.437452	-0.38521	-0.0522376		10.988	10.31	10	9.4	-0.68067	-0.58357	-0.097103
YKR038C	KAE1	7.42	7.12	8	8.1	-0.296792	0.08515	-0.381945		7.029	6.73	8.4	8.3	-0.29666	-0.09117	-0.205498
YJL099W	CHS6	6.15	6.94	6.8	7.1	0.789951	0.31204	0.47791		5.908	7.23	6.7	7.3	1.31797	0.60554	0.712437
YGL058W	RAD6	7.11	7.38	6.1	6.2	0.271452	0.05917	0.212284		7.266	7.46	6.3	6	0.18978	-0.23853	0.428318
YHR118C	ORC6	6.14	6.3	6.5	6.4	0.163567	-0.08491	0.248476		6.179	6.47	6.5	6.8	0.2863	0.32222	-0.035915
YCR030C	SYP1	8.7	8.69	7.8	7.7	-0.008065	-0.07349	0.0654296		8.469	8.38	7.7	7.5	-0.08883	-0.10649	0.017654
YPL259C	APM1	7.11	6.77	7.1	7.6	-0.336033	0.44343	-0.779467		7.054	6.98	7	7.2	-0.07676	0.25	-0.326765
YGR117C		7.44	6.85	7.6	7.2	-0.587807	-0.32095	-0.266854		7.515	7.53	7.3	6.9	0.01791	-0.3764	0.394305
YER115C	SPR6	3.9	4.16	6.3	6.2	0.258863	-0.14198	0.400845		3.66	4.5	6.4	6.1	0.84362	-0.30042	1.14404
YNL015W	PBI2	8.05	7.29	6.2	5.5	-0.764017	-0.72865	-0.0353702		8.325	8.34	6.7	5.4	0.01828	-1.30354	1.32182
YBR112C	CYC8	8.95	8.88	8.3	8.2	-0.066643	-0.05427	-0.0123722		8.779	8.17	8.3	8	-0.60544	-0.32004	-0.285398
YBL019W	APN2	4.48	4.99	6.1	6.3	0.505455	0.2025	0.302952		5.001	5.21	6.2	6.6	0.20976	0.40737	-0.197604
YLR194C		7.15	8.04	7.1	8.2	0.890271	1.15759	-0.267318		7.53	8.54	8.4	8.7	1.00989	0.2354	0.774495
YDL178W	DLD2	8.11	8.13	7.7	7.8	0.020859	0.01229	0.0085723		7.975	8.02	7.6	7.8	0.04935	0.24957	-0.200219
YNL172W	APC1	6.53	7.07	7.3	7.5	0.542679	0.18086	0.361823		6.493	6.56	6.9	7	0.06921	0.06168	0.007527
YNL253W	TEX1	5.59	5.95	6.3	6.1	0.363973	-0.14434	0.508312		6.183	6.25	6.1	6.5	0.06932	0.38243	-0.31311
YKL212W	SAC1	9.84	9.71	9.1	9	-0.132132	-0.03916	-0.0929674		9.68	9.45	9	9	-0.226	-0.04452	-0.181476
YKR004C	ECM9	5.57	5.16	6.2	6.1	-0.410398	-0.10643	-0.303967		5.555	5.26	6.1	6.1	-0.29972	-0.01169	-0.288029
YCL018W	LEU2	11.51	11.94	9.7	9.6	0.430263	-0.05685	0.487111		11.33	11.43	9.4	9.2	0.0993	-0.20487	0.304175
YFL059W	SNZ3	4.48	5.12	6.1	6	0.644698	-0.14773	0.79243		4.958	4.51	6.6	6	-0.45231	-0.54131	0.089001
YPR114W		7.74	7.91	8	7.9	0.165816	-0.12934	0.295153		7.456	6.74	8.2	7.8	-0.71363	-0.34963	-0.363992
YNL136W	EAF7	6.18	5.95	6.2	6.4	-0.224881	0.18518	-0.410061		6.059	6.22	5.1	6.6	0.16363	1.54425	-1.38062
YNL051W	COG5	6.37	6.42	6.8	6.8	0.048398	-0.07751	0.125913		6.385	6.66	6.7	7.2	0.2775	0.48011	-0.202609
YJL055W		8.23	8.43	8.2	8	0.197326	-0.14889	0.346215		8.113	8.25	8.3	7.6	0.13861	-0.68089	0.8195
YNL217W		6.01	5.61	6.4	6.7	-0.401931	0.23635	-0.638281		5.512	4.92	6	5.8	-0.59447	-0.15919	-0.435277
YER036C	ARB1	10.61	10.59	9.8	9.6	-0.018838	-0.11425	0.0954134		10.633	10.2	9.7	9.7	-0.43406	-0.0306	-0.403466
YBR156C	SLI15	4.99	5.94	6.2	6.2	0.949537	0.01349	0.936044		5.444	5.59	5.9	6.2	0.14889	0.30394	-0.155047
YOL137W	BSC6	7.13	7.37	6.5	6.8	0.245996	0.23457	0.0114299		6.801	7.09	6.7	7	0.28625	0.24813	0.038122
YER151C	UBP3	8.04	8.15	7.9	7.7	0.116101	-0.17829	0.294394		8.106	7.72	7.3	7.9	-0.38514	0.52111	-0.906253
YOL014W		-27.62	-0.73	5.5	5.6	26.8904	0.07219	26.8182		-28.787	-0.54	5.7	5.2	28.2426	-0.55232	28.7949
YLR158C	ASP3-3	5.74	7.16	9.3	9.5	1.41744	0.2051	1.21234		5.875	7.57	9.2	9.2	1.69814	-0.05157	1.74971
YLR396C	VPS33	6.77	6.58	6.9	7.5	-0.192119	0.61041	-0.802526		6.639	6.94	7.3	7.6	0.30324	0.29284	0.010405
YJL132W		5.8	6.5	6.5	6.8	0.693899	0.35377	0.340131		5.792	6.25	6.2	6.4	0.45626	0.19221	0.264056
YML052W	SUR7	9.22	9.47	8.6	8.3	0.248382	-0.30973	0.558107		9.554	8.32	8.8	7.2	-1.23135	-1.59551	0.364163
YIL056W	VHR1	5.33	6.75	7.2	7.7	1.42317	0.49993	0.92324		6.431	7.34	7.1	7.7	0.91401	0.67475	0.239256
YKL098W	MTC2	4.88	5.17	6.5	6.7	0.2881	0.15712	0.130982		5.278	5.98	6.9	6.9	0.70315	0.01705	0.686101
YDL130W-A	STF1	6.56	6.29	5.2	5.5	-0.269134	0.36394	-0.633076		6.962	7.28	5.1	5.2	0.32251	0.0192	0.303315
YJL213W		-26.18	1.26	5.5	6.4	27.4362	0.89167	26.5445		-1.946	3.05	6.6	7.2	4.99112	0.62675	4.36436
YJL088W	ARG3	6.18	6.12	5.9	5.7	-0.060343	-0.22023	0.15989		7.819	7.19	7.3	6.9	-0.62579	-0.33036	-0.295433
YKL067W	YNK1	8.3	7.89	7.7	7.1	-0.407301	-0.55458	0.147283		8.634	8.4	7.9	7	-0.23018	-0.9449	0.714719
YDR224C	HTB1	10.32	9.88	10.1	9.5	-0.446568	-0.58869	0.142117		10.305	8.95	10.4	9	-1.35409	-1.44311	0.089022
YDR026C		4.94	5.08	6.8	7.2	0.137908	0.32465	-0.186742		4.838	5.52	6.8	7.6	0.6806	0.78668	-0.106081
YOR312C	RPL20B	12.3	12.38	11	10.6	0.075767	-0.37886	0.454625		12.091	11.97	10.5	9.8	-0.12433	-0.71471	0.590379
YPL086C	ELP3	7.94	7.78	7.8	7.5	-0.154625	-0.371	0.216376		7.832	7.54	7.8	7.5	-0.2913	-0.32815	0.036846
YGR106C	VOA1	10.02	9.63	9	8.3	-0.392358	-0.74925	0.356894		10.01	9.43	8.6	7.6	-0.58326	-0.99379	0.41053
YGR241C	YAP1802	7	7.32	7.5	7.5	0.318806	-0.00913	0.327935		7.293	7.14	7.7	7.4	-0.15056	-0.32044	0.169881
YDR422C	SIP1	6.38	6.58	7.3	7.5	0.199865	0.20318	-0.0033179		6.63	6.95	7.5	7.5	0.3244	-0.04276	0.367161
YOR249C	APC5	5.27	5.89	6.7	6.9	0.621662	0.18588	0.435784		5.57	6.35	6.1	6.8	0.77675	0.71732	0.059435
YNL242W	ATG2	6.46	6.71	6.5	6.5	0.254328	-0.02298	0.277311		6.958	6.78	6.1	6	-0.17935	-0.04656	-0.132789
YPR062W	FCY1	8.13	8.12	8.2	8.1	-0.008876	-0.03719	0.0283122		7.997	7.86	8.4	8.1	-0.13414	-0.30362	0.169485
YBR222C	PCS60	8.18	8.04	7.5	7.6	-0.134934	0.11187	-0.246804		8.849	8.25	7.8	7.8	-0.59691	-0.0282	-0.568703
YJR129C		4.68	5.12	5	4.8	0.445844	-0.16275	0.608597		4.713	4.67	5.3	5.1	-0.04409	-0.23406	0.189969
YCR047C	BUD23	6.68	6.72	7.1	7.2	0.044385	0.04678	-0.0023901		6.658	6.79	7.9	7.3	0.13642	-0.5553	0.691726
YDL248W	COS7	8.43	8.94	8.2	8.4	0.505977	0.27816	0.227821		8.491	8.81	8	8.2	0.31879	0.17781	0.140973
YBR121C	GRS1	11.32	11.15	10.3	9.9	-0.170639	-0.39846	0.227824		10.998	10.42	10.2	9.7	-0.57856	-0.49194	-0.086618
YLL006W	MMM1	6.76	6.78	6.3	6.3	0.022832	0.02563	-0.0027964		6.694	7.14	6.5	6.7	0.45036	0.25302	0.197344
YNL040W		6.64	7.01	6.7	6.5	0.366298	-0.19585	0.562146		7.005	7.11	7	6.9	0.10689	-0.08946	0.196353
YKL023W		5.78	5.76	5.6	5.6	-0.021369	0.03092	-0.0522865		6.084	6.7	6.1	6.5	0.61704	0.46565	0.151392
YPR026W	ATH1	6	6.52	6.6	7	0.520491	0.42025	0.100243		7.244	7.82	6.9	7.1	0.57131	0.11865	0.452663
YNL141W	AAH1	8.28	7.89	7.6	7.7	-0.382817	0.06003	-0.44285		8.012	7.22	8.5	8.4	-0.79295	-0.11183	-0.68112
YJL145W	SFH5	8.02	7.7	7.1	6.7	-0.320461	-0.41012	0.0896579		7.837	7.59	7.4	7.2	-0.24814	-0.20231	-0.045824
YPR127W		6.46	5.71	6.8	6.4	-0.754667	-0.41718	-0.337485		7.24	6.72	7.5	6.5	-0.52104	-1.06984	0.548803
YDR260C	SWM1	5.91	6.04	5.8	5.9	0.126168	0.08999	0.0361789		5.662	5.69	6	5.9	0.0246	-0.11046	0.135056
YGR043C	NQM1	4.26	5.85	5	5.7	1.59003	0.7007	0.889331		7.02	8.91	6.7	7.6	1.89319	0.85113	1.04207
YDR361C	BCP1	7.77	7.59	7.4	7.3	-0.180115	-0.09389	-0.0862271		7.227	7.18	6.8	6.9	-0.0444	0.08795	-0.132356
YMR287C	DSS1	5.57	5.73	6.1	6	0.159426	-0.08425	0.243678		5.007	5.59	4.7	5.7	0.58567	1.01513	-0.429454
YMR049C	ERB1	9.04	9.01	7.9	8.2	-0.037255	0.29811	-0.335368		8.663	8.31	8	8.4	-0.34963	0.39881	-0.748444
YIL021W	RPB3	8.05	7.74	8	7.8	-0.308543	-0.25245	-0.0560976		8.035	7.54	8	7.6	-0.49922	-0.37029	-0.128929
YDL086W		8.4	8.62	7.6	7.4	0.222625	-0.24694	0.469566		8.533	9.13	7.9	7.8	0.59685	-0.0926	0.689448
YHL002W	HSE1	7.04	7.15	7.3	7.5	0.115362	0.19875	-0.0833859		7.313	7.5	7.5	7.6	0.1847	0.08221	0.102486
YIL120W	QDR1	4.15	4.61	5.5	5.5	0.462728	0.02229	0.440443		3.66	5.97	6.1	6.4	2.31047	0.39005	1.92041
YCR021C	HSP30	5.05	6.61	6.5	5.5	1.56337	-0.97746	2.54082		6.852	8.69	6	6.2	1.83543	0.18305	1.65238
YGL148W	ARO2	10.14	9.92	9.2	8.8	-0.218894	-0.33584	0.116942		9.719	9.25	9.3	8.4	-0.46901	-0.90302	0.434003
YHR008C	SOD2	9.5	9.5	8	8	-0.000259	-0.05349	0.053233		9.371	9.67	8.3	7.9	0.30286	-0.38958	0.692442
YJR082C	EAF6	4.94	5.39	5.4	5.6	0.44967	0.27729	0.172381		5.415	6.92	5.9	6	1.50937	0.1783	1.33107
YKR029C	SET3	6.49	6.69	7.1	7	0.194024	-0.04612	0.240148		6.91	7.18	6.2	7	0.26716	0.88482	-0.617665
YIL003W	CFD1	5.46	5.46	6.2	6.2	-0.00621	0.05477	-0.060977		4.926	5.4	6.8	6.9	0.47706	0.07602	0.401036
YDR488C	PAC11	4.63	5.14	5.8	5.9	0.518532	0.03305	0.485479		4.806	4.81	6	5.4	0.00499	-0.52614	0.531136
YKL045W	PRI2	7.18	6.96	7.2	7.2	-0.219204	0.04438	-0.263585		6.581	6.71	6.7	6.8	0.13308	0.09792	0.035165
YDR105C	TMS1	7.33	7.44	7.3	7.3	0.104718	-0.01365	0.118365		7.634	7.5	7.5	7.2	-0.12936	-0.23676	0.107405
YOL140W	ARG8	6.41	6.27	7.2	7.3	-0.141359	0.09838	-0.239743		7.943	6.83	8.1	8.1	-1.11027	0.00479	-1.11506
YDR343C	HXT6	10.31	10.55	9.6	9.8	0.23692	0.24572	-0.0088023		10.781	9.5	9.4	8.6	-1.28078	-0.8592	-0.421579
YER162C	RAD4	5.22	5.75	6.4	6.6	0.533499	0.25158	0.281923		5.181	6.56	5.8	7	1.38127	1.26383	0.117441
YBR002C	RER2	6.43	6.27	7	7.3	-0.155194	0.34235	-0.49754		5.834	6.44	7.2	7.5	0.60867	0.37961	0.22906
YCR087C-A		6.98	7.15	6	6.2	0.165023	0.20822	-0.0432015		6.404	7.31	6.3	6.1	0.91019	-0.1449	1.05509
YLR084C	RAX2	7.77	7.87	7.5	7.5	0.094781	0.01304	0.0817439		7.855	7.45	7.8	7.7	-0.40613	-0.12614	-0.279995
YHR080C		5.63	6.09	7.4	7.3	0.46402	-0.03981	0.503833		5.114	5.85	6	6.7	0.74058	0.64846	0.092122
YPR040W	TIP41	6.43	6.83	6.4	6.4	0.391717	0.06974	0.321981		6.817	6.85	6.8	6.5	0.02944	-0.33133	0.360775
YML007W	YAP1	7.62	7.46	7.9	8	-0.166682	0.14411	-0.310787		7.333	7.52	7.5	7.6	0.1867	0.14604	0.040663
YML106W	URA5	9.53	10.06	8.9	8.8	0.52781	-0.12546	0.653265		9.336	9.05	9	8.5	-0.28091	-0.48826	0.20735
YJL167W	ERG20	10.86	10.12	9.5	8.8	-0.741018	-0.72431	-0.0167042		10.656	9.6	9.4	8.6	-1.05439	-0.79631	-0.25808
YHR016C	YSC84	7.53	6.78	7.2	6.8	-0.750758	-0.47546	-0.275295		7.504	7.63	7.2	6.5	0.13105	-0.67252	0.80357
YNL038W	GPI15	5.54	5.11	6.6	6.4	-0.426543	-0.2392	-0.187342		5.023	5.53	6	6.4	0.50329	0.46302	0.040265
YPL169C	MEX67	7.94	7.82	7.9	7.9	-0.117867	-0.02185	-0.0960155		7.987	7.93	7.8	7.8	-0.06157	0.03854	-0.10011
YER027C	GAL83	8.24	7.55	6.8	6.9	-0.683116	0.10829	-0.791404		7.944	7.2	7	6.6	-0.7446	-0.43778	-0.306819
YNL026W	SAM50	6.83	6.77	7.5	7.2	-0.054821	-0.2648	0.209978		7.14	6.84	7.5	7.2	-0.30325	-0.30185	-0.001398
YGL085W	LCL3	3.34	4.38	5.9	5.8	1.04489	-0.03298	1.07787		3.932	4.77	6.1	6	0.84252	-0.09888	0.941393
YNL127W	FAR11	6.35	6.72	6.8	7.1	0.373367	0.28751	0.0858611		6.621	6.69	6.7	7.4	0.07084	0.63525	-0.56441
YER126C	NSA2	8.28	8.12	7.4	7.5	-0.157836	0.03059	-0.188427		7.806	7.65	7.3	7.7	-0.1562	0.41841	-0.574608
YPL068C		5.25	5.35	5.3	5.7	0.096624	0.40001	-0.303387		5.773	5.95	6.1	5.9	0.17626	-0.22345	0.399704
YDR139C	RUB1	6.53	6.29	5.8	5.1	-0.241099	-0.74816	0.507063		5.982	6.4	5.4	5.1	0.42068	-0.31298	0.733662
YBR046C	ZTA1	6.89	6.58	6.5	6	-0.311186	-0.46946	0.158271		7.485	7.88	6.9	7.2	0.39347	0.26072	0.132746
YLR387C	REH1	7.79	7.51	7.9	7.6	-0.285473	-0.3195	0.0340306		7.892	7.64	7.8	7.9	-0.25309	0.09799	-0.351088
YGR061C	ADE6	10.96	10.83	9.8	9.5	-0.134044	-0.24057	0.10653		10.395	10.43	9.3	10	0.03528	0.69876	-0.663486
YDR040C	ENA1	9.21	8.92	8.9	9	-0.287876	0.08812	-0.375995		8.985	8.98	9	9.1	-0.01037	0.08013	-0.0905
YGR263C	SAY1	6.24	5.94	5.8	5.7	-0.298966	-0.10962	-0.189344		6.671	6.11	6.3	6.3	-0.55806	0.00321	-0.56127
YBR288C	APM3	7.6	7.25	7.8	7.5	-0.350827	-0.29769	-0.0531406		7.437	7.08	7.7	7.7	-0.36159	0.03704	-0.398624
YLR149C		5.38	6.25	6.4	6.6	0.864652	0.28643	0.578222		5.81	6.77	5.8	6.9	0.95708	1.09413	-0.137057
YDR141C	DOP1	8.61	8.24	7.6	7.9	-0.373131	0.27643	-0.649557		8.304	7.73	7.5	7.9	-0.57792	0.44844	-1.02636
YKL089W	MIF2	5.7	5.24	6.1	6.3	-0.452068	0.19762	-0.649691		5.184	5.72	5.5	5.9	0.539	0.39624	0.142756
YJR097W	JJJ3	3.99	4.67	5.1	5.5	0.679462	0.48091	0.198555		5.123	6.09	5.6	6.2	0.96974	0.60024	0.369504
YNL069C	RPL16B	12.54	12.47	11.4	11	-0.067987	-0.37558	0.30759		12.294	12.2	11.3	10.8	-0.09639	-0.48441	0.388016
YNL154C	YCK2	8.82	8.77	8.5	8.5	-0.049346	-0.00717	-0.0421765		8.523	8.29	8.4	8.1	-0.23664	-0.2433	0.006655
YER177W	BMH1	11.8	11.4	11.3	10.6	-0.397208	-0.72908	0.331868		11.953	11.55	11.7	10.5	-0.40137	-1.16281	0.761444
YDR176W	NGG1	6.39	6.6	7.6	7.7	0.211548	0.06675	0.144799		6.455	6.39	6.6	7.4	-0.06645	0.86733	-0.933779
YLR019W	PSR2	7.35	7.26	7.2	6.9	-0.089053	-0.26502	0.175965		6.744	6.87	6.8	6.1	0.12361	-0.71986	0.843468
YGR056W	RSC1	6.85	7	7.1	7.5	0.149756	0.38096	-0.231207		6.405	7.08	6.9	7.4	0.67217	0.47757	0.194597
YDR011W	SNQ2	9.12	9.33	8.6	9.1	0.213678	0.49629	-0.282609		9.206	9.39	8.2	8.9	0.18223	0.62584	-0.443606
YOL155C	HPF1	9.44	10.53	7.8	8.4	1.08699	0.64746	0.439534		8.957	9.34	7.3	7.3	0.3848	0.02875	0.356047
YKL151C		6.88	7.24	7.5	6.8	0.363256	-0.6958	1.05905		7.802	8.05	7.8	7.1	0.24907	-0.68021	0.929284
YLR091W	GEP5	4.18	4.75	5.4	5.4	0.578533	0.05628	0.522254		4.237	5.1	6.2	5.6	0.85918	-0.634	1.49318
YCR052W	RSC6	7.67	7.68	7.7	7.4	0.01312	-0.27227	0.285389		7.619	7.53	7.9	7.6	-0.09377	-0.21367	0.1199
YAR050W	FLO1	3.49	6.31	6	7.1	2.8234	1.1046	1.71879		2.383	5.74	6.2	5.8	3.35364	-0.38229	3.73593
YBR251W	MRPS5	6.62	6.46	6.7	6.7	-0.160614	-0.02415	-0.136465		6.735	6.58	7	6.8	-0.15277	-0.19485	0.042085
YPL039W		5.02	4.93	5.7	6	-0.088139	0.26022	-0.348361		5.219	3.7	5.8	5.9	-1.52101	0.11433	-1.63534
YIL117C	PRM5	6.91	7.76	6.9	7.8	0.85284	0.91968	-0.0668394		7.472	9.17	7.7	9.2	1.70181	1.46552	0.236294
YHR132W-A	IGO2	6.21	5.49	5.6	5.6	-0.725141	-0.06132	-0.66382		5.923	6.32	5.8	5.6	0.39824	-0.25688	0.655127
YFR013W	IOC3	7.3	7.21	7.5	7.7	-0.094077	0.2078	-0.30188		7.129	7.1	7.5	7.5	-0.03237	-0.01783	-0.014535
YDR099W	BMH2	10.59	10.52	8.9	8.7	-0.072048	-0.19406	0.122015		10.586	10.59	8.9	8.7	0.00074	-0.22201	0.222742
YIL034C	CAP2	8.56	8.73	7.5	7.5	0.171012	-0.0441	0.215111		8.571	8.8	7.6	7.6	0.22728	-0.0137	0.240986
YHR059W	FYV4	4.92	4.87	5.4	5.2	-0.050391	-0.24051	0.190121		5.728	5.52	5.4	4.8	-0.20313	-0.64783	0.444705
YOL111C	MDY2	7.89	7.37	7	6.7	-0.525134	-0.29412	-0.231013		7.996	7.5	7.2	6.9	-0.4955	-0.26314	-0.232366
YCR016W		6.9	6.75	6.2	5.9	-0.14822	-0.31946	0.171241		6.797	6.35	4.9	6	-0.4466	1.14269	-1.58929
YDR330W	UBX5	6.81	6.61	6.6	6.8	-0.202693	0.13992	-0.342614		6.765	6.76	6.8	6.5	-0.00039	-0.29991	0.299519
YPR176C	BET2	6.65	6.41	7.2	6.7	-0.240281	-0.46302	0.222738		6.709	6.72	7.6	7	0.01397	-0.62546	0.639434
YGR012W		7.05	6.87	6.9	6.5	-0.184722	-0.4275	0.242775		7.532	6.96	7.3	6.6	-0.57421	-0.74295	0.168744
YDR213W	UPC2	5.95	6.32	7	7.2	0.374844	0.24663	0.128216		6.764	6.85	7.5	7.6	0.09044	0.06974	0.020696
YHL035C	VMR1	5.17	5.28	7.5	7.8	0.100768	0.25415	-0.153383		4.2	6.02	7	7.8	1.82336	0.73321	1.09016
YML074C	FPR3	10.23	9.65	8.7	8.4	-0.581821	-0.38108	-0.20074		10.102	9.51	8.7	7.9	-0.59576	-0.74204	0.146283
YIL070C	MAM33	7.57	6.84	6.4	6.1	-0.725856	-0.35479	-0.371063		7.943	6.72	6.2	5.3	-1.21824	-0.90894	-0.309301
YNL110C	NOP15	7.74	7.63	7.3	7.5	-0.109991	0.12967	-0.239657		7.336	7.39	6.8	7.5	0.05829	0.67411	-0.615819
YMR090W		5.26	5.17	6.3	5.9	-0.089416	-0.3945	0.305086		6.206	7.04	6.7	7	0.83625	0.36748	0.468776
YCL002C		4.5	5.57	6.5	6.5	1.06976	-0.00771	1.07747		4.647	5.13	6.3	6.3	0.4863	-0.08052	0.56682
YLR459W	GAB1	7.8	7.74	7.7	7.5	-0.055887	-0.18789	0.131999		7.999	6.86	7.9	7.1	-1.14219	-0.82942	-0.312768
YOR092W	ECM3	7.1	7.43	7	7.1	0.327634	0.05984	0.267797		7.454	7.48	7.5	7.1	0.02601	-0.35585	0.381858
YNL231C	PDR16	8.13	7.63	8.2	8.5	-0.507196	0.29675	-0.803944		8.13	7.73	7.9	8.3	-0.39601	0.38152	-0.777524
YDR055W	PST1	9.43	9.8	9.1	9.5	0.377443	0.41762	-0.0401788		9.871	10.67	9.5	9.8	0.7991	0.2985	0.500592
YPR011C		4.43	5.38	6.7	6.7	0.949641	0.05321	0.896429		5.236	5.7	7.1	7.1	0.46844	0.00091	0.467527
YGR254W	ENO1	14.99	14.28	12.5	11.5	-0.703159	-0.99934	0.296179		14.958	14.6	12.4	11.5	-0.3617	-0.88115	0.519452
YLL031C	GPI13	8.25	8.07	8.3	8.1	-0.180114	-0.23099	0.0508777		8.252	6.87	8.1	7.4	-1.37964	-0.69995	-0.679694
YER098W	UBP9	4.04	4.9	5.8	6.1	0.867761	0.29632	0.571445		4.663	4.98	5.4	5.9	0.31383	0.53864	-0.224814
YKR096W		7.2	7.28	7.4	7.7	0.078126	0.29563	-0.217506		6.967	7.49	7.2	7.8	0.52373	0.58466	-0.060924
YDL039C	PRM7	0.77	4.5	3.2	5.5	3.73833	2.35043	1.3879		1.364	5.95	5.9	6.4	4.58751	0.49634	4.09117
YMR125W	STO1	9.27	8.95	8.6	8.7	-0.31401	0.06892	-0.382927		8.912	8.47	8	8.2	-0.44396	0.25104	-0.694998
YPR110C	RPC40	9.49	9.17	8.8	8.7	-0.325524	-0.12625	-0.19927		9.011	8.89	8.7	8.7	-0.11606	-0.06985	-0.04621
YNL330C	RPD3	7.71	7.33	7.7	7.6	-0.377229	-0.09793	-0.2793		7.491	7.53	7.8	7.3	0.03963	-0.49944	0.539073
YGR157W	CHO2	10.62	9.89	9.5	8.7	-0.728891	-0.76689	0.0379939		9.169	8.71	8.6	7.8	-0.45631	-0.78282	0.326513
YLL013C	PUF3	8.27	8.31	7.4	7.6	0.032979	0.26333	-0.230356		8.074	7.67	7.5	7.6	-0.39897	0.10756	-0.506535
YNL055C	POR1	11.55	12.06	9.8	10	0.513258	0.21003	0.303223		11.81	12.08	10.1	9.8	0.27386	-0.31764	0.591495
YOL098C		8.91	8.65	8.5	8.6	-0.256956	0.06012	-0.317071		8.829	8.48	8.1	8.3	-0.35145	0.19244	-0.543891
YKL014C	URB1	8.9	8.96	8.2	8.5	0.062813	0.26403	-0.201215		8.585	8.09	7.2	8.3	-0.49422	1.09442	-1.58865
YOR319W	HSH49	5.37	5.26	5.8	5.7	-0.106285	-0.12732	0.0210348		5.547	5.96	5.7	5.8	0.40986	0.02968	0.380172
YDR275W	BSC2	4.77	5.05	6.8	6.8	0.280262	-0.03532	0.315587		3.964	5.5	6.3	6	1.53991	-0.3095	1.84941
YKL018C-A		4.99	5.62	4.7	4.8	0.626567	0.04635	0.580221		4.845	6.21	5.2	4.9	1.3644	-0.28471	1.64912
YNL213C	RRG9	2.6	3.7	5	5.2	1.10441	0.27762	0.826797		3.732	4.11	4.8	4.8	0.3736	0.05304	0.320568
YDR077W	SED1	14.13	14.83	11.9	12.4	0.705282	0.46116	0.244126		14.322	15.08	12.2	12.7	0.75808	0.46671	0.291366
YPR033C	HTS1	10.44	10.23	9.3	9.1	-0.215621	-0.18513	-0.0304866		10.257	9.79	9.1	8.7	-0.46425	-0.42782	-0.03643
YGR074W	SMD1	5.81	6.21	5.7	5.7	0.394787	0.00692	0.387871		6.36	6.07	6.1	5.8	-0.28781	-0.35257	0.06475
YKR078W		5.64	5.43	6.1	6.1	-0.2139	0.06167	-0.275566		5.232	5.24	5.3	6.5	0.00685	1.13705	-1.1302
YBR237W	PRP5	5.35	5.9	7.1	7.5	0.550654	0.354	0.196654		5.337	6.32	6.9	7.9	0.98468	1.03365	-0.04897
YPL219W	PCL8	5.78	5.64	5.8	5.8	-0.143385	0.02594	-0.169324		5.92	5.93	5.7	5.6	0.00889	-0.15158	0.160463
YDR312W	SSF2	6.9	7.06	6.8	6.8	0.155252	0.04254	0.11271		6.84	7.04	6.7	7.4	0.19749	0.72842	-0.530933
YMR238W	DFG5	7.72	8.48	7.4	7.8	0.763443	0.42457	0.338876		7.465	7.86	7.1	7.6	0.39227	0.53315	-0.14088
YGL018C	JAC1	5.28	5.08	5	5	-0.197211	-0.09049	-0.106721		6.072	6.43	5.3	5.9	0.35833	0.59439	-0.236054
YER032W	FIR1	7	6.49	6.5	6.7	-0.515495	0.17936	-0.694859		6.749	6.49	6.7	6.3	-0.26186	-0.46372	0.201854
YKL006C-A	SFT1	5.21	5.69	5.8	5.3	0.476423	-0.51641	0.992837		5.67	6.22	5.6	5.6	0.54642	-0.04078	0.587198
YCR034W	FEN1	9.95	9.77	8.7	8.2	-0.178716	-0.4712	0.292488		9.64	8.74	8.3	7.1	-0.89976	-1.20562	0.305864
YDR110W	FOB1	6.26	6.26	6.7	6.9	-0.00235	0.19543	-0.197776		5.953	6.05	6.2	6.7	0.09199	0.4709	-0.378909
YDR356W	SPC110	7.07	6.5	6.5	6.8	-0.568591	0.30179	-0.870384		6.575	6.01	4.7	5.8	-0.56144	1.13525	-1.69669
YPL093W	NOG1	9.59	9.79	8.9	9.2	0.194204	0.26976	-0.075557		9.091	9.08	9.3	9.5	-0.01471	0.1984	-0.213109
YGR113W	DAM1	5.62	5.79	6.7	6.9	0.162426	0.14115	0.0212805		6.62	6.47	7	6.4	-0.14599	-0.63998	0.493995
YNL176C		6.77	7.36	7.2	7.6	0.590265	0.37637	0.2139		6.808	7.32	7	7	0.50759	0.04155	0.466045
YGR232W	NAS6	7.55	7.2	6.7	6.2	-0.347097	-0.48793	0.140833		7.135	6.96	6.7	5.9	-0.17582	-0.7969	0.621079
YNL099C	OCA1	6.63	6.41	6.7	6.5	-0.217479	-0.15333	-0.0641496		6.584	6.44	6.7	6.5	-0.14491	-0.18523	0.040322
YMR119W	ASI1	6.76	6.76	7.8	7.6	0.005767	-0.25002	0.255786		6.729	6.8	7.6	7.4	0.07475	-0.21999	0.294743
YNL257C	SIP3	7.18	6.89	8	7.9	-0.290645	-0.07048	-0.220161		6.276	6.53	7.1	7.6	0.25228	0.53817	-0.285891
YDR033W	MRH1	12.63	12.99	11.7	11.4	0.360243	-0.27118	0.631419		12.368	12.19	11.3	10.6	-0.17609	-0.72562	0.549537
YLR190W	MMR1	7.42	7.67	7.5	7.9	0.251852	0.40819	-0.156341		7.616	6.99	7.5	7.1	-0.62729	-0.36618	-0.261108
YNL011C		5.83	5.59	7.4	7.3	-0.239133	-0.10958	-0.129557		5.854	5.41	7.3	7.5	-0.44452	0.1399	-0.584426
YOR193W	PEX27	3.7	3.94	5.8	6	0.23989	0.17021	0.0696819		5.094	4.67	6.5	6.5	-0.4239	0.05284	-0.47674
YBR071W		6.82	6.37	6.6	6.5	-0.447429	-0.16207	-0.285359		7.355	6.89	7.1	6.2	-0.46347	-0.91164	0.448176
YMR191W	SPG5	7.29	7.52	6.9	7.2	0.230557	0.23689	-0.0063363		7.524	7.3	7.5	7.3	-0.22121	-0.19658	-0.024632
YHR194W	MDM31	3.86	4.94	6.6	6.7	1.07572	0.10975	0.965968		4.169	4.63	6.5	6.1	0.46417	-0.34982	0.813997
YLR061W	RPL22A	11.96	11.76	11.1	10.6	-0.207005	-0.57203	0.365026		11.675	11.3	11.1	10.3	-0.37925	-0.75697	0.377719
YMR143W	RPS16A	11.61	11.73	10.5	10.2	0.121886	-0.34433	0.466212		11.278	11.43	10.1	9.4	0.14758	-0.65155	0.799136
YBR191W	RPL21A	12.11	12.05	11.7	11.1	-0.05707	-0.5682	0.511127		11.75	11.6	11.9	11.3	-0.14751	-0.51993	0.372417
YEL029C	BUD16	6	6.08	6.6	6.5	0.085871	-0.16327	0.249142		6.044	6.18	6.7	6.9	0.13307	0.22766	-0.094592
YML021C	UNG1	6.91	6.66	6.6	6.2	-0.249096	-0.43019	0.181096		6.873	6.95	6.9	6.5	0.07944	-0.39972	0.479167
YPR022C		7.25	6.71	7.7	7.7	-0.537958	0.02306	-0.561016		6.627	6.72	8	7.9	0.09684	-0.14442	0.241263
YDR462W	MRPL28	6.26	6.11	6.2	6.3	-0.148887	0.07914	-0.228029		6.655	6.74	6.6	6.7	0.08265	0.0737	0.00895
YJL141C	YAK1	7.7	8.03	8.4	8.2	0.328429	-0.14422	0.472645		7.818	8.39	8.2	8.1	0.56925	-0.08672	0.655967
YML120C	NDI1	7.24	8.26	7.3	7.9	1.02354	0.64698	0.376568		7.375	7.92	6.9	7.3	0.54482	0.37157	0.173249
YDR167W	TAF10	6.77	6.86	7	7	0.089844	0.08529	0.0045498		6.32	6.31	7.5	7.3	-0.00887	-0.16572	0.156854
YOR380W	RDR1	3.84	4.43	6.1	6.7	0.592361	0.63312	-0.0407586		3.929	4.85	6.7	6.7	0.92098	-0.00228	0.923259
YNL096C	RPS7B	11.2	11.13	9.8	9.5	-0.06622	-0.34595	0.279726		11.071	10.86	9.6	9.4	-0.21047	-0.18267	-0.027798
YBR024W	SCO2	6.48	5.86	6.1	5.8	-0.621263	-0.25247	-0.368796		6.179	6.33	5.9	6.3	0.15284	0.40772	-0.254885
YOL122C	SMF1	7.46	7.59	7.4	7.4	0.128705	0.04186	0.0868453		7.671	7.27	7.2	7.2	-0.40112	0.05309	-0.454218
YJL206C		5.09	5.3	5.7	5.9	0.205612	0.20947	-0.0038533		5.312	6.34	6.5	6.9	1.02862	0.41983	0.608796
YDL183C		4.5	4.35	5.4	5.2	-0.150296	-0.12819	-0.0221022		4.604	5.45	5.8	5.1	0.84603	-0.62781	1.47384
YNR028W	CPR8	6.63	6.75	7	6.6	0.121875	-0.41131	0.533188		7.211	6.61	6.7	6.1	-0.59833	-0.61456	0.016231
YPL208W	RKM1	6.94	6.94	6.9	7	0.001966	0.07681	-0.0748482		6.87	6.34	7	6.7	-0.52933	-0.33823	-0.191104
YIL061C	SNP1	5.27	5.59	5.5	6	0.322671	0.51369	-0.191023		5.603	6.01	5.7	6.5	0.40351	0.76434	-0.360825
YJL004C	SYS1	6.71	6.35	6.2	6	-0.355559	-0.24815	-0.107404		6.213	6.48	5.8	6	0.2693	0.19735	0.071952
YGL251C	HFM1	3.14	5.07	5.9	6.6	1.92382	0.66721	1.25661		3.007	5.75	5.8	7	2.74081	1.14948	1.59133
YMR108W	ILV2	10.97	10.74	9.2	9.2	-0.22835	-0.01015	-0.218203		10.932	10.45	9.3	9.2	-0.48643	-0.06174	-0.424693
YER001W	MNN1	9	7.74	8.8	7.7	-1.26665	-1.15197	-0.114682		8.779	6.68	8.6	7	-2.09368	-1.51807	-0.575617
YGR003W	CUL3	6.47	6.69	6.9	7	0.226571	0.11206	0.114514		6.316	7.23	7	7.3	0.91235	0.30703	0.605324
YER100W	UBC6	7.78	7.74	7.1	6.8	-0.037522	-0.27838	0.240857		8.241	7.63	7.1	7.1	-0.61059	-0.08066	-0.529926
YDR321W	ASP1	9.59	9.19	8.7	8.4	-0.403575	-0.34109	-0.0624859		9.444	8.59	8.9	8.1	-0.84992	-0.88632	0.036398
YMR009W	ADI1	5.23	5.4	5.2	5.9	0.173222	0.65432	-0.481094		6.059	6.26	6.3	6.6	0.2036	0.29724	-0.093639
YPR167C	MET16	3.96	3.95	5.2	5.3	-0.014377	0.11844	-0.132812		4.213	5.23	5.3	5.1	1.01882	-0.21564	1.23447
YOL067C	RTG1	5.38	5.85	5.5	5.4	0.467225	-0.03827	0.505497		4.642	6.11	5.3	5.5	1.46964	0.21204	1.2576
YKL063C		7	6.54	6.3	6.3	-0.4594	-0.02318	-0.436225		6.735	6.45	5.9	6.3	-0.28791	0.37609	-0.664005
YDR527W	RBA50	7.03	6.74	7.3	7.6	-0.284336	0.23394	-0.518276		6.733	7.1	7.6	7.8	0.37042	0.22603	0.14439
YOR083W	WHI5	5.42	5.51	5.6	5.9	0.086712	0.23829	-0.151574		5.477	5.18	5.8	4.6	-0.29442	-1.22182	0.927397
YKL162C		5.42	5.66	5.2	5.4	0.236178	0.19436	0.0418207		4.947	6.14	4.9	5.5	1.19687	0.54385	0.65302
YJR068W	RFC2	7.22	7.06	7.4	7.3	-0.1623	-0.13493	-0.0273682		7.157	6.34	7.3	6.9	-0.82008	-0.39982	-0.420258
YBR161W	CSH1	6.56	6.58	7.2	7.2	0.025243	-0.00368	0.0289251		6.998	6.85	7.2	6.9	-0.14823	-0.29025	0.142027
YBL084C	CDC27	6.29	6.65	6.8	6.8	0.355416	-0.00651	0.361921		6.363	6.89	6.6	6.7	0.52349	0.14159	0.3819
YDL028C	MPS1	5.74	6.09	6.9	7.1	0.347572	0.19131	0.156258		6.222	6.59	6.7	6.6	0.36847	-0.17398	0.542445
YLR383W	SMC6	5.81	5.95	6.7	6.6	0.146844	-0.05748	0.204323		5.756	5.89	5.6	6.2	0.13459	0.57219	-0.437595
YDR440W	DOT1	5.85	5.41	6.4	6.3	-0.43718	-0.13718	-0.299999		5.596	5.13	5.7	6	-0.4647	0.21204	-0.676734
YDR044W	HEM13	7.76	7.75	6.4	6.4	-0.016776	-0.01585	-0.0009305		7.535	7.11	6.2	5.4	-0.42675	-0.78194	0.355192
YNL022C		6.84	6.59	7.1	7.1	-0.241717	-0.06902	-0.1727		6.535	6.78	7.4	7.5	0.24815	0.16957	0.078583
YOL089C	HAL9	6.58	6.52	6.9	6.8	-0.067342	-0.12813	0.0607875		6.577	6.5	6.4	6.6	-0.07581	0.24727	-0.323077
YKL005C	BYE1	5.66	5.7	6.9	6.9	0.039819	0.05396	-0.0141425		5.868	5.62	6.7	6.8	-0.2451	0.0365	-0.281594
YKL104C	GFA1	10.18	10.22	9.1	9.3	0.044964	0.13641	-0.091443		10.123	9.9	9.2	9	-0.21896	-0.19355	-0.02541
YDR145W	TAF12	7.81	7.54	7.9	8	-0.271512	0.14919	-0.420706		7.614	7.77	7.8	8.2	0.15921	0.41792	-0.258717
YCR061W		8.53	8.72	6.9	7.1	0.1891	0.18012	0.0089847		9.032	9.34	7.4	7.4	0.31275	0.02395	0.288799
YAR027W	UIP3	7.43	7.26	7.2	7.4	-0.175238	0.26484	-0.440083		7.642	7.87	7.5	7.3	0.22489	-0.14113	0.36602
YHR048W	YHK8	1.49	3.22	4.1	5.4	1.72949	1.29539	0.434095		2.916	3.84	5.9	6.1	0.92512	0.15669	0.768434
YPR088C	SRP54	9.08	8.63	9	8.8	-0.451018	-0.21021	-0.24081		8.914	8.68	9.2	9	-0.22963	-0.22015	-0.009487
YIL043C	CBR1	9.59	9.2	9.3	8.9	-0.388682	-0.30962	-0.0790662		9.384	8.48	9.3	8.5	-0.90565	-0.86008	-0.045563
YGL009C	LEU1	12.43	11.26	10.6	9.3	-1.17624	-1.33009	0.153845		12.166	10.26	9.8	8.2	-1.90136	-1.64706	-0.2543
YGL108C		5.14	4.6	4.9	5	-0.535137	0.07343	-0.608565		5.589	5.76	5	5.1	0.16998	0.06616	0.103816
YJL127C	SPT10	5.61	5.67	6.3	6.7	0.061099	0.39723	-0.336133		5.998	6.58	6.3	7.2	0.58005	0.83538	-0.255322
YHR012W	VPS29	6.94	6.98	6.8	6.7	0.038698	-0.09759	0.136287		6.782	6.71	7.1	6.5	-0.07371	-0.5721	0.498395
YJR086W	STE18	7.21	6.86	7.3	6.8	-0.346377	-0.40497	0.0585957		7.604	7.73	8.2	7.9	0.12118	-0.24208	0.363256
YNL264C	PDR17	7.04	6.97	6.7	6.6	-0.067624	-0.06052	-0.007103		7.077	6.92	6.8	7	-0.16246	0.15996	-0.32242
YER067W	RGI1	5.89	4.56	5.3	5.1	-1.32635	-0.20386	-1.12249		6.91	6.08	5.4	4.9	-0.83255	-0.47774	-0.354807
YGR021W		5.84	4.56	6.3	5.3	-1.27287	-1.04114	-0.23173		5.621	5.84	6.3	5.2	0.21505	-1.04077	1.25581
YLR109W	AHP1	13.28	12.92	11.6	10.8	-0.356209	-0.81056	0.454351		12.906	13.16	11.5	10.7	0.24955	-0.78835	1.0379
YDR246W	TRS23	6.36	6.58	5.5	5.8	0.214422	0.29797	-0.0835455		6.57	6.52	5.7	6.2	-0.04586	0.48376	-0.529613
YDR347W	MRP1	7.24	6.78	6.7	6.4	-0.460435	-0.25068	-0.209758		7.274	6.92	6.4	5.7	-0.35525	-0.73696	0.381703
YNL167C	SKO1	6.41	6.71	6.7	6.7	0.292451	-0.03125	0.323699		6.651	6.19	5.9	6.4	-0.46131	0.51053	-0.971841
YJL163C		4.92	5.09	5.8	5.9	0.171112	0.1415	0.0296073		5.642	5.83	6	5.7	0.18624	-0.28475	0.470983
YER166W	DNF1	8.66	8.49	8.2	8	-0.173534	-0.24112	0.067586		8.263	8.07	8.1	8.2	-0.19339	0.09928	-0.292663
YJR094W-A	RPL43B	10.52	10.64	9.7	9.4	0.114645	-0.30381	0.418453		10.553	10.6	9.4	8.8	0.04629	-0.57793	0.624221
YBR006W	UGA2	6.56	6.37	6.3	6.1	-0.191572	-0.20496	0.0133881		6.796	7.46	6.2	6.1	0.66128	-0.17746	0.838745
YLR080W	EMP46	5.65	4.39	5.1	4.8	-1.26039	-0.25901	-1.00138		5.768	6.11	5.4	5.1	0.34677	-0.25408	0.600846
YDL115C	IWR1	6.12	5.33	7	6.7	-0.788826	-0.38915	-0.399679		5.824	5.72	6.6	6.7	-0.10431	0.06068	-0.164988
YHR084W	STE12	7.16	7.09	7.4	7.3	-0.069429	-0.10613	0.0367058		7.158	7.44	6.9	7.8	0.28592	0.98955	-0.703631
YFR002W	NIC96	8.25	8.52	8.2	8.4	0.270347	0.1556	0.114743		8.316	8.54	8.1	8.3	0.2195	0.1072	0.112296
YIL007C	NAS2	5.39	5.29	6	6.2	-0.101326	0.12481	-0.226136		5.8	6.12	7	6.9	0.32021	-0.08207	0.402274
YCL049C		6.37	7.57	5.9	6.8	1.19891	0.9448	0.254106		5.61	6.72	6.1	6.6	1.10494	0.43587	0.669077
YDR189W	SLY1	8.48	8.09	8	7.8	-0.391484	-0.18965	-0.201829		8.397	7.96	8	7.5	-0.43321	-0.53048	0.097268
YPL028W	ERG10	10.39	9.75	9.2	8.6	-0.633593	-0.63143	-0.0021613		10.375	9.62	9.3	8.3	-0.75802	-1.0575	0.299484
YHL039W	EFM1	7.75	7.12	7.6	7.8	-0.63112	0.21487	-0.845989		7.102	6.98	7.8	7.5	-0.12123	-0.26368	0.142451
YER094C	PUP3	8.43	8.75	8.4	8.3	0.322427	-0.18192	0.504348		8.596	8.07	8.5	7.8	-0.52998	-0.6982	0.168216
YJL118W		4.24	4.88	4.4	5.5	0.642904	1.00808	-0.365176		5.003	4.67	5.1	4.9	-0.3318	-0.27382	-0.057979
YDR524C-B		11.78	12.71	11.2	11.2	0.924704	-0.08622	1.01092		11.828	12.26	10.9	9.9	0.43329	-0.98095	1.41424
YGL115W	SNF4	8.1	7.65	8	7.7	-0.456218	-0.33263	-0.123587		7.656	7.56	8.3	7.6	-0.09511	-0.64013	0.545017
YKL191W	DPH2	7.89	7.69	7.9	7.9	-0.198506	-0.01438	-0.184123		7.395	6.27	8.5	8.2	-1.12838	-0.30406	-0.824325
YGR179C	OKP1	5.95	6	6.4	6.3	0.051409	-0.07574	0.12715		5.802	5.83	6.7	6.5	0.03042	-0.26571	0.296131
YOR250C	CLP1	6.18	6.2	6.3	6.5	0.01917	0.16559	-0.146425		6.222	6.66	6.8	7.1	0.43994	0.27118	0.168758
YLR051C	FCF2	6.58	6.62	6.8	6.9	0.038629	0.09628	-0.0576545		6.794	6.83	6.6	7.5	0.03166	0.92505	-0.89339
YOR171C	LCB4	7.83	7.76	7.4	7.6	-0.07944	0.20759	-0.28703		7.575	7.28	7.4	7.2	-0.29712	-0.18089	-0.116229
YCR092C	MSH3	6.34	6.61	7.2	7.2	0.278953	-0.04801	0.326962		6.806	7.16	6.9	7.2	0.35868	0.33001	0.028664
YGR258C	RAD2	6.19	6.05	7.1	7.3	-0.141439	0.156	-0.297436		6.327	7.03	6.7	7.6	0.70256	0.87833	-0.175771
YBR291C	CTP1	5.05	4.56	6.3	6.7	-0.488432	0.39872	-0.88715		5.142	5.27	7.1	7.4	0.12527	0.36827	-0.242997
YFL037W	TUB2	10.61	10.49	9.3	9	-0.12462	-0.34659	0.221974		10.664	9.56	9.4	8.2	-1.09926	-1.18996	0.090699
YHR055C	CUP1-2	9.19	8.32	8.5	8	-0.870001	-0.53678	-0.333225		10.133	10.64	10.2	10.6	0.50453	0.42794	0.076583
YDL237W	AIM6	7.98	7.87	7.5	7.3	-0.109011	-0.23629	0.127277		8.202	7.9	7.9	7.7	-0.30325	-0.25479	-0.048452
YAR018C	KIN3	6.74	7.15	6.9	7.5	0.408563	0.61418	-0.205617		6.743	6.65	7.5	6.8	-0.08929	-0.68359	0.594302
YHR132C	ECM14	8.75	8.77	7.9	8	0.01793	0.08774	-0.069813		8.951	8.58	7.8	7.7	-0.36664	-0.06532	-0.301322
YKL006W	RPL14A	11.92	12.11	11.3	10.8	0.187295	-0.40658	0.593876		11.67	11.86	10.8	10.1	0.18727	-0.68958	0.876849
YPL071C		2.63	3.95	5.6	5.5	1.32211	-0.06397	1.38609		3.802	4.82	5.3	5.4	1.01919	0.0947	0.924488
YMR252C		3.03	2.98	4.9	5	-0.044666	0.09836	-0.143028		4.77	4.21	5.6	5.4	-0.55765	-0.19666	-0.360984
YOR016C	ERP4	7.47	7.59	6.9	6.4	0.122732	-0.49837	0.621099		7.352	7.24	7.2	6.7	-0.11491	-0.4741	0.359192
YMR137C	PSO2	4.58	5.28	6	6	0.698965	-0.03088	0.729842		5.097	5.53	5.3	6.3	0.4357	0.96947	-0.533769
YGL036W		7.19	7.66	7.9	7.9	0.470843	0.05636	0.414482		7.145	7.5	7.1	7.8	0.35415	0.7761	-0.421949
YGL234W	ADE5,7	10.11	10.22	10.1	9.5	0.105298	-0.54283	0.648125		10.192	10.34	9.7	10.2	0.14694	0.51533	-0.368389
YGL151W	NUT1	7.56	7.79	7.9	8.2	0.230177	0.30632	-0.0761437		7.859	7.88	7.3	8	0.01854	0.65231	-0.633773
YDR378C	LSM6	7.2	6.91	6.9	6.7	-0.294092	-0.22855	-0.0655433		6.82	7.11	6.7	6.3	0.28478	-0.42789	0.712668
YOR052C		7.56	7.53	7.2	7.3	-0.02955	0.11054	-0.140093		8.306	8.02	7.3	6.8	-0.28689	-0.57334	0.286447
YBR093C	PHO5	8.4	7.9	7	6.2	-0.500277	-0.80183	0.301552		8.943	7.31	7.7	6	-1.63202	-1.68301	0.050989
YLR370C	ARC18	8.12	8.2	7.6	7	0.080199	-0.61445	0.694647		8.516	8.4	7.7	7.1	-0.11701	-0.66298	0.545969
YLR172C	DPH5	8.8	9.1	7.7	7.6	0.299793	-0.06862	0.368409		8.804	8.7	7.9	7.5	-0.10901	-0.43769	0.328677
YCL032W	STE50	5.1	5.82	6.3	6.4	0.719973	0.09828	0.621688		5.434	5.97	6.5	6.8	0.54059	0.29421	0.246382
YBR138C		5.94	6.7	6.6	6.9	0.754589	0.29009	0.464504		6.579	5.85	6.1	6.2	-0.72895	0.15378	-0.882736
YDL116W	NUP84	7.89	7.91	8.2	8.2	0.01991	0.02946	-0.0095502		7.962	7.83	7.7	8	-0.12738	0.31962	-0.447002
YJR130C	STR2	6.1	6.26	7.1	7.3	0.1562	0.17596	-0.0197619		5.906	6.8	6.9	7.6	0.89799	0.67598	0.222014
YMR216C	SKY1	7.01	7.5	7.7	8.3	0.490252	0.6327	-0.142443		7.465	7.41	8	8.4	-0.05046	0.38182	-0.432285
YNL158W	PGA1	6.12	6.81	5.9	6.3	0.691111	0.3542	0.336908		6.421	6.81	6.1	5.5	0.39174	-0.51838	0.910124
YPL283C	YRF1-7	9.54	10.73	11.6	12	1.18852	0.38026	0.808257		8.384	10.13	11.7	11.7	1.74367	-0.00054	1.74421
YPL134C	ODC1	5.41	6.09	6	6.2	0.679203	0.14448	0.534724		5.694	5.74	6.3	6	0.04343	-0.33881	0.382234
YJL019W	MPS3	6.64	6.52	5.9	6.4	-0.121924	0.45393	-0.57585		6.486	5.54	5.8	5.9	-0.94514	0.12021	-1.06536
YHR198C	AIM18	5.98	6.29	6.8	6.6	0.304482	-0.24643	0.55091		6.769	6.87	7	6.6	0.09648	-0.41509	0.511573
YDR194C	MSS116	8.2	7.59	7.9	7.5	-0.608994	-0.36341	-0.245584		7.593	7.07	6.8	7.2	-0.51879	0.3617	-0.88049
YPR158W	CUR1	6.2	5.88	5.9	5.8	-0.312265	-0.09341	-0.218858		6.773	7.14	6.1	6.5	0.37142	0.35216	0.019265
YGR197C	SNG1	5.28	5.71	6.2	6.6	0.425705	0.36175	0.0639512		5.652	5.92	6.3	6	0.26645	-0.3376	0.604047
YPL017C	IRC15	4.24	5.23	5.3	5.4	0.986131	0.05781	0.928318		5.379	6.49	6.1	6.8	1.11171	0.70603	0.405684
YCL058W-A	ADF1	5.16	5.28	5.5	6.1	0.128862	0.54048	-0.411619		5.601	5.72	6.7	6.7	0.11847	0.00924	0.109236
YLR433C	CNA1	7.27	7.09	7.2	7.1	-0.180071	-0.1384	-0.0416735		7.343	6.82	7.4	7.3	-0.52084	-0.15363	-0.367213
YDL108W	KIN28	6.3	5.93	6.7	6.8	-0.368037	0.09637	-0.464407		6.332	6.28	7.2	7.1	-0.04847	-0.05167	0.003196
YIL092W		4.96	4.93	6	6.5	-0.033419	0.49576	-0.529174		4.526	5.31	5.9	6.4	0.78723	0.55693	0.230304
YDL170W	UGA3	5.35	6.29	6.6	7.2	0.932641	0.5908	0.34184		6.008	6.81	7.1	7.6	0.80653	0.44475	0.361779
YGL216W	KIP3	6.37	6.63	6.8	6.8	0.257795	0.02477	0.233023		6.951	6.45	7.2	6.8	-0.49826	-0.40142	-0.096849
YML096W		5.87	5.66	6.6	6.8	-0.214449	0.19263	-0.407075		5.763	5.47	6.4	6.6	-0.29003	0.26506	-0.555086
YBL099W	ATP1	11.12	11.87	9.4	10	0.74875	0.57884	0.169906		10.851	11.19	9.2	9.4	0.33616	0.14916	0.187002
YGL050W	TYW3	5.47	5.91	6.2	6.3	0.439734	0.02314	0.416591		6.406	6.33	6.6	6.5	-0.07889	-0.08677	0.007885
YCL054W	SPB1	8.4	8.41	7.6	8.1	0.010025	0.44141	-0.431388		7.802	7.79	6.7	8	-0.01452	1.28671	-1.30123
YMR270C	RRN9	4.93	5.32	6.9	6.9	0.392027	0.02615	0.365875		5.275	4.85	7.1	6.5	-0.4263	-0.58652	0.160221
YAL012W	CYS3	10.98	10.84	9.5	9.1	-0.142902	-0.37201	0.229104		10.492	10.46	9.3	9.1	-0.0328	-0.19243	0.159629
YLR114C	AVL9	7.39	7.34	7.6	7.6	-0.045827	-0.00474	-0.0410893		7.119	6.63	6.9	7.4	-0.48823	0.44043	-0.928663
YOL058W	ARG1	9.19	7.99	7.8	6.8	-1.19994	-0.99996	-0.199979		9.167	8.78	8.1	7.9	-0.38241	-0.11955	-0.262856
YGL014W	PUF4	7.96	7.94	7.7	7.8	-0.0275	0.14792	-0.175425		7.323	7.01	7.5	7.7	-0.31209	0.15396	-0.466056
YKL090W	CUE2	3.77	4.74	6.4	6.3	0.966263	-0.05385	1.02011		4.275	4.92	6.1	6.6	0.64783	0.57479	0.073039
YOR070C	GYP1	5.96	6.49	7.2	7.3	0.526326	0.16014	0.366187		6.398	6.78	7.5	7.2	0.37961	-0.31994	0.699549
YLR073C	RFU1	5.06	6.02	6.1	6.1	0.967322	0.01886	0.948465		5.685	6.25	6.5	6.2	0.55986	-0.31135	0.871212
YEL052W	AFG1	6.92	6.84	7.3	7.5	-0.081541	0.23149	-0.313032		6.746	6.86	7.2	7	0.11321	-0.24888	0.362089
YAL056W	GPB2	6	6.81	7.9	8	0.802891	0.1533	0.649593		5.697	6.37	7.2	7.6	0.6699	0.39668	0.273228
YER159C	BUR6	6.64	6.46	7	7.4	-0.185485	0.37603	-0.561518		6.965	7.42	7.3	7.9	0.45882	0.61254	-0.15372
YJR156C	THI11	4.08	5.29	4.8	4.4	1.20968	-0.41798	1.62766		4.922	6.32	5.3	5.2	1.39985	-0.12896	1.52881
YGR078C	PAC10	7.77	7.45	6.8	6.5	-0.321789	-0.32179	5.2e-06		7.892	7.39	7.3	7.3	-0.50445	-0.01817	-0.486281
YJR031C	GEA1	7.71	7.4	7.5	7.8	-0.316212	0.25412	-0.570328		7.649	6.54	7.6	7.4	-1.11302	-0.195	-0.918015
YDL017W	CDC7	5.77	5.62	5.8	6.2	-0.150648	0.39128	-0.541929		6.163	6.09	5.9	6.3	-0.07241	0.45824	-0.53065
YNR035C	ARC35	9.17	8.99	8.5	8.2	-0.177724	-0.24099	0.0632657		9.452	9.29	8.7	8	-0.16604	-0.66637	0.500333
YMR036C	MIH1	5.83	5.63	6.1	6.6	-0.205045	0.45517	-0.66021		5.049	4.98	6.4	6.5	-0.06999	0.09264	-0.162635
YPL053C	KTR6	7.8	8.07	8	7.9	0.263338	-0.06518	0.328521		7.602	7.57	7.7	8	-0.03337	0.27654	-0.309914
YKL018W	SWD2	6.7	6.49	6.6	7	-0.211815	0.3337	-0.545515		6.728	6.98	7.3	7.3	0.25378	0.0178	0.235974
YER184C		1.5	3.7	5.8	6.6	2.20114	0.76958	1.43156		1.855	4.05	6.1	6.3	2.19598	0.1872	2.00877
YML069W	POB3	8.8	8.43	8.6	8.5	-0.376939	-0.10879	-0.268145		8.637	8.21	8	8.2	-0.42674	0.19994	-0.626681
YOR340C	RPA43	8.4	8.07	7.5	7.2	-0.335739	-0.2577	-0.0780425		7.89	7.66	7.7	7.8	-0.225	0.07303	-0.298026
YDL143W	CCT4	9.61	9.29	9	8.9	-0.31882	-0.06992	-0.248904		9.163	8.63	8.8	8.4	-0.53331	-0.45518	-0.078128
YGL162W	SUT1	4.56	5.11	4.5	5.8	0.545108	1.29419	-0.749086		4.991	5.82	4.4	5.1	0.82791	0.67369	0.154219
YJL181W		5.6	5.87	6.8	6.5	0.271047	-0.30956	0.580602		5.822	5.44	5.9	5.3	-0.38406	-0.55975	0.175685
YAR009C		12.6	12.59	13.3	12.7	-0.012392	-0.55565	0.543258		12.565	12.75	13	13.3	0.18146	0.34152	-0.160064
YGL063W	PUS2	3.16	3.48	5.5	5.9	0.317635	0.3851	-0.0674648		2.841	4.18	5.7	5.7	1.33509	0.02361	1.31148
YFL004W	VTC2	9.2	8.55	8.5	8.2	-0.65533	-0.3789	-0.27643		8.505	7.47	8.2	8.1	-1.03793	-0.16377	-0.874165
YJL062W-A	COA3	6.37	6.14	5.9	5.3	-0.225071	-0.6742	0.449132		6.696	6.34	6	5.2	-0.35106	-0.80533	0.454273
YIR001C	SGN1	6.78	6.59	5.7	5.8	-0.187647	0.13781	-0.325461		6.348	6.73	5.7	6.1	0.38096	0.39753	-0.016564
YHR022C		1.18	1.85	4.3	3.7	0.668293	-0.60273	1.27102		4.654	7.48	6	7.2	2.82258	1.24451	1.57807
YDL204W	RTN2	5.91	5.5	5.7	5.5	-0.410954	-0.24497	-0.165985		6.892	7.64	5.5	5.3	0.74846	-0.18897	0.937427
YLR127C	APC2	5.23	5.73	6.5	6.3	0.507007	-0.28491	0.79192		5.527	5.83	6.1	6.7	0.30318	0.61178	-0.308602
YMR104C	YPK2	5.8	6.99	6.8	8.1	1.18968	1.37122	-0.181547		5.271	7.53	6.5	8.3	2.26241	1.7918	0.470605
YLR325C	RPL38	11.25	11.37	10.3	9.9	0.116896	-0.41643	0.533326		11.355	11.36	9.7	9.4	0.00337	-0.2801	0.28347
YMR243C	ZRC1	9.5	9.3	9.5	9.1	-0.20438	-0.41853	0.214152		9.291	8.85	9.2	8.9	-0.44375	-0.25979	-0.183957
YPL240C	HSP82	12.57	10.92	10.2	8.8	-1.64688	-1.37775	-0.269128		14.161	12.57	11.3	10.1	-1.58616	-1.22376	-0.3624
YOR007C	SGT2	10.69	9.87	9.6	8.9	-0.817922	-0.63733	-0.180597		10.94	10.21	10.2	9.5	-0.73107	-0.75612	0.025046
YIL128W	MET18	7.8	7.95	7.6	7.6	0.1455	0.00725	0.138255		7.537	7.69	7.4	7.6	0.15222	0.23746	-0.085241
YGL126W	SCS3	6.98	6.78	7.6	7.8	-0.194839	0.1114	-0.306238		6.853	6.05	8	7.2	-0.79949	-0.79792	-0.00157
YPL090C	RPS6A	13.12	12.82	12.3	11.8	-0.299332	-0.50483	0.205496		12.763	12.56	12.2	11.5	-0.19838	-0.69816	0.499778
YNL286W	CUS2	4.86	4.91	6	5.7	0.050322	-0.27915	0.32947		5.263	5.44	6.3	6.4	0.17825	0.12807	0.050178
YGL225W	VRG4	10.37	9.92	9.6	9.2	-0.443089	-0.4856	0.0425134		10.275	8.8	9.3	8.2	-1.47753	-1.06952	-0.408009
YLR163C	MAS1	7.59	7.05	7.5	7.7	-0.541773	0.17596	-0.717735		7.645	7.25	8.1	8.1	-0.39879	0.03315	-0.431941
YLR361C	DCR2	6.53	6.35	6.5	6.4	-0.171814	-0.10773	-0.0640798		6.536	6.46	6.7	6.8	-0.07569	0.07609	-0.151784
YDR369C	XRS2	5.05	5.82	6.3	6.5	0.761146	0.21132	0.549822		4.897	5.9	5.8	6.5	1.00472	0.70349	0.301231
YOR205C	GEP3	4.85	5.7	6.8	6.9	0.846728	0.15781	0.688913		4.874	5.46	6.5	7	0.58762	0.50076	0.086862
YMR041C	ARA2	4.99	5.72	5.7	5.7	0.738129	0.04991	0.688218		4.923	5.75	5.9	5.8	0.82596	-0.10489	0.930854
YBR028C		6.89	6.6	7.3	7	-0.298743	-0.33781	0.0390673		6.463	6.3	7.1	6.6	-0.16591	-0.44033	0.27442
YDL107W	MSS2	4.74	4.95	6	5.3	0.208894	-0.65106	0.85995		5.14	5.68	5.4	5.1	0.54305	-0.37387	0.916919
YDL006W	PTC1	5.93	5.69	6.4	6.2	-0.23623	-0.24247	0.006239		6.402	6	6.5	6	-0.40468	-0.52539	0.120715
YDL240W	LRG1	6.57	6.68	7.1	7	0.108558	-0.12861	0.237165		6.533	5.88	6.2	6.1	-0.65486	-0.06829	-0.58657
YBR129C	OPY1	5.71	5.68	6.5	6.5	-0.023667	-0.02332	-0.0003477		5.81	5.48	6	6.4	-0.32583	0.35891	-0.684742
YGR285C	ZUO1	11.48	11.3	10.2	9.8	-0.17196	-0.36998	0.198023		11.339	10.84	10.5	9.9	-0.50364	-0.55864	0.054991
YNL048W	ALG11	7.93	6.97	7.5	7.1	-0.964979	-0.32773	-0.637247		7.464	6.56	6.9	7	-0.90785	0.06541	-0.973264
YMR207C	HFA1	6.01	6.56	7	7.4	0.548646	0.33971	0.208937		5.345	6.32	6.4	7.3	0.97523	0.92289	0.052343
YPL042C	SSN3	5.49	6.18	6.6	6.7	0.689301	0.11326	0.576038		5.812	6.49	6.7	6.5	0.68126	-0.21061	0.891878
YDL191W	RPL35A	12.13	11.98	11.1	10.6	-0.158057	-0.50075	0.342689		11.999	12.02	10.9	10.3	0.01994	-0.61425	0.634192
YPR149W	NCE102	11.04	11.47	9.9	9.6	0.433368	-0.30744	0.740805		11.459	12.19	9.5	9.1	0.7327	-0.45797	1.19067
YNL268W	LYP1	9.63	9.52	8.8	9.2	-0.111094	0.324	-0.435098		9.299	9.5	8.8	9.1	0.20529	0.33801	-0.132715
YDR084C	TVP23	7.49	7.3	6	6	-0.189586	0.00839	-0.197979		7.274	7.4	6.1	5.5	0.12711	-0.55145	0.678564
YPR048W	TAH18	6.66	7.04	7.1	7.3	0.387876	0.20728	0.180592		6.793	6.74	7.1	7.3	-0.04935	0.13656	-0.185908
YDL161W	ENT1	7.59	7.63	7.2	7.3	0.04094	0.08592	-0.0449791		7.436	7.57	6.9	7.3	0.13677	0.37198	-0.23521
YDR408C	ADE8	7.16	7.12	7.6	7.6	-0.032645	-0.02133	-0.0113163		6.861	7.65	7.8	8.3	0.79407	0.49786	0.296208
YDL060W	TSR1	8.05	8.03	8.2	8.2	-0.020142	-0.03927	0.0191326		7.956	8.02	8.2	8.3	0.06401	0.09925	-0.035235
YFL062W	COS4	8.68	9.25	8.5	8.6	0.573395	0.12864	0.444758		8.872	9.02	8.4	8.6	0.14518	0.22686	-0.081686
YEL007W		8.14	8.29	8.5	7.6	0.143802	-0.87514	1.01894		8.063	7.8	8.2	6.9	-0.26635	-1.27859	1.01224
YGL207W	SPT16	10.2	9.63	9.1	9	-0.569789	-0.09441	-0.475382		9.814	9.24	8.8	9	-0.57196	0.1874	-0.759359
YMR162C	DNF3	7.2	7.44	7.7	7.9	0.244918	0.16633	0.0785841		7.061	7.15	7.5	7.9	0.08666	0.37404	-0.287376
YOR124C	UBP2	8.77	8.21	8.2	8	-0.554767	-0.21132	-0.343445		8.552	8.24	7.5	8	-0.31374	0.51097	-0.824706
YLR105C	SEN2	4.35	4.79	6.7	6.1	0.449332	-0.60392	1.05325		5.382	5.86	6.9	6.3	0.47335	-0.5921	1.06545
YOL049W	GSH2	8.57	8.3	8.5	8.1	-0.276183	-0.3991	0.122913		8.078	7.31	8.1	7.9	-0.7692	-0.21678	-0.552416
YLR242C	ARV1	4.91	5.35	6.7	6.7	0.437934	0.00531	0.432626		5.46	4.98	7	6.6	-0.47926	-0.4	-0.07926
YMR261C	TPS3	9.15	9.04	8.6	8.5	-0.109125	-0.15251	0.043382		9.272	9.13	8.1	7.9	-0.14437	-0.1963	0.051926
YDR387C		4.68	4.98	7.2	7.1	0.304561	-0.15373	0.458293		5.427	5.34	7.4	7.3	-0.09093	-0.06567	-0.025252
YPR185W	ATG13	5.7	6.31	7.1	6.9	0.606358	-0.16128	0.767643		6.48	5.93	6.7	7	-0.54882	0.30795	-0.856763
YPR084W		5.08	5.3	6	6.1	0.220301	0.12448	0.0958201		5.338	5.79	5.9	5.9	0.45537	-0.01138	0.466747
YHL028W	WSC4	6.87	6.66	7.7	6.9	-0.210742	-0.79474	0.583997		5.879	4.42	6.6	4.4	-1.45762	-2.21001	0.752395
YOR362C	PRE10	8.87	8.54	8.8	8.4	-0.330823	-0.36672	0.0358947		8.836	8.71	8.8	8.4	-0.12345	-0.41892	0.295475
YBR280C	SAF1	6.27	6.22	6.1	6.2	-0.050729	0.18393	-0.234662		6.29	7.21	6.3	6.5	0.91605	0.13661	0.779437
YLR040C		5.91	6.06	5	4.9	0.143582	-0.08629	0.229871		6.94	6.45	5.2	5.6	-0.49203	0.39346	-0.885492
YEL043W		6.98	7.37	7.3	7.5	0.393678	0.19302	0.200657		6.875	7.04	7.4	7.6	0.16703	0.20281	-0.035772
YGR168C		3.82	4.6	6.3	6.6	0.771877	0.27422	0.497661		3.93	5.31	6.4	6.8	1.37859	0.41918	0.959405
YBR208C	DUR1,2	7.63	6.88	7.2	7.1	-0.749094	-0.06095	-0.68814		5.497	5.53	6.6	6.3	0.03752	-0.3073	0.344824
YKR065C	PAM17	7.83	7.73	6.9	6.2	-0.102342	-0.7089	0.606554		8.28	7.77	6.9	6.2	-0.50755	-0.66413	0.156576
YGL243W	TAD1	4.14	5.17	6.8	6.7	1.03107	-0.07703	1.1081		4.616	5.46	6.8	7	0.84169	0.15943	0.682263
YHR044C	DOG1	6.03	5.66	6.1	5.6	-0.369158	-0.49586	0.126702		6.078	5.34	6.6	6	-0.739	-0.63644	-0.102565
YCL001W	RER1	8.27	7.74	7.4	6.7	-0.527012	-0.67444	0.14743		7.946	7.37	7.5	6.7	-0.578	-0.76713	0.189128
YFL026W	STE2	10.54	10.5	10.6	10.5	-0.042653	-0.06845	0.025801		9.837	10.33	10.4	10.8	0.49123	0.36586	0.125366
YPL161C	BEM4	6.56	6.31	7	6.9	-0.252242	-0.11269	-0.139557		6.783	6.54	6.4	7.2	-0.23982	0.73956	-0.979374
YMR126C	DLT1	3.66	3.93	6.3	6.1	0.270208	-0.15467	0.424879		4.68	4.1	6.4	5.8	-0.58182	-0.55738	-0.024442
YKL009W	MRT4	8.3	8.25	8.1	8.1	-0.042231	-0.01464	-0.0275888		7.89	7.64	7.9	8.3	-0.25304	0.47916	-0.7322
YKL108W	SLD2	5.27	5.53	6.2	6.4	0.255956	0.13457	0.121387		5.189	6.05	6.1	6	0.85859	-0.06227	0.920855
YGL032C	AGA2	8.11	6.84	6.6	5.3	-1.26978	-1.27943	0.009655		7.755	7.71	6.7	6.7	-0.04498	0.03394	-0.078924
YPL233W	NSL1	5.31	5.38	5.7	5.7	0.066974	-0.0653	0.132277		5.553	6.22	6.2	5.8	0.66825	-0.37659	1.04484
YAL034C	FUN19	3.18	5.71	5.9	5.8	2.53116	-0.11683	2.64799		5.522	7.06	6.1	6.4	1.53659	0.25614	1.28045
YKL159C	RCN1	4.96	5.19	5.2	5	0.225896	-0.20005	0.42595		4.605	5.81	5.3	5.9	1.20659	0.54804	0.658545
YBR259W		4.64	4.83	6.4	6.6	0.192903	0.15318	0.0397207		4.801	4.86	5.9	6.4	0.05439	0.45224	-0.39785
YHR172W	SPC97	6.19	6.36	6.2	6.3	0.165981	0.08496	0.0810184		6.52	5.04	6	5.2	-1.47697	-0.79892	-0.678052
YLR257W		8.77	8.47	9.4	9.1	-0.300944	-0.23153	-0.0694162		8.944	9.05	9.6	9.7	0.1053	0.03795	0.067356
YOR210W	RPB10	7.29	7.74	6.5	6.2	0.448222	-0.32798	0.776198		7.691	7.83	6.7	6.6	0.13605	-0.1274	0.263448
YJL158C	CIS3	11.89	11.41	9.9	9.6	-0.478414	-0.37455	-0.103867		12.308	11.07	10.4	9.4	-1.24326	-0.97732	-0.265936
YMR054W	STV1	7.88	8.01	8	7.9	0.130399	-0.07403	0.204424		7.236	7.19	7.5	7.5	-0.04383	0.01671	-0.060536
YLR011W	LOT6	4.65	5.12	5.6	5.6	0.471239	0.01201	0.459229		5.101	5.24	6.1	6.3	0.14397	0.25198	-0.108013
YBR097W	VPS15	6.94	6.94	7.1	7.2	-0.000845	0.09398	-0.0948239		6.781	6.62	6.9	7.2	-0.15702	0.24098	-0.397991
YMR177W	MMT1	5.78	6.61	6.5	6.4	0.823478	-0.06759	0.89107		5.965	6.26	6.5	6.5	0.29485	-0.02888	0.323727
YML038C	YMD8	6.69	7.24	7.6	7.8	0.552671	0.151	0.401675		6.047	6.73	7.2	7.4	0.6803	0.16266	0.517636
YGR218W	CRM1	10.3	9.82	9	9	-0.477035	0.02596	-0.502995		10.288	9.61	8.7	8.8	-0.67604	0.09116	-0.767195
YFL033C	RIM15	6.9	7.55	7.3	7.3	0.649484	0.01438	0.635105		6.622	7	7	6.8	0.37676	-0.15901	0.535765
YER090W	TRP2	9.61	9.24	8.6	8.2	-0.370409	-0.37702	0.0066126		9.489	9.09	8.8	8.5	-0.40287	-0.30368	-0.099186
YGR092W	DBF2	8.03	8.31	7.8	8.3	0.2855	0.47119	-0.185688		7.873	7.95	8.2	8.3	0.07774	0.11968	-0.041941
YNL118C	DCP2	8.49	8.6	8.7	8.9	0.109538	0.13734	-0.0278062		8.48	8.78	7.5	8.4	0.29856	0.88631	-0.587749
YLR451W	LEU3	6.32	6.6	7.2	7.7	0.279935	0.4916	-0.211669		6.331	6.87	7.1	7.4	0.53949	0.29257	0.246925
YOR377W	ATF1	4.95	3.16	6.8	7	-1.79393	0.15914	-1.95307		4.886	3.37	6.7	6.8	-1.51636	0.16738	-1.68374
YBR295W	PCA1	4.37	5.7	6.6	7.6	1.3327	1.01695	0.315753		2.87	6.5	7.2	8.4	3.62551	1.17781	2.4477
YLL039C	UBI4	9.51	9.68	9.6	9.8	0.170008	0.2492	-0.0791916		11.231	10.92	10.6	10.4	-0.31106	-0.20768	-0.103386
YOL119C	MCH4	6.86	8.4	7.8	8.7	1.54246	0.96867	0.573785		6.878	8.61	8.1	9.3	1.73627	1.22071	0.515558
YKR016W	FCJ1	7.65	8.01	7.6	7.6	0.359225	0.04731	0.311911		7.594	7.82	6.9	7.5	0.23025	0.58888	-0.35863
YMR010W		7.56	7.28	7.4	7.7	-0.28375	0.24879	-0.532538		7.335	7.03	7.6	7.7	-0.30558	0.16612	-0.471699
YLR330W	CHS5	8.9	8.37	8.7	8.7	-0.526012	-0.0384	-0.487615		8.453	8.28	8.5	8.5	-0.17678	0.03314	-0.209922
YPR091C		8.31	7.96	7.5	7.2	-0.350741	-0.24903	-0.101715		8.17	8.07	7.4	7.4	-0.10064	0.02157	-0.122214
YPR190C	RPC82	7.33	7.64	7.2	7.8	0.308177	0.66678	-0.358605		7.344	7.17	7.2	7.2	-0.17053	0.02055	-0.191079
YPL211W	NIP7	7.82	8.23	7.5	7.5	0.405719	0.02138	0.384337		7.649	7.54	7.6	7.3	-0.10823	-0.27437	0.166146
YJR035W	RAD26	5.62	6.07	6.2	6.7	0.450335	0.43569	0.01465		5.422	6.07	5.8	6.7	0.64863	0.89545	-0.246825
YKR070W		7.24	6.87	7	6.6	-0.368531	-0.34953	-0.019003		7.324	6.79	7.4	7	-0.53675	-0.38058	-0.156176
YHR073W	OSH3	7.71	7.64	8.1	8.3	-0.070906	0.11594	-0.186841		7.294	7.43	8.2	8.4	0.13883	0.18686	-0.048027
YOL018C	TLG2	6.67	6.23	7	6.7	-0.442037	-0.27699	-0.165044		6.74	6.47	6.7	6.9	-0.27386	0.20831	-0.482168
YHR150W	PEX28	4.07	4.84	6.9	7.2	0.768844	0.28556	0.483281		5.2	5.73	7	7.2	0.53312	0.2582	0.274923
YDR025W	RPS11A	12.11	12.03	10.8	10.4	-0.080749	-0.418	0.337246		11.794	11.57	10.7	10.2	-0.22766	-0.50468	0.277013
YBL051C	PIN4	8.55	7.96	6.9	7.2	-0.588967	0.26016	-0.849129		8.21	7.88	6.7	7.5	-0.334	0.78551	-1.11951
YDR392W	SPT3	5.71	5.74	6.4	6.5	0.026163	0.09078	-0.0646212		5.614	5.75	6.5	6.5	0.13396	0.00926	0.1247
YLR077W	FMP25	6.29	6.25	7	7	-0.037081	0.03876	-0.0758413		6.058	5.68	7	6.8	-0.37313	-0.25207	-0.121056
YOR276W	CAF20	9.26	9.06	7.4	7	-0.200882	-0.48066	0.279776		9.124	8.96	7.1	6.4	-0.15939	-0.72632	0.566938
YJR152W	DAL5	-0.81	1.6	6.1	6.7	2.41162	0.58251	1.82911		0.377	2.46	6.5	6.7	2.08134	0.25968	1.82166
YMR155W		6.14	6.03	6.7	6.6	-0.11857	-0.06624	-0.0523292		6.109	5.6	7	6.6	-0.50655	-0.34529	-0.161262
YML092C	PRE8	8.34	8.4	8	7.9	0.067297	-0.09973	0.167029		8.474	8.34	8.1	8	-0.13156	-0.1485	0.016938
YGL054C	ERV14	9.01	9.07	8.7	8.2	0.059862	-0.49858	0.558439		9.232	9.22	8.6	8.2	-0.01125	-0.41828	0.407031
YCL050C	APA1	9.78	8.82	8.2	7.4	-0.952291	-0.80296	-0.149329		9.947	8.93	8.2	7.3	-1.01194	-0.90849	-0.103449
YOR355W	GDS1	7.74	8.35	8.2	8.8	0.612738	0.58955	0.0231876		7.73	8.37	7.8	8.7	0.6446	0.86215	-0.217553
YML026C	RPS18B	11.79	11.85	10.8	10.4	0.062638	-0.42147	0.48411		11.373	11.51	10.3	9.6	0.14012	-0.68402	0.824138
YJR116W		5.73	6.2	5.1	5.3	0.472718	0.13003	0.342692		6.614	6.32	5.6	5.1	-0.29003	-0.40982	0.119794
YMR199W	CLN1	7.81	6.77	7.8	6.3	-1.04378	-1.51051	0.466732		7.437	5.95	7.2	5.4	-1.49141	-1.77243	0.281015
YHR037W	PUT2	8.58	8.29	7.1	7.3	-0.292927	0.27311	-0.566036		8.283	8.45	6.9	7.2	0.17108	0.36165	-0.190561
YIL096C		5.47	5.95	5.4	5.8	0.482806	0.36884	0.11397		5.139	5.03	6	5.9	-0.11091	-0.07711	-0.033794
YHR114W	BZZ1	7.49	7.08	7	7.2	-0.413746	0.21956	-0.633304		7.514	7.23	7.6	7.7	-0.28183	0.11859	-0.40042
YDL174C	DLD1	7.52	7.62	7.3	7.5	0.102496	0.24898	-0.146486		8.267	7.69	7.9	8.1	-0.57397	0.16515	-0.739115
YLR033W	RSC58	7.24	6.81	7.6	7.3	-0.430802	-0.23468	-0.196123		7.061	7.17	6.7	7.4	0.10383	0.70338	-0.599545
YDR118W	APC4	5.81	5.72	6.4	6.7	-0.083684	0.34688	-0.430565		5.684	6.06	6.3	6.6	0.37168	0.29555	0.076135
YPL255W	BBP1	4.59	5.12	6.2	5.3	0.526326	-0.89639	1.42271		5.21	3.98	5.2	4.5	-1.23264	-0.6917	-0.540938
YNR075W	COS10	5.01	4.93	5	5.1	-0.08336	0.06755	-0.150906		4.655	4.11	4.8	4.6	-0.5435	-0.25075	-0.292747
YOR030W	DFG16	5.08	5.73	6.3	6.9	0.648398	0.54046	0.107942		5.007	5.19	5.7	6.1	0.18287	0.38227	-0.199394
YOR232W	MGE1	9.26	8.47	7.9	7.3	-0.788411	-0.6461	-0.142316		8.596	7.95	7.7	7.4	-0.64799	-0.28625	-0.361743
YLR356W	ATG33	6.92	7.51	5.9	6.2	0.584056	0.30247	0.281584		7.539	8.12	6.3	6.2	0.57859	-0.13889	0.717479
YGR038W	ORM1	7.29	6.98	7	6.6	-0.303244	-0.39543	0.0921843		6.959	6.42	6.9	6.1	-0.53851	-0.82517	0.286655
YOR113W	AZF1	6.4	6.8	6.2	6.5	0.399212	0.25242	0.146791		6.521	7.25	6.1	6.5	0.72912	0.4217	0.307421
YGL122C	NAB2	9.45	8.9	7.8	8.2	-0.551057	0.33876	-0.889814		9.259	8.57	8	8.1	-0.69279	0.07223	-0.765024
YMR203W	TOM40	10.04	9.61	8.2	7.9	-0.434166	-0.3055	-0.128662		9.828	9.2	8	7.5	-0.63036	-0.44809	-0.182274
YGR281W	YOR1	7.89	8.41	7.8	8.3	0.515277	0.47974	0.0355395		8.044	7.94	7.3	7.8	-0.10014	0.49507	-0.595205
YGL023C	PIB2	6.78	6.49	6.9	7.3	-0.287317	0.38938	-0.676696		6.562	5.99	6.8	7	-0.57058	0.23212	-0.802706
YPL147W	PXA1	4.27	4.7	5.7	5.5	0.435562	-0.25575	0.69131		4.508	5.27	5.3	5.5	0.76266	0.28659	0.47608
YGL221C	NIF3	8.35	8.29	7.9	7.7	-0.062909	-0.29476	0.231855		8.876	8.74	8.6	8.1	-0.13455	-0.51269	0.378138
YHR163W	SOL3	8.16	7.73	8	7.8	-0.425093	-0.28593	-0.139164		8.306	7.45	8.4	8	-0.85672	-0.45268	-0.404041
YMR079W	SEC14	9.94	9.59	8.1	7.9	-0.344437	-0.22042	-0.124017		9.648	8.99	8.4	7.9	-0.66185	-0.58036	-0.081488
YOR289W		4.88	6.45	4.5	5.7	1.57068	1.15363	0.417048		5.327	6.96	4.8	5.9	1.63763	1.11265	0.524978
YAL025C	MAK16	7.77	7.43	7	7.4	-0.339493	0.43948	-0.778974		7.4	7.56	7.1	7.4	0.15982	0.27271	-0.112888
YDL103C	QRI1	8.43	8	7.4	7.1	-0.432834	-0.30946	-0.12337		8.472	7.86	7.4	6.8	-0.6112	-0.64036	0.029156
YDL002C	NHP10	6.21	6.08	6.4	6.2	-0.13014	-0.16514	0.0349971		5.696	6.41	6.3	6.4	0.71722	0.08378	0.633433
YFL044C	OTU1	6.71	6.56	6.3	6.3	-0.158734	0.03159	-0.190322		6.832	7.24	6.4	6.3	0.41253	-0.09244	0.504967
YLR167W	RPS31	13.1	13.11	12.9	12.4	0.006965	-0.51284	0.519809		12.896	12.83	12.9	12.3	-0.06661	-0.58003	0.513419
YJL048C	UBX6	6.51	6.77	7.1	6.8	0.256123	-0.33256	0.588683		6.611	7.71	7.2	7.3	1.09991	0.13567	0.964237
YMR144W		6.34	5.89	6.3	6.3	-0.453412	0.01915	-0.472566		6.445	5.74	6.4	6	-0.70027	-0.37394	-0.326324
YLR264W	RPS28B	9.72	9.8	9.1	8.8	0.078375	-0.36265	0.441025		9.536	9.91	8.5	8	0.37303	-0.49816	0.871189
YLL050C	COF1	10.75	10.76	9.9	9.4	0.007144	-0.52663	0.533777		10.635	10.59	9.5	8.8	-0.04782	-0.63178	0.583964
YML128C	MSC1	8.26	8.29	8.1	7.6	0.027517	-0.5761	0.603617		9.251	9.57	8.1	7.5	0.32332	-0.59313	0.916451
YLR462W		5.48	6.66	6.7	7.4	1.18273	0.72441	0.458322		4.864	6.13	6.6	6.8	1.26923	0.22458	1.04465
YLR066W	SPC3	7.81	7.8	7.1	6.8	-0.012242	-0.3226	0.310353		7.565	7.45	7.1	6.8	-0.11515	-0.24762	0.132468
YJL185C		4.13	4.97	4.7	5.2	0.834279	0.55518	0.279096		4.934	4.92	5.8	5.8	-0.01413	-0.05891	0.044785
YJL084C	ALY2	7.27	7.63	7.1	7.4	0.351811	0.34619	0.0056177		7.269	7.49	7.2	7.6	0.2226	0.36712	-0.14452
YER081W	SER3	7.37	7.84	7.8	7.9	0.470725	0.08791	0.38282		6.325	5.82	7.8	8	-0.50307	0.2118	-0.714873
YDL200C	MGT1	5.88	5.65	5.3	5.2	-0.230805	-0.07262	-0.158184		5.722	6.39	5.6	5.8	0.66439	0.21633	0.448062
YNL008C	ASI3	7.11	7.4	7.7	7.9	0.293434	0.17413	0.119302		6.958	7.43	7.6	7.9	0.47275	0.25077	0.221979
YJR060W	CBF1	7.13	7.13	7	6.8	-0.00432	-0.20903	0.204707		7.523	7.57	7.3	7.2	0.05103	-0.10173	0.152761
YHR127W		6.56	6.13	6.2	5.6	-0.430016	-0.63772	0.207709		6.542	5.93	6.2	5.3	-0.61641	-0.84115	0.224738
YBL105C	PKC1	7.48	7.97	7.8	8.2	0.490501	0.41129	0.0792153		7.382	7.72	7.2	7.7	0.34178	0.44812	-0.106344
YIR005W	IST3	4.6	4.99	5.2	5	0.389386	-0.22584	0.615226		5.267	5.83	5.6	6.1	0.55913	0.48342	0.075715
YHR026W	VMA16	9.35	9.08	9.3	8.8	-0.274632	-0.55113	0.276497		9.039	8.62	9.4	8.6	-0.41693	-0.73093	0.313997
YKR007W	MEH1	5.72	6.13	5.1	5.6	0.406119	0.42971	-0.0235883		5.923	6.19	5.3	5.9	0.2647	0.59414	-0.329445
YNL080C	EOS1	5.65	5.8	7	6.9	0.147679	-0.11662	0.264303		6.074	5.5	7	6.6	-0.57719	-0.42415	-0.153037
YMR100W	MUB1	6.31	6.41	6.6	6.4	0.100582	-0.20782	0.308405		6.238	6.68	5.6	5.8	0.44467	0.14886	0.295813
YER009W	NTF2	10.28	10.33	9.2	8.8	0.054249	-0.3977	0.451949		10.102	9.97	8.8	7.9	-0.12926	-0.90412	0.774864
YLR220W	CCC1	7.4	7.6	7.7	7.7	0.205368	0.07173	0.133637		7.578	8.25	8.1	8.1	0.67457	0.02316	0.651408
YOR003W	YSP3	4.16	4.55	5.5	5.9	0.391076	0.40028	-0.0092022		5.469	6.45	6.3	6.3	0.97929	0.03005	0.949246
YDR034W-B		2.01	4.81	2.5	3.9	2.79923	1.38707	1.41215		4.133	6.76	4.4	6.4	2.6319	2.07668	0.55522
YPR181C	SEC23	10.56	10.32	8.8	8.9	-0.241447	0.03363	-0.275076		10.434	9.43	8.8	8.7	-1.00689	-0.10101	-0.905877
YNR046W	TRM112	7.94	8.19	7.1	7.3	0.243694	0.27017	-0.0264801		8.165	7.99	7.8	7.9	-0.17486	0.09915	-0.274006
YPL266W	DIM1	7.84	7.9	7.6	7.3	0.056189	-0.2319	0.288087		7.429	7.44	7.7	7.8	0.01144	0.05079	-0.03935
YGL001C	ERG26	8.19	7.6	7.8	7.1	-0.59803	-0.67955	0.0815217		8.429	7.68	8	7.2	-0.74621	-0.7904	0.044191
YCR069W	CPR4	7.88	7.83	7.2	7.2	-0.054789	0.04156	-0.0963518		7.948	7.03	7.7	7.3	-0.91622	-0.41702	-0.499203
YOL009C	MDM12	4.29	4.89	5.7	5.6	0.603995	-0.09332	0.69732		5.072	4.55	6	5.8	-0.51826	-0.22233	-0.295936
YOL108C	INO4	5.09	5.11	5.7	5.2	0.022665	-0.52258	0.54524		5.125	5.8	5.5	5.2	0.67069	-0.34818	1.01887
YML073C	RPL6A	11.93	11.92	10.9	10.5	-0.005856	-0.43615	0.430289		11.743	11.52	10.7	10.2	-0.2212	-0.53836	0.317155
YKR061W	KTR2	4.18	4.92	6.7	7.2	0.739038	0.49153	0.247513		3.45	5.82	7.2	7.9	2.36987	0.71491	1.65495
YHR040W	BCD1	5.59	5.88	6.3	6.7	0.295766	0.32663	-0.0308623		5.524	6.2	6.6	7	0.67908	0.35631	0.322767
YEL047C		9.22	9.09	8.2	7.9	-0.134405	-0.29332	0.158917		9.703	9.25	9	8.2	-0.45284	-0.79332	0.340483
YAL043C	PTA1	7.62	8.13	7.8	8.1	0.514009	0.30668	0.207329		7.577	7.81	7.8	8.3	0.2368	0.41452	-0.177715
YHR206W	SKN7	7.28	7.44	7.1	7.3	0.15763	0.20494	-0.0473129		7.089	7.3	7	7.1	0.21102	0.10501	0.106018
YDL121C		7.11	7.5	6.9	6.4	0.38706	-0.46257	0.849632		7.378	7.4	6.5	6.4	0.02321	-0.07371	0.096919
YDL222C	FMP45	4.1	5.03	5.3	4.5	0.933368	-0.82487	1.75824		5.441	8.53	6.3	7.3	3.09132	0.97196	2.11936
YDL020C	RPN4	7.22	7.44	7.9	8.5	0.222805	0.53391	-0.311104		8.103	8.19	8	8.5	0.0913	0.49577	-0.404474
YFL022C	FRS2	10.56	10.2	8.9	8.5	-0.359639	-0.41437	0.0547261		10.256	9.51	8.8	8.2	-0.74288	-0.5174	-0.225479
YDR448W	ADA2	7.03	6.29	7.6	7.1	-0.739226	-0.52355	-0.215678		6.836	6.55	7.7	7.1	-0.28981	-0.59526	0.305454
YBR284W		2.96	3.04	4.9	4.9	0.080128	0.01756	0.0625719		3.603	2.91	5.3	4.2	-0.68969	-1.11126	0.421562
YLR145W	RMP1	5.39	4.61	5.6	5.5	-0.78226	-0.03822	-0.744036		4.905	4.99	5.2	5.1	0.08368	-0.10986	0.193543
YJR042W	NUP85	7.75	7.92	8.2	8.2	0.16738	0.02098	0.146402		7.575	7.67	8	8.3	0.09088	0.21465	-0.123763
YOR065W	CYT1	8.07	8.85	7.5	7.9	0.777453	0.33412	0.44333		8.218	8.55	7.1	7.4	0.32861	0.25484	0.073773
YNL329C	PEX6	6.4	6.89	7.8	7.9	0.489128	0.08971	0.399415		5.813	6.64	8.1	7.9	0.83155	-0.19349	1.02504
YHR218W		7.9	9.15	9.7	10.2	1.24815	0.44583	0.802328		6.76	8.6	9.8	10	1.83912	0.1887	1.65042
YPL222W	FMP40	6.19	6.11	6.5	6.9	-0.081733	0.36328	-0.445015		6.086	6.33	7	7.7	0.24875	0.63425	-0.385501
YGL144C	ROG1	4.71	5.57	6.2	6.7	0.852317	0.52039	0.331925		5.279	5.64	6.9	7	0.35943	0.05099	0.308444
YGL203C	KEX1	8.45	8.29	7.7	7.6	-0.162675	-0.10183	-0.0608404		8.531	8.06	7.4	7.7	-0.47489	0.35852	-0.833403
YDR080W	VPS41	6.87	6.54	7.1	7.3	-0.334616	0.21971	-0.554327		6.993	7.11	6.7	7.5	0.11529	0.84923	-0.733935
YKL049C	CSE4	6.12	6.03	5.9	5.9	-0.088373	-0.00231	-0.0860669		6.553	6.52	6.1	5.5	-0.03106	-0.63916	0.608107
YJR107W		-0.81	1.84	5.1	5.1	2.65056	-0.05042	2.70098		0.376	1.04	5.2	4.4	0.66885	-0.78067	1.44952
YLR088W	GAA1	8.09	8	7.8	7.5	-0.095307	-0.30022	0.204912		8.162	7.42	7.5	7	-0.73772	-0.43166	-0.306061
YLR404W	FLD1	5.07	5.39	5.9	6.2	0.311827	0.32978	-0.0179562		5.67	5.93	6.1	6	0.26251	-0.04369	0.3062
YKL148C	SDH1	7.99	8.55	6.7	7.4	0.561131	0.63206	-0.0709293		7.939	8.05	6.4	6.5	0.10999	0.05913	0.050861
YJR006W	POL31	6.35	6.58	7.1	7.2	0.230294	0.09413	0.136169		6.504	6.48	6.8	7.1	-0.02285	0.23999	-0.262836
YAL007C	ERP2	8.36	8.48	7.6	7.2	0.12302	-0.42978	0.552805		8.676	7.59	7.5	6.3	-1.08684	-1.1266	0.039757
YHR105W	YPT35	3.88	4.15	5.1	5.2	0.269721	0.11109	0.158634		4.53	5.51	5.1	5.4	0.97881	0.33183	0.646983
YKR025W	RPC37	7.5	7.04	7.3	7.2	-0.461708	-0.0855	-0.376203		6.973	6.73	7.7	8	-0.24185	0.26926	-0.511111
YFL066C		6.97	8.04	9.5	9.8	1.06701	0.31884	0.748166		5.999	7.43	9.6	9.7	1.42728	0.16166	1.26563
YIL087C	AIM19	5.41	5.46	5.4	5.5	0.054232	0.02185	0.0323786		4.683	5.89	5.5	5.6	1.20916	0.09153	1.11763
YDR484W	VPS52	6.47	6.4	6.6	6.7	-0.071272	0.11911	-0.190381		6.406	6.18	6	6.4	-0.22647	0.39578	-0.622249
YOR120W	GCY1	6.07	6.26	6.3	6.3	0.187988	0.00518	0.182811		7.488	8.82	7	7.4	1.33428	0.41508	0.919194
YBR187W	GDT1	8.6	8.35	8.7	7.9	-0.250192	-0.71232	0.462124		8.271	7.26	8.5	7.6	-1.00685	-0.89937	-0.10748
YLR246W	ERF2	4.18	5.04	6.2	6.3	0.860898	0.03108	0.829821		3.663	4.84	6.1	5.9	1.17875	-0.22677	1.40552
YOR223W		6.06	5.76	6	6.2	-0.30237	0.20238	-0.504755		5.802	6.22	6.7	6.6	0.41501	-0.08329	0.498297
YEL038W	UTR4	7.4	7.11	6.4	6.4	-0.288023	0.00939	-0.297416		7.38	7.07	6.4	6.3	-0.30715	-0.05155	-0.255602
YML113W	DAT1	5.93	6.31	6.1	6.7	0.381503	0.52651	-0.145009		6.195	5.91	6.6	6.5	-0.28222	-0.12545	-0.156771
YPR055W	SEC8	7.46	7.43	7.6	7.6	-0.026094	-0.02704	0.0009409		7.497	7.26	6.3	7.5	-0.23982	1.26851	-1.50834
YNL275W	BOR1	5.43	5.57	6	6.2	0.143627	0.19046	-0.0468371		5.139	4.67	5.8	5.8	-0.46418	0.02637	-0.490547
YER054C	GIP2	3.86	4.24	4.9	5	0.379222	0.11122	0.267999		4.853	5.1	5.3	4.8	0.25132	-0.47489	0.726214
YNL077W	APJ1	5.41	5.61	4.8	5.7	0.206749	0.82977	-0.623018		6.683	6.92	5.7	6.6	0.23209	0.96111	-0.729026
YJL073W	JEM1	6.59	6.36	5.9	6	-0.222872	0.11918	-0.342056		7.007	6.22	5.6	5.6	-0.7903	-0.00803	-0.782272
YML030W	AIM31	6	6.43	6.3	6.3	0.432958	0.05648	0.376482		6.202	6.09	5.8	5.9	-0.11359	0.07502	-0.188604
YGR210C		7.79	7.44	8.1	8.1	-0.354619	0.01192	-0.366542		7.621	6.69	8.6	8.3	-0.93218	-0.30807	-0.624115
YDR257C	RKM4	7.18	6.32	7.2	7.3	-0.862433	0.18422	-1.04666		6.393	6.97	7.1	7.3	0.57833	0.23623	0.342101
YOR290C	SNF2	8.47	8.48	8.5	8.5	0.014758	-0.02193	0.0366876		8.344	8.49	8.2	8.4	0.14176	0.22466	-0.082899
YDR415C		7.08	6.71	6.5	6.6	-0.373002	0.02986	-0.402863		7.081	7.22	6.6	6.5	0.13524	-0.06185	0.197086
YBR017C	KAP104	9.09	9	8.6	8.7	-0.08918	0.09504	-0.184218		9.28	9.02	8.9	8.9	-0.26096	0.0001	-0.261067
YOL032W	OPI10	6.13	5.93	6.1	6.2	-0.19597	0.05603	-0.251997		7.13	7.35	6.6	6.8	0.22063	0.12323	0.097401
YDL192W	ARF1	11.06	11.06	10.1	9.5	-0.002904	-0.58668	0.583776		10.836	10.35	9.8	8.8	-0.48842	-0.95624	0.467818
YGL238W	CSE1	9.04	8.86	9	9	-0.180071	0.02301	-0.203083		8.99	8.53	8.6	8.9	-0.46444	0.34952	-0.813961
YAR014C	BUD14	7.41	7.26	8.1	8.5	-0.145157	0.44189	-0.587045		7.061	6.47	7.8	8.5	-0.58951	0.75411	-1.34362
YDR132C		4.63	5.09	5.6	6.2	0.459492	0.58475	-0.125263		4.724	4.78	6	6.3	0.05532	0.3106	-0.255285
YGL119W	COQ8	6.9	6.63	6.7	6.7	-0.267402	0.0015	-0.268901		6.63	6.59	6.9	6.7	-0.04463	-0.16739	0.122764
YIL153W	RRD1	6.57	6.65	6.6	6.6	0.080753	0.0043	0.0764496		6.452	6.24	6.7	6.6	-0.21	-0.08232	-0.127679
YER010C		5.81	6.76	6.7	6.6	0.950936	-0.09096	1.0419		6.633	6.13	7	6.6	-0.50704	-0.42129	-0.085749
YGR175C	ERG1	10.59	10.75	9.3	9.4	0.164897	0.13206	0.032832		10.837	10.87	9.6	9.5	0.03486	-0.0923	0.127164
YLR293C	GSP1	11.45	11.27	9.7	9.4	-0.181397	-0.34506	0.163664		11.241	11.03	9.8	9.4	-0.20933	-0.39298	0.183644
YGL191W	COX13	8.46	8.97	7.4	7.5	0.507407	0.13195	0.375455		8.3	9.02	7.5	7.3	0.72108	-0.21031	0.931391
YBR170C	NPL4	7.42	7.52	7.8	7.7	0.103914	-0.00768	0.111591		7.891	7.87	7.8	8	-0.02453	0.22754	-0.252067
YDR451C	YHP1	7.19	6.19	7.4	6.8	-1.00496	-0.55674	-0.448215		7.993	5.92	8.1	5.8	-2.06954	-2.26669	0.197149
YBR053C		8.03	7.67	7.8	7.2	-0.358783	-0.56675	0.207966		8.194	8.2	8.2	7.5	0.00382	-0.69846	0.702275
YOL076W	MDM20	8.16	7.96	7.6	7.9	-0.200915	0.26974	-0.470652		8.155	7.57	6.1	7.4	-0.58568	1.23105	-1.81673
YKL072W	STB6	5.92	6.36	6.3	6.7	0.445077	0.42783	0.0172503		5.978	6.98	6.3	7.2	1.00492	0.95647	0.048451
YDL138W	RGT2	4.36	5.08	6.8	7.1	0.721231	0.31177	0.409465		4.369	5.02	6.8	6.6	0.64722	-0.1722	0.819418
YKL137W	CMC1	5.45	5.5	5.6	5.1	0.051058	-0.49206	0.543122		5.624	5.19	5	5.5	-0.43863	0.50504	-0.943668
YML131W		6.89	7.2	6.2	6.1	0.308291	-0.04022	0.348509		6.278	6.45	5.6	5.5	0.1725	-0.07369	0.246181
YNL132W	KRE33	9.44	9.4	8.1	8.5	-0.03882	0.33996	-0.378779		9.006	8.67	8	8.4	-0.33547	0.40684	-0.742309
YER155C	BEM2	9	9	8.9	8.7	0.006874	-0.21752	0.224394		8.75	8.63	8	8.6	-0.12178	0.61381	-0.735588
YJL051W	IRC8	6.01	6.78	7.1	7.5	0.764877	0.35853	0.406347		6.473	6.22	7.4	6.6	-0.25429	-0.79577	0.54148
YGL090W	LIF1	3.35	3.95	5.7	5.8	0.609646	0.1362	0.473443		4.053	4.88	5.4	6.1	0.82818	0.71824	0.109938
YGR276C	RNH70	7.04	6.76	7	6.9	-0.282456	-0.0709	-0.211559		6.809	7	6.7	6.9	0.1895	0.22436	-0.034857
YDR473C	PRP3	5.55	5.46	6.1	5.9	-0.086507	-0.16955	0.0830474		5.36	5.87	4.8	6.5	0.50903	1.69988	-1.19085
YLR392C	ART10	4.48	5.18	6.2	6.4	0.704214	0.18381	0.520405		5.207	5.5	6.2	6.5	0.29364	0.37999	-0.086345
YOL133W	HRT1	6.57	6.03	7.1	6.7	-0.545354	-0.30996	-0.235398		6.197	6.57	8	7.8	0.36855	-0.18889	0.557442
YOL010W	RCL1	7.27	7.52	7.4	7.7	0.249847	0.3775	-0.127653		6.964	7.08	7.9	8.2	0.11881	0.36575	-0.246941
YHR158C	KEL1	8.27	7.78	7.3	7.2	-0.492514	-0.11183	-0.380682		8.025	7.56	5.8	6.7	-0.46534	0.82823	-1.29357
YBR035C	PDX3	8.84	8.71	7.7	7	-0.131371	-0.73514	0.603772		8.789	8.75	8	7.4	-0.03705	-0.58625	0.549199
YPR198W	SGE1	7.49	7.46	6.9	7.2	-0.034599	0.29482	-0.329423		7.394	7.76	7	7.3	0.36544	0.26361	0.101835
YNR039C	ZRG17	6.68	6.71	6.9	7.1	0.030443	0.16675	-0.136304		6.593	6.34	7	7.4	-0.25195	0.4192	-0.67115
YJL217W	REE1	7.51	7.46	7	6.8	-0.044871	-0.11097	0.0661018		7.144	6.96	7.4	6.6	-0.18555	-0.77269	0.587147
YFR031C	SMC2	6.41	6.55	7.6	7.6	0.136432	0.02584	0.110592		6.529	6.8	5.8	7.3	0.26684	1.55854	-1.2917
YPR154W	PIN3	7.39	7.7	5.9	6.5	0.311018	0.56175	-0.250735		7.977	8.24	6.2	6.4	0.26164	0.25368	0.007967
YOR038C	HIR2	6.66	6.52	7.4	7.5	-0.139552	0.04964	-0.189196		6.569	6.08	7.6	7.1	-0.48771	-0.54419	0.056477
YLR239C	LIP2	5.5	5.75	5.6	5.5	0.250605	-0.08531	0.335915		6.053	5.63	5.5	5.8	-0.42063	0.28776	-0.708383
YJL172W	CPS1	9.95	9.57	8.5	8.1	-0.376582	-0.41669	0.0401093		10.512	9.72	8.9	8.2	-0.79399	-0.74002	-0.053968
YER111C	SWI4	7.17	7.65	7	7.2	0.486528	0.23539	0.25114		7.043	7.15	5.6	6.6	0.10602	0.99041	-0.88439
YLR118C		8.04	7.62	7.1	6.8	-0.427578	-0.30534	-0.122239		7.832	8.14	7.2	7	0.31068	-0.20473	0.515413
YDR231C	COX20	5.69	6.45	6.3	6.6	0.759896	0.36068	0.399214		6.224	6.15	6.7	6.6	-0.07444	-0.14895	0.074513
YML012W	ERV25	9.36	9.16	9.2	8.9	-0.205529	-0.35793	0.152403		9.602	8.91	9.5	8.6	-0.69538	-0.92455	0.22917
YGR030C	POP6	5.31	5.85	5.3	5.5	0.538785	0.25854	0.280249		5.811	5.39	5.9	5.5	-0.42023	-0.37854	-0.041684
YER076C		3.11	3.89	6.2	5.8	0.777588	-0.34878	1.12637		3.718	4.46	6.4	6.4	0.74358	0.00255	0.741025
YKL216W	URA1	11.7	11.3	10.8	10.4	-0.392265	-0.3924	0.0001361		10.491	10.21	9.7	9.4	-0.27766	-0.30034	0.022682
YDR514C		6.3	6.91	7	7	0.607063	0.03197	0.575094		6.288	6.88	6.8	7.2	0.59676	0.34824	0.24852
YKL173W	SNU114	7.23	7.64	7.6	7.8	0.4067	0.20477	0.201931		7.148	7.47	7.4	8.1	0.32021	0.634	-0.313793
YBR273C	UBX7	7.27	7.27	7.6	7.3	0.002915	-0.2279	0.230814		7.36	7.71	7.6	7.4	0.34705	-0.17197	0.519012
YOL054W	PSH1	5.86	5.73	6.6	6.3	-0.134662	-0.28469	0.150033		5.801	5.82	6.6	6.7	0.02105	0.1612	-0.140152
YDR198C	RKM2	5.64	5.56	6.5	6.5	-0.077667	0.00157	-0.0792396		5.121	5.53	6.2	6.8	0.40522	0.54655	-0.141328
YIL016W	SNL1	6.73	7.08	6.6	6.5	0.344807	-0.03509	0.379893		6.709	6.51	6.9	6.7	-0.19746	-0.24205	0.044598
YBL095W		4.69	5.09	6.5	6.6	0.3969	0.11682	0.280079		5.07	6.1	6.9	6.9	1.03277	-0.0701	1.10287
YPL138C	SPP1	5.43	5.51	6.6	6.6	0.07801	0.04727	0.0307366		5.787	5.94	6.9	6.5	0.14905	-0.42212	0.571167
YHR021C	RPS27B	11.7	11.72	10.7	10	0.020722	-0.62285	0.643576		11.428	11.28	10.6	10	-0.14579	-0.66111	0.515311
YDR264C	AKR1	8.64	8.37	8.8	8.9	-0.268079	0.14289	-0.410973		8.217	8.27	9	9.1	0.05719	0.13975	-0.082559
YGR201C		4.38	3.01	5	4.6	-1.36909	-0.46436	-0.904723		4.249	5.28	5.2	5.1	1.03313	-0.12291	1.15604
YOR308C	SNU66	5.63	5.87	5.7	6.1	0.232564	0.31741	-0.0848491		5.938	6.33	5.5	6.6	0.39209	1.1324	-0.740313
YLL002W	RTT109	5.77	5.23	6.1	5.8	-0.5359	-0.35556	-0.180341		5.668	5.25	6.3	5.5	-0.41303	-0.75863	0.345604
YKL027W		6.98	7.36	7.9	7.8	0.373803	-0.02577	0.399577		7.495	7.62	8.2	8.1	0.12792	-0.09369	0.221603
YGR047C	TFC4	6.96	6.93	7.4	7.4	-0.03277	-0.00648	-0.0262938		6.947	6.78	7.1	7.2	-0.16273	0.09138	-0.254116
YER045C	ACA1	4.3	5.41	5.2	5.8	1.10756	0.63944	0.468114		4.427	5.92	5.6	5.8	1.49568	0.16451	1.33117
YDR066C	RTR2	5	4.7	4.8	5.2	-0.302662	0.35191	-0.654568		5.44	6.01	6	6	0.57224	-0.01933	0.591577
YDR365C	ESF1	7.66	8.05	8.7	8.2	0.396573	-0.46684	0.863415		6.904	7.33	7.6	8.5	0.42927	0.90485	-0.475577
YMR283C	RIT1	5.96	5.94	6.5	6.8	-0.013216	0.37607	-0.389288		5.231	5.7	6.6	6.8	0.46683	0.20067	0.26616
YGR146C	ECL1	6.3	6.55	5.1	5.8	0.255697	0.73372	-0.47802		6.539	7.51	5.1	6.1	0.97049	1.00693	-0.036438
YOR209C	NPT1	9.24	8.98	8.6	8.5	-0.25118	-0.09412	-0.157056		9.113	8.68	8.7	8.4	-0.43027	-0.2734	-0.156872
YNL145W	MFA2	9	8.64	6.9	7	-0.364334	0.09746	-0.461791		8.028	8.9	6.6	6.7	0.8693	0.15331	0.715987
YER144C	UBP5	6.08	6.44	6.7	7.5	0.357084	0.89169	-0.534609		6.077	6.15	6.7	7.3	0.06911	0.57997	-0.510869
YKL126W	YPK1	8.38	8.24	8.5	8.2	-0.147253	-0.27626	0.129006		8.39	7.62	8.2	7.9	-0.77401	-0.33909	-0.434921
YOL023W	IFM1	4.76	4.67	5.6	5.4	-0.084022	-0.18051	0.0964903		4.59	4.45	5.2	5	-0.13956	-0.21776	0.078199
YOR281C	PLP2	7.34	6.97	6.9	7	-0.370641	0.0652	-0.435844		6.821	6.87	7.1	7.2	0.04387	0.04831	-0.004444
YBR125C	PTC4	5.79	6.55	6.8	6.9	0.756277	0.14259	0.61369		6.269	6.28	7.1	6.9	0.00904	-0.22032	0.229361
YGR289C	MAL11	0.18	0.84	5.4	6.2	0.659035	0.79207	-0.13303		-0.949	0.46	5.2	5.4	1.4069	0.19332	1.21358
YIL124W	AYR1	8.41	8.74	8.5	8.2	0.328877	-0.25155	0.580423		8.668	8.76	8.4	7.5	0.09181	-0.87855	0.970355
YCR007C		4.18	3.31	4.8	5	-0.87378	0.22808	-1.10186		3.857	5.36	5.5	6.1	1.50152	0.67411	0.827411
YML065W	ORC1	6.98	6.41	7.1	7.2	-0.565686	0.11323	-0.678911		6.799	6.19	6.5	7	-0.60561	0.53871	-1.14432
YNL088W	TOP2	9.03	8.87	8	8.3	-0.158202	0.31969	-0.477894		8.96	7.97	6.4	7.8	-0.98529	1.42351	-2.4088
YDR022C	CIS1	4.32	4.35	5.3	5	0.030353	-0.23399	0.264342		5.313	5.41	6	5.2	0.09546	-0.81721	0.912671
YPL183C	RTT10	7.95	8.21	8.5	8.5	0.264199	0.05669	0.207508		7.795	8.2	8.3	8.7	0.40193	0.37438	0.027551
YPR066W	UBA3	3.54	4.37	5.1	5.5	0.83159	0.38639	0.445204		4.109	4.16	5.7	4.8	0.04976	-0.86037	0.910138
YNL189W	SRP1	9.79	9.16	9.2	8.8	-0.630876	-0.37022	-0.260657		9.705	9.11	9.3	8.9	-0.59907	-0.32894	-0.270125
YLR228C	ECM22	5.29	5.89	6.9	7.2	0.603007	0.24456	0.358449		5.054	4.89	6.6	6.6	-0.16737	0.00031	-0.167679
YPL082C	MOT1	8.02	8.28	8	8.1	0.253681	0.09941	0.154269		7.696	8	8	7.8	0.30137	-0.19031	0.491688
YGR102C		5.74	5.91	5.5	6	0.166069	0.52458	-0.358515		5.639	6.17	5.8	6.3	0.53315	0.47719	0.055964
YDR123C	INO2	5.12	5.27	6.1	6.2	0.149195	0.09228	0.0569104		5.679	5.8	6.3	6	0.12092	-0.28038	0.401305
YGR245C	SDA1	8.34	8.29	8	8.1	-0.054084	0.12419	-0.178279		7.845	7.4	7.8	8.2	-0.44276	0.37873	-0.821485
YBR262C	AIM5	5.16	5.79	5	5.2	0.632408	0.196	0.436405		5.722	5.97	5.4	5.3	0.24561	-0.11743	0.363034
YMR180C	CTL1	4.66	5.31	6.2	6.5	0.65198	0.27664	0.37534		4.769	6.21	6.9	7.1	1.44344	0.25798	1.18546
YBR060C	ORC2	6.31	6.25	6.8	6.9	-0.061008	0.06349	-0.124502		6.387	6.71	7.3	7	0.32718	-0.3642	0.691376
YNL101W	AVT4	6.2	6.8	7.7	7.9	0.602783	0.21005	0.392734		6.545	5.95	7.9	7.9	-0.59005	0.08312	-0.673176
YMR116C	ASC1	13.34	13.45	12.3	12	0.102405	-0.35135	0.453757		13.097	12.84	12.1	11.2	-0.25963	-0.86466	0.605031
YFL008W	SMC1	8	7.78	7.3	7.6	-0.222075	0.27729	-0.499369		7.731	7.53	5.5	7	-0.20117	1.5664	-1.76757
YER089C	PTC2	8.76	8.41	7.6	7.7	-0.343714	0.06485	-0.408563		8.013	7.71	8	7.7	-0.30436	-0.36761	0.063251
YDL208W	NHP2	8.65	8.78	8.4	8.2	0.136981	-0.11502	0.252001		8.285	7.96	8.3	7.8	-0.32283	-0.48544	0.162603
YKR087C	OMA1	6.2	6.15	6.9	7	-0.040901	0.06661	-0.10751		6.348	6.72	7	6.9	0.36759	-0.04705	0.414645
YGL041W-A		5.94	6.01	6	5.8	0.075181	-0.15592	0.231103		6.602	6.56	6.1	6	-0.04027	-0.05589	0.015623
YBR042C	CST26	7.19	6.74	7.2	6.9	-0.444693	-0.36608	-0.0786135		6.774	6.32	7.2	6.8	-0.45201	-0.3649	-0.08711
YGR065C	VHT1	6.46	6.58	7.4	7.7	0.119469	0.30648	-0.187007		6.37	6.97	7.8	8.2	0.60133	0.38464	0.216689
YNL220W	ADE12	8.91	8.61	8.9	8.4	-0.303022	-0.49072	0.187701		8.715	8.87	8.7	9	0.15098	0.29113	-0.140153
YGR267C	FOL2	7.92	7.45	8.2	7.8	-0.47973	-0.43952	-0.0402066		7.514	7.57	8.4	8.1	0.05187	-0.25104	0.302908
YBR143C	SUP45	10.21	10.17	9.6	9.4	-0.039027	-0.20486	0.165832		9.763	9.61	8.7	8.8	-0.15404	0.16062	-0.314667
YGL180W	ATG1	5.52	6.41	4.7	5.2	0.886431	0.50966	0.376772		5.506	6.37	4.7	4.9	0.86648	0.17818	0.688297
YPR101W	SNT309	5.82	5.25	6.2	6.1	-0.573046	-0.16629	-0.406754		5.334	6.01	6	6.5	0.67493	0.48295	0.191975
YDR541C		3.25	4.37	5.7	5.7	1.12236	-0.02186	1.14422		4.62	4.42	6.1	6.5	-0.20135	0.38109	-0.582442
YNL321W	VNX1	7.52	7.84	7.3	7.5	0.32011	0.16422	0.155888		7.861	7.14	7.3	7.2	-0.72279	-0.0527	-0.670088
YNL123W	NMA111	8.76	8.59	8.7	8.8	-0.170437	0.09226	-0.262696		8.766	8.41	8.6	8.8	-0.35931	0.11084	-0.470143
YOL001W	PHO80	3.88	4.25	5.9	6.1	0.376056	0.16474	0.211316		4.073	4.78	6.1	5.8	0.71136	-0.28289	0.994248
YBR204C		6.3	5.96	6.7	6.2	-0.341544	-0.48648	0.144934		6.3	6.43	6.5	6.6	0.12943	0.07882	0.050608
YHR149C	SKG6	7.45	7.46	7.3	7.6	0.013179	0.29913	-0.285951		6.832	6.7	7	6.9	-0.13545	-0.09581	-0.039636
YOL100W	PKH2	6.39	6.18	7.1	7.1	-0.203935	0.01064	-0.214574		6.008	5.94	6.3	7.2	-0.07198	0.93308	-1.00506
YFR046C	CNN1	4.46	4.25	5.1	5.1	-0.211858	0.03297	-0.244832		4.328	5.13	5.3	5.7	0.80443	0.34979	0.45464
YJL026W	RNR2	10.75	10.72	8.8	8.6	-0.031895	-0.21333	0.181438		10.894	10.36	9.1	8.1	-0.53124	-1.01049	0.479246
YDR202C	RAV2	5.74	6.01	6.1	6.5	0.271475	0.33165	-0.060177		6.257	6.59	6.7	6.7	0.3359	-0.01395	0.349851
YPR189W	SKI3	8.62	8.61	8.2	8.4	-0.009244	0.19538	-0.204624		8.613	8.22	7.7	8.1	-0.39746	0.45707	-0.854526
YIL142W	CCT2	9.64	9.47	8.9	8.9	-0.17796	-0.05437	-0.123588		9.358	9.17	9.1	8.8	-0.19073	-0.26527	0.074543
YER122C	GLO3	8.99	8.52	8.6	8.3	-0.465786	-0.29299	-0.172799		8.94	8.09	8.4	7.7	-0.85313	-0.66586	-0.187262
YDR303C	RSC3	8.02	7.44	8.1	7.8	-0.579776	-0.27238	-0.307392		7.732	7.05	7.4	7.5	-0.68454	0.08406	-0.768601
YMR229C	RRP5	10.43	10.44	9	9.1	0.015972	0.12117	-0.105196		9.741	9.52	8.4	9	-0.21614	0.61181	-0.82795
YKL207W	AIM27	8.56	8.18	8.3	7.6	-0.374657	-0.75717	0.382514		8.487	8.09	8.3	7.7	-0.39611	-0.5627	0.166586
YOR128C	ADE2	8.67	8.62	9.6	9	-0.047511	-0.67596	0.628446		8.59	9.36	9.1	10	0.77017	0.95456	-0.184393
YGR223C	HSV2	5.96	5.77	6.7	6.9	-0.193584	0.21125	-0.404832		5.516	5.82	6.7	6.9	0.30399	0.18042	0.123572
YNL066W	SUN4	9.92	8.95	8.8	8.2	-0.973272	-0.62512	-0.348147		9.243	8.2	9.1	8.3	-1.04606	-0.86143	-0.184634
YJL062W	LAS21	8.05	7.57	7.5	7.4	-0.481824	-0.09713	-0.384698		8.203	6.8	7.6	7.1	-1.4022	-0.44392	-0.958286
YLR008C	PAM18	6.76	6.44	6.4	6.4	-0.326599	-0.02986	-0.29674		6.564	6.53	6.3	6.3	-0.03634	-0.05257	0.016234
YDR101C	ARX1	8.98	8.91	8.2	8.6	-0.06775	0.39192	-0.459673		8.44	8.38	8.1	8.5	-0.0562	0.38241	-0.438611
YPR145W	ASN1	10.82	11.02	9.8	10.4	0.19662	0.60244	-0.405817		10.524	10.28	9.3	9.6	-0.24909	0.30735	-0.55644
YML102W	CAC2	6	6.74	7.4	7.4	0.733087	0.01568	0.71741		6.249	6.54	7.6	7.5	0.29074	-0.13751	0.428249
YGR120C	COG2	5.84	5.75	6.1	5.9	-0.089487	-0.184	0.0945171		6.083	5.57	5.9	5.5	-0.51359	-0.39129	-0.122295
YDR404C	RPB7	7.22	7.21	6.8	6.9	-0.00282	0.11472	-0.117541		7.046	6.85	7	7.3	-0.19245	0.23308	-0.425529
YLR181C	VTA1	6.84	6.56	6	6.1	-0.283307	0.11023	-0.393538		6.547	6.37	6.1	5.7	-0.17855	-0.44804	0.269483
YOL045W	PSK2	7.02	7.45	7.4	7.5	0.431313	0.04956	0.381756		7.523	7.42	6.7	7.5	-0.10607	0.85893	-0.965001
YKL041W	VPS24	6.05	6.12	6.6	6.5	0.064148	-0.15297	0.217117		6.156	6.26	6.2	6.8	0.1067	0.671	-0.564301
YDR505C	PSP1	7.94	8.14	7.1	7	0.199761	-0.18772	0.387483		7.619	7.79	6.4	6.7	0.16838	0.24715	-0.078773
YOL144W	NOP8	6.67	6.65	6.6	6.8	-0.017925	0.25167	-0.269597		6.615	6.79	6.7	7.1	0.17814	0.37856	-0.200415
YKL140W	TGL1	7.64	7.64	7.5	7.1	0.000114	-0.38203	0.382146		7.809	7.73	7.5	7.1	-0.07987	-0.39505	0.315181
YBR107C	IML3	2.88	4.09	5	5.4	1.21241	0.3996	0.812814		4.055	4.04	4.4	5.3	-0.01355	0.92885	-0.942398
YDR088C	SLU7	5.29	5.55	6.3	6.2	0.26399	-0.1497	0.413685		5.269	5.39	5	6.5	0.12279	1.45649	-1.3337
YIR018W	YAP5	4.97	4.88	5.8	6.6	-0.083927	0.80708	-0.891009		4.516	6.21	6.7	7.8	1.69019	1.01873	0.671465
YLR099W-A		5.23	5.53	5.7	5.9	0.295529	0.18338	0.112146		5.761	5.75	6.4	5.7	-0.00567	-0.71262	0.706951
YCR012W	PGK1	14.99	13.97	12.9	11.4	-1.02202	-1.42612	0.404101		15.292	14.92	13	11.7	-0.36893	-1.22074	0.851814
YDR334W	SWR1	6.69	6.32	7.6	7	-0.370589	-0.59199	0.221404		5.733	6.39	6.4	7	0.65761	0.54704	0.110571
YER014W	HEM14	7.03	6.8	7	6.5	-0.222867	-0.50516	0.282288		7.058	7.23	7.4	7.2	0.17249	-0.1823	0.354787
YPL196W	OXR1	6.21	5.82	6.2	6.2	-0.387115	-0.00226	-0.384854		6.271	6.65	6.7	7	0.38198	0.30166	0.080317
YGR016W		4.88	4.52	4.9	4.8	-0.362722	-0.02857	-0.33415		4.796	4.65	5.1	5.3	-0.14947	0.14592	-0.295397
YNL037C	IDH1	8.98	8.55	8.2	8.2	-0.432813	-0.00505	-0.427767		9.143	10.21	8.9	9.2	1.06891	0.23857	0.830341
YJL110C	GZF3	6.58	6.98	7	7.4	0.399587	0.38508	0.0145107		6.277	6.96	6.9	7.3	0.68549	0.37402	0.311467
YIL157C	COA1	6.84	6.77	6.6	6.5	-0.078287	-0.03059	-0.0476968		7.02	6.84	7	6.1	-0.18058	-0.92742	0.746839
YHL031C	GOS1	6.47	6.68	6.2	6.2	0.218654	-0.0361	0.254756		7.079	6.7	6.5	5.7	-0.37642	-0.79607	0.419643
YLR344W	RPL26A	11.14	11.06	10.1	9.7	-0.08397	-0.37908	0.295106		10.804	10.86	10	9.4	0.05646	-0.58431	0.640772
YIL074C	SER33	8.45	8.08	7.8	7.8	-0.377373	0.08045	-0.457823		7.953	7.89	7.8	8	-0.06237	0.14942	-0.211788
YOR294W	RRS1	7.78	7.81	6.5	6.4	0.024219	-0.07298	0.0972016		7.536	7.5	6.8	6.4	-0.03602	-0.38193	0.345908
YLR419W		7.37	7.89	7.1	7.5	0.519226	0.34966	0.169567		7.386	7.63	6.6	7.3	0.23911	0.76504	-0.525931
YJR138W	IML1	6.79	7.25	6.9	7.4	0.459197	0.42179	0.0374095		6.859	7.05	6.6	7.2	0.19284	0.57324	-0.380407
YBR255W	MTC4	4.73	5.53	6.8	6.7	0.802627	-0.01499	0.817612		5.529	6.14	6.3	7	0.60886	0.70872	-0.099858
YJL154C	VPS35	8.43	8.27	8.7	8.5	-0.157546	-0.195	0.0374504		8.28	7.92	8.4	8.2	-0.36001	-0.17581	-0.184193
YNL316C	PHA2	5.97	6.44	6.1	6.4	0.466692	0.3267	0.139996		5.863	6.6	6.6	6.8	0.73902	0.19886	0.540159
YNL271C	BNI1	8	8.43	7.6	7.8	0.427634	0.19472	0.232913		7.291	7.86	6.5	7.7	0.56556	1.24232	-0.67676
[truncated: 2,923 more rows]

## Sheet: Tif1 dependent genes
#YORF	Gene	ΔTE tif1-ts(37⁰C)
YOR195W	SLK19	-5.56494
YHR023W	MYO1	-2.93976
YDL058W	USO1	-2.73493
YKR095W	MLP1	-2.68372
YIL149C	MLP2	-2.60149
YNL250W	RAD50	-2.45916
YNL088W	TOP2	-2.4088
YNL112W	DBP2	-2.19301
YOR346W	REV1	-2.17111
YGL086W	MAD1	-2.09406
YPL146C	NOP53	-2.06902
YLR309C	IMH1	-1.93379
YOL145C	CTR9	-1.88762
YNL227C	JJJ1	-1.83248
YHR042W	NCP1	-1.83089
YOL076W	MDM20	-1.81673
YJL049W		-1.78465
YFL008W	SMC1	-1.76757
YHR154W	RTT107	-1.67239
YMR011W	HXT2	-1.65526
YJR134C	SGM1	-1.53824
YEL061C	CIN8	-1.52584
YPR055W	SEC8	-1.50834
YCL061C	MRC1	-1.50283
YER165W	PAB1	-1.4388
YPL195W	APL5	-1.39465
YLR086W	SMC4	-1.36235
YOL154W	ZPS1	-1.32259
YKL101W	HSL1	-1.31821
YFR031C	SMC2	-1.2917
YKL201C	MNN4	-1.28965
YBR271W		-1.1798
YLR327C	TMA10	-1.14888
YGR159C	NSR1	-1.10292
YOR261C	RPN8	-1.08484
YMR291W		-1.08069
YMR251W-A	HOR7	1.15565
YPR149W	NCE102	1.19067
YDL223C	HBT1	1.1907
YAL034C	FUN19	1.28045
YBR085C-A		1.28047
YIL177C		1.58508
YDR082W	STN1	1.58874
YJL225C		1.60003
YCR021C	HSP30	1.65238
YLR467W	YRF1-5	1.70831
YDR545W	YRF1-1	1.71387
YOR396W	YRF1-8	1.71783
YNL339C	YRF1-6	1.72416
YPL283C	YRF1-7	1.74421
YGR296W	YRF1-3	1.7463
YCR005C	CIT2	1.76551
YML133C		1.81157
YIR019C	MUC1	1.82143
YEL077C		1.83841
YPR204W		1.85567
YLL067C		1.88454
YLL066C		1.89286
YHL050C		1.91136
YJL106W	IME2	1.92685
YHR219W		2.0867
YHL016C	DUR3	2.20261
YBR295W	PCA1	2.4477
YEL072W	RMD6	3.5726
YLR174W	IDP2	4.54251
YOL013W-A		5.51288
YPR108W-A		5.90899
YNL042W-B		6.15529

## Sheet: PARS data Tif1 dependent mRNAs
#YORF	Gene	Length	Total	Avg	First30	Start30	Max30	Plus15	Plus30	Plus45	Plus60	Plus75
YBR085C-A		58	21.66	0.37	10.42	21.53	22.46	-0.67	-32.54	-5.24	20.67	14.82
YCR005C	CIT2	47	5.8	0.12	5.71	0.74	5.71	-4.04	-2.09	-2.45	3.17	10.41
YER165W	PAB1	134	13.41	0.1	1.11	33.83	38.06	43.18	6.58	-10.7	-11.35	25.31
YHR042W	NCP1	33	25.22	0.76	23.09	15	31.04	-37.69	-26.4	24.79	58.44	72.11
YMR011W	HXT2	41	-16.34	-0.4	-6.38	2.29	1.6	36.8	38.95	32.59	28.7	42.49
YMR251W-A	HOR7	29	-24.99	-0.86	-24.37	-28.84	-22.77	0.39	35.13	29.57	18.96	-0.81
YNL112W	DBP2	34	-11.25	-0.33	-8.87	-0.71	-3.54	3.6	23.9	35.05	16.08	-2.12
YOL013W-A		36	0	0	0	0	0	0	-5.38	-19.73	-22.11	-7.95
YOR261C	RPN8	106	-1.59	-0.01	-1.56	15.09	20.88	38.02	35.47	41.59	21.24	-6.85
YPR149W	NCE102	172	65.19	0.38	-15.18	57.01	47.71	68.86	53.23	18.01	12.77	25.67
